# Supplementary material for: Multiple effect mechanisms of FLNC in dilated cardiomyopathy based on genetic variants, transcriptomics, and immune infiltration analysis
Source: Research Square preprint supplement (doi:10.21203/rs.3.rs-2795537/v1), 2023-04-12
Supplement: Supplementary file 1 [file 13ca9f558dcf28f7d8af42c8.xlsx]

## Sheet: GSE3586
normalized GSE3586
id	GSM82393_con	GSM82394_con	GSM82395_con	GSM82396_con	GSM82397_con	GSM82398_con	GSM82399_con	GSM82400_con	GSM82401_con	GSM82402_con	GSM82403_con	GSM82404_con	GSM82405_con	GSM82406_con	GSM82407_con	GSM82408_treat	GSM82409_treat	GSM82410_treat	GSM82411_treat	GSM82412_treat	GSM82413_treat	GSM82414_treat	GSM82415_treat	GSM82416_treat	GSM82417_treat	GSM82418_treat	GSM82419_treat	GSM82420_treat
A1BG	-0.530173	-0.489122	-0.485292	-0.34362	-0.433378	-0.442157	-0.385882	-0.346137	-0.456402	-0.477305	-0.478278	-0.440506	-0.36302	-0.388324	-0.453103	-0.550925	-0.38476	-0.396165	-0.609393	-0.549737	-0.654266	-0.523452	-0.400389	-0.275835	-0.663174	-0.484302	-0.294254	-0.681281
A1CF	-1.00236	-0.964073	-0.679925	-1.15215	-1.04723	-1.06307	-1.12297	-1.32185	-1.07425	-0.601707	-0.766123	-0.808875	-0.565438	-0.9861	-0.857434	-0.813709	-0.925308	-0.969263	-0.882257	-0.869011	-0.92215	-0.939522	-0.695065	-0.762768	-1.14297	-0.386017	-0.558587	-0.847565
A2M	0.209896	0.256566	0.291308	0.346185	0.356426	0.390514	0.262742	0.507491	0.420101	0.466528	0.327154	0.35881	0.44841	0.625461	0.578374	0.310857	0.529185	0.285722	0.342258	0.220083	0.680203	0.239949	0.0685128	0.22575	0.271004	0.269507	0.0756843	0.486715
AAAS	0.142384	-0.335823	-0.144114	-0.164545	-0.348602	-0.146945	-0.473951	-0.108416	0.158529	0.220818	-0.0324852	0.0272325	0.119817	0.0632999	0.0100255	-0.0941592	0.233033	0.222434	0.128707	-0.0597724	0.131718	0.0913299	-0.27918	-0.147974	0.1387	0.164744	0.293794	0.303648
AACS	1.03333	1.05251	1.04549	1.24594	1.4701	1.31435	1.1988	1.25893	0.987307	0.827693	1.19534	1.228	1.17211	1.26288	1.10354	1.08705	1.02764	0.949936	0.96917	1.06526	1.11158	1.14453	1.00398	1.06757	1.01698	0.98456	0.758811	0.718203
AADAC	-0.179109	-0.309411	-0.40854	-0.308091	-0.312299	-0.179253	-0.190614	-0.188146	-0.339835	-0.338739	-0.233098	-0.407779	-0.374542	-0.566936	-0.328936	-0.322467	-0.37805	-0.345893	-0.489122	-0.314684	-0.383635	-0.114361	-0.347249	-0.298542	-0.269464	-0.139411	0.0760404	-0.322601
AADACL2	0.516144	0.142002	0.504518	0.380264	0.188661	0.324732	0.163006	0.36733	0.411451	0.24644	0.242318	0.330942	0.283733	0.331665	0.188661	0.286324	0.488923	0.195853	0.102947	0.204097	0.0652774	0.201339	0.342468	0.399268	0.226922	0.217877	0.217825	0.373696
AADACL4	0.191646	0.174278	0.276497	0.101168	0.338184	0.16774	0.223847	0.0856548	0.20291	0.133153	0.286241	0.171796	0.208419	0.111967	0.128966	-0.00389416	0.182958	0.158116	0.141135	0.189295	0.0575247	0.061542	0.124511	0.0663189	-0.0421288	0.0790591	0.019636	0.0880821
AADAT	-0.100023	0.21795	0.0428353	-0.0885213	0.116705	-0.0836826	0.00970177	0.133902	-0.455129	-0.307445	-0.0880133	0.0125356	-0.236089	-0.176497	-0.214992	0.181279	0.0185357	-0.0827258	-0.0226754	0.00861175	-0.033601	-0.102195	-0.117843	-0.0714741	-0.144909	-0.12105	-0.282149	-0.0346866
AAED1	-0.0228204	0.0483394	0.316711	0.162812	0.0588404	0.0846459	0.105948	0.244534	-0.00860986	0.0918842	0.0288417	-0.0150288	-0.0230309	0.0463934	0.106283	0.0809738	0.135923	-0.178633	-0.0134809	-0.00150287	0.0504705	-0.0320521	0.00856902	0.0269141	0.0542054	-0.0731351	-0.115773	0.130346
AAGAB	-0.325481	-0.214639	-0.279868	-0.171646	-0.261768	-0.438901	-0.2831	-0.391212	-0.20055	-0.344975	-0.155544	-0.37284	-0.248217	-0.538363	-0.366091	-0.327204	-0.464774	-0.135325	-0.16618	-0.482901	-0.373338	-0.365722	-0.380004	-0.638047	-0.436697	-0.29719	-0.752591	-0.5453
AAK1	0.125842	0.284853	0.30701	0.306771	0.286717	0.200432	0.29493	0.224015	0.204703	0.250631	0.205046	0.207181	0.322634	0.273329	0.217825	0.171177	0.245693	0.133338	0.18493	0.24202	0.19836	0.200365	0.233476	0.119049	0.226561	0.0524158	0.0121156	0.050148
AAMDC	0.721435	0.912292	0.854499	0.569072	0.672265	0.661996	0.621772	0.664549	0.822427	0.535126	0.908469	0.820079	0.744082	0.789671	0.635175	0.575119	0.557737	0.478443	0.49726	0.756819	0.591335	0.621073	0.525595	0.682286	0.51291	0.437657	0.663399	0.454584
AAMP	-0.315655	0.0602231	-0.0733601	-0.357277	-0.190549	-0.275647	-0.132638	-0.0429623	-0.157263	-0.0266237	-0.0662341	-0.0157275	0.0347275	-0.249082	-0.208135	-0.229833	0.0377056	-0.348848	-0.0717495	-0.0870177	-0.112533	-0.0194391	-0.075201	-0.0247223	-0.0657496	-0.055324	0.0259381	0.247254
AANAT	0.212763	0.394691	0.242853	0.314127	0.341199	0.268619	0.217489	0.107211	0.323296	0.263674	0.145009	0.331067	0.366393	0.350576	0.337919	0.265527	0.25969	0.174116	0.233263	0.286424	0.316355	0.292565	0.332257	0.390956	0.165436	0.318052	0.340868	0.339861
AAR2	-0.333311	-0.519799	-0.572008	-0.500658	-0.229643	-0.182189	-0.456604	-0.405254	-0.326649	-0.50492	-0.49478	-0.430806	-0.597498	-0.368391	-0.216291	-0.386117	-0.285068	-0.110334	-0.358758	-0.263544	-0.229435	-0.0569933	-0.402119	-0.122459	-0.329518	-0.257846	-0.195147	-0.438128
AARD	0.286906	0.312946	0.0391958	0.103142	0.0436585	0.288576	0.317922	-0.00124206	0.177742	0.268962	0.288296	0.296908	0.172335	0.371807	0.336122	0.20914	0.190671	0.161265	0.087689	0.0183038	0.222434	0.178412	0.414052	0.10796	-0.0274359	0.377623	0.184022	0.301599
AARS	-1.09302	-1.21854	-0.9861	-1.30411	-1.45358	-1.32331	-1.15815	-1.45923	-1.07531	-1.25775	-1.25204	-1.20165	-0.889401	-1.43517	-1.19679	-1.41695	-1.0124	-1.24839	-1.23972	-1.27427	-1.36897	-1.26374	-1.29504	-1.40332	-1.35906	-1.16877	-1.39075	-1.22342
AARS2	-0.337426	-0.453688	-0.257615	-0.379259	-0.340834	-0.335288	-0.354816	-0.333933	-0.206931	-0.40393	-0.455294	-0.511225	-0.424679	-0.170261	-0.320015	-0.397351	-0.51602	-0.575776	-0.400921	-0.346137	-0.512302	-0.447897	-0.347897	-0.350008	-0.411628	-0.445057	-0.402474	-0.598983
AASDH	-0.14078	-0.0939847	-0.0323728	-0.143867	-0.0896097	-0.294846	-0.175525	-0.0309492	-0.218875	-0.3485	-0.224434	-0.143448	-0.14151	-0.42883	-0.308362	-0.269122	-0.141453	-0.278715	-0.243086	-0.348848	-0.0793482	-0.292562	-0.24343	-0.200807	-0.0676485	-0.142506	-0.0554255	-0.16274
AASDHPPT	-0.373774	-0.21559	-0.175083	-0.304057	-0.344215	-0.327847	-0.130848	-0.174363	-0.324593	-0.353552	-0.260584	-0.266203	-0.419934	-0.439173	-0.272761	-0.623868	-0.444331	-0.294016	-0.217255	-0.265179	-0.255245	-0.423261	-0.18169	-0.378723	-0.2977	-0.366869	-0.30473	-0.187047
AASS	-0.914842	-0.971884	-0.862771	-0.897677	-0.839082	-0.889401	-0.80153	-0.751397	-0.899028	-0.878819	-0.964666	-0.820644	-0.940613	-0.736405	-0.846776	-1.05833	-0.965157	-1.16646	-1.12114	-1.07425	-1.03912	-0.916272	-0.984909	-1.09792	-0.959556	-1.07633	-1.01062	-0.980339
AATF	-0.422683	-0.325857	-0.316289	-0.384474	-0.35552	-0.347897	-0.207193	-0.54821	-0.416811	-0.3867	-0.345234	-0.498025	-0.233375	-0.374409	-0.301023	-0.261135	-0.324266	-0.325966	-0.167705	-0.38547	-0.283006	-0.375533	-0.217255	-0.254844	-0.167254	-0.290022	-0.248518	-0.238308
ABAT	-0.254929	-0.420857	-0.384616	-0.364968	-0.102849	-0.0343123	-0.273196	-0.053443	-0.115132	-0.60359	-0.281856	-0.16092	-0.244099	-0.0716599	-0.125507	-0.21507	0.0760878	0.19223	-0.0979607	0.0483949	-0.0771083	-0.0191251	-0.0120618	0.272335	0.0305362	0.0487738	-0.234595	0.51326
ABCA1	0.429189	0.397113	0.330442	0.305726	0.0494309	0.298185	0.375113	0.321968	0.261796	0.618882	0.351259	0.648946	0.442197	0.623727	0.610393	0.558404	0.437307	0.811322	0.728154	0.569072	0.561994	0.730553	0.48227	0.497598	0.66594	0.428409	0.682871	0.53555
ABCA10	-0.316289	-0.337548	-0.319605	-0.364808	-0.288376	-0.263263	-0.402899	-0.186968	-0.489524	-0.121527	-0.372968	-0.128975	-0.246645	-0.152581	-0.202101	-0.289642	-0.222575	-0.243323	-0.386502	-0.198122	-0.211908	-0.0847268	-0.342824	-0.155719	-0.237902	-0.145879	-0.173744	-0.0735705
ABCA12	-0.0678346	-0.176447	0.0862973	0.120121	0.0137822	-0.16618	-0.151468	-0.000294411	-0.205844	-0.115773	-0.148249	-0.134326	-0.0747723	-0.174834	-0.347367	-0.26465	-0.376109	-0.357277	-0.338835	-0.272494	-0.28568	-0.295864	-0.415945	-0.341186	-0.264972	-0.468307	-0.355899	-0.248679
ABCA2	-0.18484	-0.0726117	-0.184003	-0.103588	-0.115346	-0.199147	-0.154937	-0.213669	-0.283744	-0.142809	-0.351649	-0.221216	-0.377226	-0.146945	-0.28267	-0.253834	-0.446468	-0.149812	-0.178547	-0.108125	-0.357036	-0.334863	-0.335957	-0.479513	-0.327615	-0.26157	-0.287903	-0.375246
ABCA3	0.24513	0.0186346	0.112536	0.103827	-0.167833	0.0489855	0.0109949	-0.0512555	0.0287657	0.109363	0.0101873	-0.0145439	0.067329	0.0147406	0.155162	0.108869	0.205991	0.239949	0.143	0.200646	0.0987218	0.188471	0.0134376	0.0542054	0.120619	0.157572	0.163353	0.165362
ABCA4	-0.460133	0.210842	-0.0392105	0.15664	-0.520311	-0.850528	-0.283555	-0.800913	-0.295562	-0.380522	-0.643564	-0.534245	-0.0450014	-0.376545	-0.761462	-0.246572	-0.351308	-0.773569	-0.515648	-0.404772	-0.407682	-0.492691	-0.987415	-0.0206536	-0.626581	-0.187942	0.0372366	-0.0966312
ABCA5	-0.439488	-0.431725	-0.364968	-0.263263	-0.586443	-0.440729	-0.491132	-0.466535	-0.364968	-0.217806	-0.219314	-0.251505	-0.446468	-0.00585521	-0.282556	-0.152904	-0.382838	-0.030889	0.180351	-0.241001	-0.250969	-0.123827	-0.133575	-0.251874	-0.347628	-0.158535	-0.0321951	-0.173434
ABCA6	0.356559	0.093513	0.0608431	0.125188	0.183885	0.145138	0.292795	0.0931495	0.0921106	0.0657459	-0.163624	0.057773	-0.0307725	0.111626	0.121391	0.0993781	0.016487	0.118299	0.207181	0.165566	0.117878	0.112098	0.0755277	0.20366	0.110194	0.130762	0.146603	0.260757
ABCA7	0.0884913	-0.241208	-0.18494	-0.0460729	0.224287	-0.025059	-0.0400299	-0.0361401	-0.0119105	-0.0743534	-0.156724	-0.121115	-0.221658	-0.34702	-0.0789713	-0.0459291	-0.260966	-0.224809	-0.214285	-0.0843711	-0.0674016	-0.0170951	-0.128429	-0.137178	-0.079417	-0.025786	-0.301823	-0.216883
ABCA8	0.461902	0.762639	0.532767	0.81886	0.501457	0.510976	0.41809	0.50205	0.675832	0.435648	0.485062	0.434735	0.345347	0.379014	-0.0705597	0.279629	0.141347	0.116589	0.274982	0.213677	0.345347	0.422093	0.329159	0.0367704	0.136462	0.28245	0.207034	0.446895
ABCA9	0.126809	0.058711	0.0857202	0.0651623	0.0578804	0.0274142	0.0100888	0.0691566	0.0315424	0.0245056	-0.0450014	0.0914588	0.0291122	-0.0623717	0.0247622	0.0570475	0.0471869	0.0246596	-0.0517058	0.0237129	0.233115	0.118544	0.0715399	0.201704	0.215069	0.108628	0.127655	0.0347831
ABCB1	-0.234992	-0.0932467	-0.152969	-0.167392	-0.106312	-0.299778	-0.165758	-0.036285	-0.310718	-0.30045	-0.230992	-0.327077	-0.269464	-0.272575	-0.0869205	-0.293244	-0.238125	-0.387584	-0.224434	-0.12592	-0.4999	-0.063141	-0.355899	-0.330859	-0.288578	-0.0479622	-0.217255	-0.217255
ABCB10	0.0643401	0.164575	0.0166994	-0.0489334	0.0127489	-0.142585	0.142441	-0.00808825	-0.0774544	-0.107467	0.00759002	-0.0445281	-0.0500936	-0.233299	0.0345668	-0.282356	-0.0395424	0.0882247	-0.102537	-0.243685	-0.0728236	-0.109286	-0.0901193	0.199072	-0.0781191	-0.110167	-0.0669769	-0.0586393
ABCB11	-0.608292	-0.725156	-0.342694	-0.583271	-0.4686	-0.468307	-0.393878	-0.342957	-0.720483	-0.692081	-0.652213	-0.689567	-0.598744	-0.382706	-0.234254	-0.502891	-0.64279	-0.726578	-0.664066	-0.901604	-0.486693	-0.51602	-0.51889	-0.662097	-0.671802	-0.618842	-0.515256	-0.607649
ABCB4	0.0686706	-0.01017	-0.0887628	-0.201351	-0.0805822	-0.0175412	0.136674	0.0534714	0.039988	-0.00226165	0.259062	0.0842802	0.188778	0.283292	0.412278	0.421913	0.0632999	0.144108	0.185357	0.195455	-0.00599069	0.205642	0.13493	0.234632	0.235209	0.0566698	0.113746	0.310857
ABCB6	-0.0427795	-0.157723	-0.177025	0.138333	-0.107677	-0.0687556	-0.178376	-0.134141	-0.0491286	-0.0732157	-0.196455	-0.252373	-0.0875259	-0.454927	-0.258196	-0.585372	-0.218439	-0.319177	-0.355078	-0.533279	-0.227481	-0.00529317	-0.0935866	-0.0523143	-0.239639	-0.0504572	-0.125582	0.0725626
ABCB7	0.133948	0.101754	0.218251	0.0343153	0.190264	0.354056	0.25055	0.367849	0.146816	0.0512576	0.0997378	0.0437278	0.117368	0.151343	-0.169322	0.206159	0.0678646	0.0780623	0.208727	0.102529	0.161692	0.184769	0.166096	0.238536	-0.106955	0.00633002	0.132103	0.245451
ABCB8	0.133844	0.329737	0.280992	0.0592584	0.175705	-0.0140001	0.698457	0.0714856	0.0809738	0.0852365	0.12039	0.191585	0.0638668	0.154873	-0.021212	0.124578	0.133547	0.133678	0.077917	0.123785	0.118814	0.225301	0.402601	0.012296	0.339592	0.405538	0.276707	0.0934047
ABCB9	-0.302872	-0.211621	-0.0720554	-0.322467	-0.355078	-0.491132	-0.731874	-0.321671	-0.377951	-0.580922	-0.57473	-0.959556	-0.683463	-0.560501	-0.352701	-0.714977	-0.161212	-0.182263	-0.0489334	-0.531586	-0.638047	-0.476572	-0.194618	0.186946	0.103277	-0.28013	-0.383167	-0.669985
ABCC1	-0.176681	-0.284964	-0.238796	-0.163236	-0.0310296	-0.273962	-0.260966	-0.120769	-0.3771	-0.201644	-0.530173	-0.342335	-0.446594	-0.198037	-0.641751	-0.51889	-0.525875	-0.681487	-0.509478	-0.547666	-0.405726	-0.372155	-0.332907	-0.537377	-0.444152	-0.628012	-0.463794	-0.474833
ABCC10	-0.556436	-0.695968	-0.605806	-1.09955	-0.351037	-0.550082	-0.765821	-0.643564	-0.684	-0.495156	-0.47085	-0.671032	-0.723063	-0.623868	-0.632727	-0.301143	-1.27212	-0.662632	-0.28568	-0.508831	-1.0124	-0.878819	-0.469143	-0.664742	-0.405254	-0.444331	-0.225233	-0.291628
ABCC12	0.430336	0.549323	0.246502	0.325733	0.447983	0.315612	0.177424	0.132754	0.349902	0.367849	0.302972	0.354868	0.311784	0.280152	0.21621	0.202355	0.219937	0.142823	0.151751	-0.0513782	0.0796715	0.104649	0.0662704	0.0347275	0.267185	0.132103	0.0560988	-0.129678
ABCC2	-0.202913	-0.240171	-0.421177	-0.467447	-0.280441	-0.311812	-0.302137	-0.550729	-0.352106	-0.355767	-0.370986	-0.410835	-0.37111	-0.36302	-0.304625	-0.374166	-0.587097	-0.421356	-0.435507	-0.173502	-0.608056	-0.514429	-0.559217	-0.368391	-0.55521	-0.532292	-0.175264	-0.549403
ABCC3	-0.19102	-0.46329	-0.263072	-0.188362	-0.323994	-0.302358	-0.0778677	-0.451909	-0.358758	-0.130916	-0.246645	-0.0950994	-0.356542	-0.389845	-0.355078	-0.439036	-0.471647	-0.259762	-0.162985	-0.39945	-0.493822	-0.329252	-0.411478	-0.251981	-0.305404	-0.394474	0.031478	-0.257047
ABCC4	-0.306299	-0.273196	-0.405254	-0.253834	-0.444732	-0.28033	-0.348049	-0.285232	-0.32496	-0.35892	-0.380752	-0.357471	-0.424916	-0.355899	-0.253966	-0.290878	-0.270525	-0.165601	-0.282773	-0.198205	-0.406278	-0.147847	-0.565011	-0.432029	-0.342694	-0.314934	-0.28576	-0.556436
ABCC5	-0.292333	-0.557835	-0.312703	-0.313667	-0.258709	-0.163754	-0.370875	-0.203616	-0.164619	-0.246067	-0.524108	-0.18393	-0.349501	-0.172502	-0.227775	-0.266708	-0.310356	-0.324266	-0.426597	-0.255245	-0.372465	-0.232059	-0.328131	-0.262029	-0.342824	-0.410973	-0.22355	-0.396567
ABCC6	-0.443485	-0.376387	-0.46609	-0.382564	-0.526886	-0.286351	-0.426045	-0.381943	-0.252597	-0.292333	-0.310967	-0.373675	-0.251414	-0.30045	-0.465106	-0.406021	-0.345553	-0.347897	-0.370459	-0.443485	-0.584947	-0.357971	-0.519112	-0.604053	-0.558933	-0.501781	-0.833997	-0.403269
ABCC6P1	-0.549861	-0.585967	-0.667578	-0.474484	-0.626361	-0.445882	-0.435022	-0.531173	-0.684588	-0.807381	-0.766358	-0.584262	-0.593116	-0.774984	-0.543828	-0.876145	-0.693515	-0.688614	-0.625472	-0.461645	-0.763152	-0.459819	-0.481123	-0.51602	-0.763439	-0.615504	-0.521583	-0.592857
ABCC6P2	-0.0364031	0.0369798	-0.00873828	0.0430083	0.378686	-0.0110035	0.0267879	0.0633454	0.153803	-0.0963935	-0.1111	-0.0187026	0.0053995	-0.324688	-0.203185	0.00223956	-0.123643	0.0466697	0.0757816	0.00369691	0.0278597	-0.216982	0.178337	0.146935	0.0482361	-0.023906	0.134104	-0.131997
ABCC8	0.398444	0.655833	0.678533	0.675832	0.737274	0.456924	0.550927	0.293614	0.480979	0.470085	0.436855	0.446175	0.589713	0.108253	0.224882	0.245767	0.290357	0.337382	0.0330584	-0.112478	0.07027	0.271547	0.321092	0.21927	-0.023906	0.512086	0.441668	0.301847
ABCC9	-0.911604	-0.760435	-0.856608	-0.889401	-0.804932	-1.25689	-1.0124	-1.22586	-1.05778	-0.949549	-0.944902	-1.1376	-1.38764	-1.26552	-1.00489	-1.13939	-1.12055	-1.0826	-1.25859	-1.11135	-1.27729	-1.26036	-1.28472	-1.54291	-1.20562	-1.19977	-1.31857	-1.30411
ABCD1	-0.108201	-0.0466056	0.0355574	-0.0463179	-0.139344	-0.154048	-0.188566	-0.198205	-0.332664	-0.282773	-0.140446	-0.393303	-0.345417	-0.364808	-0.380752	-0.2198	-0.493822	-0.156603	-0.206466	-0.293485	-0.290481	-0.397941	-0.254168	-0.388727	-0.27838	-0.41977	-0.592476	-0.274133
ABCD3	-0.541924	-0.261046	-0.407005	-0.189745	-0.512302	-0.322467	-0.449549	-0.425552	-0.327615	-0.447702	-0.286272	-0.467447	-0.32732	-0.311602	-0.551759	-0.397176	-0.366333	-0.400786	-0.424093	-0.433803	-0.38401	-0.478617	-0.334863	-0.483775	-0.469591	-0.325711	-0.480184	-0.281315
ABCD4	-0.431106	-0.618022	-0.79054	-0.600962	-0.364808	-0.464431	-0.640281	-0.432672	-0.503539	-0.600427	-0.584947	-0.582947	-0.841613	-0.307992	-0.480823	-0.614589	-0.635545	-0.61528	-0.53171	-0.623868	-0.561441	-0.432964	-0.444331	-0.398463	-0.45292	-0.56615	-0.658474	-0.767022
ABCE1	0.0456431	-0.0562077	-0.112533	-0.0992401	-0.000737155	0.119686	-0.137438	-0.223796	0.0538632	-0.0343123	-0.0158615	-0.0405477	-0.1314	0.00335144	-0.153609	0.00839893	-0.0997829	0.0697974	0.060725	0.0221547	-0.0944269	-0.0818177	-0.128345	0.144041	0.0861676	0.0182601	-0.156176	-0.160308
ABCF1	-0.613572	-0.555975	-0.534245	-0.322842	-0.626581	-0.478463	-0.370765	-0.638047	-0.423646	-0.429805	-0.413039	-0.553516	-0.253142	-0.725412	-0.525022	-0.426919	-0.165308	-0.397941	-0.45292	-0.501405	-0.491515	-0.38401	-0.32025	-0.260364	-0.443219	-0.240078	-0.182263	-0.369939
ABCF2	-0.0220286	-0.255765	-0.0645704	-0.0598874	-0.552311	-0.126008	0.0174211	-0.174501	-0.188217	0.228628	-0.0249204	0.0214107	0.0833742	0.188393	0.152857	0.296223	0.00642939	0.223847	0.341532	0.180166	0.246502	0.207623	-0.0883039	-0.220543	0.536981	0.238029	0.243098	0.214983
ABCG1	0.179364	0.155491	0.0932806	0.0943027	-0.061367	0.0542655	0.11497	0.0498725	0.200713	0.176579	0.112913	0.119514	0.206227	0.20383	0.108807	0.0560988	0.250397	0.108307	0.0142269	0.0509541	0.118904	0.190671	0.0982711	-0.017822	0.12501	0.117642	0.175826	0.205383
ABCG2	-0.230913	-0.20408	-0.535999	-0.789222	-0.338171	-0.544347	-0.506251	-0.646098	-0.399558	-0.445254	-0.32732	-0.136632	-0.888175	-0.341975	-0.253713	-0.252701	-0.368862	-0.447019	-0.253834	-0.438901	-0.315277	-0.289017	-0.383889	-0.126215	0.031103	0.102264	-0.307655	-0.174501
ABCG4	-1.02084	-0.860017	-0.839082	-0.812607	-0.855865	-0.981996	-0.770672	-0.761151	-0.959156	-1.15731	-1.03078	-0.889757	-1.15312	-0.871646	-1.09572	-0.852989	-1.26265	-1.25312	-1.49401	-1.2388	-1.18592	-1.20562	-1.16646	-1.21542	-1.33363	-1.30282	-1.31465	-1.44121
ABCG5	0.209423	0.0712946	-0.118879	-0.0598389	0.301939	0.151052	0.058711	0.0816736	0.268361	0.0378852	0.284955	0.084594	-0.373338	0.0343622	-0.0519068	0.174869	0.0496906	0.189081	0.157179	0.0800271	0.0134975	-0.01017	-0.122531	-0.0393257	0.358128	0.170993	0.110256	0.0729848
ABCG8	-0.0618438	-0.00189027	0.00759002	0.0277454	-0.0277439	-0.170888	-0.0475658	0.153856	-0.0146654	0.0327909	-0.00992047	-0.0863632	-0.0118553	-0.150374	-0.0505857	-0.0445281	-0.0490055	-0.181154	-0.0669222	-0.127357	0.0214107	0.00532757	-0.110584	0.156172	-0.0630536	0.0405986	0.00309232	-0.119889
ABHD10	-0.5532	-0.527332	-0.682159	-0.810442	-0.579221	-0.636771	-0.716956	-0.781077	-0.674129	-0.6161	-0.689911	-0.554969	-0.625241	-0.70152	-0.771346	-0.652505	-0.788513	-0.571153	-0.710618	-0.380752	-0.5453	-0.605806	-0.565438	-0.624982	-0.743701	-0.623074	-0.71106	-0.303313
ABHD12	0.0265613	-0.0234397	-0.172375	-0.163064	-0.140519	0.105948	-0.231547	-0.210812	0.111534	0.248546	0.160794	0.065624	-0.179109	0.143974	0.0940965	0.238839	-0.113462	-0.00165887	0.101218	-0.191672	-0.226866	-0.100604	-0.151138	-0.0964607	-0.100149	-0.199694	-0.396434	-0.0169903
ABHD12B	-0.521407	-0.872674	-0.593987	-1.44121	-1.14789	-1.07776	-1.5795	-1.18193	-0.856608	-0.47934	-1.46521	-0.997241	-1.25943	-0.969823	-1.32593	-1.26756	-1.27729	-1.02696	-1.20067	-1.03312	-0.947531	-1.19126	-1.48822	-1.40901	-1.18367	-1.32091	-1.33085	-1.28806
ABHD13	-0.255434	-0.400921	-0.0806427	-0.238449	-0.261229	-0.469143	-0.262352	-0.599576	-0.466861	-0.350398	-0.438767	-0.459288	-0.151138	-0.647518	0.033859	-0.235507	-0.266575	-0.2451	-0.104572	-0.301478	-0.182465	-0.504414	-0.814509	-0.21129	-0.47085	0.0852365	-0.198505	-0.108416
ABHD14B	0.136462	0.642661	0.792402	0.0334578	0.320757	0.635175	0.333752	0.193686	0.282722	0.627771	0.335848	0.662804	0.776376	0.682286	0.192565	0.753967	0.566301	0.643694	0.415661	0.744814	0.55646	0.530629	0.669625	0.460654	0.559853	0.546613	0.697764	-0.20096
ABHD16B	-0.999947	-0.537943	-0.473139	-0.491845	-0.561178	-0.833605	-0.588167	-0.541742	-0.591544	-0.70039	-0.354816	-0.776361	-0.688614	-0.92215	-0.839927	-0.756464	-1.06054	-0.860483	-0.953434	-0.814064	-0.938975	-1.03774	-1.04518	-0.848804	-1.02084	-0.848804	-1.03506	-0.775648
ABHD17A	0.0910308	0.130159	0.0365322	0.050148	0.0483949	0.0918842	0.059902	-0.00234752	0.171659	0.114286	0.247578	0.19341	0.128707	0.181569	0.169822	0.238182	0.189408	0.132932	0.188393	0.0600311	0.0926252	0.0952889	0.0373638	0.171522	0.0111651	-0.123908	0.050148	-0.0552422
ABHD17B	-0.111386	-0.223796	-0.13076	0.0188598	-0.00329868	-0.134723	-0.0450014	-0.000396373	-0.256133	0.0394237	-0.0692341	0.0380856	-0.0970393	0.0706197	0.0404106	-0.183223	-0.295142	-0.132638	0.0708286	0.051128	-0.324381	-0.40854	-0.234875	-0.375246	-0.102849	-0.193297	-0.184227	-0.245809
ABHD17C	-0.600014	-0.589609	-0.361448	-0.817739	-0.939522	-0.641751	-0.660741	-0.622827	-0.465938	-0.307131	-0.365568	-0.667075	-0.358758	-0.986752	-0.481123	-0.551759	-0.239884	-0.175525	-0.226321	-0.433123	-0.134406	-0.436831	-0.604053	-0.834477	-0.128868	-0.0667927	-0.17213	-0.138979
ABHD18	-1.59614	-1.5177	-1.74926	-1.52045	-1.36747	-1.5177	-1.56785	-1.28203	-1.25943	-1.44365	-1.43517	-1.46521	-1.55268	-1.05175	-1.27971	-1.6373	-1.31465	-1.2646	-1.39959	-1.60171	-1.3489	-1.15312	-1.2037	-0.952369	-1.2388	-1.33879	-0.873798	-1.31715
ABHD2	0.51326	0.383907	0.326521	0.280504	0.451567	0.300244	0.308287	0.426902	0.16483	0.237579	0.264187	0.314312	0.3403	0.322089	0.288102	0.242931	0.213148	0.145717	0.280626	0.215069	0.326882	0.213203	0.328746	0.288296	0.300396	0.175877	0.177341	0.106614
ABHD3	-0.6981	-0.659739	-1.0091	-0.934955	-0.719812	-0.787697	-1.10826	-0.907718	-1.13829	-0.927842	-0.720483	-0.773239	-0.914322	-1.07298	-0.997241	-0.89327	-1.17016	-0.690516	-0.79507	-0.929817	-0.730212	-0.864298	-0.680512	-0.733741	-0.811846	-1.13455	-0.996618	-0.812607
ABHD4	-0.152227	-0.223008	-0.293387	-0.339574	-0.255654	-0.242954	-0.224131	-0.354363	-0.117011	-0.149319	-0.363981	-0.331817	-0.201051	0.00638837	-0.181075	-0.266934	-0.136931	-0.301931	-0.218439	-0.267785	-0.315501	-0.238547	-0.233561	-0.27145	-0.201455	-0.273661	-0.406553	-0.249565
ABHD5	-0.617508	-0.626581	-0.734063	-0.549577	-0.601707	-0.738482	-0.0319184	-0.760084	-0.527217	-0.547666	-0.274133	-0.431576	-0.526064	-0.315655	-0.58371	-0.526886	-0.702856	-0.723063	-0.383167	-0.470362	-0.613325	-0.699535	-0.675359	-0.497564	-0.767022	-0.483214	-0.724918	-0.566741
ABHD8	0.169432	-0.0268859	-0.162093	0.100077	-0.26157	0.0756843	-0.0245688	0.0493689	-0.0477176	-0.0110035	-0.174834	-0.174753	-0.0429623	-0.0998724	-0.00911974	0.270896	0.15198	0.27204	0.219862	0.215959	-0.136045	-0.0461392	-0.16092	0.0352548	0.061788	0.168161	0.309833	0.202042
ABI1	-0.710262	-0.795999	-1.0922	-0.622827	-0.670777	-0.828133	-0.946864	-0.601482	-0.705378	-0.742382	-1.11891	-0.923144	-1.02618	-0.829526	-1.11789	-0.888818	-1.01373	-0.714215	-0.770957	-0.86749	-1.00489	-0.775648	-1.12856	-1.09955	-0.929817	-0.926406	-0.77214	-1.14789
ABI2	-0.108263	-0.507167	-0.436341	-0.431725	-0.570055	-0.38476	-0.567887	-0.411905	-0.420063	-0.421484	-0.184003	-0.521792	-0.392219	-0.182809	-0.175683	-0.117087	-0.1666	-0.176371	-0.112354	0.00753055	-0.185682	-0.0592049	-0.181499	-0.0364729	-0.0314817	-0.0648073	0.142586	0.0653324
ABI3	-0.177359	-0.20055	-0.339182	-0.245012	-0.106421	-0.053443	-0.0758837	0.139411	-0.373338	-0.460304	-0.484787	-0.368275	-0.386017	-0.0245004	-0.295768	-0.506083	-0.0870842	-0.376689	-0.172597	-0.0131836	-0.102537	-0.128005	-0.0559219	-0.0484485	-0.0527072	-0.0482539	-0.126531	-0.141114
ABI3BP	0.0862304	0.0284356	-0.0115295	0.0526189	0.0298363	0.0562516	0.0538632	0.101168	-0.0890672	0.0752411	0.00314461	0.126809	-0.0743534	-0.0540232	-0.0217372	-0.147598	0.0295417	0.0418268	-0.122612	-0.0809775	-0.0400804	0.045709	-0.0244335	-0.157011	-0.120095	-0.0882192	0.101498	-0.0942346
ABL1	0.283011	0.328407	0.155559	0.0659794	0.473552	0.318972	0.365081	0.289523	0.359096	0.266763	0.275091	0.372687	0.448695	0.422451	0.394691	0.264117	0.185757	0.197022	0.0829656	0.334556	0.143872	0.266086	0.292022	0.294628	0.215618	0.235008	0.321968	0.157338
ABL2	-0.183666	-0.0562943	-0.0514683	-0.144684	-0.0169903	0.0157279	-0.155188	-0.109653	-0.137676	-0.0098729	-0.377409	-0.0921623	-0.0289788	0.100457	-0.115704	-0.0705004	-0.355376	-0.0287351	-0.335697	-0.19781	0.202355	0.191329	0.128762	-0.435827	0.167277	0.0278597	0.00638837	-0.241921
ABLIM1	0.47763	0.397299	0.552873	0.632168	0.505047	0.539271	0.371639	0.557737	0.932352	0.6165	0.721435	0.835801	0.972612	1.02325	1.13171	0.914324	0.862853	0.98456	0.855687	0.96917	0.812461	0.896431	0.987307	0.797236	0.974229	0.754838	0.89475	0.911018
ABLIM2	0.205642	0.403501	0.288497	0.523332	-0.00775402	0.218027	0.418949	0.0530256	0.368923	0.233998	0.329737	0.222095	0.444194	0.27059	0.487253	0.777337	0.890749	0.756819	0.680203	0.51597	0.270896	0.396097	0.47763	0.352359	0.541942	0.39005	0.226373	0.350019
ABLIM3	0.831433	0.420849	0.817563	1.08097	0.630117	0.672946	0.914324	1.72337	0.953906	0.25394	0.690888	0.804208	0.688973	0.81886	0.631046	0.797236	1.20175	0.952158	0.920187	0.746466	1.07632	1.12147	0.967042	0.812461	1.25561	0.855687	0.998023	1.11648
ABR	-0.0432936	-0.135076	-0.111177	-0.0573582	-0.0544692	-0.0140608	0.017523	0.0366455	0.176212	0.0142885	0.0469427	0.134838	0.00487875	0.0762503	-0.0952655	-0.0292197	0.0258819	0.123182	0.0261466	-0.00451104	0.046337	0.154176	-0.0170517	0.230267	-0.0997829	0.0611505	0.190413	0.182886
ABRACL	-0.832555	-0.787697	-0.688858	-0.734615	-0.609689	-0.728488	-0.437271	-0.974744	-1.02744	-0.7121	-0.904379	-0.797445	-0.804932	-1.07358	-1.02815	-0.812607	-1.41224	-1.08849	-0.883659	-0.873351	-1.00425	-1.14789	-1.33085	-1.49713	-1.05623	-0.91831	-1.2378	-1.15731
ABT1	-0.475662	-0.353203	-0.4686	-0.420386	-0.379698	-0.488543	-0.274042	-0.461786	-0.508471	-0.528071	-0.435507	-0.613857	-0.541742	-0.819427	-0.690745	-0.541089	-0.693233	-0.570723	-0.541492	-0.808238	-0.65474	-0.793243	-0.58726	-0.682688	-0.786272	-0.563539	-0.649807	-0.380886
ABTB1	0.548564	0.636964	0.431986	0.430748	0.318363	0.366531	0.700398	0.724955	0.655833	0.631046	0.570344	0.862853	0.810131	0.870337	0.699279	0.897538	0.817563	0.836987	0.636964	0.751103	0.760583	0.891811	0.752752	0.559853	0.879923	0.76163	0.621073	0.706875
ABTB2	0.410836	0.279268	0.238449	0.201189	0.221783	0.327686	0.151475	0.322294	0.261133	0.315811	0.259318	0.244534	0.285391	0.213923	0.370294	0.259318	0.335534	0.3319	0.199019	0.460654	0.28611	0.347434	0.373088	0.409094	0.334556	0.261058	0.475038	0.266945
ACAA1	0.336897	0.201753	0.394519	0.369992	0.344506	0.35783	0.165566	0.156043	0.343192	0.282923	0.374619	0.340641	0.238699	0.350019	0.435325	0.36971	0.398444	0.278316	0.349902	0.341913	0.473828	0.268361	0.474832	0.561994	0.389102	0.341082	0.380547	0.407545
ACAA2	-0.540488	-0.733118	-0.5532	-0.658705	-0.457215	-0.566359	-0.612128	-0.401064	-0.566936	-0.913181	-0.860887	-1.00988	-0.903327	-0.431106	-0.894496	-0.825959	-0.873798	-1.0405	-0.710869	-0.651928	-0.778355	-0.755139	-0.655588	-0.805284	-0.570923	-0.7456	-0.943166	-0.759166
ACACA	-0.045524	-0.0564555	-0.0796379	-0.0888542	-0.177847	-0.0720554	-0.105081	0.0797302	-0.0714741	-0.0441954	-0.170261	0.00319944	-0.0950994	-0.188909	-0.137599	-0.0113042	-0.145879	-0.070155	-0.0867064	0.0495746	-0.0887628	0.0289178	-0.106128	-0.0992401	-0.0426601	0.0319568	0.103142	-0.123743
ACACB	0.0776043	-0.271546	-0.292213	-0.0706439	0.00741039	-0.0600068	-0.346486	-0.03265	0.136268	-0.134233	-0.107024	0.265399	0.0475229	0.339861	0.227727	-0.0604478	0.096257	0.145009	0.144823	-0.0316366	0.0444628	0.236774	0.143182	-0.0595568	-0.0447313	0.105168	-0.397941	0.0483949
ACAD10	0.860196	0.874943	0.89475	0.699279	0.772068	0.778295	0.627235	0.649686	0.783536	0.650892	0.660458	0.860196	0.877075	0.713385	0.73816	0.600414	0.502255	0.341913	0.383228	0.40209	0.453931	0.542941	0.5136	0.374619	0.526277	0.407689	0.347434	0.403501
ACAD11	0.386322	-0.0358134	-0.328822	-0.211446	-0.0590057	-0.434527	-0.14078	-0.254168	0.221783	-0.0489334	-0.152904	-0.0736307	0.219937	0.0257042	0.430748	0.0267265	0.0619529	0.188661	-0.230913	-0.0896097	-0.0961157	0.188266	0.0383721	-0.25087	0.411678	0.419341	0.165511	0.341532
ACAD8	-0.181424	-0.300349	-0.0452705	0.0289178	-0.00569944	-0.16392	-0.015691	0.105391	-0.104912	0.0188598	-0.00841404	0.0621948	0.103636	0.00466702	0.128256	0.0365322	-0.0348597	0.208305	0.137262	-0.0156335	-0.00605545	0.0247622	0.128929	0.255403	0.0757816	0.236146	0.0706197	0.11912
ACAD9	-0.256213	-0.0831205	-0.139209	-0.0667927	-0.166859	-0.14151	-0.194156	-0.103711	-0.0946922	-0.194747	-0.115061	-0.187644	-0.119276	-0.250969	-0.301607	-0.215347	-0.143025	-0.0970393	-0.159656	-0.115773	-0.0463803	-0.0776746	-0.179388	-0.248978	-0.19556	-0.176371	-0.0920049	-0.0861756
ACADM	0.425077	0.547631	0.638316	0.750454	0.438905	0.495802	0.39777	0.443639	0.443454	0.498094	0.653642	0.545417	0.429046	0.690272	0.722356	0.823792	1.02148	0.7995	1.02325	0.890749	0.628301	1.01488	0.685251	1.04549	0.85836	0.825189	1.46436	0.88303
ACADS	-0.324121	-0.378188	-0.230394	-0.328033	-0.566936	-0.382564	-0.227775	-0.37009	-0.346823	-0.479682	-0.406404	-0.386117	-0.442296	-0.453875	-0.492211	-0.430192	-0.506749	-0.377409	-0.470527	-0.636995	-0.134083	-0.477305	-0.33859	-0.045744	-0.330327	-0.512948	-0.206466	-0.336718
ACADSB	-0.53101	-0.32328	-0.437394	-0.155938	-0.213669	-0.396434	-0.372365	-0.193875	-0.372365	-0.393717	-0.231113	-0.172836	-0.318632	-0.223464	-0.261229	-0.300034	-0.374061	-0.485137	-0.421484	-0.320973	-0.5329	-0.350398	-0.244191	-0.0639473	-0.280864	-0.26841	-0.250969	-0.213819
ACADVL	-0.0746559	-0.0847268	-0.197417	0.109893	-0.199794	-0.188362	0.00516299	-0.324381	-0.0971565	-0.247683	-0.348268	-0.270248	-0.368862	-0.459097	0.121928	-0.0492924	0.0501899	0.138883	0.0674655	-0.283964	0.0124701	0.150134	-0.164545	-0.207693	-0.0827916	-0.120474	-0.0983366	-0.0188951
ACAN	0.493469	0.274778	0.379209	0.099889	0.314656	0.400077	0.240078	0.462341	0.275987	0.139339	0.172473	0.199019	0.276888	0.313797	0.15771	0.196431	0.254738	0.0956394	0.289195	0.261406	0.431141	0.197942	0.107702	0.183231	0.294849	0.211019	0.192109	0.162748
ACAP1	0.401745	0.636372	0.602721	0.312578	0.776376	0.776376	0.546162	0.806561	0.626579	0.622821	0.527602	0.439918	0.440544	0.418234	0.313615	0.362045	0.246202	0.310759	0.424918	0.435325	0.573744	0.412684	0.38493	0.324953	0.315943	0.25717	0.373893	0.555105
ACAP2	0.00642939	-0.0507079	0.00265502	-0.053707	-0.109286	-0.178843	-0.111315	-0.0683517	-0.118488	-0.027936	-0.191294	-0.190695	-0.125829	-0.442157	0.232011	-0.114483	-0.211446	-0.259535	-0.116589	-0.239884	-0.180309	-0.0546404	-0.150454	-0.144388	-0.176204	-0.213016	-0.0629982	-0.303854
ACAP3	0.682286	0.495062	0.460919	0.572978	0.40209	0.753967	0.474252	0.541942	0.566849	0.44708	0.494302	0.697764	0.498476	0.506153	0.496679	0.640951	0.525595	0.59369	0.516409	0.636372	0.50523	0.522497	0.55908	0.51801	0.683666	0.431319	0.366753	0.189155
ACAT2	-2.02436	-2.32599	-2.26418	-1.95037	-1.89325	-2.09179	-2.31321	-1.95037	-1.98133	-2.18584	-1.68435	-1.91241	-1.36897	-1.92471	-1.43939	-1.74514	-1.94339	-2.06711	-2.03212	-1.54675	-1.94339	-2.11559	-2.19467	-2.32599	-2.15883	-2.21518	-1.91241	-2.05902
ACBD3	-0.231437	0.187299	0.144225	0.0134376	-0.0396079	0.0651051	-0.130697	0.0350308	0.00394139	0.0451016	0.145513	0.138399	-0.00970996	-0.0301398	-0.104709	0.101616	-0.102781	0.0494309	-0.133202	0.0510066	-0.0215163	0.0164293	0.0128284	0.0263989	0.129233	0.0184932	0.206227	-0.051597
ACBD4	0.325222	0.62223	0.709311	0.520453	0.549789	0.387687	0.446175	0.668332	0.475038	0.342583	0.665273	0.505878	0.514625	0.515405	0.581125	0.384728	0.43414	0.363972	0.450482	0.480979	0.438905	0.423081	0.53555	0.521107	0.2891	0.266763	0.280815	0.660458
ACBD5	-0.600188	-0.563539	-0.852989	-0.63359	-0.594549	-0.441805	-0.763152	-0.775648	-0.486983	-0.784633	-0.538167	-0.625472	-0.569653	-0.392092	-0.720483	-0.656193	-0.443987	-0.423417	-0.745343	-0.564139	-0.7356	-0.638761	-0.581209	-0.542398	-0.586443	-0.638047	-0.625886	-0.512135
ACBD6	-1.43414	-1.35756	-1.32091	-1.20973	-1.16535	-1.2378	-1.32091	-1.02618	-1.21196	-1.33196	-1.33879	-1.26374	-1.56295	-1.11297	-1.32485	-1.60781	-1.3818	-1.56295	-1.71251	-1.53622	-1.53037	-1.33725	-1.43239	-1.55268	-1.57003	-1.73743	-1.66063	-1.60781
ACBD7	-0.393878	0.100338	-0.243909	-0.276983	-0.116395	-0.322842	-0.245896	-0.310443	-0.340834	-0.220239	-0.150608	-0.114483	-0.485657	-0.120163	-0.362625	-0.463096	-0.146359	-0.27145	0.0877657	-0.202531	-0.125256	-0.087417	-0.0966312	0.0768724	-0.61861	-0.443219	-0.258083	0.0524158
ACCS	0.187769	0.0967408	-0.128502	0.085136	0.229885	-0.0737552	-0.292938	-0.185756	-0.0816808	0.0153672	-0.0610726	0.0794048	0.0875069	-0.102357	-0.23164	0.158376	-0.263471	-0.139344	-0.182041	0.0562516	-0.126576	-0.0197443	-0.042724	-0.143448	-0.156603	-0.212172	-0.1802	-0.0489334
ACE2	0.326521	0.287857	0.199381	1.228	0.170863	0.293234	0.21927	0.208369	0.236469	0.110456	0.460424	0.371378	0.432142	0.275708	0.241633	0.451758	0.167579	0.831433	0.498094	0.627235	1.00019	0.537216	0.596744	0.621772	0.184362	1.21694	1.26788	0.521864
ACER2	-0.474173	-0.502742	-0.241208	-0.288801	-0.446881	-0.24734	-0.121326	-0.178148	0.29045	0.158376	-0.053707	-0.0562077	0.274022	-0.29821	-0.113401	-0.210956	-0.21356	-0.0406138	-0.0832436	-0.225233	-0.202154	-0.01788	-0.525875	0.0551594	0.0161969	-0.104346	-0.270248	-0.191128
ACER3	-0.496232	-0.409485	-0.482121	-0.519909	-0.441205	-0.608056	-0.641751	-0.638274	-0.621484	-0.832555	-0.622066	-0.52759	-0.690196	-0.638971	-0.40854	-0.636995	-0.608821	-0.438901	-0.672001	-0.583271	-0.187395	-0.34702	-0.479682	-0.352558	-0.438128	-0.42312	-0.548455	-0.571747
ACHE	-0.424256	-0.579453	-1.04905	-0.46242	-0.420573	-0.176059	-0.380657	-0.0716599	-0.325966	-0.576766	-0.52367	-0.643773	-0.391592	-0.279386	-0.310718	-0.842024	-0.306999	-0.349078	-0.758801	-0.324688	-0.624131	-0.414551	-0.580922	-0.154187	-0.732774	-0.505537	-0.454652	-0.760832
ACKR1	0.382331	0.478972	0.452641	0.253308	0.351907	0.535126	0.873495	0.424918	0.537528	0.662804	0.416248	0.432527	0.483754	0.39366	0.627771	0.331995	0.569072	0.289861	0.401085	0.326882	0.401234	0.409753	0.205383	0.343708	0.225636	0.394519	0.152211	0.234706
ACKR2	-0.508656	-0.408421	-0.36644	-0.399558	-0.350398	-0.552737	-0.661869	-0.496564	-0.72134	-0.452599	-0.486542	-0.511067	-0.756464	-0.556199	-0.445628	-0.70152	-0.464431	-0.438128	-0.636771	-0.647272	-0.641296	-0.6981	-0.600427	-0.572468	-0.616246	-0.503539	-0.464297	-0.602707
ACKR3	0.34097	0.172335	0.0646193	0.132628	0.168862	0.19931	0.238699	0.307116	0.236948	0.187699	0.27698	0.22664	0.126718	0.0378852	0.244045	0.156387	0.0951199	0.189016	0.148125	0.198254	0.248546	0.261895	0.409094	0.309047	0.413664	0.244534	0.101544	0.285515
ACMSD	0.261895	0.265705	0.217877	0.231531	0.252707	0.183825	0.211019	0.26154	0.189922	0.157031	0.185213	0.12931	0.186112	0.181199	0.249548	0.154356	0.214073	0.149494	0.163782	0.180435	0.184421	0.168696	0.112777	0.156043	0.179702	0.122942	0.0597407	0.221281
ACO1	-0.124728	-0.362393	-0.367328	-0.236512	-0.281856	-0.265522	-0.349373	-0.324121	-0.254485	-0.225608	-0.319036	-0.203096	-0.133202	-0.207543	-0.240078	-0.31581	-0.185869	-0.134406	-0.416683	-0.167643	-0.193366	-0.114421	-0.129509	0.00522726	-0.111646	-0.153293	-0.203185	-0.315501
ACOT11	-0.27145	-0.0986181	-0.194938	-0.185254	-0.0495768	-0.0387432	-0.0479622	-0.224709	0.0269676	-0.252278	-0.0804951	-0.160525	-0.0839934	0.0546541	-0.167157	-0.135076	-0.133134	-0.292213	-0.0739571	-0.216148	0.164124	0.11513	0.143252	-0.188018	0.179243	-0.160985	-0.0837269	0.119686
ACOT12	-0.691564	-0.775351	-0.801927	-0.510872	-0.450251	-0.516791	-0.343343	-0.37467	-0.542777	-0.578785	-0.611188	-0.579453	-0.925786	-0.453399	-0.464956	-0.440369	-0.520561	-0.666504	-0.610699	-0.658705	-0.759781	-0.54634	-0.606495	-0.54821	-0.627739	-0.612904	-0.426454	-0.580339
ACOT13	0.22941	0.121807	0.122942	0.117826	0.35629	0.188841	0.131718	0.263773	0.134104	0.0605321	0.131006	0.0179158	0.0842802	-0.127525	-0.0707662	-0.119224	-0.129278	-0.124365	-0.146503	-0.316043	0.0234768	-0.102357	-0.0255208	-0.177105	-0.155477	-0.121256	-0.0413307	-0.0171363
ACOT4	-0.455129	-0.592228	-0.32532	-0.42246	-0.292938	-0.50588	-0.546919	-0.56615	-0.783893	-0.436697	-0.593116	-0.633009	-0.761151	-0.574946	-0.35564	-0.710869	-0.498229	-0.44247	-0.784289	-0.820132	-0.582649	-0.592857	-0.642228	-0.573689	-0.511826	-0.644474	-0.57473	-0.815349
ACOT6	0.195853	-0.012234	0.22575	0.208504	0.265066	0.304075	0.0941777	0.175947	0.462959	0.194026	0.217648	0.256906	0.347323	0.291114	0.29025	0.348573	0.25055	0.206802	0.126001	0.200365	0.177001	0.180032	-0.0830574	0.262816	0.248478	0.261458	0.171602	0.289967
ACOT7	0.235455	0.141867	0.209423	0.137154	0.243928	0.183088	-0.0379547	0.151343	0.0890658	-0.0910203	0.0661472	0.0185907	-0.0376246	0.0129445	-0.0189592	-0.00834385	0.0417598	0.0221547	0.138937	0.165511	0.11553	0.163278	0.15087	0.0151804	0.177656	-0.0629488	-0.0463179	-0.146169
ACOT8	-0.612904	-0.547937	-0.447148	-0.311715	-0.488166	-0.559621	-0.126531	-0.450557	-0.445748	-0.293806	-0.316706	-0.236191	-0.0694573	-0.714738	-0.630297	-0.760435	-0.522186	-0.51375	-0.525022	-0.483214	-0.477946	-0.557129	-0.568184	-0.387001	-0.772884	-0.616829	-0.452755	-0.2977
ACOX1	-0.116068	-0.349874	-0.264313	-0.237449	-0.292213	-0.133777	-0.320126	-0.244274	0.164286	-0.24815	-0.281088	0.110256	0.152123	0.0839708	0.149812	0.141867	-0.0830574	-0.048764	-0.045524	0.0539781	-0.155991	-0.105591	-0.180108	0.0211533	-0.140945	-0.245581	-0.0497815	-0.061367
ACOX2	-0.107677	-0.288024	-0.0184035	-0.18913	-0.0404623	-0.126704	-0.152581	-0.0991806	0.0240708	-0.173869	-0.015691	-0.144909	-0.0977095	0.0424837	0.00936517	-0.0581465	-0.0778677	0.0755775	-0.0346866	-0.121527	-0.311812	-0.154187	-0.2255	-0.105215	-0.229549	-0.163853	0.0453165	-0.119158
ACOX3	-0.0975581	-0.111033	0.11769	0.107052	-0.0572096	-0.0637995	0.106874	0.12033	-0.09777	-0.0952655	0.00285215	-0.127861	-0.0740864	-0.0529596	0.00741039	0.0324785	-0.07469	-0.0121848	-0.112182	0.0732637	-0.0652577	-0.134799	-0.130211	-0.170888	-0.18484	-0.215498	-0.22674	-0.0723797
ACP1	0.044227	-0.0479622	-0.015178	0.0452169	-0.00687924	-0.176447	-0.050762	-0.139644	0.0542054	-0.0314817	-0.0856394	-0.0270696	-0.0785922	-0.0283545	0.00285215	0.120067	-0.12348	0.00664363	0.0363861	-0.0587491	-0.00815784	0.0515656	-0.0156335	-0.0356504	-0.0302034	0.221722	0.0407644	0.0533452
ACP5	0.135844	0.192373	0.22258	0.293405	0.17755	0.194489	0.380264	0.0456431	0.237674	0.185757	0.236556	0.219669	0.0413911	0.19711	0.186048	0.151418	0.15901	0.090713	0.13269	0.246362	0.203903	0.214165	0.144041	0.442446	0.101218	0.287006	0.370619	0.503857
ACP6	0.257991	0.808724	0.501457	0.499671	0.340868	0.375113	0.290949	0.51801	0.181138	0.213148	0.33141	0.373394	0.431532	0.326265	0.376297	0.358665	0.227584	0.317769	0.405145	0.256029	0.317769	0.208727	0.0498247	0.292565	0.223933	0.173086	0.315024	0.488064
ACPP	-2.21518	-2.38713	-2.32599	-2.27898	-1.93087	-2.0468	-0.458344	-1.78034	-2.24187	-2.13483	-1.11135	-2.25083	-2.12563	-1.96908	-2.05902	-1.39239	-1.77548	-1.77087	-0.52308	-1.43939	-1.32917	-1.62317	-1.54931	-1.47283	-1.60171	-1.50949	-1.42872	-1.23972
ACPT	0.169367	0.314312	0.130159	0.252707	0.147687	0.127918	0.239066	0.116812	0.193244	0.225212	0.217281	0.176435	0.246127	0.162335	0.240154	0.230095	0.254911	0.147578	0.182886	0.230095	0.210166	0.144823	0.248402	0.255314	0.19856	0.170433	0.0430083	0.27383
ACRBP	0.0844633	0.149237	0.129372	0.109363	0.131503	0.121998	0.195243	0.18092	0.0744633	0.208855	0.173294	0.0760404	0.231137	0.0592584	0.217587	-0.0118553	0.00142818	0.0857202	0.0368789	0.0653933	0.034035	0.0350308	0.0650351	0.139209	-0.0732976	0.0510066	0.0174705	0.041157
ACRC	0.162748	0.313482	-0.0295577	-0.335574	-0.0468441	0.288999	-0.159835	0.16497	0.0842802	-0.010284	0.293614	-0.0425864	-0.150608	0.0752411	0.366531	-0.157011	0.422849	-0.292444	0.0974072	0.177001	0.0221547	0.0171121	0.245354	0.059552	0.166935	0.0633454	-0.0908101	0.0596092
ACSF2	-0.546155	-0.445468	-0.510691	-0.714215	-0.739166	-0.680213	-0.822365	-0.635065	-0.726243	-0.541089	-0.760084	-0.547937	-0.669146	-0.67936	-0.817414	-0.85378	-0.633814	-0.497007	-0.852223	-0.674701	-0.656408	-0.649536	-0.557645	-0.789222	-0.920258	-0.636529	-0.689911	-0.81812
ACSF3	-0.00585521	0.0949204	0.00856902	0.177863	0.108307	0.00290458	0.0908363	-0.0277849	-0.0355871	0.06175	0.199019	0.0696587	0.0451016	0.0909711	0.0241952	0.0961019	0.217825	0.149062	0.0560988	0.0164293	0.0254986	0.092353	-0.0195024	0.0227952	0.114463	-0.00970996	-0.0582243	-0.0547046
ACSL1	0.788781	0.77453	0.407689	1.17658	0.760583	0.688973	0.356907	-0.0967654	1.55901	0.914324	0.769477	1.377	1.2978	0.604982	1.32967	1.01698	0.974229	1.63958	1.35151	1.33417	1.18084	1.16587	1.35151	0.98456	1.13352	1.18373	1.36486	1.08396
ACSL3	-0.258196	-0.316819	-0.2255	-0.494625	-0.294428	-0.319605	-0.574946	-0.503539	-0.649536	-0.571153	-0.318457	-0.373178	-0.514429	-0.5532	-0.384474	-0.336718	-0.382256	-0.27636	-0.407682	-0.406278	-0.438599	-0.465938	-0.502513	-0.59001	-0.437689	-0.370459	-0.581577	-0.690196
ACSL4	-0.227696	-0.102444	-0.183519	-0.459288	-0.186041	-0.357351	-0.222085	-0.29066	-0.396055	-0.164388	-0.209815	-0.261672	-0.315277	-0.257615	-0.392341	-0.137773	-0.549403	-0.393177	-0.148408	-0.369939	-0.360289	-0.238238	-0.102613	-0.391448	-0.332793	-0.370765	-0.341866	-0.318632
ACSL6	0.378872	0.304075	0.276707	0.270409	0.31032	0.377458	0.101544	0.327026	0.325097	0.147947	0.203903	0.28023	0.257096	0.269411	0.238992	0.26123	0.316711	0.31032	0.18795	0.307659	0.367662	0.173294	0.150495	0.0944384	0.11497	0.213281	0.0218731	0.130875
ACSM1	-0.211108	0.00956181	-0.0304836	-0.090259	-0.044593	-0.133916	-0.226218	-0.255351	-0.214728	-0.103316	-0.201143	-0.0435551	-0.223085	-0.289536	-0.206546	-0.0930554	-0.181154	-0.379843	-0.204939	-0.182693	-0.30427	-0.0781996	-0.263544	-0.513336	-0.16618	-0.219888	-0.61961	-0.256746
ACSM2A	0.0371825	-0.209815	-0.0512555	0.199072	0.0649162	0.270896	-0.0722469	0.236312	0.0608431	0.210244	0.198464	0.304913	0.214	-0.0276231	0.00851364	0.103827	0.282923	0.0858978	0.173015	0.377046	0.231224	-0.0773512	0.0240708	0.116136	0.0130206	0.0158852	-0.0875259	-0.335288
ACSM2B	-0.215674	-0.279256	-0.135466	-0.194005	-0.233195	-0.222276	-0.1666	-0.205398	-0.0645134	-0.197243	-0.146268	-0.055324	0.00271654	0.0409782	0.0515656	-0.0069464	-0.00942076	0.172865	-0.145053	-0.0364729	-0.0808236	0.0945192	0.0667319	0.228748	-0.183519	0.0383721	-0.0265642	-0.178222
ACSM3	0.275802	0.4456	0.240435	0.23108	0.43661	0.442197	0.328655	0.216384	0.0750586	-0.100846	-0.00580418	0.452419	0.140881	-0.0538393	0.171908	0.321223	0.2579	0.465043	0.34235	0.216443	0.150187	0.189362	0.548007	-0.102537	0.0678646	0.131323	0.18632	-0.0108351
ACSM5	0.0430083	-0.011385	0.133609	-0.130848	0.189487	-0.081463	-0.0495032	0.0355574	0.0807844	0.0437278	-0.0547046	-0.179846	0.15396	0.296011	0.0714026	0.0180655	0.419341	0.196431	0.323522	0.0563865	0.233323	0.18795	0.212448	0.12538	0.181333	0.267778	0.219862	0.134456
ACSM6	-0.988551	-0.937429	-1.1502	-0.879233	-0.857434	-0.900663	-1.21854	-0.754117	-0.814894	-0.854141	-1.05986	-1.23576	-0.996618	-0.69389	-0.937056	-1.09572	-1.12545	-1.02322	-1.36897	-1.19263	-0.764592	-0.680966	-0.678042	-0.958635	-0.958242	-1.04647	-0.961698	-1.12614
ACSS1	-0.314003	-0.260226	-0.335697	-0.215246	-0.318141	-0.39433	-0.258637	-0.209404	-0.269972	-0.293591	-0.236392	-0.28568	-0.296728	-0.395959	-0.351037	-0.353916	-0.482708	-0.278985	-0.418256	-0.418094	-0.136352	-0.123156	-0.273872	-0.245581	-0.380004	-0.182263	-0.337936	-0.177105
ACSS2	0.138138	-0.0465488	0.0619529	0.176579	0.1841	0.172537	-0.15872	0.0567506	0.0405479	-0.037147	0.234875	0.300929	0.0637489	0.329159	0.4323	0.0212223	0.164744	-0.0655215	0.00990315	0.158261	0.145891	0.0813391	0.104711	0.288497	0.118425	0.0752995	0.182236	0.200365
ACSS3	-0.441654	-0.450409	-0.38547	-0.406702	-0.440506	-0.386502	-0.34659	-0.500851	-0.477095	-0.466861	-0.338171	-0.512789	-0.40788	-0.551396	-0.451188	-0.484108	-0.532292	-0.396055	-0.519112	-0.405589	-0.515256	-0.512135	-0.460021	-0.605143	-0.593116	-0.37467	-0.518134	0.0970426
ACTA1	5.45392	5.45392	5.45392	6.08906	4.22702	4.88423	6.08906	4.22702	4.39109	5.45392	6.08906	4.22702	5.45392	5.45392	5.45392	5.45392	5.45392	5.45392	5.45392	5.45392	4.71788	5.45392	4.54825	4.88423	5.45392	5.45392	5.45392	5.45392
ACTA2	0.592435	0.431986	0.712588	0.663399	0.322294	0.324379	0.85836	0.443804	0.490133	0.475661	0.736176	0.50357	0.640316	0.542941	0.662804	0.616902	0.575995	0.604982	0.751103	0.551609	0.739151	0.827693	0.773729	0.635175	0.699279	0.800468	0.755902	0.747523
ACTB	-0.748965	-0.654009	-0.652853	-0.625241	-0.634018	-0.755892	-0.309113	-0.821436	-0.465106	-0.390021	-0.926406	-0.405073	-0.352106	-0.620905	-0.267884	-0.276536	-0.307655	-0.556882	-0.0451561	-0.508656	-0.578951	-0.347628	-0.410114	-0.345553	-0.413469	-0.428686	-0.282556	-0.562032
ACTC1	0.647579	0.645529	0.802991	0.504202	0.740316	0.614593	0.526968	0.207181	0.432142	0.626102	0.651407	0.643694	0.402601	0.588323	0.51326	0.451567	0.419886	0.412899	0.238592	0.516409	0.594767	0.527602	0.50357	0.672265	0.474041	0.588807	0.679032	0.517081
ACTG1	-1.07633	-0.563329	-1.04984	-0.679925	-1.05548	-1.22177	-0.335823	-1.26756	-1.32091	-0.789654	-0.414698	-1.61119	-1.17217	-1.17711	-1.41224	-1.04825	-1.32331	-1.2248	-0.832555	-0.944902	-1.35019	-1.2462	-1.43728	-1.35502	-1.41372	-1.21629	-1.02251	-1.21444
ACTG1P17	-0.147324	0.0471131	-0.0223501	-0.246645	0.207402	-0.214639	-0.176744	-0.117594	-0.0832436	-0.116589	-0.154048	-0.301143	-0.331691	-0.290984	-0.368548	-0.271059	-0.673434	-0.389562	-0.465796	-0.397834	-0.299899	-0.434087	-0.418256	-0.453875	-0.400175	-0.339432	-0.241001	-0.347139
ACTG2	3.71023	3.22555	3.55656	3.4722	3.40106	3.62488	3.33386	3.33386	3.28921	3.55656	3.28921	2.95443	3.18024	3.4722	3.55656	3.33386	2.90723	3.33386	3.40106	3.40106	2.75233	3.28921	2.6512	2.85941	3.07736	3.12383	3.18024	2.6512
ACTL6A	0.0413366	0.113431	-0.110001	-0.220635	-0.220864	-0.331186	-0.0306315	-0.224518	-0.2214	0.309242	0.330562	-0.296635	0.0245577	-0.123401	-0.0659763	-0.0620675	-0.715315	-0.318376	-0.20779	-0.385332	-0.255017	-0.182465	-0.37035	-0.297482	-0.937056	-0.228482	-0.332411	-0.363873
ACTL6B	0.298185	-0.00730094	0.0817929	0.157242	-0.0150288	-0.0188265	0.536722	-0.107677	0.042704	0.411451	0.367195	0.083705	0.0101873	0.44583	0.191646	0.385224	-0.076522	0.0585049	0.269062	0.311036	-0.275477	0.543816	0.245272	0.373542	0.262742	0.165811	0.473828	0.230095
ACTL7A	1.17658	1.32967	1.35887	1.58019	1.14453	1.13352	1.55901	0.987307	1.08396	1.32333	1.59196	0.935969	1.03888	1.28427	1.08705	1.19534	0.959932	0.991781	0.940685	1.14824	1.02523	0.972612	1.00019	0.991781	0.945715	0.967042	1.25561	1.1988
ACTL9	0.204293	0.0315944	0.291477	0.30701	0.139209	0.436855	0.105057	0.611464	0.100745	0.550927	0.234788	0.156457	0.170756	0.0540808	0.404338	0.143332	0.249847	0.173015	0.538164	0.13459	0.0436585	-0.172682	0.195357	0.227982	0.327686	0.344686	0.233827	0.252362
ACTN2	0.96917	2.13133	1.53547	1.80262	0.133276	0.752752	2.058	0.752005	1.1074	1.22005	2.08523	0.733091	1.52765	1.55202	1.39203	2.03829	1.4134	1.50547	1.78779	1.59196	1.06757	1.58019	1.53547	1.55202	2.13133	2.10702	2.10702	1.96017
ACTN3	0.462341	0.359403	0.661314	0.512086	0.73816	0.37997	0.47763	0.202355	0.390794	0.255001	0.233115	0.239507	0.140157	0.217877	0.26586	0.366047	0.33862	0.239133	0.316458	0.348573	0.679565	0.288576	0.352981	0.305097	0.485062	0.260483	0.263274	0.512667
ACTN4	-0.505122	-0.610942	-0.644474	-0.545696	-0.570302	-0.596738	-0.625886	-0.562965	-0.713469	-0.736695	-0.6837	-0.541924	-0.699778	-0.583271	-0.575364	-0.723063	-0.529338	-0.476742	-0.659739	-0.692699	-0.67597	-0.655128	-0.525446	-0.553366	-0.631274	-0.575594	-0.497564	-0.674445
ACTR10	-0.151468	-0.29918	-0.0326097	0.0575593	-0.0993945	-0.176816	-0.0876809	0.0391958	-0.0838405	-0.0556411	-0.0100587	-0.0654792	-0.0187598	-0.176	-0.161857	-0.119889	0.112724	-0.064754	-0.048881	-0.0959197	-0.0365394	-0.104634	0.0762503	0.140942	-0.01788	-0.0493786	0.107511	0.263378
ACTR1B	-0.788139	-0.856193	-0.867987	-0.850528	-0.74434	-0.756464	-0.906505	-0.840313	-1.09302	-0.838806	-0.838806	-0.781575	-1.06923	-0.628246	-0.66616	-0.75786	-0.639514	-0.720781	-0.662097	-0.824705	-0.844562	-0.913181	-0.724615	-0.845015	-0.99594	-1.085	-0.751397	-1.04584
ACTR2	-1.12674	-1.13939	-1.0875	-1.06993	-1.07712	-0.980339	-0.901604	-0.964666	-1.13119	-0.808544	-0.874298	-1.20469	-0.973401	-0.886794	-0.827065	-0.692081	-0.768373	-0.923819	-0.628425	-0.699271	-0.743924	-0.734615	-0.676845	-0.767339	-0.650284	-0.67258	-0.789654	-0.716043
ACTR3	-0.246233	-0.170389	-0.299107	-0.326859	-0.388611	-0.318931	-0.263681	-0.267528	-0.308362	-0.27213	-0.276264	-0.337284	-0.314827	-0.292333	-0.25988	-0.256559	-0.274042	-0.195726	-0.263072	-0.286906	-0.306424	-0.145349	-0.204757	-0.215674	-0.168918	-0.076394	-0.285957	-0.215246
ACTR3B	0.253027	0.205286	-0.00599069	0.143735	0.242853	0.212191	0.225368	0.197942	0.270517	0.162687	0.146875	0.292255	0.198167	0.310065	0.116812	0.27033	0.207571	0.194336	0.181935	0.330442	0.122677	0.274022	0.019636	0.0559855	0.190342	0.109363	0.0740785	-0.0673435
ACTR5	-0.189745	-0.0738865	-0.283184	-0.212416	-0.36451	-0.341866	-0.428515	-0.250458	-0.246067	-0.171913	-0.259978	-0.122459	0.0900671	-0.423417	-0.51889	-0.319605	-0.367027	-0.471824	-0.276168	-0.559433	-0.177278	-0.139287	-0.218262	-0.585372	-0.441654	-0.174753	-0.307445	-0.491845
ACTR6	-0.293806	-0.396055	-0.1418	-0.315277	-0.350798	-0.198927	-0.317913	-0.236677	-0.374409	-0.492022	-0.53171	-0.439036	-0.70152	-0.426919	-0.576522	-0.542777	-0.589834	-0.764223	-0.668854	-0.37308	-0.38435	-0.491328	-0.46085	-0.599414	-0.440729	-0.67629	-0.590462	-0.3528
ACTRT1	2.22503	2.00666	2.10702	2.59121	1.93527	1.66727	2.41343	1.4134	1.54537	1.76833	2.32917	1.08705	1.81799	1.96017	1.91375	2.13133	1.62529	1.56974	2.22503	1.76833	1.89709	1.72337	2.10702	1.98215	1.4134	1.83512	2.95443	1.66727
ACTRT3	-0.331928	-0.296448	-0.449549	-0.380358	-0.258804	-0.392341	0.174654	-0.276758	-0.147071	0.0685128	-0.011989	-0.195239	0.210443	0.134789	0.0313635	-0.190341	0.369874	0.187386	-0.167254	-0.281208	0.264278	-0.140694	0.0362001	0.0957448	0.301939	0.0382102	0.156314	0.145717
ACVR1	-0.53539	-0.348049	-0.22201	-0.307229	-0.292683	-0.368989	-0.464774	-0.205655	-0.539841	-0.393303	-0.366196	-0.426919	-0.427199	-0.553783	-0.315277	-0.314827	-0.555363	-0.322731	-0.0759571	-0.419934	-0.325481	-0.258377	-0.211793	-0.322842	-0.307352	-0.214176	-0.323519	-0.174112
ACVR1B	0.086734	0.224653	0.174416	-0.0659763	0.083019	0.0134376	0.0954772	-0.0641848	0.178337	0.266855	0.136798	0.0675319	0.114594	0.143591	0.247823	0.0465204	0.212763	0.237579	0.267126	0.121508	0.0110972	0.21167	0.429392	0.480157	0.182411	0.128625	0.216296	0.01605
ACVR2A	0.08046	0.147578	0.160532	0.2448	0.0691566	0.0936959	0.142262	0.250706	0.0987218	0.0783381	0.136399	0.0936489	0.220278	0.31613	0.202616	0.170473	0.435136	0.217417	0.257096	0.226121	0.138012	-0.0304836	0.00303955	-0.0953971	0.0634516	0.174278	0.387428	-0.0784079
ACVR2B	-0.901604	-0.718829	-0.863746	-0.711416	-0.688858	-0.648867	-0.649807	-0.664367	-0.457036	-0.534245	-0.736405	-0.486161	-0.562032	-0.222935	-0.615724	-0.433235	-0.520114	-0.463448	-0.359383	-0.34307	-0.525875	-0.276758	-0.373774	-0.0645134	-0.318931	-0.229757	-0.389027	-0.286906
ACVRL1	-0.220166	-0.389562	-0.449742	-0.351746	-0.353203	-0.41331	-0.516202	-0.449898	-0.50492	-0.434394	-0.599576	-0.14665	-0.589113	-0.387733	-0.173434	-0.465106	-0.444152	-0.547477	-0.334653	-0.437131	-0.529621	-0.427055	-0.504595	-0.245809	-0.448562	-0.365202	-0.380886	-0.408421
ACY1	0.0321395	-0.387001	-0.366602	0.0182601	-0.346823	-0.140128	-0.263785	-0.0262657	-0.0121848	-0.0134238	-0.275181	-0.160062	-0.344586	-0.0726117	-0.447148	-0.0078188	-0.177197	-0.112478	0.122942	-0.328714	-0.42393	-0.218087	0.0237129	-0.409293	-0.159911	-0.160382	-0.375795	-0.243086
ACY3	0.714854	0.702565	0.943958	0.559853	0.686217	1.00205	0.814831	1.01258	1.52765	1.23727	0.987307	1.30931	1.43509	1.36486	0.855687	0.544525	0.841984	1.09854	0.710981	0.959932	0.979411	1.04549	0.855687	0.772068	0.814831	0.6461	0.655833	0.578374
ACYP1	-0.910603	-1.0907	-0.821024	-1.00177	-0.673434	-0.459819	-0.768833	-0.612439	-0.532674	-0.746321	-0.566936	-0.487979	-0.439173	-0.74262	-0.544569	-0.59001	-1.01983	-1.085	-0.901604	-1.03145	-0.779575	-0.465295	-0.618842	-0.695702	-0.964073	-0.77436	-0.856193	-0.936514
ACYP2	1.44876	0.753967	1.00019	1.34521	0.679032	1.10166	0.875899	1.24594	1.09298	0.923422	0.976147	0.696132	0.911018	0.971031	0.546908	0.88554	1.15559	1.10354	1.05251	0.879923	0.801807	1.11871	0.890749	0.719699	1.01488	0.971031	0.674411	0.929152
ADA	-0.148663	0.0997378	0.300055	-0.0836153	0.443454	0.191728	-0.0140608	0.223359	0.00401289	-0.209617	0.0259381	0.0079684	0.119614	-0.10742	-0.134648	0.157429	-0.0248497	0.00246942	0.059672	0.123871	-0.00298488	-0.0227454	0.186756	-0.0574969	0.228978	-0.133336	-0.0985637	-0.109806
ADAL	-0.143292	-0.324121	-0.307445	-0.329252	-0.34474	-0.214828	-0.424679	-0.318632	-0.41265	-0.295142	-0.484927	-0.164866	-0.263896	-0.393577	-0.0131374	-0.145053	-0.247683	-0.217806	0.00406591	-0.289536	-0.240807	-0.243685	-0.341571	0.155353	-0.283633	-0.218009	-0.129881	-0.3653
ADAM10	0.485756	0.583157	0.470808	0.601295	-0.320352	-0.273073	0.459481	-0.163624	0.300396	0.30427	0.174278	0.240876	0.493469	0.420101	0.377458	0.294024	0.383228	0.356166	0.310556	-0.0124515	0.346025	0.369874	0.249198	-0.0468441	0.408517	0.526277	0.124578	0.375941
ADAM11	0.6461	0.923422	0.909879	0.438244	0.461376	0.648946	0.686992	0.709311	0.697764	0.569999	0.658672	0.510245	0.379729	0.249365	0.523701	0.595098	0.206527	0.473552	0.496365	0.2317	0.465952	0.475312	0.517714	0.421207	0.475661	0.290074	0.385871	0.554279
ADAM12	-0.0768275	-0.150666	-0.130432	-0.139146	-0.0737552	-0.13076	-0.159064	-0.24684	-0.212416	-0.267356	-0.225233	-0.303854	-0.287004	-0.212592	-0.205026	-0.246233	-0.21734	-0.182465	-0.179188	-0.230591	-0.196533	-0.232478	-0.36924	-0.327736	-0.272494	-0.230913	-0.244936	-0.236677
ADAM15	0.482802	0.621073	0.300929	0.260403	0.337919	0.536722	0.375792	0.359403	0.356907	0.387817	0.347709	0.308521	0.175947	0.380112	0.389301	0.291477	0.316458	0.368689	0.277858	0.287714	0.341532	0.348973	0.373247	0.306857	0.20893	0.324006	0.131323	0.259232
ADAM18	-0.0163335	0.269924	0.162878	0.135923	0.11216	0.161338	0.112536	-0.0132384	0.158261	0.0699711	0.268619	0.126936	0.351462	-0.0231843	0.193112	0.166861	0.161846	0.330562	0.0603801	0.0651051	-0.144909	0.031429	-0.143586	0.130092	-0.344387	0.214235	0.388685	-0.0497815
ADAM19	0.0353791	0.708487	0.542941	0.333441	0.361746	0.50205	0.626579	0.631415	0.318587	0.520153	0.571278	0.515716	0.464347	0.382468	0.384397	0.480979	0.450764	0.479653	0.673798	0.458673	0.483092	0.344803	0.383907	0.431742	0.510607	0.538164	0.439918	0.329274
ADAM20	0.280626	0.118814	0.215403	0.313375	0.142719	0.219596	0.104039	0.313375	0.161205	0.0991899	0.100617	0.477257	0.264187	0.220604	0.26154	0.0741469	0.0933352	0.113369	0.119573	0.212853	0.173542	0.100399	0.315698	-0.090958	-0.0983366	0.109179	0.20817	0.21568
ADAM21	-0.350798	-0.296124	-0.188362	-0.561794	-0.33996	-0.446178	-0.490434	-0.570723	-0.370986	-0.61961	-0.53101	-0.453238	-0.519799	-0.511067	-0.461154	-0.332147	-0.526415	-0.576766	-0.215417	-0.518376	-0.323994	-0.288481	-0.326751	-0.600188	-0.393717	-0.521583	-0.331396	-0.516791
ADAM22	-0.0265104	-0.10386	-0.181227	-0.275068	-0.111521	0.0286715	-0.105971	-0.0949198	-0.141591	-0.00616628	-0.0296776	-0.00639847	-0.0717495	-0.0513248	-0.13255	-0.0198098	-0.329375	-0.194005	-0.191736	-0.152227	-0.100669	-0.0569292	-0.0567726	-0.202397	-0.245012	-0.299305	-0.294428	-0.273428
ADAM23	0.23877	0.15785	0.185757	0.241324	0.270409	0.277175	0.0306722	0.33996	0.550158	0.391683	0.410836	0.361265	0.324379	0.441274	0.457734	0.253119	0.509973	0.514333	0.444438	0.594767	0.524073	0.782376	0.430999	0.627235	0.676502	0.256618	0.19856	0.558067
ADAM30	0.0788695	0.0547348	0.241324	0.258642	0.156598	0.113977	0.170537	0.284596	0.130234	0.148001	0.176435	-0.00687924	0.0551075	0.159399	0.120121	0.0131931	0.134384	0.033645	0.0106254	0.182958	0.0969108	-0.00251275	0.111135	-0.0801077	-0.172836	-0.0332743	-0.0513782	-0.0920896
ADAM33	-0.811504	-0.710262	-0.758801	-0.558779	-0.654266	-0.591358	-0.59772	-0.61861	-0.782371	-0.952871	-0.794691	-0.917245	-0.847151	-0.730432	-0.609896	-1.085	-0.705816	-0.813333	-0.929194	-1.26136	-0.957149	-0.86503	-0.762414	-0.71909	-0.924255	-1.17217	-0.882642	-0.891192
ADAM3A	0.0480898	0.129036	0.101951	0.1776	0.19986	0.177272	0.0756843	0.07429	0.311036	0.137811	0.131645	0.0865703	-0.151932	-0.138571	0.104427	0.0767645	-0.216883	0.213923	0.00410759	-0.0662341	-0.0561465	-0.237985	0.0865703	0.181333	-0.0372138	-0.199892	0.168568	0.0772547
ADAM5	-0.0590792	0.0574084	-0.0120618	0.0941777	0.197942	0.0523409	-0.0238298	0.0983914	0.0892192	0.0125356	0.0701628	-0.120923	-0.108076	-0.0286667	-0.0595568	-0.191388	-0.140229	-0.174026	-0.0758837	-0.145293	-0.116797	-0.0240227	-0.173016	-0.195726	-0.0504572	-0.125104	0.00155728	-0.14754
ADAM6	-0.0993253	-0.101076	0.0625482	-0.283006	-0.520991	-0.237684	-0.344387	-0.293244	-0.385882	-0.22266	-0.294765	-0.290984	-0.319264	-0.648356	-0.218679	-0.368862	-0.0556411	-0.507494	-0.439036	-0.628012	0.081142	-0.0576601	-0.199198	-0.337548	-0.133134	-0.116395	-0.12718	-0.106824
ADAM7	0.0982193	0.0842171	0.178129	-0.0813627	0.127284	-0.0224261	-0.0570902	0.0426484	-0.0707137	0.0752995	-0.00109449	-0.090958	-0.150374	0.0795202	-0.0088076	0.0354476	-0.0705597	-0.0716599	-0.102028	-0.033533	-0.0128837	0.1512	-0.0634367	-0.0777522	-0.0436305	-0.131046	-0.108775	-0.0803446
ADAM9	-0.147598	-0.373774	-0.108201	-0.021449	-0.343508	0.0069358	-0.203185	-0.143646	-0.150544	0.11513	-0.260364	-0.120985	-0.0585658	-0.0219747	-0.203451	-0.183363	-0.0365989	-0.165308	-0.239639	-0.23164	-0.139644	0.0610923	-0.0930554	-0.259153	-0.164619	-0.218548	-0.34702	-0.21356
ADAMDEC1	-0.0919249	-0.0515406	0.0483394	0.0865	-0.025059	-0.044593	-0.0536323	-0.081463	-0.102122	-0.104709	0.0297091	-0.12429	-0.057584	-0.210537	-0.214639	-0.255245	-0.0343123	-0.119408	-0.183519	-0.104424	-0.0653131	-0.215955	-0.171829	-0.166525	-0.282773	-0.165445	-0.271753	-0.0133597
ADAMTS1	-0.502151	-0.297064	-0.767997	-0.813709	-0.810042	-0.718204	-0.192554	0.132103	-0.0519068	-0.379259	-0.653635	-0.955063	-0.552737	-0.104184	0.0145287	-0.950614	-0.620323	-0.384474	-0.0831205	-0.558933	-0.423768	-0.274507	-0.738482	-0.562771	-0.888175	-0.160062	-0.0939063	-0.336599
ADAMTS10	0.609385	0.422093	0.458438	0.439089	0.361171	0.446656	0.554279	0.635175	0.463697	0.603298	0.576646	0.419159	0.449838	0.532073	0.492073	0.452641	0.420632	0.411321	0.395545	0.454166	0.499671	0.47763	0.492366	0.390794	0.530629	0.405145	0.42028	0.302616
ADAMTS12	-0.00134609	0.246502	0.17755	0.183468	0.0337968	0.0194214	0.102199	0.0979505	0.129233	0.042704	0.108074	0.236057	-0.00841404	0.149927	-0.0476195	-0.0272001	0.288999	0.204028	0.0632467	0.173802	0.141815	0.0671662	0.110518	0.0897703	0.0884913	0.0672601	-0.0544692	0.082634
ADAMTS13	-0.0643105	0.148057	0.155671	0.092353	0.179964	0.1841	0.215532	0.1512	0.544231	0.121928	0.16915	0.388935	0.391874	0.123066	0.270019	0.160607	0.275987	0.339323	0.293111	0.296908	0.180111	0.168999	0.278607	0.281425	-0.111177	0.317517	0.339323	0.218251
ADAMTS14	-0.0461903	-0.0911576	0.0180164	0.18795	-0.1968	-0.165758	0.043772	0.00885871	-0.047511	0.0743327	-0.025786	-0.0222731	-0.126992	0.0206751	-0.0619877	0.0822515	-0.209707	-0.123566	-0.012716	0.00682637	-0.149031	0.00303955	-0.0417281	-0.103251	0.0809363	-0.0781191	-0.0962519	0.0819935
ADAMTS16	0.265246	0.196431	0.264871	0.0739461	0.423081	0.338184	0.193476	0.104544	0.171109	0.215959	0.142514	0.150024	0.183088	0.19986	0.216808	0.234941	0.151619	0.12371	0.343854	0.264023	0.205991	0.208305	0.0538632	0.16924	0.126471	0.166591	0.19986	0.177207
ADAMTS17	-4.05682e-05	-0.023583	-0.169322	0.0223202	-0.108496	-0.0914349	0.0713495	-0.0180883	-0.0463803	-0.0261259	0.127605	-0.047668	-0.00165887	-0.0433593	0.0343622	-0.00150287	-0.00109449	0.0793383	-0.0918705	-0.00626522	0.100224	0.00821536	0.0651623	-0.0314817	0.061367	0.0410409	-0.0608176	-0.0523143
ADAMTS18	-0.295346	-0.288801	-0.318931	-0.261672	-0.194005	-0.282248	-0.267011	-0.32328	-0.147689	-0.234414	-0.192291	-0.30866	-0.304057	-0.213669	-0.412798	-0.455129	-0.401867	-0.406122	-0.303157	-0.354215	-0.261448	-0.404772	-0.306658	-0.399112	-0.376828	-0.437394	-0.390324	-0.341696
ADAMTS19	-0.229757	0.043495	-0.0221593	-0.220239	-0.191914	0.061367	-0.142089	-0.255654	-0.0047315	-0.0721777	-0.33203	-0.121722	-0.0584152	-0.0218504	-0.0535666	-0.322088	-0.048764	-0.168578	0.00950144	-0.193775	-0.179388	-0.0594363	-0.317575	-0.19102	-0.107298	-0.12282	0.0283078	-0.192554
ADAMTS2	-0.268929	-0.0889977	0.0691566	0.264364	0.175555	0.0436585	0.206932	0.209687	0.0126369	0.00764708	0.0867913	-0.0078188	-0.0290244	0.051128	-0.0115295	-0.0536323	0.00956181	-0.0840582	0.070028	0.0894122	0.0887287	-0.103006	-0.055024	-0.10648	-0.0815945	-0.10392	-0.12084	0.0770633
ADAMTS3	0.0364707	0.114225	0.0840273	0.138399	0.130875	0.102996	-0.075075	0.131855	0.0399184	-0.101846	-0.00675692	0.0704693	0.0648033	-0.098947	0.129495	0.0154995	-0.277681	-0.12348	0.0505288	0.0955213	0.0404106	-0.157524	-0.0171907	-0.050644	-0.185929	-0.162985	-0.127861	-0.185254
ADAMTS5	-0.332664	-0.22392	-0.0952655	-0.307992	-0.368275	-0.368175	-0.432964	-0.211039	-0.322088	-0.354215	-0.404772	-0.308444	-0.42393	-0.218439	-0.280691	-0.299899	-0.328714	-0.347712	-0.398564	-0.223388	-0.15533	-0.239972	-0.296448	-0.455515	-0.447702	-0.442296	-0.351198	-0.28556
ADAMTS6	-0.0537826	-0.0608962	-0.00432488	0.110456	-0.197952	-0.0215163	0.0333509	-0.0114811	0.0718675	-0.165818	0.0817929	-0.0801567	-0.0540854	-0.19209	-0.0958479	-0.142585	0.0131365	-0.231547	-0.0362158	-0.0842484	-0.0380072	-0.180884	-0.0490055	-0.144279	-0.128345	-0.03539	-0.153688	0.10781
ADAMTS8	0.0792193	0.0510724	0.0466296	0.0357901	-0.0046743	0.0880821	0.216443	0.274778	-0.0331211	0.0624241	0.150306	-0.0975581	-0.0377476	0.017642	0.215142	0.257559	0.179964	0.0774236	0.259318	0.103338	0.0536734	0.0265613	0.156043	0.120938	0.146673	0.0578804	0.136729	0.131991
ADAMTS9	0.467064	0.381288	0.150134	0.337382	0.203117	0.164908	0.453931	0.254306	0.165226	0.231137	0.21927	0.233827	0.287949	0.324732	0.350327	0.14832	0.211096	0.192109	0.132867	0.190671	0.0606276	0.0598176	0.0204211	0.103557	0.0277454	0.107636	0.132046	-0.016104
ADAMTS9-AS1	0.164908	0.414232	0.654302	0.690272	0.611464	0.458438	0.434735	0.459898	0.572429	0.234438	0.218593	0.490373	0.584044	0.499455	-0.306566	-0.00461324	0.150495	0.183623	0.0632999	-0.0082373	0.171177	0.288296	0.286906	0.145815	0.269139	0.114891	0.218027	0.239343
ADAMTSL1	0.162168	0.218833	0.110138	0.0608907	0.0710039	0.102728	0.145586	0.318752	-0.0215163	0.198797	0.107052	-0.113341	-0.0602019	-0.210375	0.284853	0.339323	0.265318	0.209966	0.12039	0.192174	0.332671	0.207034	0.0937638	0.0735147	0.400733	0.234205	0.14313	0.100985
ADAMTSL2	-0.785843	-0.724918	-0.65474	-0.816175	-0.738482	-0.772884	-0.762768	-0.779179	-0.646423	-0.666504	-0.579874	-0.803022	-0.542777	-0.492484	-0.611188	-0.877407	-0.44893	-0.790033	-0.742974	-0.662097	-0.648867	-0.585372	-0.677424	-0.543219	-0.771801	-0.604882	-0.654454	-0.503539
ADAMTSL3	0.278799	0.503857	0.610393	0.421486	0.253697	0.461142	0.562858	0.607694	0.607694	0.6461	0.481306	0.558067	0.541581	0.791192	0.585254	0.501086	0.652859	0.595533	0.750454	0.214884	0.181935	0.717558	0.168414	0.517385	0.576646	0.460919	0.0960425	0.607694
ADAMTSL4	0.604358	0.767098	0.752752	0.657955	0.323863	0.393187	0.618012	0.612858	0.588323	0.604358	0.771318	0.896431	0.903298	0.516669	0.88743	0.76499	0.760583	0.857225	0.786925	0.760583	0.580173	0.659792	0.776376	0.862853	0.6165	0.75976	0.705089	0.540757
ADAMTSL5	-0.155477	-0.186793	-0.203804	0.102407	-0.171646	-0.187712	-0.150454	-0.0797695	-0.0280824	-0.076005	0.0360736	-0.357881	-0.404237	-0.294765	-0.242018	-0.411905	0.100794	-0.0612005	-0.0354467	-0.0527771	-0.0836826	-0.0578706	-0.120095	-0.0169903	0.118148	0.0145287	0.0406444	0.166361
ADAP1	0.243357	0.171858	0.231927	0.143591	0.472144	0.320285	0.0900671	0.263076	0.206668	-0.0355871	0.176515	0.124578	0.0674032	0.129372	0.150187	0.126718	-0.0937355	-0.0330009	0.0265613	0.231531	0.173363	0.0677698	-0.00382006	0.0620679	0.0800271	-0.0678346	-0.185929	0.0241952
ADAP2	0.763727	0.509973	0.333049	0.225368	0.434902	0.564212	0.609795	0.607269	0.486715	0.76163	0.462116	0.581125	0.315698	0.470626	0.40154	0.478972	0.377932	0.367009	0.380953	0.641982	0.503857	0.465321	0.425662	0.388143	0.321587	0.350702	0.701047	0.200851
ADARB1	0.501457	0.0294858	0.49478	-0.289017	0.159176	-0.0678346	-0.267528	-0.297367	-0.268929	0.0355128	0.204703	-0.0606704	0.0197035	0.0234768	-0.110417	-0.593544	0.151273	-0.2499	0.123871	0.391275	0.0016807	0.277858	-0.483978	0.0174211	-0.131191	0.00587285	-0.0783252	0.204913
ADARB2	0.275708	0.274354	0.195853	0.225535	0.152397	0.256029	0.255403	0.141867	0.213203	0.189155	0.163353	0.239949	0.227844	0.217825	0.21209	0.218902	0.146412	0.146041	0.134877	0.0884913	0.155884	0.0983914	0.1158	0.0214915	0.10345	0.0362512	0.0428692	0.0303332
ADAT2	-0.382838	-0.178088	-0.205026	-0.385882	-0.525875	-0.47934	-0.363873	-0.55297	-0.270859	-0.251675	-0.263896	-0.413792	-0.362861	-0.535999	-0.0889112	-0.543828	-0.129043	-0.362393	-0.291907	-0.434527	-0.24343	-0.354816	-0.515256	-0.716043	-0.303747	-0.122944	-0.104709	-0.229833
ADAT3	-0.700114	-0.72134	-0.422134	-0.767339	-0.680512	-0.761151	-0.686496	-0.584712	-0.672001	-0.611188	-0.61706	-0.558933	-0.559621	-0.403657	-0.810442	-0.810442	-0.698599	-0.738177	-0.819427	-0.706687	-0.836299	-0.719619	-0.952871	-0.951722	-0.902297	-1.01122	-0.864648	-0.766123
ADCK1	0.172928	-0.00489504	0.143974	0.026009	0.0233434	0.128869	0.00633002	0.205991	0.24258	0.0053995	0.276586	0.202616	0.302033	0.29433	0.313375	0.0711891	0.11357	0.309749	0.298923	-0.0119105	0.200501	0.195455	0.00401289	-0.165308	0.148759	0.176288	0.102819	0.244889
ADCK2	-0.517446	-0.578593	-0.392341	-0.314103	-0.523279	-0.34108	-0.434087	-0.356665	-0.318376	-0.169402	-0.278608	-0.194418	-0.234414	-0.190257	-0.22908	-0.19432	-0.0949198	-0.216982	-0.314103	-0.433657	-0.189056	-0.302358	-0.312396	-0.300349	-0.549737	-0.363276	-0.624982	-0.387916
ADCK5	-1.1376	-1.18851	-1.06054	-0.944902	-1.01571	-0.915324	-0.959156	-0.905293	-0.888818	-1.06307	-0.959556	-1.09429	-1.16065	-0.667338	-0.968261	-1.01898	-0.838393	-0.935398	-1.07531	-0.946396	-1.01983	-0.821938	-0.869011	-1.00601	-0.907718	-1.09135	-1.01513	-0.884521
ADCY1	-0.0476195	-0.226866	-0.0164636	-0.0574969	-0.275647	0.218743	-0.0724273	0.00246942	0.485062	0.277272	0.116283	0.210312	0.328925	0.0776043	0.0891712	0.00821536	-0.176162	0.0243978	-0.0790691	-0.0426601	0.0752995	0.0310322	-0.015384	-0.247518	0.0893427	0.043772	-0.0961157	-0.192866
ADCY10	0.346714	0.485311	0.239655	0.228676	0.267436	0.414757	0.375234	0.271111	0.711919	0.184362	0.283292	0.406545	0.287088	-0.0907569	0.351033	0.257238	0.24258	0.0505883	0.283639	0.356426	0.191887	0.316711	0.427183	0.103277	0.0293599	0.233476	0.365081	0.439256
ADCY2	-0.19016	-0.162248	-0.156099	-0.171016	-0.13988	-0.124518	-0.0352882	0.0889526	-0.122882	-0.0356504	-0.0663728	-0.162545	-0.123827	0.0245577	-0.0577919	-0.239377	-0.0440507	-0.167763	-0.124005	-0.0897304	-0.134326	-0.0993253	-0.0291634	-0.170751	-0.189056	-0.224518	-0.134233	-0.206136
ADCY3	-0.343976	-0.348268	-0.356919	-0.398564	-0.36125	-0.429805	-0.308091	-0.277059	-0.397941	-0.330236	-0.387916	-0.247961	-0.30473	-0.188362	-0.30866	-0.308894	-0.255134	-0.27437	-0.150281	-0.446028	-0.25794	-0.20761	-0.35518	-0.288801	-0.332517	-0.317254	-0.362727	-0.345893
ADCY4	-0.21309	-0.165151	-0.182962	0.039308	-0.0625688	0.0254499	0.193686	0.239133	-0.0584689	0.141347	0.0295881	0.247336	0.304394	0.297336	-0.00935423	0.0681991	0.194848	0.112422	0.258702	0.355937	-0.0527072	-0.00626522	0.0261466	0.250794	0.0570475	0.0547993	-0.0284227	-0.0989884
ADCY5	-0.28746	-0.349742	-0.281958	-0.2917	-0.295262	-0.221043	-0.186333	-0.249666	-0.242305	-0.259978	-0.16819	-0.366869	-0.328239	-0.313667	-0.323636	-0.341313	-0.26465	-0.36644	-0.312959	-0.488897	-0.210886	-0.36644	-0.322842	-0.217184	-0.360687	-0.433235	-0.360687	-0.39433
ADCY6	0.501735	0.31925	0.546908	0.745496	0.104178	0.521316	0.336279	0.401907	0.696817	0.670214	0.566849	0.431141	0.697764	0.733964	0.545815	0.319923	0.938686	0.797236	0.718203	0.724955	0.712588	0.606693	0.847656	0.592435	0.539608	0.81886	0.64143	0.678533
ADCY7	0.104903	-0.00580418	-0.0696875	0.333193	0.325097	0.160074	0.141413	0.181698	0.168094	0.309368	0.252849	-0.114843	0.460654	0.416568	0.351151	0.261694	0.388816	0.324243	0.206305	0.357701	0.0408432	0.131718	0.00682637	-0.013616	0.284955	0.393867	0.180435	0.289304
ADCY9	-0.56615	-0.625241	-0.737413	-0.687046	-0.773569	-0.639248	-0.4686	-0.808875	-0.705183	-0.809537	-0.748436	-0.593741	-0.781077	-0.405726	-0.620323	-0.736695	-0.637757	-0.495156	-0.605143	-0.658474	-0.806345	-0.518517	-0.694113	-0.435507	-0.658185	-0.651373	-0.568499	-0.616246
ADCYAP1R1	-0.273428	-0.190341	-0.0272001	-0.259535	-0.134565	0.0563865	0.0806696	-0.267119	-0.100786	-0.29066	-0.184483	0.0393734	-0.15539	0.0819935	-0.289113	-0.167833	-0.254168	-0.358243	-0.30226	-0.223708	-0.194156	-0.151468	-0.350398	-0.582947	-0.288917	-0.173677	-0.450409	-0.343203
ADD2	-0.118125	-0.168578	-0.276264	-0.243323	-0.229317	-0.336305	-0.34702	-0.208135	-0.249082	-0.31581	-0.247518	-0.250185	-0.237564	-0.190923	-0.0963137	-0.326649	-0.237071	-0.193366	-0.265443	-0.208044	-0.218957	-0.224518	-0.191736	-0.306898	-0.330716	-0.266934	-0.260902	-0.361768
ADD3-AS1	-0.0814193	-0.118879	0.0188598	-0.0781996	-0.0382076	0.150306	-0.4415	0.228676	-0.0278534	-0.036285	0.0874498	0.113746	0.0283808	0.0445422	-0.0296155	0.122725	0.366753	0.297705	-0.000294411	-0.00860986	-0.210693	0.181486	-0.0618438	0.100115	-0.231113	-0.218262	-0.0893841	-0.282556
ADGRA2	-0.0207743	0.0943027	0.0792193	0.447281	0.086734	0.0578804	0.529759	0.2588	0.486493	0.254561	0.503857	0.18092	0.396971	0.551609	0.292904	0.475312	0.533146	0.448909	0.488923	0.504202	0.530954	0.603298	0.457969	0.4676	0.500386	0.670214	0.603298	0.741524
ADGRA3	-0.256434	-0.312959	-0.487773	-0.41851	-0.392092	-0.429647	-0.463794	-0.314827	-0.533464	-0.584262	-0.501605	-0.36451	-0.546691	-0.386821	-0.528904	-0.501405	-0.529621	-0.134951	-0.465295	-0.292213	-0.47605	-0.166328	-0.263471	-0.474484	-0.239543	-0.419182	-0.295142	-0.36302
ADGRB1	0.226373	0.115215	0.0291122	0.162558	0.210935	0.201189	0.125446	0.390514	-0.00306713	0.101498	0.106116	0.316458	-0.0946407	0.166861	0.0827728	0.193823	0.026009	0.110769	0.113178	0.417731	0.137635	0.035091	0.0394895	0.183825	0.0522162	-0.00183742	-0.147847	-0.0477666
ADGRB3	-0.230671	-0.167705	-0.090192	-0.0269573	-0.0201096	-0.0885654	0.188325	-0.0865709	-0.129509	-0.211108	-0.19616	-0.108201	-0.265643	-0.220725	-0.116952	-0.153028	-0.0412633	-0.20485	-0.141675	-0.0742172	-0.139571	-0.181549	-0.153545	0.0602842	0.0572733	-0.141114	-0.176204	-0.228696
ADGRD1	-0.653373	-0.524108	-0.608821	-0.628679	-0.61043	-0.562032	-0.635275	-0.787312	-0.637757	-0.529868	-0.522383	-0.576522	-0.708931	-0.741713	-0.677424	-0.58371	-0.692366	-0.567312	-0.625886	-0.458155	-0.747309	-0.767997	-0.737014	-0.6043	-0.659081	-0.771801	-0.808238	-0.670506
ADGRE1	0.025385	0.237307	-0.0236802	0.190484	-0.0811623	-0.0271184	0.00601134	-0.163853	-0.194938	0.0137335	-0.025291	0.140693	-0.0517603	-0.0328853	-0.387258	0.00570595	0.0524995	0.0362512	0.0467271	0.160532	0.269673	0.125554	0.0382795	-0.0984788	-0.0174992	0.234706	0.178534	-0.0554255
ADGRE3	-0.802212	-0.469358	-0.62925	-0.196078	-0.871646	-0.907718	-0.0427795	-0.869011	-0.634315	-0.491132	-0.256029	-0.7356	-0.458155	-0.302872	-0.457558	-0.457036	-0.323994	-0.400581	-0.147324	-0.424567	-0.368664	-0.37467	-0.44247	-0.130081	-0.532069	-0.43253	-0.183666	-0.0624393
ADGRF1	1.01012	1.16876	1.4701	0.663902	0.747523	0.821219	0.716292	0.792402	1.16587	0.9619	0.6165	1.13717	0.905158	0.884227	0.909879	0.745496	0.613491	0.804208	0.844829	0.874943	0.495571	0.47186	0.861418	0.52602	0.371212	0.636964	0.626102	0.405688
ADGRF3	0.125446	0.116349	0.202987	0.152211	0.147237	0.259062	0.145138	0.239655	0.317305	0.314774	0.177341	0.182236	0.239949	0.211898	0.150952	0.096257	-0.037147	0.318273	0.0451646	0.116812	0.251825	0.33368	0.187571	0.179243	0.0957448	0.216025	0.201704	0.261694
ADGRF4	0.00532757	0.465585	0.403186	0.322738	0.0903322	0.612508	0.227727	0.287088	0.495277	0.44583	0.480441	0.313903	0.391087	0.374619	0.380112	0.436099	0.304625	0.46324	0.450008	0.490133	0.321853	0.472144	0.354306	0.421036	0.361746	0.246202	0.186244	0.484046
ADGRG1	0.0327909	0.293698	-0.0904906	0.16766	-0.0749239	0.00778512	0.302782	-0.192467	0.234875	0.435136	0.216296	0.326399	0.306099	0.116812	0.196869	0.246931	0.423081	0.316947	0.0979972	0.281714	0.0505883	0.127197	0.0659061	0.096257	0.149812	-0.0607468	-0.0529042	-0.103212
ADGRG2	0.00587285	-0.00873828	-0.0361401	-0.12592	-0.0307725	0.0185357	-0.107677	-0.0264263	-0.0717954	-0.0121848	-0.0387432	0.000490333	-0.143646	-0.0140001	-0.0653922	-0.178964	-0.188217	-0.0997829	-0.153445	-0.232285	-0.0403383	-0.0592848	-0.0932925	-0.0966312	-0.0806968	-0.0707137	-0.120316	-0.157987
ADGRG3	0.0623639	0.377932	0.034253	0.650892	0.375411	0.217489	0.232284	0.321223	0.225636	0.162609	0.21795	0.403327	0.248546	0.461376	0.225301	0.419159	0.252598	0.379431	0.331544	0.378686	0.141491	0.328407	0.27354	0.246931	0.193112	0.305437	0.307229	0.160351
ADGRG5	0.534376	0.376572	0.285154	0.173363	0.0532815	0.168094	0.307492	0.265527	0.328746	0.359271	0.212366	0.30427	0.512667	0.402318	0.407066	0.587507	0.349749	0.425662	0.523332	0.403025	0.547258	0.545417	0.46324	0.509163	0.402318	0.630461	0.350702	0.330182
ADGRG6	-0.338972	-0.417144	-0.413955	-0.370765	-0.39987	-0.320475	-0.328131	-0.333418	-0.368989	-0.543219	-0.487979	-0.417919	-0.510193	-0.366869	-0.219416	-0.514154	-0.430192	-0.630683	-0.680213	-0.402899	-0.808875	-0.53958	-0.462244	-0.567493	-0.418354	-0.486161	-0.268834	-0.543601
ADGRG7	-0.436567	-0.180456	-0.0723013	0.0502459	-0.16217	-0.327204	-0.205135	-0.234595	-0.305317	-0.281088	-0.257723	0.180611	-0.0837798	-0.192963	-0.2255	-0.439488	-0.128429	0.0883264	0.176435	-0.081113	-0.0115295	-0.362012	-0.188853	-0.127525	-0.505317	-0.283633	-0.179332	-0.230307
ADGRL1	0.270818	0.141491	0.224714	0.269507	0.266763	0.329867	0.258155	0.475038	0.516669	0.659792	0.236229	0.416248	0.413866	0.342773	0.569072	0.265246	0.462774	0.36955	0.426079	0.220149	0.419474	0.315943	0.0704039	0.201626	0.319482	0.35314	0.0711891	0.2202
ADGRL2	0.282836	0.0801974	0.192373	0.266433	0.150495	0.139029	0.357701	0.00357065	0.284771	0.139804	0.196807	0.253119	0.0852771	0.117754	0.105005	0.201985	0.21521	0.0141101	0.190782	-0.0187598	0.199911	0.238592	0.207238	0.0874498	0.174506	0.246127	0.214592	0.0602231
ADGRL3	-0.0754322	-0.102537	-0.0928915	-0.115431	-0.0901193	-0.0887006	-0.111582	-0.186138	-0.129749	-0.298075	-0.0708967	-0.048881	-0.0870842	0.0145287	-0.0509056	-0.197604	0.0166994	-0.0512006	0.0858978	-0.0539585	-0.207296	-0.0662341	-0.0825271	-0.0327172	-0.19304	-0.118488	0.140221	-0.122612
ADGRL4	0.354726	0.5574	0.448171	0.274982	0.419341	0.524073	0.541942	0.382745	0.328505	0.320157	0.412278	0.275497	0.327154	0.355937	0.326399	0.224068	0.283089	0.281714	0.257323	0.306661	0.395737	0.361746	0.408289	0.488338	0.170756	0.183779	0.25835	0.236469
ADH1A	0.248402	0.065624	0.0999584	0.294105	0.171324	0.0115912	0.287299	0.122942	0.0348303	0.00212311	0.157338	-0.113607	-0.0301398	-0.149319	0.00902956	-0.027936	0.129113	0.0230176	-0.146359	0.0091683	0.0145761	0.0361414	0.00350774	0.0439915	-0.064254	-0.0725663	0.0630342	-0.0218504
ADH1B	-0.0962519	-0.204939	-0.13501	-0.214828	0.0365904	0.065212	0.0409122	-0.0203717	-0.294016	0.0391338	-0.177607	0.0126922	-0.0333866	0.00242544	-0.00329868	-0.200175	-0.0592049	0.00481483	-0.154048	0.117826	-0.0254722	0.0441018	-0.0993945	-0.0251594	-0.117659	0.119171	0.258549	-0.112109
ADH1C	0.26154	0.208618	0.634586	0.332898	0.552873	0.43414	0.280815	0.633803	0.414232	0.246054	0.141413	0.342171	0.218125	0.241182	0.536293	0.249198	0.37568	0.29904	0.220006	0.352854	0.436855	0.14832	0.204028	0.310556	0.303552	0.138479	0.0640503	0.37568
ADH4	0.138827	-0.144812	0.084594	-0.0829882	0.128482	0.0776473	0.0299801	0.17399	-0.0251594	-0.0646865	-0.145509	-0.0266237	-0.124663	0.0748689	-0.0327172	-0.0922516	-0.383059	-0.259309	-0.0936618	0.00582065	0.0529428	-0.214828	0.046152	-0.263681	-0.124238	-0.34659	-0.07469	-0.192637
ADH6	-0.732774	-0.760084	-0.640776	-0.582649	-0.41	-0.539841	-0.60784	-0.516622	-0.665817	-0.564426	-0.602258	-0.697556	-0.540065	-0.45089	-0.291628	-0.502327	-0.549221	-0.650284	-0.481937	-0.563539	-0.194474	-0.271643	-0.432029	-0.561639	-0.249994	-0.547089	-0.347367	-0.621091
ADH7	-0.0140608	0.218251	0.14832	0.32815	-0.0666753	0.145513	0.137953	0.0481646	0.406685	0.0920084	0.0225518	-0.124365	-0.112252	-0.0600068	0.146875	-0.149872	0.0236114	0.195153	-0.128345	-0.340991	-0.19016	-0.41291	-0.166091	0.0904694	0.190413	0.256486	0.194026	0.0550535
ADHFE1	-0.362625	-0.369659	-0.302137	-0.332517	-0.239106	-0.296867	-0.488352	-0.27145	-0.221658	-0.257408	-0.307655	-0.204271	-0.243685	-0.00115515	-0.235907	-0.107831	-0.176914	-0.0483794	-0.428401	-0.467223	-0.259424	-0.405073	-0.356796	-0.0651096	-0.268834	-0.346905	-0.534841	-0.425095
ADI1	-0.0331951	-0.0793482	-0.270525	0.236621	-0.146359	-0.0669222	0.247418	0.155559	-0.076522	-0.148184	-0.119355	-0.095969	0.111135	-0.0557715	0.0252313	-0.120541	-0.184227	-0.13629	-0.122228	-0.0466744	0.0598176	0.0268564	-0.116319	-0.191388	-0.0374381	0.170371	0.210935	-0.00426882
ADIPOR1	0.0130678	-0.0198098	0.0729848	0.189854	0.197549	0.0549234	0.115897	0.0804106	0.034412	-0.169322	0.262233	-0.0802333	-0.409485	-0.339432	0.00303955	-0.182882	0.348129	0.180285	0.108253	-0.0439121	0.197263	0.0128856	0.0528313	-0.103648	-0.0383644	-0.0429623	-0.000188308	0.122525
ADIPOR2	-0.406021	-0.401477	-0.401867	-0.350545	-0.340357	-0.30866	-0.596451	-0.384142	-0.668376	-0.537539	-0.408421	-0.506083	-0.399558	-0.576368	-0.240728	-0.367162	-0.587531	-0.434889	-0.488352	-0.393717	-0.41851	-0.392485	-0.264515	-0.492211	-0.398564	-0.334035	-0.4999	-0.5886
ADIRF	0.371639	0.321587	0.324243	0.236469	0.316947	0.273733	0.103557	0.770497	0.262913	0.337382	0.171522	0.373088	0.0211533	0.249774	0.0685128	0.0979505	0.262053	0.214235	0.039308	0.0718675	0.321587	0.391407	0.216659	0.47186	0.12713	0.177072	0.265953	0.376885
ADK	-0.492691	-0.431576	-0.299778	-0.36924	-0.428067	-0.321279	-0.378188	-0.366196	-0.386383	-0.426045	-0.436831	-0.403269	-0.347367	-0.497355	-0.403269	-0.406835	-0.37181	-0.516791	-0.475865	-0.436141	-0.502742	-0.411905	-0.403657	-0.380752	-0.52367	-0.41953	-0.427942	-0.400921
ADM	-0.148828	0.0546541	-0.186041	-0.357583	-0.298651	-0.22423	-0.222846	0.0364196	0.0380856	-0.270154	-0.354473	-0.167059	-0.0229648	-0.233561	-0.288801	-0.0513782	-0.0483168	-0.0396874	-0.264972	-0.0220286	0.210443	0.151915	0.323047	-0.0355119	0.102339	0.185286	-0.11557	-0.189978
ADNP	-0.236191	-0.169561	-0.215498	-0.0995586	-0.139287	-0.147743	-0.209079	-0.141114	-0.149395	-0.137438	-0.146773	-0.22674	-0.0609452	-0.148076	-0.144114	-0.207543	-0.106038	-0.037147	-0.0802982	-0.242305	-0.16392	-0.20577	-0.0569933	-0.218957	-0.0188951	-0.0849921	-0.0437265	-0.0742172
ADNP-AS1	-0.232761	-0.366602	-0.2451	-0.455652	-0.450106	-0.365568	-0.344586	-0.465295	-0.512135	-0.545696	-0.290771	-0.235507	-0.262137	-0.396567	-0.0586393	-0.303854	-0.55521	-0.273073	-0.199892	-0.154832	-0.159286	-0.485971	-0.349642	-0.373774	-0.183223	-0.35564	-0.135325	-0.262706
ADNP2	0.119747	0.336408	0.214	0.419159	0.163051	0.00759002	0.144892	0.0304001	0.238449	0.0634516	-0.0470556	-0.0785922	0.213833	-0.34659	-0.139146	-0.132242	0.0305362	-0.108201	-0.159751	-0.305404	-0.0541449	0.0767162	-0.0584152	-0.104995	-0.190257	-0.00205486	0.0674655	0.0864419
ADO	-0.374542	-0.47085	-0.494484	-0.28869	-0.306898	-0.444152	-0.322601	-0.241704	-0.297482	-0.270637	-0.426454	-0.0946922	-0.184483	-0.438128	-0.0635344	-0.189815	-0.155544	-0.315277	-0.417779	-0.292444	-0.382838	-0.0651819	-0.411905	-0.117962	-0.131322	0.0752411	0.160351	-0.349742
ADORA1	0.0936959	-0.0619877	-0.036815	-0.206311	0.100794	-0.0562943	-0.0190252	-0.0082373	0.0552744	-0.0827258	0.0550535	0.177341	-0.128657	0.453142	0.0051015	-0.0390112	-0.100604	0.142882	-0.0986181	-0.0365394	0.00246942	0.234371	0.274022	0.143332	-0.0923184	0.319077	0.221722	0.136025
ADORA2A	0.176515	0.184022	0.121342	0.0345065	0.0960425	0.190342	0.0852365	-0.103588	0.309964	0.41526	0.148582	0.260403	0.209966	0.114399	0.388816	0.157996	0.326882	0.418594	0.229975	0.168094	-0.0216768	0.0555178	0.236229	0.119817	0.137425	0.0793383	-0.277681	0.0948052
ADORA2A-AS1	0.329034	0.265953	0.427183	0.403186	0.388143	0.36324	0.183311	0.365485	0.196683	0.301013	0.264364	0.275914	0.214679	0.224128	0.0844633	0.127918	0.0691566	0.185757	0.0310322	0.215752	0.173478	0.117642	0.184362	0.034412	0.0655627	-0.000780162	-0.0184588	-0.00856128
ADPGK	-0.108646	0.00759002	-0.0779785	-0.0430196	-0.00791526	0.0842802	-0.03265	-0.0632809	0.083235	0.0386118	0.148644	0.0203661	0.0652774	0.0751296	-0.0219137	-0.158353	-0.0429623	-0.015178	-0.0216768	0.0627956	-0.0897826	0.0374698	-0.11052	-0.0360245	0.0420693	-0.112109	-0.0619402	-0.159522
ADPRH	0.10733	0.249981	0.274662	0.0879567	0.275987	0.153478	0.15362	0.137262	0.268698	0.2448	0.227658	0.30894	0.284236	0.405245	0.204221	0.291563	0.30427	0.218125	0.172285	0.225952	0.363972	0.331665	0.409461	0.307229	0.49904	0.303978	0.351907	0.273329
ADPRHL1	0.0293002	-0.0640359	-0.15533	0.00183249	-0.14672	-0.0601442	-0.255245	-0.0844717	0.0585049	-0.227096	-0.227696	0.0479745	-0.0439121	0.11237	0.123004	-0.0695915	0.0100888	-0.00189027	0.151688	0.114523	0.134226	0.279354	0.00649391	0.302392	0.1357	0.219862	0.235305	-0.00992047
ADPRHL2	-0.0452705	-0.00916207	-0.0158615	0.122598	0.00874789	0.0619529	0.0165667	-0.0623717	0.106241	0.0361414	-0.00265573	0.000713372	0.0574725	-0.054943	0.0964866	-0.0590792	0.0569433	-0.0654792	-0.0527072	-0.148408	-0.0473257	-0.146945	-0.0630536	-0.0113042	-0.197169	-0.130432	-0.225887	-0.185869
ADPRM	-0.0482539	-0.541269	-0.138435	-0.397176	-0.318457	-0.26465	-0.215137	-0.438767	-0.255557	-0.205579	-0.493608	-0.304057	-0.19322	-0.507494	-0.292444	-0.278207	-0.267707	-0.205579	-0.372155	-0.155615	-0.109026	-0.19432	-0.145724	0.0134975	-0.413651	-0.125681	-0.341975	-0.428401
ADRA1A	0.677256	0.202042	1.10354	0.899448	1.01258	0.929152	0.59277	-0.00495844	0.744082	0.297105	0.785706	0.993638	0.558067	0.801807	0.75976	0.487542	0.96539	0.460424	0.358958	0.675149	0.659146	0.604982	0.707687	1.07632	1.02523	0.644784	0.481306	1.44876
ADRA1B	0.660458	0.546162	0.402318	0.361746	0.362164	0.398444	0.440732	0.385871	0.618882	0.533146	0.415477	0.424064	0.676502	0.4676	0.456671	0.599281	0.532407	0.432142	0.587048	0.480742	0.562858	0.652091	0.506779	0.150424	0.656544	0.506153	0.338866	0.50523
ADRA1D	0.479653	0.189487	0.403501	0.0293599	0.512667	0.345347	0.259318	0.452641	0.483754	0.223539	0.12538	0.304535	0.292904	0.4456	0.637615	0.263895	0.394071	0.530331	0.272135	0.58573	0.553211	0.486125	0.326882	0.382468	0.483527	0.299778	0.327582	0.417534
ADRB1	1.52765	0.8523	1.39203	1.19074	1.38348	1.24187	0.937344	1.53547	1.00205	1.02325	1.02148	1.25561	1.11158	1.22005	1.228	0.849085	1.19534	0.636372	0.76163	1.00205	0.743359	0.742641	0.778295	0.974229	0.740316	0.500386	0.551609	0.874943
ADRB2	0.310556	0.0793383	0.161769	0.309368	-0.0160469	0.116589	0.26154	0.228283	0.553457	-0.0742172	0.175192	0.0788695	0.238592	0.304625	0.443639	0.0760878	0.290653	0.39366	0.197263	0.26658	0.113129	0.105836	-0.102267	0.14467	0.330442	0.188325	0.0263989	0.0815666
ADRM1	-0.0345578	-0.0300808	0.0121156	0.0995181	-0.413188	-0.0728813	0.248402	0.119995	0.151688	0.061609	0.149417	0.0624901	0.242667	0.0499161	0.263524	0.153158	0.120495	0.0888562	0.0108172	0.0917749	0.0955213	0.210036	0.227333	0.323047	0.0842802	0.218125	-0.011385	0.215902
ADSL	-0.694318	-0.630069	-0.596738	-0.826269	-0.53713	-0.717524	-0.516791	-1.07853	-0.735002	-0.804574	-0.590941	-0.718204	-0.655908	-1.12392	-0.657644	-0.521407	-0.752989	-0.698962	-0.686006	-0.67936	-0.640567	-0.701207	-0.627538	-0.632041	-0.660741	-0.575364	-0.686496	-1.04984
ADSS	-0.249791	-0.453875	-0.244191	-0.0867908	-0.32341	-0.423768	-0.133652	-0.152227	-0.129114	-0.362861	-0.454927	-0.286444	-0.332147	-0.289113	-0.179774	-0.0453309	-0.0656889	-0.429805	-0.0697379	-0.330972	-0.162917	-0.226971	-0.053443	-0.108125	0.0808399	-0.0345578	-0.204408	-0.248217
ADSSL1	0.08596	0.14033	0.0816736	0.155559	0.218251	0.0241952	0.0608431	0.017356	0.197022	0.318972	0.159259	0.233033	0.0110537	0.102529	0.0628947	0.186435	0.148125	0.00176039	0.167887	0.270896	0.126045	0.180166	0.0741469	-0.0275569	0.0901737	0.112853	0.269924	0.0444132
ADTRP	0.170685	0.239343	0.306661	0.287533	0.166027	0.22835	0.207238	0.173015	0.268619	0.0605733	0.232788	0.184189	0.217417	0.279937	0.180847	0.151004	0.0456431	0.0924089	0.219792	0.166361	0.200998	0.341307	0.123066	0.20914	0.145247	0.201554	0.299138	0.187075
AEBP1	-0.121326	0.00242544	-0.0961157	0.422451	0.1391	0.081142	0.406685	0.47186	0.345347	0.196591	0.271216	0.186244	0.25148	0.221632	-0.0799544	0.307659	0.343459	0.375113	0.541942	0.0785418	0.509163	0.551609	0.258642	-0.0875259	0.252174	0.130715	0.265246	0.725738
AEBP2	-0.870378	-0.278092	-0.41481	-1.13326	-0.25087	-0.637235	-0.368043	-0.509033	-0.859557	-0.398047	-0.505684	-0.770365	-0.376959	-0.694113	-0.561794	-0.622827	-0.242845	-0.404509	-0.256559	-0.651102	-0.683179	-0.756464	-0.648867	-0.193454	-0.260966	-0.124458	-0.253142	-0.259153
AEN	-0.128709	0.0831019	-0.0971565	0.0863674	-0.0862276	-0.0956278	0.00466702	-0.292333	0.000793665	-0.0157275	-0.0417856	-0.14754	0.090525	-0.387001	-0.342109	-0.214553	-0.208383	-0.0588067	-0.181792	-0.434248	-0.260584	-0.250734	-0.171986	-0.272049	-0.317575	-0.150608	-0.442157	-0.119821
AFAP1	-0.486833	-0.0107795	-0.170751	-0.0513782	-0.362625	-0.228992	-0.311602	-0.31056	-0.129678	-0.0629982	-0.0931008	-0.15539	-0.0533229	-0.00698865	-0.444543	-0.350798	-0.41	-0.509795	-0.241921	-0.396892	-0.203451	-0.283555	-0.178843	-0.216231	-0.378188	-0.0921623	-0.351037	-0.385211
AFAP1L1	-0.230307	-0.208616	-0.0431455	0.116534	-0.0358134	0.0963162	0.226561	-0.155872	-0.204757	0.183088	0.456924	0.0243978	-0.00102213	0.488923	0.269673	0.233323	0.461142	0.42427	0.287949	0.386322	0.672265	0.612508	0.611464	0.645529	0.521107	0.959932	0.469848	0.763727
AFAP1L2	0.305627	0.0717218	0.132103	0.182236	0.288576	0.137093	0.361667	0.163424	0.116933	0.20477	0.475952	0.351598	0.207238	0.155671	0.552521	0.450482	0.378872	0.36324	0.28963	0.411841	0.316458	0.327477	0.486493	0.525298	0.229092	0.171858	0.300396	0.460177
AFDN	0.115025	0.496679	0.0873645	0.134877	0.113076	0.0599604	0.327582	0.255922	0.181821	0.238992	0.21433	0.230032	0.320658	0.20343	0.510245	0.182886	0.403501	0.298923	0.34635	0.235913	0.291683	-0.0128261	0.341532	0.196361	0.172335	0.198662	0.226856	0.14099
AFF1	0.0407644	0.0238943	-0.000688231	0.0347275	0.00237913	0.0184932	0.0108172	0.139148	0.0150277	0.0104232	-0.100917	0.0209035	-0.0498985	0.102142	0.127918	-0.0326097	-0.115989	-0.164697	-0.101324	-0.140368	-0.0391371	-0.0617207	0.0281423	0.0258208	0.0302169	-0.121115	-0.0542496	-0.152904
AFF2	-0.114008	-0.21668	-0.135378	-0.183519	-0.098947	-0.174437	-0.147227	-0.0770365	-0.170327	-0.293908	-0.155615	-0.202154	-0.281315	-0.303854	-0.427199	-0.233098	-0.187942	-0.296448	-0.245581	-0.107298	-0.103212	-0.307655	-0.294765	-0.244857	-0.27646	-0.239291	-0.285337	-0.143646
AFF3	-0.0333866	-0.0320115	0.00570595	-0.00593249	0.0103114	-0.036285	-0.0525654	-0.00389416	-0.115919	-0.0627922	-0.0765987	-0.141274	-0.124804	-0.0448131	-0.048881	-0.0940308	-0.153028	-0.16242	-0.111582	-0.0663115	-0.145589	-0.126215	-0.100225	-0.0368742	-0.189815	-0.191196	-0.0738124	-0.20779
AFF4	-0.198927	-0.267785	-0.502327	-0.243794	-0.344884	-0.300349	-0.389845	-0.300034	-0.28516	-0.316706	-0.379428	-0.10724	-0.29967	-0.222168	-0.290878	-0.231547	-0.334738	-0.340193	-0.326968	-0.245733	-0.526253	-0.0237677	-0.350545	-0.290586	-0.22266	-0.255245	-0.351448	-0.27646
AFG3L2	0.044807	-0.135734	0.0546541	-0.000345887	-0.162336	-0.00318453	-0.251874	-0.146582	0.082634	-0.125424	0.189408	0.183151	0.122127	0.292565	0.502867	0.281899	0.339323	0.204097	0.102728	0.288795	0.229975	0.228193	0.422849	0.323743	0.269673	0.379209	0.260157	0.219338
AFM	0.0711891	0.0744633	0.07027	0.221632	0.140412	0.152397	0.048943	-0.0187026	-0.0162896	0.121172	0.156043	0.0907726	-0.00171052	-0.00770055	0.139269	0.145375	0.000951747	0.117368	-0.0426601	0.061788	0.0292586	0.0251576	0.213923	0.0896984	0.0404723	0.048943	0.0628947	0.0722661
AFMID	0.0692985	-0.0509861	0.0759855	-0.104121	-0.0200031	0.441274	-0.274611	0.0694836	-0.126992	-0.14702	0.0270366	-0.172682	-0.0155832	0.133338	-0.207693	-0.111582	0.163424	0.11553	-0.0465488	0.381649	0.0112455	-0.394615	0.0971115	0.35959	-0.00178751	-0.0804951	-0.098947	-0.0823057
AFTPH	-0.449234	-0.119355	-0.482901	-0.0396079	-0.587713	-0.631274	-0.209815	-0.644474	-0.138732	-0.396308	-0.570546	-0.240171	-0.288376	-0.475167	-0.500658	-0.545879	-0.249666	-0.0742172	-0.245896	-0.497355	-0.288481	-0.303636	-1.0005	-0.355376	-0.182465	-0.262029	-0.425928	-0.0459291
AGA	-0.517804	-0.570923	-0.692699	-0.805945	-0.701965	-0.795999	-0.766358	-0.603375	-0.948027	-0.897185	-0.688364	-0.567312	-0.801212	-0.964073	-0.632041	-0.592857	-0.706687	-0.578183	-0.521792	-0.653635	-0.929194	-0.797755	-1.07358	-0.805945	-0.889757	-0.946864	-0.828692	-0.833605
AGAP1	-0.0875259	-0.182693	-0.10742	-0.151683	-0.127439	-0.141591	-0.125681	-0.122459	-0.10724	-0.212918	-0.163236	-0.172502	-0.155544	-0.0566777	-0.239543	-0.182613	-0.0761112	-0.110107	-0.241512	-0.18714	-0.101846	-0.10648	-0.149734	-0.167705	-0.174925	-0.209221	-0.162545	-0.204408
AGAP2	0.704228	0.571278	0.617392	0.605412	0.602721	0.377932	0.908469	1.05531	0.424064	0.558067	0.52669	0.565118	0.55646	0.617392	0.524073	0.546613	0.373088	0.733091	0.556009	0.706064	0.653642	0.475952	0.381978	0.597266	0.650892	0.50357	0.501457	0.433143
AGAP3	-0.090889	-0.191472	-0.0373254	0.0733803	-0.00911974	0.206733	0.148644	-0.144727	0.154046	0.20893	0.0583307	0.322204	0.29904	0.292686	0.29493	0.241182	0.303842	0.349634	0.202497	0.164341	0.265629	0.226561	0.0343153	0.110606	0.250084	0.332133	0.180772	0.165952
AGBL2	0.211504	0.182958	0.267035	0.181386	0.292565	0.269507	0.0434407	0.363443	0.209966	0.0596092	0.168249	0.258702	0.00570595	-0.0437851	0.151052	0.145586	0.0735147	0.117232	0.221224	0.218743	0.100506	0.0533452	-0.110417	0.052692	-0.000508413	-0.0862276	0.0760878	-0.0306315
AGBL3	0.32252	0.296415	0.11183	0.35881	0.278501	0.337028	0.254114	0.316711	0.112297	0.151751	0.182519	0.260224	0.200123	0.257724	0.142191	0.188044	0.252362	0.193686	0.327477	0.202192	0.257096	0.237477	0.33141	0.397113	0.283539	0.186679	0.324732	0.165759
AGBL4	0.131503	0.259062	0.102597	0.287006	0.249625	0.180551	0.167955	0.191585	0.0660901	0.15785	0.217877	0.0405986	0.157105	-0.0411402	-0.131535	0.0492577	0.0302817	0.247336	0.0628947	0.177989	0.22664	0.0502459	-0.0215579	0.19341	0.119573	0.172181	0.133547	0.0792854
AGBL5	-0.817739	-0.501245	-0.718547	-0.436141	-0.699271	-0.500851	-0.478949	-0.563723	-0.671802	-0.568719	-0.375374	-0.710869	-0.634315	-0.159656	-0.684	-0.623531	-0.9213	-0.644719	-0.599414	-0.600188	-1.0922	-0.710618	-0.710618	-0.705378	-0.764592	-0.953895	-0.89491	-0.846027
AGBL5-AS1	0.147578	-0.154937	-0.025291	0.141135	0.0921677	0.385108	0.236229	0.23146	0.204293	0.300055	0.105391	0.254479	0.116758	0.108807	0.360008	0.240511	0.259605	0.298185	0.0725214	0.152397	0.167343	0.402601	0.353715	0.372119	0.306553	0.207905	0.248901	0.184543
AGER	-0.195409	-0.178148	-0.18938	-0.299305	-0.271753	-0.290022	-0.19209	-0.249169	-0.200175	-0.0602019	-0.149812	-0.196625	-0.328589	-0.22423	-0.176914	-0.29719	-0.301023	-0.342824	-0.17778	-0.394042	-0.450409	-0.202154	-0.375795	-0.291504	-0.38435	-0.327736	-0.623531	-0.372713
AGFG2	0.638316	0.662804	0.639575	0.640316	0.600873	0.652091	0.712588	0.43414	0.621772	0.598709	0.773729	0.528306	0.781064	0.447281	0.543816	0.654302	0.753967	0.639575	0.756819	0.427743	0.638877	0.548564	0.675832	0.675149	0.508891	0.56817	0.651407	0.737274
AGGF1	0.108461	0.0883264	0.0508249	0.104903	0.149176	0.0510724	0.127605	-0.187395	-0.00928483	-0.0298474	-0.056366	-0.028307	0.0151213	-0.0320115	-0.148894	-0.023952	-0.219601	-0.144909	-0.12105	0.0917252	-0.0850659	-0.15872	-0.0069464	-0.148496	-0.101902	-0.143518	0.00183249	-0.0156335
AGK	-0.102781	-0.400389	-0.16618	-0.0878914	-0.295864	-0.191914	-0.565962	-0.400581	-0.0912954	-0.112042	-0.0485186	0.0384899	-0.0737552	0.111027	0.0169754	0.0754804	0.10345	0.292686	-0.068125	0.297477	0.0407019	0.00729051	-0.160449	0.0578273	0.0554061	0.0686706	0.242253	0.0625482
AGL	0.0787844	0.0662006	0.238374	0.250288	0.244448	0.0500595	-0.0334595	0.239845	0.16766	0.218183	0.328655	0.113629	0.185809	0.264117	0.231312	0.279177	0.146673	0.275708	0.440544	0.49726	0.232519	0.443804	0.390956	0.433945	0.181279	0.263606	0.333327	0.384545
AGMO	0.375494	0.509437	0.344324	0.364314	0.425662	0.477257	0.218902	0.376698	0.491782	0.477257	0.480157	0.534767	0.590836	0.561578	0.359403	0.425472	0.429189	0.41809	0.511774	0.368923	0.455665	0.364602	0.421036	0.141062	0.484645	0.288677	0.281819	0.15676
AGO1	-0.402119	-0.515648	-0.292938	-0.413188	-0.299545	-0.438454	-0.202629	-0.378553	-0.710618	-0.560079	-0.394042	-0.512674	-0.582425	-0.684885	-0.605143	-0.586872	-0.734615	-0.657147	-0.42103	-0.430192	-0.602939	-0.57795	-0.579682	-0.487317	-0.565962	-0.462729	-0.575776	-0.783618
AGO2	-0.212172	-0.124156	-0.273073	-0.215417	-0.37111	-0.230671	-0.216791	-0.358657	-0.210537	-0.254844	-0.190923	-0.240928	-0.219127	-0.178708	-0.14512	-0.26744	-0.195472	-0.155938	-0.201285	-0.18723	-0.214448	-0.248518	-0.124948	-0.137438	-0.32341	-0.37181	-0.319036	-0.255557
AGO3	-0.107298	-0.207873	-0.358243	-0.226635	-0.366732	-0.39578	-0.214553	-0.218875	-0.209309	-0.325966	-0.292776	-0.334957	-0.263681	-0.257846	-0.417144	-0.316706	-0.199794	-0.368175	-0.536897	-0.399558	-0.569182	-0.30226	-0.230307	-0.17778	-0.208779	-0.272575	-0.271838	-0.350545
AGO4	-0.637757	-0.672208	-0.624982	-0.746989	-0.669352	-0.542156	-0.558587	-0.545879	-0.34448	-0.526604	-0.546919	-0.524657	-0.570546	-0.431725	-0.504595	-0.741713	-0.448229	-0.63094	-0.669715	-0.764223	-0.601999	-0.538776	-0.383791	-0.466535	-0.810442	-0.615724	-0.489993	-0.569446
AGPAT3	-0.342957	-0.465796	-0.432239	-0.333186	-0.415365	-0.387584	-0.400786	-0.499078	-0.338054	-0.418256	-0.21734	-0.476572	-0.537943	-0.482285	-0.396892	-0.423768	-0.275287	-0.361356	-0.350798	-0.350398	-0.318376	-0.471127	-0.320126	-0.0420344	-0.505684	-0.437567	-0.294151	-0.118427
AGPAT4	0.210681	0.23784	0.162099	0.126871	0.101683	0.214679	0.253861	0.230163	0.11216	0.296223	0.134167	0.177424	0.170473	0.245767	0.170863	0.249365	0.226856	0.358665	0.157291	0.335534	0.255705	0.251747	0.214073	0.165811	0.341408	0.156598	0.145981	0.138333
AGPAT5	-0.37502	-0.254168	-0.34659	-0.548902	-0.394163	-0.457215	-0.605143	-0.410686	-0.332517	-0.460965	-0.431725	-0.324688	-0.345893	-0.415365	-0.355899	-0.494974	-0.605354	-0.361448	-0.612659	-0.486161	-0.8056	-0.39578	-0.684588	-0.745022	-0.692899	-0.541924	-0.767997	-0.662097
AGPS	-0.275835	-0.198854	-0.24734	-0.368275	-0.567079	-0.440233	-0.420573	-0.395675	-0.134326	-0.0806427	-0.139287	-0.255654	-0.228696	-0.221898	-0.211108	-0.206546	-0.281088	-0.12592	-0.221816	-0.290132	-0.279868	-0.321163	-0.498025	-0.161537	-0.451909	-0.326087	-0.0885654	-0.166859
AGR2	0.055735	-0.0490055	-0.0370795	-0.075075	0.150363	0.0353081	-0.106421	-0.0321134	-0.180789	-0.155188	-0.143148	-0.10889	-0.313048	-0.229936	-0.264822	-0.262984	-0.305722	-0.208469	-0.0460729	0.131183	-0.112413	-0.15086	-0.0159281	-0.230845	-0.21356	-0.131766	-0.410686	-0.477636
AGR3	0.0808399	0.218125	0.217648	0.256102	0.149812	0.06175	0.133902	0.0972585	-0.0722469	0.089896	0.0562516	-0.239291	0.197329	-0.180108	0.00996255	0.0503649	-0.00347121	0.000603638	0.0515133	-0.0968609	0.0788235	-0.0317335	-0.0616654	0.0410409	-0.120923	0.177001	0.0854861	0.147749
AGRN	0.0647409	0.0956394	0.0973446	0.117998	0.216501	0.120868	-0.0453309	-0.186333	0.196297	-0.00856128	-0.0396874	-0.231972	0.383086	0.311784	-0.193775	0.384545	0.403186	0.220895	0.254306	0.0308574	0.130056	0.123401	0.00885871	0.216735	0.237124	0.281362	0.273017	-0.110167
AGT	0.201474	0.0862973	0.826358	0.523701	0.507993	0.506153	0.400733	0.728154	0.402442	0.242497	0.248211	0.308036	0.408075	0.252362	0.349506	0.0714026	0.299778	0.202418	0.0422982	0.325528	0.309242	0.155119	0.496019	0.081034	0.444703	0.253213	0.305855	0.412899
AGTPBP1	-0.206239	0.0126922	-0.325199	-0.312061	-0.12794	-0.236191	-0.401735	-0.18169	-0.247893	-0.288264	-0.178708	-0.165445	-0.487979	-0.0567726	-0.232172	-0.346486	-0.114077	-0.201198	-0.131919	-0.346823	-0.424808	-0.337128	-0.339292	0.0318558	-0.191128	-0.512674	-0.192726	-0.27575
AGTR1	0.0393734	0.0431147	-0.093007	0.035091	-0.0612005	-0.136931	0.0539781	0.252849	0.0100255	-0.0196434	0.0576029	0.155119	0.17874	-0.0333294	-0.0816808	0.08596	-0.036285	0.0682627	0.0655627	0.172181	0.187223	-0.0454461	0.168568	-0.137676	0.0475833	0.115846	-0.0349331	0.050102
AGTRAP	-0.225426	-0.321163	-0.286157	-0.150807	-0.197417	-0.239972	-0.182189	-0.194418	-0.15872	-0.268088	-0.153293	-0.338391	-0.178843	0.00161179	-0.12409	-0.267884	-0.135959	-0.0369911	-0.0618438	-0.281856	-0.0708429	0.00176039	-0.0847819	-0.249359	-0.0125338	-0.0403383	-0.048881	0.0128284
AGXT2	-0.0740864	-0.272575	-0.0880974	-0.4028	-0.265933	-0.095342	-0.191294	-0.247893	-0.142346	-0.215137	-0.211793	-0.199198	-0.0626639	-0.00856128	-0.141675	-0.215498	-0.360582	-0.300034	-0.198927	-0.27575	-0.157814	-0.168578	-0.158535	-0.325966	-0.164545	-0.137093	-0.233855	-0.13629
AHCTF1	-0.350398	-0.553516	-0.425552	-0.600427	-0.403365	-0.488897	-0.453238	-0.614589	-0.574946	-0.478768	-0.661001	-0.438767	-0.286272	-0.542398	-0.319683	-0.579874	-0.490434	-0.568967	-0.464431	-0.50007	-0.52286	-0.508656	-0.393409	-0.643978	-0.481937	-0.425799	-0.456402	-0.761831
AHCYL1	-1.03866	-0.946396	-1.12242	-0.731874	-1.06993	-1.03711	-1.01122	-1.0833	-0.978382	-1.05046	-0.729078	-0.781077	-1.13005	-1.03563	-0.940613	-0.735002	-0.767997	-1.00538	-0.756464	-0.899881	-1.02744	-1.11234	-1.12927	-0.966946	-1.10153	-1.04138	-1.00425	-0.525446
AHCYL2	0.179964	0.0628512	0.154553	0.0720183	0.212994	0.129113	0.122832	0.0883264	0.126718	-0.00951947	0.189619	0.124071	0.12226	0.135393	0.12401	0.00406591	0.0197035	-0.0144201	0.0425384	0.0434407	0.0197035	0.0733107	0.109777	0.194406	0.159115	0.101951	0.121225	0.0820617
AHDC1	0.420632	0.254561	0.282096	0.337682	0.529449	0.486715	0.288102	0.584913	0.44583	0.0362512	0.358128	0.188393	0.196743	0.0132404	0.320856	0.501735	0.298923	0.0890201	0.401907	0.322854	0.423666	0.366393	0.300244	0.166653	0.405395	0.388365	0.18562	0.0905872
AHI1	-0.00846509	0.0343153	-0.0535666	-0.0887006	-0.0940851	-0.0793482	-0.114361	0.00717425	-0.0731351	-0.148894	-0.0928915	-0.0185185	-0.225608	-0.0611393	-0.0588841	-0.0573582	-0.216463	-0.20779	-0.222732	-0.145199	-0.00580418	-0.225426	-0.117311	-0.185199	-0.176162	-0.245999	-0.196224	-0.220864
AHNAK	-0.0491988	-0.0455708	-0.0784679	0.30174	-0.330972	-0.253713	0.261406	-0.266018	-0.112947	-0.158607	0.0981068	0.0623204	-0.01788	0.10909	0.162335	-0.0098729	0.190971	0.0875644	0.0294358	-0.0359729	-0.245328	-0.0886276	-0.264734	-0.256029	-0.0770365	0.177805	0.0626103	-0.0213322
AHNAK2	-0.675359	-0.765821	-0.640095	-0.28556	-0.509033	-0.550478	-0.569653	-0.784289	-0.49837	-0.373338	-0.511225	-0.546691	-0.507322	-0.507322	-0.91583	-0.465796	-0.385077	-0.540683	-0.57713	-0.505537	-0.462578	-0.5886	-1.00853	-0.820132	-0.478617	-0.578183	-0.707827	-0.517254
AHR	-0.417275	-0.224131	-0.239972	-0.18938	-0.259153	-0.181745	-0.118427	-0.325596	-0.317254	-0.153293	-0.103212	-0.351448	0.00190032	-0.347139	-0.357704	-0.0632809	-0.475167	-0.123827	0.0112455	-0.21356	-0.452072	-0.352558	-0.274876	0.0317093	-0.081113	-0.282556	0.0544078	-0.125751
AHRR	-0.0514683	0.000556912	-0.111949	-0.0655215	-0.357971	-0.17457	-0.0975581	-0.0667927	-0.0319184	-0.13301	-0.00451104	-0.216563	-0.0501875	-0.0975581	-0.18003	-0.0630536	-0.233561	-0.052615	0.0134376	-0.0786629	-0.101076	-0.0120618	-0.0732976	-0.208616	-0.0893841	-0.0521151	-0.0456856	-0.121174
AHSA1	-0.204671	-0.0693206	-0.0216153	-0.28586	-0.214992	0.0639332	0.109832	-0.261851	0.174654	0.0576642	0.153359	0.124125	0.262438	0.0576642	0.0973446	0.0815666	0.257238	0.174468	0.490659	0.0833005	0.149119	0.0997893	0.210681	-0.0837798	0.108807	0.257504	0.208855	0.0981068
AHSG	-2.19467	-2.00321	-2.16922	-2.43928	-1.82226	-1.32593	-2.3363	-2.31321	-2.20219	-2.27898	-2.13483	-2.18584	-2.46375	-2.13483	-2.24187	-1.8661	-2.67263	-2.65153	-2.35822	-2.47974	-2.69658	-2.06711	-2.35822	-2.05902	-2.13483	-2.30111	-2.25083	-2.84873
AHSP	-0.316999	-0.190549	-0.539841	-0.158989	-0.351649	-0.345654	-0.454357	-0.252373	-0.151001	-0.19781	-0.376545	0.0651051	-0.216463	-0.159984	-0.455515	-0.224925	-0.251081	-0.276983	-0.304157	-0.345553	-0.179027	-0.18212	-0.288024	-0.165445	-0.0400299	-0.424256	-0.476876	-0.374061
AIDA	0.532767	0.474573	0.428409	0.480441	0.426079	0.495062	0.357529	0.0521487	0.611987	0.328505	0.175611	0.513952	0.448171	0.597824	0.219338	0.464568	0.352359	0.44291	0.279629	0.377932	0.419341	0.438905	0.334556	0.327582	0.366531	0.215959	0.19491	0.270227
AIFM1	0.15522	-0.0852521	-0.0663728	-0.0196988	0.308411	0.490133	-0.306201	-0.00710547	0.166096	-0.0439847	0.242497	0.294628	0.416248	-0.0916313	0.353845	0.493756	0.0492059	0.451211	0.595098	0.349634	0.377757	0.407066	0.487542	0.664549	0.359897	0.477257	0.293234	0.442197
AIFM3	0.303552	0.00155728	0.0576642	0.178249	0.196297	0.127743	0.210395	0.214884	0.133844	0.084594	0.192519	0.208984	0.137953	0.121863	0.385871	0.325629	-0.0453931	0.218336	0.234941	0.151558	0.201474	0.170863	0.108924	0.0726052	0.368256	0.190189	0.281515	0.184644
AIG1	0.259318	0.051619	0.00897588	0.00587285	0.106815	0.0794048	0.0152414	0.0365904	0.0495746	-0.0154429	-0.00193131	0.166861	0.105229	0.103396	0.142823	0.0788695	0.144163	0.153803	0.106063	0.131645	0.145586	0.0488799	0.130454	0.114286	0.190782	0.108026	0.0694836	0.0291122
AIM1	0.106614	0.0537364	0.0409122	0.20383	0.127807	0.0933352	0.122191	0.0104232	0.199249	0.261458	0.0994467	0.00770975	-0.0338426	0.154107	0.257559	0.239419	0.0352548	0.160135	0.302782	0.0729848	-0.176282	-0.110167	-0.0295112	-0.0280116	-0.110417	-0.156099	-0.0841326	-0.0304099
AIMP1	0.121666	-0.017694	0.0351628	-0.00580418	0.207479	0.0731346	0.130875	0.0311567	0.0483394	0.203971	0.240609	0.233998	0.0929096	0.266278	-0.0146085	0.107379	0.333441	0.0750586	0.266855	0.197403	-0.044387	0.102339	-0.115132	0.0851877	0.0616698	-0.0845988	-0.0615859	-0.015108
AIMP2	-0.360053	-0.204598	-0.107527	-0.0585658	-0.19834	-0.180565	-0.0755918	-0.0582243	-0.391763	-0.286157	-0.278302	-0.257723	-0.177197	-0.347367	-0.254069	-0.34815	-0.333662	-0.19672	-0.191294	-0.179332	-0.202397	-0.393409	-0.241001	-0.425252	-0.223171	-0.223258	-0.26465	0.0057649
AIPL1	-0.188909	-0.244936	0.00223956	-0.0066013	-0.0653131	-0.145879	-0.126851	-0.0387873	-0.164866	-0.392485	-0.369101	-0.37308	-0.318015	-0.241413	-0.280191	-0.315933	-0.287547	-0.323878	-0.352558	-0.305722	-0.211205	-0.277526	-0.220239	-0.442157	-0.170184	-0.14543	-0.286803	-0.19322
AIRE	0.357974	0.22813	0.359897	0.471625	0.423309	0.284771	0.435514	0.121172	0.403987	0.889323	0.220006	0.284853	0.288795	0.437991	0.220895	0.357529	0.447281	0.207571	0.338319	0.242253	0.361171	0.453142	0.379729	0.731295	0.413866	0.178196	0.484645	0.451211
AJAP1	0.0559855	0.0496303	0.0157279	0.0596092	3.76626e-05	0.174506	0.0237783	-0.0928392	-0.155544	0.0291763	-0.166091	0.0494309	-0.0147195	0.0257535	-0.085364	0.00608714	-0.0489334	0.0568733	-0.0232972	0.149237	0.078723	-0.037147	-0.0645704	0.0589747	-0.0234397	-0.0736826	0.143535	0.0655627
AJUBA	-0.211205	-0.145053	0.00416143	0.0522751	-0.18561	-0.181499	0.035091	-0.156099	-0.0994552	-0.229549	0.0279258	-0.200807	-0.131592	-0.125751	-0.03539	-0.173076	-0.0217857	0.0358587	0.147947	-0.0559871	-0.172836	-0.0366553	0.0472935	0.100399	-0.0696875	-0.0558533	0.0895353	0.0141101
AK1	0.947932	0.945715	0.741524	0.908469	1.30931	1.13717	0.932352	1.27782	1.24187	1.09298	1.25561	1.20839	1.23282	1.16587	1.50547	1.60276	1.71097	1.33417	1.19074	1.72337	1.25893	1.4134	1.30931	1.23282	1.24187	1.38348	1.2978	1.15154
AK2	-0.124804	-0.138979	0.072464	0.000603638	-0.0826406	-0.0503411	-0.06039	-0.0954805	-0.0216153	0.0145761	-0.0702988	-0.0411911	-0.0277439	-0.206395	-0.0410924	-0.318141	-0.229936	-0.224335	-0.106421	-0.177197	-0.111177	-0.142147	-0.0813068	-0.116526	-0.225019	-0.0147195	0.0217419	-0.0760612
AK3	0.126871	0.0535446	0.111252	0.0910978	0.150618	0.198662	0.100851	0.0467789	0.157933	-0.101967	0.141491	0.1841	0.123785	0.0835818	0.187456	0.0897703	0.133609	0.242497	0.220674	0.23598	0.0367704	0.189213	0.158959	0.22741	0.162021	0.124946	0.293012	0.38296
AK4	-0.0639473	-0.268309	-0.155477	-0.0740864	0.0782127	0.000439245	-0.382706	-0.229435	-0.0592848	-0.285447	0.0270854	-0.0282635	-0.0321134	0.219596	0.285391	0.101394	0.328925	0.422849	0.228676	0.417904	0.419666	0.43296	0.361515	0.577924	0.461902	0.22925	0.457734	0.15771
AK6	-0.9861	-1.07358	-1.06476	-0.620905	-0.729777	-0.693515	-0.916693	-0.60359	-0.727587	-0.664956	-0.725156	-0.815754	-0.738177	-0.619062	-0.725156	-0.898084	-0.519327	-0.837958	-0.673646	-0.934463	-0.768833	-0.718829	-0.829526	-0.760435	-0.754117	-0.88095	-0.917739	-0.739907
AK7	-0.0917466	-0.205655	0.0287657	-0.00616628	-0.101256	0.0254986	-0.00265573	-0.000188308	0.00242544	-0.134141	-0.144727	-0.231547	-0.209547	-0.0787889	-0.196885	-0.0327172	-0.166737	-0.319264	-0.199567	-0.115293	-0.112654	-0.173744	-0.163672	-0.238238	-0.211039	-0.242845	-0.256133	-0.222575
AK8	-0.0387873	0.145513	-0.0771083	-0.129278	-0.120163	-0.0559219	0.0735147	0.218743	0.137371	-0.034151	0.0245056	-0.0424701	0.0226155	-0.108957	0.0426484	0.130286	0.0342031	-0.156176	-0.0594783	0.0389313	0.0209035	-0.0208959	-0.0385003	-0.00205486	0.0263989	-0.025291	0.0188129	0.0614776
AK9	0.0762503	0.153908	0.111181	0.111569	0.0110537	0.104039	0.0272325	0.100617	0.0680153	0.0169182	0.0352548	0.0555788	0.0681991	-0.0759571	0.137564	-0.100493	0.00561545	0.121342	-0.0705597	-0.0078674	0.0860201	0.205383	0.176017	-0.0820935	0.102728	0.230359	0.12371	0.0389981
AKAP1	-0.0268859	-0.150748	0.0366455	-0.144909	-0.138804	-0.0548846	-0.0757473	0.059865	-0.0862276	-0.186238	-0.189642	-0.120163	-0.205135	-0.0574212	-0.0406138	-0.128868	-0.135378	-0.138732	-0.219993	-0.134565	-0.154526	-0.181424	-0.0461392	-0.135246	-0.131468	-0.234796	-0.249791	-0.156603
AKAP10	-0.015691	-0.156176	-0.188018	-0.196625	-0.205655	-0.176497	-0.272494	-0.0292197	-0.215417	-0.0337857	-0.237449	-0.294765	-0.200473	-0.17561	-0.070155	-0.291628	-0.305514	-0.253634	-0.254565	-0.274748	-0.244747	-0.163624	-0.246142	-0.353687	-0.347897	-0.360147	-0.345124	-0.277582
AKAP11	-0.0776746	-0.0517603	-0.0820385	-0.0677275	0.0493689	0.00669674	-0.0187026	-0.0619877	0.0374153	-0.0691492	-0.0565363	0.0730764	0.0417046	0.101168	-0.214728	0.0016807	-0.259762	0.00930962	-0.076005	0.0632999	-0.121326	0.11922	0.0147406	0.0611505	-0.147227	-0.0413307	0.0436283	-0.151359
AKAP12	-0.546691	-0.485484	-0.468119	-0.614589	-0.449742	-0.41887	-0.40898	-0.27575	-0.362012	-0.516392	-0.524485	-0.435827	-0.42625	-0.435827	-0.241512	-0.306299	-0.330327	-0.399558	-0.40232	-0.392219	-0.332411	-0.434889	-0.437271	-0.496358	-0.267011	-0.242661	-0.406021	-0.428515
AKAP13	0.15901	0.264364	0.105005	0.0229448	0.0229448	0.0993152	0.136174	0.187699	0.131575	0.244962	0.137953	0.143067	0.114711	0.259163	0.298599	0.421036	0.222498	0.303978	0.363601	0.206802	0.251747	0.308036	0.386154	0.344686	0.360008	0.403987	0.327477	0.172865
AKAP14	0.0574084	0.0214107	0.0572316	0.384728	0.202616	0.234438	0.0831882	0.169749	0.142882	0.0413366	-0.0421765	0.0757816	-0.0280116	0.0282656	0.134226	-0.0402382	-0.0246916	-0.133696	0.0205556	0.0951705	-0.0716599	-0.0853159	-0.0769694	-0.172375	-0.115919	-0.0471868	-0.150807	-0.13501
AKAP17A	0.115846	0.0670456	0.0997378	0.175481	0.131718	0.154046	0.0753665	0.159259	0.141062	0.0971115	0.122191	0.236146	0.137564	0.235675	0.101119	0.175947	0.156043	0.165362	0.217106	0.238029	0.160223	0.21694	0.226561	0.101218	0.167473	0.238449	0.136025	0.100457
AKAP3	0.420442	0.434735	0.481838	0.372906	0.455244	0.481838	0.58359	0.779135	0.62223	0.379209	0.443639	0.340746	0.379858	0.575497	0.302972	0.428599	0.297858	0.332898	0.360102	0.406685	0.422283	0.358509	0.389865	0.301511	0.374777	0.226459	0.290788	0.207238
AKAP4	0.239507	0.291038	0.301599	0.0414493	0.130286	0.140466	-0.0194391	0.338036	0.188722	0.835801	0.0905872	0.170473	0.234941	0.0519655	0.0140127	0.0642715	0.143735	0.0709393	-0.0710686	-0.0249204	-0.0517603	0.11434	-0.114077	-0.0672791	-0.0227454	-0.0260006	-0.208469	-0.182546
AKAP5	0.153856	0.0324337	0.130817	0.0432102	0.0789246	0.12931	-0.0718608	0.0951199	0.156387	0.398138	0.265066	0.189706	0.418949	0.0459894	0.174954	0.266356	0.271327	0.282222	0.273733	0.150691	-0.0122873	0.108807	-0.0811623	0.092353	0.043495	0.193112	0.108924	0.144604
AKAP6	0.451567	0.589289	0.622821	0.51326	0.55908	0.464568	0.546908	0.653642	0.327255	0.378686	0.492366	0.304851	0.231394	0.56817	0.495277	0.747523	0.588323	0.388685	0.740316	0.714135	0.541581	0.555105	0.703579	0.762639	0.535126	0.398292	0.369391	0.716292
AKAP7	0.400563	0.297336	0.178615	0.0693595	-0.0188265	0.0827028	0.0674032	-0.0617207	0.15845	0.372687	0.122342	0.061367	-0.0284748	0.112536	-0.033533	0.0438415	-0.248803	-0.201933	-0.217917	-0.119641	-0.21921	-0.0471868	0.244227	0.124453	0.0283808	-0.0458705	0.0924656	0.209624
AKAP8	-0.330327	-0.521583	-0.575955	-0.520311	-0.5329	-0.29842	-0.115346	-0.474173	-0.453103	-0.520311	-0.590279	-0.172375	-0.115989	-0.420857	-0.466214	-0.21668	-0.634315	-0.330972	-0.517804	-0.446178	-0.614863	-0.520561	-0.580517	-0.18561	-0.134233	-0.355376	-0.158803	-0.39987
AKAP8L	-0.761462	-0.636771	-0.542777	-0.727317	-0.736695	-0.626795	-0.491515	-0.579682	-0.438128	-0.745022	-0.664956	-0.668092	-0.41291	-0.569182	-0.432029	-0.83086	-0.416354	-0.683463	-0.640095	-0.569182	-0.542156	-0.453103	-0.598213	-0.589609	-0.42678	-0.455515	-0.469431	-0.437271
AKAP9	-0.0290244	0.0459308	0.0350308	0.0247163	0.0846459	0.0641161	0.000556912	0.0772547	0.0466697	0.0666761	0.0508855	0.0413911	0.0490945	-0.0425864	0.114641	-0.0889112	-0.0192914	0.16041	-0.0450014	0.102142	-0.0410277	0.0438865	0.0555178	0.0809738	-0.0678346	0.0207491	0.0476929	0.072129
AKIP1	-0.674445	-0.616246	-0.544569	-0.698962	-0.63631	-0.516392	-0.734063	-0.555363	-0.51955	-0.667578	-0.642538	-0.654266	-0.645019	-0.46609	-0.683463	-0.860887	-0.611188	-0.817739	-0.759488	-0.75543	-0.757493	-0.670506	-0.803022	-0.569866	-0.839553	-0.752989	-0.89274	-0.754293
AKIRIN2	0.07429	0.234706	0.168161	0.131387	0.0455731	0.0242493	0.158529	0.0205556	0.139411	0.132366	0.0409122	0.0467271	0.0687304	0.0492577	0.00976825	0.0838151	0.0605733	0.0183038	0.354056	0.093513	-0.00922868	0.0545295	0.13853	0.083235	0.10733	0.2202	0.180551	0.0714856
AKNA	-0.192378	-0.164619	-0.588815	-0.260684	-0.430324	-0.148569	-0.324499	-0.274748	-0.423768	-0.260483	-0.109091	-0.285068	-0.34702	-0.187889	-0.535017	-0.282063	-0.211108	-0.377226	-0.297482	-0.402017	-0.40232	-0.312165	-0.467223	-0.568719	-0.446329	-0.390132	-0.544569	-0.415945
AKNAD1	0.31925	0.250631	0.33527	0.196869	0.21116	0.297952	0.204156	0.158314	0.433945	0.0672176	0.18663	0.0235368	0.206439	0.164286	0.210312	0.0977558	0.177341	0.158802	0.296011	0.081142	0.0323881	0.159872	0.0880821	0.130056	0.223194	0.186177	0.352981	0.0861676
AKR1B1	-0.661869	-0.652853	-0.279087	0.0993152	-0.288578	-0.298845	-0.254371	-0.699535	-0.223464	-0.253013	0.368689	-0.215787	0.162558	-0.365568	-0.259638	0.28611	-0.0043849	0.0544654	0.0654578	-0.156522	0.22288	0.233901	0.0676956	0.275366	-0.183774	0.0641161	-0.306658	-0.176744
AKR1B10	-0.516791	-0.410329	-0.42103	-0.50304	-0.650849	-0.541924	-0.406404	-0.552737	-0.255134	-0.0373254	-0.183223	-0.380131	-0.115346	-0.540303	-0.298542	-0.0166507	-0.0916313	-0.131191	-0.179027	-0.251414	-0.0157275	-0.00432488	-0.101967	-0.0431455	-0.298542	0.0433159	-0.138915	-0.268612
AKR1C1	-0.640998	-0.559433	-0.505537	-0.57744	-0.439173	-0.609393	-0.525638	-0.389845	-0.426454	-0.558587	-0.764223	-0.612439	-0.476414	-0.816175	-0.585372	-0.517804	-0.61528	-0.533464	-0.517446	-0.447897	-0.598983	-0.676634	-0.447702	-0.732774	-0.685147	-0.485484	-0.646672	-0.669715
AKR1C3	-1.88389	-1.74246	-1.13691	-1.181	-1.78803	-1.17097	-1.09885	-1.35502	-1.31325	-1.37362	-1.83879	-1.64381	-0.984463	-1.78034	-1.66943	-1.22177	-1.14465	-1.50005	-0.887225	-1.20165	-1.61685	-1.87675	-1.59283	-1.89325	-1.84524	-1.47798	-1.57003	-1.65757
AKR1C4	-0.129205	-0.0249204	-0.0974738	0.0999584	0.0404723	-0.27556	-0.250185	-0.188362	0.195781	0.11497	-0.328131	0.059865	-0.210537	0.158736	0.364314	0.284371	0.103891	0.207238	0.0947402	-0.126166	-0.241313	0.171796	0.127918	0.0223922	0.0720183	-0.557416	0.148815	0.316458
AKT3	-0.102914	0.0104865	-0.00422464	0.0605733	0.00183249	-0.110892	-0.0280824	0.00729051	-0.149872	-0.176162	-0.0680556	-0.189566	-0.111252	-0.1314	-0.232388	-0.171016	-0.138435	-0.118925	-0.130432	-0.0184588	-0.0449436	-0.176497	-0.193646	-0.0217372	-0.147598	-0.0271184	-0.169802	-0.045744
AKTIP	0.167955	0.514625	0.534767	0.144337	0.108461	0.207402	0.248791	0.191794	0.0797302	0.0341468	0.39672	0.379567	0.374133	0.246502	0.450008	0.43277	0.329274	0.364085	0.165302	0.464823	0.197329	0.326882	0.309138	0.436326	0.44583	0.454833	0.361361	0.425258
ALAD	0.065212	0.156096	0.20935	0.0578804	0.149494	0.0811997	0.270896	0.466726	0.0640503	-0.0350911	0.132867	0.188192	0.0944384	0.0653933	-0.171379	0.0771267	0.20383	-0.145293	0.0188129	-0.021212	0.211252	0.172335	0.20893	0.260007	0.190971	0.331995	0.0231481	0.119171
ALAS1	0.740316	0.421486	0.302616	0.516144	0.771318	0.855687	0.41099	0.314512	0.547631	0.866913	1.07632	0.925191	0.829171	0.718794	1.00019	1.24949	0.788781	1.29402	1.20175	1.01258	1.03047	1.28427	1.33417	1.11444	1.28427	1.24594	1.24187	1.24949
ALAS2	0.242415	0.166653	0.109777	0.0405479	0.126669	0.1158	0.146603	0.0566698	0.320035	0.260757	0.0572316	0.149119	0.293794	0.376427	0.12931	0.237896	0.111626	0.340641	0.27354	0.215333	-0.0836153	0.157429	0.239507	0.162558	0.176435	0.185357	0.0816736	0.214165
ALB	-1.78034	-1.9191	-2.14361	-1.78803	-1.65757	-1.94339	-2.47974	-2.16922	-2.0105	-2.37182	-2.28638	-2.05902	-2.18584	-2.16922	-2.15883	-2.37182	-2.62795	-1.94339	-2.49602	-2.42777	-2.81048	-2.22224	-2.62795	-2.46375	-2.14361	-2.67263	-2.84873	-3.4111
ALCAM	0.271429	0.172865	0.0866317	0.0226768	0.205509	0.314774	0.194259	0.255001	0.274982	0.20591	0.240154	0.116589	0.305437	0.425258	0.308731	0.168414	0.151688	0.249198	0.258276	0.153856	0.233827	0.246931	0.165952	0.363877	0.288296	0.277175	0.167217	0.234205
ALDH16A1	-0.0865709	-0.0405477	-0.0461903	-0.0433593	0.104649	0.0373638	-0.0419086	0.0967408	0.0825595	0.0869637	-0.0805822	-0.0146085	0.00833551	0.0794607	0.0534714	-0.101076	0.10785	-0.00247066	0.111372	-0.0326097	0.0876273	0.0628947	0.111569	0.0674032	0.0449014	0.113308	0.0291763	0.110015
ALDH18A1	-2.37182	-2.31321	-1.81262	-1.93087	-2.17967	-2.42777	-2.09179	-1.84941	-2.0535	-1.56785	-2.08373	-2.32599	-2.01873	-1.86215	-1.95727	-1.93087	-1.75734	-1.38611	-1.43414	-2.22224	-1.40787	-1.90639	-1.8661	-1.93087	-1.74926	-2.05902	-1.75324	-1.68695
ALDH1A1	-0.340483	-0.325596	-0.361573	-0.580922	-0.307992	-0.322601	-0.432239	0.185062	-0.188463	-0.209404	-0.262984	-0.148752	-0.205026	-0.301234	-0.363873	-0.316557	-0.217071	-0.280691	-0.193144	-0.115132	-0.133202	-0.451791	-0.272049	-0.0548846	-0.635756	-0.37257	-0.272352	0.129549
ALDH1A2	-1.24935	-1.79834	-1.39822	-1.75324	-1.84941	-1.22809	-1.90162	-0.363594	-0.938478	-1.35019	-1.78803	-1.54675	-1.10104	-1.57326	-1.75324	-1.52772	-2.02436	-1.31715	-0.964666	-1.33085	-1.31715	-1.33879	-1.655	-1.59	-1.2504	-0.756839	-0.866086	-0.958242
ALDH1A3	0.112604	-0.0789044	0.012429	-0.0663115	-0.0710153	0.0150277	0.0845313	-0.143518	0.0373638	0.118544	-0.118663	-0.0637278	-0.0213322	0.110606	-0.181424	0.20092	0.0302169	-0.00562115	0.152062	-0.140053	-0.0490646	0.00956181	0.0675913	-0.201351	0.00851364	0.0628512	0.198719	0.093944
ALDH1B1	0.193244	-0.0182765	0.0241952	0.159456	-0.115431	-0.129043	0.218183	0.218652	-0.223085	-0.0802333	0.127555	0.1434	-0.00860986	-0.167479	0.160223	0.248112	0.0757317	-0.0412633	0.210681	0.122525	0.19856	0.151418	-0.0316366	-0.125829	0.239343	0.182191	0.237799	0.133948
ALDH1L1	0.305855	0.245451	0.157637	0.335534	0.289304	0.235853	0.124827	0.11216	0.442017	0.212665	0.273654	0.34235	0.326031	0.31765	0.308036	0.235913	0.475952	0.364909	0.288576	0.246127	0.329364	0.348417	0.471029	0.402318	0.449838	0.316832	0.211348	0.311292
ALDH1L2	0.0153672	-0.0397665	0.212591	0.172181	-0.0893841	-0.114311	0.0645379	0.0875069	-0.0947575	-0.00992047	-0.00403547	-0.0374381	0.0113599	0.0392551	-0.1126	-0.0395424	-0.130974	-0.132935	-0.0800209	-0.095969	-0.00251275	-0.0582243	-0.0066013	-0.118125	-0.090958	-0.0840582	-0.0829882	-0.0905627
ALDH3A2	0.0943762	0.143664	0.156457	0.238911	0.378546	0.134167	0.100901	0.203306	0.157291	-0.0904236	0.0663189	-0.0246359	0.0203661	0.0645379	0.0531987	0.0495746	-0.0862276	-0.0650296	0.00277783	0.0850082	0.0306722	0.0717218	0.165226	0.197876	-0.0108872	0.0915574	0.0132907	0.163353
ALDH3B2	-1.0184	-1.18592	-0.810719	-1.07712	-1.45923	-1.04779	-1.01635	-1.0124	-0.903993	-0.89327	-0.861861	-1.03453	-0.980837	-1.11521	-0.948027	-0.956587	-0.88095	-0.964073	-0.763439	-0.958635	-0.937429	-1.00425	-0.814894	-1.00236	-1.0005	-0.722716	-0.763439	-0.7523
ALDH4A1	0.262816	0.382745	0.151835	0.425869	0.107511	0.132178	0.668332	0.344324	0.309368	0.640951	0.374441	0.213604	0.559447	0.378872	0.540379	0.628956	0.519833	0.669625	0.783536	0.41304	0.646949	0.690888	0.462341	0.959932	0.555105	0.879923	0.600873	0.680203
ALDH5A1	0.233827	0.0526189	0.112658	0.229745	0.292255	0.224068	0.197022	0.235375	0.228283	0.186679	0.214679	0.130346	0.161692	0.159054	0.141062	0.210775	0.159531	0.189706	0.244448	0.146603	0.225016	0.292022	0.207402	0.308287	0.126045	0.295159	0.244962	0.348847
ALDH7A1	-0.813333	-1.07776	-0.725865	-0.902772	-1.07425	-0.75786	-1.12674	-0.937056	-0.560699	-0.690516	-0.9861	-0.763439	-0.719619	-0.847151	-0.75786	-0.708405	-0.70635	-0.901604	-0.915324	-0.780297	-0.667885	-0.664367	-0.750741	-0.790914	-0.589834	-0.680719	-0.92215	-0.560254
ALDH9A1	-0.885676	-0.794071	-0.651102	-0.611693	-0.753426	-0.648059	-0.651373	-0.640281	-0.427724	-0.583955	-0.34257	-0.641539	-0.573174	-0.20577	-0.334412	-0.0596814	-0.075075	-0.278092	-0.192291	-0.18913	-0.192726	-0.0864979	-0.0411911	-0.164467	0.0489855	0.11009	-0.213819	0.102819
ALDOB	0.321092	0.180435	0.383086	0.652859	0.369992	0.374619	0.310556	0.399268	0.296655	0.240078	0.375494	0.269841	0.357099	0.338319	0.374619	0.461902	0.595533	0.580173	0.508338	0.53555	0.604358	0.424721	0.487764	0.481577	0.61606	0.452419	0.408075	0.277958
ALDOC	0.471287	0.132309	0.35974	1.21234	0.314127	0.465585	-0.141891	0.496679	0.541942	0.443454	0.546162	0.653642	0.729749	0.307365	0.204634	0.686217	1.05067	0.576987	0.721435	0.716292	0.871633	0.94251	0.465321	1.08097	1.00019	0.78792	0.686992	0.79356
ALG10	0.56591	0.556009	0.377458	0.553457	0.493756	0.420101	0.320035	0.417731	0.517714	0.49478	0.577924	0.510607	0.464823	0.433945	0.584044	0.282836	0.308731	0.261458	0.365485	0.346943	0.251591	0.340525	0.527602	0.196683	0.106934	0.210615	0.379729	0.429787
ALG10B	-0.706091	-0.346905	-0.0704195	-0.368989	-0.424679	-0.52286	-0.447897	-0.149941	-0.546919	-0.41439	-0.336989	-0.576368	-0.511067	-0.366602	-0.611693	-0.45102	-0.273196	-0.50007	-0.436567	-0.297572	-0.284593	-0.543601	-0.365722	-0.204671	-0.422683	-0.341313	-0.320633	-0.325596
ALG12	0.206159	0.204634	0.213432	0.305627	0.203306	0.15676	0.213535	0.033645	0.135147	0.343192	0.137199	0.275251	0.0884913	0.280815	0.228523	0.290074	0.264445	0.174654	0.2095	0.235455	0.18811	0.239133	0.230163	0.173164	0.266278	0.145717	0.0954049	0.211096
ALG13	0.120547	0.142935	-0.045823	-0.0488188	-0.18714	-0.300145	-0.260079	-0.242845	-0.252077	-0.318931	-0.158803	-0.212172	-0.130496	-0.165445	0.0495746	-0.135734	-0.203185	-0.22392	-0.0870177	-0.0404623	-0.0195024	-0.0595568	-0.267119	-0.334957	-0.0620675	-0.0510421	0.0559855	-0.0939847
ALG14	-0.15324	-0.176059	-0.100096	-0.122741	-0.19322	-0.0608176	-0.183774	-0.120163	-0.267356	-0.161212	-0.213224	0.0327909	-0.270051	-0.174663	-0.159064	-0.169724	0.0323881	0.00963773	0.0563063	-0.0622007	0.0522751	-0.117594	-0.142434	0.15522	-0.372465	-0.033601	-0.257615	-0.160062
ALG3	0.0320801	0.309368	-0.163624	-0.250185	0.104544	-0.45292	0.108744	-0.42103	-0.0545319	-0.104912	0.0765475	-0.0778677	-0.0133597	-0.277876	0.0885982	-0.025059	-0.172769	-0.190614	-0.145812	-0.261939	-0.147324	-0.512948	-0.269023	0.0135603	-0.436341	-0.0101114	-0.1182	-0.00278847
ALG5	-0.989405	-0.634857	-0.945994	-1.29221	-1.11521	-1.29083	-0.746638	-1.15418	-1.30841	-0.783893	-0.97048	-1.08591	-0.836299	-1.36066	-0.939522	-1.23972	-1.06476	-0.887667	-1.09718	-1.25204	-1.2378	-1.40606	-1.47798	-1.71702	-1.19679	-1.34233	-1.24935	-1.05833
ALG9	-1.16065	-0.774984	-0.869483	-0.812266	-1.02815	-0.897677	-0.802686	-0.751159	-1.09885	-0.84798	-0.682159	-0.937056	-0.912144	-1.0124	-0.760832	-0.787018	-0.758208	-0.858218	-0.657425	-0.783618	-0.845015	-0.912669	-0.728131	-0.89274	-0.927438	-0.898503	-0.733741	-0.825959
ALK	0.0349707	0.0994467	0.0888107	0.205131	0.093944	0.318156	0.176743	0.133391	0.0100888	0.291796	0.0142269	0.337559	0.0166488	0.171109	-0.093007	0.176105	-0.0193713	0.104427	0.22741	0.0440502	-0.0803446	-0.0894584	0.256394	-0.0803446	0.122127	-0.0904236	-0.0541449	-0.0373254
ALKBH1	-0.167833	0.0521487	-0.0277849	-0.156522	-0.148076	-0.155991	0.0419326	-0.00576746	-0.109196	-0.162489	0.0585049	0.00656146	-0.150807	0.0709393	-0.0436732	0.0150877	-0.0926782	-0.0231329	0.169749	-0.0395424	0.0417598	-0.025059	0.0466697	-0.179332	0.0563063	0.0146308	0.122832	-0.094491
ALKBH3	0.897538	0.893406	0.626102	0.403987	0.722356	0.718794	0.780059	0.707687	0.806561	0.651407	0.573312	0.890749	0.813357	0.874943	0.81886	0.770497	0.575497	0.710011	0.402799	0.745496	0.621073	0.614593	0.552873	0.584913	0.613491	0.563354	0.521644	0.448695
ALKBH3-AS1	0.464568	0.608276	0.544231	0.466726	0.715703	0.407909	0.373394	0.454166	0.352186	0.33566	0.511397	0.308731	0.543369	0.348417	0.267436	0.124391	0.110719	0.198936	0.183468	0.210842	0.388685	0.201189	0.431532	0.211096	0.287949	0.228806	0.127467	0.287714
ALKBH5	-0.0260006	0.0629665	0.0321998	0.310429	0.130454	0.0656824	0.151915	0.116283	0.276586	0.184189	0.162878	0.0800271	0.508338	0.34635	0.458438	0.443454	0.471029	0.470626	0.423885	0.360636	0.422451	0.193112	0.328505	0.241405	0.391407	0.586602	0.535872	0.431532
ALKBH6	-1.04138	-1.03145	-1.61119	-1.14606	-0.87661	-1.01373	-1.11019	-0.932691	-1.22267	-1.27427	-1.32091	-1.23252	-1.31715	-0.814894	-1.05402	-1.45923	-1.06923	-0.994211	-0.991499	-1.01303	-1.15418	-0.67629	-1.03645	-1.0005	-1.27971	-1.17466	-1.22177	-1.07935
ALKBH8	-0.465796	-0.522005	-0.410329	-0.432964	-0.406835	-0.342335	-0.292213	-0.495558	-0.439939	-0.384616	-0.435222	-0.449399	-0.347897	-0.268834	-0.207543	-0.443219	-0.487478	-0.500348	-0.531896	-0.361448	-0.40854	-0.208469	-0.239291	-0.0373254	-0.259424	-0.18913	0.0498247	-0.357351
ALLC	0.152062	0.222354	0.195068	0.273654	0.149573	0.171324	0.232875	0.183088	0.14313	0.162812	0.189295	0.121863	0.168939	0.0541375	0.150024	0.0074778	0.0309788	0.0331209	-0.186138	0.0267265	0.0646193	0.0210521	0.133153	0.0143514	-0.00599069	0.144604	0.0502972	0.0110972
ALMS1	-0.685147	-1.00177	-1.38939	-1.37842	-0.743701	-1.181	-1.18193	-1.00236	-1.04138	-1.03235	-0.894496	-1.03774	-1.22809	-0.573689	-0.964666	-1.03388	-1.01635	-0.919271	-1.16254	-0.783893	-1.02322	-0.857434	-0.835465	-0.600962	-0.686006	-0.999231	-0.932691	-0.97583
ALOX12B	0.326031	0.600873	0.528698	0.337799	0.211825	0.176105	0.480979	0.186177	0.3542	0.459898	0.299647	0.454584	0.291796	0.176881	0.374441	0.374133	0.264946	0.199249	0.39879	0.224128	0.299248	0.15522	0.233901	0.082213	0.349506	-0.083454	0.374441	0.189081
ALOX12P2	-0.173869	0.0116637	0.011315	-0.255837	-0.15809	-0.325481	-0.0430687	-0.222732	-0.0664231	-0.268612	-0.163368	-0.210273	-0.121256	-0.240078	-0.109888	-0.342957	-0.125424	0.127995	-0.199366	-0.0100587	-0.183363	-0.27556	-0.397691	-0.280441	-0.367162	-0.173359	-0.28746	0.0405986
ALOX5	0.137759	-0.0338426	-0.0107011	0.0140127	-0.126166	-0.0317992	0.0486578	0.0315424	-0.00171052	-0.0355119	0.017642	0.078611	0.00119595	0.180166	-0.0619402	-0.130276	-0.0664658	0.251591	0.358665	0.0198884	-0.167587	-0.0687556	0.00246942	0.136341	0.129113	0.207623	0.174506	-0.0437851
ALOX5AP	0.0464407	0.222498	0.291114	0.222955	0.567177	0.363972	0.500676	0.713385	0.334556	0.88554	0.0627418	0.348973	0.181628	0.112475	0.163353	0.102339	-0.0382831	-0.021449	0.0062365	0.158186	0.23454	0.0128284	0.263076	0.214165	0.127807	-0.0880133	0.194406	0.287857
ALPK1	0.00387555	-0.0783252	0.0130206	0.122191	0.360008	0.153551	0.192313	0.0802516	0.0652774	0.120121	0.061367	0.0973446	-0.000958208	0.224583	0.0167795	-0.0619402	0.442197	0.00473144	-0.0535666	0.107165	0.189706	-0.167643	0.0447517	0.152535	0.0233966	0.116971	0.0181806	0.172928
ALPL	0.402601	0.134713	0.284596	0.453142	0.260095	0.361171	0.363877	0.483092	0.170863	0.254479	0.183779	0.0362001	0.0894122	0.175947	0.1841	0.2762	0.466726	0.0649795	0.0136941	0.210935	0.2316	0.268442	0.206668	0.409461	0.177001	0.131855	0.00706025	0.129233
ALPPL2	0.390794	0.2764	0.228978	0.221549	0.204156	0.260157	0.262233	0.208305	0.286324	0.235751	0.250171	0.314774	0.401234	0.540052	0.192719	0.313615	0.351259	0.34591	0.303447	0.247638	0.351342	0.262994	0.27204	0.199175	0.226121	0.225016	0.282013	0.280815
ALS2	0.170537	-0.00669244	0.231845	0.114711	0.127655	0.201554	0.0509541	0.162687	-0.0194391	0.0147406	0.0412377	0.116812	0.0148068	0.00764708	0.122191	-0.0629982	-0.205135	-0.205655	-0.125829	-0.0399204	0.20366	0.0759855	-0.152743	0.0567506	0.186048	0.0608431	-0.115487	0.149872
ALS2CL	-0.206752	-0.379576	-0.209924	-0.226321	-0.150281	-0.278608	-0.483091	-0.342335	-0.426919	-0.423261	-0.580922	-0.417779	-0.563918	-0.384926	-0.642228	-0.589834	-0.923819	-0.927842	-0.631802	-0.576159	-0.513108	-0.412798	-0.587944	-0.548455	-0.549221	-0.67597	-0.638761	-0.459819
ALS2CR11	0.184284	0.138827	0.308036	0.18274	0.322738	0.312487	0.04883	0.321853	0.243534	0.17421	0.162939	0.113505	0.203232	0.235751	0.119817	0.193743	0.0990478	0.0704693	0.0732013	0.059552	-0.0128261	0.0833005	0.155989	0.0260773	0.0858978	0.0829656	0.148187	0.135573
ALS2CR12	0.249917	0.423309	0.472802	0.137635	0.368555	0.21521	0.196591	0.167138	0.117089	0.170093	0.238839	0.251127	0.194489	0.0170328	0.265399	0.186244	0.160017	0.00815104	0.128929	0.23686	0.138218	0.210532	0.311164	0.276586	0.258155	0.0772547	0.196431	0.193645
ALX4	0.185757	0.0978996	-0.0216768	0.192565	0.262816	0.172181	0.166096	0.392087	0.157429	0.15664	0.155491	0.136798	0.0204843	0.294024	0.214884	0.151475	0.287088	0.268361	0.330942	0.268872	0.340174	0.278799	0.329274	0.0636877	0.387552	0.110896	0.279839	0.234632
ALYREF	-0.0849125	-0.474484	0.468982	-0.0315351	0.240078	0.19491	0.238592	0.149417	0.088906	-0.0600068	-0.139468	0.00861175	-0.117891	0.0123382	0.367481	0.0515656	-0.0720554	-0.22674	-0.13501	-0.152661	-0.114976	-0.0579395	0.233192	0.261406	0.114163	-0.0177594	0.228283	0.0199441
AMACR	0.116072	0.128966	0.145891	0.224068	0.158802	0.11237	0.194406	0.257724	0.208798	0.153908	0.220895	0.12226	0.0369798	0.192313	-0.0367213	0.193645	-0.208469	0.0577127	0.0210521	0.207479	0.238911	0.0710671	0.0544654	0.0885982	0.127284	0.0789246	0.203741	0.0620679
AMBP	-0.581577	-0.520991	-0.613572	-0.591998	-0.755139	-0.665817	-0.625668	-0.664066	-0.488352	-0.581425	-0.826269	-0.75786	-0.360582	-0.778355	-0.680719	-0.872674	-0.680966	-0.729777	-0.674445	-0.812967	-0.84798	-1.06708	-0.819841	-1.13613	-0.846027	-0.9861	-0.728488	-1.03774
AMBRA1	0.0827028	0.0163191	-0.0726117	-0.109806	0.0662006	-0.148249	-0.103148	0.0278597	-0.260364	-0.384142	-0.360289	-0.109091	-0.250282	-0.150608	-0.114927	-0.144615	-0.188566	-0.213422	-0.322601	0.0743327	0.0215296	0.0438415	-0.057584	-0.194837	0.0469926	0.0226768	0.00451685	-0.171304
AMD1	0.132982	0.362045	0.00851364	0.202042	0.241405	0.384243	0.072129	0.242318	0.559853	0.140775	-0.0357255	0.0201375	0.198797	0.244137	-0.0527072	0.195153	0.294519	0.189408	0.368414	0.323655	0.184022	0.0201375	0.298599	0.28023	0.126258	0.00706025	0.0107437	0.216993
AMDHD1	0.131718	0.425869	0.253308	-0.0253461	0.0760404	0.111181	0.102099	-0.155991	0.0992569	0.101285	-0.0413307	0.209624	0.358509	-0.0455708	0.0210521	0.025385	-0.0519068	0.216443	-0.0567726	-0.0665366	0.21568	0.306661	0.120547	-0.0422459	0.177424	-0.0268387	-0.420386	-0.170457
AMDHD2	0.198936	-0.125582	0.0142269	-0.110829	-0.222276	0.102099	0.328925	-0.140296	0.167801	0.168862	-0.165601	0.19761	0.232284	0.288296	0.420101	0.441668	0.388143	0.385108	0.406831	0.248112	0.378101	0.504518	0.593228	0.444028	0.208855	0.486125	0.516144	-0.116659
AMER2	-0.1851	0.144946	-0.0634367	0.0635077	-0.159984	0.0221547	0.0074778	-0.110892	-0.0486934	-0.0576601	-0.0655706	-0.165308	-0.0735027	-0.025291	0.0390749	0.0753665	-0.219314	0.033859	-0.0402382	0.0179158	0.0300316	0.0836414	0.262139	-0.105339	0.124256	0.0844633	-0.0702988	0.00996255
AMFR	-0.273196	-0.227305	-0.41	-0.171223	-0.140368	-0.191294	-0.047511	-0.220439	-0.214914	-0.0687181	-0.221658	-0.0512555	-0.143518	-0.135378	-0.202025	-0.09556	-0.124156	-0.443987	-0.230992	-0.267981	-0.227838	0.0449014	-0.158206	-0.264822	-0.215137	-0.266708	-0.347712	-0.144684
AMH	0.224653	0.0417046	0.0695893	-0.0499521	0.217106	0.0507681	-0.00374039	-0.0798848	0.226296	0.244448	0.0791006	0.18811	0.336408	-0.356665	0.125316	0.196008	0.176668	0.455861	0.166935	-0.534841	0.228676	0.318273	0.157572	0.258702	0.108174	-0.0532153	0.224369	0.083235
AMHR2	0.149812	0.179243	0.260224	0.156534	0.0464407	0.218833	0.191512	0.0990478	0.0114759	0.248989	0.161009	0.250397	0.156172	0.214548	0.189213	0.241888	0.214884	0.327686	0.133547	0.179032	0.122127	0.174954	0.41809	0.259941	0.406685	0.16497	0.456671	0.148644
AMIGO1	0.351033	0.388143	0.308287	0.423309	0.463697	0.371639	0.316355	0.352624	0.602721	0.506779	0.388143	0.567701	0.435894	0.357974	0.397113	0.214165	0.322204	0.361171	0.354306	0.315524	0.290074	0.240435	0.292795	0.323655	0.276586	0.306099	0.347188	0.272135
AMIGO2	-0.644474	-0.480519	-0.670265	-0.624982	-0.392341	-0.49837	-0.544347	-0.62925	-0.665265	-0.614103	-0.398324	-0.534426	-0.554087	-0.618425	-0.383167	-0.439173	-0.564426	-0.50588	-0.486693	-0.496075	-0.551759	-0.500348	-0.446468	-0.224709	-0.548455	-0.345553	-0.618229	-0.614589
AMMECR1	0.0966825	0.121575	0.186244	0.0559282	0.190068	0.123331	-0.0249204	0.112724	0.188526	0.110896	0.0839708	0.105005	0.101338	0.102099	0.0933352	-0.0421288	0.0074778	0.224583	0.108511	0.0195278	0.131645	0.200851	0.194087	-0.00477964	-0.00556143	0.178615	0.0697303	-0.00298488
AMMECR1L	0.00990315	0.0182601	-0.16217	0.116072	-0.105538	-0.129603	-0.0406629	-0.286272	-0.279798	-0.0906247	-0.3485	-0.134723	-0.126755	-0.39945	-0.131592	-0.442157	-0.250969	-0.253244	-0.217563	-0.270396	-0.378188	-0.203697	-0.159656	0.00223956	-0.337426	-0.0842484	-0.164019	-0.152516
AMOT	-0.252597	-0.119158	-0.185756	-0.710869	-0.512674	-0.617769	-1.01704	-0.554542	-0.74434	-0.656193	-0.665508	-0.592228	-1.12114	-1.15312	-0.986752	-0.894496	-1.07358	-0.67936	-1.06848	-1.11616	-0.739528	-0.644226	-0.71106	-0.786272	-0.870692	-0.794071	-0.957149	-0.497564
AMOTL1	0.318052	0.0770633	0.0506549	0.104597	0.200228	0.0767645	0.228283	0.413866	0.443208	0.368689	0.213923	0.371069	0.192174	0.330182	0.153551	0.333864	0.545064	0.552873	0.438905	0.373542	0.437818	0.370775	0.439089	0.251926	0.423885	0.182886	0.34235	0.203053
AMOTL2	-0.120316	0.163142	-0.339574	-0.568053	-0.265643	-0.434394	0.247894	-0.33013	-0.299778	-0.214828	0.177742	-0.0361401	-0.756159	-0.102267	0.0544654	0.220895	0.0821236	0.265527	0.604982	0.398292	0.717558	0.358665	0.337559	0.170819	0.00106009	0.400412	0.528698	0.0158852
AMPD1	-0.0949198	0.28162	0.0870943	0.0865703	0.0472935	-0.111717	-0.037492	-0.0295112	0.108869	0.0371825	0.0637489	-0.127792	0.0079684	-0.101184	-0.0690795	-0.173869	-0.267981	-0.367162	-0.216883	-0.105153	-0.127439	0.0430548	0.110606	0.0216784	0.0388135	-0.0923184	0.0970426	0.119277
AMPD2	-0.145655	-0.22355	0.317769	-0.00803642	0.28963	-0.0596814	0.0331209	-0.0399204	-0.122944	0.101218	0.0364707	-0.117011	-0.00550448	-0.297367	0.078611	-0.206311	-0.177687	-0.0651096	-0.162008	-0.111033	-0.0845988	-0.044593	-0.158913	-0.184227	-0.0159772	0.0335296	-0.279087	-0.00171052
AMPD3	-0.172769	-0.20271	0.00532757	-0.340357	0.0144107	-0.26744	0.0158295	-0.178708	-0.10307	-0.126065	-0.282149	0.00827087	-0.208616	-0.361573	-0.133202	-0.217255	-0.320475	-0.286444	-0.612904	0.0380258	-0.21356	-0.253369	-0.216378	-0.235694	-0.333933	-0.0898694	0.111569	-0.271257
AMPH	0.0575593	0.0969108	0.124391	0.0170328	-0.0537826	0.00950144	0.18069	0.0332371	-0.0728813	0.161009	-0.0186491	0.132823	0.158261	0.0294358	0.114046	-0.0517603	0.0697974	0.057773	0.0584455	0.0142885	0.0495097	0.260095	0.00950144	0.242497	0.35881	0.427743	0.343977	0.153085
AMT	0.518245	0.20817	0.149494	0.141941	0.150424	0.264023	0.223633	0.2452	0.171602	0.376572	0.164575	0.388816	0.143872	0.256486	0.201626	0.284771	0.302137	0.141197	0.203971	0.177742	0.238839	0.253027	0.35974	0.282013	0.348267	0.382468	0.380388	0.22191
AMY2B	0.111181	-0.0634776	0.00401289	-0.121256	0.126602	0.327477	-0.435222	0.0912775	-0.218679	0.0689908	-0.0411911	-0.0608176	-0.0827916	-0.209221	-0.486161	-0.131046	0.185213	-0.122081	-0.0166507	0.105057	0.189556	0.191956	0.171522	0.111683	0.0158852	-0.0823946	-0.135588	0.187299
AMZ1	0.267185	0.278607	0.394217	-0.0569933	0.166935	0.415477	0.096257	0.0979972	0.635175	0.536722	0.536981	0.336632	0.484046	0.495571	0.50863	0.323296	0.499915	0.461142	0.330442	0.386678	0.677777	0.48227	0.41715	0.368029	0.506779	0.599895	0.688973	0.613491
AMZ2	-0.507494	-0.691116	-0.230913	-0.131238	-0.292776	-0.365437	-0.490115	-0.0861235	-0.189448	-0.523852	-0.343203	-0.48342	-0.386383	-0.293908	-0.479513	-0.170029	-0.0517603	-0.311403	-0.506749	-0.273526	-0.427055	-0.29918	-0.2484	-0.223464	-0.171223	-0.352106	-0.00867557	-0.209157
ANAPC1	-0.937937	-1.09955	-0.848395	-0.917739	-1.08105	-0.905293	-0.836299	-0.696602	-1.20067	-0.961269	-1.05548	-1.05906	-0.977131	-1.03235	-0.950002	-0.930872	-0.737014	-0.759166	-0.965157	-0.968665	-0.820132	-0.856608	-1.05986	-0.854141	-0.815349	-0.851307	-0.926406	-0.890741
ANAPC10	0.279937	0.370445	0.623727	0.220278	0.50205	0.234632	0.462116	0.388935	0.488338	0.475952	0.288102	0.368127	0.373088	0.159711	0.593228	0.613933	0.406545	0.528698	0.40209	0.329034	0.400225	0.448171	0.398138	0.533929	0.420101	0.553211	0.536293	0.380264
ANAPC11	0.00129976	-0.149127	-0.109374	0.0746676	-0.160229	0.0531987	-0.41851	-0.487581	-0.15809	-0.193775	-0.220938	0.176288	0.0438865	-0.258709	-0.0325437	-0.229757	-0.101324	-0.0473257	-0.0845377	-0.00741749	-0.314684	-0.262029	-0.0594783	0.106494	-0.0496905	-0.360582	-0.142875	-0.0131836
ANAPC13	-0.00139239	-0.112478	-0.0843711	-0.173293	-0.247129	-0.270525	-0.0338942	-0.213819	-0.0531061	-0.34448	0.174869	-0.260364	0.0386751	0.10996	0.302782	0.514625	0.370294	0.205286	0.351598	0.563354	0.27059	0.501735	0.422451	0.453626	0.355497	0.426902	0.6461	0.595533
ANAPC15	0.0695339	0.14839	0.0957029	0.0802516	0.034412	0.151619	0.0247163	0.152123	0.0998276	0.111683	0.131323	0.135269	0.284371	0.176668	0.00362967	0.0703405	0.160751	0.147062	0.0556478	0.23082	0.146935	0.170927	0.138827	0.034253	-0.0443322	0.145188	-0.0671376	-0.0429623
ANAPC16	0.430158	0.353299	0.484645	0.749612	0.756819	0.620541	0.428156	0.76499	0.5574	0.410492	0.440374	0.290858	0.402442	0.379431	0.416061	0.458438	0.677256	0.167955	0.434311	0.663902	0.48227	0.55908	0.520763	0.780059	0.678533	0.478169	0.451366	0.750454
ANAPC5	-0.512948	-0.584262	-0.462102	-0.662632	-0.443851	-0.620905	-0.556436	-0.648867	-0.585741	-0.481937	-0.616246	-0.449742	-0.770672	-0.555975	-0.685147	-0.498937	-0.535565	-0.682444	-0.531364	-0.498937	-0.808238	-0.623668	-0.53101	-0.64279	-0.574467	-0.72134	-0.746989	-0.767997
ANGEL1	-0.0680556	-0.199198	-0.045524	-0.177847	0.0372366	0.0451016	-0.0709608	0.0498247	-0.0582795	-0.265179	-0.395959	-0.289113	-0.480519	-0.202913	-0.377409	-0.152969	-0.332411	-0.657425	-0.522186	-0.381943	-0.187799	-0.372713	-0.408694	-0.403269	-0.377797	-0.56313	-0.53539	-0.325481
ANGEL2	-0.409174	-0.580339	-0.413651	-0.560079	-0.42883	-0.482589	-0.46395	-0.401735	-0.35564	-0.392815	-0.627051	-0.565438	-0.551561	-0.29596	-0.673834	-0.642002	-0.574243	-0.762131	-0.676634	-0.583497	-0.535999	-0.574467	-0.550478	-0.468933	-0.540488	-0.573689	-0.683179	-0.615042
ANGPT2	0.227844	0.119049	0.279099	0.232284	0.169884	0.130092	0.132628	0.142085	0.109696	0.148057	0.0801974	0.185809	0.11553	0.20291	0.0403554	0.118739	0.106283	0.082634	0.123066	0.0809738	0.0927454	0.170685	0.12538	0.0654578	0.131268	0.105115	0.119614	0.0648033
ANGPTL1	-0.116319	0.111683	-0.0442499	-0.187712	-0.0342083	-0.0755918	-0.233936	-0.174437	0.0347275	-0.0104181	-0.0789713	-0.135875	-0.123643	-0.0107011	-0.0793482	-0.150544	-0.307762	-0.257047	-0.241601	-0.19322	-0.316444	-0.137267	-0.325857	-0.0592049	-0.110829	-0.0993253	-0.288917	-0.427055
ANGPTL2	-0.330583	0.0458705	0.0714856	0.384397	-0.0704195	0.0239567	0.28611	0.15269	0.0180655	0.188593	0.0599604	0.0751813	0.309749	0.244227	0.287628	0.185883	0.103958	0.206159	0.0473715	0.0971115	0.215403	0.253437	0.101338	0.0864419	-0.0160469	0.236621	0.0213428	0.627235
ANGPTL3	0.720385	0.588807	1.06214	0.243619	0.545815	0.810131	0.396971	0.539271	0.889323	1.46436	0.567454	0.967042	0.96539	0.682871	0.594767	0.422093	0.374441	0.205216	0.346185	0.293794	0.831433	0.58573	0.301847	0.219338	0.65483	0.821219	0.9619	0.562399
ANGPTL4	0.035683	0.132932	-0.142211	0.171659	0.00601134	0.179578	0.13459	0.16041	0.0170328	0.305097	0.111072	0.270409	0.220895	0.216384	0.224369	0.1194	0.367009	0.28245	0.0839032	0.197676	0.196683	0.213746	0.181333	0.20343	0.0824323	0.139029	0.537792	0.184718
ANGPTL7	0.0495097	0.181138	0.155353	0.203587	0.183395	0.161408	0.177001	0.140504	0.0900073	0.0445422	0.271429	0.143812	0.14313	0.267672	0.20092	0.140775	0.128563	0.136798	0.0585668	0.224653	0.106548	0.155825	-0.0753816	0.123066	0.111372	0.161338	0.0316602	0.0132907
ANHX	0.0355574	0.0757317	-0.176162	-0.0785218	0.247894	-0.0765987	0.0476929	-0.0171907	0.0566698	0.087314	0.0638008	-0.112875	-0.0836826	-0.0305547	-0.0500936	-0.0978489	-0.057584	0.10345	0.256178	-0.0325437	-0.11523	0.136609	0.172728	0.365597	0.308119	0.361058	0.258642	-0.0350067
ANK1	0.632626	0.548007	0.73816	0.909879	0.8523	0.712588	0.726559	0.523332	0.730553	0.658672	0.711919	0.553457	0.675149	0.577924	0.386004	0.482802	0.384243	0.505047	0.483092	0.519036	0.630461	0.612858	0.532407	0.349506	0.574221	0.534767	0.650892	0.550158
ANK3	-0.169168	-0.257308	-0.239639	-0.23738	-0.143736	-0.137267	-0.217255	-0.0584689	-0.242214	-0.108775	-0.286157	-0.163624	-0.200862	-0.0687181	-0.152743	-0.357471	-0.161723	-0.153545	-0.330972	-0.223258	-0.354711	-0.249479	-0.272238	-0.110584	-0.321671	-0.275381	-0.306898	-0.205026
ANKDD1A	0.270227	0.56817	0.298599	0.139148	0.190782	0.158186	0.227083	0.292022	0.608276	0.474041	0.291477	0.460654	0.552521	0.48978	0.312841	0.276302	0.407689	0.322089	0.416061	0.241888	0.381649	0.648946	0.390665	0.170371	0.351727	0.488064	0.550927	0.30059
ANKDD1B	-0.0485186	0.0057649	-0.0191251	-0.119355	0.00649391	-0.108343	-0.00841404	0.0909711	-0.101386	-0.124156	0.100506	-0.16819	0.0117241	-0.119408	-0.202474	-0.170261	-0.0171363	-0.149222	-0.149734	-0.143292	-0.0046743	-0.130081	-0.12718	0.0282656	-0.270637	-0.0758101	0.0685128	-0.26526
ANKEF1	-0.678443	-0.855486	-0.604053	-0.560699	-0.769941	-0.767022	-0.832555	-0.601999	-0.526886	-0.661001	-0.738758	-0.489338	-0.276983	-0.576159	-0.959156	-0.863746	-0.503371	-0.635756	-0.846776	-0.782013	-0.537742	-0.593544	-0.566936	-0.7193	-0.962176	-0.780702	-0.723063	-0.852614
ANKFY1	0.0141797	0.012429	0.142769	0.000261935	0.0971115	0.0153222	-0.0192461	0.233384	-0.0521913	-0.0274963	0.0315424	-0.0115295	-0.0432936	0.0223202	0.0273541	-0.177359	0.0508855	-0.0408428	-0.0862871	-0.0235227	0.0191972	-0.10889	0.00218975	-0.0967654	-0.119158	-0.0283545	-0.128094	-0.165445
ANKH	-0.0679779	-0.021083	-0.14419	-0.0500936	-0.011989	-0.0687181	-0.177025	0.026356	0.0953478	-0.137599	-0.0297444	0.106874	-0.0274359	-0.114361	-0.142434	0.0206751	-0.148569	-0.0439847	-0.106899	-0.0551586	-0.171646	-0.144458	-0.190823	-0.0181397	-0.103711	-0.0419647	-0.0984788	-0.149127
ANKHD1-EIF4EBP3	-0.0713326	-0.0147195	0.0952889	-0.000188308	-0.133336	-0.0241184	0.00233869	0.0624901	-0.0280116	-0.037492	-0.0958479	-0.102849	-0.088475	0.0889526	-0.063362	-0.0901193	-0.208934	-0.186639	-0.0778677	-0.0746559	-0.0224956	-0.0883865	-0.0346306	-0.0604909	0.0274683	-0.143365	-0.13112	0.0536734
ANKIB1	-0.433929	-0.342335	-0.229643	-0.551972	-0.280066	-0.37035	-0.657905	-0.609393	-0.580145	-0.745964	-0.474994	-0.414134	-0.5329	-0.590941	-0.779575	-0.513108	-0.655128	-0.382564	-0.334863	-0.0027269	-0.436994	-0.458344	-0.757158	-0.737014	-0.392341	-0.601482	-0.803022	-0.435827
ANKLE1	-0.109196	-0.212097	-0.292836	-0.462244	-0.142809	-0.28516	-0.474833	-0.515028	-0.479837	-0.508656	-0.509033	-0.465656	-0.38401	-0.646672	-0.83086	-0.322952	-0.634018	-0.840313	-0.621091	-0.3175	-0.273196	-0.616459	-0.256559	-0.332793	-0.310718	-0.351992	-0.559217	-0.424567
ANKMY1	-0.490777	-0.598983	-0.496358	-0.50773	-0.476742	-0.550729	-0.727846	-0.446881	-0.74262	-0.390464	-0.718829	-0.233448	-0.333933	-0.671327	-0.265345	-0.238881	-0.473723	-0.394163	-0.350124	-0.396434	-0.41265	-0.329133	-0.224036	-0.18494	-0.495558	-0.0509056	-0.244099	-0.435624
ANKMY2	-0.0434965	-0.214728	-0.0409044	-0.210018	-0.251675	-0.0879578	-0.263544	0.0122363	-0.16162	-0.385882	-0.208528	-0.0714038	-0.24734	-0.144114	-0.116068	0.0968571	0.108461	0.0146308	0.0498247	0.0636877	0.0492059	-0.0903772	0.00394139	0.0760404	0.0763715	0.0282125	0.0645379	0.0816234
ANKRA2	-0.134648	-0.102613	-0.101148	-0.203096	-0.14543	-0.289738	-0.266708	-0.406835	-0.156522	-0.157157	-0.160852	-0.10272	-0.0770365	-0.330482	-0.260364	-0.141591	-0.190095	-0.0812265	-0.252186	-0.119158	-0.267119	-0.0622007	-0.196002	-0.304507	-0.195824	-0.119158	-0.255245	-0.297482
ANKRD11	-0.0111691	0.0837692	0.163006	-0.0302761	0.0741469	0.125665	0.109363	-9.2798e-05	0.269752	0.283173	0.1391	0.0701628	0.0470481	0.117642	-0.0263117	0.237958	0.152211	0.0249824	0.164744	0.225823	0.286717	0.0572316	0.00990315	0.116812	0.151132	-0.0155261	-0.0686668	0.0186346
ANKRD12	-0.145199	-0.550478	-0.64532	-0.490434	-0.33162	-0.49478	-0.625472	-0.275835	-0.452599	-0.661303	-0.569653	-0.444917	-0.691564	-0.334282	-0.476742	-0.573526	-0.603375	-0.628246	-0.714977	-0.41291	-0.579453	-0.612659	-0.565697	-0.50007	-0.512948	-0.723626	-0.594779	-0.63359
ANKRD13A	-0.114421	-0.19432	0.00142818	-0.0119105	-0.0200577	0.0349707	-0.151932	0.105229	-0.204939	-0.0221593	-0.132073	-0.170817	-0.317781	-0.0311565	-0.061367	-0.182348	-0.258637	-0.033072	-0.257308	-0.00537551	0.184718	0.00441245	0.0257042	-0.125582	0.105115	-0.247683	-0.0343795	-0.345124
ANKRD13C	-0.293244	0.167955	-0.388476	0.366191	-0.508272	-0.46763	0.581125	-0.579221	-0.217633	0.155119	0.445967	-0.3634	-0.0249204	-0.0762469	-0.435022	0.29025	-0.195147	0.109179	0.38296	-0.0125338	-0.162248	-0.0687181	-0.543219	-0.0529596	-0.123743	0.190971	0.462341	-0.172502
ANKRD13D	-0.33013	-0.0400299	-0.320633	-0.480823	-0.122228	-0.2499	-0.113156	-0.114232	-0.153688	-0.586214	0.132982	0.0195966	-0.0785218	-0.283184	-0.230307	-0.321163	-0.298949	-0.243606	-0.179253	-0.0994552	-0.16522	-0.211039	-0.0159772	-0.369776	-0.417919	-0.179188	0.0366455	-0.230759
ANKRD17	-0.447543	-0.399258	-0.507167	-0.587531	-0.568719	-0.513108	-0.436141	-0.595007	-0.485657	-0.521209	-0.485292	-0.530672	-0.593323	-0.41481	-0.373675	-0.40882	-0.463096	-0.505684	-0.410329	-0.533464	-0.49837	-0.493608	-0.424093	-0.421356	-0.57473	-0.580339	-0.492926	-0.568053
ANKRD18A	-0.233375	0.214073	0.337919	0.615031	0.22097	0.0389313	0.437479	0.283539	0.360636	0.399087	0.435514	0.07429	0.282516	0.0390749	0.365905	0.0493689	0.143974	0.186679	0.540052	0.0179628	0.118614	0.0727782	0.202757	-0.146773	0.0748052	0.0315424	0.0894623	0.253697
ANKRD2	2.08523	0.631046	0.357974	1.23727	0.998023	0.653642	3.62488	-0.185496	0.870337	0.979411	2.3706	0.577924	0.660458	1.24949	0.788781	2.058	0.604358	1.96017	1.48144	1.93527	1.52765	1.54537	1.61309	1.89709	0.637615	1.78779	1.83512	-0.00605545
ANKRD20A5P	0.0195278	0.179773	0.0985211	-0.0914875	0.0148632	-0.170599	0.0566698	0.0114078	0.0346722	0.0186346	0.0789246	-0.197952	0.0204211	-0.0852521	-0.000610234	-0.186639	0.0761313	0.202834	-0.181499	-0.0336695	-0.135076	0.0413366	0.116283	0.0471869	-0.271059	-0.0720554	0.0409122	-0.00703545
ANKRD23	-0.396007	-1.09572	-0.627538	-0.167587	-0.398463	-0.509255	-1.35351	-0.65474	-0.117311	-0.58726	-0.598983	-0.273661	-0.341313	-0.462941	-0.3653	-0.400175	0.0294858	-0.067457	-0.506951	-0.069393	0.0663189	-0.342694	-0.397176	-0.0952655	-0.183459	-0.204271	-0.807782	0.499455
ANKRD26	0.407545	0.264871	0.241472	0.08596	0.326149	0.174954	0.443804	0.145313	0.23063	0.0118733	0.166861	-0.0165434	0.21167	0.179364	0.222802	-0.017822	-0.0130079	0.0687955	0.35203	0.140835	-0.0590792	-0.177936	0.211725	-0.0540232	0.39366	-0.0140001	0.164659	0.149758
ANKRD26P1	0.121807	0.138399	0.418399	0.189213	0.287435	0.158588	0.0931495	0.251384	0.00190032	0.208798	0.214482	0.223035	0.0866727	0.28611	0.148001	0.035091	-0.152661	0.0491478	0.312241	0.203587	0.243805	-0.0734369	0.160275	0.0362001	0.0275991	0.12931	0.138138	0.139965
ANKRD28	-0.135538	-0.204172	-0.0749884	-0.0878384	-0.198037	-0.131766	-0.403506	-0.349742	-0.241115	-0.128429	-0.306063	-0.239972	-0.0358134	-0.429805	-0.31056	-0.243909	-0.20761	-0.160062	-0.420063	-0.214176	-0.111252	-0.148828	-0.0114811	-0.305832	-0.0867064	-0.0270696	-0.0801077	-0.247413
ANKRD29	-0.200862	0.00566364	-0.0477666	0.0284356	-0.180565	-0.228899	-0.427407	-0.135734	0.0375956	-0.0859951	0.046206	-0.0825762	0.0995981	-0.210812	-0.206643	-0.307131	0.0665237	0.11009	-0.093007	-0.117311	-0.0876809	0.00827087	-0.291628	-0.101184	-0.121458	-0.0446569	-0.107601	-0.0459836
ANKRD30A	-0.111646	-0.00529317	0.1369	-0.13836	0.0653933	0.0770633	-0.0255728	0.0430083	-0.114421	-0.315371	0.132237	0.137759	0.113818	-0.161941	-0.0777522	-0.107467	-0.0540232	-0.187644	-0.194938	-0.129114	-0.0381342	0.117754	-0.0646865	-0.149676	0.146412	-0.0627283	0.0592584	0.0636122
ANKRD30BL	0.296533	0.685251	0.375411	0.442017	0.271327	0.408289	0.157775	0.237896	0.542941	0.398292	0.10996	0.252849	0.311036	0.362628	0.171602	0.0409122	0.108869	0.111626	0.335848	0.0233434	0.433382	0.261632	0.170017	0.0391958	0.156096	0.267672	0.059552	0.214383
ANKRD33B	-0.0276231	-0.018603	-0.00639847	0.116933	-0.0769051	0.0911537	0.0394895	0.0223922	-0.0422459	0.0900073	0.0783381	0.101338	-0.0440507	-0.0443322	0.267126	0.0369798	0.170216	0.210395	0.161009	0.0529428	0.0952889	0.193823	-0.0321134	0.411321	0.0876273	0.0821724	0.47186	0.199381
ANKRD35	-0.118575	0.216025	-0.0861756	-0.102195	0.11009	-0.0369911	-0.0603397	-0.309411	0.0121728	0.0816234	-0.0676485	0.00833551	-0.00537551	0.0447162	-0.347897	0.0605321	-0.0496243	-0.323519	-0.160144	-0.0490055	-0.219742	-0.12592	-0.371345	-0.23738	-0.174112	-0.305317	-0.188018	0.0660901
ANKRD36B	0.266007	0.263674	0.481577	0.200123	0.196079	0.291796	0.193026	0.21694	0.178074	-0.007473	0.202676	0.111072	0.118299	0.0215296	-0.0332743	-0.0373254	-0.112042	0.0986633	-0.113341	0.113685	0.0882811	0.133153	-0.0445281	-0.0933579	-0.0806427	-0.00247066	-0.180309	-0.250353
ANKRD36BP1	0.126718	0.251747	0.217587	0.0198252	0.0852365	0.514333	0.07027	0.463697	0.287949	0.39777	0.11553	0.450482	0.495277	0.266007	0.112475	0.00196268	-0.124458	0.452173	0.188778	0.00218975	0.0805662	0.173652	0.380112	0.228628	0.237307	0.0511893	0.203365	0.309138
ANKRD37	-0.0233649	-0.227838	-0.0623123	-0.0355119	0.0234768	-0.0706439	-0.131468	-0.0978489	0.0166994	-0.0391371	0.0567506	-0.121955	0.00700416	-0.109091	0.00555294	-0.0221593	0.00176039	-0.106681	-0.0339477	-0.127103	-0.0461903	-0.19304	0.0445422	0.0664589	-0.192637	-0.0781996	0.0818408	0.149494
ANKRD39	0.159952	0.257323	0.293234	0.395869	0.385756	0.15302	0.205131	0.22288	0.401085	0.269336	0.100985	0.401234	0.404169	0.455004	0.177656	0.437479	0.479653	0.450764	0.469848	0.130875	0.397926	0.320658	0.172236	0.385224	0.360385	0.220604	0.293614	0.268185
ANKRD40	-0.450409	-0.340991	-0.214285	-0.1418	-0.143518	-0.234875	-0.316706	-0.193297	-0.127525	-0.257238	-0.238238	-0.286272	-0.145199	-0.0637995	-0.34815	-0.302681	-0.284503	-0.274042	-0.295655	-0.416087	-0.0296776	-0.179253	-0.157898	-0.281315	-0.297821	-0.133777	-0.0802333	-0.108822
ANKRD42	0.106174	0.229569	0.16497	0.197022	0.129992	0.27698	0.100565	0.224954	0.105168	0.270409	0.200365	0.28245	0.30143	0.179315	0.119686	0.218507	0.102473	0.149758	0.166361	0.200771	0.0405479	0.271652	0.127343	0.0267879	0.154419	0.108124	0.0666761	0.128482
ANKRD44	-0.180987	-0.267707	-0.173016	-0.180565	-0.282773	-0.169002	-0.200473	-0.28568	-0.281404	-0.20096	-0.13501	-0.119047	-0.194005	-0.053443	-0.206395	-0.0479622	-0.281856	-0.131766	-0.18494	-0.102122	-0.209924	-0.103251	-0.154345	-0.265643	-0.0973965	-0.209079	-0.178016	-0.192378
ANKRD45	0.316355	0.261895	0.417731	0.262913	0.68771	0.309242	0.277576	0.152857	0.307229	0.135763	0.262742	0.174116	0.363443	0.00522726	0.0712543	0.238911	0.106494	0.199381	0.220818	0.100115	0.0114759	0.345067	0.129992	0.388685	0.11728	0.127241	-0.016104	0.133609
ANKRD46	-0.837958	-0.845485	-0.761151	-0.903327	-0.869011	-0.878819	-0.825959	-0.64701	-0.899881	-1.04905	-0.86749	-0.964666	-1.03078	-1.0833	-0.79202	-0.669146	-0.413039	-0.729515	-0.766358	-0.742382	-0.541924	-0.632041	-0.665265	-0.614333	-0.617769	-0.551972	-0.641539	-0.566555
ANKRD49	0.0603234	0.187075	0.0671096	0.194336	0.257096	-0.167966	0.0965591	-0.175026	0.230359	0.0835818	0.251127	0.313246	0.111372	0.404169	0.0501899	0.0571166	0.0430083	0.372256	0.239208	0.332257	-0.0969225	0.484645	-0.217917	0.209573	0.0236114	0.235913	-0.132456	0.43661
ANKRD50	-0.0257103	-0.0303384	-0.152303	-0.103148	-0.00456226	-0.163064	-0.0306936	-0.0664231	-0.334569	0.0295417	0.0626103	-0.333803	-0.356665	-0.122944	-0.148663	0.0053995	0.0485347	-0.124663	-0.0859951	-0.0376246	-0.0450768	-0.275068	-0.210273	-0.151001	-0.0896097	-0.266203	0.208305	-0.0982087
ANKRD55	-0.122882	-0.178633	0.0436283	-0.333068	0.0214915	-0.155719	-0.135076	-0.117311	0.0755277	-0.0172505	-0.0355119	-0.0697379	0.0418677	-0.0123793	-0.0331211	-0.116239	-0.148663	0.00504268	-0.0120618	-0.0157275	-0.0571428	-0.166659	0.0957448	0.241252	0.0801974	0.170819	0.0241254	-0.0663728
ANKRD6	0.0987668	0.256394	0.224583	0.150691	0.159574	0.0701176	-0.0440507	0.126543	0.0967971	0.059672	0.148705	0.0884241	0.0972091	-0.00477964	0.0896154	-0.0498985	-0.104634	-0.0843026	-0.157263	-0.198288	-0.0270112	-0.103792	0.0266212	0.0867913	0.0102509	-0.156176	0.102663	0.000146169
ANKRD7	0.330817	0.193244	0.435136	0.213833	0.308814	0.437991	0.0978409	0.334448	0.282836	0.353556	0.465043	0.536981	0.25379	0.433143	0.235375	0.391524	0.145375	0.368029	0.268872	0.555105	0.338519	0.125316	0.249275	0.28963	0.311164	0.441274	-0.0201869	0.450764
ANKS1A	0.426434	0.34235	0.385108	0.293234	0.239655	0.395545	0.285616	0.504796	0.501086	0.567701	0.318587	0.452002	0.483304	0.375494	0.424918	0.495571	0.433382	0.361892	0.362474	0.355367	0.466726	0.348129	0.407909	0.405145	0.346185	0.298599	0.323522	0.291392
ANKS1B	0.252849	0.290074	0.271731	0.262816	0.281515	0.211348	0.286609	0.318363	0.236774	0.188325	0.243928	0.258549	0.334353	0.362759	0.332133	0.360825	0.36733	0.424511	0.310935	0.361058	0.36324	0.399268	0.374917	0.149681	0.125255	0.158116	0.167473	0.24702
ANKS3	0.00246942	0.201189	0.158588	0.0852771	0.22751	0.307571	0.373542	0.202676	0.196743	0.147367	0.22664	0.351462	0.279177	0.0726052	0.0816234	0.272335	0.0708808	0.240793	0.0181243	0.197942	-0.068125	0.16222	-0.0128261	0.397586	0.150082	0.193958	0.0917252	0.171177
ANKS4B	0.0768227	-0.154048	0.0902309	0.0568078	0.0202983	0.082213	0.0665237	0.0357901	0.00570595	-0.105215	-0.020957	0.00246942	-0.0342774	-0.238372	-0.225333	-0.114843	-0.0347338	-0.370986	-0.190257	-0.104995	-0.16242	-0.334957	-0.20761	-0.211719	-0.261851	-0.313457	-0.288801	-0.241208
ANKS6	-0.655324	-0.238372	-0.0482539	-0.434394	-0.467035	-0.139411	0.0213428	0.0132907	-0.290365	-0.297064	0.00733906	-0.218349	-0.203096	-0.24684	-0.147071	-0.0989884	-0.171379	-0.456191	-0.199014	-0.429647	-0.0402382	-0.406702	-0.140446	0.115897	-0.0299313	-0.140229	-0.37467	-0.296224
ANKZF1	-1.06307	-1.13005	-0.858742	-0.89274	-1.22059	-1.34387	-1.42707	-1.2388	-1.0005	-0.880084	-1.07935	-1.13455	-0.803022	-1.10352	-1.09135	-0.947531	-0.651102	-0.837528	-0.70693	-0.955625	-0.767665	-0.794691	-0.902297	-0.688614	-0.91831	-0.784289	-0.888175	-0.642002
ANLN	-0.432964	-0.218679	-0.354016	-0.211373	-0.420857	-0.377409	-0.789654	-0.832946	-0.558587	-0.652213	-0.562965	-0.6161	-0.290365	-0.980837	-0.668092	-0.703232	-0.943604	-0.628012	-0.471127	-0.703232	-0.730895	-0.630069	-0.94916	-1.38764	-0.775648	-0.725412	-0.852989	-0.952871
ANO1	0.210244	0.199535	0.23686	0.279099	0.386678	0.249365	0.338184	0.372519	0.157242	0.310935	0.227982	0.122393	0.0963621	0.169086	0.343708	0.138138	0.145891	0.177805	0.146089	0.155353	0.229357	0.131901	0.185809	-0.0670842	0.16222	0.138012	0.205642	0.105639
ANO10	-0.0621293	-0.0350911	-0.246727	0.0641594	-0.158607	0.0749215	0.0178508	0.0106254	-0.0485937	-0.079417	-0.0539585	-0.0478194	0.0540808	-0.0450014	0.0915068	0.372119	0.145815	0.311292	0.0685128	0.118614	0.233384	0.0212895	-0.0966867	0.200047	-0.21309	0.00406591	0.121342	0.0863674
ANO3	0.163472	0.0687955	0.149927	-9.2798e-05	0.0882811	0.0384899	0.0955213	-0.123827	0.163424	0.0540808	0.12226	0.131323	0.0757816	-0.154107	0.201554	-0.0163974	-0.0599608	0.163538	0.0761948	-0.0203717	-0.0272582	-0.0492583	0.125665	-0.058074	-0.0463179	-0.198854	-0.23738	-0.023906
ANO4	0.00879511	-0.0538849	-0.0287991	0.0679245	0.0293599	0.0505883	0.165855	-0.121722	0.0740785	0.0691566	-0.0296155	0.0483949	0.123401	0.107903	0.111312	-0.203899	-0.1182	0.0490945	0.0430083	-0.196388	-0.0926099	0.0216123	-0.202474	0.0530256	-0.0292197	0.134456	0.0545963	-0.249666
ANO5	0.330027	0.226856	0.179497	0.0102509	0.108807	0.170017	-0.0828519	0.360102	0.385572	0.153222	0.319783	0.310759	0.158959	0.42028	0.495802	0.292904	0.472994	0.368775	0.351907	0.453142	0.413419	0.144759	0.403025	0.500185	0.364187	0.247638	0.346943	0.576646
ANO6	-0.663717	-0.506251	-0.573689	-0.576368	-0.811504	-0.655588	-0.496358	-0.612904	-0.608531	-0.564139	-0.694822	-0.497564	-0.635994	-0.629008	-0.671327	-0.714215	-0.651928	-0.362625	-0.733741	-0.760084	-0.543828	-0.530672	-0.592857	-0.511225	-0.575364	-0.36302	-0.493608	-0.490115
ANO7	0.316711	0.288497	0.3319	0.409273	0.23063	0.298923	0.274662	0.229357	0.366531	0.362759	0.32815	0.173294	0.343708	0.274022	0.126258	0.239133	0.22114	0.240609	0.321223	0.236469	0.309047	0.235913	0.347434	0.29192	0.296908	0.311886	0.302392	0.290949
ANO9	0.791192	0.434902	0.641982	0.457513	0.680203	0.509437	0.597824	0.599895	0.722356	0.385404	0.517385	0.644784	0.440137	0.173086	0.516409	0.480742	0.27224	0.292363	0.437095	0.486125	0.424064	0.622821	0.648946	0.650317	0.673798	0.633803	0.718203	0.847656
ANP32A	-0.00352307	-0.0463803	-0.123908	-0.0818177	-0.0382831	-0.0352882	-0.0817641	-0.0995178	-0.125256	-0.0531551	-0.118427	-0.0216768	-0.148828	-0.188778	-0.0910203	-0.159437	-0.0554255	-0.10155	-0.0899948	-0.100225	0.0571166	-0.124005	-0.0657496	0.00410759	-0.111784	-0.0311565	0.0186812	-0.169402
ANP32B	-0.0439847	-0.116068	-0.0463803	-0.0328853	-0.0268859	0.0772547	-0.195045	0.00342703	-0.0813627	-0.197604	-0.0176229	-0.125507	-0.188463	0.0115912	0.0517466	-0.0992401	-0.185324	0.0129445	0.0487738	-0.0995178	-0.198737	-0.0243062	-0.0275569	0.0193423	0.0619022	-0.0477176	-0.168836	-0.0635344
ANP32E	-0.505537	-0.490115	-0.46242	-0.530023	-0.661557	-0.563539	-0.351198	-0.560079	-0.468775	-0.527801	-0.541924	-0.564426	-0.40232	-0.388727	-0.292776	-0.517628	-0.368391	-0.343705	-0.436141	-0.382115	-0.317377	-0.351992	-0.392219	-0.611921	-0.399558	-0.392963	-0.42103	-0.354016
ANPEP	0.296789	0.313375	0.440887	0.177152	0.609385	0.467064	0.402601	0.414445	0.188841	0.488923	0.642661	0.638316	0.564212	0.562858	0.714854	0.614593	0.613933	0.648946	0.608276	0.476263	0.483754	0.469326	0.590836	0.668332	0.470626	0.598709	0.391874	0.505047
ANTXR1	0.0279886	-0.150608	-0.0688108	0.00277783	-0.054943	-0.081113	0.161846	-0.0337271	0.087213	0.19294	0.0565536	0.0110537	-0.0101114	0.0515133	0.0984497	0.214592	0.130947	0.188471	0.0413911	0.227844	0.293698	0.160351	0.0374698	0.194259	0.27383	0.251926	0.157105	0.0603801
ANTXR2	-0.551396	-0.388727	-0.525446	-0.395959	-0.406404	-0.384926	-0.50773	-0.328455	-0.442695	-0.411478	-0.454202	-0.41851	-0.471474	-0.330859	-0.332907	-0.372968	-0.400581	-0.406702	-0.497355	-0.280441	-0.382706	-0.263072	-0.290984	-0.29466	-0.22355	-0.319177	-0.311403	-0.320855
ANTXRLP1	-1.33725	-1.32733	-1.33363	-1.25689	-1.63372	-1.60781	-1.19894	-1.60781	-1.29761	-1.41224	-1.18764	-1.49713	-1.38939	-1.41695	-1.6373	-1.35502	-1.17878	-1.41695	-1.55866	-1.35019	-1.21542	-1.40901	-1.30049	-1.33879	-1.39239	-1.43728	-1.5986	-1.46884
ANXA10	-0.30427	-0.215885	-0.16819	-0.0687181	0.0388715	-0.239798	-0.149607	-0.25632	-0.267785	-0.124591	0.193743	-0.0467348	-0.244545	-0.150078	-0.0995586	0.0676375	-0.0557715	-0.0355871	0.051128	0.22191	-0.017822	-0.0784679	-0.226635	-0.0570536	-0.315655	-0.141274	-0.166378	-0.275068
ANXA11	0.953906	1.24187	1.00815	1.3392	0.539271	0.702565	1.1074	1.228	0.85836	1.20175	1.51609	1.00398	1.02148	0.740316	1.1988	1.1411	1.25893	1.12629	1.03333	1.20839	1.24594	0.279177	0.943958	0.89475	0.933857	1.27396	1.03888	1.15559
ANXA13	0.288795	0.598709	0.387234	0.077917	0.27518	0.387234	0.254306	0.106116	0.390341	0.343459	0.201753	0.293234	0.355937	0.287714	0.0808399	0.0418677	0.198797	0.455449	0.160751	0.336122	0.172285	0.175271	0.269752	0.128312	0.278045	0.254561	0.278045	0.145445
ANXA2	-1.33879	-1.21098	-1.14377	-1.14377	-1.31857	-1.33879	-1.03388	-1.21854	-1.11019	-1.24749	-0.926957	-1.17796	-1.0091	-1.21098	-1.13455	-1.3159	-0.948027	-1.2504	-1.19263	-1.18689	-1.0875	-1.32733	-1.14297	-0.817011	-1.29221	-1.20469	-1.2646	-1.06923
ANXA2R	-0.0559871	-0.218875	-0.106128	-0.315031	-0.273526	-0.0202445	0.0236672	-0.148828	-0.0985637	0.0294858	-0.170694	-0.198037	0.04688	0.0232062	-0.0172505	-0.198927	0.0251576	-0.108578	-0.133696	-0.213923	-0.0995586	0.0407019	-0.244458	0.00976825	-0.160382	0.374441	0.0266932	-0.163754
ANXA3	-0.549072	-0.145509	-0.0896097	-0.486693	-0.182041	-0.106737	-0.00318453	-0.451188	-0.0805822	-0.0690795	-0.259309	-0.299305	-0.319605	-0.114651	-0.053443	-0.261046	-0.483775	-0.294954	-0.350927	-0.413039	-0.553366	-0.348049	-0.367328	0.0318012	-0.298949	-0.107908	-0.144812	-0.0112501
ANXA5	-1.81262	-1.37699	-1.33085	-0.773239	-1.79834	-1.70595	-0.492926	-1.69623	-1.73316	-0.861861	-0.735002	-1.67651	-1.59	-1.55268	-1.55682	-1.40104	-1.08849	-1.54291	-0.925786	-1.37699	-1.28574	-1.75734	-1.29899	-1.49	-1.69875	-1.07124	-1.22586	-0.627051
ANXA6	-0.303854	-0.421622	-0.0061089	0.232099	-0.0664231	0.158959	-0.0957942	0.0257535	-0.14747	0.316947	0.281175	0.147498	-0.0336695	0.292904	0.160687	-0.379146	0.374917	0.208798	-0.180374	0.21568	-0.177434	0.212763	0.168336	-0.0342774	-0.315277	0.116349	0.199736	0.118097
ANXA7	-0.0394498	0.068624	0.0518923	-0.0422459	-0.0600753	0.132366	0.046152	0.202192	0.0403554	0.040292	-0.0243632	0.0961896	0.0594989	0.149417	0.128482	0.288394	0.304394	0.246654	0.0154995	0.0804106	0.143182	0.342258	0.166861	0.255922	0.225823	0.185809	0.118672	0.353845
ANXA9	0.168568	-0.00911974	0.0875644	0.0623204	-0.0531551	-0.0106277	-0.00856128	-0.0812265	0.263378	0.411163	0.258914	0.174654	0.329867	0.228676	0.5574	0.253027	0.230095	0.200047	0.250706	0.254199	0.038742	0.281515	0.310065	-0.0270696	0.14893	0.261133	0.192448	0.363043
AOAH	-0.203011	-0.152969	0.0560988	-0.234506	-0.113088	0.0437278	-0.0224956	0.0623204	-0.0738124	-0.238238	-0.133336	-0.056604	0.0479745	-0.0512006	0.026009	-0.0607468	-0.173968	-0.00403547	-0.200473	-0.0356504	-0.0719216	-0.0820935	-0.18484	-0.0597724	-0.160774	-0.0810488	-0.162985	-0.233739
AOC1	0.544525	1.11444	0.652859	0.349902	0.762639	0.602276	0.401745	0.554676	0.780059	0.816297	0.578374	0.739151	0.688486	0.829171	0.474041	0.394933	0.49726	0.548007	0.571746	0.289195	0.811322	0.403803	0.476263	0.364085	0.224128	0.412068	0.388935	0.291308
AOC2	0.139675	-0.0130632	0.274224	0.0800756	-0.076394	0.0974072	0.141347	-0.13255	0.0191452	-0.0717495	0.23063	0.276888	0.0844633	0.21795	-0.0444633	-0.0668621	0.0326051	0.0521487	0.181628	0.217648	-0.00171052	-0.00334627	0.0452169	0.0280979	0.0126922	-0.208383	-0.228077	0.00401289
AOX3P-AOX2P	0.0800756	0.114641	0.0623639	0.294519	0.235853	0.0108172	0.132366	0.235611	-0.0267199	0.0663189	0.0827028	-0.0684217	0.148187	0.045709	-0.00226165	0.206227	0.0380856	-0.0232972	-0.0366553	0.09222	0.0906487	-0.113947	0.0536734	0.205383	0.000713372	0.16766	-0.0527771	-0.0949198
AP1AR	0.196431	0.217877	0.245617	0.16373	0.288795	0.274354	0.278799	0.311036	0.196869	0.157291	0.203741	0.103891	0.00401289	-0.00403547	0.0211533	-0.150281	0.00532757	0.0520906	-0.0232429	-0.00654359	0.139339	-0.132156	0.08596	-0.0901193	0.00827087	-0.00171052	-0.095969	-0.150666
AP1G1	-0.28568	-0.564426	-0.456604	-0.530392	-0.473334	-0.400921	-0.492211	-0.353916	-0.709494	-0.565697	-0.353687	-0.564789	-0.59921	-0.598744	-0.509478	-0.138435	-0.51199	-0.324593	-0.0827258	-0.38941	-0.32654	-0.463652	-0.471474	-0.475662	-0.34007	-0.152661	-0.366732	-0.747309
AP1M1	0.0786692	-0.155188	0.0896984	0.0459894	-0.00298488	0.1434	0.210935	-0.0651096	0.0552059	0.162403	-0.0069464	0.0275991	0.240989	0.0816736	0.0490945	0.0743327	0.238374	0.230547	0.201189	0.189081	0.161548	0.219338	0.0329859	0.00406591	0.0706197	0.302502	-0.156429	0.0813391
AP1M2	0.543369	0.717558	0.540052	0.520763	0.668332	0.830185	0.507993	0.542352	0.608887	0.720385	0.52602	0.711919	0.599895	0.643694	0.620541	0.442017	0.505878	0.459229	0.539608	0.361667	0.238592	0.259232	0.2891	0.421673	0.440374	0.302972	0.134456	0.175352
AP1S1	0.175947	0.406831	0.275497	0.320394	0.452002	0.295764	0.197191	0.402442	0.216735	0.299911	0.177989	0.335362	0.342583	0.336509	0.111626	0.322414	0.291392	0.304075	0.414757	0.325733	0.316592	0.291477	0.193645	0.058915	0.334087	0.0879029	0.0621422	0.177072
AP1S2	0.148877	0.429993	0.332351	0.338768	0.254738	0.286831	0.4676	0.196807	0.279099	0.461376	0.306201	0.416939	0.426079	0.322414	0.419159	0.257991	0.314431	0.374619	0.41732	0.331995	0.324851	0.313375	-0.00189027	0.523332	0.268763	0.373893	0.429993	0.347434
AP2B1	0.88554	1.02523	1.09854	0.300472	0.830185	0.757915	0.84342	0.522196	0.278712	0.404961	0.627235	0.81886	0.89475	0.439918	0.862853	0.359271	0.388685	0.822427	0.574221	0.414445	0.607269	0.459229	0.449559	0.171796	0.372687	0.483304	0.474041	0.422451
AP3B1	-0.665817	-0.914842	-0.7971	-0.88048	-0.768373	-0.705183	-0.633362	-0.7073	-0.961269	-0.615042	-0.415091	-0.643564	-0.746638	-0.559433	-0.741002	-0.644719	-0.561794	-0.660161	-0.626137	-0.769941	-0.777334	-0.608292	-0.541269	-0.45292	-0.925786	-0.884802	-0.708146	-0.550082
AP3B2	0.162609	0.111569	0.122393	0.173802	0.166299	0.125728	0.19694	0.199381	0.295269	-0.0188265	0.153908	0.183468	0.157291	-0.00646806	-0.00513814	0.341082	0.268268	0.241943	0.213746	0.117593	0.246931	0.273161	0.240876	0.293111	0.139675	0.300396	0.155671	0.0254986
AP3D1	-0.465938	-0.581425	-0.57795	-0.293806	-0.79202	-0.48096	-0.340357	-0.390464	-0.346704	-0.26724	-0.26526	-0.469431	-0.18484	-0.485292	-0.176059	-0.189214	-0.0450768	-0.117768	0.0429393	-0.241815	-0.135246	-0.174281	-0.000888192	-0.29967	-0.212416	-0.149127	-0.119889	-0.156724
AP3M1	-0.611473	-0.899518	-0.643978	-0.399258	-0.731874	-0.684	-0.522652	-0.983282	-0.680966	-0.870692	-0.482285	-0.782013	-0.687342	-0.625472	-0.7193	-0.674129	-0.622066	-0.606321	-0.594549	-0.491515	-0.514832	-0.562771	-0.660161	-0.581425	-0.606745	-0.622066	-0.536368	-0.503736
AP3M2	-0.750361	-0.850112	-0.509033	-0.799423	-0.663717	-0.587097	-0.849536	-0.599414	-0.708931	-0.750098	-0.509255	-0.512302	-0.604487	-0.683463	-0.678443	-0.39578	-0.324593	-0.284185	-0.540065	-0.375656	-0.313881	-0.344387	-0.477946	-0.339574	-0.376387	-0.068125	-0.465938	-0.487165
AP3S1	-0.651606	-0.492022	-0.967613	-0.284868	-0.779913	-0.789222	-0.492691	-0.591117	-0.786621	-0.651102	-0.635275	-0.567887	-0.475497	-0.782755	-0.200807	-0.482462	-0.536212	-0.34307	-0.313159	-0.364968	-0.698599	-0.703873	-0.254485	-0.21921	-0.567312	-0.332907	-0.619888	-0.22674
AP3S2	-0.550272	-0.398047	-0.438274	-0.689095	-0.515648	-0.815349	-0.756464	-1.06993	-0.942636	-0.654985	-0.691116	-0.566936	-0.937429	-1.26265	-0.686006	-0.532488	-0.722421	-0.711791	-0.819841	-0.868745	-0.840313	-0.994894	-0.990802	-0.842514	-1.21342	-1.00362	-1.14029	-1.14542
AP4E1	-0.0920049	-0.291907	-0.305514	-0.168482	-0.303499	-0.143736	-0.23399	-0.295479	-0.225887	-0.280629	-0.241601	-0.278715	-0.320352	-0.255923	-0.268612	-0.170086	-0.130007	-0.228798	-0.151138	-0.164388	-0.200807	-0.235694	-0.120541	-0.124156	-0.253013	-0.317575	-0.272049	-0.161941
AP4S1	-0.0622604	-0.215246	-0.0469012	0.0685128	0.202757	0.178196	0.0794607	-0.335175	-0.0641033	-0.00751922	-0.0396079	-0.161857	0.129173	0.104178	-0.529338	-0.311166	0.142135	0.345347	0.0299288	0.0240228	0.254662	-0.22201	0.255838	0.0949204	0.0685618	-0.223708	0.287088	-0.0284748
AP5B1	0.229569	0.205991	0.0302169	0.152263	-0.0674016	0.276072	0.292363	0.225437	0.345624	0.368923	0.465952	0.220604	0.243714	0.511397	0.489226	0.509437	0.526968	0.462597	0.624266	0.61085	0.565565	0.44291	0.754838	0.612508	0.176515	0.475312	0.508891	0.417731
AP5M1	-0.053443	0.0016807	-0.16068	-0.128094	-0.0639473	-0.194837	-0.117659	-0.128265	-0.105081	-0.246233	-0.143969	-0.117311	-0.181745	-0.131191	-0.0121848	0.10476	-0.130211	-0.0719861	-0.0991806	0.0223202	-0.219507	-0.115773	-0.170184	-0.146359	-0.221494	-0.184483	-0.0771083	-0.289738
AP5S1	-0.590723	-0.258993	-0.510375	-0.315655	-0.453399	-0.511067	-0.537943	-0.350927	-0.32532	-0.378863	-0.30438	-0.282063	-0.512789	-0.254069	-0.607231	-0.648356	-0.641539	-0.799789	-0.75786	-0.688364	-0.918826	-0.73435	-0.966181	-0.908449	-0.957753	-1.04453	-0.881845	-1.00601
AP5Z1	0.0729848	0.125506	0.253861	0.183395	0.2762	0.0993781	0.153908	0.111312	0.101394	0.188967	0.135923	0.00956181	0.124256	0.120067	-0.086844	-0.045744	-0.00735579	0.239581	-0.0222731	0.0716646	-0.112182	-0.0468441	-0.0125338	0.130234	-0.00144274	0.128563	-0.0419647	0.259415
APAF1	0.366191	0.101168	0.32252	0.0858978	0.299522	0.0375956	0.21209	-0.0857891	0.209687	-0.379576	-0.00977757	-0.323135	-0.10889	-0.0758101	-0.0382831	0.0621948	0.316592	0.416758	0.155277	-0.413955	0.184769	-0.306566	-0.090889	0.0754168	0.169629	-0.0529042	0.263895	0.145009
APBA1	-0.676634	-0.654266	-0.505684	-0.410835	-0.415091	-0.583955	-0.587944	-0.363742	-0.506083	-0.472759	-0.537943	-0.580697	-0.547937	-0.517048	-0.529621	-0.763152	-0.542156	-0.461154	-0.884521	-0.938478	-0.763439	-0.605584	-0.610699	-0.39945	-0.759488	-0.438274	-0.421484	-0.516392
APBA2	0.0156226	0.022736	-0.0282635	-0.0471271	0.10438	-0.0123793	-0.173677	0.0422468	-0.12718	-0.0496905	-0.0862871	-0.182693	-0.0699806	0.0127489	-0.00189027	-0.0043849	-0.0786629	-0.00710547	-0.0490646	0.0687304	0.0355574	0.0156226	0.0479745	-0.0456378	0.025385	-0.0452099	-0.133777	-0.0776746
APBA3	0.157996	-0.000888192	-0.100786	-0.112042	0.0742302	-0.0662341	-0.16274	-0.149031	-0.0365394	-0.127103	-0.220635	-0.16618	0.0269141	-0.0659065	0.152397	-0.129956	0.0457736	-0.179774	0.0635077	0.0194738	0.134384	0.0602231	0.100224	0.231137	0.115597	0.193244	0.299248	-0.162985
APBB1	0.146816	0.363043	0.38296	0.390794	0.303552	0.180032	0.464568	0.236948	0.392248	0.322204	0.530954	0.633803	0.618012	0.307116	0.846483	0.715703	0.643185	0.690272	0.619513	0.682286	0.619513	0.309964	0.495277	0.375941	0.504796	0.613933	0.56375	0.445967
APBB1IP	-0.981996	-1.07298	-0.982698	-0.671802	-0.770957	-0.707556	-1.03453	-1.10424	-0.775648	-1.23154	-0.993138	-0.658705	-0.852614	-0.585372	-0.37467	-0.861423	-0.758801	-0.625241	-1.06779	-0.791242	-1.39362	-1.03453	-0.852989	-0.535999	-0.653373	-0.746989	-0.726942	-0.886794
APC	-0.27556	-0.307895	-0.294765	-0.239972	-0.179253	-0.317781	-0.346823	-0.102122	-0.36468	-0.352558	-0.391912	-0.346486	-0.457215	-0.346905	-0.160525	-0.329656	-0.481637	-0.20271	-0.268834	-0.204172	-0.522186	-0.550478	-0.52844	-0.454508	-0.445748	-0.495925	-0.450106	-0.494625
APC2	0.128312	0.114101	0.233323	0.292424	0.408517	0.469848	0.128062	0.199736	-0.00735579	0.18274	-0.0942346	-0.029105	0.191728	0.322738	0.253508	0.315612	0.0406444	0.161692	0.315698	0.296011	0.141707	0.330942	0.331665	0.159711	0.214884	-0.0170517	-0.0342083	0.0413003
APCDD1	0.587819	0.760583	0.694546	0.606693	1.12354	0.698457	0.377458	0.595098	0.901403	0.579335	0.805265	0.594767	0.735235	0.450764	0.600873	0.414445	0.681683	0.440544	0.416407	0.630461	0.574707	0.581794	0.830185	0.918805	0.609385	0.643694	0.783536	1.02325
APCS	0.0649795	0.109497	0.206305	0.22813	0.405538	0.126718	-0.00183742	0.168161	0.0672176	0.379729	0.285318	0.366191	0.107052	0.093944	0.26344	0.0496906	0.148187	0.0086754	-0.0838405	0.0446761	0.12174	0.00970177	0.23877	0.250706	0.0342031	0.180166	0.382187	0.287435
APEH	0.0422982	0.136798	0.118202	0.253119	0.165511	-0.0152473	0.108307	0.202616	0.0166488	-0.0118553	0.0163631	-0.0509056	-0.0459836	0.0274142	-0.023638	0.0685128	-0.099946	-0.134723	-0.130211	0.185704	0.143067	-0.0985637	0.0892961	0.146673	-0.0216768	-0.0262102	0.000603638	0.00481483
APELA	-0.481637	-0.476876	-0.563329	-0.532292	-0.590462	-0.695065	-0.616246	-0.47085	-0.4686	-0.613104	-0.433657	-0.409818	-0.581209	-0.34815	-0.443319	-0.541742	-0.720483	-0.447148	-0.433657	-0.486542	-0.610942	-0.474484	-0.69458	-0.784633	-0.709175	-0.786272	-1.05548	-0.729777
APEX1	-1.99455	-1.50949	-1.50949	-1.69875	-1.62744	-1.52561	-0.954564	-1.56563	-1.41054	-1.33983	-1.77087	-1.80357	-1.2388	-1.56563	-1.21629	-1.55682	-1.42498	-1.64897	-1.83879	-1.74246	-1.16254	-1.48485	-1.82744	-1.27313	-1.45732	-1.12856	-1.30411	-1.65197
APEX2	0.0158852	0.191386	-0.0408428	-0.115487	0.0924089	-0.126992	-0.25118	-0.351529	-0.0509861	-0.469591	-0.420857	-0.359799	-0.526604	0.161205	-0.3485	-0.518517	-0.398862	-0.292119	-0.426454	-0.19209	-0.187712	0.0343153	-0.527332	-0.429647	-0.257308	-0.27996	-0.210182	-0.440914
APH1A	0.0421889	-0.14078	0.048465	-0.207193	0.0789891	0.234875	-0.252077	0.240435	-0.0078188	0.0418268	0.0480259	0.218251	0.151619	0.316458	0.369391	0.337559	0.366047	0.408289	0.331665	0.366625	0.265168	0.391683	0.403501	0.443804	0.303751	0.300472	0.00778512	0.548564
APH1B	0.163216	0.322738	0.262994	0.240989	0.358128	0.193686	0.290357	0.33862	0.0509541	0.0969108	0.0708808	0.102099	0.209687	-0.130916	0.0758439	0.0188598	0.334827	0.286424	0.157494	0.0632467	0.0100888	0.172658	0.124125	0.232594	0.154818	0.358128	0.212994	0.512086
API5	0.162939	0.189706	0.248791	0.207115	0.303203	0.324243	0.133547	0.0199441	0.128187	-0.126576	-0.0241895	0.273654	0.109132	-0.0381342	-0.129278	0.0223922	0.0482361	-0.0740215	0.0605733	0.245451	0.239655	-0.141028	-0.192378	-0.311494	0.0349114	-0.0588841	0.0788695	-0.0988894
APIP	0.0300977	-0.0635826	0.106379	0.0736589	-0.0316366	-0.142346	-0.120985	-0.0433593	-0.187942	-0.117311	-0.136931	-0.128265	-0.109196	-0.364366	-0.0577036	-0.113462	-0.344215	-0.203096	0.0140127	-0.124873	-0.170888	-0.34069	-0.179696	-0.172906	-0.00484124	-0.18732	-0.293101	-0.0192914
APITD1	-0.979779	-0.671327	-0.61043	-0.628246	-0.701207	-0.819841	-0.845485	-0.698599	-0.656193	-0.789222	-0.828133	-0.694318	-0.651606	-0.724615	-0.640567	-0.751676	-0.486542	-0.514832	-0.482901	-0.450702	-0.788918	-0.725865	-0.964073	-0.680512	-0.615724	-0.983889	-0.755892	-0.608056
APLF	0.0530256	0.0794607	0.0960425	-0.00873828	0.119573	0.131855	0.11513	0.169367	0.0983914	0.0948052	0.0677698	0.144604	0.112536	0.159574	0.145717	0.0732013	0.0286715	0.136399	0.131718	0.109034	0.208557	0.145717	0.063099	-0.0126666	0.0718675	0.103512	-0.0703673	0.0394237
APLN	0.422283	0.728735	0.569072	0.325097	0.260007	0.448171	0.380112	0.477961	0.3466	0.237896	0.345067	0.455244	0.598227	0.374777	0.30701	0.332437	0.226711	0.234371	0.434902	0.459481	0.364487	0.159115	0.46398	0.246744	0.374917	0.414445	0.548564	0.181138
APLP1	0.378686	0.406164	0.324646	0.300244	0.372395	0.339217	0.487764	0.41732	0.35014	0.373394	0.446175	0.47997	0.451211	0.534767	0.42427	0.55646	0.534767	0.633113	0.443454	0.538627	0.429392	0.454584	0.541581	0.494302	0.563354	0.517385	0.345217	0.427357
APLP2	0.386004	0.363443	0.204097	0.320658	0.17421	0.318052	0.399947	0.375941	0.444194	0.423309	0.368414	0.440887	0.443639	0.49726	0.495571	0.355249	0.683666	0.674411	0.410665	0.618389	0.519833	0.713385	0.534376	0.493756	0.437657	0.492366	0.630117	0.575995
APOA1	-0.212097	-0.509795	-0.431576	-0.668376	-0.356665	-0.216057	-0.51199	-0.349078	-0.391045	-0.193875	-0.722074	-0.441805	-0.689343	-0.297482	-0.41977	-0.321398	-0.348602	-0.339292	-0.461645	-0.478278	-0.146419	-0.332285	-0.0188265	-0.132865	0.139868	-0.359912	0.00587285	-0.234414
APOA2	-3.62445	-4.11922	-3.90043	-4.11922	-3.62445	-3.51295	-3.90043	-4.01535	-3.51295	-4.11922	-3.90043	-3.73111	-3.73111	-3.90043	-3.90043	-3.73111	-4.17791	-3.62445	-3.62445	-4.11922	-3.51295	-3.62445	-3.62445	-4.41114	-3.51295	-3.90043	-4.41114	-5.00394
APOB	-0.701207	-0.418256	-0.524848	-0.934463	-0.4906	-0.481249	-0.695403	-0.716463	-0.741002	-0.730212	-0.700891	-0.380752	-0.649137	-0.609121	-0.44247	-0.464774	-0.387432	-0.396434	-0.441805	-0.401064	-0.315371	-0.368862	-0.571747	-0.464127	-0.212918	-0.446594	-0.444331	-0.455129
APOBEC1	0.300695	0.0361414	0.00406591	0.132585	0.126125	0.0695893	0.042704	0.0106754	-0.104634	-0.0131374	0.0954772	0.0394895	3.76626e-05	0.011315	0.0413366	-0.0747723	-0.0665366	0.0621948	-0.149222	0.00570595	-0.176497	-0.0105638	-0.0748798	-0.200267	-0.0730804	0.0572316	-0.0078674	0.203903
APOBEC3C	-0.369101	-0.432672	-0.383308	-0.498937	-0.625472	-0.547291	-0.542777	-0.471993	-0.185199	-0.333803	-0.479682	-0.302555	-0.336191	-0.293591	-0.439302	-0.354615	-0.148828	-0.434087	-0.438454	-0.587944	-0.572702	-0.381441	-0.542986	-0.497211	-0.534426	-0.355767	-0.715315	-0.724918
APOBEC3D	-0.289017	-0.0686668	-0.439302	-0.0801077	-0.268834	-0.484302	-0.458562	-0.266934	-0.121458	-0.4028	-0.110239	-0.381943	-0.536212	-0.552535	-0.517628	0.0429393	-0.64328	-0.336305	-0.52286	-0.578951	-0.674445	-0.219507	-0.295864	-0.415798	-0.568719	-0.158989	-0.200807	-0.211108
APOBEC3F	0.434902	0.308411	0.41304	0.509163	0.497855	0.345788	0.390341	0.428156	0.391087	0.244349	0.326882	0.331544	0.386154	0.261314	0.413189	0.259415	0.278892	0.122525	0.0062776	0.268763	0.310857	0.253697	0.283639	0.542941	0.100457	0.15522	0.247894	0.350576
APOBEC3H	-0.717256	-0.655908	-0.634857	-0.672208	-0.874665	-0.84798	-0.855486	-0.996618	-0.8056	-0.663174	-0.937429	-0.780297	-0.882257	-0.776	-0.941617	-1.12297	-1.02452	-0.621679	-1.15126	-1.64381	-1.01062	-0.922579	-1.09885	-1.16254	-1.15902	-1.12114	-1.21196	-0.901604
APOBEC4	0.083235	-0.0610059	0.0738849	0.00633002	0.129784	0.0946591	-0.0887628	0.034035	-0.100669	0.124125	-0.0697379	0.0199441	0.0634516	0.190917	-0.147847	0.141707	0.0351628	-0.0935151	-0.267356	-0.239208	0.223035	0.11237	0.0392551	0.0555178	0.141648	-0.00284453	-0.0963935	-0.0204914
APOC1	-1.09654	-1.26265	-1.21732	-1.66361	-1.29899	-1.32917	-1.39362	-1.45358	-1.3452	-1.43414	-1.35906	-1.39075	-1.44121	-1.37842	-1.12297	-1.17016	-1.64042	-1.33879	-1.34762	-1.43728	-1.11076	-1.11521	-1.0907	-1.11891	-1.30049	-1.21854	-2.00321	-1.04217
APOC2	-0.131322	-0.478137	-0.453399	-0.367708	-0.472581	-0.695968	-0.348375	-0.758599	-0.794071	-0.587531	-0.617508	-0.791242	-0.576891	-1.07124	-0.674445	-0.672001	-0.588167	-0.701965	-0.516392	-0.821024	-0.74262	-0.961269	-0.628246	-0.686223	-0.589113	-0.821024	-0.818608	-0.557835
APOD	3.07736	3.28921	2.90723	1.59196	4.06155	3.40106	3.55656	2.41343	2.90723	1.81799	1.4134	3.40106	2.80393	2.541	2.75233	2.22503	2.29246	2.3706	2.03829	3.4722	3.22555	2.32917	2.3706	3.40106	3.33386	2.6512	1.55901	1.228
APOE	0.090124	0.0086754	-0.123643	-0.0296776	0.0274142	-0.12818	-0.122882	-0.147689	0.000907551	-0.188362	-0.0920049	0.366393	0.134456	-0.0146085	0.193958	-0.157348	-0.0396874	-0.000243052	-0.0410924	0.0391958	-0.0905627	-0.267785	-0.0629982	-0.181227	0.130817	0.017523	0.0404723	0.0619022
APOH	-3.008	-2.57157	-3.51295	-3.11681	-2.65153	-3.17558	-3.73111	-3.62445	-2.95015	-3.51295	-3.11681	-2.73023	-2.55036	-2.73023	-3.62445	-3.05564	-3.17558	-2.84873	-2.59645	-3.11681	-3.32245	-2.95015	-3.4111	-4.11922	-3.17558	-3.32245	-3.62445	-4.54092
APOL3	0.189295	0.300695	0.693067	0.447427	0.268442	0.408075	0.50205	0.491239	0.456119	0.780059	0.336122	0.676502	0.490133	0.530954	0.731295	0.440137	0.403327	0.362759	0.30124	0.607269	0.613933	0.550927	0.396497	0.414901	0.483304	0.341408	0.385224	0.478972
APOL4	-1.61976	-1.78479	-1.52045	-1.92471	-1.0184	-1.24935	-1.98133	-2.02436	-1.58652	-1.97607	-1.96908	-1.98978	-2.0535	-1.89325	-2.62795	-1.96418	-2.43928	-2.00321	-2.43928	-1.68695	-2.02436	-1.96908	-2.46375	-1.98133	-1.83879	-1.68435	-2.20219	-1.3452
APOL5	0.212191	0.0942413	0.149417	0.164174	0.0386751	0.0678646	0.219338	0.0051015	0.232594	0.197191	0.118904	0.148815	0.0703405	0.0995981	-0.248899	0.0389313	-0.0353359	0.388935	-0.18484	-0.23285	0.0805172	0.151688	0.0278597	0.0843485	0.0334578	0.114523	0.0534714	0.109132
APOL6	-0.0104963	-0.129881	-0.13014	-0.342694	-0.189978	-0.0203717	-0.121256	-0.195327	-0.143867	-0.172502	-0.142953	-0.0346306	-0.149676	-0.113607	-0.151558	-0.189291	-0.273962	-0.13301	-0.416979	-0.0177594	-0.210018	-0.387584	-0.303747	0.0091683	-0.240171	0.104597	-0.202231	-0.302358
APOLD1	0.0121728	0.871633	0.150618	0.237477	0.450764	-0.167894	0.976147	-0.132073	0.630117	-0.127593	-0.178016	-0.27918	0.129233	0.760583	0.550927	0.156898	-0.146419	0.161338	0.664549	-0.20761	0.27204	0.39861	0.628956	0.380953	0.288999	-0.010284	0.078269	0.912292
APOM	-0.284593	-0.624982	-0.34448	-0.562771	-0.509255	-0.221898	-0.407682	-0.41977	-0.2699	-0.380131	-0.57744	-0.54821	-0.23718	-0.582649	-0.334153	-0.637757	-0.402899	-0.42444	-0.373934	-0.377409	-0.475497	-0.458839	-0.449234	-0.640095	-0.634857	-0.4028	-0.341696	-0.254371
APOO	0.409094	0.427534	0.410492	0.412492	0.534376	0.434474	0.208504	0.488338	0.371807	0.373542	0.385224	0.372256	0.435648	0.241633	0.368414	0.437991	0.250631	0.36374	0.387972	0.372687	0.403641	0.331995	0.583157	0.681683	0.148582	0.655462	0.176881	0.304851
APOOL	-0.354946	-0.341696	-0.346368	-0.324818	-0.345124	-0.203548	-0.296635	-0.1802	-0.282149	-0.191388	-0.30045	-0.238449	-0.361116	-0.218957	-0.186238	-0.34307	-0.356359	-0.425415	-0.389027	-0.390905	-0.361448	-0.230031	-0.292444	-0.209221	-0.379428	-0.458562	-0.18494	-0.261768
APOPT1	0.00570595	0.203971	0.197263	0.235375	0.758811	0.318587	0.230456	0.249917	0.448695	0.199911	0.331246	0.545064	0.207181	0.386004	-0.00291136	0.317064	0.354306	0.383086	0.210842	0.134167	0.470085	0.608887	0.436326	0.435894	0.424918	0.173597	0.667945	0.394933
APP	-0.0521151	0.0299801	0.00912169	0.100399	0.0100888	0.0916106	-0.015178	0.190264	0.198936	-0.00906758	0.114463	-0.0220286	0.124189	0.249548	0.241472	0.234296	0.353299	0.310935	0.318052	0.352624	0.272713	0.284492	0.192109	0.252001	0.326265	0.304625	0.263175	0.0908973
APPBP2	0.0267265	0.0633454	0.01605	0.139965	0.0978996	0.157031	0.0392551	-0.0539585	0.0020597	0.0126369	-0.0187598	0.139629	0.0986633	-0.0951731	-0.0376246	-0.126576	-0.0790691	0.0423684	-0.171507	-0.0899318	-0.102613	-0.138804	-0.213327	-0.265522	-0.081534	-0.119821	-0.376959	-0.284964
APPL1	0.0644089	0.248478	0.0701628	0.212448	0.200299	0.134789	-0.0708429	-0.00698865	0.0975317	0.087213	0.0243143	-0.0193713	0.107112	-0.143586	-0.118727	-0.106312	0.12401	-0.000888192	-0.138121	-0.173141	0.104265	0.179315	0.000216621	-0.0467875	0.0740192	0.00794075	0.207115	0.0438865
APPL2	-0.593116	-0.411628	-0.391212	-0.771346	-0.38476	-0.764924	-0.390464	-0.684588	-0.609121	-0.57138	-0.717823	-0.556603	-0.7456	-0.600723	-0.348268	-0.652213	-0.716956	-0.505122	-0.488166	-0.617245	-0.374166	-0.590462	-0.4999	-0.34257	-0.491132	-0.591544	-0.479837	-0.533279
APRT	-0.340991	-0.574946	-0.272352	-0.255557	-0.246483	-0.24343	-0.168694	-0.363981	-0.238238	-0.217563	-0.407779	-0.259217	-0.454202	-0.362625	-0.244747	-0.386017	-0.47934	-0.44893	-0.302137	-0.305514	-0.222465	-0.256746	-0.218087	-0.163853	-0.354363	-0.293101	-0.227387	-0.354711
APTX	-0.284274	-0.199084	-0.485137	-0.259762	-0.441805	-0.329878	-0.193454	-0.287333	-0.2484	-0.28556	-0.186793	-0.227696	-0.297263	-0.369939	-0.27145	-0.292119	-0.00906758	-0.414986	-0.115061	0.017356	-0.407234	-0.138915	-0.352221	-0.481808	-0.215885	0.0105451	-0.094491	-0.104288
AQP1	0.440544	0.414901	0.952158	1.02764	0.956225	0.853499	0.945715	1.18084	1.03333	0.34635	0.494047	0.325222	0.443208	0.679032	0.899448	0.710981	0.726559	0.185286	0.599281	0.832865	0.722356	0.868747	0.374005	0.952158	0.744082	0.595098	0.172285	0.704228
AQP11	-0.0368742	-0.09777	-0.18003	-0.158535	-0.0848347	-0.0931008	-0.143103	-0.145349	-0.229936	0.0521487	0.041157	-0.139774	-0.144812	-0.0803446	0.11497	-0.0792237	0.00277783	-0.0577919	0.0666063	0.00401289	-0.0841885	-0.0708967	0.0269676	0.0181243	-0.0934284	-0.160229	0.152472	-0.0417856
AQP2	-0.0523143	0.099889	0.0137335	-0.0129442	0.177742	0.143735	0.207115	0.116869	0.0518923	0.165811	0.211348	0.082376	0.0913969	-0.14419	-0.389154	0.238275	-0.146268	0.0717218	-0.0726733	0.0062365	-0.113534	0.227982	0.0770104	0.204576	-0.00361961	-0.026047	0.0852771	0.411841
AQP3	-0.556603	-0.159135	-0.346486	-0.3813	-0.531896	-0.392963	-0.36252	-0.230845	-0.343343	-0.194075	-0.365202	-0.256933	-0.270859	-0.0645704	-0.350398	-0.447148	-0.20485	-0.324381	-0.323636	-0.335424	-0.294765	-0.161537	-0.482462	-0.280523	-0.491692	-0.678443	-0.630683	-0.466658
AQP4	-0.0262657	0.0466296	-0.0441158	0.142514	-0.0295577	0.245767	0.118371	0.0430548	0.151558	0.109232	0.00656146	0.0051015	0.236948	0.505878	0.0731346	0.156598	0.109563	0.339118	0.40154	0.132628	0.405145	0.384397	0.219724	0.201753	0.0989984	0.451567	0.237225	0.0558308
AQP5	0.0227952	-0.0748798	0.123128	0.204913	0.25739	0.142135	0.0528865	0.189854	0.569072	0.0406444	0.142441	0.0134975	0.194087	0.103512	0.0559282	0.0789891	0.00856902	-0.0953971	0.2894	0.0369798	0.0293002	0.290653	0.125128	0.300807	0.0439915	0.12039	-0.0776746	0.255314
AQP7	0.792402	0.493756	0.483304	0.58359	1.00205	0.861418	0.589713	0.967042	1.02148	0.591825	0.638316	0.972612	0.745496	0.85836	0.92209	0.652091	0.957797	0.88303	0.884227	0.861418	0.816297	0.78792	0.94251	0.792402	0.943958	0.729749	0.741524	0.696132
AQP9	-0.391212	-0.209079	-0.237449	-0.161456	-0.0510421	-0.173502	-0.12105	-0.22674	-0.141366	-0.0417856	-0.379576	-0.340193	-0.0508291	-0.348375	-0.289203	-0.321888	-0.414261	-0.00139239	-0.00616628	-0.0129442	-0.286272	-0.558445	-0.230913	0.328407	-0.429647	-0.441205	-0.348974	-0.18561
AQR	-0.842514	-0.808238	-0.607048	-0.868745	-0.640281	-0.600014	-0.661001	-0.778355	-0.677128	-0.710262	-0.74069	-0.831419	-0.771801	-0.808875	-0.653118	-0.641539	-0.885231	-0.900243	-0.659081	-0.847151	-0.627538	-0.752591	-0.843324	-0.74262	-0.825036	-0.769134	-0.630069	-0.812967
AR	0.666636	0.504518	0.461142	0.368029	0.304075	0.152783	0.0818408	0.433143	0.244707	0.209896	0.636964	0.2588	0.328407	0.377458	0.613933	0.748891	0.857225	0.923422	0.889323	0.853499	1.15154	0.508891	0.757915	0.684538	0.659146	0.430336	0.540379	0.639575
ARAF	0.744082	0.21621	0.155884	0.217168	0.294519	0.465321	0.839315	0.381288	0.347557	0.623227	0.656544	0.693067	0.519833	0.480157	0.537216	0.645529	0.540757	0.773729	0.315024	0.595098	0.567177	0.548902	0.416248	0.352735	0.533461	0.311164	0.465043	0.362628
ARAP1	-0.251981	0.136341	-0.395529	0.0602231	-0.0147899	-0.0082373	0.0240228	-0.030889	0.0916622	0.0603801	0.223428	-0.0961157	-0.076522	0.0313635	0.165302	0.15771	-0.047668	0.186373	0.231394	0.172335	0.113895	0.0246064	0.390341	0.0917252	0.0006458	0.0784085	0.0665237	0.334448
ARAP2	0.240609	0.197815	0.188192	0.19341	-0.0551038	0.227083	0.137093	0.0141101	0.499915	0.169749	0.149573	0.0774236	0.427743	0.224515	0.115215	-0.056366	0.139746	0.341532	0.237674	0.170537	0.184284	0.218743	0.0786692	-0.0257103	0.132178	0.0053995	0.299778	0.116007
ARAP3	-0.0363537	-0.0844717	-0.0485186	-0.015178	-0.249271	0.0458705	0.0875069	0.507993	-0.252701	-0.301478	-0.396055	0.307492	-0.360053	-0.0973965	-0.0876017	0.0729197	0.0989984	0.0213428	-0.253013	-0.0625688	0.210532	0.067329	0.304851	0.150618	0.211999	0.503857	0.132982	0.217417
ARCN1	-1.37362	-1.15902	-1.00538	-0.97643	-1.72451	-1.52045	-0.977778	-1.33085	-1.39822	-0.934463	-1.13691	-1.33621	-0.954564	-1.32185	-1.07712	-0.911604	-0.587713	-1.03453	-0.772439	-0.908449	-0.797445	-0.942636	-0.740241	-0.662894	-1.10748	-0.904857	-0.739907	-0.835465
AREG	-1.5795	-1.62317	-1.75324	-1.90639	-1.93709	-1.73743	-0.84075	-1.37362	-1.24935	-1.64042	-2.19467	-1.90639	-1.6801	-2.19467	-0.753426	-1.96908	-2.46375	-1.97607	-1.98133	-2.73023	-1.87675	-1.65757	-1.73316	-2.19467	-1.76554	-1.68695	-1.16448	-1.66063
ARF1	0.195513	0.51326	0.436326	0.416568	0.741524	0.42348	0.220532	0.137706	0.061542	0.512086	0.452641	0.492366	0.334707	0.345788	0.0553172	0.257724	0.225636	0.404565	0.294433	0.168487	0.345624	0.282722	0.202266	0.489485	-0.0548846	0.0233966	0.363877	0.161009
ARF3	-1.07358	-0.905774	-0.948027	-0.7356	-1.03312	-1.02561	-0.869483	-1.3069	-1.20469	-1.11616	-1.06054	-1.22698	-1.28203	-1.45358	-1.47522	-1.22921	-1.49401	-1.23576	-1.31325	-1.24839	-1.33879	-1.53791	-1.42872	-1.36588	-1.38764	-1.41695	-1.30158	0.0227952
ARF4	-0.477814	-0.406702	-0.40898	-0.185324	-0.591358	-0.436341	-0.270859	-0.550272	-0.415619	-0.289642	-0.455129	-0.587531	-0.30394	-0.57138	-0.396567	-0.273759	-0.14665	-0.286157	-0.227305	-0.319777	-0.369101	-0.40788	-0.320747	-0.388162	-0.432822	-0.275181	-0.330482	-0.259978
ARFGAP1	-0.0908101	-0.301143	-0.346823	-0.230128	-0.33859	0.00608714	-0.248978	-0.131919	-0.0287991	0.00839893	-0.480184	-0.0365989	0.199911	-0.194547	0.49478	-0.101256	0.189556	0.123489	0.0265126	-0.0179991	-0.17954	0.161338	-0.109286	-0.596738	0.113237	-0.483775	0.287205	-0.531364
ARFGAP2	0.121225	0.335534	0.261632	0.226121	0.34097	0.266433	0.217168	0.223933	0.177424	0.145513	0.261058	0.196591	0.149119	0.134226	0.255838	0.124511	0.192373	0.279354	0.185062	0.0106254	0.130159	0.105229	0.0307822	-0.178016	-0.0533229	0.135073	0.0183673	0.0161556
ARFGAP3	-0.430005	-0.468933	-0.379017	-0.462729	-0.856608	-0.712459	-0.189291	-0.4978	-0.360419	-0.223258	-0.271838	-0.734063	-0.455515	-0.574243	-0.280864	-0.625241	-0.250653	-0.354215	-0.242214	-0.454652	-0.396434	-0.400042	-0.433123	-0.663174	-0.39987	-0.431106	-0.299443	-0.140446
ARFGEF1	0.324953	-0.0460729	0.0296331	-0.28013	-0.201544	-0.111582	0.129173	0.0272325	0.224068	0.406	0.0773689	0.213281	0.125951	-0.11523	0.315811	0.535126	0.482545	0.308411	0.115846	0.198872	0.0669881	0.406337	0.0845313	-0.0418416	0.357241	0.280724	0.167	0.141707
ARFGEF2	-0.291628	-0.116589	-0.0615859	-0.0821644	-0.103148	-0.258709	-0.184066	-0.0266742	-0.100493	-0.232579	-0.161383	-0.334863	-0.107357	-0.191995	-0.0300808	-0.352458	-0.184649	-0.207353	-0.277059	-0.193366	-0.228147	-0.41265	-0.424916	-0.559621	-0.254168	-0.296635	-0.320126	-0.105653
ARFGEF3	-0.521583	-0.574243	-0.289642	-0.643045	-0.509478	-0.538363	-0.50588	-0.534637	-0.313159	-0.321671	-0.516202	-0.290365	-0.21129	-0.393177	-0.321671	-0.562771	-0.258495	-0.536729	-0.489807	-0.729515	-0.580339	-0.401867	-0.541089	-0.491692	-0.325711	-0.276633	-0.450702	-0.475662
ARFIP1	-0.614863	-0.272238	-0.129421	-0.159286	-0.632727	-0.333068	0.18663	0.0559855	-0.314238	0.251926	-0.407975	-0.283555	-0.136045	-0.275381	0.00342703	-0.543601	-0.247129	-0.7356	-0.35615	-0.495156	-0.338054	-0.621679	-0.309213	-0.27636	-0.510193	-0.613857	-0.405874	-0.45605
ARFIP2	0.1369	0.316592	0.238992	0.242853	0.0849186	0.411678	0.324953	0.401745	0.452929	0.586602	0.157996	0.235091	0.411678	0.337919	0.271004	0.135464	0.0177212	0.175555	0.364487	0.182886	0.522196	0.505878	0.241182	0.386678	0.468434	0.329364	0.36374	0.0723979
ARFRP1	-0.246645	-0.0683517	-0.117594	-0.202913	-0.262029	-0.459288	-0.282063	-0.139209	-0.259638	-0.34108	-0.300902	-0.458344	-0.233739	-0.266575	-0.513542	-0.116154	-0.537943	-0.219314	-0.47605	-0.40258	-0.140128	-0.23164	-0.186138	-0.338054	-0.278003	-0.287131	-0.140446	-0.211793
ARG1	0.116758	0.213923	0.129734	0.181138	0.323655	0.00856902	-0.0425227	0.138883	-0.0311565	0.0743973	0.238182	0.2095	0.210532	-0.0352192	0.404565	0.165362	0.158186	0.0737373	0.24035	0.233384	-0.0471271	0.276072	0.0990478	-0.15324	0.0532815	-0.042724	0.252787	0.419666
ARG2	-1.05906	-1.16448	-1.02696	-0.579453	-1.24839	-1.3489	-1.0005	-1.56109	-1.21098	-1.13691	-1.27729	-1.29504	-1.12392	-1.22586	-1.42872	-1.1502	-1.61119	-1.22921	-1.28303	-1.40473	-0.908143	-1.29637	-0.775648	-1.64381	-1.19263	-1.05472	-1.15418	-1.19488
ARGFX	-0.0327172	-0.344884	-0.147071	-0.291086	-0.524108	-0.387258	-0.396308	-0.597498	-0.0338426	-0.183223	-0.171087	-0.400175	-0.154107	-0.0317335	-0.0751395	-0.218679	0.008031	-0.262137	0.000306563	-0.24319	-0.179774	-0.243909	-0.2198	-0.208683	-0.0449436	-0.0112501	-0.187395	-0.17206
ARGLU1	-0.473723	-0.412798	-0.324688	-0.501245	-0.103006	-0.241921	-0.287131	-0.214728	-0.237684	-0.327932	-0.367162	-0.229549	-0.295031	-0.41291	-0.464774	-0.375795	-0.42883	-0.326336	-0.421796	-0.502513	-0.535781	-0.485137	-0.462729	-0.615724	-0.524657	-0.41265	-0.445882	-0.567639
ARHGAP10	0.131069	0.140775	0.0539781	0.198464	0.13459	0.0417598	0.0446058	0.210532	0.0114078	0.270896	0.113505	0.026356	0.120547	0.139209	0.19294	0.162878	0.183825	0.143535	0.0907726	0.0769421	-0.00347121	0.0794607	0.269507	0.0466296	0.092289	0.0978409	0.10781	0.0212223
ARHGAP12	-0.386821	-0.318015	-0.26465	-0.347628	-0.382411	-0.293591	-0.385211	-0.214089	-0.28096	-0.337426	-0.233855	-0.19842	-0.25794	-0.138915	-0.164321	-0.174501	-0.103251	-0.211793	-0.129749	-0.176282	-0.250734	-0.134874	-0.180789	-0.130697	-0.321163	-0.247129	-0.167059	-0.19631
ARHGAP15	-0.274507	-0.281511	-0.104995	0.0167795	-0.129956	-0.100917	-0.0174281	-0.176	-0.219671	-0.288481	-0.146021	-0.222465	-0.0736307	-0.25118	-0.0984086	-0.391212	-0.244936	-0.140598	-0.345654	0.000216621	-0.340357	-0.26157	-0.197952	-0.06039	-0.380358	-0.354363	-0.145655	-0.117252
ARHGAP17	0.120445	0.0492577	-0.0980344	-0.125256	-0.00489504	-0.0804084	-0.106681	-0.128429	0.253119	0.0641161	0.00566364	0.147749	0.0857728	0.168568	0.00682637	0.169822	0.0945192	0.237124	0.215403	-0.0650296	-0.0641848	-0.0249204	0.216296	-0.0262102	0.300472	-0.00829034	0.215403	0.207115
ARHGAP19	0.0773689	0.0321998	-0.0139386	-0.144727	-0.119355	-0.0818177	-0.0274359	-0.211446	0.166234	0.133902	-0.0147899	-0.0027269	-0.0172505	0.0404723	0.0494309	0.0903322	0.161408	0.107379	-0.0394498	0.0240708	0.0542054	0.0738849	-0.207099	-0.289438	0.0162535	-0.052615	-0.0587491	-0.110334
ARHGAP20	-0.0448811	-0.00382006	-0.0966312	0.0713495	-0.0951731	-0.0787889	0.108363	0.100565	-0.124518	-0.0843711	-0.0516567	-0.0688108	-0.150666	-0.132711	-0.151001	0.0522751	-0.0295112	-0.10717	0.0328548	0.00196268	-0.0585658	-0.103484	0.0053995	-0.0789044	-0.000345887	-0.0307725	-0.0352882	-0.0134809
ARHGAP21	-0.197889	-0.178222	-0.219416	-0.192866	-0.448402	-0.236891	-0.293711	-0.253713	-0.23285	-0.401064	-0.365437	-0.360289	-0.330859	-0.342957	-0.326418	-0.408303	-0.41265	-0.419383	-0.510532	-0.424256	-0.400175	-0.108076	-0.375246	-0.284759	-0.225887	-0.369776	-0.34659	-0.33996
ARHGAP22	-0.413188	-0.572292	-0.486693	-0.555595	-0.352106	-0.42312	-0.567079	-0.534426	-0.574467	-0.705816	-0.560975	-0.703232	-0.627538	-0.742019	-0.72134	-0.65052	-0.851307	-0.831793	-0.793641	-0.716043	-0.694318	-0.754612	-0.692366	-0.752989	-0.743326	-0.509795	-0.544008	-0.539202
ARHGAP24	-0.0594363	0.20893	0.0232815	-0.0295112	-0.132242	-0.0657911	-0.0761112	-0.017822	-0.0897304	-0.104346	0.0467271	-0.000888192	-0.262233	-0.0215163	-0.261768	0.043263	-0.134083	-0.106038	0.0641161	-0.10392	-0.173502	-0.00291136	0.0926252	-0.0396874	0.0547993	-0.300238	-0.00461324	-0.0991325
ARHGAP25	-0.446881	-0.219888	-0.245733	-0.449234	-0.558445	-0.3867	-0.296124	-0.0543282	-0.327528	-0.0658472	-0.415619	-0.171087	-0.0808236	-0.339292	0.0979972	-0.312396	-0.201843	-0.123643	-0.210537	-0.356275	-0.190614	-0.321279	-0.469756	-0.304057	-0.387432	-0.249271	-0.259762	-0.254069
ARHGAP26	-0.00347121	-0.0933579	-0.0127616	-0.134141	-0.056366	0.0110972	-0.0862871	-0.015178	-0.0282635	-0.158206	-0.032832	0.0322562	-0.0614924	0.0589747	0.125778	0.0554061	-0.0150288	-0.0478938	-0.111876	0.0808935	-0.0433593	0.157105	-0.012234	-0.0224956	0.0714026	-0.161456	-0.0763285	-0.0382076
ARHGAP26-AS1	0.171522	0.538627	0.242415	0.246127	0.202042	0.327255	0.283292	0.307492	0.368414	0.318476	0.519512	0.396971	0.515405	0.172728	0.351342	0.249453	0.179169	0.313716	0.179432	0.403641	0.102663	0.281263	0.369992	0.536981	0.0481646	0.276707	0.342468	0.105701
ARHGAP27	0.0439338	-0.156603	0.0179158	0.0107437	-0.00352307	-0.0197443	-0.00580418	0.0129445	0.033859	-0.000508413	-0.0321134	0.0356205	-0.140128	-0.103484	0.0581203	0.109639	0.27323	0.0684522	-0.0224956	0.1194	0.0418268	0.109232	-0.0837269	-0.0338942	0.0948683	0.0439915	-0.081534	-0.139968
ARHGAP28	0.0583858	0.288891	0.304535	0.177207	0.4456	0.31925	0.339705	0.56591	0.0340807	0.232519	0.427743	0.522497	0.260757	-0.0544074	0.219724	0.0265613	0.202418	0.378101	0.266356	0.257238	0.154046	0.291114	0.358509	0.375494	-0.0347897	0.187624	0.225896	0.16249
ARHGAP29	0.372906	0.365081	0.222147	0.194713	0.135763	0.235305	0.101819	0.222659	0.51801	0.2771	-0.0582795	0.368555	0.291192	0.367009	0.27074	0.222955	0.275708	0.25209	0.236556	0.188393	0.166935	0.296223	0.102947	0.100794	0.387428	0.302616	0.246931	0.319688
ARHGAP31	-0.727587	-0.562261	-0.786272	-0.847565	-0.724167	-0.657147	-0.618022	-0.626137	-0.743701	-0.540897	-0.614863	-0.419274	-0.509795	-0.115919	-0.428067	-0.45135	-0.577708	-0.456877	-0.69458	-0.435388	-0.359697	-0.274748	-0.238125	-0.337284	-0.272645	-0.453999	-0.272979	-0.390132
ARHGAP32	-0.286561	-0.322952	-0.416534	-0.471824	-0.344586	-0.141977	-0.499326	-0.417779	-0.3653	-0.467747	-0.321888	-0.22834	-0.341186	-0.174112	-0.451656	-0.334153	-0.375533	-0.325199	-0.309527	-0.227305	-0.4887	-0.388611	-0.456728	-0.731581	-0.407682	-0.421356	-0.645019	-0.500658
ARHGAP35	-0.672001	-0.832946	-0.569653	-0.753675	-0.723063	-0.731874	-0.466369	-0.674445	-0.946864	-0.820644	-0.888818	-0.968665	-1.00236	-1.05833	-0.902297	-0.706687	-0.720781	-0.78316	-0.818608	-0.708146	-0.477814	-0.752989	-0.638518	-0.536368	-0.689095	-0.635545	-0.648867	-0.647518
ARHGAP36	0.0174211	-0.00183742	0.00656146	0.0648582	0.115944	0.0954049	0.190068	0.17755	-0.0806427	0.0566089	-0.0163974	0.031281	0.0345668	-0.191914	-0.0234397	0.135573	-0.0828519	-0.118427	0.149812	0.176929	0.0791006	-0.0702202	0.0539187	0.0366455	-0.0586393	0.0259381	-0.0903175	0.135649
ARHGAP39	0.103085	0.0672601	0.031103	0.177483	-0.0263706	0.137706	0.0593552	0.118371	0.00764708	0.00335144	-0.00226165	0.00604846	-0.0649535	0.00990315	0.0423684	0.058711	-0.0304099	0.102728	-0.0200031	0.129036	0.0875644	-0.00199636	0.0458705	0.0936489	-0.121874	0.127995	0.0326744	0.088906
ARHGAP4	0.3319	0.405538	0.255705	0.274577	0.322089	0.307659	0.152472	0.312841	0.380953	0.308631	0.294211	0.294211	0.325222	0.423885	0.15198	0.275628	0.159399	0.327986	0.165039	0.0777178	0.0452685	0.100794	0.194635	-0.011425	0.238699	0.254199	0.171741	0.175705
ARHGAP5	0.0092325	0.0423684	0.321853	0.263076	0.0666063	0.330942	0.139868	0.0564617	0.0277993	-0.0173126	-0.191128	0.155071	0.223275	0.11216	0.405538	0.130947	0.130346	0.444932	0.353299	0.142769	0.247103	-0.0517603	-0.0320115	-0.471647	0.134653	0.453142	0.441274	-0.0212754
ARHGAP5-AS1	-0.399002	-0.191558	-0.340193	-0.295142	-0.624982	-0.383791	-0.304507	-0.538568	-0.135647	-0.0941592	-0.20096	-0.424679	-0.0417856	-0.764223	-0.750361	-0.812967	-0.301332	-0.250969	-0.279256	-0.677128	-0.264972	-0.0519068	-0.174363	-0.404397	-0.357583	-0.0134238	0.255501	-0.119408
ARHGAP6	-0.169463	-0.308444	-0.249479	-0.272352	-0.437131	-0.407005	-0.0857107	-0.463096	-0.255245	-0.247893	-0.330859	-0.23738	-0.749646	-0.36747	-0.219888	-0.305832	-0.353552	-0.331691	-0.509795	-0.394474	-0.412049	-0.474325	-0.309635	-0.411478	-0.355376	-0.632727	-0.32305	-0.618842
ARHGAP9	0.650892	0.409094	0.76499	0.368689	0.596744	0.669625	0.317305	0.699858	0.917605	0.675832	0.334448	0.694546	0.609795	0.698457	0.655462	0.51291	0.889323	1.05531	0.599895	0.805265	0.702565	0.547258	0.59277	0.652859	0.686992	0.486715	0.479414	0.572429
ARHGDIA	0.242318	0.27068	0.152397	0.0561894	0.220467	0.0150877	0.153359	0.0963162	0.104178	0.351462	0.249774	0.158802	0.26154	0.103891	0.210842	0.162168	0.0297749	0.0136941	0.140693	0.263674	0.147454	0.291796	0.0688738	-0.0519068	0.18979	-0.0889977	0.0638668	0.137881
ARHGDIB	-0.954564	-1.06923	-0.767022	-0.704887	-1.14674	-1.12614	-0.326087	-0.769941	-0.67597	0.189619	-0.623259	-0.838806	-0.515814	-0.760832	-0.894145	-0.884521	-0.635065	-0.7638	-0.62925	-0.811504	-0.301332	-0.851816	-0.762131	-0.69458	-0.838393	-0.579874	-0.496232	-0.230845
ARHGDIG	-0.266575	-0.390905	-0.253244	-0.491692	-0.123743	-0.235694	-0.225706	-0.217917	-0.543362	-0.0970393	-0.41	-0.224434	-0.351308	-0.184311	-0.438767	-0.148184	0.0324785	-0.230671	-0.166091	0.00451685	-0.344586	-0.0978489	-0.0429623	-0.186556	-0.0810488	0.00303955	-0.0770365	-0.00374039
ARHGEF1	0.105639	0.181199	0.146345	0.194026	0.133844	0.192373	0.0779864	-0.19672	0.170756	0.237124	0.320958	0.353845	0.319923	0.106874	0.375941	0.235675	0.406337	0.375411	0.0997893	0.433382	0.246565	0.199072	0.278415	0.240511	0.163666	0.178807	-0.234254	0.243026
ARHGEF10	-0.52706	-0.796779	-0.5329	-0.695702	-0.307131	-0.65052	-0.409625	-0.41	-0.572008	-0.761151	-0.523452	-0.732774	-1.04518	-0.491132	-0.170947	-0.466535	-0.478463	-0.430637	-0.50304	-0.502327	-0.670265	-0.436567	-0.455515	-0.221658	-0.453688	-0.356919	-0.325073	-0.392815
ARHGEF10L	0.35014	0.277767	0.234632	0.284693	0.178337	0.316711	0.389102	0.305097	0.343854	0.415117	0.444028	0.461636	0.418234	0.422093	0.524924	0.542352	0.618389	0.539271	0.569072	0.569539	0.389665	0.603951	0.481306	0.477257	0.472802	0.540052	0.44583	0.717558
ARHGEF11	-0.202397	-0.286662	-0.12348	0.0375956	-0.0797695	-0.0088076	-0.00234752	0.0428692	-0.153545	-0.14672	-0.148971	-0.212255	-0.312299	-0.0507079	0.116758	-0.246645	0.0605321	-0.0893841	-0.113664	-0.152063	-0.312959	0.0189254	-0.106539	-0.0971037	-0.0284227	0.0413366	0.0865703	0.00706025
ARHGEF12	-0.0191888	0.41809	-0.0189592	0.292904	-0.179696	0.0394895	0.414901	0.141648	0.01605	0.156314	0.164436	-0.040398	0.0777178	0.17616	0.158116	0.475952	0.226029	0.31719	0.562399	0.459229	0.234788	0.351598	0.386501	0.450255	0.341913	0.30143	0.319077	0.325097
ARHGEF15	-0.0821644	0.0754168	-0.0964607	0.0649795	0.196869	0.0883841	0.0466697	0.161338	0.0323236	-0.135538	-0.0979048	0.0308574	-0.0991806	0.128563	0.360636	0.14033	0.392592	0.343854	0.196079	0.26586	0.393867	0.233692	0.235209	0.483304	0.00504268	0.349902	0.294764	0.470626
ARHGEF16	0.197191	0.176353	0.521316	0.495802	0.483754	0.31719	0.655833	0.453931	0.614593	0.655462	0.41099	0.347557	0.496897	0.342027	0.435648	0.262537	0.275802	0.360229	0.163006	0.213432	0.602276	0.587819	0.401907	0.366753	0.333441	0.449123	0.37197	0.413866
ARHGEF17	0.154706	0.454166	0.4323	0.479653	0.269752	0.406685	0.56042	0.461902	0.404565	0.620098	0.537216	0.598227	0.696817	0.571746	0.51801	0.604358	0.517385	0.766183	0.543816	0.672946	0.584471	0.855687	0.553211	0.723142	0.581418	0.853499	0.73816	0.595098
ARHGEF18	0.101498	0.210312	-0.00841404	-0.145655	0.0430083	-0.0954805	0.120121	0.307902	-0.204336	-0.162093	-0.0217857	-0.309002	-0.28586	-0.144976	-0.0564555	-0.090192	-0.146945	-0.313048	-0.0379547	-0.00422464	-0.0912954	-0.14715	-0.124156	0.0910308	-0.119821	-0.283744	-0.169002	-0.237985
ARHGEF19	0.39366	0.450961	0.587048	0.291308	0.215532	0.444932	0.703579	0.301511	0.33527	0.529185	0.518245	0.59277	0.706064	0.426434	0.576327	0.488923	0.454833	0.461902	0.584044	0.315276	0.380388	0.541581	0.487253	0.154706	0.608887	0.658672	0.393329	0.243357
ARHGEF2	-0.860483	-0.829109	-0.855865	-0.578785	-0.667338	-0.728131	-0.629436	-0.659739	-0.895262	-0.784919	-0.761462	-0.738482	-0.831419	-0.861861	-0.812266	-0.655588	-0.898084	-0.518134	-0.713984	-0.600723	-0.787312	-0.673434	-1.11297	-0.908889	-0.745964	-0.788513	-0.819427	-1.0802
ARHGEF25	-0.131535	-0.075201	-0.0800209	0.0118733	0.00912169	0.0498247	-0.108578	-0.0852521	-0.00265573	-0.0728236	-0.0705004	0.0485347	-0.0145439	-0.011717	0.0482361	0.104814	-0.253966	-0.0339477	-0.0798848	-0.0777522	0.111027	0.0127489	0.121998	0.206871	-0.0938436	0.124314	0.131991	0.0386751
ARHGEF26-AS1	0.258276	0.263175	0.266007	0.175192	0.475312	0.26586	0.216993	-0.0106277	0.283639	0.21795	0.137425	0.278206	0.070028	-0.00593249	0.0978409	0.122342	0.0865703	0.0335942	0.209744	0.008031	0.00451685	0.12501	0.0218084	0.116468	0.0819386	0.112658	0.188722	0.172784
ARHGEF28	0.00601134	-0.104709	-0.00735579	0.00201317	-0.0366553	0.061542	0.0308574	-0.0785922	-0.151078	-0.0434965	-0.232172	-0.147974	-0.182809	-0.190341	-0.155237	-0.226412	-0.218349	-0.253142	-0.213923	-0.144615	-0.225887	-0.206752	-0.191294	0.00770975	-0.27145	-0.19781	-0.259978	-0.205398
ARHGEF3	-0.0976391	-0.19564	-0.0963137	-0.244099	-0.174925	-0.215498	-0.168482	-0.137385	-0.0334595	-0.169168	-0.183081	-0.0959197	-0.239798	-0.105411	0.00229735	-0.0310943	-0.0220286	-0.146582	-0.0744197	0.00342703	-0.036285	-0.0332743	0.0148632	-0.0116435	-0.0604909	0.0731346	-0.130007	0.157429
ARHGEF3-AS1	0.768408	0.464347	0.480441	0.556009	0.537792	0.621772	0.55908	0.485311	0.314021	0.413189	0.232961	0.370936	0.367849	0.285154	0.305437	0.431532	0.368414	0.413866	0.292363	0.506779	0.284596	0.320958	0.405688	0.317517	0.35203	0.313903	0.163472	0.265399
ARHGEF35	1.59196	1.28952	1.26788	1.60276	1.45716	1.48798	1.2978	1.12862	1.44277	1.10354	1.43509	1.51609	1.31435	1.42079	1.36486	1.28952	1.49799	1.13171	1.21234	1.16587	1.58019	1.53547	1.69316	1.51609	1.44277	1.36992	1.4134	1.45716
ARHGEF37	-0.0459291	-0.0707662	-0.191558	-0.0660441	-0.20761	-0.228147	0.150691	-0.00928483	0.0900671	0.254911	0.0752995	0.0160856	0.160135	0.262742	0.16766	0.278206	0.289523	0.243293	0.344918	0.306771	0.0827028	0.249063	-0.00218334	0.0993152	0.27184	0.2771	0.224207	0.154645
ARHGEF38	-0.0862871	-0.158353	-0.0359729	-0.0680556	-0.146945	-0.0961692	-0.230759	-0.115637	-0.138435	-0.204671	-0.219888	-0.218548	-0.264415	-0.109806	-0.184003	-0.19016	-0.151845	-0.246233	-0.123827	-0.22355	-0.161212	-0.219416	-0.245407	-0.401867	-0.0756777	-0.212592	-0.236582	-0.242141
ARHGEF4	-0.249271	-0.0104963	-0.051412	-0.224335	-0.284082	-0.0345578	-0.129509	-0.100295	-0.42444	-0.111784	-0.0782711	-0.0224956	-0.146773	-0.117252	-0.10307	0.344324	0.0317093	-0.0572096	0.120619	0.090124	0.192806	0.0548591	0.00129976	-0.286272	-0.112533	-0.0723013	0.0256439	0.192373
ARHGEF40	-0.528071	-0.248518	-0.270637	-0.160985	-0.243606	-0.223796	-0.189815	-0.18732	-0.511225	-0.267785	-0.475497	-0.404509	-0.2501	-0.241601	-0.458839	-0.401312	-0.476572	-0.600962	-0.621264	-0.480013	-0.194547	-0.112042	-0.45102	-0.190257	-0.152462	-0.112042	-0.189904	-0.142875
ARHGEF5	0.117878	0.0913969	0.128929	0.0569941	0.254561	0.253119	0.0827728	0.214482	0.0945762	0.0707261	0.0871462	0.0978996	0.0532815	-0.0835555	-0.0582243	-0.195726	-0.177523	-0.0961692	-0.0440507	0.0194214	0.0908973	0.0327325	0.123785	0.0841796	0.230359	-0.0115869	-0.0967654	-0.0917029
ARHGEF6	0.313716	0.0632999	0.120067	0.2317	0.232875	0.0697974	0.0466296	0.0376488	0.103636	0.155884	0.243534	0.264364	0.0353081	0.175756	0.0122363	0.305437	0.134877	0.408711	0.216869	0.324379	0.301511	0.487764	0.425869	0.3954	0.382745	0.464568	0.486986	0.340641
ARHGEF7	0.12207	0.173478	0.117441	0.0641161	0.208369	0.0872615	0.140157	0.150495	0.141413	0.186177	0.180351	0.0886492	0.0988943	0.22097	0.162878	0.254114	0.179315	0.157031	0.239655	0.184543	0.181881	0.253308	0.178878	0.177656	0.213477	0.0925247	0.206376	0.168696
ARHGEF9	0.452419	0.337382	0.21568	0.391087	0.270517	0.452419	0.472393	0.360008	0.513952	0.596744	0.352503	0.589289	0.577924	0.618882	0.391275	0.34591	0.388935	0.55646	0.540379	0.541942	0.477961	0.555577	0.592435	0.487542	0.590245	0.434474	0.535126	0.369874
ARID1A	0.039308	0.162609	0.108174	0.0516694	-0.182809	-0.00886958	0.0638008	0.0130678	0.0581203	0.144946	-0.0969225	-0.019936	0.0723979	-0.0910203	-0.366333	-0.0753816	0.0106754	0.0160116	-0.110334	-0.217726	0.0429393	0.100851	0.00434926	-0.25889	-0.182348	-0.0584689	-0.0195866	-0.462244
ARID1B	-0.121458	-0.0996447	-0.145879	-0.279868	-0.130563	-0.167254	-0.0452099	-0.0494507	-0.153028	-0.245233	-0.300145	-0.182465	-0.0338942	-0.262879	0.0062776	-0.0139386	-0.0259481	-0.068125	-0.0977095	0.122677	-0.0910861	0.0356205	0.0225184	0.0748052	0.154107	-0.0507079	-0.0210292	-0.0230718
ARID2	-0.628425	-0.725412	-0.58936	-0.827852	-0.786621	-0.758801	-0.755139	-0.808544	-0.809227	-0.842514	-0.370875	-0.749646	-0.661869	-0.748214	-0.508656	-0.638518	-0.627739	-0.468307	-0.455129	-0.725412	-0.640776	-0.588403	-0.657905	-0.679053	-0.553783	-0.349642	-0.604882	-0.656193
ARID3A	-0.010284	0.169086	-0.15681	-0.320352	-0.0573582	-0.098947	-0.16068	-0.201198	-0.18003	-0.223171	-0.176744	-0.205301	-0.213016	-0.131766	-0.0870177	-0.0339477	-0.0300808	-0.00906758	-0.071548	-0.0671376	-0.0163974	0.0666063	0.0808935	0.0765475	-0.19631	-0.0727565	-0.0300254	-0.130697
ARID3B	0.14009	0.122942	0.15362	0.368256	0.167343	0.206802	0.102728	0.16766	0.253437	0.0978409	0.270818	0.269411	0.0764815	0.196361	0.288004	0.290949	0.0866317	0.0645379	0.11216	0.134282	-0.0623717	0.101498	0.138479	-0.00165887	-0.0742975	0.0499647	0.147367	0.0594989
ARID4A	0.0437278	0.280724	0.0761313	0.0455731	0.175877	0.216735	-0.119047	0.0739461	0.0294358	0.131183	-0.0771083	0.0526189	0.0257535	0.0349707	-0.0201096	-0.0277439	-0.0531061	0.102529	0.105948	0.178937	0.109497	-0.0904906	0.0827028	-0.0188265	0.0662006	-0.0247765	-0.0327674	-0.0660441
ARID4B	0.113746	0.0175843	0.147627	0.0348303	0.164124	0.247336	0.0688738	0.294105	0.318156	-0.0282635	0.090525	0.152211	0.281899	0.207571	0.193743	0.1387	0.113629	0.133462	0.0868587	0.229177	-0.016104	0.201919	0.0677698	-0.0104181	0.0692985	0.1387	0.0563063	0.0740785
ARID5A	0.560866	0.355367	0.00504268	0.210395	0.234788	0.35881	0.558664	0.306099	0.382331	0.590836	0.450008	0.276497	0.226711	0.231394	0.335362	0.667252	0.265705	0.268544	0.536722	0.47997	0.452929	0.467841	0.693757	0.727531	0.435136	0.474252	0.527259	0.546908
ARID5B	-0.0675737	-0.0615859	-0.0978489	-0.0848347	-0.161456	-0.145965	0.0114078	0.191728	0.16222	0.120619	-0.0710153	-0.165513	0.0174705	0.257559	0.434311	0.126391	0.251683	0.0579307	0.354603	0.0438415	0.245976	0.188841	0.237896	0.144946	0.133276	0.154999	0.256801	0.333441
ARIH1	-0.0463803	-0.244747	-0.290365	-0.302137	-0.191196	-0.108578	-0.324121	-0.154345	-0.00144274	-0.235507	-0.130848	-0.222085	-0.220076	-0.193297	-0.28746	-0.273661	-0.238728	-0.28568	-0.207296	-0.14665	-0.282556	-0.216057	-0.345553	-0.378863	-0.273962	-0.364121	-0.288024	-0.364366
ARIH2	-0.108822	-0.322467	-0.313667	-0.227481	-0.196455	-0.110644	-0.215787	-0.112708	-0.194156	-0.234595	-0.270525	-0.255557	-0.20779	0.0195966	-0.0318542	-0.0694573	-0.126531	0.00516299	-0.0939063	-0.0837798	-0.165906	-0.0125338	0.0621422	-0.0135391	-0.0904906	0.0517466	0.0850082	0.0390749
ARL1	-0.381441	-0.492691	-0.478137	-0.585372	-0.487165	-0.586214	-0.779913	-0.772884	-0.3813	-0.402899	-0.381684	-0.526253	-0.301478	-0.746321	-0.287547	-0.353823	-0.326859	-0.387001	-0.12266	-0.489338	-0.321812	-0.403076	-0.596047	-0.54417	-0.231547	-0.318141	-0.0829175	-0.0247223
ARL10	-0.0262102	0.102006	0.0675913	-0.0519822	0.0578273	0.235913	0.148125	-0.253634	0.21209	0.0143514	0.223035	-0.157898	0.0672176	0.0203661	0.0422468	0.148705	-0.0287991	0.315276	0.0115912	0.150306	-0.145879	0.34591	0.118614	0.00592456	0.103766	0.29045	0.152535	0.200432
ARL11	-0.0436305	-0.253834	0.104814	-0.0833586	0.145815	0.012429	-0.117891	0.0257042	-0.0975581	-0.205026	-0.187576	-0.245233	-0.29918	-0.169802	-0.210018	-0.157987	-0.404772	-0.441061	-0.355767	-0.2255	-0.277779	-0.464297	-0.364808	-0.534841	-0.288801	-0.472945	-0.708739	-0.493086
ARL13A	0.437991	0.55703	0.65483	0.453356	0.768408	0.607269	0.545064	0.586602	0.88743	0.925191	0.640951	0.96539	0.679565	0.863999	0.199662	0.322634	0.53893	0.567701	0.477961	0.515092	0.317922	0.388143	0.385572	0.46324	0.197191	0.435894	0.0738849	0.256618
ARL13B	-0.112791	-0.430192	-0.121874	-0.535999	-0.352917	-0.103006	-0.164467	-0.332907	-0.352558	-0.267011	-0.271753	-0.133916	-0.299778	-0.370459	-0.468775	-0.317575	-0.462578	-0.214828	-0.1783	-0.314827	-0.0606016	-0.249666	-0.503371	-0.510016	-0.0809775	-0.27838	-0.0324852	-0.398047
ARL15	0.0545963	0.219596	-0.0714038	0.295764	0.212763	0.23686	0.427977	0.0809738	0.264791	0.200299	0.231312	0.206305	0.210935	0.000603638	0.236707	0.221549	0.0666063	-0.217071	0.0247622	0.0748052	0.035091	0.256801	0.16222	0.441836	0.0932806	0.181698	0.294211	0.266278
ARL17B	0.19223	0.198872	0.213677	0.252362	0.291114	0.186177	0.167801	-0.109738	0.20817	0.494047	0.143812	0.118097	0.246293	0.59369	0.187139	0.169692	0.339118	-0.114651	0.264364	0.279024	0.051128	0.0524995	-0.0906247	-0.0373882	-0.164249	0.307116	-0.245733	-0.0547841
ARL2BP	-0.162336	0.218593	-0.0462522	-0.0629488	-0.261135	-0.241601	0.10785	-0.362012	-0.135813	-0.130347	-0.056604	-0.109499	-0.105971	0.0469926	0.203053	-0.0253461	0.254822	0.10996	-0.0920049	0.0806696	-0.00409716	0.109563	0.00319944	-0.0893019	0.0694255	-0.0131836	0.0736589	0.199072
ARL3	-0.113863	-0.0149747	0.0723979	-0.167479	-0.112252	-0.128345	-0.48096	0.130159	-0.0669769	-0.0229648	0.136548	0.0994467	-0.130974	-0.113462	0.0884241	0.202266	0.354971	0.195455	0.173802	0.196121	-0.241601	-0.0744892	0.128396	0.0428353	0.103706	-0.115704	-0.246572	-0.132793
ARL4A	-0.45135	-0.260584	-0.259217	-0.400389	-0.208934	-0.439791	-0.482462	-0.380004	-0.703873	-0.519327	-0.534245	-0.451188	-0.512302	-0.551561	-0.608531	-0.371576	-0.70255	-0.526886	-0.613325	-0.662894	-0.692899	-0.759488	-0.890741	-0.999231	-0.707556	-0.869011	-0.70693	-0.399558
ARL4C	0.343566	0.611464	0.338434	0.588323	0.78792	0.44841	0.123331	0.309833	0.393329	1.25561	0.287533	0.389102	0.360385	0.0936959	0.242931	0.00963773	0.144604	0.227584	0.0578804	0.0202351	-0.0355871	0.156952	0.0884913	0.165511	0.0262301	0.157996	0.145815	0.35783
ARL4D	-0.0539585	0.057773	0.0510066	-0.244458	-0.107298	-0.138195	-0.0659065	-0.110334	-0.000958208	0.180772	-0.157263	-0.0327674	0.157572	0.213203	-0.124591	0.136548	0.266086	0.226711	0.137199	0.0773689	0.196079	0.21842	0.0583307	-0.197701	0.322738	0.172405	0.114523	0.228676
ARL5A	-0.137385	-0.275946	-0.180456	0.0377574	-0.0966312	-0.152661	0.0408432	0.20477	0.106934	-0.00916207	0.0300316	-0.0159772	0.0809738	0.0121728	-0.144036	0.0245056	0.278316	0.0815153	0.0447162	0.040156	0.120495	0.0339093	0.125898	0.0907726	0.250631	0.0333509	0.205286	0.403186
ARL5B	-0.301931	-0.2699	-0.301478	-0.197604	-0.087471	-0.0245004	-0.39262	-0.0512006	-0.257485	-0.31056	-0.249994	-0.099946	-0.261448	-0.257047	-0.0419086	-0.226105	-0.323135	-0.117962	-0.204479	-0.283283	-0.166943	-0.136931	-0.294331	0.0516694	-0.251675	-0.111784	-0.347139	-0.334153
ARL6	-0.0403383	0.217281	0.202192	-0.141114	0.0767645	-0.110001	-0.0906247	0.171236	-0.0323728	-0.0780447	0.0353081	-0.137676	-0.0540232	-0.037882	-0.0795842	0.0899541	-0.0880133	0.121807	0.111488	-0.181227	-0.150748	-0.153088	-0.23577	-0.177936	-0.227696	-0.0835061	-0.110718	-0.1802
ARL6IP1	-1.00853	-0.824705	-0.700891	-0.903993	-0.83213	-1.2388	-1.27729	-1.173	-1.27212	-1.22177	-1.31325	-1.17217	-1.37055	-1.38764	-1.30158	-0.910603	-1.15418	-0.92215	-1.02385	-0.941164	-1.05906	-1.19679	-1.34387	-1.43414	-0.917739	-1.13522	-0.777334	-0.933155
ARL6IP5	0.403987	0.22288	0.0154224	0.455861	0.176811	0.290653	0.484046	0.194848	0.242253	0.473552	0.344506	0.482545	0.340641	0.298416	0.310556	0.361265	0.729749	0.466257	0.356426	0.358226	0.338866	0.465806	0.252001	0.570344	0.343708	0.413664	0.440544	0.55703
ARL6IP6	-0.468307	-0.565214	-0.551759	-0.515459	-0.584262	-0.627739	-0.379576	-0.521209	-0.529621	-0.565438	-0.74434	-0.458839	-0.430192	-0.389562	-0.541269	-0.591544	-0.499326	-0.486833	-0.557416	-0.445057	-0.575134	-0.395959	-0.529621	-0.577708	-0.548902	-0.44247	-0.407505	-0.526886
ARL8A	-0.142271	-0.184483	-0.257308	-0.117087	-0.110484	-0.125104	-0.127653	-0.13301	-0.17457	-0.212416	-0.0606016	0.0918842	-0.327736	-0.0864979	-0.135647	-0.147406	-0.223796	-0.01788	-0.157814	-0.0865709	-0.26762	-0.0287351	-0.20485	0.00897588	0.0646193	-0.0648853	-0.0825271	-0.0440507
ARL8B	-0.166378	0.0725626	-0.037882	-0.160525	-0.208683	-0.112109	0.382468	-0.282449	-0.292333	-0.0308283	0.0190803	-0.169002	-0.144909	-0.0061089	0.281089	0.403501	0.263674	0.194087	0.520763	0.408925	0.166504	0.168161	0.327582	0.0207491	0.153299	0.444703	0.151004	0.237039
ARL9	0.087689	0.226459	0.180032	0.227785	0.314312	0.208369	0.377623	0.203522	-0.0915572	0.102264	0.0717987	0.00601134	-0.00265573	0.204347	0.222955	-0.112654	-0.105472	0.112536	-0.0115295	-0.147908	-0.0061089	0.224287	0.0518236	-0.0725663	0.17421	0.0339093	0.0737373	-0.00513814
ARMC1	-0.444732	-0.397176	-0.408303	-0.512302	-0.223085	-0.370765	-0.440233	-0.304909	-0.534245	-0.502151	-0.218679	-0.349232	-0.400278	-0.445628	-0.193454	0.00861175	-0.113009	-0.0889112	-0.36252	-0.190773	-0.454652	-0.280523	-0.3175	-0.14715	-0.418094	-0.111646	-0.232172	-0.32532
ARMC10	0.312342	0.17374	0.398292	0.0298363	0.34935	-0.0596219	-0.157011	0.0252313	-0.0515406	0.233115	-0.186968	-0.128005	-0.15872	-0.400786	-0.0617749	-0.23399	-0.0723013	-0.282356	0.11009	-0.391045	0.0224458	0.0250386	0.0641594	-0.0413955	0.0978996	0.0618415	-0.221658	0.152783
ARMC2	0.168336	0.125898	0.314774	0.381978	0.196168	0.133609	0.0551594	0.110896	0.135393	0.171109	0.152314	0.164659	0.292363	0.191441	0.242162	0.170216	0.267126	0.299522	0.185286	0.144108	0.148582	0.184362	0.204576	0.174654	0.180611	0.238992	0.0621948	0.226561
ARMC3	0.434474	0.394519	0.25845	0.214235	0.193645	0.204097	0.139746	0.368775	0.84342	0.39672	0.213833	0.374917	0.322204	0.459698	0.224515	0.222434	0.175192	0.23877	0.183023	0.142882	0.195357	0.32815	0.174116	0.330562	0.190719	0.327686	0.240154	0.0888107
ARMC4	0.0432102	-0.0195866	-0.0301398	0.051619	-0.0349331	0.0131931	-0.0388496	0.0917749	-0.000508413	0.0362001	-0.134141	0.0576029	0.040156	-0.00911974	-0.0671376	-0.0480269	0.0195278	0.051128	-0.109374	-0.113009	0.00504268	0.0551594	-0.0500224	-0.165374	0.00196268	0.0121728	0.135844	-0.0867064
ARMC6	0.140775	0.0452169	-0.0997829	0.0276923	-0.0402819	-0.0308283	0.0972585	0.0645379	0.220006	0.352854	0.169749	0.170685	0.288999	0.119881	0.312688	0.116643	0.144289	0.130286	0.38407	0.143591	0.104178	0.19694	0.120868	0.0574084	0.0581989	0.212665	0.146996	0.236707
ARMC7	0.232594	0.373394	0.323743	0.362628	0.110719	0.258702	0.240511	-0.0891663	0.108253	0.107211	0.326399	0.167579	0.378546	0.222735	0.0764815	0.0990478	0.169749	0.173424	0.20935	0.392906	0.178534	0.0773171	0.0589747	-0.232172	0.193026	0.218902	0.390185	0.170473
ARMC8	0.14099	0.251301	0.0698436	0.141648	0.052692	0.0843485	0.189213	0.087213	0.0117241	0.285616	0.117642	0.0993152	0.0112455	0.0692392	0.0755775	0.252931	0.19836	-0.0210292	0.117754	-0.0995586	0.142085	0.151343	-0.00341048	0.158736	0.0451646	0.0226155	0.114641	0.144387
ARMC9	-0.161456	-0.225971	-0.229757	-0.288481	-0.262444	-0.184483	-0.116068	-0.237902	-0.302358	-0.243524	-0.300238	-0.202913	-0.326751	-0.173016	-0.107298	-0.227979	-0.173579	-0.206395	-0.294567	-0.215955	-0.345553	-0.185869	-0.346368	-0.4415	-0.180655	-0.200807	-0.19209	-0.339292
ARMCX1	0.369271	-0.353823	0.072129	-0.24566	-0.1851	0.0302817	-0.185199	0.505047	0.0324337	-0.570546	0.0530256	0.296011	-0.121874	-0.256434	0.197942	0.119049	0.744082	-0.148752	0.392592	0.285722	0.109832	0.446175	0.193686	0.540052	0.712588	0.372395	0.595098	0.490373
ARMCX2	-0.420573	-0.639747	-0.419274	-0.26157	-0.442598	-0.246067	-0.364366	0.105774	-0.250734	-0.237262	-0.0749239	-0.0742172	-0.206931	-0.242416	-0.274748	-0.0646865	0.52669	0.293012	-0.164249	0.131718	0.106744	-0.00764938	-0.123908	0.01718	-0.108957	-0.023583	0.0299801	0.0877657
ARMCX3	0.18449	0.105229	0.209896	0.0278597	0.266855	0.234371	0.0736589	0.493469	0.197329	0.131718	0.15269	0.356907	0.0393734	0.210312	0.0784649	0.178615	0.0993781	-0.00722591	-0.0482539	0.220674	0.321223	0.248002	0.28611	0.343192	0.453931	0.107379	-0.0471868	0.0831019
ARMCX5	0.226296	0.18274	0.269752	0.349634	0.151751	0.0959124	0.124314	0.225535	0.117019	0.154999	0.230975	0.200365	0.250469	0.0416599	0.237896	0.161009	0.0683482	0.0583307	0.093513	0.0139388	-0.00522891	-0.00506597	0.0238943	0.0541375	-0.0657911	0.209069	0.0698436	0.0678646
ARMCX6	-0.36451	-0.501605	-0.375246	-0.0641848	-0.409485	-0.181549	-0.37308	-0.327847	-0.223008	-0.196455	-0.24343	-0.0688937	-0.398728	-0.201744	-0.341313	-0.0505129	-0.129421	-0.0306315	-0.379259	-0.169322	-0.145199	-0.442598	-0.185929	-0.250969	-0.227569	0.034253	-0.0193713	-0.0977095
ARMT1	-0.398463	-0.0540854	-0.0095793	-0.140128	-0.251594	-0.10272	-0.164388	-0.0445281	-0.238881	-0.200719	-0.210182	-0.09777	-0.141891	-0.183081	-0.0441158	-0.300793	-0.396756	-0.197952	-0.515256	0.128707	-0.244191	-0.2255	-0.152969	0.00833551	-0.515459	-0.354215	-0.348268	-0.353203
ARNT	0.0648582	0.283957	0.228628	0.0634516	0.121666	0.232099	0.0413003	0.0204843	0.176288	0.196121	0.150363	0.385224	0.141768	0.280504	-0.00522891	0.0953478	0.17374	0.222095	0.017356	0.101683	0.186177	0.103222	-0.000958208	-0.0443322	0.0995981	-0.0215163	0.0791006	-0.0396079
ARNT2	0.0260773	0.00592456	-0.0314203	-0.298322	-0.0678346	-0.364121	-0.339726	-0.100846	0.233584	0.0519655	-0.162985	-0.464624	-0.108009	-0.0961692	0.105057	-0.131997	0.08596	0.0814091	0.0771863	0.0455132	0.108924	0.255001	0.0299288	0.128396	0.19491	0.227083	-0.086428	0.237758
ARNTL	-0.154107	0.169692	0.243237	0.0638008	0.031478	-0.0638845	-0.0191251	0.176515	0.0641161	0.0736589	0.235913	0.146089	0.083019	-0.0989884	0.0531513	0.0591337	-0.00239457	-0.506083	0.147237	-0.0417281	-0.117087	-0.233375	-0.165151	-0.239208	-0.133696	-0.151138	-0.188362	-0.0732157
ARNTL2	-0.900243	-0.459097	-1.10352	-0.817414	-0.891668	-1.01774	-0.855865	-1.02744	-0.939522	-0.899881	-1.0623	-1.02618	-1.23972	-0.780702	-1.23679	-1.04584	-0.963466	-0.571747	-0.842514	-0.952369	-0.821938	-0.688364	-0.910603	-0.855057	-0.730432	-0.617245	-0.65694	-0.6161
ARPC1A	-0.845485	-0.743701	-0.891668	-0.541924	-0.624424	-0.652213	-0.669146	-0.58726	-0.510193	-0.608821	-0.659883	-0.525177	-0.667885	-0.440369	-0.774984	-1.12242	-0.89491	-1.06476	-0.887667	-1.0012	-0.825036	-0.576522	-0.559621	-0.514832	-0.860017	-0.857833	-0.8437	-0.826269
ARPC1B	-0.0202445	-0.151359	-0.130081	-0.0399204	0.079857	-0.204598	0.0204211	-0.1191	-0.0407971	-0.074147	-0.197604	-0.114421	-0.136632	-0.0692341	-0.0498985	0.107165	-0.0134809	-0.122741	-0.00183742	0.0311567	-0.324499	-0.110644	-0.00456226	-0.0826406	-0.0980987	-0.0940851	0.034035	-0.347712
ARPC2	-1.3107	-1.02815	-1.38764	-1.30551	-1.19894	-1.35906	-1.46337	-1.20872	-1.17991	-1.40332	-1.54931	-0.939522	-1.3818	-0.920744	-1.4194	-1.30953	-1.35019	-1.3464	-1.35633	-1.3464	-1.50005	-1.19554	-1.19263	-1.28303	-1.44559	-1.53037	-1.5229	-1.44942
ARPC3	-2.15136	-1.83264	-1.9191	-1.39647	-2.0468	-1.95037	-1.15988	-1.81262	-1.71702	-0.839082	-1.37362	-1.74246	-1.52772	-1.78479	-1.88389	-1.88389	-1.92471	-2.10785	-1.84524	-1.94339	-1.63084	-1.86215	-1.6939	-1.42872	-1.98978	-1.83264	-1.66943	-1.50163
ARPC4	-0.0845377	0.390794	0.227165	0.360008	-0.0276868	0.212366	0.796278	0.389865	0.184718	0.481577	0.422283	0.324953	0.648946	0.356814	0.251127	0.199381	0.516409	0.394355	0.359096	0.336408	0.365325	0.468094	0.147749	0.0232062	0.19711	0.269336	0.0127797	0.232961
ARPC5L	0.0541375	-0.0503411	0.113178	0.0828459	0.0848656	-0.0187598	-0.0879578	0.102819	-0.0519822	-0.208528	-0.179696	-0.117519	-0.236773	-0.10386	-0.170457	-0.119821	0.00996255	-0.185324	-0.113759	-0.0729504	-0.21668	0.0978996	-0.0827258	0.0990478	-0.0510994	-0.109286	0.0989555	0.0571685
ARPIN	0.0896984	0.0319013	-0.112947	-0.197417	0.0930749	-0.209547	-0.224709	-0.127246	-0.353823	-0.119355	-0.320352	-0.0594783	-0.111876	0.0456431	-0.111949	-0.083454	-0.115853	-0.0520452	-0.12217	-0.142147	0.0200779	0.0482361	0.127241	-0.27196	0.185445	0.271216	0.0565077	-0.0652577
ARPP19	-0.480823	-0.382838	-0.389027	-0.404509	-0.435827	-0.470362	-0.235998	-0.403365	-0.498025	-0.522186	-0.31581	-0.444152	-0.324818	-0.67629	-0.54634	-0.529621	-0.531364	-0.565438	-0.494974	-0.727846	-0.484927	-0.520991	-0.587713	-0.775351	-0.628425	-0.600427	-0.756159	-0.538568
ARPP21	-0.104486	0.0763125	0.143535	-0.0415207	0.0463934	0.0972585	0.0836414	0.20291	-0.0903772	-0.026047	-0.0502523	-0.0542496	-0.0393257	0.0865703	-0.0710153	-0.0410924	-0.0302034	-0.0300254	0.0694255	0.0848215	-0.036815	0.0534075	-0.0805822	-0.153914	-0.00621893	-0.0671376	-0.120923	-0.0725663
ARR3	-0.0181397	0.129495	-0.117457	0.12371	-0.054827	-0.0808236	0.283639	0.0722014	-0.0200577	-0.0656889	0.0668155	0.0500595	-0.0569933	0.0616698	0.0681513	-0.0411911	0.269336	0.135573	0.2509	0.151052	0.136025	0.01605	0.11216	0.0980477	0.175611	0.15198	0.0764337	0.0117241
ARRB1	0.214884	0.21292	0.125506	0.10996	0.236948	0.207238	0.175409	0.22741	0.210775	0.314021	0.0702133	0.284771	0.207807	0.217206	0.138333	0.164436	0.178249	0.0636122	0.131069	0.101893	0.28162	0.249625	0.249136	0.168336	0.195243	0.211348	0.00784559	0.121575
ARRB2	0.817563	0.370134	0.370445	0.832865	0.929152	1.33417	0.643694	0.77453	0.552089	1.1411	0.782376	0.911018	0.539608	0.724031	0.750454	0.846483	0.611464	0.713385	0.667945	0.777337	0.65483	0.639575	0.510976	0.603298	0.419341	0.488923	0.360516	0.486493
ARRDC1	0.046337	0.0357901	0.120267	0.318476	0.165104	0.0395557	0.198066	0.149758	0.133783	0.113977	0.0997893	0.0717218	0.179169	0.105057	0.296223	0.206802	0.258155	0.0657459	0.174278	0.128929	0.17755	0.164659	0.169547	0.324124	0.215959	0.153803	0.216384	0.308036
ARRDC2	-0.16568	-0.155096	-0.25794	-0.108076	-0.112182	0.0144654	-0.0850659	-0.15399	-0.345234	-0.207099	-0.165818	-0.0496905	-0.162093	-0.751397	-0.160774	-0.29842	-0.129956	-0.306201	0.213923	-0.319683	-0.156429	-0.120541	-0.0054455	0.175271	-0.312061	-0.167479	-0.0872959	0.0517466
ARSA	0.0278597	-0.272979	-0.269023	-0.115346	-0.134874	-0.102028	-0.258294	0.0808399	-0.351992	-0.532674	-0.247413	-0.294202	-0.332664	-0.246645	-0.0221593	-0.0283545	-0.154747	-0.10272	-0.264176	-0.0826406	-0.166378	0.0418677	-0.0211397	0.0478465	-0.0345578	-0.0130079	-0.203294	-0.135538
ARSB	-0.0463179	-0.0244335	-0.151285	0.10476	0.0189812	0.0108866	-0.228992	-0.227838	0.00335144	0.141815	-0.01017	0.0903322	0.134384	0.0694836	-0.102357	-0.122025	-0.0600753	0.0365904	-0.130563	-0.164781	-0.0831773	-0.0174992	-0.0464956	-0.0197443	-0.131853	-0.0313523	-0.0740864	-0.0154429
ARSD	0.0280346	0.158314	0.0561894	0.123785	0.0355574	0.0844633	0.0565536	0.0848656	0.0266212	0.103557	-0.045524	0.0739461	0.12478	0.208672	0.0849186	0.00434926	0.156172	0.185357	0.117089	0.0811997	0.271547	0.139148	0.0654578	0.154873	0.298827	0.0762503	0.0115912	0.153856
ARSE	-0.572468	-0.608531	-0.403657	-0.4978	-0.7414	-0.512426	-0.702311	-0.841083	-0.416087	-0.339726	-0.450409	-0.466861	-0.10155	-0.40854	-0.485137	-0.160229	-0.428515	-0.391212	-0.339835	-0.502891	-0.36468	-0.378412	-0.344586	-0.508471	-0.477485	-0.081534	-0.477636	-0.353823
ARSF	0.159324	0.383579	0.450961	0.261694	0.448909	0.292122	0.181056	0.0365322	0.282516	0.168568	0.224954	0.210395	0.180978	0.323863	0.116869	0.0625482	0.270124	0.233263	0.206159	0.352503	0.384243	0.330442	0.288891	0.0493689	0.524478	0.275366	0.383907	0.2762
ARSG	-0.264822	-0.0995178	-0.321812	-0.286046	-0.303313	-0.380752	-0.249169	-0.206931	-0.379146	-0.337548	-0.276536	-0.275181	-0.246957	-0.173869	-0.306424	-0.275181	-0.23718	-0.150544	-0.266203	-0.290878	-0.161456	-0.124948	-0.285957	-0.356919	-0.306566	-0.191914	-0.263263	-0.211719
ARSK	-0.400042	-0.290365	-0.31056	-0.249359	-0.206841	-0.279386	-0.325481	-0.202397	-0.322731	-0.258083	-0.248059	-0.273291	-0.202025	-0.319036	-0.173744	-0.19556	-0.239543	-0.195472	-0.164545	-0.212097	-0.164781	-0.223171	-0.198854	-0.31581	-0.126288	-0.29466	-0.389298	-0.336191
ART3	0.96539	0.972612	1.10166	1.06945	1.07855	0.917605	0.544777	0.905158	1.4701	0.929152	0.932352	1.11158	1.13171	1.0196	0.945715	0.796278	0.739151	0.614593	0.736176	0.596744	1.02148	0.832865	1.00592	1.02764	0.972612	0.733091	0.877075	1.09057
ART4	0.243534	0.0783381	0.137811	-0.025291	0.124256	0.0799184	-0.00576746	0.0742302	0.0299801	0.141413	0.119514	-0.0532153	0.0458705	-0.173502	0.0913299	0.0299288	0.0777178	0.0843485	0.122525	0.132366	0.0659061	-0.0618438	0.100617	-0.139709	-0.0220286	0.00201317	0.0414493	0.0445422
ARVCF	0.0669045	0.185213	0.15771	0.219596	0.325528	0.233323	0.15075	0.227904	0.0499647	0.0955213	0.389102	-0.00942076	0.108807	0.173015	0.289304	0.262438	0.207623	0.0989555	0.105901	0.153222	0.261314	0.363043	0.29493	0.183023	0.206376	0.228748	0.228433	0.23877
ARX	-0.0748798	-0.0462522	-0.337284	-0.0157848	0.0757317	0.00129976	-0.358758	-0.149872	-0.233855	-0.0494507	-0.0474564	0.143872	-0.0787267	-0.0639473	0.0138704	0.0237783	-0.0987656	-0.263471	-0.113088	0.0786692	-0.167254	-0.233448	-0.137385	0.0878307	-0.0788415	-0.0695915	0.0983914	-0.0111031
AS3MT	0.266945	0.213087	0.431141	0.342171	0.391275	0.110138	0.296136	0.368029	0.464823	0.1158	0.288891	0.207571	0.245272	0.184644	0.220818	0.0915068	0.23063	0.179578	0.155162	0.109893	0.283733	0.182811	0.191585	-0.0334595	0.209966	0.0605321	0.0921677	0.0300316
ASAH1	2.19824	1.45716	1.96017	2.13133	1.83512	1.96017	1.48144	2.16648	2.16648	1.71097	1.84977	2.19824	2.03829	2.058	2.41343	2.6512	2.95443	2.70196	2.3706	2.70196	2.59121	2.80393	2.25094	2.22503	2.6512	3.01381	2.32917	2.75233
ASAP1	-0.36747	-0.34702	-0.458839	-0.650849	-0.495416	-0.505122	-0.547089	-0.601233	-0.64532	-0.539424	-0.785843	-0.705816	-0.73435	-0.599414	-0.752591	-0.637489	-0.749258	-0.828133	-0.773239	-0.710262	-0.690516	-0.739907	-0.879692	-0.628679	-0.687046	-0.727846	-0.782013	-0.641539
ASAP2	-0.292683	-0.240405	-0.3653	-0.559217	-0.260584	-0.270396	-0.657644	-0.340357	-0.438454	-0.903993	-0.373178	-0.135734	-0.616246	-0.45135	-0.612659	-0.413469	-0.7456	-0.600723	-0.496232	-0.464431	-0.675359	-0.54552	-0.281755	-0.677128	-0.696602	-0.54417	-0.36468	-0.478768
ASAP3	-0.0520452	0.0725214	0.0821724	0.374441	0.206159	0.380741	0.235521	0.166504	0.153359	0.18449	0.193244	0.303978	0.190782	0.224714	0.240511	0.170993	0.402318	0.392592	0.398138	0.196807	0.332783	0.223847	0.254479	0.0601664	0.108074	0.177272	0.123331	0.339323
ASB12	-0.0245004	-0.151635	-0.179846	-0.199452	-0.0590792	0.0100888	0.0861676	-0.174925	0.102996	-0.00189027	0.0271566	-0.0491988	-0.100096	-0.0494507	0.105701	-0.18749	-0.254656	-0.0548846	-0.0843711	0.0195966	-0.109806	0.0417598	-0.0191251	0.04688	-0.136045	-0.0997175	-0.117162	-0.178088
ASB14	-0.313048	-0.184137	-0.171507	-0.303025	-0.225971	-0.211549	-0.339574	-0.248899	-0.0432936	-0.144812	-0.215787	-0.247683	-0.143148	-0.159522	-0.192798	-0.454927	-0.385211	-0.223625	-0.406021	-0.334653	-0.359065	-0.19556	-0.286272	-0.384926	-0.291907	-0.345417	-0.353823	-0.238449
ASB3	-1.0922	-1.11076	-1.28686	-1.1615	-0.703873	-0.872023	-0.898503	-1.13005	-0.965157	-1.39239	-0.848804	-0.889401	-1.09718	-0.833605	-0.971884	-0.780702	-0.625241	-0.396308	-0.840313	-0.415798	-0.765821	-0.764924	-0.916693	-0.812967	-0.404918	-0.63094	-0.618842	-0.759488
ASB4	-0.169255	-0.0310296	-0.0571428	0.0669045	0.0321395	-0.0095793	-0.0861235	0.0880239	-0.0601442	-0.176	-0.079417	-0.0776746	-0.255245	-0.127593	-0.22423	0.0368789	0.090713	-0.106612	-0.0799544	-0.0679086	-0.00489504	-0.179027	-0.175264	-0.0604478	-0.208383	-0.148828	-0.201455	-0.164388
ASB5	0.204499	0.631415	0.410281	0.546613	0.15396	0.344803	0.212763	-0.394959	0.221632	0.158802	0.427534	0.424918	0.841984	0.245617	0.174116	-0.145509	0.20914	0.184362	0.0347831	0.429617	0.283957	0.280392	0.500185	0.217281	0.216595	0.0782127	0.140553	0.0304676
ASB6	0.365185	0.304394	0.467361	0.391407	0.460177	0.476566	0.508338	0.442683	0.238029	0.35203	0.420849	0.350327	0.144041	0.327154	0.213923	0.204028	0.0326744	0.204981	0.118202	0.182811	0.141062	0.0553172	-0.00205486	0.11513	0.162609	0.150495	0.0419985	0.188325
ASB7	0.0684052	0.106614	0.223847	0.174954	0.15785	0.172784	0.0268564	0.247184	0.208085	0.197549	0.0198252	0.072129	0.214983	-0.00347121	0.113629	0.0655627	0.0954772	0.175826	0.153551	-0.0657911	-0.0663115	0.128762	0.131855	-0.359799	0.0457736	-0.015312	-0.138121	0.19294
ASB8	0.31032	0.266356	0.298185	0.253636	0.207332	0.215333	0.153856	0.270818	0.252001	0.272713	0.484798	0.353715	0.34635	0.296533	0.484798	0.406685	0.48203	0.624266	0.449838	0.27518	0.316947	0.326399	0.361667	0.330027	0.167343	0.321721	0.376427	0.364909
ASB9	-0.938478	-0.57795	-0.662402	-1.05235	-0.909456	-0.788139	-1.12927	-0.514429	-1.02084	-0.883228	-1.07712	-0.485292	-0.92215	-0.805945	-0.679053	-0.692366	-0.751397	-0.983282	-0.988025	-1.05308	-0.669715	-0.742974	-0.920258	-0.723626	-0.656408	-0.849536	-0.67936	-0.905774
ASCC2	-0.104912	0.0481646	-0.106539	-0.114483	0.0333509	-0.212255	0.00190032	-0.151468	-0.173434	-0.187942	-0.0986944	0.0700572	-0.196885	-0.0284748	-0.380657	-0.187047	-0.122459	-0.174501	-0.187889	-0.176497	-0.0717954	0.100165	-0.00867557	-0.0584152	-0.189745	-0.0752824	-0.136836	-0.319357
ASCC3	0.0370376	0.0607938	0.0626103	-0.232388	0.0159541	0.00473144	-0.129956	-0.0043849	-0.143103	-0.0615445	-0.0215579	0.0764815	-0.24684	0.0507681	-0.111315	0.147627	-0.154601	-0.14672	0.0716646	-0.0520452	-0.0964607	-0.0154429	-0.200093	-0.152743	-0.0757473	-0.116589	-0.306201	-0.278715
ASCL1	-0.23285	-0.14151	-0.26744	-0.120625	-0.0402382	-0.113759	-0.033072	-0.146359	-0.13629	-0.136836	0.033645	0.0866317	-0.0188951	-0.100669	-0.010373	-0.187942	-0.135538	-0.00585521	-0.159064	0.0301548	-0.201285	-0.154048	-0.0604478	-0.294016	-0.126435	-0.204479	-0.331308	-0.113863
ASCL2	0.26031	0.188393	0.313903	0.353299	0.311411	0.303978	0.36324	0.175105	0.267348	0.0403554	0.257559	0.259163	0.187139	0.348847	0.04607	0.307365	0.133735	0.272335	0.355497	0.19694	0.151132	0.0215296	0.0833742	0.0846459	0.30641	-0.127861	0.285154	0.146412
ASCL4	0.351907	0.318865	0.105461	-0.0140001	0.26344	0.386322	0.259844	0.670981	0.068624	-0.0180883	0.463427	-0.0598389	0.194026	0.121172	0.247418	0.417534	0.295905	0.26586	0.22258	0.374441	0.567454	0.474041	0.379567	0.389665	0.496897	0.336279	0.167065	0.0433733
ASCL5	0.296997	0.492366	0.109232	0.0965591	0.384243	-0.349078	0.01718	0.330686	-0.220864	-0.514154	-0.0984788	0.0649795	-0.182546	-0.15681	-0.158535	-0.0614924	-0.103316	-0.180655	-0.315655	0.168778	-0.341696	-0.121722	0.0145287	-0.119408	0.0121728	-0.354473	-0.351308	0.105586
ASF1A	-0.614103	-1.00362	-0.787312	-0.372968	-0.908143	-0.468775	-0.937429	-0.861861	-0.686791	-0.923144	-0.540488	-0.91583	-0.626137	-0.927842	-0.844562	-0.616459	-0.655324	-0.746638	-0.978382	-0.864298	-0.451509	-0.910603	-0.4887	-0.557645	-0.618425	-0.575776	-0.605584	-0.693233
ASF1B	-0.232172	-0.23185	-0.368862	-0.22834	-0.321812	-0.447019	-0.336884	-0.442903	-0.363981	-0.236512	-0.562261	-0.136421	-0.19616	-0.199452	-0.544783	-0.264822	-0.416534	-0.0345578	-0.266018	-0.182465	-0.677128	-0.154526	-0.468463	-0.363594	-0.475338	-0.342335	-0.596205	-0.737413
ASGR1	-0.108578	0.227165	0.089896	-0.145293	0.35509	0.144387	0.257504	0.389301	0.152604	0.0871462	0.35629	0.0194214	0.125599	0.113076	0.280504	0.504518	0.119514	0.131855	0.264522	0.048465	-0.0816808	-0.116395	0.0472369	0.303648	0.155754	0.309521	0.0219831	0.610393
ASGR2	-0.253369	-0.0283545	-0.489674	-0.376545	-0.488897	-0.160308	-0.395315	-0.499326	0.0191972	-0.044387	-0.344586	-0.354215	0.0760404	-0.463096	-0.496358	-0.691564	-0.369939	-0.204336	-0.508831	-0.697556	-0.34448	-0.228077	-0.240405	-0.570723	-0.336989	-0.071548	-0.352701	-0.150748
ASH1L	-0.161786	-0.206239	-0.242141	-0.138435	-0.188146	-0.160985	-0.265443	-0.172211	-0.0624393	-0.188909	-0.25794	-0.27838	-0.218679	0.00265502	-0.282248	-0.328714	-0.278608	-0.238547	-0.311298	-0.353823	-0.285957	-0.16092	-0.27996	-0.211039	-0.307547	-0.307895	-0.291848	-0.169322
ASH2L	-0.713084	-1.02894	-0.751676	-0.956587	-0.852989	-0.911604	-1.59	-1.10502	-1.17393	-1.21196	-0.793243	-1.16065	-1.06054	-0.995414	-1.03078	-0.7121	-0.797445	-0.716043	-0.892352	-0.829109	-0.897677	-0.860887	-0.879233	-0.766123	-0.919271	-0.757493	-0.832946	-0.651606
ASIC1	0.352503	0.253508	0.637615	0.496679	0.499915	0.399268	0.365905	0.400225	0.337559	0.353715	0.397586	0.282362	0.269139	0.352359	0.308287	0.409906	0.438435	0.108511	0.308411	0.350019	0.244534	0.303978	0.376297	0.311164	0.450255	0.336122	0.431532	0.427183
ASIC2	0.337919	0.0816234	0.233759	0.301013	0.356041	0.348697	-0.0945489	0.146345	0.226922	0.156043	0.273161	0.249774	0.273654	0.314312	-0.100096	0.159952	0.318587	0.0982193	0.104597	0.19294	0.137314	0.102597	0.202418	0.313246	0.11357	-0.153758	-0.0452099	0.0814651
ASIC3	0.519512	0.786925	0.43414	0.584913	0.580636	0.760583	0.498094	0.448695	0.755902	0.523332	0.778295	0.525595	0.456119	0.573312	0.792402	0.637615	0.669625	0.701698	0.805265	0.653642	0.770497	0.647579	0.638877	0.932352	0.708487	0.515405	0.597266	0.780059
ASIP	-0.284185	-0.173204	-0.203185	-0.188306	-0.250816	-0.315031	-0.210375	-0.33162	-0.182693	-0.41291	-0.290132	-0.279491	-0.131468	-0.0809775	-0.266575	-0.326968	-0.215137	-0.332793	-0.352458	-0.212416	0.0409122	0.0656824	0.0233966	-0.29821	-0.140128	-0.287547	-0.0798124	-0.113204
ASL	-0.405726	-0.310057	-0.316706	-0.304157	-0.37257	-0.259153	-0.474325	-0.380522	-0.408303	-0.277059	-0.346486	-0.328936	-0.283744	-0.370875	-0.199014	-0.448229	-0.279386	-0.421966	-0.277153	-0.185418	-0.223171	-0.363496	-0.141366	-0.27838	-0.199084	-0.286803	-0.116589	-0.289935
ASMTL	-0.324818	-0.365202	-0.488897	-0.340193	-0.447148	-0.27838	-0.165993	-0.196002	-0.216463	-0.18808	-0.216148	-0.228077	-0.29466	0.084594	-0.117714	-0.221741	-0.111177	-0.0427795	-0.276048	-0.208331	-0.386259	-0.28869	-0.234692	-0.086844	-0.231197	-0.558779	-0.317377	-0.520561
ASNS	-1.46521	-1.26869	-1.04723	-1.6373	-1.6801	-1.67651	-1.12114	-1.62744	-1.57326	-0.540488	-1.61409	-1.61685	-1.38611	-1.76179	-1.39822	-1.87675	-1.32917	-1.30841	-1.46884	-1.51464	-1.21732	-1.76554	-1.47522	-2.08373	-1.11234	-1.28472	-1.35906	-1.55682
ASNSD1	-0.594301	-0.465295	-0.380004	-0.56615	-0.540065	-0.324499	-0.45135	-0.508831	-0.391592	-0.323878	-0.481808	-0.416354	-0.425799	-0.172306	-0.400786	-0.298949	-0.385332	-0.313573	-0.368391	-0.241512	-0.656676	-0.393303	-0.368043	-0.297064	-0.403792	-0.475865	-0.536729	-0.546155
ASPA	0.153803	0.0142269	0.0504705	0.111683	0.437479	0.381802	0.165511	0.248633	0.219338	0.0172913	0.170301	0.160275	0.170927	0.275497	0.0579307	0.126809	-0.0325437	0.0771267	0.193112	0.125506	0.239133	0.179913	0.215069	-0.188909	0.230032	0.162558	-0.123785	0.031281
ASPG	0.231927	0.15965	0.230893	0.27059	0.182455	0.320035	0.203365	0.385224	0.354603	0.238536	0.17421	0.26658	0.230032	0.276586	0.227165	0.298282	0.168022	0.223485	0.277576	0.307365	0.293794	0.257323	0.294105	0.271004	0.2095	0.0799597	0.172473	0.103142
ASPH	0.00446677	0.0449692	0.00633002	0.0598176	0.0480259	0.00790039	-0.0571428	0.037527	0.0103114	0.0890658	-0.0940851	-0.0120618	-0.075201	-0.0893019	-0.115293	-0.076522	-0.133202	-0.14665	-0.197604	-0.153028	-0.0789713	-0.119224	-0.110167	0.038742	-0.0190746	-0.0531551	-0.0594783	-0.101076
ASPM	-0.744686	-1.07935	-0.988025	-1.0875	-0.935998	-0.862771	-0.952871	-0.800179	-0.875239	-0.85471	-0.972434	-1.03563	-0.789654	-0.956192	-0.896262	-0.928509	-1.17711	-1.02084	-0.989405	-0.91583	-0.857027	-0.925308	-1.14896	-1.1615	-0.846392	-0.965157	-0.939522	-1.20258
ASPN	0.379729	0.404169	0.69521	1.2978	0.821219	0.7995	0.707687	0.998023	0.840644	0.578374	0.920187	0.817563	0.751103	0.744814	0.711919	0.976147	0.89475	0.779135	0.804208	0.871633	1.27782	1.31761	1.13352	1.10166	1.08705	1.15559	1.11444	1.30473
ASPRV1	-0.524108	-0.377951	-0.327615	-0.57473	-0.332793	-0.376828	-0.357471	-0.298075	-0.285957	-0.261046	-0.10075	-0.324121	-0.318141	-0.30394	-0.118575	-0.303378	-0.3485	-0.247808	-0.39262	-0.112875	-0.424916	0.00434926	-0.468119	-0.2451	-0.308894	-0.458839	-0.333418	-0.441805
ASRGL1	0.156898	0.163424	0.095855	-0.0773512	-0.122318	-0.00808825	0.236469	-0.0266237	0.15676	0.0831019	0.0723146	0.0530256	0.0305362	-0.021449	-0.0478194	-0.0508291	-0.044593	-0.307895	-0.214176	-0.228599	0.0406444	-0.00218334	-0.0172505	0.152857	-0.16092	-0.0718608	-0.0369558	0.112777
ASS1	-0.851307	-0.780297	-0.9213	-1.23576	-1.38939	-1.19377	-0.78316	-0.754612	-0.414551	-0.65694	-1.05402	-0.723626	-0.487773	-0.540683	-0.752989	-0.808238	-0.784919	-0.579221	-0.902297	-0.868428	-0.575776	-0.835465	-0.629832	-0.701207	-0.847151	-1.0303	-1.19488	-1.05701
ASTE1	-0.0731351	-0.134648	0.0091683	0.0494309	-0.0722469	-0.198037	-0.0852521	-0.0364031	0.0363861	-0.104779	0.125128	-0.362727	-0.173806	-0.177197	0.00422293	-0.127792	-0.214089	-0.0586393	-0.0370795	0.123331	0.0142885	-0.0885213	-0.17954	-0.0340252	-0.0411911	0.0269141	-0.236289	0.046337
ASTN1	0.208727	0.126718	0.0852365	0.145513	0.0252313	0.128762	0.374619	-0.042724	0.150187	0.168414	0.144163	0.0653933	0.1841	0.210681	0.256178	0.320285	0.224128	0.119995	0.251926	0.0425384	0.218833	0.169822	0.165511	0.247254	0.167801	0.267126	0.20935	0.12226
ASTN2	0.0957448	0.137262	0.0869637	0.115846	0.0282125	0.0949204	0.105229	0.00833551	0.0216784	0.0663847	0.0918842	0.114523	0.0472935	0.00548332	-0.0174281	-0.0590057	0.0695893	0.00561545	0.109179	-0.00183742	-0.0538849	0.116869	0.00259114	0.0659794	0.0392551	0.0725214	-0.0111691	0.0817929
ASUN	-0.191196	-0.23738	-0.19432	-0.420857	-0.272761	-0.473723	-0.980837	-0.366602	-0.632552	-0.40788	-0.378188	-0.328033	-0.440914	-0.378553	-0.305722	-0.344975	-0.400786	-0.268612	-0.403076	-0.0293717	-0.672208	-0.524108	-0.536212	-0.711791	-0.425663	-0.592476	-0.681281	-0.763439
ASXL1	-0.417442	-0.434087	-0.457416	-0.574946	-0.375246	-0.412464	-0.454927	-0.36451	-0.601233	-0.516622	-0.602457	-0.576766	-0.607231	-0.51955	-0.39945	-0.501024	-0.593116	-0.545126	-0.525638	-0.526064	-0.595276	-0.475167	-0.609689	-0.530672	-0.561794	-0.493283	-0.438454	-0.591117
ASXL2	0.315612	0.385108	0.269336	0.190585	0.314431	0.24752	0.247254	0.387428	0.123066	0.307571	0.231927	0.18493	0.26586	0.307229	0.306003	0.262233	0.297952	0.22751	0.285318	0.22097	0.30641	0.270818	0.264699	0.166096	0.252598	0.278712	0.154706	0.225535
ASXL3	0.000603638	0.100662	0.0229448	-0.19867	0.143664	-0.0327172	0.0752411	-0.0612741	0.0181806	0.0577127	-0.0183402	0.081034	0.0051015	-0.0470556	0.116933	0.0452685	-0.00829034	0.0739461	0.0203661	0.061542	0.120672	0.154553	0.0101361	0.00314461	0.165691	0.157179	0.0849186	0.07027
ASZ1	-0.712459	-0.621868	-0.714464	-0.761462	-0.452414	-0.540303	-0.194618	-0.417919	-0.742382	-0.182613	-0.50773	-0.412049	-0.420063	-0.589834	-0.496564	-0.254168	-0.484581	-0.338835	-0.430637	-0.142809	-0.0282635	-0.169402	-0.34007	-0.121527	-0.209924	0.0275375	-0.133134	-0.152969
ATAD1	0.099889	0.410123	0.127555	0.163353	0.337682	0.198797	0.288891	0.0490374	0.449559	0.137199	0.340525	0.437307	0.0536734	0.0384899	0.210615	0.180166	-0.0179326	0.233384	0.394691	0.145655	0.0941777	0.138399	0.340868	0.118425	-0.0569292	0.145077	0.303203	0.329507
ATAD2	0.0735732	0.131183	0.0513197	0.0465204	0.0360736	-0.00621893	0.067329	0.0808935	0.100662	0.100565	0.105057	0.0360736	0.0957029	0.0856548	0.0772547	0.0648582	0.0513197	0.138479	0.183961	-0.00139239	0.136341	0.0377056	-0.061367	0.0675913	0.0767645	-0.00422464	-0.0778	-0.00150287
ATAD3A	0.411321	0.193743	0.0447162	0.0160116	0.232011	0.279839	0.061609	0.185445	0.344222	0.44291	0.353556	0.111252	0.399268	-0.200267	0.236405	0.10909	0.229357	0.104649	0.104951	0.12103	0.140942	0.237124	0.0217419	0.142326	0.201554	-0.0697379	0.11728	0.046152
ATAD3B	0.158116	0.0866317	-0.0859307	-0.0107795	0.162609	0.104427	0.0421252	-0.0261259	0.08046	0.0756349	0.130286	0.0669881	0.0213428	0.194976	0.216993	0.103557	0.0361414	0.0668155	0.157105	0.0793383	0.312688	0.160794	0.257096	0.102529	-0.142875	0.229177	0.0304676	-0.0601442
ATAD5	0.646949	1.50547	0.554676	1.39203	-0.0270112	0.13493	2.3706	-0.389027	0.360385	1.34521	1.91375	0.636372	0.92209	1.10166	0.762639	1.93527	0.442017	1.91375	2.10702	1.75036	1.35151	1.49799	1.36486	1.63958	1.59196	1.98215	1.98215	0.659146
ATAT1	0.304913	0.224015	0.331771	0.462597	0.465043	0.450764	0.282722	0.311292	0.271731	0.252174	0.414445	0.295555	0.294519	0.172103	0.432527	0.187299	0.10668	0.315024	0.21292	0.429046	0.225896	0.117159	0.377757	0.138285	0.231768	0.292686	0.142823	0.277484
ATCAY	-0.0146654	0.119334	-0.0897304	-0.166451	-0.0238298	-0.198288	-0.321163	-0.0474564	-0.185929	0.130817	-0.16242	-0.474325	-0.193875	-0.443851	-0.0210292	-0.175525	-0.507944	-0.857434	-0.259153	-0.120769	-0.00278847	0.046266	-0.00715238	0.0638008	0.0321395	0.0480259	0.132441	-0.0359729
ATE1	0.297952	0.160275	0.315943	0.285391	0.14645	0.295027	0.315024	0.316947	0.407177	0.393329	0.322204	0.306304	0.476566	0.456368	0.249063	0.375411	0.43277	0.24513	0.158641	0.319783	0.171324	0.464568	0.310556	0.217648	0.465043	0.347709	0.388816	0.297336
ATF1	-0.167587	-0.215498	-0.345553	-0.248287	0.00335144	-0.246957	-0.437567	-0.366732	-0.437394	-0.348268	-0.521209	-0.263353	-0.370986	-0.368862	-0.0852055	-0.114575	-0.0965489	-0.0191251	0.00119595	-0.0835555	-0.314238	-0.218875	-0.186414	-0.338835	-0.241208	-0.17593	-0.305514	-0.160852
ATF2	0.200713	0.137154	0.10345	0.21116	0.156387	0.277958	0.0421889	0.0425904	0.339118	0.352503	0.326265	0.192448	0.200998	0.144225	0.234118	0.0572316	0.238992	0.068624	0.150555	0.164908	0.225437	0.101218	0.254662	0.172236	0.127605	0.241472	0.244624	0.225016
ATF4	-1.27212	-0.873351	-1.15508	-1.27427	-1.57003	-1.35756	-0.203377	-1.43239	-1.41372	-1.58309	-0.835794	-1.32593	-1.23252	-1.42707	-1.02958	-1.57706	-1.49202	-1.5795	-1.24935	-1.57326	-1.20973	-1.44559	-1.40104	-1.46521	-1.50005	-1.22342	-1.47522	-1.2504
ATF5	0.677777	0.710981	0.739151	0.391524	1.06526	1.40681	0.702565	0.801807	0.899448	0.88743	0.648946	0.974229	1.01258	0.995618	0.578787	0.827693	0.626102	0.659792	0.791192	0.699858	0.835801	0.44583	0.791192	0.367662	0.444194	0.580636	0.204834	0.199249
ATF6	0.0315944	-0.201744	-0.318015	-0.128345	-0.0221593	-0.118351	-0.120252	-0.0576601	-0.0505129	-0.129956	-0.110829	-0.150608	-0.0485186	-0.0972993	-0.053513	-0.19834	-0.166859	-0.0376866	-0.232285	-0.188715	-0.210537	-0.143867	-0.228147	-0.276168	-0.25889	-0.164697	-0.178222	-0.170751
ATF7	-0.0519822	-0.0448811	-0.00775402	-0.0596814	0.043495	-0.0246916	-0.0685944	-0.0213766	-0.0461392	-0.189056	-0.208261	-0.0836826	-0.0724998	-0.094491	-0.0496905	-0.17954	-0.223085	-0.20096	-0.215885	-0.0688108	-0.0126072	-0.168061	-0.0648073	0.0788235	-0.119889	-0.173141	-0.0191251	-0.0513248
ATF7IP	-0.234595	-0.158535	-0.0973965	-0.010284	-0.18749	-0.0347897	-0.103588	-0.229162	-0.111463	-0.0181397	-0.167763	-0.101256	0.0332371	-0.0634776	-0.0848347	-0.0459836	-0.182693	-0.222935	-0.284868	-0.279256	0.0960425	-0.0848347	0.033645	-0.00605545	0.0295417	-0.103484	-0.0320115	-0.0525012
ATF7IP2	-0.674129	-0.178376	-0.527332	-0.166859	-0.420063	-0.638047	-0.274968	-0.469913	-0.164467	-0.397045	-0.391212	-0.253369	-0.41331	-0.539424	-0.542574	-0.535999	-0.429521	-0.435507	-0.544783	-0.779913	-0.440729	-0.279256	-0.368175	-0.134565	-0.295864	-0.219314	-0.139644	-0.392963
ATG10	-0.202531	-0.248803	-0.278903	-0.205485	-0.00856128	-0.167318	-0.217071	-0.362727	-0.0855687	-0.0811623	-0.191388	-0.217255	-0.479682	0.0230878	-0.161723	-0.218773	-0.299545	-0.170947	-0.0391371	-0.0477666	-0.244012	-0.0712092	-0.183459	-0.00298488	-0.281657	-0.337936	-0.104779	-0.248803
ATG101	-0.131919	-0.0588841	-0.165374	-0.0782711	-0.221898	-0.0640359	-0.0134238	-0.187047	0.0148632	0.0728492	-0.0965489	-0.223708	0.0985799	0.0269141	-0.0620675	-0.148569	-0.016104	-0.0115295	-0.0660441	-0.283847	-0.0285339	-0.0436305	-0.00928483	-0.1111	-0.044387	0.0490374	-0.0797695	-0.141675
ATG12	-0.398564	-0.449898	-0.324381	-0.48096	-0.294954	-0.428067	-0.551396	-0.317575	-0.519799	-0.473334	-0.600723	-0.323878	-0.515256	-0.277779	-0.41265	-0.524485	-0.617508	-0.392485	-0.453238	-0.471474	-0.506251	-0.421177	-0.463448	-0.436341	-0.314489	-0.531586	-0.547089	-0.672001
ATG13	0.377623	0.236405	0.245272	0.230032	0.219596	0.197942	0.385404	0.329737	0.16373	0.221783	0.387428	0.264871	0.319482	0.361515	0.451758	0.5136	0.550158	0.464347	0.700398	0.670214	0.429787	0.394519	0.730553	0.618012	0.502867	0.470367	0.296533	0.365761
ATG14	-0.0553763	-0.205398	-0.0664231	0.0428692	-0.0587491	-0.0409044	0.145815	-0.249791	-0.0197443	0.0346722	0.22575	0.0569433	0.0378852	0.100901	0.115897	0.108307	0.206932	0.0486578	0.0569433	0.103706	0.067329	0.0131931	0.138138	0.207402	0.241252	0.243237	0.0378852	0.17392
ATG16L1	-0.000188308	-0.094491	-0.13753	-0.271838	-0.166737	-0.0661691	-0.190095	-0.257238	-0.0224261	-0.0314203	-0.0232972	-0.0479622	-0.206395	0.200432	0.0394895	-0.118925	0.142882	0.204221	0.187299	0.0719362	-0.0317992	0.0517466	-0.155029	-0.149395	0.110826	0.166776	-0.0264263	-0.133134
ATG16L2	-0.00687924	-0.18723	-0.150748	-0.187889	0.0222685	-0.0727565	-0.135813	-0.241512	-0.0857107	0.00642939	-0.0240227	0.0295881	-0.0826406	0.15676	-0.045524	0.0608907	0.105115	0.110015	0.133609	0.0713495	-0.0132952	0.0593552	0.00912169	0.0665237	0.0894122	0.0700572	-0.170751	-0.0948376
ATG2A	-0.40854	-0.445628	-0.397176	-0.370459	-0.418354	-0.477636	-0.314103	-0.393878	-0.369939	-0.422805	-0.219056	-0.487317	-0.457416	-0.614863	-0.625472	-0.727587	-0.469431	-0.680512	-0.499548	-0.536729	-0.581577	-0.924255	-0.547477	-0.339726	-0.929194	-0.556603	-0.695968	0.22288
ATG2B	-0.0966867	-0.111717	-0.0249204	-0.056366	-0.0845377	0.0568733	-0.0088076	0.0773689	0.0431147	-0.0466744	-0.0509861	-0.102914	0.0279886	-0.0302761	0.0817929	-0.172375	-0.0310296	-0.040733	0.0568078	-0.0702202	0.0733107	-0.0861756	-0.0833096	-0.0961692	0.0788695	-0.0161665	0.0439338	0.0107437
ATG3	-1.06923	-1.08182	-0.991499	-0.89327	-1.39959	-1.173	-0.788918	-1.48822	-0.802212	-0.84075	-0.762131	-0.769402	-1.12614	-1.10589	-1.33621	-0.938975	-1.40332	-0.99594	-1.22267	-1.10153	-1.17991	-1.55682	-1.27564	-0.908143	-1.3069	-1.34106	-1.18592	-1.05114
ATG4A	0.483527	0.340641	0.744082	0.55908	0.624959	0.581418	0.486986	0.645529	0.331771	0.347434	0.362759	0.292795	0.263606	0.427977	0.203306	0.483304	0.356426	0.207905	0.383907	0.581125	0.504796	0.282013	0.250171	0.22258	0.411841	0.37197	0.166427	0.31925
ATG4B	0.129906	0.215403	0.272135	0.283011	0.272335	0.187523	0.295347	0.178878	0.309833	0.309047	0.409094	0.269507	0.224882	-0.0606016	0.129691	0.00329178	0.0980477	0.116933	0.0412377	-0.0163974	0.105391	0.238839	0.225823	0.0371035	0.0997893	0.213535	0.148001	0.222434
ATG4C	0.0834462	-0.313881	-0.359383	-0.537943	-0.216057	-0.224635	-0.329518	-0.23738	-0.375246	-0.372042	-0.37284	-0.288481	-0.107527	-0.596205	-0.173076	-0.0460729	-0.0557084	-0.178708	-0.308894	0.219069	-0.400921	0.0877657	-0.0801077	-0.347139	0.155989	-0.159522	-0.0764672	0.186048
ATG4D	0.0679245	-0.154671	0.25394	0.111027	0.436855	0.248791	0.116758	-0.00687924	0.2894	0.133203	0.14453	0.0566698	0.0738125	0.0490374	-0.0567726	-0.0452705	0.0867913	-0.114843	0.06175	0.250171	-0.124156	0.0153672	0.137425	0.00891434	-0.145199	-0.247961	0.108174	0.0787844
ATG5	-0.788513	-0.809537	-0.669352	-0.74069	-0.734615	-0.681845	-0.753675	-0.677128	-0.749646	-0.902297	-0.995414	-0.960623	-0.924713	-0.775648	-0.972434	-1.02385	-1.00853	-1.14297	-1.181	-0.957149	-0.850528	-0.973401	-0.833997	-0.85471	-0.997865	-1.01704	-1.04279	-0.992003
ATG9A	-0.142506	0.0568078	0.146146	0.647579	0.298686	0.403025	0.0693595	0.209823	0.268872	0.290357	0.237039	-0.161537	0.382579	0.101394	-0.00687924	-0.044593	0.1391	-0.0764672	0.372687	-0.0147899	-0.0818177	0.0609606	0.255582	0.258155	0.352854	0.0519655	0.0853798	0.183468
ATIC	-1.74246	-1.04905	-1.0012	-1.28472	-1.26374	-1.00236	-0.952369	-1.63084	-1.09499	-1.3724	-1.20165	-1.11965	-1.15815	-1.48075	-1.40901	-1.07853	-1.79834	-1.33506	-1.45358	-1.2708	-0.841083	-1.02197	-1.11521	-1.49202	-1.01898	-0.962176	-0.890227	-1.06708
ATL1	-0.70976	-0.501024	-0.477946	-0.764592	-0.698962	-1.56295	-0.59921	-0.46763	-0.669352	-0.638971	-0.871646	-1.03235	-0.86503	-0.788918	-0.731211	-0.371345	-0.095969	-0.135813	-0.353203	-0.766674	-0.365568	-0.20593	-0.586214	-0.759781	-0.33203	-0.369939	-0.641296	-0.383635
ATL2	-0.469143	-0.421484	-0.543601	-0.623259	-0.416811	-0.446881	-0.608531	-0.651102	-0.730895	-0.468775	-0.409625	-0.655908	-0.64701	-0.645019	-0.497564	-0.340834	-0.814894	-0.57795	-0.463652	-0.439791	-0.653373	-0.642228	-0.254242	-0.511425	-0.558046	-0.1783	-0.165758	-0.179774
ATL3	-0.97643	-0.783893	-0.701729	-0.957149	-0.927842	-1.15418	-0.767997	-1.05833	-1.14189	-0.800913	-0.910005	-0.94012	-0.978382	-1.18592	-1.11297	-0.953895	-1.28472	-1.21444	-0.814894	-0.961269	-0.851816	-1.12775	-1.085	-1.17878	-1.07935	-1.13395	-0.967613	-0.773239
ATM	-1.02385	-1.08849	-1.23252	-1.38611	-1.2646	-1.3069	-1.33085	-1.15902	-0.980837	-1.09012	-1.24414	-1.12856	-1.07776	-0.82393	-0.983282	-1.39488	-1.20165	-0.957753	-1.03988	-1.26265	-1.22586	-0.89491	-1.11135	-1.16065	-0.910005	-0.961269	-1.00236	-1.10502
ATMIN	-0.855865	-0.708739	-0.627051	-0.889757	-0.85378	-0.773239	-0.784289	-0.70693	-0.704445	-0.964666	-0.489524	-0.747551	-0.576522	-0.490313	-0.30172	-0.691116	-0.612128	-0.611921	-0.662402	-0.618842	-0.60784	-0.471824	-0.630469	-0.188463	-0.640095	-0.438128	-0.587944	-0.406553
ATOH7	-0.282556	-0.404237	-0.387258	-0.285068	-0.188715	-0.17954	-0.241413	-0.26526	-0.391448	-0.189904	-0.390021	-0.20779	-0.487165	-0.31581	-0.0600068	-0.236773	0.0435766	-0.192554	-0.377526	-0.161786	-0.132711	-0.32654	-0.0236802	-0.233739	-0.202154	-0.0328853	-0.0422953	-0.129603
ATOH8	0.207717	0.0975811	0.280392	0.165039	0.226029	0.0817929	0.0650351	0.19981	0.119686	-0.204172	0.134713	0.0306014	0.177152	0.0275991	0.157572	0.565565	0.260891	0.279544	0.0318012	0.204703	-0.180655	-0.0182765	-0.0898694	-0.0545319	-0.228798	-0.00698865	-0.0311565	0.038742
ATOX1	-0.156603	-0.281208	-0.209547	-0.112533	0.0424221	-0.352221	-0.253713	-0.26744	-0.178461	-0.396567	-0.39987	-0.289203	-0.279386	-0.359256	-0.245233	-0.0778	-0.116888	-0.308894	-0.0623123	-0.215417	-0.238449	-0.255654	-0.424256	-0.0784679	-0.333662	-0.423768	-0.548902	-0.0147899
ATP10A	0.0845313	0.268872	0.152062	0.116705	0.101951	0.133948	0.0925845	0.0611505	0.210244	0.193476	0.241405	0.23269	0.190002	0.155989	0.179169	0.0521487	0.0160856	-0.0222731	0.058066	-0.0966867	0.0981068	0.255082	0.0912775	0.258642	-0.0155832	-0.0210292	0.230032	0.112724
ATP10D	0.379431	0.182236	0.017523	0.142135	0.230032	0.185757	0.468693	0.534376	0.454833	-0.197057	0.106241	0.039988	0.0451646	0.316711	0.163278	0.177001	0.261133	0.331067	0.237039	0.115343	0.161072	0.10476	0.170093	-0.0485186	0.055782	-0.152227	0.0262301	0.188393
ATP11A	-0.599414	-0.194688	-0.387001	-0.47934	-0.699535	-0.582425	-0.49837	-0.645773	-0.446594	-0.373675	-0.59772	-0.413469	-0.0463803	-0.781077	-0.749646	-0.473527	-0.423768	-0.458344	-0.407375	-0.643045	-0.491328	-0.398728	-0.522652	-0.821024	-0.359697	-0.354129	-0.294567	-0.201285
ATP11A-AS1	-0.438901	-0.585372	-0.464624	-0.480519	-0.457745	-0.394163	-0.563918	-0.322952	-0.227979	-0.234326	-0.489674	-0.63094	-0.478768	-0.367586	-0.373338	-0.299107	-0.178222	-0.519327	-0.514274	-0.495558	-0.570723	-0.466535	-0.49837	-0.252783	-0.557645	-0.302681	-0.465434	-0.423417
ATP11AUN	-0.891192	-1.06381	-1.2037	-1.11076	-1.13326	-0.883228	-1.173	-0.926406	-0.869011	-0.884802	-0.942045	-0.97583	-0.9213	-0.609689	-0.852989	-0.998554	-0.783893	-0.629008	-0.925308	-0.942045	-1.07207	-0.843992	-1.09718	-1.27564	-1.07298	-1.17991	-1.36066	-1.2462
ATP11B	-0.354016	-0.424808	-0.432401	-0.44893	-0.46085	-0.360809	-0.312831	-0.394042	-0.415091	-0.448079	-0.472581	-0.477095	-0.487581	-0.349874	-0.37284	-0.361448	-0.322601	-0.316444	-0.293244	-0.320633	-0.381024	-0.383059	-0.270051	-0.257238	-0.255017	-0.377526	-0.318632	-0.243794
ATP12A	0.360947	0.35629	0.450255	0.396971	0.209966	0.21842	0.397926	0.0890201	0.500676	0.488064	0.464568	0.219862	0.321853	-0.219056	0.462959	0.238592	0.338866	0.288677	0.33862	-0.174112	0.336784	0.56375	-0.0638845	0.240154	0.377458	0.247894	0.341647	0.279839
ATP13A1	-0.257047	-0.033072	-0.0183402	-0.0982711	-0.278302	0.0749853	0.241888	-0.244099	-0.0932925	-0.0862871	-0.109196	-0.0782711	-0.160062	-0.015108	0.0568078	0.150187	0.164908	0.0109949	-0.0243062	-0.295864	0.0797302	-0.0213322	0.100851	0.0468294	-0.0836826	-0.164781	-0.167254	-0.364808
ATP13A2	0.403803	0.0509541	0.399268	0.131006	0.206527	0.307902	-0.0200031	-0.00669244	0.348129	-0.0591493	0.274853	0.12207	0.18354	0.257795	0.0108866	0.0771863	0.123182	-0.0728236	0.147749	0.105331	0.396097	0.0141797	0.184022	0.16222	0.140942	0.0929096	0.249198	0.146089
ATP13A3	-1.02025	0.548245	-0.650284	-0.214728	-0.953434	-0.64776	0.841984	-0.430806	-0.951722	0.157242	0.362898	-0.767997	-0.693515	-0.499078	-0.376959	-0.230759	-0.697244	-0.304057	0.611464	-0.46763	-0.038958	0.442683	1.1074	-0.261229	-0.111876	-0.176282	0.146673	0.449123
ATP13A4	0.0740192	0.0850082	0.111967	0.0212895	0.109777	0.106063	0.165039	0.188044	0.151835	0.151418	0.224653	0.165566	0.132309	0.0804106	-0.0046743	0.0556478	0.159176	0.154873	0.127284	0.147237	0.0137822	0.0281423	0.0664589	-0.0146085	-0.0652577	-0.117659	0.0715899	0.0297749
ATP1A1	0.0621422	-0.162336	-0.00935423	0.0465669	0.0117894	-0.206466	-0.19842	-0.122531	0.0130678	-0.318376	0.0254499	-0.169463	-0.127525	-0.0165434	0.0904034	-0.183155	0.117089	-0.0422953	-0.124663	-0.309113	-0.000396373	-0.120396	-0.063362	-0.278715	-0.0800209	0.144289	0.0300977	0.108744
ATP1A2	0.655833	0.78792	0.763727	0.536722	0.613491	0.537528	0.62223	0.558664	0.595098	0.544231	0.744082	0.684538	0.564629	0.479179	0.52669	0.496897	0.41304	0.439256	0.509163	0.407177	0.483527	0.486493	0.66594	0.466528	0.463427	0.457969	0.455861	0.529759
ATP1A3	-0.114232	-0.0174992	-0.0471868	-0.0732976	-0.0405477	-0.183459	-0.125036	0.0132404	-0.194688	-0.281657	-0.216231	-0.474653	-0.578785	-0.116659	-0.476572	-0.456728	-0.392219	-0.660741	-0.327411	-0.244857	-0.191914	-0.501938	-0.0666153	-0.18003	-0.128265	-0.37009	-0.3771	-0.19834
ATP1A4	0.384243	0.0982193	0.371639	0.29493	0.204703	0.317922	0.393187	0.344686	0.392906	0.400563	0.312688	0.477961	0.377046	0.512667	0.395737	0.255838	0.28611	0.443454	0.472393	0.351598	0.266086	0.359096	0.452641	0.267035	0.31925	0.414624	0.636964	0.282013
ATP1B1	0.0020597	0.0599604	0.0687304	0.0520356	0.130715	0.0964866	0.0913969	0.0647409	0.14033	0.0704693	0.171858	0.171236	0.09222	0.202266	0.212665	0.144163	0.344101	0.163603	0.249981	0.0920668	0.33947	0.166935	0.294519	0.0942413	0.19223	0.0751296	0.195068	0.42028
ATP1B2	-1.16955	-1.40104	-1.2708	-1.35181	-1.34387	-1.22342	-1.45112	-1.13691	-1.01571	-1.18689	-1.20562	-1.17711	-1.19977	-0.806945	-1.10659	-1.48822	-1.11135	-1.26265	-1.46337	-1.50541	-1.33506	-1.04905	-1.23576	-1.38611	-1.23679	-1.37362	-1.25423	-1.08591
ATP1B3	-1.75324	-0.773239	-1.48822	-1.50005	-1.64381	-1.82226	-1.30551	-1.66361	-1.94339	-1.55682	-1.91241	-1.85381	-1.60781	-1.61685	-1.78803	-1.85669	-2.06711	-1.86215	-1.79834	-1.96908	-1.88389	-1.85669	-1.98978	-2.21518	-1.89325	-2.0105	-1.97607	-1.89325
ATP1B4	0.277858	0.235375	0.206871	0.213148	0.377757	0.233901	0.085136	0.355367	0.125446	0.0846459	0.158314	0.253027	0.187571	0.0932178	0.227658	0.137953	-0.189815	0.0871462	0.084594	-0.111876	0.044807	0.0979972	-0.0903772	-0.164697	0.310556	0.228896	-0.012234	0.0410409
ATP23	-0.248217	-0.383441	-0.305014	-0.389712	-0.333418	-0.258495	-0.386821	-0.232478	-0.206311	-0.251334	-0.3634	-0.200862	-0.368391	-0.224635	-0.333933	-0.516202	-0.555595	-0.51199	-0.425252	-0.482121	-0.61961	-0.436141	-0.560501	-0.516202	-0.614863	-0.667578	-0.600188	-0.696326
ATP2A1	0.249774	0.0567506	0.290357	0.18811	0.356166	0.26727	0.192806	0.14645	0.157637	0.0520356	-0.0316366	-0.0867908	-0.0198098	0.0937638	-0.121326	-0.0624393	0.0448457	-0.0469828	0.216595	0.0965591	0.0993152	0.106815	0.159952	-0.055024	0.00706025	-0.0190746	0.0725214	0.177341
ATP2A2	3.4722	4.88423	4.88423	3.28921	3.71023	3.82313	2.46985	4.54825	3.82313	3.82313	3.18024	4.06155	3.96572	4.06155	4.39109	3.71023	4.22702	3.82313	3.55656	3.82313	3.96572	3.82313	4.06155	3.22555	4.06155	2.3706	2.75233	3.82313
ATP2A3	0.874943	1.22384	1.02523	0.834287	0.751103	1.204	1.03888	0.979411	0.742641	1.35887	0.740316	1.23282	0.963594	0.981596	1.12147	1.17658	1.00815	1.11158	0.918805	0.93043	1.08097	1.05908	1.11158	0.726559	1.00205	0.884227	0.693757	0.715703
ATP2B1	-0.0314203	0.0366455	0.0764815	-0.0973965	0.0964866	-0.115853	-0.0229056	-0.0567726	0.110961	-0.118286	0.00451685	0.135573	-0.00856128	-0.11557	0.0558308	-0.144036	0.0191972	0.0151213	0.165162	0.0162535	0.00669674	-0.025852	0.0754804	0.0325395	-0.287547	0.132932	-0.0261605	-0.0121848
ATP2B2	-0.381684	-0.338391	-0.265345	-0.387733	-0.258083	-0.220543	-0.397539	-0.423261	-0.605354	-0.399112	-0.446178	-0.32305	-0.568184	-0.217563	-0.196533	-0.528904	-0.316819	-0.42246	-0.269255	-0.258196	-0.512426	-0.290132	-0.438274	-0.448079	-0.478463	-0.522186	-0.472182	-0.483091
ATP2B3	0.276586	0.334087	0.21292	0.245533	0.165952	0.286717	0.325733	0.372119	0.266855	0.283639	0.180435	0.34647	0.353556	0.226758	0.33996	0.335534	0.280504	0.276497	0.225368	0.175271	0.228806	0.282222	0.223035	0.337682	0.136268	0.280504	0.210443	0.193476
ATP2C2	-0.0415928	0.0778503	-0.0241184	-0.120923	-0.0762469	0.0209035	0.157291	0.0297091	0.214679	0.052692	0.077787	0.051619	0.200713	0.0988943	0.288795	0.0555178	0.337559	0.170216	0.321356	0.144041	0.0760878	0.0241254	-0.118575	-0.221216	0.319783	0.309047	0.248699	0.0459894
ATP4B	-0.0443322	0.0681513	0.0334578	0.0760878	0.0383721	-0.0240671	-0.122944	-0.0598389	-0.0254722	-0.33505	0.0933352	-0.069393	-0.223388	-0.0451561	0.0355128	-0.114927	-0.087417	-0.0280824	0.0360133	-0.0309492	-0.15681	-0.0495768	0.00223956	0.204634	-0.138504	-0.143448	0.0791534	-0.422134
ATP5A1	0.908469	0.267348	0.68771	0.573312	0.278607	0.88554	0.221434	0.616902	1.18084	0.661314	1.14824	1.07126	1.63958	1.20175	1.59196	1.84977	1.59196	2.058	1.72337	1.84977	1.40681	1.43509	1.66727	1.78779	1.52765	1.4701	1.44277	1.18084
ATP5C1	-0.106539	-0.121811	-0.221494	0.00956181	-0.142271	-0.177359	-0.0802982	-0.203697	-0.0926782	-0.309113	0.045709	-0.134874	-0.112533	-0.288376	-0.124238	0.123004	0.00712609	0.0152414	-0.217456	-0.0775068	-0.277582	-0.0946407	-0.014361	0.0594268	-0.0259481	0.0989555	0.0730299	-0.199452
ATP5F1	-0.0712672	-0.111521	0.105639	0.118814	-0.118488	-0.0148406	-0.216291	-0.285068	0.0572733	-0.0769694	0.186679	0.0287218	0.160794	-0.171304	-0.00500874	0.474832	0.275497	0.367662	0.403025	0.441274	0.150306	0.141062	0.259232	0.518682	0.0738125	0.284771	0.229975	0.168862
ATP5G3	-0.175264	-0.362727	-0.0785922	-0.274243	-0.238308	-0.133202	-0.363981	-0.0971037	-0.209466	-0.248217	0.00706025	-0.29466	-0.176	-0.110417	-0.106539	0.0559855	-0.0899318	-0.0718608	-0.187942	-0.0105638	-0.0809775	-0.104072	0.0437278	-0.142434	-0.0145439	-0.200175	-0.206046	-0.0765987
ATP5J	0.929152	0.870337	1.02148	0.94251	0.832865	0.889323	0.433619	0.786925	0.896431	0.76499	1.02764	0.875899	1.32333	0.630117	1.00815	1.1988	1.22384	1.08097	1.1074	1.22384	0.868747	1.0196	1.06757	1.12862	1.05908	1.07126	0.952158	0.877075
ATP5L	-0.041463	0.174654	0.140157	-0.042724	-0.129509	0.0439915	-0.0839215	0.120547	0.34647	0.147498	0.288497	0.234205	0.271547	-0.0656889	0.297336	0.394691	0.421036	0.462116	0.419886	0.396971	0.307659	0.273733	0.486715	0.674411	0.119817	0.392421	0.39672	0.61606
ATP5S	0.174726	0.287714	0.301322	0.290949	0.322414	0.00106009	0.0505288	-0.105472	0.356814	0.177742	0.0800271	0.0980477	-0.0450768	0.129832	0.0878307	0.0361414	0.116283	0.376124	0.225301	0.202355	0.0373638	0.115393	0.237307	0.285154	-0.111949	0.0743327	0.103512	0.0504168
ATP5SL	1.02325	0.665273	0.64143	0.971031	0.642661	0.945715	0.472607	0.269673	0.813357	0.857225	0.981596	0.571746	0.742641	0.22114	0.668332	0.773729	0.9619	0.812461	0.789671	0.657955	1.11444	0.807593	1.00815	0.947932	0.96917	0.96539	1.06526	0.69521
ATP6AP1L	-0.0437265	0.07027	0.0349114	-0.141274	0.115732	0.0482898	-0.0402819	0.179032	0.0434407	-0.100999	-0.000294411	-0.0434965	0.0418268	-0.134141	0.158871	-0.0443322	0.104265	0.0624241	0.118371	0.0981068	0.11357	-0.112947	0.0297749	-0.00735579	0.0590546	0.190413	0.0422468	-0.119641
ATP6AP2	-0.450557	-0.70152	-0.932691	-0.501605	-0.93386	-0.785843	-0.706091	-0.722074	-0.873798	-0.779575	-0.952369	-0.764592	-0.5886	-0.792873	-0.869483	-0.459646	-0.162008	-0.232478	-0.339182	-0.540303	-0.462102	-0.637235	-0.210182	-0.338739	-0.639514	-0.539841	-0.241115	-0.361356
ATP6V0A1	-0.549577	-0.295262	-0.120769	0.190132	-0.0890672	-0.308091	-0.044593	0.00733906	-0.264734	-0.55391	0.0644089	-0.437689	-0.444917	-0.568184	-0.474653	-0.287661	-0.118663	-0.233936	-0.0282635	-0.157898	-0.286803	-0.372968	-0.511067	-0.180655	-0.424093	-0.203011	-0.0731351	-0.258294
ATP6V0A2	-0.211621	0.238029	-0.0459836	0.0623639	0.302782	0.0855829	-0.0785922	-0.0113042	-0.083454	-0.0280116	-0.00873828	-0.023583	0.0663847	-0.321515	-0.381581	-0.321966	0.0628947	0.377757	-0.0400804	-0.204479	-0.142147	-0.0993945	-0.0793482	-0.168482	-0.16217	0.0492577	0.0281423	0.0649795
ATP6V0A4	-0.0224261	0.137371	0.0114759	0.346025	0.231312	-0.0717495	0.0550535	0.0247163	0.0292586	0.143476	0.0700572	-0.0714741	0.147749	-0.372042	0.36324	0.345067	-0.0934284	0.307365	0.141648	-0.161537	0.161408	-0.0779785	0.0802516	0.0115276	-0.226971	0.322294	-0.0429623	0.0634052
ATP6V0C	-0.133777	0.141815	-0.167392	0.226459	-0.21309	0.164056	0.348129	0.0459308	0.0419326	0.0545295	0.552873	0.129495	0.149573	-0.129043	-0.0241895	0.21116	-0.179388	-0.0370795	-0.177197	0.110256	-0.406835	0.153803	0.0315944	-0.0399204	0.0497594	0.0222052	0.130875	-0.221043
ATP6V0D2	-0.613104	-0.896721	-0.816175	-1.16877	-1.00988	-0.85471	-1.16955	-1.07935	-0.86503	-1.05833	-1.3724	-0.978829	-1.16254	-0.863746	-1.23972	-1.06993	-1.23154	-1.29083	-1.23154	-1.3489	-1.01303	-1.02618	-1.08666	-0.871141	-1.00853	-1.06381	-1.07049	-1.20973
ATP6V0E1	-0.122531	-0.015108	-0.0896783	0.0425384	-0.0152473	-0.0190746	0.107585	-0.015312	-0.090192	0.1387	0.0275375	-0.133837	0.109563	-0.167318	0.0181243	-0.109286	0.139804	0.017356	0.0713495	-0.115487	0.080334	0.0299288	0.177483	0.0326051	0.0104865	-0.0393257	0.00314461	0.249981
ATP6V1A	0.104265	0.132628	0.100115	0.154927	0.0371825	0.323863	0.360516	0.135073	0.139868	0.145375	-0.0979607	0.246362	0.21116	0.357529	0.110395	0.135147	0.296136	0.148464	0.236707	-0.0497815	0.216735	0.125255	0.108511	0.0763715	0.193686	0.239581	0.126543	0.137706
ATP6V1B1	-0.170817	0.0152414	0.110562	0.0631629	0.208419	0.200998	0.186679	0.259605	-0.020825	0.188266	0.285244	0.170093	0.120267	0.298599	0.321356	0.333193	0.243805	0.283377	0.170433	0.30427	0.366874	0.517385	0.380388	0.339861	0.263076	0.521107	0.0945762	0.209966
ATP6V1B2	-0.860017	-0.504002	-0.318632	-0.335175	-0.799423	-0.559217	-0.223258	-0.440914	-0.767665	-0.0267199	-0.765821	-0.714215	-0.697861	-0.627051	-0.495925	-0.038958	-0.362727	-0.102914	0.152397	-0.291628	-0.322952	-0.310057	-0.118879	-0.128265	-0.219742	-0.0822306	0.195943	-0.206395
ATP6V1D	0.158641	-0.0790691	-0.196946	0.276788	-0.361573	-0.0400804	-0.0159772	-0.068125	0.119747	-0.0157848	0.419474	0.249453	0.427183	0.284955	0.470808	0.692436	0.810131	0.890749	0.745496	0.76499	0.783536	0.706064	0.891811	0.724955	0.801807	0.786925	0.599281	1.01012
ATP6V1E1	0.157242	-0.0801077	0.0236114	0.295027	-0.140229	0.149308	0.355249	0.392716	0.364487	0.217746	0.415661	0.218125	0.480979	0.395737	0.61606	0.811322	0.476967	0.645529	0.698457	0.606693	0.873495	0.862853	0.956225	1.00592	1.00815	1.05067	0.745496	0.628301
ATP6V1F	-0.174281	0.0963621	0.0165667	0.0349707	-0.167318	0.159399	0.708487	-0.08586	0.114225	0.0873645	0.121111	-0.250353	-0.0292943	-0.0140608	0.0229448	0.261314	-0.0317992	0.122832	0.2579	0.0315424	-0.147847	-0.222846	0.0154224	0.0563865	-0.0726117	-0.188362	-0.00798091	-0.0302034
ATP6V1G1	-0.188981	-0.0590057	-0.0791539	-0.137599	-0.190095	-0.105215	-0.287547	-0.393177	-0.145293	-0.210956	-0.212592	-0.249791	-0.0330009	-0.336599	-0.314934	-0.180309	-0.150454	-0.360147	-0.414134	-0.686006	-0.144279	-0.350545	-0.10742	-0.327847	-0.120625	-0.247518	-0.151078	-0.321163
ATP6V1G3	0.193567	0.0997893	0.267348	0.261133	0.402318	0.266007	0.107903	0.249625	0.0515133	-0.0342083	0.151915	0.159115	0.0671096	0.160351	0.166361	0.207972	-0.165151	-0.00226165	0.159711	0.0513197	0.0321395	0.0512576	-0.000396373	0.26344	-0.0817641	-0.00506597	0.259062	-0.204671
ATP6V1H	-0.357583	-0.685147	-0.58196	-0.27838	-0.593323	-0.447543	-0.688092	-0.433803	-0.265854	-0.413955	-0.299545	-0.326859	-0.0979048	-0.361448	-0.401477	-0.00616628	0.0976907	-0.0825762	-0.104121	-0.0399779	-0.0567726	-0.18714	-0.0697379	0.0271566	0.0118733	-0.21309	-0.346008	0.256102
ATP7A	-0.353203	-0.358096	-0.36302	-0.570302	-0.284759	-0.390132	-0.405436	-0.342109	-0.36644	-0.366196	-0.416979	-0.28576	-0.297957	-0.406278	-0.356665	-0.500658	-0.467447	-0.32025	-0.404397	-0.441205	-0.17052	-0.208683	-0.198205	-0.398217	-0.244382	-0.281856	-0.116466	-0.17561
ATP7B	0.335534	0.128707	0.193179	-0.00369035	0.267778	0.255403	0.409906	0.255403	0.179032	0.195853	0.296533	0.156825	0.206598	0.259232	0.175705	0.217281	0.132237	0.346025	0.150691	0.00319944	0.0950431	0.199911	0.147367	0.252931	0.179169	0.147627	0.142661	0.124125
ATP8A1	-0.0739571	0.0429393	-0.0546404	-0.0923995	0.00570595	-0.00416539	-0.10742	-0.052615	-0.210078	-0.000141871	-0.0724998	0.0419326	-0.130697	-0.0174281	-0.113341	-0.106539	-0.114927	0.0150277	-0.201744	-0.0821644	-0.100295	-0.0216768	-0.148663	-0.100846	0.0827728	0.0106254	-0.124804	-0.171016
ATP8A2	-0.067457	-0.0582243	0.0150877	-0.218262	-0.0538849	-0.0237677	-0.0632809	-0.0540854	-0.057584	-0.0491988	0.0161969	0.00522726	-0.0947575	0.0430548	-0.0862276	-0.0413955	-0.0710686	-0.100786	-0.273526	-0.00403547	0.00161179	0.0972091	-0.191558	-0.163754	0.0434407	-0.0466056	-0.105971	-0.0413307
ATP8B1	-0.679053	-0.633009	-0.537377	-0.612904	-0.70039	-0.695403	-0.530392	-0.758801	-0.770672	-0.417919	-0.827065	-0.714738	-0.629832	-0.743701	-0.528274	-0.566936	-0.541089	-0.46329	-0.647518	-0.739907	-0.685752	-0.603375	-0.52706	-0.613857	-0.742382	-0.442695	-0.422805	-0.53713
ATP8B2	-0.0610726	0.0659794	-0.22834	-0.168061	-0.222085	-0.205655	-0.252895	-0.0896783	-0.220076	-0.170751	-0.473527	-0.470692	-0.326649	-0.20096	-0.0108351	-0.134648	-0.0318542	-0.124458	-0.0383644	-0.414551	-0.137178	0.21568	0.328655	0.131006	-0.198737	-0.200093	0.234788	0.126312
ATP8B3	0.0738125	-0.00569944	0.0669045	-0.0191888	0.312946	-0.0134809	0.1841	0.0515656	0.0964866	0.0215296	0.0206751	-0.151845	-0.110001	-0.275477	0.168249	0.0726052	0.00753055	0.0927454	0.282836	-0.0147195	0.0386751	0.103766	0.162558	0.0930247	0.0122363	-0.0930554	0.315943	-0.0365989
ATP8B4	0.134384	0.107585	0.151558	-4.05682e-05	0.0425904	0.0858978	0.0477854	0.22835	0.182455	-0.162652	0.144225	0.0378114	-0.0195024	-0.0588841	0.0734444	-0.112791	0.110606	-0.0047315	-0.107831	0.00183249	-0.00593249	0.0352548	0.0948683	-0.0149201	0.01336	-0.0545319	-0.0732976	0.00615772
ATP9A	0.241719	0.155884	0.365761	0.354971	0.220895	0.390956	0.142085	0.366625	0.0492577	0.176353	0.111765	0.176929	0.0936959	0.087689	0.0321395	0.195605	0.183885	0.245354	-0.0128261	0.0945762	0.195243	0.136978	0.283292	-0.0317992	0.233384	-0.0631988	-0.0369911	0.117593
ATP9B	0.208618	0.218743	0.163987	0.341408	0.181486	0.206376	0.269411	0.305855	0.172335	0.212853	0.165162	0.279629	0.248316	0.281819	0.291563	0.238992	0.0936489	0.220818	0.230359	0.252707	0.235455	0.275091	0.342773	0.12401	0.293234	0.355497	0.313482	0.277767
ATPIF1	-0.157987	-0.4943	-0.549861	-0.175026	-0.285957	-0.398862	-0.439791	-0.460133	-0.231547	-0.278715	-0.12105	0.0332371	-0.240171	-0.117162	-0.221658	-0.205655	-0.107677	-0.2501	-0.231972	0.0329087	-0.0866356	-0.255837	-0.202154	0.0130678	-0.121955	-0.0980987	-0.00129245	0.109639
ATR	-0.41265	-0.47914	-0.351746	-0.406553	-0.356919	-0.394808	-0.42883	-0.266108	-0.261448	-0.334035	-0.359799	-0.320126	-0.397351	-0.327204	-0.368989	-0.524848	-0.52844	-0.369659	-0.530672	-0.427407	-0.455294	-0.460965	-0.424679	-0.552737	-0.502151	-0.59001	-0.628679	-0.487581
ATRAID	-0.171507	-0.361573	-0.238449	-0.279087	-0.218262	-0.172769	-0.247808	0.0477854	-0.347712	-0.00251275	-0.239208	-0.270859	-0.348049	-0.296124	-0.301143	-0.179937	0.00516299	-0.220367	-0.106539	-0.128265	-0.404509	-0.110107	-0.337766	-0.295142	-0.365854	-0.321966	-0.134083	-0.321398
ATRIP	0.243928	0.49478	0.354971	0.717558	0.412492	0.520453	0.279629	0.512667	0.252849	0.354971	0.384397	0.309138	0.232099	0.165226	0.125255	0.147152	0.244889	0.389665	0.225016	0.0367042	0.110338	0.194087	0.183623	0.283292	0.116812	0.155559	0.349902	0.225896
ATRN	-0.233936	-0.265179	-0.180374	-0.365722	-0.452599	-0.151078	-0.400581	-0.672877	-0.450702	-0.152743	-0.213669	-0.383059	-0.123102	-0.150135	-0.201051	-0.246142	-0.268513	-0.0910861	0.0320225	-0.14173	-0.422683	-0.214004	-0.287547	-0.294765	-0.455294	-0.474833	-0.513984	-0.106737
ATRNL1	-0.0842484	-0.0229648	-0.134874	-0.0538393	0.0963621	-0.1512	-0.273355	-0.093007	-0.0675017	-0.00291136	-0.0675017	-0.0195866	0.281263	-0.074147	-0.194547	-0.0757473	0.0390749	-0.0381342	-0.220938	-0.0403383	-0.221138	0.00458654	-0.0992401	-0.0425227	0.00682637	0.0397001	-0.0410277	-0.226971
ATRX	-0.546526	-0.403657	-0.460965	-0.497007	-0.533987	-0.131997	-0.451188	-0.599789	-0.152462	-0.488166	-0.489993	-0.380886	-0.269972	-0.314103	-0.382411	-0.129881	-0.277526	-0.232677	-0.49876	-0.280191	-0.433523	-0.286906	-0.554722	-0.206311	-0.409485	-0.327932	-0.461645	-0.667075
ATXN1	-0.356012	-0.28096	-0.183155	-0.225333	-0.316819	-0.337766	-0.212416	-0.34069	-0.269338	-0.227696	-0.268834	-0.306299	-0.259535	-0.188463	-0.167479	-0.259153	-0.251675	-0.209008	-0.277264	-0.33013	-0.392092	-0.316043	-0.174026	-0.114651	-0.233936	-0.305832	-0.0789044	-0.0327172
ATXN10	-0.196224	-0.273526	-0.274507	-0.165374	-0.398862	-0.242214	-0.0639473	-0.253142	-0.119224	-0.218262	0.0016807	0.058281	0.00125493	0.04607	-0.0940308	-0.00867557	-0.102849	-0.0519068	-0.0373882	-0.0458705	-0.155872	0.0931495	-0.0533968	0.0339093	-0.0660441	0.00377051	0.149237	-0.0941592
ATXN2	-0.214176	-0.32906	-0.366333	-0.325857	-0.353916	-0.397351	-0.330716	-0.301823	-0.33996	-0.366333	-0.340834	-0.340357	-0.451909	-0.21734	-0.342957	-0.412049	-0.316444	-0.376828	-0.528071	-0.474325	-0.202804	-0.238881	-0.310443	-0.472385	-0.493822	-0.329375	-0.360582	-0.34448
ATXN2L	0.172728	0.141572	0.0809738	0.156043	0.258549	0.176017	-0.0501452	-0.0640359	0.0788235	-0.0726117	-0.18474	-0.00495844	0.107766	0.0619022	0.331246	0.0991899	0.0396611	0.148582	0.144041	0.105391	-0.216231	0.00527683	-0.0919249	0.0618415	0.0813391	0.138065	-0.0365394	0.0629665
ATXN3	-1.26869	-1.02452	-1.11445	-0.870692	-0.902772	-1.11789	-1.23044	-0.97048	-0.792506	-1.19126	-1.51249	-1.13829	-1.21732	-0.860483	-0.779913	-1.23461	-1.07425	-1.09885	-1.04825	-1.23044	-1.30953	-0.764592	-1.02084	-0.9861	-1.05472	-1.00782	-0.950614	-1.20067
ATXN3L	-0.280691	-0.245012	-0.164866	-0.111386	0.00297965	-0.012716	-0.0254126	0.0495746	-0.0130632	-0.0560851	-0.0830574	-0.0275569	-0.0500224	-0.0315351	0.0297749	-0.254752	0.0970426	-0.0100587	0.0117241	-0.165308	-0.0436732	0.000793665	-0.00669244	-0.33013	-0.0581465	-0.0717954	0.101285	-0.000141871
ATXN7	-0.210375	-0.177936	-0.324266	-0.202101	-0.152661	-0.215246	-0.12266	-0.318376	-0.227096	0.0013822	-0.169255	-0.318632	-0.278715	-0.0959197	-0.194474	-0.151285	-0.0946407	-0.0661051	-0.208683	-0.241413	-0.118879	-0.207432	-0.282063	-0.171087	-0.132305	-0.343705	-0.0492583	-0.184649
ATXN7L1	0.242931	0.317424	0.184991	0.281263	0.212366	0.20383	0.247638	0.295347	0.316947	0.173232	0.298282	0.327477	0.361746	0.225301	0.235521	0.198007	0.0835818	0.153731	0.164056	0.240793	0.190917	0.177927	0.246127	0.218027	0.297952	0.20142	0.0887287	0.285722
ATXN7L2	0.0302817	-0.0907569	-0.0113042	0.038742	0.0963162	-0.132865	-0.106128	-0.119224	0.0672601	0.00516299	-0.0249785	0.209249	0.149927	-0.0152473	0.0253081	-0.134799	0.00394139	-0.0844717	0.0307156	-0.00922868	-0.00318453	0.166096	0.0776473	0.175481	-0.00977757	-0.0349331	0.00956181	0.0355128
AUH	-0.283006	-0.336884	-0.250458	-0.294846	-0.287131	-0.171507	-0.283744	-0.216563	-0.131766	-0.248287	-0.252373	-0.19209	-0.113341	-0.0406629	-0.353687	-0.200719	-0.256029	-0.290586	-0.238881	-0.273962	-0.329518	-0.242141	-0.32654	-0.375656	-0.398324	-0.316819	-0.380131	-0.297572
AUNIP	-1.05833	-1.10352	-1.15731	-1.01774	-1.04279	-0.906884	-1.16344	-0.994211	-1.18764	-1.12674	-1.19126	-1.08849	-1.21542	-0.899881	-1.11019	-1.23576	-1.14104	-1.21929	-1.35906	-1.173	-1.32331	-1.27212	-1.35633	-1.40473	-1.2785	-1.33725	-1.59283	-1.32485
AURKAIP1	-0.142434	-0.264313	-0.153545	-0.103484	0.0206026	0.00161179	-0.15633	-0.0792893	-0.208469	-0.225706	-0.0317992	0.0106254	0.0134975	-0.126704	-0.184227	-0.101967	-0.141028	-0.130432	-0.111784	-0.0545319	0.0837692	-0.0481823	-0.00730094	0.347709	-0.169402	-0.0320521	-0.21559	0.00335144
AURKB	-0.0627922	-0.197169	0.193686	-0.0107011	0.118969	-0.0866356	-0.229643	-0.151078	-0.303499	-0.354711	-0.371663	-0.47914	-0.489524	-0.452755	-0.194938	-0.342109	-0.40232	-0.410329	-0.127246	-0.295768	-0.19834	-0.420234	-0.566359	-0.361573	-0.297957	-0.412049	-0.615504	-0.446881
AURKC	0.072464	0.0713495	0.0784649	0.0729848	-0.0274963	-0.0337271	-0.0240227	0.090124	0.0490945	0.110256	0.0287657	0.214073	-0.0627283	-0.163754	-0.00171052	-0.032832	0.0725214	0.0834462	-0.0501452	0.14099	0.0483394	0.0305362	-0.165445	0.0802516	0.113895	0.132366	0.0154224	-0.000737155
AUTS2	0.0446058	-0.0412633	-0.0449436	0.0716646	0.048465	0.000375864	-0.037882	0.0464407	0.0174705	-0.0698394	-0.0403383	-0.0287991	-0.0538849	-0.0634367	0.0266932	0.0203661	0.0436585	0.121172	0.106874	0.0548591	0.0948683	0.0976907	0.152211	0.101819	0.0356205	0.0797302	0.170301	0.0706625
AVEN	-0.128005	-0.415619	-0.188566	0.0152414	-0.44908	-0.328332	0.0565077	-0.317645	-0.235998	-0.314003	0.221849	-0.129205	0.00976825	-0.291417	-0.121584	-0.108646	-0.0532691	-0.275381	0.0197035	0.0451016	0.00113015	-0.0297976	0.0935855	-0.110239	-0.245809	-0.0129442	-0.182041	-0.246067
AVIL	0.611987	0.037527	0.476263	0.110194	0.42427	0.392421	0.0518923	0.364602	0.384397	0.314926	0.403803	0.368923	0.358958	0.14313	0.337226	0.0609606	0.329507	0.398934	0.484645	0.421486	0.363877	0.150306	0.44583	0.566849	0.356682	0.265705	0.600414	0.452929
AVL9	-0.302681	-0.305317	-0.24273	-0.327615	-0.436141	-0.212813	-0.404772	-0.179188	-0.280066	-0.486161	-0.339292	-0.233855	-0.392815	-0.351746	-0.409818	-0.39433	-0.386117	-0.425799	-0.50961	-0.472759	-0.350927	-0.238796	-0.457745	-0.417144	-0.370202	-0.3813	-0.439036	-0.378863
AVPI1	0.165811	0.0241254	0.115215	-0.124238	0.0839032	0.0895353	0.192174	0.0917252	-0.164178	0.0979972	0.0749215	0.0440502	-0.070155	-0.0191888	0.0692392	0.0612932	-0.208044	0.0821236	-0.040398	-0.17561	0.113629	0.0478465	0.0270854	-0.00569944	0.0385587	0.0660901	-0.370459	-0.323994
AVPR1A	-0.0135391	-0.00513814	-0.0595568	-0.154345	-0.121115	-0.110484	-0.0324852	-0.0538849	-0.279868	0.0174705	-0.149734	-0.00873828	-0.00193131	-0.0717495	0.0432102	-0.0267783	-0.00422464	-0.00171052	0.0889526	-0.138668	0.133902	0.189016	-0.0364729	0.212191	0.0749853	0.0297091	0.113818	0.0551075
AVPR2	0.217648	0.342583	0.221549	0.326737	0.163782	0.22664	0.33254	0.124892	0.194713	-0.0132952	0.344324	0.194569	0.194259	0.0949204	0.264445	0.360385	0.423309	0.503857	0.14839	0.310429	0.265705	0.313072	0.306099	0.27323	0.0504168	0.401085	0.416248	0.487253
AWAT2	-0.214004	0.0344664	0.085136	0.0119199	0.0337264	-0.0513782	-0.0705597	-0.128657	-0.129814	-0.205844	-0.351448	-0.308543	-0.107753	-0.204939	-0.259153	-0.257846	-0.173806	-0.255134	-0.405073	-0.324381	-0.162985	-0.282773	-0.439302	-0.318141	-0.21734	-0.357583	-0.360289	-0.441061
AXDND1	0.353397	-0.0859307	0.266356	0.513952	0.186679	0.165162	0.236621	9.2717e-05	0.300244	0.186561	0.313482	0.221783	0.0394237	0.225823	0.0644089	0.536981	0.371212	0.323743	0.367009	0.437479	0.124391	0.404739	-0.18561	0.309833	0.149308	0.312841	0.188393	0.10857
AXIN1	-0.247893	-0.250185	-0.247051	-0.243685	-0.227838	-0.134648	-0.147974	-0.294016	-0.331396	-0.360419	-0.229549	-0.246142	-0.260684	-0.336989	-0.312703	-0.212097	-0.314934	-0.177278	-0.293485	-0.299545	-0.311494	-0.30427	-0.394615	-0.228798	-0.336718	-0.274042	-0.446594	-0.404647
AXIN2	0.103766	0.0456431	0.0951705	0.0672601	0.0490374	0.0472935	0.0642335	0.0406444	0.0345065	-0.028307	-0.117311	0.0575593	-0.149941	0.0241254	-0.181947	0.0406444	-0.221741	-0.380004	0.0302169	-0.094491	-0.0352192	-0.134141	0.01336	0.129992	-0.0640359	-0.0655706	0.00527683	-0.216982
AZI2	0.128869	0.0432102	-0.0198098	-0.0470556	0.0720183	-0.0078188	0.0272858	0.0069358	0.0321395	0.100985	0.054027	0.119277	-0.0243062	0.025385	-0.0755918	0.112913	-0.0352192	-0.00669244	-0.116068	0.046266	-0.0785922	0.124071	-0.131853	0.258066	0.00522726	-0.0596814	0.0875069	-0.0926099
AZIN1	-0.0687556	0.0120396	-0.206239	-0.16242	0.0457736	-0.294954	-0.0993945	-0.183298	-0.244382	-0.192637	-0.342824	0.104178	-0.162652	0.11553	-0.103588	-0.0463803	-0.18474	0.0329087	-0.142661	-0.349874	-0.207193	-0.0570536	-0.0836826	0.0738125	-0.195327	-0.126065	-0.0337857	-0.169002
AZIN2	0.221849	0.00722858	0.116705	0.398292	0.0639332	0.253027	0.238839	0.309632	0.183825	0.237225	0.297858	0.311886	0.23784	0.192719	0.198464	0.254402	0.553852	0.440374	0.293509	0.208504	0.37197	0.263076	0.340746	0.351259	0.216443	0.27354	0.155989	0.318865
B3GALNT1	0.0212895	-0.0154429	-0.0179991	-0.0314817	-0.157814	-0.0421288	-0.0630536	0.309242	0.00218975	-0.0078674	0.172728	0.0585049	0.0684052	0.313375	0.350019	0.184362	0.485541	0.480742	0.197942	0.152472	0.392248	0.297705	0.579335	0.178249	-0.0801077	0.180435	0.49904	0.302502
B3GALNT2	0.235521	0.515716	0.465806	0.262537	0.500676	0.189854	0.270227	0.26123	0.316711	0.131268	0.20914	0.190068	0.154553	0.162687	0.0704693	0.356426	0.0626774	0.285318	0.260224	0.302616	0.0967408	0.145077	-0.0133597	-0.102357	0.0185907	0.310556	0.116643	0.167138
B3GALT1	-0.453544	0.101394	-0.256933	-0.118663	-0.400581	-0.308362	-0.0471271	-0.185869	-0.506251	-0.18003	-0.0161665	-0.276168	0.0558308	-0.273428	-0.335697	-0.294151	-0.168578	0.00633002	-0.117252	-0.310831	-0.210078	0.0864419	-0.216057	-0.257122	-0.225426	-0.104572	-0.0939847	-0.0706439
B3GALT2	-0.0883865	0.0723979	0.0322562	0.115652	-0.0176229	-0.174281	0.163987	0.0188598	0.0605733	0.0490374	-0.0331951	0.0825124	-0.0789044	-0.111582	0.196008	-0.0648073	0.273112	0.214073	0.0276923	0.00950144	-0.149127	-0.00675692	-0.0686668	0.25671	0.00555294	-0.106955	-0.0769694	0.166776
B3GALT5	-0.037882	-0.115346	-0.164249	0.0303332	0.104488	-0.0594363	0.217746	0.175352	0.0490374	-0.244545	0.118814	-0.0327172	-0.0957942	-0.134326	0.139675	0.191386	0.188192	0.0476325	0.119049	0.148187	0.106379	-0.0724998	0.114046	0.00861175	-0.095969	0.171908	0.385404	0.392087
B3GAT3	0.137881	0.121928	0.0281423	0.288795	0.0376488	0.170863	0.395737	-0.109026	0.0993152	0.349749	0.239754	0.323743	0.238992	-0.0101114	0.344506	0.224515	0.362628	0.163051	0.155119	0.206668	0.156314	0.163353	0.197942	0.343977	0.0406444	0.199593	-0.0392105	0.220674
B3GLCT	0.9619	0.854499	0.581418	0.336408	0.496897	0.789671	0.21433	0.191275	0.453931	0.534767	0.733964	0.749612	0.878573	0.383381	0.390794	0.433382	0.281899	0.449838	0.546162	0.467841	0.549323	0.356166	0.178615	0.456368	0.357701	0.426675	0.432527	0.240609
B3GNT2	-0.0742975	0.148125	0.0142885	0.084754	-0.0431455	-0.0901193	0.00229735	-0.0600068	0.0976325	0.386322	0.297206	0.261694	0.123182	0.262438	0.324732	-0.0651819	0.0454314	-0.023952	0.132932	-0.104072	-0.0934284	-0.0567726	0.0195966	0.034035	0.0735147	0.240154	0.266855	0.223194
B3GNT4	0.101394	0.0233434	-0.0411911	0.106494	0.0502459	-0.0645134	0.0580042	0.152263	0.121111	-0.140519	-0.0168098	0.12174	-0.0717954	-0.163236	0.101498	0.0606777	-0.0132952	0.0553172	0.110338	0.0246064	0.161009	-0.0486934	0.0421889	0.0505288	-0.0406629	0.0232815	-0.0461903	-0.102357
B3GNT5	-0.196625	-0.249565	-0.327411	-0.257723	-0.147908	-0.25665	-0.408421	-0.238238	-0.277582	-0.167157	-0.19867	-0.105591	-0.271546	-0.196224	-0.283403	-0.311494	-0.260079	-0.417919	-0.321279	-0.184417	-0.261324	-0.187889	-0.201351	-0.147227	-0.236677	-0.308362	-0.251081	-0.37502
B3GNT9	-0.555771	-0.648867	-0.678042	-0.501405	-0.556603	-0.4999	-0.607423	-0.493992	-0.394474	-0.615724	-0.658474	-0.701729	-0.639248	-0.349373	-0.463652	-0.654009	-0.622506	-0.706687	-0.855865	-0.853379	-0.713084	-0.465434	-0.422327	-0.328714	-0.531586	-0.463652	-0.435222	-0.446594
B3GNTL1	-0.0561465	-0.0328853	-0.23133	-0.284964	-0.246572	-0.196885	-0.272238	-0.141891	-0.222376	-0.292562	-0.398862	-0.155991	-0.0935866	-0.241921	-0.136045	-0.0637278	-0.239639	-0.198927	-0.118925	-0.037147	-0.262233	-0.104424	-0.1666	-0.231547	-0.22674	-0.175845	-0.268309	-0.329656
B4GALNT2	0.587048	0.395737	0.643694	0.648946	0.572978	0.603298	0.404338	0.417534	0.554279	0.358226	0.336632	0.278045	0.193179	0.30701	0.233115	0.233476	0.148001	0.113895	0.302033	0.312109	0.311411	0.26658	0.26031	0.394691	0.296223	0.216384	0.302263	0.400412
B4GALNT3	0.188044	0.133203	0.136609	0.34935	0.136025	0.160017	0.388143	0.286518	0.264117	0.205286	0.215825	0.215959	0.233384	0.403186	0.337799	0.260224	0.277576	0.319688	0.132823	0.447727	0.552089	0.346943	0.299138	0.383381	0.372906	0.361746	0.522497	0.242931
B4GALNT4	-0.0397665	-0.0649535	0.000216621	0.0318012	0.154301	0.0550535	0.081142	0.0553172	0.0245056	0.0560406	-0.0405477	0.078723	-0.0452705	0.0128856	0.223194	-0.0810488	-0.00506597	0.011315	0.143921	-0.0410277	0.0688738	0.0568733	0.253636	0.0614329	-0.162093	0.147237	0.213432	0.0386118
B4GALT1	-0.650849	-0.651606	-0.836299	-0.707556	-0.469143	-0.501245	-0.591117	-0.567887	-0.508656	-0.875738	-0.628246	-0.486693	-0.773984	-0.504002	-0.606022	-0.768833	-0.662632	-0.809537	-0.841613	-0.704445	-0.601233	-0.638518	-0.563723	-0.540065	-0.787312	-0.558587	-0.568719	-0.672208
B4GALT2	1.04753	0.915943	0.831433	0.627235	0.414445	0.193311	0.987307	1.84977	0.163782	0.93043	0.693067	0.201257	0.731295	0.678533	0.543369	0.719699	0.483754	0.636964	0.679032	0.854499	0.30427	0.408925	0.213477	0.461636	0.492791	0.518245	0.66594	0.110256
B4GALT3	-0.0912954	-0.182348	0.343708	0.298686	0.457734	0.123639	0.343459	0.378686	0.104039	0.0163191	0.0390749	-0.00569944	0.040232	-0.0355119	-0.0945489	0.325435	0.0855829	-0.210886	0.228978	0.308411	0.137564	-0.023638	-0.0195866	0.026356	0.130056	-0.0205651	-0.155237	0.154927
B4GALT4	-0.0409044	0.185286	0.0416003	-0.0810488	0.11769	-0.0976391	-0.0791539	-0.0625122	0.0601664	0.00369691	-0.0222731	0.226029	0.0486109	-0.121874	-0.139411	0.168778	-0.164249	-0.210956	0.0565536	-0.133696	-0.0707662	-0.0957095	-0.0343795	-0.443987	-0.00562115	0.135464	-0.020957	0.0648582
B4GALT5	-0.551972	-0.368391	-0.254371	-0.424679	-0.639747	-0.403076	-0.239377	-0.278092	-0.425415	-0.257485	-0.613325	-0.6043	-0.403792	-0.341774	-0.516392	-0.621679	-0.432239	-0.686223	-0.519799	-0.494974	-0.474833	-0.533829	-0.586443	-0.544569	-0.440506	-0.550272	-0.60359	-0.329375
B4GALT6	0.0436283	-0.0981559	0.0216784	-0.0409044	0.11183	0.0276923	-0.0482539	-0.0386189	-0.0912333	0.110719	0.008031	0.0252313	-0.0483168	0.00285215	-0.0627922	0.18979	0.106116	0.0426484	0.0861676	-0.0765987	-0.0397665	0.06175	0.0972585	0.040232	0.103142	0.0545295	-0.129749	-0.0643105
B4GALT7	0.0294858	0.193645	0.144892	0.22941	0.0812506	-0.00212364	0.263274	0.221632	0.0999584	0.129495	0.187699	0.108807	0.204634	0.0183673	0.167887	-0.112182	0.168696	0.141867	0.0814651	0.0209035	-0.0342774	-0.177847	0.0764337	0.150807	-0.0588841	-0.0545792	0.0216123	0.107766
B4GAT1	-0.378863	-0.364256	-0.223464	-0.394959	-0.511225	-0.169255	-0.111784	-0.318734	-0.208383	-0.143736	0.161408	-0.106539	0.00422293	-0.326649	-0.0854277	0.226711	0.308814	0.157572	0.143476	0.129625	0.0223922	0.161408	0.0418268	0.15785	0.278129	0.297206	0.0339093	-0.0135391
B9D2	0.412899	0.310759	0.183395	0.116415	0.227844	0.420632	0.230359	0.14826	0.223035	0.212994	0.311036	0.376427	0.30174	0.243619	0.15664	0.305097	0.27068	0.329159	0.356041	0.148582	0.196297	0.29904	0.0684522	0.233263	0.168249	0.203053	0.046152	0.215288
BAAT	-0.567312	-0.222276	-0.3813	-0.301823	-0.263263	-0.453688	-0.600188	-0.497211	-0.585574	-0.553516	-0.466214	-0.434527	-0.500658	-0.478768	-0.247129	-0.500851	-0.507322	-0.549072	-0.701207	-0.430806	-0.637235	-0.566936	-0.576368	-0.799789	-0.653635	-0.411905	-0.814509	-0.93386
BABAM1	1.89709	1.40681	1.71097	1.09057	1.29402	1.67904	1.30473	1.36486	1.75036	1.36486	1.34521	1.20175	1.76833	1.63958	1.48798	1.228	1.24594	1.18373	0.933857	1.09057	1.02764	0.767098	1.02148	0.808724	0.989927	1.13717	0.743359	0.850475
BACE1	-0.119355	-0.264822	-0.295864	-0.148932	-0.15768	-0.0917466	-0.17561	0.0514373	-0.168344	-0.245999	-0.189566	-0.114361	-0.22834	-0.205655	-0.220782	-0.256434	-0.281511	-0.255765	-0.266575	-0.238796	-0.246067	-0.113462	-0.357704	-0.28586	-0.241704	-0.25632	-0.225333	-0.200018
BACE2	0.0114078	0.158186	0.120176	0.232594	0.144759	0.14313	0.0770633	0.110826	0.172537	0.208727	0.0624241	0.0949204	0.0315944	0.0422468	-0.00284453	0.0294858	-0.0141319	0.0761313	0.0828912	-0.0533968	0.120176	-0.0533968	0.0693595	0.113685	0.0311567	0.0298363	0.045709	-0.0653922
BACH1	-0.630297	-1.09302	-1.43728	-0.983282	-0.816508	-1.05548	-1.06381	-0.825503	-1.00489	-1.03645	-1.30551	-1.03866	-1.45923	-0.655908	-0.811504	-1.24215	-1.1136	-0.819044	-0.97643	-0.845015	-1.09718	-0.808544	-0.895632	-0.736019	-0.984463	-1.04723	-0.997865	-1.20872
BACH1-IT3	-0.0100587	0.0164293	-0.14747	0.172473	0.214165	-0.0433593	-0.131766	-0.0426601	-0.249565	-0.12105	-0.149127	-0.121811	-0.0417281	-0.0483168	0.0134975	-0.0360245	-0.157011	-0.203451	-0.298322	-0.295262	-0.359383	-0.267119	-0.533078	-0.135161	-0.126636	-0.0247223	-0.260364	-0.321966
BACH2	0.237307	0.356041	0.294849	0.235521	0.300055	0.248699	0.229661	0.213604	0.26031	0.235209	0.226856	0.208618	0.214235	0.213833	0.219069	0.132982	0.136674	0.0444628	0.045709	0.210615	0.179364	0.194848	0.293614	0.189081	0.145717	0.246744	0.266433	0.099889
BAG1	0.0600311	0.0476929	0.0416599	0.0297091	0.0201375	0.00190032	0.106002	-0.051412	-0.037492	0.191512	0.0682627	0.0795202	0.114399	0.197403	-0.110167	0.0574084	0.299647	0.198797	0.00237913	0.00383844	0.124189	0.033645	0.167277	0.0965591	-0.116068	-0.0299313	0.25671	0.065624
BAG2	0.381288	0.341532	0.183779	0.127655	0.275708	0.248402	0.180978	0.14453	0.0915068	0.239507	0.244962	0.407066	0.255838	0.217746	0.0754168	0.310429	0.0865	0.196743	0.25671	0.326149	0.337226	0.15785	0.113895	-0.28869	0.193743	0.146412	-0.216057	-0.149941
BAG4	-0.441974	-0.433235	-0.335288	-0.58936	-0.556436	-0.544934	-0.411303	-0.512674	-0.435022	-0.509795	-0.530853	-0.574243	-0.658705	-0.597498	-0.547937	-0.436697	-0.64776	-0.61861	-0.484447	-0.498229	-0.521407	-0.580145	-0.37284	-0.409625	-0.439036	-0.560501	-0.40232	-0.608531
BAG6	0.784588	0.669625	0.572113	0.656544	0.564212	0.637615	0.672265	0.459481	0.717558	0.742641	0.727531	0.546908	0.8523	0.679565	0.654302	0.454166	0.523701	0.707687	0.477257	0.475312	0.667945	0.601795	0.554279	0.238182	0.597824	0.752752	0.500185	0.519036
BAGE2	0.971031	1.12147	0.830185	1.0196	1.4134	0.805265	0.972612	0.870337	0.878573	0.710981	0.841984	0.626102	0.817563	0.406164	0.451567	0.136094	0.369074	0.504796	0.298827	0.0181806	0.26586	0.429392	0.417731	0.344324	0.199662	0.396497	0.487764	0.541131
BAGE4	-0.248899	-0.287547	-0.514832	-0.425415	-0.330236	-0.401867	-0.362861	-0.184137	-0.405436	-0.412049	-0.544783	-0.429647	-0.560501	-0.281958	-0.266807	-0.460521	-0.347897	-0.260079	-0.410973	-0.348375	-0.431845	-0.217184	-0.262807	-0.344975	-0.231745	-0.370875	-0.140368	-0.378311
BAHD1	0.238182	0.412492	0.197676	0.51597	0.488064	0.391087	0.258995	0.264187	0.381135	0.678533	0.363043	0.733964	0.603298	0.576987	0.524478	0.615536	0.574707	0.626579	0.496019	0.699279	0.51597	0.428156	0.459698	0.462116	0.59277	0.552521	0.565118	0.362045
BAIAP2	0.0730764	0.208798	0.0728492	-0.0877647	0.0142885	0.116534	-0.00144274	0.0308574	0.12401	0.191794	0.276707	0.0970426	0.284693	0.198007	0.360825	0.0565536	0.242931	0.308036	0.235751	0.110606	0.338768	0.198066	0.286424	0.142935	0.437991	0.562399	0.260998	0.376698
BAIAP2L1	0.151418	-0.113759	-0.021083	-0.100604	0.273654	0.0218084	0.121277	0.0318558	0.00950144	-0.160596	-0.112708	0.174041	-0.32532	0.06175	0.176353	-0.0440507	0.00649391	0.168568	0.20893	0.0640503	0.340641	0.166234	-0.0338942	0.168022	0.200432	0.0605733	0.0141101	0.222293
BAIAP2L2	-0.0994552	-0.189214	-0.335175	-0.0111691	-0.0114811	-0.20779	-0.298322	-0.237684	-0.254752	-0.151285	-0.230231	-0.0497815	-0.321966	-0.235408	-0.359912	-0.403657	-0.307992	-0.407505	-0.318734	-0.447148	-0.326087	-0.159835	-0.249565	-0.0924753	-0.262029	-0.333803	-0.218957	-0.284402
BAIAP3	0.22258	0.617392	0.38407	0.506779	0.426902	0.606165	0.655462	0.473828	0.372395	0.465806	0.66594	0.461902	0.408711	0.386154	0.43296	0.354306	0.358958	0.420632	0.544231	0.582681	0.391087	0.470367	0.38407	0.442017	0.295671	0.411841	0.40209	0.547631
BAK1	0.49904	0.549789	0.407344	0.372519	0.441836	0.85836	0.506153	0.179432	0.26956	0.441668	0.234941	0.670214	0.371378	0.471287	0.208855	0.395545	0.228628	0.287088	0.33254	0.179834	0.608887	0.697764	0.701698	0.355784	0.513952	0.507491	0.656544	0.458222
BAMBI	-0.977131	-1.06307	-1.01122	-0.688614	-1.19679	-1.01122	-1.02452	-0.831419	-0.642538	-0.75786	-0.766674	-1.18592	-0.586443	-1.06993	-0.735373	-0.673434	-0.839082	-0.724615	-0.66616	-0.541924	-0.543219	-0.654985	-0.748436	-0.888175	-0.738177	-0.543362	-0.626361	-0.727587
BANCR	0.081142	0.425472	0.170433	0.667252	0.263606	0.20893	0.163142	-0.186793	0.180222	-0.0677275	0.210775	0.160017	0.192313	0.0161969	0.38296	0.462774	0.256178	0.463427	0.260757	0.401907	0.443208	0.382331	0.0707261	0.568543	0.279462	0.213203	0.555105	0.430158
BANK1	0.488064	0.552873	0.372119	0.351907	0.381481	0.429392	0.497855	0.367481	0.348417	0.402318	0.421913	0.58359	0.5574	0.41715	0.480742	0.509732	0.455665	0.373893	0.525595	0.394519	0.427183	0.451567	0.488655	0.511774	0.527881	0.384397	0.340063	0.345347
BAP1	0.466726	0.338184	0.344686	0.154645	0.382187	0.267348	0.47186	0.323655	0.282636	0.278316	0.329661	0.409273	0.159259	0.335128	0.545417	0.521644	0.530954	0.382468	0.419341	0.473828	0.374312	0.360385	0.400077	0.245533	0.296655	0.318587	0.30059	0.360385
BARD1	-0.190695	-0.252895	-0.292562	-0.17954	-0.304057	-0.388611	-0.310967	-0.529621	-0.179388	-0.15815	-0.402474	-0.315501	-0.296867	-0.433803	-0.292213	-0.259762	-0.424256	-0.20593	-0.381684	-0.300671	-0.245581	-0.535194	-0.302448	-0.407975	-0.384142	-0.46242	-0.360419	-0.333803
BARHL1	0.0843485	-0.0393257	-0.0592848	-0.0376246	0.219724	0.0670456	-0.115487	0.102099	-0.0285339	0.0247622	0.0634516	-0.0110035	0.0601664	0.00856902	-0.0466056	0.309138	-0.0585658	0.331995	-0.418665	0.182306	0.195605	-0.20096	-0.0923995	-0.285232	0.111181	-0.215417	-0.0144201	0.0364707
BARX1	-0.0475658	-0.617508	-0.119821	-0.316999	0.0735732	0.151343	-0.0773512	-0.230031	-0.735373	-0.175344	-0.0625122	-0.211549	-0.246483	-0.225333	0.328407	0.00912169	-0.287333	-0.616459	0.167473	-0.365983	-0.339182	-0.204271	0.114641	-0.314387	0.170371	0.111135	0.0779864	0.133276
BARX2	0.0997378	0.351907	0.0593552	0.172103	0.336408	0.239208	0.223275	0.422283	0.178807	0.663902	0.217489	0.333752	0.337559	0.3319	0.396971	0.167955	0.122677	0.0930247	0.262139	0.229357	0.179578	0.247103	0.321587	0.166776	0.0892961	0.238275	0.102728	0.0671662
BATF	-1.00425	-0.858218	-0.895632	-0.781077	-1.07776	-1.00654	-0.891668	-0.962176	-0.798623	-0.7414	-0.971175	-0.957149	-0.622827	-1.22267	-1.0907	-1.07425	-0.895632	-0.951084	-0.881467	-0.997241	-0.932691	-1.11019	-0.981326	-0.770365	-1.18851	-0.890741	-0.904379	-0.849138
BATF2	0.152314	0.128929	0.198305	0.352624	0.132628	0.0900671	0.194976	0.35783	0.248211	0.185062	0.307789	0.148001	0.394801	0.237674	0.111027	0.0850654	0.00303955	-0.212918	0.244227	-0.0170517	-0.171735	0.143664	0.188967	0.212665	-0.163672	0.0756843	0.208037	-0.209466
BATF3	-0.0349331	0.0745994	0.072729	0.0770633	-0.0145439	-0.0535666	0.112777	0.0364707	0.166776	0.0200779	0.0602231	0.0838151	0.15845	0.0366455	0.190917	0.0279886	0.282362	0.061609	0.0704039	0.135147	-0.0243062	0.141707	0.041157	0.228806	0.211898	0.079857	0.0762503	0.123331
BAZ1A	-0.0654792	-0.0924753	0.0565077	-0.152969	0.106989	-0.0230718	-0.375246	-0.321888	0.111431	-0.0781191	-0.0738124	-0.192554	-0.254929	-0.17457	-0.185682	-0.36468	-0.18938	-0.109653	-0.0238298	-0.165078	-0.0307725	-0.29719	0.249699	-0.173579	0.0930749	-0.260079	-0.149812	-0.203185
BAZ1B	-0.471474	-0.423646	-0.397941	-0.51467	-0.60784	-0.232927	-0.284593	-0.406278	-0.192175	-0.377226	-0.261768	-0.125104	-0.189214	-0.22355	-0.407005	-0.252597	-0.486983	-0.0254126	-0.337652	-0.299778	-0.0672147	-0.0608176	-0.204408	-0.351198	-0.198037	-0.0700691	-0.284185	-0.0843711
BAZ2A	0.100985	0.0773171	0.123536	0.102006	0.140881	0.112536	0.022736	-0.0331211	0.0760404	0.134022	0.239133	-0.0126072	0.215532	0.0520906	0.221434	0.0844094	0.150424	0.270409	0.306003	0.106815	0.192174	0.204347	0.276497	0.224455	0.101754	0.0446761	0.042704	0.186244
BAZ2B	-0.866577	-0.80153	-1.01571	-0.794071	-0.70152	-0.614863	-0.724167	-0.47007	-0.686223	-0.829526	-0.745964	-0.817011	-0.952369	-0.517962	-0.613325	-1.09955	-0.977131	-0.834477	-0.816175	-1.00693	-0.922579	-0.851307	-0.727846	-0.785337	-1.04779	-0.861423	-0.83086	-0.948027
BBOF1	-0.61528	-0.414134	-0.502513	-0.61043	-0.420728	-0.443645	-0.654985	-0.378311	-0.430324	-0.318015	-0.634315	-0.427407	-0.363873	-0.36644	-0.525875	-0.573689	-0.441061	-0.356665	-0.943604	-0.417779	-0.447702	-0.336451	-0.451909	-0.634612	-0.636771	-0.58726	-0.676634	-0.678042
BBOX1-AS1	0.114046	0.0413003	-0.110167	-0.102537	-0.100295	0.0751296	0.0167795	-0.0578706	-0.104995	-0.0146654	-0.195932	0.0150277	-0.18808	-0.0707662	-0.150918	0.00548332	-0.337426	0.000793665	-0.0656889	-0.105538	-0.133777	-0.149812	-0.114232	-0.219888	-0.0567252	-0.113267	-0.182809	-0.126851
BBS1	0.0973446	-0.0296155	-0.0322564	-0.155477	-0.0355119	-0.124365	-0.00834385	-0.0330009	0.103085	0.0472369	-0.0544074	0.100985	0.103142	0.145138	0.0968571	-0.0801077	0.0676375	0.0650351	0.0308574	-0.0761112	-0.00741749	-0.119477	-0.381157	-0.0985637	-0.28586	0.0174705	-0.341436	-0.380358
BBS12	-0.328936	-0.164866	-0.251269	-0.236089	-0.145199	-0.202231	0.00722858	-0.256559	-0.0804951	-0.201933	-0.0572096	-0.276536	-0.289935	-0.15827	-0.223008	0.0294358	-0.220543	-0.0263117	-0.0985637	-0.152134	-0.0626639	-0.226635	0.162168	-0.214089	-0.176282	-0.346236	-0.220239	-0.102195
BBS2	-0.29719	-0.0468441	-0.266934	-0.11052	0.00441245	-0.157987	-0.764592	-0.111033	0.0772547	0.0249824	-0.19016	0.0233966	0.325435	0.0179158	-0.108263	0.191329	0.347434	0.00879511	-0.0935866	0.136548	0.307116	0.0286715	0.143591	0.112853	0.117441	0.0330584	-0.045823	0.372519
BBS4	-0.245233	-0.263544	0.000907551	-0.0804951	-0.021449	-0.00977757	-0.1802	-0.14173	-0.101902	0.0131365	0.0266212	0.0184932	0.0684522	0.0642715	0.136729	-0.188306	0.0368789	0.0493689	0.0417598	0.0191972	-0.0078674	-0.0246916	-0.0337857	-0.161941	0.129036	0.191386	-0.0342774	0.100617
BBS5	3.76626e-05	-0.171829	-0.152134	-0.0925314	-0.0290244	-0.244012	-0.232579	-0.161723	0.0422468	-0.242416	0.0754168	0.118299	-0.245407	-0.0229648	0.0444628	-0.232478	-0.0675017	-0.0713326	-0.176816	-0.254168	-0.150078	0.0284976	-0.218679	0.0839032	0.278415	0.0199441	0.24071	-0.0775068
BBS7	-0.435388	-0.198599	-0.0803446	-0.417144	-0.108076	-0.398564	-0.305832	-0.242305	-0.397351	-0.203451	-0.392485	-0.335823	-0.259424	-0.433235	-0.320747	-0.441205	-0.116659	-0.36924	-0.230591	-0.193646	-0.398862	-0.434701	-0.50588	-0.438767	-0.23285	-0.430948	-0.584947	-0.0666153
BBS9	-0.668591	-0.358657	-0.366091	-0.473951	-0.43253	-0.43253	-0.705183	-0.446468	-0.54417	-0.351037	-0.404397	-0.488352	-0.542986	-0.6981	-0.515028	-0.351854	-0.299778	-0.375533	-0.270965	-0.39262	-0.199366	-0.246483	-0.173579	-0.347367	-0.0808973	-0.3175	-0.239884	-0.063141
BBX	-0.0524447	-0.142434	0.026356	-0.266388	-0.173744	-0.0997175	-0.12282	-0.115989	-0.045823	0.00608714	-0.135325	-0.0261605	-0.116888	-0.148249	0.0256439	-0.13076	-0.0582243	-0.0182765	-0.0887628	3.76626e-05	0.0730299	0.0856548	-0.120316	-0.0813627	0.026356	0.131268	0.166096	-0.146503
BCAM	0.121863	0.00682637	0.0445422	0.00466702	0.00676189	0.128563	0.311886	0.0641161	0.648946	0.286424	0.497855	0.307116	0.266671	0.399642	0.270896	0.337919	0.475661	0.303648	0.278799	0.176881	0.251214	0.349247	0.403186	0.0723979	0.262233	0.311784	0.273329	0.391524
BCAN	-0.140368	0.0169182	0.0794607	-0.00669244	-0.0223501	-0.111177	0.106283	0.0419326	-0.0174281	0.191441	-0.146582	0.248901	0.0883841	0.165039	-0.0263706	0.0180164	0.140693	0.126602	0.0886492	0.223359	0.0510724	0.0323236	-0.165906	0.218336	0.173015	0.044807	0.14029	0.290653
BCAP29	-0.35564	-0.273073	-0.162248	-0.237684	-0.316557	-0.338267	-0.0608962	-0.296224	-0.399002	-0.182882	-0.00529317	-0.150078	-0.200093	-0.0777522	0.145586	0.0909711	-0.130697	-0.0177594	0.196008	0.180497	-0.232927	-0.000833505	-0.0420344	-0.0509056	0.0109949	0.0554061	-0.213327	-0.0361401
BCAP31	-0.826677	-0.789222	-0.623868	-0.490313	-0.571153	-0.343818	-0.465796	-0.375533	-0.657644	-0.450557	-0.5532	-0.476414	-0.519909	-0.489807	-0.619888	-0.425663	-0.338739	-0.34448	-0.166451	-0.338835	-0.489338	-0.689567	-0.477485	-0.426597	-0.693515	-0.557645	-0.832555	-0.440233
BCAR1	0.102663	-0.0570536	0.090713	0.0421889	-0.0957095	0.178483	0.0212223	0.209966	0.250288	0.169692	0.27323	0.238911	0.353845	0.318752	0.653642	0.681079	0.579778	0.705089	0.771318	0.669625	0.541942	0.483304	0.606693	0.638316	0.520153	0.626102	0.488338	0.397299
BCAR3	-0.210812	-0.175421	-0.173204	-0.0366553	-0.129749	-0.121955	-0.132865	-0.168417	-0.146169	-0.0562077	-0.0277439	-0.157814	-0.126851	-0.159135	-0.3125	-0.114232	-0.117252	-0.207	-0.156099	-0.246572	-0.320566	-0.23718	-0.246645	-0.204598	-0.257615	-0.314616	-0.144036	-0.288801
BCAS2	-0.526415	-0.488352	-0.677424	-0.638274	-0.565697	-0.564659	-0.718547	-0.719812	-0.850112	-0.748436	-0.556436	-0.690196	-0.51955	-1.09792	-0.743326	-0.49837	-0.776	-0.642228	-0.35892	-0.463794	-0.659883	-0.726243	-0.696326	-0.556603	-0.537539	-0.691564	-1.00177	-0.691564
BCAS3	-0.419274	-0.40232	-0.489338	-0.5532	-0.504414	-0.465796	-0.476414	-0.504595	-0.44908	-0.427586	-0.381943	-0.521209	-0.39945	-0.492022	-0.492022	-0.448562	-0.468463	-0.67629	-0.587531	-0.525875	-0.439036	-0.370986	-0.489524	-0.465938	-0.405073	-0.298651	-0.416811	-0.377526
BCAS4	-0.440914	-0.437968	-0.536729	-0.48342	-0.52286	-0.450702	-0.584505	-0.620056	-0.568184	-0.307547	-0.601482	-0.508656	-0.531173	-0.521583	-0.72332	-0.568499	-0.680213	-0.681845	-0.835465	-0.490313	-0.528071	-0.541269	-0.617769	-0.804212	-0.525177	-0.547291	-0.690745	-0.635994
BCAT1	-0.243323	-0.379146	-0.317377	-0.445748	-0.562771	-0.417275	-0.30676	-0.295864	-0.532292	-0.407779	-0.608292	-0.599576	-0.414986	-0.64701	-0.185021	-0.539424	-0.308543	-0.327847	-0.464297	-0.403657	-0.639747	-0.649807	-0.941617	-0.989405	-0.628246	-0.729515	-0.564659	-0.751397
BCAT2	-0.10075	-0.100917	-0.375533	-0.129421	-0.06039	-0.157723	-0.489122	-0.0708429	-0.280765	-0.189448	-0.229435	-0.141675	-0.350678	-0.0657496	-0.168121	-0.35552	-0.0503913	-0.378412	-0.405726	-0.141366	-0.23399	-0.206136	-0.13836	-0.416205	-0.0681869	-0.174209	-0.342694	-0.289017
BCCIP	-0.401312	-0.458155	-0.49876	-0.273661	-0.23285	-0.194156	-0.218087	-0.521407	-0.729515	-0.361908	-0.196224	-0.386017	-0.235309	-0.357155	-0.296985	-0.473139	-0.360147	-0.236582	-0.356012	-0.286272	-0.181499	-0.262807	-0.486542	-0.0711338	0.000999067	-0.127103	-0.000610234	-0.260802
BCDIN3D	0.178196	0.178249	-0.190773	0.0483949	0.158376	0.11769	0.132046	0.131069	-0.0466056	0.136674	0.095855	0.017523	0.00303955	0.36374	0.212191	0.207332	0.171659	0.387687	0.184421	0.238911	0.202192	0.153222	0.163142	0.0977558	0.231394	0.181821	0.155491	0.0345668
BCHE	-0.402017	0.034035	-0.177105	0.00422293	-0.202154	-0.0846605	-0.214374	0.0174211	-0.260802	-0.129678	-0.124365	-0.105653	-0.0158615	0.0322562	0.175352	0.104427	-0.100295	0.0594989	0.144387	-0.196533	-0.231437	-0.0589463	-0.0792237	0.167887	0.187769	0.343977	-0.127525	0.0049872
BCKDHA	-0.0453309	-0.0585658	-0.047256	0.0328548	0.0441473	-0.0366553	0.0350308	0.0195278	-0.0297976	-0.0845377	-0.124518	0.0367704	-0.0917466	0.0692985	-0.0190746	0.259941	0.0978996	0.088906	0.210093	0.183151	0.216659	0.20935	0.116812	0.138218	0.633803	0.0277454	-0.131535	0.0185907
BCKDHB	0.00582065	-0.105733	-0.146169	-0.120985	0.00161179	-0.0777522	-0.108496	-0.0265104	-0.0691492	-0.197517	-0.0712092	0.159711	-0.175421	-0.0636497	-0.0451561	0.110256	0.0227952	0.00446677	0.0345065	0.0936959	-0.0761776	-0.0169903	0.103142	-0.0194391	0.00741039	0.0477414	-0.0651096	0.0906487
BCKDK	0.422093	0.444194	0.229661	0.360102	0.249365	0.219724	0.136462	0.23598	0.288296	0.205509	0.24513	0.389481	0.450961	0.182411	0.347188	0.292495	0.263378	0.135008	0.213432	0.176435	0.145188	0.137199	0.285616	0.348973	0.216113	0.14839	0.166712	0.196683
BCL10	0.207479	0.0720799	0.0672176	0.180435	0.222434	0.551609	0.141707	0.259062	0.0398537	0.236556	0.258066	0.227658	0.114225	0.511774	0.319581	0.368029	0.39777	0.262053	0.379858	0.170093	0.360229	0.38407	0.284039	0.43942	0.524924	0.455665	0.031103	0.227006
BCL11A	0.100115	0.0703405	0.0669881	0.102876	0.0345668	0.246565	0.0222052	0.230747	0.200646	0.0555788	0.0776043	0.0806192	0.0775011	0.0768724	-0.0783252	-0.00593249	0.077787	0.0289735	-0.067457	-0.0219747	0.0984497	0.0571685	0.0863674	-0.0954805	0.0764815	0.00741039	0.0278597	-0.109499
BCL11B	-0.0473997	-0.200093	-0.161537	-0.182809	-0.148496	-0.258196	-0.116589	-0.0614413	-0.171087	-0.334569	-0.377526	-0.201143	-0.195239	-0.250458	-0.260226	-0.215137	-0.325711	-0.229833	-0.203548	-0.00569944	-0.140598	-0.218181	-0.187712	-0.177197	-0.202231	-0.0872959	-0.314616	-0.262627
BCL2	0.0691566	0.078269	0.0963162	0.0574725	0.152783	0.0518923	-0.0146085	0.134226	0.0565536	-0.0276231	-0.0330009	0.012429	0.043263	0.034035	0.0600311	0.0139388	-0.137385	-0.085364	-0.0676485	-0.0130632	0.0728492	0.0522751	0.0438415	0.0695339	0.0281423	0.0961516	-0.128502	-0.0351485
BCL2A1	-1.30841	-1.39959	-1.33983	-1.10826	-1.20787	-1.02197	-1.02132	-1.43939	-1.19012	0.222434	-1.2462	-1.28472	-0.827562	-1.41224	-1.78034	-1.19012	-1.52772	-1.09499	-1.67205	-2.02436	-0.800487	-1.17711	-1.14789	-1.33196	-1.11693	-1.11965	-0.997241	-1.03312
BCL2L1	0.138065	0.249453	0.306099	0.158959	0.246293	0.226856	0.338434	0.266356	0.221281	0.140221	0.15664	0.103396	0.153085	0.118544	0.123639	0.0542054	-0.148076	-0.0107795	-0.019882	0.0571166	0.017523	-0.00803642	0.0706625	0.0363861	-0.0302761	0.171602	0.031429	0.150187
BCL2L11	-0.210886	-0.149676	-0.145812	-0.0417856	-0.0816808	0.0258208	-0.246142	0.0850082	-0.217255	-0.309411	-0.295768	-0.312061	-0.133263	0.108124	-0.0284748	-0.360289	-0.282248	-0.0347338	-0.582649	-0.21507	-0.189642	-0.118427	-0.114311	0.248546	-0.0399779	-0.58936	-0.230591	-0.204479
BCL2L12	0.178937	0.00601134	-0.0118553	-0.151759	0.239343	0.191794	-0.0931008	0.0476929	-0.0992401	-0.136763	-0.00456226	-0.38547	-0.0932467	-0.0495032	-0.179188	0.0969108	0.0214915	-0.180374	-0.204336	0.197876	-0.0118553	-0.152462	-0.112296	-0.033601	-0.0254722	-0.114174	0.111372	-0.114976
BCL2L13	-0.0560851	-0.0617207	-0.136558	0.172405	-0.00334627	0.0552059	-0.0717954	-0.16217	-0.050762	-0.0135391	0.0938712	0.0611505	0.0635641	0.059672	0.266433	0.0653324	0.129372	0.156172	0.0805662	0.189922	0.174869	0.308731	0.281263	0.061788	0.295347	0.24513	0.092805	0.278501
BCL2L14	0.255922	0.207402	0.299248	0.190189	0.327255	0.226922	0.0781375	0.295764	0.172103	0.234205	0.150239	0.195153	-0.0130079	0.052692	0.150363	0.0883841	0.082213	0.14782	0.0986633	0.149308	0.1369	0.0393734	0.137154	0.060725	0.0858397	0.134226	0.0447162	0.115025
BCL2L15	0.260483	0.00633002	0.14033	0.0352548	0.251301	0.0722661	-0.0193713	0.279354	0.0767645	0.0360736	0.156952	0.0858397	0.111569	0.0993152	-0.0491286	0.093513	0.050102	0.00350774	0.0910978	0.00314461	0.0901737	-0.135959	0.0421252	-0.132305	0.0202983	0.0697974	0.0229448	0.0528313
BCL2L2	-0.0459836	0.065871	-0.0773512	-0.302806	-0.0640359	-0.0806968	0.0332952	-0.233448	-0.220166	0.0398537	-0.00432488	-0.098947	-0.0268859	-0.177523	-0.140128	-0.0095793	-0.276536	-0.10889	0.00527683	0.0451646	-0.0610726	-0.16618	-0.0238298	-0.140598	-0.110718	-0.12409	-0.167894	-0.236582
BCL3	-0.908889	-0.867987	-1.04138	-0.983889	-0.868428	-1.03988	-1.02561	-1.25775	-1.11076	-0.94916	-0.929194	-0.990802	-0.87696	-1.16344	-1.33725	-1.11789	-1.36408	-1.13219	-1.3464	-1.18367	-1.24088	-1.39362	-1.23679	-1.22059	-1.44365	-1.24414	-1.26991	-0.814894
BCL6	0.0334578	0.147749	0.0758439	-0.109374	-0.00634766	0.104951	-0.0570536	0.0653324	-0.00616628	0.139675	0.061542	0.0712543	-0.0383644	0.0982711	0.163538	0.275251	0.108074	0.163987	0.0800271	0.034253	-0.0232429	-0.00576746	-0.0857107	0.0794607	0.0819935	0.142384	0.0512576	-0.189642
BCL6B	-0.774618	-0.50588	-0.588167	-0.683463	-0.964073	-0.71375	-0.539424	-0.875738	-0.51467	-0.752591	-0.655908	-0.328589	-0.626361	-0.542777	-0.808544	-0.504002	-0.540065	-0.316557	-0.535781	-0.308362	-0.527801	-0.966181	-0.466535	-0.538776	-0.884521	-0.432401	-0.963466	-0.890227
BCL7A	0.0429393	-0.205301	-0.206752	-0.188463	0.0379672	-0.151138	-0.0400804	-0.142211	0.0279886	-0.0854972	-0.0922516	0.00897588	-0.047668	-0.26724	0.0467271	-0.169168	0.127655	0.0842171	0.319688	0.029877	0.21842	0.239066	-0.250653	-0.183081	-0.199366	0.252707	0.182584	0.280905
BCL7B	-0.255245	-0.0187026	-0.120923	0.0119758	-0.129114	0.198305	0.227982	-0.165374	0.121666	0.247254	0.134384	0.365485	0.310669	0.282836	0.548564	0.469549	0.459481	0.382745	0.4676	0.44291	0.304535	0.278129	0.281089	0.280504	0.318363	0.308119	0.136462	0.116705
BCL7C	-0.0637995	-0.0922516	-0.0513782	0.0299288	-0.176371	0.132754	-0.18393	-0.00803642	0.0441018	-0.00144274	-0.118048	0.0563063	-0.0373882	0.221722	0.151132	0.0222685	0.202676	0.0536103	0.0266932	0.243237	-0.170751	-0.108496	0.0103693	0.381481	0.336408	0.158871	0.198797	0.429993
BCL9L	0.550158	0.507124	0.280626	0.43661	0.439918	0.422283	0.452002	0.480979	0.355784	0.367481	0.430999	0.561994	0.405245	0.532407	0.50357	0.558067	0.486986	0.581794	0.572429	0.378101	0.474252	0.536293	0.433757	0.231312	0.515092	0.567177	0.341408	0.202355
BCLAF1	-1.2066	-1.01983	-1.08105	-1.33983	-1.41695	-1.27427	-0.69458	-0.952369	-1.18481	-1.00303	-0.854141	-0.971175	-0.979236	-0.917245	-0.974102	-0.853379	-0.651606	-0.932691	-0.873351	-0.982698	-0.939522	-0.941164	-0.87661	-0.691564	-0.921664	-0.767022	-0.87696	-0.798623
BCO1	0.0797302	0.0188129	-0.0210292	-0.0456856	0.137262	0.0789891	0.0304676	0.0283078	-0.0927572	-0.0491286	-0.0529596	-0.115637	-0.431576	0.0247987	-0.0288615	0.0106254	0.0101873	-0.0745655	-0.120396	-0.245809	-0.0681869	-0.0901193	-0.0374381	-0.095969	-0.000141871	-0.18494	-0.103792	0.136548
BCOR	0.31541	0.236469	0.239269	0.347188	0.241182	0.282362	0.521864	0.284955	0.338184	0.312487	0.236948	0.315811	0.347434	0.314236	0.323164	0.310669	0.312841	0.209823	0.274022	0.334353	0.259163	0.310759	0.201257	0.334995	0.30701	0.282096	0.337382	0.195455
BCORL1	-0.0388496	-0.146945	-0.0635344	-0.108263	0.0760878	-0.0746559	0.0302817	-0.0707662	-0.150608	-0.204598	-0.138979	-0.142809	-0.132935	-0.123321	-0.118925	0.0266932	-0.159835	-0.140694	-0.0774015	-0.0687181	0.055782	-0.0664658	-0.131468	-0.112478	-0.0736307	-0.0435551	-0.152516	-0.0528411
BCR	-0.24343	-0.0944269	-0.174501	-0.371576	-0.283964	-0.202312	-0.233448	-0.311812	-0.31581	-0.312061	-0.215137	-0.140229	-0.44893	-0.0453309	-0.238656	-0.330027	-0.271546	-0.377797	-0.479837	-0.503371	-0.440369	-0.37805	-0.359912	-0.406278	-0.435388	-0.420063	-0.385715	-0.489338
BCS1L	0.424918	0.670214	0.616902	0.422093	0.456671	0.414052	0.479653	0.414052	0.502867	0.508891	0.467064	0.542691	0.57737	0.325222	0.408925	0.356166	0.351342	0.339592	0.362045	0.440732	0.469848	0.360516	0.421486	0.253508	0.434474	0.326399	0.322946	0.434474
BDH1	0.854499	-0.0818177	0.94251	0.450255	0.729749	0.831433	0.514625	0.899448	1.33417	0.454166	0.792402	0.763727	0.917605	0.906855	0.726559	0.762639	0.755902	0.720385	0.737274	0.96539	0.875899	1.05067	0.915943	1.00398	0.8523	1.10166	0.503136	0.825189
BDKRB1	-0.197952	-0.354615	-0.288024	-0.613325	-0.155237	-0.325199	-0.496075	-0.308788	-0.486833	-0.292776	-0.521792	-0.244382	-0.568499	-0.279868	-0.295346	-0.433803	-0.656193	-0.558046	-0.787018	-0.827852	-0.564789	-0.552535	-0.557416	-0.816508	-0.394808	-0.57292	-0.747551	-0.89491
BDKRB2	-0.0245688	-0.0565363	0.0263989	-0.237071	-0.313159	-0.129509	-0.0656191	-0.0745655	0.107511	-0.116154	-0.363162	0.0989555	0.183151	0.133203	-0.0679086	0.0596092	0.210532	-0.0529596	0.0816736	0.0841796	0.0991899	0.274121	0.0360133	-0.00134609	-0.0309492	0.111569	-0.0400299	-0.290132
BDP1	-0.708931	-0.823069	-0.67258	-0.751159	-0.519112	-0.733741	-0.686223	-0.704445	-1.00236	-1.0091	-0.668854	-0.714977	-0.775351	-0.896721	-0.653635	-0.854141	-0.540897	-0.609393	-0.54552	-0.621264	-0.735373	-0.750741	-0.900243	-0.953434	-0.915324	-0.803022	-0.959156	-1.02815
BECN1	-0.481808	-0.352221	-0.585372	-0.267356	0.0356205	-0.210461	0.039308	-0.563918	-0.213749	-0.515648	-0.287131	-0.459451	-0.427724	-0.189815	-0.242141	-0.160774	0.0530256	0.181628	0.291563	-0.21668	-0.324688	0.171324	0.0985211	0.251127	0.178196	0.195605	0.254662	0.342171
BEND3	-0.163064	0.102996	0.040039	-0.276758	-0.0842484	-0.117714	-0.0699806	0.183151	-0.251594	-0.16274	-0.270154	-0.118796	-0.0979607	-0.188629	-0.086428	-0.0132952	-0.0837269	-0.0129442	-0.160229	-0.179937	0.0247622	-0.153157	-0.20593	-0.239291	-0.235907	-0.166451	-0.493283	-0.304909
BEND4	-0.439939	-0.240299	-0.39433	-0.217806	-0.304909	-0.25346	-0.4028	-0.0188265	-0.361573	-0.463448	-0.428401	-0.117252	-0.37181	-0.307762	-0.290586	-0.130432	-0.280191	-0.321966	-0.537943	-0.0920896	-0.262807	-0.261135	-0.277264	-0.239543	-0.328936	-0.162093	-0.298075	-0.429647
BEND6	-0.177434	0.0318558	0.00314461	0.0624901	0.0713495	-0.0993253	-0.147324	-0.000243052	-0.202231	-0.135161	-0.242018	-0.235694	-0.033601	-0.381157	-0.141114	-0.0893841	-0.217255	-0.075201	-0.236891	-0.159286	-0.249271	-0.15809	-0.106261	-0.111315	-0.113947	0.116643	-0.0411911	-0.0235227
BEND7	-0.0441158	-0.118727	-0.0134809	-0.285447	0.0254499	-0.203185	0.0425384	-0.0544692	-0.280629	-0.140945	-0.0184035	-0.203377	-0.379017	0.127853	-0.184483	0.0575247	-0.171913	0.107165	-0.173076	0.0250961	-0.182041	0.0414493	-0.228482	0.0908363	-0.141274	-0.191845	-0.0675737	-0.120474
BEST1	0.347188	0.488923	0.154483	0.0957448	0.199072	0.368414	0.172103	0.189155	0.303751	0.413664	0.189854	0.319688	0.2452	0.296655	0.301013	0.000793665	0.257504	0.361265	0.228523	0.247336	0.19761	0.214592	0.142935	0.0510724	0.165104	0.0875644	0.158314	0.291477
BEST3	-0.0252343	-0.0823946	-0.0450014	-0.125681	-0.0540854	-0.0404623	-0.0629982	-0.1783	-0.250353	-0.173076	-0.111876	-0.0870842	-0.135959	-0.172906	0.172579	-0.171829	-0.115132	-0.0943355	-0.20408	-0.130496	-0.154187	-0.0876809	-0.218181	-0.199892	-0.0847268	0.0847096	-0.13629	-0.0281996
BET1L	0.112658	-0.126704	-0.199694	0.316458	-0.0417856	0.0713495	0.221072	-0.271059	0.0453726	0.0700572	0.196079	0.118614	0.0964126	0.141062	0.0818408	0.347557	0.218336	0.40154	-0.0570902	0.228676	0.0146308	0.196508	0.22941	-0.133575	-0.122318	0.106283	-0.335957	0.0271566
BEX2	-0.703505	-0.367708	-0.547937	-0.416354	-0.746989	-0.605584	-0.713084	-0.443485	-0.304625	-0.489674	-0.404647	-0.414261	-0.234692	-0.641539	-0.802686	-0.533829	-0.422683	-0.309527	-0.54821	-0.504162	-0.505537	-0.378188	-0.406021	-0.520752	-0.368391	-0.398564	-0.405726	-0.421356
BEX3	-0.368043	-0.73435	-0.630469	-0.758208	-0.612659	-0.531173	-1.25521	-0.145812	-0.639248	-0.770957	-0.609896	-0.699778	-0.680966	-0.417275	-0.569182	-0.495739	-0.094491	-0.383441	-0.512789	-0.207873	-0.651102	-0.741713	-0.487478	-0.283847	-0.544934	-0.688614	-0.80153	-0.815754
BEX5	0.109232	0.0383721	0.0667319	0.168568	0.177927	0.0950431	0.0361414	0.0690416	0.212994	0.0930749	0.151273	0.4323	0.128396	0.0973446	0.0987668	0.0716646	0.0802516	0.18632	0.265399	0.142384	0.158736	0.0624901	0.419666	0.117642	0.294628	0.173294	-0.0954805	0.187571
BFAR	0.282013	0.161769	0.313482	0.29433	0.406685	0.252787	0.252265	0.229569	0.218507	0.235305	0.10857	-0.13988	0.155825	-0.0861235	0.193476	0.188967	0.11769	0.228978	0.159574	0.312241	0.103512	-0.0331211	0.191512	-0.0652577	0.219069	0.000603638	-0.0698394	0.219069
BFSP2	-0.0294492	0.174954	0.0959124	0.113505	0.225212	0.162939	0.0522751	0.239949	0.100506	0.105168	0.0106254	-0.00626522	0.00706025	0.00387555	0.0261466	0.0239567	0.157996	0.0144654	-0.0848347	-0.0223501	0.130346	-0.0655706	-0.0615859	0.125316	-0.0799544	0.0740785	0.00259114	0.0494309
BGLAP	-0.816508	-1.05906	-0.794691	-1.19488	-0.876145	-0.928509	-0.974102	-0.898084	-0.872023	-0.889757	-0.940613	-0.751159	-0.950002	-0.562771	-0.606745	-0.69389	-0.946864	-0.914322	-0.938975	-0.773239	-0.99246	-0.547666	-0.717256	-0.658891	-0.639248	-0.7121	-0.86503	-0.894496
BGN	-0.306424	-0.0743534	-0.0161665	1.18373	-0.161383	0.156688	0.525595	0.630117	0.217877	0.236229	0.419886	-0.111646	0.298923	0.328831	0.271429	0.430158	0.541942	0.320856	0.414624	0.251926	0.632626	0.712588	0.423885	0.504202	0.0246064	0.262233	0.610393	0.957797
BHLHB9	-0.175683	-0.174437	-0.140694	-0.192798	-0.16986	-0.184649	-0.152063	-0.0376866	-0.12794	-0.0783252	-0.183666	-0.109026	-0.151468	-0.170694	-0.23133	-0.198854	-0.0277439	-0.150454	-0.138979	-0.0565363	-0.186485	-0.0174281	-0.143448	-0.0592848	-0.0446569	-0.0791539	-0.0907569	-0.0147195
BHLHE22	0.0729197	0.102473	0.0702133	0.112536	0.149417	0.326399	0.14826	0.0446761	0.391275	0.0127489	-0.0471868	-0.141977	0.0233434	0.189213	-0.155802	0.157291	-0.0614924	0.0938712	-0.108201	0.171049	0.206733	-0.140854	-0.20063	-0.233855	-0.0590057	-0.125036	-0.358501	-0.149395
BHLHE40-AS1	0.144892	0.151558	-0.0207229	0.251016	0.173852	0.00839893	-0.0525012	0.0653933	0.381288	0.22575	0.260157	-0.00205486	0.0315424	-0.215246	0.226029	-0.143969	0.0491478	0.0273541	-0.168694	-0.0340252	0.0355128	0.0795813	-0.0162896	-0.0298474	-0.052615	0.0500595	0.0759275	0.237376
BHLHE41	-0.216791	-0.110001	-0.184311	0.120267	-0.232478	-0.192798	0.414232	-0.108578	-0.557255	-0.0899948	-0.0288615	-0.253634	-0.33505	-0.0974738	-0.0917466	0.205131	0.211019	0.0957448	0.161072	0.0412377	0.00794075	-0.234254	-0.0263117	0.0642335	0.120176	0.434902	0.361667	0.472802
BHMT	0.101893	0.0468294	-0.0114811	0.0603801	0.0921106	0.131788	0.0960425	-0.192726	-0.0408428	0.0712543	-0.108578	-0.100999	-0.237783	-0.107601	-0.178843	-0.053443	-0.131468	-0.014467	-0.0431455	-0.105787	-0.249359	-0.0490646	-0.0217857	-0.0100587	-0.194837	-0.0845377	-0.471647	-0.23577
BHMT2	0.566301	1.09298	0.96917	0.617392	0.932352	0.847656	0.530331	0.49478	0.666636	0.971031	0.844829	0.728735	0.974229	1.23282	0.940685	1.06945	1.04549	1.24949	0.963594	1.19074	1.34521	0.967042	1.03047	1.03888	1.19534	0.945715	0.744082	0.577924
BICC1	0.111626	0.128187	0.0610923	0.104039	0.0245056	0.153222	0.115944	0.172537	0.0698436	0.0938712	-0.23285	-0.200175	0.131788	0.0846459	0.150306	0.0837692	0.178412	0.111252	-0.0452705	0.10781	-0.113341	-0.241115	-0.100149	-0.0396079	-0.0625122	-0.0897304	-0.121811	0.0635077
BICD1	-0.0784679	0.00741039	-0.0529596	-0.146945	-0.149395	-0.0263117	-0.110239	-0.120985	0.0156226	0.0300977	-0.132242	-0.0245004	-0.125104	-0.135647	-0.0845377	0.0720799	-0.00374039	-0.10392	-0.157011	-0.0136695	-0.140854	0.00664363	-0.0661051	0.123401	0.00970177	0.0689908	0.0104232	0.0534714
BICD2	-0.729078	-0.430637	-0.328936	-0.699778	-0.761462	-0.454508	-0.115132	-0.35615	-0.515459	-0.375134	-0.247051	-0.573689	-0.423768	-0.1666	-0.386017	-0.0135391	-0.245012	-0.103316	0.00532757	-0.288578	0.0477414	-0.288917	-0.00193131	-0.200862	-0.15399	-0.144727	-0.233739	-0.190455
BICDL1	0.0844094	0.0528865	0.0533452	-0.0946407	0.155825	0.000490333	0.0704039	0.10841	0.0193423	-0.0461392	-0.019936	-0.117891	-0.138435	-0.116731	-0.0308283	-0.0885213	-0.164619	-0.176599	-0.0509056	0.0170328	-0.0280116	-0.0382076	0.0684052	-0.0132384	0.0761948	0.181279	-0.0864979	-0.0182765
BICDL2	0.572429	0.331067	0.545064	0.9619	0.628301	0.320157	0.358958	0.464568	0.450255	0.5136	0.491782	0.613491	0.456671	0.550158	0.439089	0.442446	0.643694	0.588323	0.484046	0.418399	0.506153	0.427183	0.436855	0.582278	0.306201	0.443639	0.694546	0.510976
BID	-0.327528	-0.611693	-0.371663	-0.200093	-0.407005	-0.40854	-0.166091	-0.260483	-0.208779	-0.522383	-0.383167	-0.107831	-0.0128261	-0.258993	-0.375246	-0.454357	-0.222732	-0.212097	-0.41114	-0.398217	-0.206395	-0.123908	-0.168344	-0.160985	-0.201744	0.0676375	-0.146103	-0.417442
BIK	-0.0289173	0.119614	0.0572733	0.0681513	0.192869	-0.0158615	0.128256	0.0598176	0.134282	-0.0729504	0.0121728	0.000793665	0.0424221	-0.15324	-0.0447313	-0.0127616	-0.0927572	-0.0645704	-0.032832	-0.119728	-0.0608962	-0.0485186	-0.167643	0.108511	-0.0666153	-0.0954805	0.110562	0.042704
BIN2	0.59369	0.206802	0.293614	0.655833	0.576327	0.669019	0.591335	0.769477	0.444932	0.608887	0.821219	0.53555	0.509163	0.805265	0.906855	0.933857	0.847656	0.840644	0.649686	0.749612	0.657955	0.754838	0.636964	0.844829	0.69521	0.561218	0.847656	0.592435
BIN3	-0.116395	-0.0926782	-0.0774015	-0.167763	-0.190773	-0.159522	-0.0916313	-0.164467	-0.150078	-0.0411911	-0.0629488	-0.0683517	-0.025786	-0.0066013	0.109563	0.00265502	0.00990315	-0.09556	-0.0140001	-0.0991806	-0.181424	-0.165151	-0.0866356	-0.220782	0.0526189	-0.0865709	-0.133575	-0.131592
BIRC3	-0.392219	-0.193454	-0.156724	-0.360289	-0.256133	-0.245999	-0.367586	-0.268612	-0.252278	-0.475338	-0.446028	-0.210461	-0.238547	-0.369101	-0.498937	-0.462729	-0.565697	-0.526604	-0.579453	-0.510016	-0.41291	-0.412176	-0.379146	-0.584505	-0.486833	-0.473334	-0.623668	-0.356665
BIRC5	-0.642228	-0.365722	-0.590723	-0.808544	-0.52367	-0.293387	-0.661557	-0.777974	-0.324818	-0.549737	-0.59001	-0.381157	-0.395315	-0.496075	-0.539202	-0.589113	-0.618022	-0.276168	-0.359256	-0.501781	-0.654985	-0.84798	-0.910005	-0.873798	-0.850528	-0.528904	-0.839082	-0.86749
BIRC6	-0.582947	-0.611473	-0.574467	-0.618022	-0.591998	-0.668376	-0.67561	-0.544569	-0.601999	-0.520991	-0.642002	-0.57713	-0.673134	-0.574467	-0.635994	-0.686496	-0.671032	-0.629436	-0.698318	-0.770957	-0.738177	-0.633009	-0.578785	-0.738177	-0.706687	-0.69183	-0.570723	-0.663717
BIRC7	0.284039	0.714854	0.591335	0.604358	0.655833	0.554279	0.282013	0.204347	0.411321	0.395088	0.254738	0.317769	0.257724	0.204913	-0.107527	-0.0378166	0.068921	0.157105	-0.0274359	0.0424837	0.0741469	0.22664	0.245451	0.0249824	0.00362967	-0.06039	0.199535	0.209249
BIVM	0.577924	0.521316	0.631046	0.433382	0.542352	0.343708	0.24752	0.114463	0.79827	0.51237	0.548245	0.618012	0.430748	0.644784	0.202552	0.410281	0.299522	0.49092	0.235305	0.337919	0.367481	0.435136	0.293405	0.185704	0.166776	0.362333	0.37997	0.345475
BLCAP	-0.225608	-0.269687	-0.283744	-0.193297	-0.341774	-0.452414	-0.22355	-0.269255	-0.337936	-0.113462	-0.197169	-0.256133	-0.370459	0.0755277	-0.253634	-0.437567	-0.165022	-0.607649	-0.241815	-0.159522	-0.0263117	0.0499161	-0.12105	0.0241952	0.0511893	0.206668	0.0103114	-0.074147
BLK	0.040156	-0.0962519	-0.0989884	-0.200349	0.0693595	-0.207	-0.01788	-0.287217	-0.0112501	-0.0322564	-0.16162	0.0523409	-0.168694	-0.198737	0.117521	0.0921677	0.148759	0.00845873	-0.0883865	0.0051015	-0.165818	-0.10392	-0.0643105	0.0671662	-0.0243062	0.0655627	-0.15815	-0.0266237
BLM	0.0755277	0.136729	-0.10648	-0.214089	0.00764708	-0.0130079	-0.372155	-0.313881	-0.0643105	-0.0737552	-0.177936	-0.180789	-0.12217	-0.227696	-0.365568	-0.251269	-0.3813	-0.136836	-0.350678	-0.383635	-0.197243	-0.17457	-0.215137	-0.222085	-0.239884	-0.264009	-0.218262	-0.332793
BLNK	0.351342	0.487253	0.362164	0.421207	0.594767	0.451366	0.266007	0.270896	0.366874	0.159531	0.322414	0.293012	0.384243	0.0676375	0.236312	0.160751	0.0755277	0.119881	0.25055	0.121111	0.245767	0.151052	0.122942	-0.136632	0.208557	0.179315	0.0467271	-0.0538393
BLOC1S1	-0.0331211	-0.105081	0.0813391	-0.113863	0.0130206	-0.215674	-0.208469	0.103085	-0.184066	-0.387258	-0.344975	-0.504414	-0.468933	-0.343976	-0.322088	-0.246727	-0.398728	-0.386117	-0.366091	-0.148184	0.0294358	-0.264515	-0.209309	-0.374166	-0.129749	-0.405874	-0.324381	-0.316999
BLOC1S2	-0.462102	-0.140694	-0.457036	-0.176744	-0.361116	-0.359799	-0.31056	-0.695968	-0.64776	-0.424808	-0.229239	-0.262233	-0.445748	-0.616246	-0.379698	-0.2917	-0.0778	-0.343508	-0.0664231	-0.201051	-0.261939	-0.496798	-0.493283	-0.442296	-0.308444	-0.214828	-0.233098	-0.252278
BLOC1S3	-0.535565	-0.100786	-0.372465	-0.526604	-0.270525	-0.528274	-0.488897	-0.385211	-0.679053	-0.250567	-0.232761	-0.356012	-0.261939	-0.219314	-0.0851419	-0.0164636	-0.0466056	-0.147689	-0.142953	-0.185929	0.0880821	0.247638	-0.35615	-0.0987656	0.00434926	-0.513984	-0.312703	-0.120252
BLOC1S6	-0.65052	-0.562965	-1.2248	-0.843324	-0.950002	-0.879692	-0.482121	-0.552114	-1.15593	-0.953434	-0.941164	-0.621484	-0.999231	-0.397351	-0.994894	-0.806945	-0.635275	-0.512948	-0.345893	-0.455515	-0.820644	-0.837958	-0.659382	-0.708405	-0.697244	-0.736019	-0.82393	-0.880084
BLVRA	-0.126288	-0.179696	0.077787	-0.227902	-0.0280824	0.0210521	-0.0224261	0.0538072	0.234941	-0.0586393	-0.346704	0.220674	0.197676	0.148877	-0.0592049	0.0564617	0.0549234	0.113685	-0.0785218	0.0853219	0.365081	0.156387	-0.0931609	0.072729	0.429993	0.0675319	-0.133696	-0.0935151
BLVRB	-0.375374	-0.581577	-0.450557	-0.534426	-0.544783	-0.308788	-0.467035	-0.391763	-0.414698	-0.437689	-0.465434	-0.439173	-0.571153	-0.264515	-0.312165	-0.328239	-0.313048	-0.380752	-0.346704	-0.327847	-0.4906	-0.32732	-0.506251	-0.504002	-0.566555	-0.597255	-0.591117	-0.728488
BLZF1	0.102947	0.169964	0.225212	0.031281	0.147367	0.156457	0.113308	0.0226768	0.144289	0.0929721	0.154176	0.200851	0.200646	0.0074778	0.0152414	0.0784649	0.120121	0.157775	0.0651051	0.0102509	0.0576029	0.234632	-0.0174281	0.129784	0.0715399	0.189922	0.111904	0.235305
BMF	-3.23489	-3.51295	-3.62445	-3.4111	-2.53403	-3.008	-3.62445	-3.23489	-3.32245	-3.62445	-3.32245	-3.32245	-4.01535	-3.17558	-3.32245	-3.32245	-3.32245	-3.4111	-3.4111	-3.51295	-4.29584	-3.73111	-3.73111	-3.32245	-3.62445	-3.62445	-3.73111	-1.93087
BMI1	-0.34702	-0.299305	-0.207099	-0.438274	-0.309933	-0.27213	-0.354215	-0.107298	-0.345654	-0.357971	-0.208469	-0.345124	-0.438128	-0.280864	-0.277681	-0.237449	-0.0390812	-0.188715	-0.280441	-0.299899	-0.196946	-0.40258	-0.278302	-0.291417	-0.229317	-0.263896	-0.272494	-0.195932
BMP1	0.165039	0.234875	-0.042856	0.272335	0.040232	0.13853	0.131387	0.0708808	0.289733	0.225109	0.0525512	0.287714	0.455449	0.350472	0.2316	0.323863	0.324646	0.220604	0.0443499	-0.0894584	0.308521	0.167955	0.135844	0.227241	0.428599	0.216443	0.1331	-0.182693
BMP2	0.254911	-0.069393	-0.088475	-0.273073	-0.313317	-0.47007	0.00794075	-0.682936	0.0232062	-0.0551586	-0.520991	-0.0991806	-0.41977	-0.141453	0.256276	-0.572702	0.0693595	0.0323881	-0.0223501	-0.680719	-0.308894	-0.505122	-0.381024	-0.117659	-0.125036	-0.480184	-0.202474	-0.57138
BMP2K	0.0593026	-0.053443	0.0451016	0.0326051	-0.0220919	0.0128284	-0.0310296	0.153803	0.0445422	-0.0775068	-0.0494507	-0.0689445	0.051619	-0.00165887	-0.00212364	-0.0246359	0.0216784	0.0566698	-0.0540854	-0.120252	-0.00284453	-0.0619402	-0.0349331	-0.214553	0.0169182	-0.0115295	0.040232	0.0389313
BMP4	0.149638	0.0551594	0.0444132	0.0643401	0.150691	0.483527	0.0849186	0.266763	0.235375	0.294211	0.393867	0.394355	0.324497	0.279544	0.0701176	0.244137	0.157494	0.201189	0.287205	0.280626	0.0951199	0.346714	0.239133	0.375411	0.132932	0.251384	0.344506	0.2317
BMP6	-0.34659	-0.402119	-0.455804	-0.382115	-0.275181	-0.302681	-0.512948	-0.201143	-0.394615	-0.2917	-0.429647	-0.397176	-0.208683	-0.360582	-0.519799	-0.263896	-0.240405	-0.131997	-0.424916	-0.310356	-0.064754	-0.247808	-0.288264	-0.191995	-0.315575	-0.280441	-0.396055	-0.326087
BMP7-AS1	0.180351	0.352186	0.324851	-0.0473257	0.496365	0.266671	0.083019	0.0538632	-0.0981559	0.232341	0.309521	0.246502	0.0863674	0.279839	-0.0648853	0.189408	0.300807	0.132046	0.12033	-0.0295577	0.227006	0.195153	0.18795	0.232788	0.185964	0.0366455	0.377046	0.338866
BMP8A	-0.249169	-0.435624	-0.374061	-0.365983	-0.361908	-0.211205	-0.38547	-0.292836	-0.138195	-0.283633	-0.279798	-0.231745	-0.337426	-0.144727	-0.239714	-0.474484	-0.232478	-0.295031	-0.441364	-0.462244	-0.535017	-0.48096	-0.474173	-0.324266	-0.316819	-0.602258	-0.701965	-0.443034
BMPER	-0.20063	0.252787	0.162609	0.257559	0.0884241	0.410123	0.188526	-0.0639473	0.0464407	0.00582065	-0.0998724	-0.117714	0.120938	0.0240708	0.344222	0.214983	-0.113204	0.0666063	0.414052	0.0407019	0.0400997	0.177341	0.411678	-0.0333866	0.119171	0.105331	0.273112	0.242253
BMPR1A	0.126936	0.212994	0.260007	0.190413	0.0709393	-0.0128261	0.145247	0.035683	0.0845313	0.181821	0.348973	0.106934	0.167579	-0.0376246	0.0465204	0.130454	0.0584455	-0.0483168	0.0119199	0.0761948	-0.0846605	-0.0914875	-0.0409544	0.0991899	-0.2484	0.0237129	-0.103006	0.0323881
BMPR1B	-0.882257	-0.674701	-0.533464	-0.705816	-0.629832	-0.641539	-0.677787	-0.479513	-0.615898	-0.5329	-0.660741	-0.475865	-0.932034	-0.309002	-0.842514	-0.903327	-0.686223	-0.651102	-0.74434	-0.903993	-0.702311	-0.669146	-0.588167	-0.703232	-0.580697	-0.761462	-0.632041	-0.626581
BMPR2	-0.756464	-0.877936	-0.938975	-0.769134	-0.777334	-0.685426	-0.821436	-0.578951	-0.768833	-0.747551	-0.790914	-0.819044	-0.792506	-0.376959	-0.557129	-0.964666	-0.729078	-0.847151	-0.858742	-0.804212	-0.683463	-0.614589	-0.548902	-0.538363	-0.610942	-0.679053	-0.636995	-0.604668
BMS1	-0.560501	-0.453238	-0.600427	-0.632365	-0.865531	-0.674129	-0.558779	-0.622239	-0.60784	-0.444152	-0.424567	-0.53171	-0.624131	-0.572468	-0.580145	-0.414986	-0.468775	-0.574946	-0.482589	-0.482589	-0.41953	-0.383635	-0.366091	-0.270758	-0.486161	-0.344884	-0.276048	-0.467035
BMS1P21	0.0563865	0.0115276	0.304625	0.101119	0.226296	0.354492	0.0583858	0.00879511	0.11183	-0.124005	0.183231	-0.053443	0.0456431	-0.0435551	0.229745	0.265629	0.0784085	-0.0162233	0.0469427	0.136462	-0.0945489	-0.299545	0.0109455	0.485311	0.2509	0.0345668	0.100617	0.183825
BMT2	-0.0663115	0.0601007	-0.110334	0.0129445	0.18483	-0.14512	-0.0407971	-0.0960543	-0.223708	-0.171087	-0.101967	-0.037279	-0.17561	-0.246142	-0.0406629	-0.137267	-0.103484	-0.0542496	-0.132242	0.137759	-0.190773	-0.278302	-0.140368	-0.447543	-0.0394498	-0.116731	-0.287547	-0.432964
BMX	-0.0675017	-0.298738	-0.0461392	-0.027361	-0.297263	-0.361573	-0.0494507	0.059902	-0.127439	-0.185682	-0.311057	-0.0478938	0.0282656	-0.194837	-0.0351485	0.127012	-0.0561465	-0.208779	0.366393	-0.290365	-0.0974738	-0.16217	0.112206	0.012429	-0.139774	0.131575	0.18449	-0.264515
BNC2	-0.322842	-0.437271	-0.406553	-0.438767	-0.376239	-0.283006	-0.397691	-0.351854	-0.331186	-0.335175	-0.355767	-0.351037	-0.451188	-0.363873	-0.370986	-0.401587	-0.403657	-0.439173	-0.398728	-0.297821	-0.301931	-0.317254	-0.453688	-0.458344	-0.317645	-0.33996	-0.442695	-0.430806
BNIP1	0.085136	-0.0320521	0.112098	0.175105	-0.0240671	0.150363	0.0898363	0.175555	0.101218	0.0606777	0.0840273	0.0326051	-0.159205	0.12741	0.143332	0.143591	0.0845313	0.125072	0.144337	-0.00992047	0.105331	-0.0061089	0.191956	-0.0419086	0.111431	-0.113664	0.277484	0.0733803
BNIP2	-0.536553	-0.269338	-0.538167	-0.736019	-0.510532	-0.67936	-0.214639	-0.380752	-0.692366	-0.436341	-0.443219	-0.413651	-0.369364	-0.16618	-0.262879	-0.363742	-0.21129	-0.57713	-0.326418	-0.297263	-0.30394	-0.323878	-0.29719	-0.0798124	-0.0991325	-0.116154	-0.116395	-0.000610234
BNIP3	-0.598213	-1.22177	-0.883659	-0.480184	-0.528904	-0.748214	-1.60781	-1.48269	-0.641751	-1.11135	-0.696934	-0.529621	-0.750098	-0.942045	-0.726942	-0.646423	-0.0588067	-0.0626639	-0.543362	-0.447543	-0.122882	-0.638047	0.214548	-0.473723	-0.405436	-0.883659	-0.437968	-0.181865
BNIP3L	-0.475338	-0.432029	-0.344094	-0.390621	-0.40788	-0.208934	-0.547937	-0.179388	-0.503736	-0.198205	-0.39945	-0.191558	-0.561441	-0.342109	-0.421622	-0.264734	-0.34448	-0.417442	-0.362133	-0.211108	-0.365056	-0.522383	-0.286351	-0.430324	-0.669352	-0.432822	-0.558046	-0.519909
BNIPL	-0.49876	-0.46609	-0.418354	-0.383167	-0.366333	-0.321163	-0.349642	-0.27738	-0.272494	-0.345654	-0.340569	-0.484108	-0.457972	-0.379017	-0.420234	-0.605354	-0.41481	-0.578593	-0.642002	-0.584947	-0.426045	-0.370459	-0.417275	-0.411628	-0.5329	-0.574243	-0.64776	-0.425663
BOC	-0.236289	-0.376828	-0.392092	-0.268834	-0.266807	-0.242305	-0.296224	-0.155719	-0.175755	-0.234992	-0.218957	-0.213669	-0.169463	0.0304676	-0.19102	0.0184261	-0.12266	-0.287004	-0.174112	-0.186333	-0.0110035	0.0560406	-0.0541449	-0.115061	0.0160116	0.031224	0.0236672	-0.0859951
BOD1	-0.457036	-0.645528	-0.378412	-0.463794	-0.705378	-0.483775	-0.314827	-0.57744	-0.444331	-0.36468	-0.283403	-0.37111	-0.189904	-0.50773	-0.430324	-0.388859	-0.272761	-0.357351	-0.314003	-0.431257	-0.28096	-0.494625	-0.32341	0.102099	-0.34257	-0.199366	-0.147743	-0.212097
BOLA2-SMG1P6	-1.43011	-0.907239	-1.24839	-1.05308	-1.29083	-1.36239	-1.29083	-1.3159	-1.54931	-1.45923	-1.66943	-1.45732	-1.2561	-1.29221	-1.03866	-1.01571	-0.699535	-1.50541	-1.11297	-1.19554	-1.43728	-1.06657	-1.28574	-0.83676	-1.21542	-1.23044	-1.0405	-1.26756
BOLA3	-0.376689	-0.687755	-0.556882	-0.397941	-0.569866	-0.666504	-1.00425	-0.556199	-0.703505	-0.616829	-0.525875	-0.674129	-0.803829	-0.635065	-0.55521	-0.730895	-0.481808	-0.624726	-0.554281	-0.555363	-0.897185	-0.720057	-0.827852	-0.429332	-1.0012	-0.984463	-0.762414	-0.658705
BOLL	0.324646	0.263274	0.114399	0.143872	0.130817	0.182519	0.180166	0.273427	0.240989	0.230267	0.0646193	0.110896	0.178196	-0.113009	0.0649162	0.068921	0.223933	-0.108343	0.0866727	0.146345	0.120725	-0.12348	0.363972	-0.00856128	-0.0490646	-0.03265	0.235521	0.183395
BOP1	0.211725	0.229092	0.115025	-0.0808973	0.0676956	0.0804106	-0.199285	0.173086	-0.000780162	-0.186041	-0.00396192	-0.53362	0.0245056	-0.367832	-0.0104963	-0.286351	-0.234094	-0.18169	0.0476929	0.256394	0.106063	-0.0367213	0.317769	0.0199441	-0.0274963	0.171796	0.173015	0.237674
BORA	-0.0933579	-0.244099	0.0792854	-0.0481823	-0.0400299	0.00271654	-0.17145	-0.0408428	-0.0314203	-0.24721	-0.112875	-0.143736	-0.225333	-0.19016	-0.162093	-0.135246	-0.170888	-0.239714	-0.246957	0.0473715	-0.0679086	-0.194837	-0.249271	-0.198927	-0.163754	-0.0734369	-0.209008	-0.234254
BORCS6	-0.175026	-0.218349	-0.222376	-0.285957	-0.262627	-0.225971	-0.20485	-0.202531	-0.17778	-0.396055	-0.0648073	-0.131997	-0.288161	0.0192672	-0.165374	-0.220439	-0.116319	-0.209309	-0.268088	-0.0431455	-0.0685944	-0.288161	-0.271059	-0.151468	-0.217071	-0.357036	-0.330027	-0.187942
BORCS7	-0.664956	-0.69389	-0.754612	-0.850112	-0.923144	-1.21196	-1.11891	-0.714215	-0.943166	-0.841613	-1.08428	-0.904857	-1.03774	-0.988025	-0.932691	-0.999231	-0.942045	-0.755139	-1.00177	-1.12055	-1.15215	-0.984463	-1.0922	-1.17565	-1.21732	-1.04354	-0.562507	-1.06593
BORCS8-MEF2B	-2.42777	-2.40208	-2.3363	-2.13483	-2.28638	-2.25083	-1.79834	-2.38713	-2.22224	-2.38713	-2.02436	-2.42777	-2.30111	-2.49602	-2.25083	-2.43928	-1.77087	-2.27898	-2.34857	-2.26418	-2.24187	-2.49602	-2.30111	-2.00321	-2.38713	-2.14361	-2.34857	-1.59614
BPESC1	0.224068	0.172579	0.368127	0.11553	0.117928	0.354603	0.539271	0.116643	0.25698	0.195513	0.31541	0.429617	0.387552	0.314512	0.0981068	0.332133	0.309445	0.266855	0.307902	0.209744	0.092805	0.261964	0.0956394	0.189706	0.158067	0.199911	-0.0496243	0.361892
BPGM	-0.0910861	-0.128789	-0.10889	-0.15809	-0.119564	-0.081534	-0.0478194	0.0440502	-0.0894584	-0.184311	-0.209404	-0.168061	-0.0808973	-0.14078	-0.0807665	-0.226218	-0.195932	-0.0402819	-0.28556	0.0577127	-0.0460729	-0.239639	-0.0146085	-0.159984	-0.2699	-0.145293	-0.171144	0.046266
BPHL	0.353715	0.318476	0.0699124	0.542352	0.386004	0.535872	0.55646	0.286324	0.506153	0.241719	0.533146	0.18795	0.329364	0.531494	0.311411	0.539608	0.52602	0.473306	0.494047	0.305314	0.449279	0.407689	0.327986	0.153731	0.180032	0.329867	0.227785	0.484798
BPI	-0.259424	-0.0813627	-0.00593249	-0.0738124	-0.09556	-0.0483168	-0.0304836	0.202418	-0.208853	-0.169075	-0.0708429	-0.0853159	-0.204172	-0.112791	-0.307352	-0.0723797	-0.15809	-0.175755	0.100851	0.190835	-0.0168554	-0.268701	-0.218548	-0.106899	-0.100225	-0.0491988	-0.0911576	0.0632467
BPIFA1	0.026009	0.111135	0.243168	0.0198884	0.0282656	0.059902	-0.0409544	0.0184932	-0.0795842	-0.0238298	-0.0664658	0.0397001	-0.13629	-0.0732976	-0.0772556	-0.170947	-0.241815	-0.0683517	0.259537	-0.23364	-0.0116435	-0.169561	-0.110974	-0.214639	-0.194005	-0.176059	-0.187712	-0.293101
BPIFA3	0.37197	0.364708	0.467841	0.457269	0.258914	0.190132	0.701047	0.0346722	0.327686	0.371069	0.154356	0.438651	0.525298	0.248478	0.23877	0.356041	0.176811	0.00706025	0.339592	0.257096	0.294024	0.25739	0.321853	0.51237	-0.0635344	0.380388	0.320658	0.355497
BPIFB1	0.286023	0.194087	0.311036	0.309047	0.16766	0.159807	0.291796	0.417904	0.0325395	0.165759	0.0800756	0.0551594	0.191956	-0.057584	0.115393	0.0973446	0.043772	-0.0923995	-0.0707662	0.195853	0.150424	-0.449399	0.15362	-0.025291	-0.0529596	-0.124591	0.0389313	0.043495
BPIFB2	-0.021212	-0.176681	-0.291504	-0.351448	-0.100023	-0.269122	-0.482285	-0.392341	-0.397691	-0.420234	-0.194547	-0.323636	-0.264822	-0.220543	-0.436697	-0.241413	-0.403269	-0.199147	-0.403657	-0.317254	-0.260966	-0.284503	-0.0427795	-0.151991	-0.0694573	0.0191972	-0.345417	-0.387001
BPNT1	-0.6043	-0.613572	-0.543362	-0.651102	-0.289935	-0.560501	-0.303025	-0.866577	-0.391912	-0.334653	-0.17457	-0.296224	-0.27646	-0.379576	-0.602258	-0.774984	-0.566359	-0.530023	-0.609558	-0.669352	-0.762131	-0.772439	-0.669146	-0.825503	-0.593741	-0.869483	-0.89327	-0.782371
BPTF	-0.0721777	0.0204211	0.00615772	-0.122531	0.081034	0.0104865	-0.0243632	-0.184311	0.0350308	0.0811997	-0.0159772	0.046206	0.0604246	-0.0675737	0.120619	0.0645379	0.0937638	0.0760404	0.138479	0.0232062	0.0767645	0.121863	-0.108416	0.0570475	0.0815666	0.0544078	-0.0242477	-0.0317335
BRAF	-0.714977	-0.368043	-0.411478	-0.407975	-0.443219	-0.474653	-0.517804	-0.205226	-0.42246	-0.415485	-0.440506	-0.282881	-0.3528	-0.486693	-0.381684	-0.522005	-0.442695	-0.477095	-0.44893	-0.519112	-0.332517	-0.259217	-0.244747	-0.340991	-0.307445	-0.278092	-0.198288	-0.363981
BRAP	-0.737014	-0.634612	-0.604487	0.131901	-0.56615	-0.933155	-0.37467	-0.711791	-0.397834	-0.879233	-0.804574	-0.684885	-0.326968	-0.539841	-0.473723	-0.739907	-0.167643	-0.458667	-0.378723	-0.609689	-0.46329	-0.245233	-0.773569	-0.252479	-0.465106	-0.533829	-0.311057	-0.403506
BRAT1	-0.20408	-0.140053	-0.0965489	0.0392551	-0.0786629	-0.0634367	-0.0413955	-0.0877647	-0.121393	-0.114843	-0.038572	0.0449014	-0.0985637	-0.129278	0.0563063	-0.0710153	-0.270758	0.0977558	-0.051597	-0.0801077	-0.197952	-0.188566	-0.173968	0.0123382	0.114399	0.0485347	-0.0405047	0.0154995
BRCA2	-0.708739	-0.807381	-0.997865	-0.924255	-0.752037	-0.935398	-0.962176	-0.99594	-0.910603	-1.19012	-0.957753	-0.827065	-0.867079	-0.768833	-0.628679	-0.740241	-0.874665	-0.783893	-0.897185	-0.626795	-0.745343	-0.697244	-0.767997	-0.533464	-0.716463	-0.526415	-0.850112	-0.900243
BRCC3	-0.38547	-0.22908	-0.627739	-0.638518	-0.50961	-0.726942	-0.00770055	-0.808238	-0.538568	-0.4906	-0.243086	-0.709494	-0.228992	-0.570302	-0.51467	-0.637235	-0.726243	-0.525638	-0.449549	-0.883659	-0.487581	-0.337426	-0.471303	-0.523452	-0.663717	-0.482708	-0.47007	-0.689911
BRD2	0.715703	0.470626	0.520153	0.631415	0.597824	0.610393	0.73816	0.636964	0.642661	0.503857	0.657955	0.702565	0.643694	0.517081	0.544525	0.434311	0.398934	0.382579	0.387552	0.41526	0.342773	0.385108	0.51597	0.776376	0.630117	0.655833	0.497598	0.446656
BRD3	-0.312594	-0.481808	-0.544783	-0.37257	-0.379576	-0.234326	-0.376545	-0.310057	-0.352917	-0.410686	-0.313048	-0.348268	-0.263785	-0.232478	-0.184066	-0.263471	-0.180655	-0.167392	-0.122944	-0.139287	-0.199084	-0.250969	0.0252313	-0.171223	-0.176599	-0.285337	-0.236191	-0.0710153
BRD4	0.0194214	0.131788	-0.0646196	0.200228	-0.0027269	0.0891712	0.0635641	0.255705	0.297336	0.273112	0.264117	0.31765	0.20291	0.387428	0.28821	0.220149	0.391407	0.436855	0.478443	0.208855	0.358509	0.0730764	0.262816	0.133678	0.471625	0.59277	-0.00396192	0.35509
BRD7	-0.562965	-0.828692	-0.748965	-0.665265	-1.05235	-0.845015	-0.70255	-0.566359	-0.679688	-0.703873	-0.547937	-0.660741	-0.695403	-0.814509	-0.567887	-0.305514	-0.573174	-0.235209	-0.485971	-0.353042	-0.499548	-0.633814	-0.509795	-0.455652	-0.297482	-0.381684	-0.405436	-0.421622
BRD8	-0.465656	-0.517628	-0.408152	-0.451509	-0.336599	-0.351037	-0.461476	-0.432401	-0.465434	-0.602258	-0.443851	-0.424256	-0.547477	-0.494625	-0.477095	-0.53362	-0.514274	-0.543601	-0.558933	-0.649807	-0.634018	-0.576766	-0.659883	-0.614103	-0.684588	-0.620056	-0.762131	-0.628012
BRDT	0.00970177	0.0732637	0.0729197	-0.0125338	0.0365322	0.163216	-0.0198098	-0.0488188	-0.0296155	-0.149455	0.0269676	-0.034151	-0.0135391	0.072729	0.0230878	-0.123566	-0.104346	-0.0878914	-0.0639473	0.0141797	-0.267981	0.0930247	-0.00500874	-0.0296155	-0.0298474	0.0186812	-0.112533	-0.0483168
BRE	-0.112296	-0.0997175	-0.0541449	-0.0500224	-0.00556143	-0.0200031	0.00851364	-0.0302034	-0.000888192	-0.0903175	-0.0709608	-0.0744892	-0.09777	-0.00992047	0.031281	-0.0277849	0.0203661	-0.0665366	-0.0266742	-0.0115869	-0.027936	-0.00770055	-0.0600068	-0.0417281	-0.14419	-0.0710153	0.0160116	-0.0554908
BRI3	0.0985799	0.0561894	0.51291	0.197477	0.180032	0.157179	0.254822	0.101544	0.336632	0.18663	0.313716	0.139494	0.138648	0.342258	-0.0186491	0.158529	0.199072	0.0138704	0.126809	0.0384899	0.234118	0.319923	0.0249824	0.215618	0.18788	0.32735	0.0439915	0.159115
BRINP1	-0.257615	0.246293	0.09222	0.0590546	0.0520356	0.129992	-0.208044	-0.0596814	0.214383	0.122725	0.218652	0.089896	0.0225184	0.0283078	0.0281423	0.0636877	0.0179158	-0.0755918	0.112051	0.203522	-0.130007	0.0800756	0.130056	-0.0950095	-0.107677	0.196869	-0.0467875	0.141867
BRINP2	-0.121527	-0.259153	-0.495558	-0.132793	-0.243909	-0.264972	-0.257308	-0.325199	-0.306658	-0.291848	-0.0877647	-0.385332	-0.229317	-0.0380072	-0.13014	-0.0980987	-0.223171	-0.168694	-0.0958479	-0.17593	-0.0553763	-0.051597	0.0242493	-0.00522891	0.0201375	-0.149222	0.117232	-0.0267199
BRINP3	0.00362967	0.000907551	-0.0364031	-0.0135391	-0.130276	-0.106197	-0.142585	0.23686	-0.0821644	-0.132156	-0.245012	-0.0993253	-0.053513	-0.119477	-0.126755	-0.053707	-0.256133	-0.17457	-0.152516	0.0404723	0.0979972	0.0674655	-0.0721777	-0.178708	-0.0604478	0.0989984	-0.0592049	-0.118125
BRIP1	-1.10502	0.209069	0.13493	0.315524	-0.552535	-1.09012	-0.932034	-1.35351	-1.24414	-0.929817	-1.53791	-1.27729	-1.22921	-0.131468	-1.31715	-1.58652	-1.44121	-1.58309	-1.34233	-1.67205	-1.20562	-1.33196	-1.53342	-1.5546	-1.20872	-1.21542	-1.10104	-1.3724
BRK1	0.090713	0.12931	0.277858	0.294849	0.366625	0.159872	0.0234768	0.101498	0.0186346	0.0828459	0.000603638	0.0661472	0.0219831	-0.176282	-0.188463	-0.173968	-0.0338426	-0.10648	-0.262444	-0.231972	-0.0330009	-0.032832	-0.0675017	0.0122363	-0.113088	0.039988	-0.135959	-0.0957942
BRMS1	0.168414	-0.053513	0.0863674	0.0581989	0.0106754	0.0340807	0.123639	0.144225	-0.00134609	0.298686	0.202418	0.159054	0.269841	0.21694	0.274853	0.0641161	0.132585	0.0808399	0.21334	0.175409	0.101616	0.159952	0.0805172	-0.0332743	0.21167	0.249699	0.56817	0.290074
BRMS1L	0.265318	0.25671	0.141867	0.154818	0.0837692	0.0647409	0.151619	0.284693	0.179834	0.0790591	0.22751	0.185964	0.154927	0.0888562	0.0209638	0.016842	0.0772547	0.213432	0.150807	-0.111177	0.116589	-0.0180883	0.00845873	-0.0136695	0.0247987	0.147498	0.242415	0.246833
BROX	-0.484302	-0.555595	-0.561178	-0.505684	-0.995414	-0.693233	-0.53539	-0.705183	-0.430948	-0.346704	-0.543828	-0.611473	-0.381684	-0.267884	-0.429156	-0.497007	-0.2917	-0.394474	-0.339726	-0.191558	-0.211373	-0.513984	-0.350243	-0.108343	-0.4906	-0.396055	-0.393088	-0.229239
BRPF1	-0.311298	-0.18474	-0.0496243	-0.023583	-0.296985	-0.220239	-0.167479	-0.178964	-0.0362158	0.022736	0.0450171	-0.0736826	-0.0883039	-0.15809	-0.119728	-0.174753	-0.251334	-0.026047	-0.182882	-0.165022	-0.0882192	-0.0609452	-0.0217372	-0.196625	-0.228992	-0.0295112	-0.0710686	0.100298
BRPF3	0.0341468	0.0951705	-0.0544692	0.0940134	-0.0128837	-0.0738865	-0.000610234	-0.143292	0.0477854	0.00879511	0.0607938	0.0368137	-0.040733	0.0450171	-0.173293	0.0862973	-0.0628668	-0.038423	0.1194	0.24071	0.0202351	0.0428692	0.00369691	-0.0812265	0.0459894	0.0254499	0.022736	-0.0317992
BRS3	0.0200011	-0.0824668	0.232011	0.159054	0.115083	0.0995981	-0.0361401	0.17874	-0.00529317	0.0146308	0.283539	0.195357	-0.0690795	0.0788235	-0.00144274	0.044807	0.0200011	0.048943	0.0857202	0.318587	0.137811	0.118299	0.0917749	0.253437	0.0339665	-0.0836153	0.078611	-0.155237
BRSK1	0.0327325	-0.145879	-0.209008	-0.142346	-0.155615	0.00615772	0.155162	0.00561545	-0.0245688	-0.157348	-0.0719216	-0.138435	0.148759	0.291038	-0.188146	0.0585668	0.172103	-0.275946	-0.137599	0.280045	0.111431	0.131503	0.149638	0.0389981	0.106494	-0.0847819	0.10345	-0.240078
BRWD1	-0.051412	0.00770975	0.0360133	-0.0235227	-0.0337857	-0.090259	-0.0756777	0.0453726	-0.0562077	-0.0460729	0.0140472	-0.142434	-0.0946922	-0.100295	0.0841329	-0.0797695	-0.111876	-0.0984086	-0.056604	-0.0943355	-0.117162	-0.116952	-0.178222	-0.0995178	-0.204598	-0.172836	-0.0105638	-0.176204
BRWD1-IT2	-0.637489	-0.646423	-0.941164	-0.767022	-0.329656	-0.646098	-0.759166	-0.538167	-0.849138	-0.818608	-0.879233	-0.664066	-0.641296	-0.174026	-0.524848	-0.558587	-0.812967	-0.788918	-1.01194	-0.545696	-1.10424	-0.547089	-0.810719	-0.770672	-0.595007	-0.644226	-0.634612	-0.804212
BRWD3	-0.0299313	-0.0112501	-0.0274963	-0.00916207	0.00504268	0.145077	0.0362512	0.128762	0.0699124	0.0222052	-0.00669244	-0.0287351	-0.0435551	0.141135	0.0316602	0.188393	-0.0810488	0.044807	0.0100255	0.038742	0.07429	-0.0963137	0.0441018	0.0473715	0.0234768	-0.200862	0.00963773	-0.044387
BSCL2	-0.165818	-0.212701	-0.280441	-0.221138	-0.410114	-0.514832	-0.194547	-0.37257	-0.472581	-0.322601	-0.42444	-0.601482	-0.202397	-0.866086	-0.711416	-0.542986	-0.407975	-0.707827	-0.613104	-0.379698	-0.454357	-0.332517	-0.888175	-0.3867	-0.193366	-0.280691	-0.213749	-0.381157
BSG	0.21568	0.136268	-0.0523797	0.130817	0.151418	0.0991899	0.243928	0.133948	0.00722858	0.206668	0.0792193	0.17962	-0.00500874	0.106002	0.0845313	0.105901	0.0602231	0.00285215	0.0646867	0.0766038	0.180032	0.141867	0.10781	0.212763	0.00487875	0.104265	0.0300316	0.118478
BSND	0.268619	0.344918	0.342171	0.185286	0.333441	0.182584	0.221632	-0.0689445	0.319783	-0.0612741	0.348417	0.15269	0.262537	-0.140296	-0.116888	0.329737	0.160687	-0.150078	0.469549	0.260483	0.333864	0.134877	0.195068	0.15771	0.121575	0.33141	0.0915574	0.359897
BSPRY	0.166096	0.336279	0.322946	0.360385	0.554279	0.425077	0.321968	0.171416	0.269062	0.301322	0.185964	0.224808	0.172865	0.197329	0.255001	0.154553	0.108124	0.172928	0.319783	0.283539	0.247823	0.178074	0.216595	0.139269	0.192869	0.20383	0.23108	0.08596
BST1	0.218967	0.318273	0.152472	0.130454	0.0200011	0.158314	0.0738849	0.27184	0.418949	0.294764	0.235675	0.317424	0.411163	0.244624	0.302616	0.15676	0.257724	0.0119199	0.147454	0.0691065	0.203365	0.407909	0.14029	0.337559	0.291477	0.188913	0.269336	0.408517
BST2	0.256178	0.187624	0.344101	0.141062	0.190189	0.530954	0.387552	0.403501	0.367849	0.377757	0.245617	0.602721	0.207905	0.485756	0.132982	0.324953	0.260007	0.214165	0.288102	0.449279	0.0739461	0.0799597	0.223933	0.243805	0.0651623	0.230095	0.197329	0.076659
BTBD1	-0.526604	-0.429805	-0.613104	-0.425799	-0.227902	-0.744686	-0.720483	-0.346486	-0.968261	-0.357277	-1.03388	-0.372042	-0.47934	-0.485137	-0.744686	-0.920744	-0.581805	-0.463652	-0.386821	-0.538776	-0.812967	-0.595276	-0.743701	-0.134648	-0.802686	-0.714215	-0.173968	-0.101752
BTBD2	-0.1191	-0.171087	-0.164545	-0.139084	-0.230394	-0.213156	0.615536	0.0636122	-0.195147	-0.328936	-0.00284453	-0.364968	0.00633002	-0.0337271	-0.286444	-0.328936	-0.0364031	-0.0606016	0.205809	-0.0829882	-0.0998724	-0.14512	-0.0841885	-0.245233	-0.189978	-0.0317992	0.0574725	-0.0529596
BTBD3	-0.110239	0.182119	0.0169754	-0.165151	-0.0866356	-0.0168098	0.213746	0.0757317	0.169822	0.110606	0.0459308	0.0917252	0.0797302	0.0016807	0.124391	0.110138	-0.157597	-0.00977757	0.00522726	0.163603	-0.022547	0.154234	-0.349078	-0.00451104	0.127343	0.00319944	0.0272325	0.115343
BTBD6	0.106934	0.0538072	0.065212	0.117159	-0.109942	0.279544	-0.0605572	0.11009	0.0883264	0.115652	0.0768227	0.299911	0.204576	0.34591	0.235455	0.19223	0.232961	0.215249	0.0912775	0.245617	0.281515	0.148582	-0.0340252	-0.0262657	0.149638	0.215333	0.00532757	0.0899541
BTBD7	0.509437	0.540757	0.336408	0.0451646	0.348129	0.0413911	0.543369	0.21621	0.47763	0.595098	0.44841	0.469549	0.49092	0.502255	0.201053	0.37997	0.405395	0.577924	0.370445	0.423081	0.566301	0.584913	0.495802	0.360947	0.504202	0.674411	0.526277	0.493469
BTBD9	0.101754	0.172405	0.162335	0.133203	0.117521	0.111372	0.139566	0.181199	0.147687	0.190002	0.0812506	0.207905	0.131452	0.147062	0.305179	0.128563	0.145247	0.118148	0.213281	0.163051	0.162403	0.190835	0.170756	0.264445	0.177207	0.0307822	0.0583858	0.0963162
BTC	-0.192467	-0.27996	-0.37805	-0.036815	-0.364366	-0.429521	-0.392815	-0.437567	-0.495739	-0.491515	-0.27196	-0.240492	-0.34474	-0.36225	-0.327411	-0.502742	-0.264734	-0.328239	0.0147406	0.0855829	-0.34257	0.00129976	-0.429647	-0.425415	-0.328332	-0.365722	-0.291504	-0.396308
BTD	-0.494122	-0.153028	-0.12429	-0.360687	-0.226321	-0.605354	-0.338054	-0.339432	-0.656676	-0.50304	-0.175083	-0.611188	-0.556603	-0.555363	-0.1314	-0.37181	-0.120923	0.0407644	-0.0726117	-0.559217	-0.550272	-0.419383	-0.561441	-0.461476	-0.0505857	0.0982711	-0.181154	-0.268929
BTF3	-0.188362	-0.0947575	-0.131919	-0.236677	-0.17052	-0.0611393	-0.164946	-0.192963	-0.0499521	0.0602842	-0.0759571	0.140466	-0.104634	-0.166737	-0.304909	-0.0718608	-0.193875	0.143	-0.038572	-0.0518263	0.0825595	0.0433733	-0.0988894	0.0877657	-0.250353	0.365597	0.129113	0.132932
BTF3L4	-0.37467	-0.495416	-0.541742	-0.424256	-0.615504	-0.483546	-0.365568	-0.578785	-0.485484	-0.46329	-0.413651	-0.417144	-0.485484	-0.672208	-0.426597	-0.670777	-0.439488	-0.433123	-0.267528	-0.322362	-0.448769	-0.535017	-0.439791	-0.379259	-0.762768	-0.364366	-0.387258	-0.580517
BTG1	-0.458155	0.101434	-0.0572828	-0.287765	-0.309635	-0.423646	-0.140446	0.178337	-0.265643	0.18788	-0.201455	-0.146857	-0.0961692	-0.236677	0.101338	-0.174026	-0.0517058	0.00885871	0.325891	-0.210273	0.141197	0.160223	0.103085	0.00902956	-0.0540232	-0.278003	-0.498937	0.247734
BTG2	1.03888	1.33417	0.638877	0.677256	1.49799	0.188325	3.12383	2.80393	1.2978	1.87244	-0.0132384	0.0770633	0.959932	0.794971	2.13133	0.0333509	0.901403	0.644165	1.10166	0.671656	0.652859	0.439256	0.524478	0.0287657	0.820079	0.652091	0.256906	0.899448
BTG3	-0.684588	-0.663174	-0.635275	-0.836299	-0.707556	-0.727587	-0.3867	-0.449399	-0.625886	-0.890227	-0.761151	-0.881845	-0.489807	-0.847565	-0.854141	-0.788139	-0.824705	-0.795999	-0.618842	-0.543601	-0.757158	-0.945399	-0.665508	-0.772884	-0.62925	-0.716043	-0.704887	-0.502327
BTG4	0.245861	0.123066	0.161692	0.163006	0.258995	0.0990478	0.159456	0.291683	0.101544	0.239419	0.228036	0.228036	0.0873645	0.182958	0.256102	0.17421	0.107112	-0.125751	0.107211	0.0572733	0.0944384	0.122677	0.0186812	0.0172913	0.0534714	-0.000243052	0.116136	0.146875
BTK	0.148125	0.269752	0.232449	0.15625	0.141768	0.1306	0.063999	0.0422982	0.25969	0.256801	0.0192672	0.404961	0.220149	0.0796715	0.376572	-0.037492	-0.0785922	-0.164619	-0.339574	-0.164866	0.209823	0.46324	0.161846	0.00956181	0.195781	0.345624	0.163424	0.169964
BTLA	0.220149	0.168778	0.259232	0.0993781	0.0653324	0.103636	0.0868587	0.233901	0.144163	-0.103251	0.205131	0.11216	0.138138	0.137706	0.0325395	0.00845873	0.27204	0.191728	-0.00247066	-0.105733	-0.00860986	0.0185357	-0.0552422	-0.197889	0.233115	0.113505	0.111181	0.14839
BTN1A1	0.579778	0.256029	0.531494	0.380741	0.392716	0.737274	0.4843	0.48203	0.382745	0.505606	0.373088	0.37997	0.259232	0.458438	0.409461	0.465952	0.284125	0.267035	0.426434	0.396316	0.473306	0.417731	0.451366	0.448909	0.657234	0.361515	0.496897	0.270019
BTN2A1	0.0289735	0.236774	0.0953478	0.0822515	0.150187	0.034035	0.0328548	0.14782	0.145891	0.201189	0.0643401	0.165226	0.144604	0.0719362	0.00357065	0.0188129	0.0144107	-0.0824668	0.0413366	-0.0149747	0.127995	0.0294358	0.114163	0.0754804	0.241115	0.0368789	0.00383844	-0.16626
BTN3A1	-0.0483168	0.0339665	-0.0224956	-0.0959197	0.155614	-0.0979607	-0.243524	-0.0774544	-0.131191	-0.260132	-0.135246	-0.144279	-0.0794804	0.0707716	-0.186414	-0.233855	-0.0189592	-0.282881	-0.314387	-0.263896	-0.00265573	0.0358587	-0.265522	-0.13076	0.124621	-0.286157	-0.047511	-0.00306713
BTNL8	-0.0726733	0.257504	0.0129445	0.156598	0.0651051	0.100115	0.250171	0.111904	0.0305362	0.206871	0.29493	0.196743	0.135341	0.246654	0.0674655	0.194406	-0.0691492	-0.123102	0.0978996	-0.288264	0.0940134	0.0219831	0.244448	-0.0975581	-0.274133	0.223485	0.119277	0.323047
BTNL9	-0.0183402	-0.0350067	-0.214828	-0.0501875	-0.218875	-0.186639	-0.368664	-0.233007	-0.0648853	0.0120396	-0.235694	-0.152969	-0.166525	-0.0668621	-0.264176	-0.0410277	-0.0237677	-0.0456856	-0.163153	-0.192175	-0.00341048	0.00335144	0.0272325	0.0148632	-0.0360929	0.0559855	0.0815153	-0.123102
BTRC	0.000793665	-0.0382076	0.0214107	0.0894122	-0.00318453	0.0854861	0.070028	-0.0313523	0.133049	0.00406591	0.149872	0.309521	0.0947402	0.157996	0.209744	0.309242	0.295347	0.172579	0.25209	0.441668	0.370936	0.369391	0.125188	0.318052	0.292122	0.366393	0.360385	0.160074
BUB1	-0.520752	-0.53713	-0.674701	-0.821436	-0.606745	-0.790033	-2.04039	-0.903327	-1.08428	-1.16955	-1.54102	-1.03506	-0.800487	-1.53037	-0.867079	-0.846392	-1.68994	-1.14377	-1.33621	-1.45112	-1.39239	-1.29367	-1.24749	-1.61976	-1.64042	-1.50541	-1.18193	-2.15883
BUB1B	-3.32245	-3.4111	-3.23489	-2.95015	-2.89262	-3.23489	-3.4111	-3.4111	-3.008	-3.32245	-3.62445	-3.05564	-3.05564	-3.32245	-3.4111	-3.51295	-3.23489	-3.05564	-3.51295	-1.73743	-3.11681	-3.32245	-2.84873	-3.11681	-2.81048	-3.11681	-3.008	-4.41114
BUB3	-0.797445	-1.06708	-1.27564	-0.357155	-0.281755	-0.573369	-0.598496	-0.974102	-0.789222	-0.912144	-0.831419	-0.745343	-0.687755	-0.488897	-0.953434	-0.939522	-1.02618	-0.890227	-0.779913	-0.945399	-1.35351	-0.594779	-0.992003	-0.502151	-0.660542	-0.778762	-0.726578	-1.13005
BUD13	-0.922579	-0.784633	-0.783893	-1.04825	-0.961698	-0.842889	-0.876145	-0.886794	-0.630069	-0.548455	-0.862771	-0.792506	-0.759781	-0.534841	-0.765821	-0.897185	-0.638761	-0.552114	-0.623531	-0.812607	-0.589113	-0.57744	-0.644719	-0.920744	-0.57795	-0.352221	-0.412464	-0.349232
BVES	-0.238656	-0.171223	-0.0705004	-0.174501	-0.2255	-0.102613	-0.216148	-0.308091	-0.207	-0.138504	-0.177847	-0.364256	-0.127103	-0.135161	-0.581577	-0.309527	-0.352221	-0.301823	-0.325073	-0.31581	-0.102849	-0.215417	-0.0246916	-0.423646	-0.255351	-0.42255	-0.480659	-0.283403
BVES-AS1	-0.0551586	0.204097	0.199535	0.21621	0.380264	0.0666761	-0.0641033	0.234632	0.246362	0.144337	0.0841329	0.0556478	0.215333	0.00790039	0.221849	0.0372366	0.104427	0.0305362	0.277362	0.0688738	0.0559855	-0.090958	-0.0473997	0.350019	0.174468	0.228036	0.0297091	-0.00422464
BYSL	-0.924713	-0.87696	-1.0891	-0.931517	-0.760435	-0.914322	-0.985519	-0.70255	-0.917245	-0.717524	-0.700586	-0.783618	-0.784289	-0.579874	-0.510872	-0.556199	-0.662402	-0.344975	-0.459097	-0.52759	-0.533829	-0.448079	-0.452755	-0.470692	-0.272238	-0.708931	-0.428401	-0.390324
BZW1	-2.69658	-2.13483	-2.43928	-2.42777	-2.27898	-2.22224	-1.54291	-2.28638	-2.67263	-2.23118	-2.20219	-2.40208	-2.27898	-2.42777	-2.07503	-2.09894	-2.42777	-2.19467	-1.48269	-2.28638	-2.41859	-2.24187	-2.34857	-2.13483	-2.28638	-2.40208	-2.53403	-2.46375
BZW2	0.129495	0.0697974	-0.123102	-0.10036	0.046206	0.01718	0.228676	-0.157263	0.290357	0.0983914	0.284039	0.208557	0.11183	0.400733	0.278501	0.355367	0.27074	0.258155	0.485541	0.276497	0.123004	0.155162	0.233827	0.403803	0.257504	0.409622	0.393471	0.201117
C10orf10	0.180222	0.278892	0.582278	0.304075	0.302879	0.295555	0.667945	0.874943	0.551609	0.353845	0.398138	0.499671	0.541942	0.574221	0.655833	0.39861	0.720385	0.395088	0.481577	0.522497	0.733964	0.521644	0.747523	0.398934	0.700398	0.345475	-0.0411402	0.523701
C10orf107	-0.784289	-0.480659	-0.673134	-0.748436	-0.757158	-0.595276	-0.750741	-0.810042	-0.694318	-0.489338	-0.610699	-0.557645	-0.474484	-1.19012	-0.727587	-0.580517	-0.590279	-0.236773	-0.578951	-0.680966	-0.672001	-0.566555	-0.664956	-0.934463	-0.649137	-0.402899	-0.7638	-0.527217
C10orf11	0.0982711	0.090124	0.137425	0.161846	0.217168	0.153679	0.133783	0.408517	0.090713	0.309521	0.114594	0.237225	0.122777	0.288394	0.0824323	0.0986633	0.136025	0.2452	0.182519	-0.00426882	0.208727	0.248316	0.240989	0.255001	0.166712	0.17421	0.268619	0.166299
C10orf113	0.00252802	-0.0482539	-0.0910861	-0.0684217	-0.0719216	-0.0723013	-0.140296	0.0280346	-0.13836	-0.167966	0.0791534	-0.0843711	-0.0202445	0.0825124	0.0646193	-0.112109	0.118904	-0.0917466	-0.0939847	0.0764815	0.225535	0.130947	0.140504	0.129372	-0.00451104	-0.0156335	0.0912775	0.126669
C10orf12	1.25561	1.21694	1.24949	1.03648	1.05531	1.3392	1.24594	0.88743	1.25561	1.40681	1.06526	1.13171	1.05251	1.204	0.755902	0.917605	1.04289	0.945715	0.971031	0.972612	0.762639	0.79827	0.808724	0.806561	0.81886	0.893406	0.533461	0.783536
C10orf25	0.053101	-0.0946407	-0.0910203	0.0271566	0.118672	0.0674032	0.01605	0.285391	0.0773689	-0.050644	-0.0572828	-0.155477	-0.06039	-0.0608176	-0.0479622	0.00383844	0.142191	-0.148496	0.0552059	-0.00318453	-0.0766675	-0.0788415	0.150134	-0.13629	-0.106261	-0.0645704	0.234296	0.11553
C10orf35	-0.0956278	0.0421889	0.0472935	-0.00226165	-0.0135391	-0.116731	-0.430488	-0.0749239	-0.0596814	0.0584455	0.238911	0.151835	0.034035	-0.230394	0.0695893	-0.0979607	-0.109653	-0.0138098	-0.0953971	0.114463	-0.169463	-0.318266	0.102099	-0.0390112	-0.240299	-0.362727	-0.301234	-0.11523
C10orf53	0.0730299	0.164908	-0.0439121	-0.00935423	0.071124	0.0507065	-0.157157	0.102996	-0.033533	-0.0109529	-0.0261605	-0.0432936	0.0159541	0.0319013	0.248633	0.187571	-0.0802982	0.0353791	-0.205301	0.0467789	-0.0218504	-0.0138098	0.0229448	0.15965	-0.10075	-0.0498341	0.0163631	0.10996
C10orf54	0.692436	0.488338	0.381481	0.801807	0.870337	0.570861	0.735235	0.346714	0.494302	0.778295	0.688973	0.64825	0.806561	0.783536	0.875899	0.694546	0.770497	0.630117	0.569999	0.682871	0.75976	0.723142	0.947932	0.740316	0.750454	0.767098	0.672265	0.673798
C10orf55	0.257643	0.0835055	0.0971115	0.151619	-0.0277849	0.374441	0.300396	0.108363	0.0695893	0.234632	0.0961896	0.110338	0.0289178	0.147687	0.197815	0.154046	0.0993152	0.0548591	0.111904	0.0519655	0.0120396	-0.00935423	0.145717	0.0738849	0.175555	0.0503649	0.0979972	0.0773689
C10orf62	-0.57713	-0.614589	-0.321515	-0.470692	-0.489993	-0.568499	-0.54634	-0.458155	-0.654009	-0.590279	-0.376239	-0.598744	-0.441654	-0.544934	-0.563723	-0.469913	-0.41114	-0.413955	-0.424256	-0.401187	-0.40882	-0.526886	-0.354816	-0.380264	-0.663408	-0.46395	-0.605143	-0.457416
C10orf76	0.0662704	-0.114311	-0.261135	-0.171144	-0.0784679	0.0706197	-0.246067	-0.263896	-0.0317992	-0.16876	-0.11523	-0.118427	0.0108866	0.0728492	-0.132305	-0.182546	-0.132305	0.150239	-0.0388496	-0.11557	0.055472	0.264597	-0.0047315	-0.0734369	0.150187	0.0796715	-0.0666153	0.0240708
C10orf82	0.336122	0.381802	0.190835	0.38493	0.270019	0.423885	0.296415	0.526277	-0.222276	0.405538	0.258155	0.304625	0.242253	0.380264	0.0648033	-0.155802	0.246833	0.105229	-0.0823946	0.347188	0.16924	0.327832	0.244137	0.449123	0.271937	0.288102	0.34331	0.00741039
C10orf90	0.06175	0.200365	0.139148	0.163603	0.138399	0.172335	0.10928	0.171972	0.252505	0.15522	0.109179	0.186808	0.13493	0.140942	-0.151932	0.0559282	-0.0146085	0.029877	0.0773689	-0.00751922	0.0811997	0.0254986	0.0690416	0.039988	0.14839	0.0755277	-0.0170517	0.0761313
C10orf95	0.210443	0.371534	0.469848	0.128125	0.0809738	0.14675	0.453626	0.167217	0.414445	0.21842	0.359403	0.0319568	0.228628	0.336784	0.0555178	0.122598	0.232519	0.187523	0.33566	0.0947402	0.173852	0.0882247	0.144946	0.365185	0.188526	0.0688738	0.309445	0.249847
C10orf99	-0.0111031	-0.173359	-0.0914875	-0.117519	0.125728	0.0792854	-0.105339	-0.0394498	-0.0392652	0.0961516	0.00271654	0.0197035	-0.0529596	-0.142585	-0.226866	0.0684052	-0.229162	-0.140368	-0.16392	-0.0828519	-0.135734	-0.0620675	-0.250969	-0.127653	-0.00580418	0.033645	0.0144654	-0.133202
C11orf1	-0.680966	-0.802686	-0.803829	-0.720057	-0.594301	-0.560254	-0.858218	-0.522652	-0.565438	-0.449742	-0.730895	-0.528904	-0.721114	-0.533829	-0.491132	-0.714464	-0.443851	-0.344586	-0.628012	-0.664066	-1.02084	-0.559217	-0.696602	-0.601999	-0.761462	-0.540488	-0.555363	-0.593741
C11orf16	0.164286	0.179364	0.406164	0.229975	0.273329	0.324953	0.232594	0.278501	0.294433	0.0749853	0.349902	0.135212	0.080334	0.22191	0.190782	0.231137	0.039988	0.148187	0.110015	0.151915	-0.0370795	0.0831019	0.191386	0.106174	0.163603	0.211999	0.140835	0.104039
C11orf21	0.520453	0.108461	0.247578	0.493469	0.56375	0.672265	-0.00537551	0.343708	0.187769	-0.232478	0.387817	0.589713	0.0852365	0.504518	0.390956	0.308631	0.298416	0.368127	0.255838	0.889323	0.626102	0.779135	0.758811	0.339118	0.484046	0.701047	0.415117	0.685251
C11orf24	0.196591	0.324732	0.239066	0.150424	0.108074	0.359271	0.614593	0.315141	0.24513	0.280308	0.276302	0.298052	0.315276	0.368923	0.398138	0.430336	0.205383	0.264364	0.244534	0.330817	0.399268	0.462341	0.512086	0.264699	0.462959	0.428156	0.398934	0.34647
C11orf31	0.189854	-0.036285	0.0548591	0.166234	0.297705	0.0723979	-0.000688231	-0.136421	0.114523	0.1386	0.141267	0.0169182	0.23108	0.189556	0.0745994	-0.0432936	-0.0442499	0.0465669	0.134022	0.407909	0.252174	0.0300977	0.154645	-0.0465488	-0.0572828	-0.22355	0.292495	0.26727
C11orf49	0.374441	0.3403	0.247103	0.344324	0.55646	0.267672	0.239208	0.165855	0.255922	0.232788	0.252707	0.289861	0.333049	0.227165	0.0006458	0.0790591	-0.00311402	0.220278	0.055735	0.111569	0.0581989	0.12478	0.200646	0.137199	0.029045	0.0130206	0.178878	0.193311
C11orf53	0.285066	0.21433	0.238839	0.27204	0.213148	0.350576	0.178483	0.210312	0.190413	0.210395	0.394071	0.17399	0.178534	0.237579	0.27518	0.0468294	0.293794	0.293405	0.26154	0.152961	0.199662	0.232449	0.052692	0.245354	0.292495	0.106174	0.202987	0.212191
C11orf57	-0.333418	-0.229757	-0.119728	-0.178088	-0.339432	-0.227979	-0.116797	-0.292119	-0.207693	-0.191845	-0.1968	-0.109653	-0.0396079	-0.00124206	0.0103114	-0.0338426	0.125728	0.0254499	-0.127861	0.0223922	0.0169182	-0.150281	-0.181154	-0.0706439	-0.160985	-0.0756777	-0.150748	-0.150374
C11orf58	-0.909456	-0.604053	-0.595724	-0.978829	-0.974102	-0.870378	-0.415365	-0.622506	-0.710869	-0.482462	-0.59921	-0.443319	-0.385077	-0.579682	-0.156724	-0.328332	-0.18169	-0.279087	-0.144388	-0.28267	-0.583955	-0.82393	-0.148569	-0.153028	-0.460021	-0.350124	-0.315371	-0.233098
C11orf63	-0.151991	-0.0760612	0.341647	-0.171913	-0.202025	0.143535	0.168696	0.0163631	0.0393734	0.0883264	-0.0802333	0.0525512	0.138065	0.267035	-0.153157	0.224369	-0.0905627	-0.103484	-0.0400299	0.125599	0.01718	0.241405	-0.132793	0.24513	0.00656146	0.167138	-0.141114	-0.115773
C11orf65	0.259163	0.185512	0.244624	0.201474	0.120445	0.0649162	-0.0830574	0.193311	0.0671662	0.0597407	-0.0287351	0.118478	-0.08586	-0.0934284	0.0523409	-0.00247066	-0.0409544	-0.105653	0.0271566	0.0757317	0.00410759	0.0360133	0.181138	0.227844	0.0853798	0.0607938	0.208265	-0.0470556
C11orf68	0.255582	0.248211	0.251301	0.207623	0.341647	0.34178	0.346025	0.561994	0.439682	0.451567	0.43661	0.574707	0.672946	0.769477	0.624266	0.665273	0.681079	0.591825	0.630461	0.65483	0.452173	0.59369	0.368689	0.323863	0.465806	0.392087	0.25055	0.489485
C11orf70	0.00493078	-0.021449	0.133338	-0.174363	0.142085	0.0433159	0.0389313	0.173542	-0.0929314	-0.0327172	-0.0393767	-0.0190746	0.0271566	-0.0718608	-0.177936	0.0143514	-0.25087	-0.241001	-0.149521	-0.110892	-0.0923995	-0.182348	-0.232172	-0.316706	-0.239106	-0.0784079	-0.38941	-0.208261
C11orf71	-0.224809	-0.442903	-0.218679	-0.314238	-0.113607	-0.230031	-0.0343123	-0.171986	-0.0878914	0.00125493	-0.0329394	-0.00278847	0.0349114	-0.263785	0.108511	-0.119946	0.313903	0.0693595	0.152472	0.0163631	-0.370639	-0.194075	-0.07469	0.16162	-0.0628668	-0.0860499	-0.0227454	-0.275647
C11orf80	-0.480359	-0.622239	-0.692081	-0.701729	-0.41953	-0.469431	-0.642538	-0.589113	-0.544934	-0.558933	-0.516791	-0.488897	-0.623868	-0.328822	-0.381157	-0.649807	-0.7414	-0.41265	-0.580922	-0.411628	-0.67936	-0.536729	-0.469591	-0.575955	-0.568053	-0.693233	-0.64328	-0.77214
C11orf88	0.1387	0.168161	0.171236	0.106989	-0.152063	0.182191	0.00790039	0.0438865	-0.000345887	-0.105411	0.0458705	0.131503	0.0879567	0.00996255	-0.00445179	0.157572	0.157105	0.0459894	0.0723979	0.153908	0.183779	0.0780623	0.157338	-0.056366	0.0106754	-0.0244335	-0.0794804	0.178686
C11orf96	-0.138504	-0.157597	-0.383441	-0.191672	-0.229239	-0.227569	-0.187799	-0.230307	-0.144727	-0.211793	-0.163853	-0.184227	-0.215137	-0.11471	-0.0274359	-0.158989	-0.160774	-0.136421	-0.208331	-0.168417	-0.0518263	-0.111033	-0.197701	-0.0463803	-0.277582	-0.187889	-0.151683	-0.143292
C12orf29	0.0309788	-0.0192914	-0.170389	0.00223956	0.0110972	0.0711891	0.0381292	0.0243143	0.166361	0.165691	0.0403554	0.0468294	0.0951199	-0.0190746	0.278206	0.126312	0.0625482	0.264597	0.176105	-0.0872209	-0.069393	0.220818	0.106379	0.108124	0.102099	0.135973	0.182411	0.108074
C12orf4	-0.18732	0.0185907	-0.51199	-0.359912	-0.162093	-0.181324	-0.559884	-0.113462	-0.309635	-0.345234	-0.168061	-0.560501	-0.39987	-0.54417	-0.324593	-0.0350067	-0.414551	-0.176816	-0.200719	-0.231113	-0.439791	-0.268612	-0.125036	-0.437689	-0.380131	-0.510872	-0.0953971	-0.154345
C12orf43	-0.32906	-0.435827	-0.232172	-0.25889	-0.228599	-0.261851	-0.168061	-0.182693	-0.361116	-0.441974	-0.357471	-0.520561	-0.421622	-0.366333	-0.499765	-0.266108	-0.304157	-0.483546	-0.463794	-0.315371	-0.186414	-0.3485	-0.385606	-0.264734	-0.34815	-0.26526	-0.439682	-0.384616
C12orf49	-0.110107	-0.269574	-0.239377	-0.139644	-0.26526	-0.164178	-0.0937355	-0.182882	-0.140229	0.04791	-0.104072	-0.316819	-0.00593249	-0.118925	-0.157987	-0.265443	-0.329878	-0.0307725	-0.243909	-0.183459	-0.19424	-0.192175	-0.0537826	0.0393734	-0.124518	-0.233007	-0.132305	-0.297263
C12orf56	-0.399706	-0.28516	-0.377654	-0.313881	-0.326336	-0.486833	-0.369502	-0.389562	-0.483214	-0.371576	-0.214639	-0.385715	-0.367027	-0.394042	-0.321966	-0.349642	-0.257122	-0.694113	-0.620905	-0.325966	-0.47914	-0.504162	-0.358501	-0.40788	-0.607231	-0.448402	-0.478137	-0.431845
C12orf57	-0.0924753	-0.0985637	-0.0657496	-0.134951	-0.145053	-0.115773	0.050102	-0.0350067	0.00377051	-0.0554255	-0.127103	-0.0605572	0.0311567	0.00106009	-0.00860986	-0.00361961	0.135073	0.00794075	0.0451016	0.0989984	-0.0148406	-0.149676	0.11477	0.229569	-0.156913	0.116136	0.0258208	0.0521487
C12orf60	0.237477	0.233323	0.040232	0.224808	0.261964	-0.0243062	0.252001	0.181386	0.344324	0.0918263	0.0214915	0.296315	0.174588	0.456924	0.347434	0.326031	0.168939	-0.0274963	0.479653	0.363043	0.0438865	0.285154	0.340525	0.00271654	0.0287657	0.175611	0.0488799	0.262994
C12orf65	0.443639	0.351342	0.0175843	0.356814	0.25835	0.118425	0.268763	0.0656824	0.543816	-0.0483168	0.218183	0.19223	0.257643	0.230975	0.232788	0.171796	0.243714	0.0504705	0.178249	0.414232	0.167138	-0.114575	0.194569	0.255705	0.153908	0.212448	0.158686	0.295027
C12orf66	-0.332411	-0.207193	-0.303157	-0.232761	-0.0421288	-0.220635	-0.291504	0.187139	0.127853	-0.289935	-0.269023	-0.0973965	-0.0960543	-0.360419	-0.19834	-0.278715	-0.431725	-0.386383	-0.296448	-0.148249	-0.510016	-0.0207229	-0.480359	-0.388476	-0.252701	-0.114927	-0.0785922	-0.19556
C12orf76	0.108174	0.253308	0.346714	0.127012	0.350472	0.352503	0.0192672	0.290169	0.0781375	0.150134	0.187523	0.206668	0.137635	0.0845313	0.0941777	0.0898363	0.0624901	-0.0433593	-0.016104	0.249917	0.0608907	-0.00144274	0.0635641	-0.138504	0.0407019	0.134104	-0.00593249	-0.0485186
C14orf105	0.239419	0.162878	0.392421	0.0128284	0.294764	0.157637	0.303349	0.163987	0.156457	0.12039	0.0807844	0.0877657	0.470808	0.0303332	0.12538	0.337682	0.0350308	0.406164	-0.311494	0.161338	0.255403	0.170371	0.265778	0.0677698	-0.0154429	-0.0666753	0.260483	0.0380856
C14orf119	-1.11965	-1.06476	-0.958242	-0.960623	-1.11616	-1.0802	-0.961698	-1.07712	-1.17217	-1.0005	-1.0907	-0.870378	-0.91831	-1.01774	-1.01194	-1.25689	-1.04279	-1.04138	-1.07935	-1.0184	-1.16448	-1.15215	-1.13455	-0.943166	-1.14674	-1.08428	-1.1615	-1.11076
C14orf159	1.07408	1.23727	1.04111	1.1074	1.00398	1.28952	0.578374	0.829171	1.3392	0.794971	1.09057	1.4134	1.31761	0.903298	1.21234	1.377	1.40681	0.957797	1.50547	1.07632	1.49799	1.35887	1.18373	1.26288	1.377	1.48798	1.07126	1.52765
C14orf166	0.191192	0.133902	0.142085	0.0812506	-0.131191	0.213535	0.198872	0.102947	0.22258	0.170151	-0.000780162	0.235455	0.248402	0.262053	-0.0303384	0.30641	0.243237	0.105701	0.0157812	0.263524	0.100024	0.0770633	0.0505288	0.105901	0.324646	0.14893	-0.0219137	0.0576029
C14orf180	0.130817	0.332257	0.144337	0.388935	0.439089	0.519833	0.352359	0.746466	0.345788	0.124189	0.339861	0.416568	0.386004	0.483754	0.718794	0.312241	0.516144	0.25379	0.294024	0.602276	0.580636	0.6461	0.630461	0.558664	0.305437	0.482802	0.232178	0.537216
C14orf2	0.0335942	0.1391	0.368414	-0.0149747	0.215069	0.222498	0.19856	0.0882811	0.337682	0.279354	0.300472	0.172405	0.278799	0.344101	-0.00334627	0.0831019	0.207972	0.0233434	-0.0879578	0.0419326	0.108989	-0.0623123	0.0450171	0.29433	-0.0141319	0.106116	0.0828912	-0.0388496
C14orf28	0.115944	0.113237	0.488338	0.330442	0.0888562	0.151558	0.184189	0.2316	0.311292	0.352186	0.284693	0.148705	0.217648	0.362164	0.182519	0.236774	0.324497	0.0260773	0.288891	-0.0357255	0.231531	0.295442	0.387817	0.0856548	0.266507	0.148057	-0.011989	0.195513
C14orf37	0.235008	0.277362	0.140466	0.209423	0.177152	0.101394	0.228748	0.058066	0.116869	0.0425384	0.191646	0.0459894	0.108124	-0.0223501	0.137512	-0.0131836	0.00976825	0.103958	0.195302	-0.0366553	-0.00529317	0.183023	0.06175	0.123128	0.149494	0.102597	0.124703	0.135147
C14orf79	0.433619	0.183699	0.250469	0.137759	0.266507	0.302392	0.2509	0.374619	0.190917	0.29045	0.282362	0.312841	0.12371	0.189619	0.264023	0.271731	0.402799	0.206598	0.265318	0.173164	0.0538632	0.299522	-0.0185185	0.140466	0.380953	0.293405	0.313903	0.188913
C14orf93	0.0265126	-0.0321951	-0.124518	0.00790039	-0.0352882	-0.0061089	-0.0812265	-0.0963935	-0.0881588	0.0275375	0.0123382	-0.0761112	-0.132156	0.0643401	-0.0213322	0.11477	0.072729	-0.0107011	0.128966	0.0125356	0.138065	0.129173	0.130286	0.0150277	0.0585049	0.0006458	0.147947	0.0853798
C14orf99	-0.363276	-0.446729	-0.468775	-0.506951	-0.432029	-0.404918	-0.292683	-0.471127	-0.662632	-0.432401	-0.793641	-0.223008	-0.664742	-0.314238	-0.41481	-0.205301	-0.726578	-0.556436	-0.45089	-0.535781	-0.281657	-0.270965	-0.490777	0.0762503	-0.349742	-0.263681	-0.236512	-0.146773
C15orf39	-0.0800209	-0.00963685	-0.218181	-0.165758	-0.156724	-0.130916	0.175756	-0.248803	-0.216378	0.164436	0.0741469	-0.107908	-0.121662	-0.241815	0.058066	0.0653933	0.111488	0.00416143	-0.14672	-0.220543	-0.131853	-0.0885654	0.123401	0.0441473	0.197263	0.0990478	-0.0261259	-0.0708967
C15orf41	0.221072	0.816297	0.53555	0.404961	0.213746	0.582278	0.0944384	-0.00329868	0.352503	0.226459	0.504202	0.553211	0.36971	0.632168	0.564629	0.55703	0.775593	0.677256	0.836987	0.829171	0.496019	0.538627	0.620098	0.553852	0.546908	0.527881	0.387552	0.623227
C15orf48	-0.044387	0.0694255	0.046266	0.0144654	0.256618	0.0637489	0.0916106	0.1306	-0.239714	-0.339432	0.126669	0.0616698	-0.246142	0.169884	-0.190823	-0.230992	0.00218975	-0.0358917	-0.0878914	-0.158989	0.101338	-0.0942346	0.0189812	0.181881	0.129832	0.000556912	-0.015384	0.0888562
C15orf52	-0.407094	-0.479837	-0.357351	-0.0155832	-0.333186	-0.241512	-0.170817	0.0169182	0.07429	0.240511	-0.00218334	0.0477854	0.27698	0.209423	0.0588404	0.0732637	0.271111	0.177927	-0.0111691	0.337682	0.357241	0.275366	0.136025	0.311292	0.302263	0.190342	0.160607	-0.0430196
C15orf57	-0.257846	-0.147743	-0.0917029	-0.038572	-0.0300808	-0.137676	-0.119889	0.168862	-0.132305	-0.270248	-0.22266	-0.0587491	-0.104486	-0.183519	-0.208683	-0.113401	-0.248899	-0.167587	-0.209079	-0.0910861	-0.160144	-0.254168	-0.323636	-0.299305	-0.22392	-0.375374	-0.30226	-0.365568
C15orf59	-1.64042	-1.90639	-1.71702	-1.64042	-1.43728	-1.28947	-2.01873	-1.16448	-1.5546	-1.16646	-1.81262	-1.36588	-1.44365	-1.24414	-1.31325	-2.05902	-1.42098	-1.66943	-1.61409	-1.90162	-1.47798	-1.49571	-1.48631	-1.33725	-1.62744	-1.54488	-1.53342	-1.59283
C15orf61	-0.339292	-0.385211	-0.336884	-0.317377	-0.138915	-0.226105	-0.228147	-0.349373	-0.206841	-0.29967	-0.166859	-0.0381342	-0.166378	-0.216057	-0.356542	-0.167479	-0.288264	-0.210375	-0.155991	-0.12105	-0.370765	-0.173579	-0.239639	-0.338171	-0.374061	-0.128789	-0.403365	-0.147743
C16orf45	0.14839	0.0972091	0.242497	0.214482	0.159054	0.364909	0.128929	0.272485	0.0996642	0.213281	0.232341	0.256486	0.16863	0.366625	0.366047	0.429189	0.35629	0.294105	0.429046	0.506515	0.471625	0.35203	0.401234	0.44583	0.415661	0.451366	0.301013	0.383381
C16orf46	-0.529338	-0.145589	-0.445254	-0.621264	-0.430637	-0.934955	-0.553366	-0.3771	-0.4887	-0.726942	-0.689567	-0.710262	-0.429521	-0.720483	-0.789654	-0.751397	-0.488166	-0.409174	-0.466214	-0.552535	-0.52706	-0.455804	-0.715315	-0.185929	-0.475662	-0.284274	-0.267981	-0.280523
C16orf58	0.698457	0.706064	0.701698	0.630117	0.767098	0.75976	0.693067	0.591825	0.662804	0.592435	0.480742	0.659146	0.503857	0.455449	0.397586	0.505878	0.389301	0.395545	0.3954	0.369074	0.466257	0.517714	0.426675	0.2588	0.441274	0.305627	0.407909	0.284771
C16orf62	-0.21559	-0.322088	-0.19102	-0.261939	-0.166328	-0.173744	-0.329878	-0.182041	-0.300671	-0.268202	-0.28869	-0.275381	-0.254168	-0.27636	-0.221589	-0.16626	-0.233936	-0.183589	-0.16131	-0.241704	-0.24815	-0.255923	-0.295262	-0.154671	-0.270859	-0.284964	-0.304909	-0.280765
C16orf72	0.19931	0.349902	0.260563	0.110606	0.300472	0.121928	0.2095	0.256486	0.199019	0.0626103	0.203587	0.244045	0.156598	0.118425	0.238536	0.129906	0.159054	0.169822	0.126543	0.128966	0.280724	0.0980477	0.238182	0.147237	0.136025	0.174041	0.352735	0.00428852
C16orf74	-0.41439	-0.575776	-0.623668	-0.607649	-0.397351	-0.575955	-0.724615	-0.447702	-0.61961	-0.530853	-0.776768	-0.526886	-0.619287	-0.471993	-0.534637	-0.461321	-0.621868	-0.727317	-0.778762	-0.604882	-0.594549	-0.480519	-0.524312	-0.574467	-0.703873	-0.46329	-0.42246	-0.640998
C16orf86	-0.143969	-0.106737	-0.328332	0.0542655	-0.0219747	0.0697303	0.213833	-0.0220286	-0.10636	-0.239457	-0.0498985	-0.19834	-0.112654	0.0642335	0.00259114	0.163424	0.144225	0.0806192	0.212366	0.0388135	0.0949204	0.221722	0.213677	0.164436	0.0233434	0.109696	-0.246233	0.174654
C16orf89	-0.654454	-0.436994	-0.658705	-0.512135	-0.664066	-0.64701	-0.713984	-0.605584	-0.388727	-0.61706	-0.383635	-0.499078	-0.759488	-0.152381	-0.701729	-0.581805	-0.455294	-0.368391	-0.412333	-0.3771	-0.438767	-0.298949	-0.430488	-0.608056	-0.53713	-0.567312	-0.579221	-0.585741
C16orf95	0.214073	-0.157348	-0.197889	0.121432	-0.228696	0.0181243	-0.01017	-0.0835555	0.0124701	0.0269676	-0.119158	0.168094	0.0973446	0.19341	0.0309184	0.101951	0.0372366	0.223727	0.126718	0.0986633	0.375113	0.20291	0.209624	-0.0402819	0.330182	0.145375	-0.00409716	-0.119477
C17orf105	0.0514373	0.232449	0.118299	0.00976825	0.42878	0.39005	-0.016104	-0.151932	0.230032	0.171522	0.291392	0.0434407	0.121277	0.263524	-0.118663	-0.0195866	0.410836	-0.0432277	0.361171	-0.188566	0.20383	0.37997	0.349634	0.120672	0.266671	0.474041	0.291477	0.313903
C17orf49	-0.3125	-0.440914	-0.100225	-0.307131	-0.154249	-0.375656	-0.0667401	-0.230913	-0.165151	-0.0176229	0.0241254	-0.230759	0.00212311	-0.1851	0.00161179	-0.210602	-0.137438	-0.340357	-0.186041	-0.239639	-0.411784	-0.343976	-0.275068	-0.41953	-0.431421	-0.2272	-0.330327	-0.0635826
C17orf50	0.370134	0.285722	0.270019	0.428599	0.288004	0.507744	0.507491	0.446443	0.295159	0.40154	0.34178	0.369874	0.284853	0.419474	0.254738	0.261458	0.314926	0.249699	0.232961	0.139868	0.282013	0.314312	0.226922	0.269507	0.187699	0.143	0.0092325	-0.010228
C17orf51	0.131452	0.331246	-0.076005	-0.0904906	0.00233869	0.0522751	0.0252313	0.176811	0.10781	0.175034	0.0625482	0.340063	0.238449	0.275628	0.448909	0.327026	0.196591	0.386501	0.271327	0.307116	0.217417	0.0347831	0.306304	0.299138	0.394933	0.243168	0.353299	-0.0259481
C17orf53	-0.17778	-0.105277	-0.137773	-0.131853	-0.273355	-0.0544074	-0.313881	-0.295142	-0.0297444	-0.234254	-0.0608176	-0.245328	-0.150078	-0.17593	-0.34362	-0.329518	-0.298845	-0.248217	-0.409293	-0.369101	-0.0951731	-0.0465488	-0.133916	-0.235617	-0.157814	-0.00675692	-0.0610059	-0.0386189
C17orf58	-1.33983	-1.48485	-1.05833	-2.3363	-1.60496	-2.11559	-2.0105	-1.65757	-2.18584	-1.17217	-2.07503	-1.88389	-1.8709	-1.58309	-1.92471	-1.83879	-1.63084	-2.15883	-1.85381	-1.91241	-1.47522	-1.55866	-2.24187	-2.09894	-1.43728	-2.38713	-1.46091	-2.08373
C17orf67	-0.0714038	-0.0854972	-0.0311565	-0.0310296	-0.0358917	-0.0748798	-0.104424	0.0745299	-0.20063	-0.185324	-0.131766	-0.178708	-0.152516	-0.011425	-0.00703545	-0.124873	-0.054827	-0.0734369	-0.12001	-0.0935866	-0.0763285	-0.162248	-0.011425	-0.0761776	-0.0861235	-0.132456	-0.218181	-0.203294
C17orf74	0.14782	0.110015	-0.127711	-0.0636497	-0.178547	0.174278	0.299138	0.269062	0.00329178	0.0246064	0.0346722	0.255359	0.0913299	-0.0688937	0.0086754	0.295905	0.326149	0.0918263	0.0101361	-0.00764938	0.143	0.106548	0.17421	0.313615	-0.0221593	0.314926	0.0733107	-0.159363
C17orf75	-0.398217	-0.290132	-0.264415	-0.485292	-0.382838	-0.393303	-0.666504	-0.3125	-0.607231	-0.512948	-0.305832	-0.297821	-0.393088	-0.415798	-0.215347	-0.24343	-0.369502	-0.205398	-0.360687	-0.322842	-0.333311	-0.366602	-0.311494	-0.214004	-0.205301	-0.47085	-0.36451	-0.55297
C17orf80	0.058281	0.0855829	0.298416	0.143252	-0.0726117	0.265953	-0.0363537	0.105168	0.288004	0.255838	0.257643	0.202552	0.137706	0.202834	0.300396	0.19836	0.0841329	-0.0382076	-0.0271184	0.161952	-0.101386	0.100457	0.0197853	0.339217	-0.000958208	-0.0401618	0.191329	0.119881
C17orf96	-0.0477666	-0.0161665	-0.332411	-0.255434	0.114101	-0.144976	-0.332793	-0.162917	-0.14543	-0.327204	-0.442903	-0.244099	-0.377654	-0.360687	-0.223464	-0.245328	-0.303025	-0.173434	-0.374542	-0.170389	-0.353552	-0.331817	-0.198037	-0.275946	-0.506951	-0.403365	-0.400042	-0.493822
C17orf97	0.716292	0.158376	0.125316	0.104427	0.296136	-0.00942076	0.113129	0.236405	0.232961	0.136462	0.336784	0.402442	0.241472	0.354492	0.0206751	0.387817	0.122942	0.295159	0.22813	0.331544	0.398138	0.195605	0.474573	0.462341	0.4544	0.0743973	0.118299	0.265629
C17orf99	0.37997	0.41881	0.351259	0.491782	0.429189	0.435648	0.385756	0.234205	0.383381	0.548245	0.421036	0.242162	0.30894	0.43296	0.406337	0.267778	0.294211	0.254738	0.392421	0.232961	0.180772	0.321587	0.415477	0.37568	0.257323	0.353845	0.418399	0.323296
C18orf21	-0.800487	-0.823461	-0.983282	-0.896721	-0.883659	-0.920744	-0.992003	-0.923819	-0.855057	-0.825503	-1.03145	-0.975238	-0.745343	-0.830072	-0.843324	-1.07049	-0.972904	-0.974102	-1.09429	-1.24215	-1.07935	-0.805945	-0.751397	-0.598213	-0.950002	-0.841083	-0.858218	-0.877407
C18orf25	-0.382411	-0.448229	-0.472945	-0.491132	-0.420386	-0.416979	-0.568499	-0.221138	-0.449898	-0.333933	-0.453544	-0.489993	-0.425928	-0.183666	-0.307895	-0.404397	-0.486161	-0.283283	-0.444331	-0.492691	-0.374542	-0.422805	-0.319605	-0.350927	-0.602258	-0.329518	-0.332907	-0.637757
C18orf54	0.0733803	0.0428353	0.00582065	0.106548	0.0361414	0.0455731	0.187223	0.159324	-0.0608176	0.100224	-0.0473997	0.192109	0.0222052	-0.0327674	0.101544	-0.01788	0.0684522	0.111904	-0.0180883	0.0446058	0.0435766	-0.0512006	-0.0800209	-0.0573582	-0.0360245	-0.076005	0.106116	-0.0714741
C18orf61	0.0805662	0.304535	-0.0578706	0.218251	0.0674655	0.121666	-0.142725	0.0793383	-0.0480269	0.0427675	-0.0991806	-0.10036	-0.256559	-0.0441158	-0.175421	0.0917252	-0.0104963	-0.100604	-0.0434349	0.0126922	0.0309184	-0.162545	-0.116068	0.0757317	-0.16068	0.000713372	-0.20761	-0.0873587
C18orf63	-0.00500874	0.181486	-0.0877647	-0.101324	-0.172682	0.0808399	0.211252	0.226121	0.100794	0.0655627	-0.0381342	-0.0182765	0.0983306	0.127605	-0.225019	-0.064754	0.0921106	0.314312	-0.133837	0.129423	-0.0797695	0.0991899	0.0726052	0.140775	-0.20577	0.234875	0.082376	-0.0913612
C18orf8	-0.113156	-0.331817	-0.353552	-0.377951	-0.161786	-0.177105	-0.266311	-0.241001	-0.310443	-0.243909	-0.41851	-0.247129	-0.443987	-0.177025	-0.391045	-0.387733	-0.330482	-0.372968	-0.430806	-0.37111	-0.34007	-0.387916	-0.37111	-0.37111	-0.479682	-0.689567	-0.624424	-0.273526
C19orf12	0.364314	0.384243	0.309242	0.388365	0.244137	0.317424	0.611987	0.309138	0.292795	0.500185	0.578787	0.190917	0.254402	0.403803	0.491472	0.179432	0.405842	0.365485	0.542352	0.478443	0.336279	0.297105	0.239754	0.488923	0.265953	0.284039	0.250631	0.411451
C19orf18	0.077917	-0.185929	-0.177278	-0.0436732	-0.138859	0.165811	0.0405479	-0.414698	-0.286272	0.0707716	-0.232285	0.134384	0.127073	0.27224	-0.179937	-0.0937355	0.249136	0.227006	-0.0396874	-0.0710686	-0.167157	-0.170888	0.128482	0.0498247	0.249847	-0.166859	0.467361	-0.21309
C19orf24	0.214	0.220818	0.361361	0.292565	0.0791006	0.238839	0.387687	0.232519	0.191728	0.133276	0.341532	0.208085	0.137314	0.264364	0.118739	0.280905	0.11067	0.000490333	0.206871	0.268185	0.327686	0.0405479	0.21521	0.282636	0.14313	0.104317	0.102339	0.240266
C19orf25	0.176105	0.0849186	0.0933352	0.191646	-0.193646	0.00741039	0.24258	0.136798	0.155162	0.292904	0.312578	0.167065	0.223428	0.274982	0.220006	0.173802	0.291038	0.188393	0.244962	0.114891	0.243168	0.254114	0.264791	0.24752	0.301847	0.277662	0.249453	0.194713
C19orf43	-0.0751395	-0.16392	-0.343343	-0.23285	-0.261939	-0.154187	-0.263896	-0.329252	-0.343818	-0.0476195	-0.237564	-0.0972993	-0.0916313	-0.241115	-0.16819	-0.186715	-0.187889	-0.433657	-0.431845	-0.204336	-0.0920896	-0.250185	-0.270396	-0.19842	-0.396308	-0.242018	-0.137877	-0.331691
C19orf48	-0.718829	-0.55391	-0.637235	-0.57837	-0.599576	-0.883659	-0.618842	-1.06054	-0.547291	-0.89369	-0.729777	-0.990106	-0.734063	-0.800179	-1.00236	-0.668376	-0.695702	-0.820644	-0.777334	-0.890741	-0.729515	-0.898084	-0.591544	-0.626137	-0.572008	-0.94916	-0.560699	-0.730432
C19orf52	-0.194005	0.0137335	-0.219127	-0.0867064	-0.0829882	-0.194418	-0.167318	-0.383635	-0.220635	-0.27437	-0.193297	-0.154832	-0.273291	-0.1802	-0.188715	-0.114421	-0.375246	-0.24566	-0.3653	-0.216057	-0.270396	-0.282248	-0.0729504	-0.14078	-0.481249	-0.232579	-0.00669244	-0.276536
C19orf53	-0.487979	-0.736695	-0.580145	-0.325073	-0.70635	-0.508656	-0.535999	-0.60784	-0.365983	-0.390905	-0.193144	-0.451909	-0.294846	-0.524657	-0.375953	-0.2214	-0.237449	-0.578951	-0.244857	-0.228798	-0.415365	-0.433523	-0.310831	-0.113607	-0.467447	-0.282449	-0.481808	-0.384926
C19orf54	0.11183	-0.129278	0.0764337	-0.00715238	-0.00585521	0.111534	-0.00218334	0.0658184	-0.0730804	-0.0620675	-0.0338426	-0.126636	-0.0779258	0.0190803	-0.153837	-0.0622007	0.017642	-0.101967	-0.0652577	-0.151001	-0.208853	-0.126435	-0.0806968	0.0644647	-0.186556	-0.299899	-0.442598	-0.153837
C19orf57	0.0756843	0.147454	0.0766038	0.0804106	-0.0525012	-0.0262657	-0.127593	-0.110239	0.0520356	0.0732013	0.0709393	0.229661	0.271731	0.260403	-0.0859307	0.172335	0.309749	0.136268	0.116705	0.152062	0.27282	0.35509	0.16483	0.436099	0.256801	0.155119	0.142326	-0.0200031
C19orf68	-0.777664	-0.482121	-0.653118	-0.488352	-0.614103	-0.654985	-0.456728	-0.608531	-0.371576	-0.497007	-0.284185	-0.614863	-0.453999	-0.631572	-0.591998	-0.739166	-0.518714	-0.635994	-0.538776	-0.534637	-0.446028	-0.693233	-0.595007	-0.630069	-0.837958	-0.434248	-0.529338	-0.430324
C19orf70	0.307789	0.241182	0.224287	0.400412	0.291683	0.180772	0.670214	0.40154	0.232011	0.158588	0.537528	0.302033	0.149176	0.306003	0.438435	0.521316	0.437991	0.275628	0.485062	0.467361	0.368414	0.228676	0.412278	0.502255	0.198936	0.408075	0.262816	0.465585
C19orf73	0.380953	0.594767	0.393187	0.331246	0.318273	0.366393	0.289195	0.185213	0.377247	0.310065	0.114711	0.473828	0.462774	0.338768	0.1306	0.378342	0.272335	0.324646	0.199662	0.20142	0.277767	0.272713	0.250397	0.335757	-0.21559	0.230893	0.677777	0.32252
C19orf81	-0.133916	0.232099	-0.030889	-0.0492924	-0.101846	-0.112708	-0.0469828	0.0335296	-0.22355	0.0163631	0.0238408	-0.115061	0.0399184	-0.0961157	0.0384368	-0.201051	-0.181075	-0.0458705	-0.0229648	0.0669045	-0.0623123	0.0265126	0.07429	-0.0915572	-0.196885	-0.0789044	-0.274507	-0.093007
C1D	-0.132935	-0.178461	-0.0607468	0.181881	-0.253013	-0.225233	-0.254844	-0.0669769	-0.220938	-0.341571	-0.367708	-0.20408	-0.160774	-0.23399	-0.364366	-0.132865	-0.151683	-0.0111691	-0.365568	-0.124458	-0.173359	-0.424567	0.0800756	0.558067	-0.0357255	-0.231437	-0.165601	-0.105846
C1GALT1	-0.153028	-0.118125	-0.391912	-0.307762	-0.325481	-0.0353359	-0.056604	-0.211793	0.0844094	0.146146	0.0884913	0.0672601	0.203365	0.236229	0.145009	0.0981526	0.0137335	0.226296	0.425258	0.292022	0.0819935	0.370936	0.197191	0.0482898	0.308814	0.260095	0.41304	0.252931
C1QB	0.991781	1.12354	1.14453	2.00666	2.03829	1.27782	1.15154	1.71097	1.73911	1.60276	1.03047	1.59196	1.30931	0.811322	0.890749	0.682286	1.48144	0.777337	0.937344	0.715703	1.30473	0.768408	0.932352	1.09572	0.932352	0.801807	0.6165	1.48144
C1QC	0.725738	0.829171	0.547258	0.96917	0.449123	0.666636	0.325629	0.660458	0.855687	0.88303	0.481577	0.933857	0.7995	0.881591	0.560866	0.483527	0.718203	0.475038	0.220083	0.430748	0.693757	0.428409	0.545417	0.56817	0.5136	0.51237	0.313375	0.860196
C1QL2	0.161338	-0.0304836	-0.16568	-0.218875	0.131855	0.0528313	-0.271344	-0.0710686	-0.124005	-0.194837	-0.217917	-0.196885	-0.215498	-0.161112	-0.137267	0.186756	-0.225019	-0.350008	-0.110829	0.0733107	-0.0159281	0.0273541	-0.0495768	-0.246957	-0.184311	-0.255557	-0.0567726	-0.132456
C1QTNF1	0.266433	0.338319	0.25969	0.378342	0.129036	0.189556	0.218027	-0.0100587	0.219069	0.216993	0.224583	0.395088	0.3319	0.260647	0.189081	0.378101	0.34591	0.244349	0.130762	0.304625	0.274463	0.298599	0.276302	0.28611	0.212276	0.334995	0.228806	0.5136
C1QTNF1-AS1	-0.122944	-0.431257	0.029045	0.122127	0.18811	0.387972	-0.0706439	0.482802	-0.0162233	0.0782127	-0.322731	0.0436585	-0.0882192	-0.1182	-0.0608176	0.173086	-0.143646	-0.0364031	-0.208853	-0.173293	-0.0429067	-0.0782711	0.0975317	0.0795202	-0.0765987	-0.280765	-0.0599608	0.168568
C1QTNF3	0.0262301	-0.136352	-0.0625688	-0.217456	-0.200267	-0.188566	-0.107024	-0.0703673	-0.0600753	-0.179696	-0.177359	-0.134406	-0.151359	0.175611	-0.302555	-0.217184	0.0132404	-0.0570536	-0.218679	-0.225971	0.0884913	0.0855829	-0.249082	-0.421177	0.0408432	-0.271546	-0.00426882	0.0544654
C1QTNF5	-0.142725	-0.284677	-0.259978	-0.301143	-0.397045	-0.437968	-0.290586	-0.453238	-0.34659	-0.218679	-0.18169	-0.364121	-0.381581	-0.501781	-0.273196	-0.353552	-0.450106	-0.262541	-0.342824	-0.330583	-0.127711	-0.15768	-0.182189	-0.254565	-0.322731	-0.208528	-0.171087	-0.245407
C1QTNF7	-0.639747	-0.820644	-0.72165	-0.477305	-0.785337	-0.769402	-0.868428	-0.614103	-0.669985	-0.999947	-0.896721	-0.708931	-0.724615	-0.663408	-0.717524	-0.731211	-0.491328	-0.459451	-0.853379	-0.688092	-0.559621	-0.716715	-0.501024	-0.846027	-0.682688	-0.610244	-0.700738	-0.454357
C1QTNF9B	0.438905	0.558404	0.517385	0.423081	0.284492	0.336897	0.196508	0.41881	0.564212	0.29052	0.314512	0.387234	0.444028	0.309833	0.248989	0.300472	0.283173	0.302137	0.590836	0.4843	0.247578	0.373247	-0.0043849	0.182519	0.264364	0.470085	0.186756	0.231137
C1R	0.0499161	0.178074	0.724955	0.574221	0.507491	0.433619	0.622821	1.65348	0.991781	1.28952	0.400563	0.740316	1.04753	0.735235	1.02148	0.0247163	0.870337	0.220532	0.252707	0.30174	0.683666	0.105331	0.615031	0.387687	0.208798	0.096257	-0.0867064	0.752752
C1S	-0.217917	-0.208683	0.0565536	0.121863	-0.0171363	-0.0167765	-0.0337857	0.0226155	-0.135378	0.0410925	-0.055024	0.120809	-0.102267	0.0403554	0.108628	-0.0426601	-0.0164636	0.181881	0.0471131	0.104317	-0.148249	-0.0138826	-0.172449	-0.017694	-0.0366553	-0.0872209	0.0699711	0.0424221
C1orf100	0.110896	0.294849	0.211348	0.0493076	0.158186	0.0526189	0.265705	0.0789246	0.219862	0.117642	0.120445	0.225109	0.144456	-0.0249785	0.123489	0.0136941	0.0775011	-0.00616628	0.00190032	-0.111315	-0.193297	-0.0583482	0.0410409	0.0725214	-0.0538849	0.4456	0.0650351	0.0357901
C1orf105	0.0827728	0.0542655	0.208984	0.0559855	0.063099	0.033859	0.258549	0.206527	0.0794048	0.0130678	0.128396	0.00548332	0.000216621	0.082213	0.171049	0.0320801	0.0370376	0.0104232	0.108744	0.0118733	0.0105451	-0.0374381	-0.00654359	-0.0187598	-0.0168554	-0.0439847	0.136798	0.0378852
C1orf111	0.388816	0.200123	0.576987	0.483304	0.345624	0.429046	0.27074	0.316832	0.22288	0.0049872	0.26344	0.09222	0.219792	0.190719	0.279544	0.134104	0.208265	0.276707	0.165759	0.206527	0.246362	0.145655	0.192313	0.250397	0.266086	0.0337968	0.285318	0.212853
C1orf115	0.573312	0.801807	0.586602	0.758811	0.612508	0.860196	0.800468	0.430336	0.905158	0.772068	0.914324	0.348573	0.642661	0.7995	0.785706	0.531494	0.603298	0.492073	0.766183	0.701698	0.548902	0.468693	0.789671	0.771318	0.64143	0.501735	0.647579	0.686217
C1orf116	-0.139287	-0.164321	-0.105081	-0.129678	-0.125829	-0.0652577	-0.212813	0.190342	-0.0923995	0.00350774	-0.090958	-0.0323138	-0.140694	0.157242	-0.020957	-0.139709	-0.147406	-0.0708967	-0.143148	-0.396567	-0.151635	0.0380856	-0.133336	-0.076394	-0.102781	-0.0372138	-0.0720554	-0.225233
C1orf123	-1.03506	-1.13691	-1.02132	-0.907718	-0.788513	-0.730432	-0.981326	-0.60384	-0.910005	-1.03988	-1.07298	-1.02744	-1.13613	-0.823069	-1.09302	-1.13219	-1.14029	-1.13326	-1.28203	-1.12297	-1.14189	-1.11445	-1.12775	-1.15988	-1.09885	-1.32331	-1.24311	-1.15902
C1orf131	0.406337	0.612508	0.545417	0.451567	0.431986	0.486493	0.322634	0.590836	0.592435	0.487764	0.332437	0.507124	0.266169	0.42348	0.261314	0.205286	0.216808	0.380112	0.270019	0.42028	0.350019	0.355497	0.233384	0.21334	0.314236	0.173424	0.273654	0.367662
C1orf132	0.43414	0.485062	0.233192	0.223035	0.343192	0.204028	0.305726	0.288296	0.197549	0.532767	0.370134	0.543369	0.505047	0.436855	0.265629	0.271652	0.244137	0.501735	0.263606	0.205577	0.366753	0.422283	0.516144	0.122942	0.388935	0.391874	0.29493	0.288296
C1orf146	0.0329087	-0.17145	-0.10307	-0.161112	-0.0651819	-0.126531	-0.254656	-0.216231	-0.10036	-0.18723	-0.171569	-0.104634	-0.164388	-0.0368742	-0.0319184	-0.160596	-0.0046743	-0.0245004	0.0792854	0.0521487	-0.121584	0.0784649	-0.230845	-0.149127	-0.153088	-0.0978489	-0.152462	-0.368862
C1orf158	0.678533	0.505047	0.88554	0.590836	0.849085	0.693067	0.484798	0.621073	0.645529	0.465043	0.260007	0.671656	0.491782	0.458872	0.374312	0.439918	0.592435	0.472802	0.374005	0.542691	0.473552	0.427357	0.293111	0.213148	0.483092	0.337226	0.114399	0.312025
C1orf159	-0.0984086	0.217106	0.279462	-0.132638	0.0599604	0.215532	0.0853219	-0.252479	0.0972091	0.252447	0.417534	-0.0249785	-0.0864979	0.300929	-0.00529317	0.410665	-0.353042	0.078723	-0.0467348	0.059902	-0.00687924	-0.289113	0.213203	-0.0848347	-0.313573	0.0717218	-0.0174281	0.313615
C1orf168	-0.177025	0.0006458	0.0283078	-0.159751	-0.0628668	-0.0459836	-0.125345	-0.00426882	0.0140472	-0.16522	-0.265522	-0.0923995	-0.0141954	0.119334	0.10781	-0.112252	-0.269972	-0.250458	-0.0931008	-0.0850659	0.0294858	-0.184137	-0.199694	-0.104912	-0.00329868	-0.138732	-0.280864	-0.0857891
C1orf186	-1.11693	-1.13613	-1.10153	-0.685752	-0.799789	-0.490434	-0.609121	-0.887225	-0.731211	-0.725865	-0.559433	-0.57795	-0.872023	-0.481937	-0.695403	-0.870378	-0.83333	-1.10104	-0.958242	-0.898503	-0.930872	-0.908889	-0.662894	-0.591998	-0.914842	-0.958242	-0.602457	-1.07776
C1orf189	0.467361	0.497598	0.331665	0.386154	0.426675	0.453626	0.408075	0.490659	0.405395	0.431141	0.405538	0.421913	0.476967	0.496679	0.202676	0.325528	0.24071	0.166299	0.284125	0.259062	0.323424	0.400563	0.295905	0.181386	0.300163	0.265066	0.152397	0.241633
C1orf198	0.507124	0.411163	0.516669	0.459898	0.12538	0.4544	1.20175	0.701047	0.51597	0.744814	0.661314	0.773729	0.771318	0.710981	1.03333	0.912292	0.624959	0.863999	0.705089	0.775593	1.01488	0.65483	0.710981	0.937344	1.06214	1.02148	1.26288	1.02148
C1orf21	0.245617	0.643694	0.541942	0.31541	0.247578	0.437095	0.684538	0.275914	0.606693	1.26288	0.58359	0.389301	0.445967	0.553457	0.404961	0.392248	0.400922	0.360636	0.439256	0.317305	0.516409	0.527259	0.292565	0.386907	0.311411	0.447427	0.417904	0.535872
C1orf210	0.244349	0.258914	0.155825	0.153856	0.152314	0.345624	0.420849	0.350702	0.557737	0.614593	0.560866	0.361892	0.503136	0.363972	0.390514	0.41732	0.520453	0.551209	0.429617	0.185757	0.399947	0.456368	0.488338	0.39005	0.43277	0.387428	0.287299	0.367481
C1orf27	0.389301	0.104903	0.173802	0.256486	-0.0663115	0.376427	0.111372	0.0703405	0.26123	0.250288	0.366753	0.404338	-0.014361	0.181753	0.199593	0.0675913	0.0547993	0.0812506	0.0736589	-0.0950994	0.2579	0.3542	-0.263785	-0.0503913	0.00201317	-0.157089	0.329274	0.389865
C1orf35	0.601795	0.69521	0.220532	0.410492	0.465806	0.720385	0.201339	0.334223	0.407689	0.451211	0.319353	0.518245	0.493067	0.634586	0.450255	0.483754	0.600414	0.357701	0.445257	0.266671	0.462597	0.507491	0.376427	0.369391	0.482545	0.408289	0.367662	0.132237
C1orf43	-0.944902	-1.11445	-0.93386	-0.793243	-1.0405	-0.878382	-0.773569	-1.05701	-0.817414	-0.925786	-0.638518	-0.638047	-0.524312	-0.67561	-0.52286	-0.49855	-0.387001	-0.676845	-0.741002	-0.412049	-0.651928	-0.881845	-0.645773	-0.267356	-0.715315	-0.398047	-0.519327	-0.352558
C1orf50	-0.056366	-0.115293	-0.232285	-0.0975581	-0.136931	-0.138435	-0.294567	-0.162008	-0.264822	-0.0678346	-0.335175	-0.179696	-0.027936	-0.303747	-0.231972	-0.472581	-0.383308	-0.112708	-0.42312	-0.469143	-0.223008	-0.00730094	-0.284868	-0.352106	-0.386383	-0.074147	0.0140472	-0.0831205
C1orf52	-0.319605	-0.307762	-0.391592	-0.631274	-0.299107	-0.243323	-0.520114	-0.398564	-0.499765	-0.441061	-0.401477	-0.318734	-0.255837	-0.777072	-0.551173	-0.400278	-0.74069	-0.4686	-0.174437	-0.35892	-0.406404	-0.65052	-0.635065	-0.396892	-0.32025	-0.436831	-0.508831	-0.478137
C1orf53	-0.221816	-0.172502	-0.176497	-0.28096	-0.100669	-0.142271	-0.171913	-0.0923184	-0.245809	-0.0925314	-0.114174	-0.115919	-0.190923	-0.0430687	-0.13076	-0.0716113	0.0398537	-0.0590792	-0.232677	-0.12794	-0.200349	-0.0361401	0.0111651	-0.102849	-0.0422459	-0.0708429	-0.303854	-0.01788
C1orf54	-0.0848347	0.235209	0.184189	0.329274	0.286609	0.302616	0.602721	0.393329	0.283853	0.351033	0.544231	0.323655	0.422849	0.325733	0.400412	0.092289	0.478699	0.201626	0.409273	0.446895	0.374619	0.412278	0.475312	0.466257	0.319923	0.199992	0.0130206	0.33566
C1orf56	-0.0602019	0.215288	0.257991	0.256906	0.218183	0.0829656	0.10438	0.326882	0.140412	0.0157812	0.340063	0.165039	0.292795	0.185809	0.0150877	0.204576	0.203053	0.112777	0.0743973	0.0482898	0.181821	0.261314	0.183825	-0.0328853	0.333574	0.202121	0.0700572	0.197191
C1orf61	0.742641	0.635175	0.607694	0.0438415	0.259163	0.538627	0.414624	0.288576	0.263674	0.02629	0.454166	0.328505	0.130056	0.0892961	0.304851	0.339118	0.125554	0.0662006	0.145247	0.580173	0.388365	0.20591	0.301511	0.426079	0.370936	0.398934	0.0355128	0.348267
C1orf64	0.460654	0.431141	0.0282125	0.256029	0.310065	0.401907	0.447727	0.409622	0.192719	0.381288	0.301128	0.243098	0.305314	0.52669	0.584913	0.336509	0.368127	0.486125	0.326638	0.283089	0.438651	0.39672	0.184991	0.245976	0.314021	0.206159	0.443804	0.0194214
C1orf74	-0.0301398	-0.0993945	-0.0801077	0.130159	0.103085	-0.0392105	-0.164178	-0.0824668	-0.0740215	-0.238308	0.101616	-0.130974	-0.101386	-0.126008	-0.0167212	0.00350774	-0.0245004	-0.21668	-0.169255	-0.438767	0.012429	-0.0255208	-0.0622007	0.063099	-0.16242	-0.0890672	0.0117894	-0.0988324
C1orf94	0.403327	0.440544	0.276072	0.190264	0.438435	0.645529	0.539608	0.256276	0.360947	0.0910308	0.226922	0.571278	0.314774	0.183395	0.447983	0.354603	0.337799	0.243473	0.509437	0.264278	0.332898	0.317769	0.416407	0.357403	0.29052	0.25209	0.339592	0.279177
C2	-0.277526	-0.0545319	-0.261448	-0.0687556	-0.241413	-0.323878	-0.28096	-0.288917	0.0110537	-0.264734	-0.0860499	-0.207193	-0.0872209	-0.250653	-0.421966	-0.125165	0.0226768	-0.467035	-0.00150287	-0.235209	-0.212097	-0.260584	-0.279798	-0.290984	-0.00183742	-0.313881	0.00147933	0.061367
C20orf141	0.255705	0.0975317	0.240876	0.194259	0.325222	0.401085	0.399268	0.310429	0.235521	0.117019	0.117019	0.345217	0.118739	0.149638	0.0899541	0.216595	0.0420693	0.0686706	0.150187	0.247823	0.179497	0.143	0.186373	0.105057	0.100745	0.0150277	-0.14151	0.186177
C20orf144	-0.79507	-0.911604	-0.958635	-1.10104	-0.993732	-1.25204	-1.12856	-1.31715	-1.04723	-1.23576	-1.14297	-1.32091	-1.19806	-1.38023	-1.20973	-1.0937	-0.990802	-0.974744	-1.05175	-1.11965	-1.42498	-1.17565	-1.57003	-1.50378	-1.49202	-1.23154	-1.80357	-1.88389
C20orf187	0.212276	0.300055	0.338184	0.0910308	0.222659	0.237958	0.107052	0.382468	0.279747	0.180111	0.155614	0.31032	0.215959	0.301599	0.158641	0.0950431	0.339705	0.350576	0.143735	0.216501	0.218902	0.059672	0.219596	0.043772	0.158116	0.296533	0.0145761	0.29945
C20orf196	-0.617245	-0.730212	-0.544008	-0.869483	-0.769134	-0.736695	-0.77214	-0.84075	-0.576766	-0.590723	-0.698318	-0.810442	-0.567079	-0.686223	-0.575955	-0.708931	-0.50773	-0.403792	-0.378863	-0.594549	-0.46242	-0.657147	-0.69183	-0.799423	-0.506749	-0.469591	-0.693515	-0.404106
C20orf203	-0.184566	-0.484581	-0.349373	-0.351854	-0.194474	-0.386117	-0.735002	-0.311602	0.205046	-0.172836	-0.17052	-0.000451382	-0.0746559	0.0817929	0.0439915	-0.441974	-0.224709	-0.0717495	-0.102122	-0.472182	-0.284677	-0.169724	-0.709494	-0.237449	-0.268202	-0.363594	-0.0815945	-0.131468
C20orf78	0.110769	0.167	0.125665	0.177805	0.0555788	0.0142269	0.0369798	0.193898	0.196591	0.0813391	0.0470481	0.152263	0.0963162	0.0320801	0.00561545	-0.0530344	-0.10636	0.223099	0.0575593	0.0255694	0.0848656	0.0698436	0.100565	0.194336	-0.0594783	0.0347275	0.0405479	0.0353081
C21orf2	-0.32654	-0.524485	-0.701207	-0.245581	-0.369502	-0.662402	-0.357277	-0.477814	-0.314103	-0.410835	-0.327077	-0.588167	-0.27556	-0.256029	-0.50492	-0.0436732	-0.129881	-0.273196	0.125316	-0.33996	-0.0966867	-0.0742975	-0.455652	-0.42444	0.256486	-0.595007	-0.244545	0.365597
C21orf33	0.0366455	0.00676189	0.220818	0.129113	-0.0648853	0.210395	-0.321671	-0.201544	0.0511893	0.125188	0.0503649	0.305097	0.372395	0.459229	0.635757	0.620541	0.786925	0.88743	0.607694	0.3466	0.576987	0.580173	0.656544	0.658672	0.650317	0.678533	0.590836	0.553211
C21orf58	-1.40606	-0.996618	-0.915324	-0.857027	-1.14297	-1.24215	-0.984909	-1.17016	-1.10826	-1.11445	-1.0833	-1.31177	-1.30049	-1.47283	-1.54931	-1.33621	-1.48075	-1.45358	-1.37362	-1.23252	-1.27971	-1.59614	-1.49571	-1.24935	-1.48075	-1.44559	-1.61409	0.480979
C21orf59	-0.0724998	-0.00687924	-0.106737	-0.166328	-0.172211	-0.0875259	-0.0297444	-0.13629	-0.325711	-0.315167	-0.184311	0.00265502	-0.143365	-0.238728	-0.115061	-0.123102	-0.134481	-0.160985	-0.173806	-0.223464	-0.130211	-0.0989884	-0.067457	-0.051412	-0.227387	-0.104779	-0.0334595	-0.121584
C21orf91	0.104114	0.201053	0.172285	0.21927	0.115652	0.189619	0.168161	0.123128	-0.0541449	-0.159135	0.0150877	-0.176371	-0.159437	-0.00916207	-0.260966	-0.164619	-0.160852	0.0526189	-0.0914875	-0.157814	0.169884	0.0672176	0.111431	-0.015108	0.0140472	0.039599	0.055472	0.0167795
C21orf91-OT1	-0.258083	-0.0969225	-0.0204407	-0.145199	-0.216982	-0.249565	-0.106955	-0.098947	-0.228599	-0.150544	-0.160382	-0.429156	-0.252278	-0.435388	-0.315031	-0.402474	-0.36302	-0.262352	-0.281088	-0.233098	-0.334412	-0.488543	-0.424567	-0.332517	-0.506525	-0.503371	-0.468463	-0.268088
C22orf15	-0.122387	-0.207296	-0.194837	-0.0320115	-0.0600068	-0.170327	-0.170694	-0.153545	-0.396567	-0.416683	-0.126356	-0.336305	0.000556912	-0.310831	-0.197334	-0.159363	-0.351448	-0.204598	0.155754	0.171972	-0.0995178	-0.0770365	0.134104	-0.190341	-0.336884	-0.0975581	0.210395	-0.246364
[truncated: 12,535 more rows]
