# Supplementary material for: Multiple effect mechanisms of FLNC in dilated cardiomyopathy based on genetic variants, transcriptomics, and immune infiltration analysis
Source: Research Square preprint supplement (doi:10.21203/rs.3.rs-2795537/v1), 2023-04-12
Supplement: Supplementary file 2 [file 2b335fefdc1769d245a5e77f.xlsx]

## Sheet: Sheet1
miRNA	lncRNA
hsa-miR-1972	AC079779.7
hsa-miR-486-3p	C10orf91
hsa-miR-1972	RP11-102K13.5
hsa-miR-1972	RP5-894D12.5
hsa-miR-1972	RP13-580B18.4
hsa-miR-1972	FAM182A
hsa-miR-1972	LINC01002
hsa-miR-1972	RP11-1228E12.1
hsa-miR-1972	LINC01001
hsa-miR-1972	LINC00174
hsa-miR-558	RP11-458F8.4
hsa-miR-558	RP11-384K6.6
hsa-miR-486-3p	RP11-94C24.13
hsa-miR-558	RP5-991B18.1
hsa-miR-142-3p	MUC2
hsa-miR-558	LINC00265
hsa-miR-1972	CH507-216K13.2
hsa-miR-1972	CTD-2330K9.2
hsa-miR-1972	LINC00905
hsa-miR-1972	RP11-142C4.6
hsa-miR-558	CITF22-24E5.1
hsa-miR-558	RP11-503N18.1
hsa-miR-1972	RP11-504P24.8
hsa-miR-1972	RP11-849H4.4
hsa-miR-558	RP11-638I8.1
hsa-miR-1972	RP11-1191J2.2
hsa-miR-1972	LINC00661
hsa-miR-486-3p	RP4-539M6.22
hsa-miR-1972	FAM95B1
