# Supplementary material for: Multiple effect mechanisms of FLNC in dilated cardiomyopathy based on genetic variants, transcriptomics, and immune infiltration analysis
Source: Research Square preprint supplement (doi:10.21203/rs.3.rs-2795537/v1), 2023-04-12
Supplement: Supplementary file 3 [file 2cb72c88e0810288cb2d92dd.xlsx]

## Sheet: GSE84796
GSE84796
geneNames	GSM2251530	GSM2251531	GSM2251532	GSM2251533	GSM2251534	GSM2251535	GSM2251536	GSM2251537	GSM2251538	GSM2251539	GSM2251540	GSM2251541	GSM2251542	GSM2251543	GSM2251544	GSM2251545	GSM2251546
A1BG	0.043901	0.50934	-0.0492499	-0.156968	0.0649698	0.514678	0.245665	0.220165	0.251866	0.476049	0.288254	-0.626651	0.210693	-0.434371	3.31871	-1.30179	0.365598
A1BG-AS1	0.146434	0.589655	0	-0.656409	-0.804932	1.29393	0.51149	0.663606	1.01337	1.09853	-0.177244	-0.0823016	-0.617852	-1.15493	1.07764	-0.835935	-0.0405307
A1CF	-0.26109	-0.634817	-0.243917	-0.047091	-0.20179	0.40854	0.849656	0.68663	0.639857	0.629251	0.754844	0.383821	-0.19252	-0.0990486	0.203588	0	-0.11702
A2LD1	0	0.20831	0.409179	1.2574	0.482752	1.22416	-0.375689	-0.138135	0.0838294	0.568788	0.191049	-0.705699	-0.523114	-0.0543404	-1.47891	-0.929707	-1.70883
A2M	0.320551	-0.562702	0.172164	-0.07518	-0.221468	-0.268557	-0.097683	-0.00706387	-0.999196	0.153102	0.979249	0	0.406982	0.78462	-0.471127	0.468097	0.156838
A2ML1	-0.167047	-0.506839	-0.401119	-0.0249124	-0.0176525	0.563756	1.03049	0.822775	2.31	0.780972	1.41941	-0.0902796	-0.215034	0	0.346961	1.51175	-0.31271
A4GALT	0	-0.365257	0.0034399	-0.0383463	0.225736	-0.970716	-0.687228	-1.17364	-0.928798	-0.61264	0.800943	-0.400844	0.632535	0.96953	0.375015	0.792967	0.631625
A4GNT	-0.214342	-0.598761	-0.48901	-0.0916324	-0.0822616	0.461232	0.947972	0.719978	0.666839	0.874387	0.769255	-0.0596595	-0.201631	0.0145831	0.376998	0	-0.325184
AAA1	-0.177334	-0.520691	-0.400728	-0.0402594	-0.0226855	1.88761	1.02631	0.785912	0.680842	0.865112	0.797904	-0.103625	-0.209647	0.0097878	0.344957	-0.0232599	-0.315766
AAAS	-0.300932	-0.538131	-0.474898	-0.420357	-0.0853157	0.819755	1.50475	0.928848	0.962996	0.710469	1.11913	1.07552	-0.253016	-0.331864	0	-0.731431	0.0593948
AACS	-0.738825	-0.648379	-0.837185	-1.39073	0.315137	-0.309732	-0.0581233	0.268139	-0.172804	0.0813329	0.766247	0.312293	0.361122	-0.801144	1.25758	0.0587356	-0.00015616
AACSP1	-0.587549	-0.926298	-0.286299	-0.444838	-0.472374	0.0854707	0.585137	1.7325	0.274734	1.78532	2.08264	-0.449843	-0.517239	0.23128	0	1.48461	-0.713852
AADAC	-0.145107	-0.509302	-0.396176	-0.00830364	-0.000766	0.58061	1.00832	0.794053	0.728836	0.903636	0.835311	0.886365	-0.0410771	0	0.367141	-0.0266752	-0.326712
AADACL2	-0.523116	-0.885903	-0.773676	-0.383014	-0.395276	0.114242	0.625187	0.405199	0.339719	0.467181	0.442773	-0.454696	-0.59221	-0.374217	0	0.806479	0.310445
AADACL3	0.428689	0.333242	1.50363	0.740848	0.110983	-0.463702	-0.310618	-0.352509	-0.57084	-0.531272	-0.962193	-0.563056	1.01472	-0.0151713	0.584978	0.421696	0.00944781
AADACL4	-0.294745	0.92146	-0.560873	-0.165264	0	0.515009	0.967591	1.16325	0.595932	0.865782	0.705734	-0.221317	-0.356567	-0.127184	0.67312	-0.157103	-0.454587
AADAT	-0.553079	0.26524	0.183382	0.544388	0	0.956512	0.639744	0.623086	-0.242079	-0.0812645	-0.0054903	0.759759	-0.474617	0.191206	-0.0506992	-0.251376	-0.0133195
AAGAB	0.204343	-0.323605	-0.38063	-0.203387	-0.141378	0	0.279065	0.105369	0.388859	-0.091115	0.689549	-0.32995	0.255956	0.164118	-0.789013	0.129371	-0.6711
AAK1	-0.090493	0.127061	-0.239895	0.143356	0.110434	0.043855	0.00465767	0.229592	0.215375	-0.165113	-0.743535	0.217181	0.0624616	0.0912726	-0.50294	0.0727677	0.3189
AAMP	-0.491345	-0.800686	-0.31813	-0.423957	-0.356851	0.200718	0.687613	0.327655	0.274055	0.260208	1.06276	0	-0.372514	0.0700006	-0.3725	0.0971727	-0.0516996
AANAT	-0.735094	-0.888135	0.0359235	0	-0.870947	1.48303	1.43536	0.299772	1.1802	1.43903	0.879593	-0.487813	-1.15206	-0.0597348	0.196606	-1.52387	-0.357027
AARS	-0.536957	-0.725026	-0.183952	-0.405866	-0.122166	0.0801516	0.534374	0.183742	-0.236907	0.349928	0.866869	0	-0.0171661	0.00250244	0.267991	-0.0422602	0.445538
AARS2	0.11433	0.130287	0.068902	-0.0452337	0.223925	0.040535	0	-0.115272	-0.0216608	0.319296	-0.340098	0.16043	0.164345	-0.690849	-0.504607	-1.08242	-0.326529
AARSD1	-0.380069	-0.379773	-0.373291	-0.205572	0.046504	-0.343919	0.401241	-0.159863	-0.314403	0.00643063	0.103334	0.351203	0.00854778	0.553871	-0.121238	0	0.300477
AASDH	0.311413	-0.257369	-0.328481	0	0.22891	0.434868	-0.0282841	0.151706	-0.192289	0.256996	0.172859	0.293096	-0.437016	0.226551	-0.114068	-1.2359	-0.338518
AASDHPPT	-0.230196	-0.534199	-0.414007	0	-0.140113	0.217466	0.335381	0.41666	0.368719	0.872353	0.62306	0.496478	-0.351492	-0.104625	-0.771096	-0.457385	0.134941
AASS	-0.275766	-0.656223	-0.517694	-0.859561	-0.299964	0.0561771	1.2886	-0.185704	-0.41607	0.294792	0.165963	0.695885	0.826013	0	-0.499752	1.00905	0.848062
AATF	-0.16493	-0.591433	-0.401703	-0.360189	-0.546173	0.341644	0.761776	0.0791416	0.317446	0.709753	1.01994	0.376124	0	-0.0787716	-0.0181684	0.0431757	-0.0985222
AATK	-0.0292473	-0.403118	-0.424647	-0.554508	-0.354699	-0.276436	0.123397	0.0437686	-0.963505	0.0762157	-0.325334	0.0264473	0.176262	0.459228	1.48465	-0.202389	0.990387
AATK-AS1	-0.197993	-0.562654	-0.457764	-0.0648951	4.34605	1.66405	0.98502	0.776606	1.42691	0.775125	1.78075	-0.0843325	-0.210692	0	0.359724	-0.01231	-0.328806
ABAT	-0.160346	0.0688677	-0.307117	-0.0634332	-0.134676	0.0045321	0.532242	0.397139	0.234417	0.396284	0.105168	0.145123	-0.364791	-1.13087	-0.0173626	-0.756049	-0.141568
ABCA1	0.276409	-0.273165	-0.43226	-0.0243514	0.0268328	-0.181314	0.399173	-0.269759	0.435413	-0.288274	-0.0624795	0.593342	-0.204667	0.0420718	0.182813	-0.0617062	0.205949
ABCA10	0.148764	1.19908	0.580347	0.0096736	0	0.185737	-0.407526	-0.626218	-1.30748	-0.1957	-2.60113	0.678497	-0.207948	-0.636096	0.258325	-0.401979	0.262653
ABCA11P	0.157007	1.21409	0.578316	0.438313	0.63811	-0.575168	-1.07089	-0.193996	-0.584316	0.0657954	-1.98006	0.16818	-0.15691	-0.356488	0.753109	-0.105124	0
ABCA12	-0.388148	0.17626	-0.65346	-0.257969	-0.252461	0.303666	0.765878	0.539297	0.487619	0.709433	0.591301	0	-0.420971	-0.198306	0.166333	-0.22473	-0.532132
ABCA13	0.191964	0	-0.00653601	-0.700819	-0.663866	0.0323048	0.300234	0.0767326	0.0258384	0.476165	0.234504	-0.748755	-0.853758	-0.616496	-0.302314	1.96418	-0.902356
ABCA17P	-0.159538	-0.533994	-0.427653	-0.0299766	-0.00779867	0.593681	1.75525	0.791328	0.731472	0.916596	0.832392	-0.0671318	-0.199596	0.0209992	0.38453	0	-0.309682
ABCA2	-0.211643	-0.329788	0.107151	-0.209748	-0.148442	0.511021	0.114214	0.440794	0.494053	0.0548263	0.282123	0.261865	-0.10238	-0.614599	0.57974	-0.287074	0.0897672
ABCA3	-0.763103	-0.365616	0	-0.434339	-0.184274	0.441799	0.159145	0.125489	0.162396	0.397879	0.524149	0.218246	-0.336267	-0.404695	0.277505	-1.01387	-0.0302191
ABCA4	-1.08627	-1.22674	-1.36323	0.0261121	-0.963525	0.431807	0.0180764	1.03596	0.255949	1.05004	0.454466	1.33116	0	-0.922001	-0.589375	-0.623187	-1.24206
ABCA5	0.116775	0.286749	-0.185016	-0.21378	0.0671034	-0.280766	0.189893	0	-0.0680914	0.325756	-0.261071	0.403996	0.377772	-0.418873	-0.018899	-0.652957	0.603014
ABCA6	-0.145016	0.672553	0.398998	-0.22543	-0.433224	1.18147	0.0207138	0.244294	0.0246553	0.144321	-1.56465	-0.521661	-1.68215	-1.54313	-0.866466	0.523747	0
ABCA7	0.862211	0.785764	0.0726957	-0.486889	-1.12382	0.733303	-0.053669	0.623515	1.02666	-0.226624	-0.449706	-0.920749	0.0264783	-1.69698	0.255257	-0.442556	0
ABCA8	-0.097928	0.131493	-0.595208	-0.785083	0.205634	0.808484	0.448712	0.684114	0.396807	0.369508	-0.706824	0.995756	-0.504312	-1.71809	-0.496717	-0.317257	-0.176414
ABCA9	0.122959	0.639901	-0.148877	0.224957	-0.179333	0	-0.77731	0.135493	-0.382277	-0.824198	-2.40458	-0.506663	-0.341354	0.326138	0.377449	0.377152	0.269007
ABCB1	0.0935729	-0.385481	0.475666	-1.26778	0.342209	0.00652838	-0.0366848	-0.211968	-0.772851	0.740341	0.751654	-1.09724	-1.01828	0.963973	-1.6508	-0.873939	0.761666
ABCB10	-0.0757651	0.349192	0.277336	0.0580912	0.339188	-0.535463	-0.543463	-0.607549	-0.570077	-0.35061	-0.291727	-0.0243971	-0.0460002	0.79034	0.0506091	0.735291	0.27574
ABCB11	-1.00986	1.16086	-0.553743	-0.89584	-0.297962	0.904181	0.0144577	0.0761328	0.0491095	-0.349117	-0.207789	0.242023	-1.24829	0.980526	1.02337	0	-0.418685
ABCB4	-0.486376	-0.784715	-0.620715	-0.472776	0.452702	-1.25107	0.208387	-0.0788956	-0.709636	0.154687	0.497936	0.295318	-0.216879	0.00718784	0	0.135935	0.355463
ABCB5	-0.224104	-0.582683	-0.396383	-0.0922643	-0.0773392	0.679933	0.974368	0.754417	1.07691	0.96341	1.00922	0.589598	-0.201571	0	0.348522	-0.0137911	-0.30688
ABCB6	0.0497007	-0.232694	0	-0.165227	0.367808	-0.463103	-0.246206	-0.662782	-0.468724	-0.0374794	-0.234872	0.00388145	0.518003	0.365922	0.812596	0.513864	0.627193
ABCB7	-0.767099	-0.606194	-0.888032	-0.516745	0.0250406	-0.413405	0.35542	0.092268	0	0.296458	0.461433	0.173181	0.138682	-0.544286	-0.641335	-0.198347	0.0346622
ABCB8	-0.0705013	-0.0875762	-0.177789	-0.372143	0.207718	0.487403	0.726003	0.717192	0.59219	0.664246	0.583663	0.329169	-0.521072	-0.863674	-0.426328	-0.867896	0.162222
ABCB9	0.0906208	-0.556618	-0.18569	-0.290722	-1.18093	0.0988789	-0.524432	0.199449	-0.38507	0.353464	-0.477217	-0.53718	0.394198	-0.0834825	0.553666	-0.746425	-0.808242
ABCC1	-0.328097	-0.364287	-0.358755	-0.739546	-0.059123	0.299927	0.156061	0.0247526	0.0674968	0	0.507194	-0.432148	0.0579515	-0.233921	-0.297144	0.439179	0.528591
ABCC10	0.255868	0.281274	0.081717	0.153335	0.0450705	0.0967612	-0.364763	-0.200696	-0.393524	-0.760372	-1.21025	-0.191691	-0.150149	-0.0528428	0.112694	0.0492272	0.0827379
ABCC11	0.185033	-0.619563	-0.506447	-0.139336	-0.129031	0.390538	0.900887	0.68697	0.764799	0.689356	0.713463	-0.0848908	-0.208679	0	0.349789	-0.0105329	-0.321104
ABCC12	-0.196427	-0.538076	-0.414037	-0.0566845	-0.0313287	0.635983	0.939446	2.17521	0.658339	3.04698	0.779465	-0.130096	-0.230187	0	0.313012	-0.0430889	0.223952
ABCC13	-0.25811	-0.607878	-0.494834	-0.126856	-0.106662	0.477012	0.939388	0.731514	0.799707	1.21929	0.730224	-0.0672867	-0.185838	0.0144136	0.368989	-0.00343776	0.0960109
ABCC2	0.228275	-0.198642	-0.220029	-0.332335	-0.379379	1.12702	1.02708	0.851457	0.725434	0.156361	0.263599	-0.571647	-0.0963583	-0.0836992	-0.0449254	0.797647	0.165647
ABCC3	2.05115	0.656009	1.76444	0.546803	-0.678539	1.461	-0.4323	1.41709	2.03757	-0.277611	0.096889	-1.87487	-0.505375	-1.32859	0.0516734	-0.811395	-1.71489
ABCC4	0.106052	0.154021	-0.347863	-0.467875	0	0.178941	0.0159526	-0.266845	-0.879101	0.305539	1.01521	-0.633636	0.4835	-0.288616	-1.86985	0.256828	-0.298069
ABCC5	-0.734008	-0.494853	-0.454926	-0.196552	-0.247155	-0.259825	-0.207325	0.278089	-0.208193	0.235752	0.60336	0.0853478	1.96341	1.95051	0.22322	1.03496	0.114919
ABCC6	-0.142346	0.256159	0.0930561	-0.823769	1.29973	-0.341499	-1.00009	0.0781357	-0.242982	-0.205178	1.03237	0.613002	-0.254457	-0.611822	2.23298	-0.22026	0.722865
ABCC6P1	-0.689454	0	-0.911172	-0.542942	-0.544367	0.0227432	0.462775	0.269753	0.176066	0.221767	0.285125	1.53074	-0.787164	-0.578135	1.70321	-0.603797	-0.899158
ABCC8	-0.273174	-0.292485	-0.700286	-0.345799	0	0.716674	1.25181	1.15691	1.35678	0.250003	-0.159348	1.4973	-0.436573	-0.715465	1.70546	-4.28289	0.0285807
ABCC9	-0.192117	-0.656641	-0.120873	0.021594	0.297044	-0.0588779	0.0416584	0.182252	0.0511343	0.692512	-0.117778	1.14603	0.351255	-0.240071	-0.722019	-0.107773	0.0707431
ABCD1	-0.433922	-0.436671	-0.347911	-0.220305	-0.538502	0.361948	0.690221	-0.178686	0.527654	0.629045	1.05817	0.0866346	-0.452136	-0.183235	0.0609471	-0.0207855	-0.376357
ABCD2	-0.20335	0.0700397	-0.14356	-0.287502	0.683816	0.0221548	0.478014	-0.254208	0	0.630672	-0.290189	0.14913	-1.83802	-1.44348	0.285778	-2.0611	0.909113
ABCD3	-0.194539	-0.0701897	-0.28282	0.243779	-0.221274	-0.963821	-0.770601	-0.671167	-0.107563	-0.503773	0.944596	0.00768017	0.470463	2.25679	0.416464	1.25882	-0.149833
ABCD4	-0.189276	-0.0878191	0.302374	0.12537	0.297106	-0.0461042	-0.122632	-0.0200639	-0.132245	-0.10192	-0.123106	-0.591439	-0.0161567	-0.384895	-0.0818737	0.725854	0.0940628
ABCE1	-0.207523	-0.404114	-0.343768	-0.0694022	-0.131141	-0.421483	-0.0140705	-0.315759	-0.182115	0.06424	0.364208	0.0304947	0.569179	-0.0723255	-0.594319	0.267461	-0.155644
ABCF1	-0.501905	-0.397019	-0.381645	-0.132751	0	-0.247747	0.188736	-0.247375	0.0499067	-0.272781	0.578962	0.18789	0.332438	0.307306	0.0912218	0.268298	-0.00756931
ABCF2	-0.655988	-0.397594	-0.34577	-0.443414	-0.162099	0.0705853	0.283245	0	0.0710697	-0.260013	0.979867	-0.0970135	0.330802	0.257835	-0.196818	0.400412	0.206653
ABCF3	-0.626812	-0.728953	-0.528695	-0.575156	-0.147885	0	0.585003	0.28897	0.405048	0.447146	1.17547	0.297874	-0.089817	0.0144987	-0.101011	-0.350186	0.025569
ABCG1	-0.64636	-1.39079	-1.15711	-0.585008	-0.0755711	-0.400119	0.490479	0	0.698439	-0.419363	1.25252	0.662047	1.06803	0.4038	1.10122	-0.2863	0.563515
ABCG2	0.025784	-0.00484276	1.44687	0.622788	0.396422	0	-1.17263	0.543577	-0.406536	0.39122	-1.37626	0.262771	-1.10872	-0.420457	-0.850296	-1.06433	0.173005
ABCG4	-1.32499	-0.508783	-0.765142	-0.489429	-0.0785336	0.186098	0.596504	0	-0.00248146	0.0192199	2.00343	0.389822	0.870485	-1.25229	1.9997	-1.40368	1.0322
ABCG5	-0.71038	-0.801578	-0.585372	-0.128169	-0.317969	0	0.563298	0.255637	0.161873	0.22579	0.250937	-0.0438485	0.0203524	0.168449	0.121762	-0.251681	-0.246193
ABCG8	-0.281664	-0.751215	-0.639993	-0.259025	-0.271358	2.86394	0.761735	1.10448	0.452981	0.439466	0.568573	-0.300683	-0.42902	0	0.15067	-0.249171	0.293114
ABHD1	-0.882029	-0.472739	-0.775876	0.0806055	0.216331	0.0111732	0	-0.140037	0.678337	-0.463697	1.1178	0.0505323	-1.10604	-0.128212	1.16133	0.210542	-0.916643
ABHD10	-0.217288	-0.567966	-0.448544	-0.0906291	-0.0407686	0.592678	0.936079	0.701049	0.660612	0.977917	0.770749	0.403856	-0.230796	0	0.335475	-0.042016	-0.322658
ABHD11	-0.568472	-0.55725	-0.385527	0.124272	0.0857511	0.00812451	0.98291	0.478566	0.033687	0.333497	0.806011	0.569641	-1.5841	-0.388697	-0.587514	-0.58785	0.0915189
ABHD11-AS1	-1.36555	0.0496931	-0.256473	0	-1.22756	-0.073772	0.551018	0.584438	0.402139	1.14672	0.943899	-0.362475	-1.20098	0.157057	-0.395213	0.544907	-0.622881
ABHD12	-0.632351	-0.557666	0.27802	0.0228033	-0.118667	-0.0924005	0.702198	-0.0166602	0	0.0365105	0.401487	-0.0416875	-0.593562	-0.605814	0.207922	0.374698	0.23846
ABHD12B	-0.555665	-0.680921	0.215263	-0.419234	-0.416338	0.833447	1.0322	0.427639	0.722185	0.305765	0.411108	0.053411	0.214236	-0.23878	-0.0648303	0.196631	0.075079
ABHD13	0.200376	0.744246	0.575659	0.503065	0.193304	-2.39945	-1.07399	-2.03257	-0.956048	-2.05812	-1.1942	-0.140609	1.0734	0.541547	-0.325516	0.409221	0
ABHD14A	-0.0256491	-0.918847	-0.110769	-0.516071	-0.0798659	-0.0493851	0.658829	-0.0425601	0.170675	0.762703	0.658351	0.369236	-0.00152874	-0.0843086	0.183441	0.0050807	0.376095
ABHD14B	0.23517	0.0969467	-0.243568	-0.493546	-0.347756	0.752093	0.22596	0.854726	0.114556	0.528315	0.438177	0	-1.20987	-0.988911	-0.022078	-1.67567	-0.959238
ABHD15	0.59592	0.370479	0.0739064	-0.0987287	-0.153588	0.0891929	-0.762337	-0.704719	-0.561091	0	-0.0396309	-0.477484	0.469538	-0.772279	0.715398	0.461321	0.430363
ABHD16A	-0.256516	-0.55606	-0.192024	-0.273715	-0.351015	0.344877	0.514222	0.772387	0.60758	0.089035	1.11095	0.331616	-0.376406	0.326924	-0.861966	0	-0.226078
ABHD16B	0.492101	0	0.502154	0.26784	0.317884	-0.899071	-0.49377	-0.720579	-0.767705	-0.431852	-0.147272	-0.659144	0.620491	1.2505	0.319252	-0.201876	0.783993
ABHD2	-0.899044	0	0.24859	0.160911	-0.64168	-0.0902252	0.498219	0.126984	-0.411229	-1.04337	0.775092	-1.21076	1.17541	0.991798	-0.434999	1.13643	-0.110116
ABHD3	0.871338	0.51947	0.217717	0	-0.279145	0.355972	0.0591631	0.264433	0.747222	-0.340855	-1.58686	-0.204888	0.0888224	-1.13271	-0.898537	-0.615079	-0.0472622
ABHD4	-0.909381	-1.10281	-0.383298	-0.638283	-0.368032	0.0433512	0.424175	0.176156	0.318792	0.276167	0.429853	0.0456982	1.43449	-0.208578	0	-0.00889873	-0.0324907
ABHD5	-0.287818	-0.5283	-0.344498	-0.153475	-0.0324068	-0.353264	0.228027	-0.232314	0.180558	-0.0704098	0.864044	0	0.361035	0.138684	0.163177	0.956715	0.440769
ABHD6	0.440077	0.241334	0.333664	-0.0751305	0.318615	0	-0.101001	-0.106631	-0.281328	0.549066	-0.276612	-0.114347	0.153353	-0.317145	1.41539	-0.586913	0.488009
ABHD8	-0.537499	-0.719434	-0.712343	-0.59195	-0.7068	-0.0790882	0	-0.149652	0.0776062	0.240932	0.0495338	0.0541925	0.0715933	-0.798248	0.310979	0.00622749	0.271029
ABI1	0.0052743	-0.0475049	0.0183949	0	-0.153347	0.265822	0.194676	0.163651	-0.153813	0.0557208	0.207871	-0.244251	-0.0279827	-0.286805	-0.731915	0.069674	-0.112275
ABI2	-0.53222	-0.501558	-0.434567	-0.0026617	-0.132819	0.18077	0.59589	0.152056	0.356351	0.339272	0.0289087	0.0393476	-0.72256	-0.50751	0	-0.511326	0.414229
ABI3	0.51746	-0.160342	0.363898	0.0816851	0	0.329091	-0.136914	0.0160341	0.459755	-0.460809	1.22317	-0.715371	-0.0522347	0.461756	-2.03509	-0.194728	-0.791865
ABI3BP	0.677032	1.74141	1.76135	1.47319	0.218607	1.33652	-0.609996	0.207487	0.94349	0.0273158	-0.0270254	-0.725177	-1.09937	-1.34215	-1.5053	-1.54205	-1.45262
ABL1	-0.44133	-0.961589	-0.178785	-0.44835	-0.747475	-0.173728	0.47451	-0.237442	0.0181248	0.340317	0.628022	-0.0198271	0.434035	0.331356	-0.409153	0.369119	-0.600401
ABL2	-0.167994	0.239545	-0.220672	0.0475253	-0.352314	0.334721	0.0980644	0.35517	0.137007	0.206393	-0.123477	-0.0491256	0.869982	-0.260739	-0.285525	-0.0659449	-0.401039
ABLIM1	-0.736332	-0.644019	-0.420657	-0.320484	0.133019	-0.177301	0.576926	0.0727434	-0.0336339	0.343891	0.207478	0.94346	0.538618	0.199712	-0.226568	0.0925897	0.41006
ABLIM2	-0.733471	-0.400772	-0.0816938	-0.214253	0.524594	0.208887	0.160593	-0.309722	0.519171	-0.245777	1.9823	-0.000364622	-0.019028	0.375036	0.239789	0.748069	0.172903
ABLIM3	-0.718401	-0.274943	-0.299469	-0.514194	-0.160421	0.264615	0.656099	0.563786	0.299928	0.472033	-0.044775	0.305352	-0.39211	-0.415916	0.833779	-0.427859	0.438278
ABO	-1.67413	0.0406985	-0.29017	-1.55003	-0.499865	0.565712	0.41055	0.665526	0.944729	-1.14237	0.441463	0.227228	-0.382624	-1.4323	0.0771532	0	-1.19086
ABP1	-0.517935	-1.34488	0.340674	-0.897165	0.444889	1.01325	-1.11302	0.69716	-1.32663	-0.690511	-0.0650229	0.332098	0	0.66088	-0.619734	0.311636	0.348975
ABR	-0.461818	-0.549864	-0.288553	-0.367305	0.114469	0	0.200986	0.110615	0.206067	0.440202	0.240578	0.478504	-0.184854	-0.575712	0.242694	-0.472395	0.416365
ABRA	-0.93019	0.157989	-0.786726	-0.806561	0	-0.725306	-0.531304	-0.442034	-1.15803	0.526915	2.00481	-0.980636	1.53004	2.34103	0.585422	4.84903	1.21276
ABT1	0.0598426	0.236788	-0.14284	0.272895	-0.396956	0.310131	-0.987541	-0.652454	-0.430696	-0.727877	0.0638905	-1.19484	0.512832	-0.383071	0	0.25785	0.175528
ABTB1	-0.223329	0.063662	-0.124198	-0.229802	-0.44767	0.589363	0.224997	0.57817	0.528068	0.413804	-0.12804	0.126791	-0.551196	-1.02548	0.33552	-0.563243	0.0101166
ABTB2	-1.06683	0	-0.112169	0.727583	-0.161573	0.100658	-0.232366	0.176886	0.778006	-1.02497	1.00365	-0.729	-0.482827	0.118353	0.645983	0.0458698	-0.514334
ACAA1	-0.439414	-0.518412	-0.785251	-0.334875	0.0871792	-0.370826	0.178676	0.0028038	0	0.142198	0.400462	0.273439	-0.26227	0.0126104	-0.0505047	0.153555	-0.167149
ACAA2	-0.470007	-0.136549	-0.541666	0.310906	0.607786	-0.998997	-0.011322	-0.476268	-0.605223	0	0.389952	-0.436729	0.193097	0.961405	0.216611	1.03323	1.09609
ACACA	0.600599	0.318807	0.0229421	0.00943518	0.0756915	-0.0988856	-0.497441	-0.320448	-0.0360751	-0.218675	-0.508273	0.0634999	0.289998	-0.444996	1.44252	-0.353708	0.442285
ACACB	-0.563822	-0.463682	-0.384803	-0.0783408	-0.540385	0.581589	-0.127587	1.27231	0.163859	0.714861	-0.854016	-0.162219	-0.141844	-0.0152934	0.870631	0.252951	0.275235
ACAD10	-0.111024	-0.0655956	-0.117054	0.175894	0.478444	-0.156837	0.0834916	-0.0981317	0.0369492	-0.297167	-0.0802786	0.59839	-0.284442	-0.628525	-0.0410376	0.107038	0.268981
ACAD11	-0.281799	0.422531	0	0.544571	-0.155187	0.16012	0.386262	0.276897	0.105704	-0.0949335	-0.42752	-0.584534	-0.231792	-1.23031	-0.270255	0.0546246	0.78295
ACAD8	-0.537318	-0.337604	-0.368897	-0.0644422	0.240972	0.772736	1.11811	0.847029	0.673806	0	0.610301	0.308321	-0.653045	-0.708018	-0.313425	-0.464714	0.448472
ACAD9	-0.472486	-0.600501	-0.590077	-0.588768	0.156113	-0.411609	0.103979	-0.105165	0.0683489	0	0.448609	0.35053	-0.321979	0.208985	0.00997114	0.0297165	0.0323663
ACADL	0.356505	0.992255	0.422771	0.201885	-0.108054	0	-0.681024	0.229061	-0.115997	0.667894	-1.1827	-0.479808	-1.07883	-0.726452	2.16459	-2.16829	1.56446
ACADM	-0.594211	-0.0240116	-0.739613	0.252088	0.301578	-0.813976	-0.248573	-0.179969	0	0.0475492	-0.434132	0.298077	-0.130659	0.175629	0.260766	0.543156	0.560003
ACADS	-0.955881	-0.881752	-0.815229	-0.473672	0.158854	-0.456345	0.553832	0.137858	-0.528311	0.331417	1.03559	0	-0.246751	0.353888	-0.370477	0.456841	0.288415
ACADSB	-0.255664	-0.258343	-0.314712	0.0044074	0.301763	-0.337577	0.354591	0.245392	-0.0124965	0.0145636	0.473442	1.05176	-0.231083	0.181817	-0.0969548	0.296911	0.31065
ACADVL	-1.11218	-0.998088	-1.01994	-0.43856	-0.0214529	-0.234413	0.622708	0.0400953	0.0528898	0.708532	1.29319	-0.271139	0	0.798323	-0.028348	0.889279	0.592574
ACAN	0.0676172	-0.593449	0.775381	0.927335	-0.502293	1.01685	-0.61205	0.0830741	-0.183024	0.066947	0.209319	-0.69658	0.0736666	0.0706921	-0.432859	-0.0926662	0.208444
ACAP1	2.53841	2.48587	1.90727	1.72606	0	2.19523	0.277639	1.2724	1.81057	-0.10569	-2.42082	-2.79102	-1.78635	-3.00296	-2.39653	-3.23761	-2.21766
ACAP2	0.461456	0.221008	0.180145	0.385976	-0.219712	0.459753	-0.197646	0	0.172922	-0.00794935	-0.446054	0.242542	-0.605932	-0.448222	0.071588	-0.372972	-0.648097
ACAP3	-0.194635	-0.225971	-0.160565	-0.310573	-0.127234	-0.147288	0.0509362	-0.00070143	0.22585	-0.0572753	0.224294	0.171394	-0.00897169	0.156556	0.367027	0.276776	-0.0242534
ACAT1	-0.443322	-0.436357	-0.30707	-0.00650597	0.719572	-0.529901	0.307257	0.11693	-0.221721	0.088295	0.196075	0.633108	-0.167204	0.0247949	-0.578035	0.341151	0.81327
ACAT2	0.490421	0	0.427178	0.00610447	-0.0257502	-0.165178	-0.00139332	-0.394001	-0.131486	-0.034771	0.317888	-0.00782108	-0.328539	0.10964	0.358895	0.660078	0.381503
ACBD3	-0.656863	-0.359058	-0.449263	-0.171694	0	0.369298	0.502045	0.113509	0.167688	0.185036	0.797599	0.0538626	0.0377531	-0.172806	-0.683009	-0.483506	-0.0611877
ACBD4	0.851825	0.12001	0.65722	0.691189	0.645091	-0.981151	-1.01272	-0.713148	-0.733978	-1.18708	-0.734638	-0.224274	-0.28065	-0.390842	0.415521	-0.625997	0.629503
ACBD5	-0.356337	0.0978732	-0.00334978	0.406578	0.720819	-2.25209	-1.83385	-1.9245	-2.07712	-1.73861	-2.21134	-0.127196	0.255269	-0.177966	-0.355853	-0.210382	0.679414
ACBD6	-0.286513	-0.558065	-0.384014	-0.377007	0.064724	-0.998955	0.196548	-0.130036	-0.0720949	0.399408	0.688191	0	-0.0355997	0.559251	0.374473	0.0434704	0.0913067
ACBD7	-0.309345	0	0.128491	0.396168	0.352946	-2.35508	-0.736328	-1.33041	-1.54175	-1.39	-1.0429	0.323238	0.153584	0.472713	0.275575	0.358248	-0.0743818
ACCN1	0.273758	-0.00586605	0	1.15627	0.409909	-2.32906	-1.98135	-1.74321	-2.26423	-1.93955	-2.13947	0.12103	0.294513	0.231912	-0.244048	0.192365	0.537539
ACCN2	-0.371204	0.526587	0.480561	-0.492186	0.0887632	1.22057	-0.255412	0.212585	-0.243448	0.303685	0.253935	0	-0.53777	-1.73354	2.09714	-0.800496	-0.489014
ACCN3	-0.239078	-0.236258	-1.07814	-1.09707	-0.399357	0.433192	0	0.62363	0.38799	0.13006	0.232724	-0.045651	0.475159	0.170867	0.762041	-0.566519	-0.113646
ACCN4	1.5725	0.409037	1.23903	0.346892	0.994699	-0.903323	-1.12838	-0.909452	-0.705582	-1.5632	-0.93431	-0.0120382	0.549722	0.452149	-0.150675	0.141814	0
ACCN5	-0.156508	-0.52565	-0.405438	-0.0232778	-0.00456905	0.671502	0.973755	0.748022	0.706415	1.18552	0.8191	-0.0619874	-0.194984	0.0445218	0.381086	0	-0.304341
ACCS	0.529996	1.07123	0	0.568912	-0.0468769	0.962244	-0.0773535	0.627017	0.647214	-0.0150084	-0.52659	0.160506	-1.83565	-0.668186	0.428755	-1.17031	-0.554478
ACCSL	-0.202332	-0.210505	-0.455294	-0.0721617	-0.0440874	0.655508	0.932915	0.706933	0.668271	1.14949	0.781586	-0.107283	0.293741	0	0.340204	-0.043448	-0.346719
ACD	0.139164	0	0.220741	0.070549	-0.136738	0.162456	-0.0263128	0.316488	0.245327	0.262681	0.220158	-0.183112	-0.106859	-0.137652	-0.1472	-0.0995102	-0.509571
ACE	-0.113048	-0.312123	-0.133389	-0.0870888	0.28811	0.249733	0.162042	0.406527	0.826053	0.369449	0.867799	0.459773	-0.143028	-0.0835733	0.106049	-0.09571	0.0516684
ACE2	0	0.167375	0.0952311	2.1044	-0.616112	-0.285074	1.01341	1.23288	0.878757	1.33236	-0.078722	-0.161986	-2.04298	-0.281239	-0.690117	-0.482578	0.972712
ACER1	-0.0952849	-0.672908	0.116679	0.49546	0.264308	-0.818593	0	-1.40384	-1.5042	-1.47116	-1.37736	0.827733	0.855896	0.0727134	-0.215086	0.345413	0.187475
ACER2	0.151563	0.402689	0.238677	0.000123	0.498088	-0.349403	-0.391418	-0.560855	-1.45125	0.362408	-1.12432	0.487394	0.363782	-0.358793	-0.41471	0.397764	0.351555
ACER3	-0.301723	-0.483994	0	-0.457515	-0.570771	0.290999	-0.793584	0.289656	1.47768	1.02814	0.343801	0.122715	-0.00460005	0.0428791	-0.72016	0.125988	-0.855356
ACHE	-0.596225	-0.475821	-0.374864	-0.242061	0.183902	-0.627919	-0.0327892	-0.272349	-0.379456	0.00629616	0	0.499865	0.224341	0.198194	1.1476	0.156568	0.399182
ACIN1	-0.218711	0	-0.124252	0.359836	0.057025	0.0118809	0.44367	0.445265	1.14245	0.113214	-0.488138	-0.477107	-0.0984201	-0.439108	-0.0394964	-0.138627	0.0722666
ACLY	-0.0355411	-0.408989	-0.443097	-0.273628	0.0169778	0.407947	0.10719	0.259697	0.276518	-0.0664568	0.92783	-0.509046	-0.0407	0.0590072	0.936034	0	-0.508041
ACMSD	-0.272459	-0.610099	-0.488641	-0.15196	-0.100582	0.662297	0.899743	1.41184	0.595812	0.682167	0.714477	0.654146	-0.211409	0	0.325721	-0.0272431	-0.306687
ACN9	-0.384255	-0.508937	-0.465838	-0.331363	0.457554	-0.394579	-0.162471	-0.240149	-0.379611	0.0503454	0.660289	0	0.319779	0.116881	0.569283	0.229416	0.270522
ACO1	-0.686319	-0.392356	-0.571935	-0.149097	0.470184	-0.486644	0.149174	-0.239285	0.0461826	0.0465355	0.89643	0.444119	0.389236	-0.0916462	-0.19229	0	0.401091
ACO2	-0.516918	-0.690459	-0.472989	-0.223436	0.270845	-0.568654	0.561933	-0.0248413	-0.171908	0.210138	0.696252	0.173606	0	0.238188	-0.0692844	0.283818	0.394556
ACOT1	-0.307849	-0.270799	-0.392626	-0.177324	0.383637	-1.61485	0.0970325	-0.415756	-0.368683	0.40235	1.04691	0	0.022501	0.749766	0.0556726	0.712723	-0.0852528
ACOT11	-0.76165	-0.587586	-0.495424	-0.0686448	0.586992	0.205883	0.0614691	0.100713	0.111594	0.188285	0.874083	0.626498	-0.185005	-1.42478	0.0185602	-1.72333	0.287603
ACOT12	-0.312777	-0.666731	-0.562401	-0.178686	-0.220829	1.52936	0.845241	0.659088	0.529932	0.637759	0.62125	-0.0789981	-0.209168	-0.0171704	0.367848	0	0.895506
ACOT13	-0.376983	-0.774728	-0.595006	-0.440774	0.142954	-0.601549	0.147979	-0.184419	-0.12153	0.359035	0.790291	0	0.549925	-0.21815	0.373779	0.21704	0.294699
ACOT4	0.578519	-0.376618	0	-0.458256	0.281991	0.431331	0.532806	0.258661	0.00471926	-0.108994	0.336483	0.455336	-1.936	-1.28101	-0.121803	-2.01282	-0.89445
ACOT6	-0.210603	-0.59215	0.679367	-0.0851173	-0.0687609	0.511868	2.39761	1.36729	0.67357	0.907892	0.991301	-0.0825987	-0.220355	0	0.359802	-0.0194855	-0.33989
ACOT7	0.524444	-0.246128	-0.0329943	-0.0374928	-0.0477562	0.346232	-0.227223	-0.0497131	-0.251122	0.206715	0.910322	-0.57567	0.552709	0.356591	0.141176	0	0.552696
ACOT8	-0.429789	-0.387212	-0.489298	-0.0475075	0.0862517	-0.977118	0.0296159	0.0580118	1.83931	-0.0969648	1.36518	0.0305743	-0.341382	0.034467	0.589971	0.0680037	0.303838
ACOT9	-0.695225	-0.320828	-0.316316	0.0041914	-0.155271	-0.277456	0.215862	-0.250779	-0.239779	0.133873	0.322505	-0.24292	0.0657506	0.569477	0.70164	0.804912	0.570212
ACOX1	-0.245242	-0.397556	-0.563976	-0.185174	0.487382	-0.402206	0	-0.190469	-0.0852737	-0.190901	0.474814	0.0166912	0.877857	0.628927	0.869689	0.640022	0.912065
ACOX2	-0.209363	-0.609619	-0.21939	0.0902805	0.456591	-0.652664	0.0941114	-0.245066	-0.514156	0.0679264	0.0545483	0	0.154999	-0.993939	0.18149	-1.32541	0.985435
ACOX3	-0.00742435	-0.317678	-0.583983	-0.809598	0.254507	-0.172226	-0.182037	-0.660058	0.70242	0	0.567801	-0.300491	0.340673	0.212417	1.17164	0.424125	0.16827
ACOXL	0.141954	0.62198	0.456719	0.441627	-0.774156	-0.0374937	0.151663	0.130711	0.790782	-0.0116041	-0.167344	-2.44675	-1.97633	-1.99432	-0.113517	-1.83364	-0.50538
ACP1	-0.326537	0.187326	0.0219332	-0.0922867	0.0931152	-0.0631053	0.332335	0.0417042	-0.367466	-0.0448672	-0.00700061	0.111834	0.184538	-0.206554	-0.0888472	0.130629	0.269395
ACP2	-0.234821	-0.430623	0.129643	0.0359778	0.0828662	-0.0910742	1.00216	-0.0971315	0.0489736	-0.504959	0.874556	-0.199514	-0.221363	0.221369	0.265196	-0.0741606	0.129167
ACP5	2.20503	1.17836	1.59597	1.14959	0.749408	1.10302	-0.292869	0.668145	2.06231	-0.620039	0	-1.81977	-0.899534	-3.34967	-2.59298	-2.13312	-2.43996
ACP6	-0.352319	-1.55633	0	-0.157685	0.0926928	-0.256046	0.508054	0.035491	0.403359	-1.31575	1.34366	0.516839	-0.655604	0.402811	-0.177393	0.831288	-0.741615
ACPL2	-0.356652	-0.076452	-0.0927298	0.477186	-0.162378	-0.0184011	-0.302851	0.0798001	0.13793	-0.334666	0.310264	-0.330383	-0.0745921	0.297808	-0.278255	0.873909	0.0766904
ACPP	0.812723	-0.470616	-0.461035	0.192776	-0.254533	0.902142	0.810758	0.359492	0.266773	0.414828	0.380218	-0.490644	0.060276	0.292499	0.861742	-0.149078	-0.490202
ACPT	-0.610169	-0.498942	0.34015	-0.290071	0.0944347	0	-1.43177	-0.941784	-1.74961	-1.77402	-0.745068	0.437765	0.322856	0.119987	0.391747	0.559949	0.193405
ACR	-0.583868	-0.0698063	-0.177641	-0.253226	-0.171792	-1.32501	-0.887378	-1.28605	-0.229767	-0.69045	0.29823	0.149292	0.360001	0.581423	0.664751	1.02793	0.446199
ACRBP	0.526557	0.146292	0	0.294913	-0.453861	0.674133	0.0094409	-0.188586	0.0995564	-0.695321	-0.870092	-1.46807	0.0276651	0.93788	-2.55764	-0.787749	-1.40225
ACRC	0.397398	0.410834	0.583836	0.234092	-0.741569	0.631295	0	0.29319	0.144187	-0.257136	-1.08784	-0.536424	-0.13733	-0.103916	-1.57946	0.95536	-1.10507
ACRV1	-0.146929	-0.479599	-0.376444	0	-0.0294938	1.31265	4.18747	0.846035	1.40962	0.853499	0.808943	-0.0939722	-0.219429	0.389986	0.374607	-0.0295777	-0.334823
ACSBG1	-0.320863	-0.116386	-0.538776	-0.0651762	0.126601	-0.160418	-0.338182	1.41629	0.1124	-0.0172341	-0.550334	-0.0321543	-0.130518	0.0106552	0.469769	0.0288162	0.237877
ACSBG2	-0.886494	-0.417641	-0.0550585	-0.837529	-0.95568	0.0575528	0.605648	0.476626	1.23154	0	0.458848	0.76632	-0.258315	0.150974	-0.580072	0.202495	-0.705189
ACSF2	0.0705085	-0.292841	-0.521415	-0.597264	-0.144489	0.591456	0	0.268035	0.390863	-0.0337796	0.159712	0.141214	0.259816	-1.40207	1.78197	-0.62846	-0.106662
ACSF3	-0.206814	-0.245712	-0.181867	-0.253536	0.134485	0.315726	0.0833855	0.311759	0.265856	0.395594	0.946415	0.171078	-0.0777981	-0.458058	0.362298	-0.341458	0.193844
ACSL1	-0.718416	-0.598737	-0.597992	0.380591	0.246137	0.0036993	0.912596	0.683098	0.609087	-0.21047	1.56093	-0.389791	-0.148871	-0.157232	0.493884	0	-0.0872335
ACSL3	0.073019	-0.0944023	0.107096	-0.120651	0.344402	-0.476686	0.208714	0	-0.100996	0.396011	0.0256271	0.276627	-0.15399	-0.69604	-0.390877	-1.36605	0.536379
ACSL4	-0.173692	-0.29167	-0.199671	0.255113	-0.387343	-0.166993	0.371388	0.037406	-0.0363817	0.104181	0.133409	-0.284904	0.219277	0	-0.132266	0.306436	0.215753
ACSL5	1.26842	0.612899	0.753431	0.421061	-0.0716381	-0.0880327	-0.137048	0.134319	0.374941	-0.320092	-0.0472574	-0.675436	0	0.678308	-0.566025	0.0707893	-0.486043
ACSL6	0.287971	0.37377	0.0446592	-0.00114823	0.0577569	0.802329	-0.04883	-0.0934901	-0.53117	-0.196796	-0.161531	0.608353	-0.463393	0.0584223	1.40915	-0.726952	-0.318912
ACSM1	0.20413	1.47556	1.27776	1.18776	-0.165406	2.54539	-0.579401	1.44643	0.0906811	0.244413	-0.856345	0	-1.13632	-1.65825	-1.18753	-1.4624	-0.845562
ACSM2A	-0.276599	-0.635514	-0.509463	-0.139883	-0.120494	0.536341	0.901231	0.975037	0.682922	0.689658	0.719833	-0.0666232	-0.183354	0.0168476	0.392817	0	-0.270408
ACSM2B	-0.0366402	-0.177245	0.613739	0.288658	0.515702	-1.10179	-0.653138	-0.820666	-0.941793	-0.921007	-0.83027	1.02473	0.107337	0	1.05616	0.207947	0.293988
ACSM3	-0.823567	0.0207596	-1.24142	0	-0.736481	1.43581	1.64684	1.18612	1.27216	0.503337	-1.88199	0.316525	-1.83842	-2.41014	-1.38679	-0.543938	0.408197
ACSM4	-0.15869	-0.507847	-0.0441823	-0.0165691	0	1.1624	0.974273	0.758889	0.697404	1.06392	0.814406	-0.102976	-0.211799	0.0187006	0.344259	-0.0246658	-0.323285
ACSM5	0.499109	0.158878	-0.413518	0.145331	1.67746	2.2033	-0.0960185	-0.784438	-0.700485	-0.491174	-1.05248	1.7735	-0.566058	-0.634579	0.120867	-1.45514	1.65204
ACSS1	0.0735688	-0.381618	-0.244342	-0.550865	0.490317	-0.0612831	0.596469	0.532803	0.60602	0.174085	0.217685	0.813095	-0.326842	-0.319588	-0.382426	-0.100178	0.10902
ACSS2	-1.06149	-1.03692	-1.17102	-1.04992	0.0242481	-0.480653	0.790079	0.0931215	-0.0743866	0.186915	1.04865	0.584967	0	-0.83081	0.0714073	-0.341229	0.0175104
ACSS3	-0.676036	-0.13358	-0.807185	-0.420669	0.115582	-0.180958	0.264524	0.289271	-0.0783463	-0.154749	0.31124	0.504404	1.07611	-0.239249	0.523842	0	0.222141
ACTA1	-0.4074	-0.150685	-0.373042	0	0.00119209	-0.435384	0.519504	0.107096	0.173309	-0.0211992	0.268825	-0.283988	-1.87612	0.384589	-0.829186	0.238312	0.0826206
ACTA2	-0.0506048	0.221802	-0.3069	0.1858	0.0729551	-1.00915	0	-0.654626	-0.600552	-1.07255	0.69841	0.205151	-1.59664	1.07689	-0.575775	0.143273	0.830255
ACTB	0.412764	-0.0391607	-0.0442696	0.151242	-0.371017	-0.0670915	0.292585	-0.01684	0.393216	0.0703878	0.397902	-1.0778	0.456816	0.482926	-0.615788	0.23471	-0.945358
ACTBL2	0.491267	-0.309852	0.131666	-0.475996	0.337621	-1.67938	-0.0920258	-1.22316	-1.14016	-0.957081	0	-0.493818	0.397067	0.634177	0.414669	0.406116	0.685445
ACTC1	-0.169197	0.318593	0.366197	0.418845	0	-0.286189	-0.0885	0.186032	0.278828	-0.0264769	-0.0457373	0.876149	-2.2892	0.417677	1.2728	-2.49466	-0.23982
ACTG1	0.837168	0.376106	0.393293	0.211205	-0.00545502	0	-0.0948381	-0.720966	-0.309809	-0.621766	0.670588	-1.22623	1.0402	1.24828	-0.55669	1.06717	-1.04769
ACTG2	1.38093	-0.47873	0.126632	0.369798	-0.860607	-0.115806	-0.888089	-0.190421	-0.37365	-0.0651536	0.90434	-1.10903	1.49448	0.498739	0.113784	0.182416	0.181673
ACTL6A	-0.31716	-0.477619	-0.494929	-0.241609	-0.15028	0.123193	0.355616	-0.0283775	0.247303	0.634246	0.848418	0.379578	0	0.136112	-0.707563	0.0246525	-0.104837
ACTL6B	0.254445	-0.407969	-0.124579	-0.117794	0.273395	-0.567447	-1.40192	-1.16019	0.0974722	-0.793415	-0.581303	0.00623608	0.73013	1.04559	0.261764	0	0.440198
ACTL7A	0.231567	0.320868	0.455366	0.70358	0.274357	-0.950045	-0.41863	-0.315254	-0.132044	-0.736655	-0.947768	0.208997	-1.25145	-1.40123	0.0907512	0.15542	0
ACTL7B	-0.172451	-0.538166	-0.434699	-0.0398726	-0.0578985	1.26629	0.994963	0.771895	0.703241	0.71629	0.79557	-0.0371842	-0.193777	0.019979	0.403686	0	-0.0169468
ACTL8	-0.124345	0.52135	0.591079	0.523731	0.302691	-0.815906	-0.481287	-0.519993	-0.884382	0.438292	-0.836239	-0.461738	0.334811	0.252483	0.461667	0.276747	0.502606
ACTL9	0.177884	-1.08629	-0.69234	-0.185957	0.0198555	-0.984049	-0.707033	0	-0.976648	-0.542627	0.165412	0.875672	-0.0213594	0.53999	0.334321	0.167116	0.746429
ACTN1	-0.39584	-0.447078	-0.42831	-0.0458756	-1.26098	0.381827	0.257014	0	0.458899	0.948941	0.856583	-1.25549	0.426467	-0.120628	0.0769424	0.0249443	-0.456648
ACTN2	-0.397665	-0.502253	-0.45982	-0.0191593	0.0985317	-0.161006	0.913662	-0.499569	0	0.57451	0.862475	0.567269	-0.14524	0.545061	-0.315651	0.210051	0.410634
ACTN3	0	-0.0529699	-0.0448446	0.123051	0.62983	-1.58717	-0.570457	-1.79731	-1.47499	-0.697734	-0.369162	1.00543	0.392659	1.03519	0.337512	1.08958	0.726421
ACTN4	-0.263315	-0.38101	-0.317746	-0.718707	-0.690043	0.100602	0.320092	0.056037	0	0.719351	1.05266	-0.479039	0.316037	0.374044	-0.941689	0.269711	-1.01104
ACTR10	0.221909	-0.00932693	-0.317168	0.390329	0.0702343	-0.291301	0	-0.18956	-0.42423	0.13745	0.500223	-0.0995536	-0.0431418	0.963042	0.452765	-0.340266	0.0285182
ACTR1A	-0.673468	-0.931417	-0.55431	-0.57765	-0.544266	-0.0311623	0.742209	0.118869	0.237178	0.471259	0.852023	0	0.150343	-0.21188	0.121214	-0.13671	0.0699453
ACTR1B	-0.844768	-0.654813	-0.558916	-0.702501	-0.28299	0.035944	0.814844	0.159812	0.088809	0.350205	0.953575	-0.071867	-0.445154	-0.0768862	0.00291634	0	0.405158
ACTR2	1.01872	0.315145	0.230152	0.505144	0	-1.09848	-0.978201	-0.982157	-0.470301	-0.488277	-1.39537	0.297539	-0.0275879	0.129844	-0.40949	0.114079	0.102102
ACTR3	0.168506	-0.466633	-0.430196	0	-0.398055	-0.217233	0.0479612	-0.162979	0.0657253	0.0127296	0.777435	-0.375467	0.243546	0.00364399	-0.370664	0.293544	-0.0765276
ACTR3B	-0.281135	-0.0034399	-0.253347	0.166539	-0.336342	-0.0301701	0.410908	-0.066685	-0.161268	0.0151757	0.310791	-0.203966	0.278903	0.0799848	-0.905663	1.05045	0.38175
ACTR3BP2	0	-0.897021	0.562192	0.874927	0.652273	-0.09725	-0.032372	-0.245812	-0.255717	-0.304354	-0.21965	1.06582	0.280744	0.315938	0.634408	-0.938266	0.250016
ACTR3BP5	0.731985	-0.00948524	0.691108	0.319081	1.06237	-3.17579	-1.95519	-2.35757	-1.92663	-1.8456	-2.1403	0	0.362294	0.0934744	0.0549607	-0.0421214	0.138649
ACTR3C	0.153376	0.139155	-0.0439386	-0.509855	0.128998	-0.163601	0.110942	0.184024	0.00382168	0.191246	-0.364737	0.302214	0.183862	-0.0827077	-0.178839	0.294154	0.140699
ACTR5	0.0234461	0.246369	0	-0.0321989	-0.255773	0.47702	0.62816	0.236459	0.226453	-0.00152159	-0.112638	0.199232	-0.058588	0.200338	-0.448781	-0.346373	-0.138929
ACTR6	-0.286513	-0.277344	-0.329125	0	0.00691509	0.0926027	0.444584	0.337194	0.0927839	0.0303488	0.503645	0.300022	-0.112517	-0.752992	-0.699319	-0.883747	-0.161498
ACTR8	-0.378203	-0.342554	0	-0.33082	0.581271	0.308175	0.791326	0.129555	0.0420799	0.491079	-0.128521	0.159365	-0.00785875	-0.210333	-0.390093	-0.48933	0.223458
ACTRT1	0.142172	0.685243	0	0.702039	0.757766	-3.21941	-1.66625	-2.52708	-2.16815	-3.26204	-1.01394	0.397622	-2.73302	1.24222	-1.43607	0.014905	1.08808
ACTRT2	0.486008	0.806547	0.853794	0.321712	0.61999	-0.908527	-0.745319	-0.967832	-1.02816	-0.858502	-0.328805	-0.854685	0.957273	0	1.10927	-0.460895	0.20651
ACVR1	-0.80552	-0.422525	-0.616445	-0.489821	-0.566085	0.555969	0.388381	0.136842	0.277972	0.0379732	0.387017	0.0360105	-0.674517	-0.493213	0.524206	0.0999749	-0.0563836
ACVR1B	-1.21365	0	-0.259628	-0.38587	-0.228312	-0.364063	0.0356173	0.114205	0.185867	-0.608614	0.0831332	-0.151436	0.726948	0.410939	0.433774	0.209134	-0.860426
ACVR1C	0.763624	0.968713	-0.0854184	-0.631577	-0.68795	0.516262	0.289579	0.126035	0.309922	-0.0857865	-0.0745362	-0.289128	0.940567	-1.24967	2.47087	0.129666	-0.906768
ACVR2A	0.36718	0.677623	0.419702	0.321574	0.205092	0	-0.0597591	-0.356762	0.0730729	0.393306	-0.262497	1.00707	-0.0422168	-0.156641	-0.13304	-0.223141	-0.217901
ACVR2B	-0.303827	-0.368384	0	-0.0363765	0.0314794	0.30182	0.549043	0.0498872	-0.081675	0.865001	-0.486835	0.957858	-0.0479856	-0.406114	0.1519	-0.980543	0.0287204
ACVRL1	-0.122351	-0.132665	0.12532	-0.213902	-0.411142	0.49956	1.22633	0	0.0388441	0.655107	0.909905	-1.47326	-0.142792	1.12571	-1.11648	0.420776	-0.594459
ACY1	-0.400663	-0.42084	-1.0911	-0.821126	0.429941	0.273571	0.141445	0.208509	0.650776	-0.121716	1.53374	0	-0.636499	0.294326	0.303226	-0.213963	-0.400776
ACY3	0.534747	-0.838769	0.654685	0.19101	-0.615951	-0.0715685	0.216845	0	-0.0801554	-0.0672049	0.00157785	1.12618	-0.853336	-0.228527	-0.267775	0.590574	0.964108
ACYP1	-0.0611973	-0.143302	-0.139621	-0.0303555	0.0874939	0.031764	0.0194197	0	-0.121861	0.0926771	0.188231	-0.443843	0.146773	-0.33006	0.00147152	-0.454567	0.0323563
ACYP2	-0.677673	-0.43364	-0.700042	-0.35885	0.0530891	-0.120425	0.435455	0	-0.194791	0.445338	0.665568	-0.0986242	-0.339357	0.406341	0.600212	0.579299	0.667415
ADA	0.297378	0	-0.310945	-0.357453	-0.240874	0.00957489	-0.224251	0.435217	0.551906	-0.560154	0.43836	-0.645899	0.0810461	0.372969	-0.352441	0.494565	-0.605139
ADAD1	-0.516055	-0.871388	-0.762262	-0.298922	0.542244	0.0975442	0.637748	0.427796	0.345438	0.384754	0.447367	-0.261642	-0.596618	0.62163	0	-0.409562	-0.262066
ADAD2	0.0941663	1.54142	-0.0903268	0.30914	0.225347	0.948414	-1.57548	0.484767	0.526201	1.44952	-1.12127	-0.729178	0	-0.219771	-0.162876	-0.426505	-0.269328
ADAL	-0.0498657	0.22013	-0.580605	-0.235371	0.976292	0	-0.0416527	-0.0490289	0.0699515	-0.684315	0.398462	0.56674	-0.121719	0.600366	0.62694	-0.367857	0.817907
ADAM10	-0.04461	-0.43091	-0.125134	-0.041961	-0.433702	-0.0921073	-0.33821	-0.518779	0.216369	0.192342	0.0736399	-0.0334673	1.05961	-0.0542164	0.397823	0.949592	0.183631
ADAM11	-0.95306	-1.99996	-2.86036	-3.29766	0.400864	-0.435665	0	-0.300833	-0.960573	-1.04009	2.01206	0.761763	0.867215	0.188518	2.48656	0.240769	0.735023
ADAM12	-0.314894	0.0593886	-0.0345267	0.027456	0.140351	0.210557	-0.0454119	-0.0365327	-0.504147	0.213477	-0.0823054	-0.00364812	-0.0497729	0.236814	0.0757826	0.3272	-0.256374
ADAM15	0.0781417	-0.0963531	0.0728931	-0.742537	-0.00302649	0.0866418	0.204263	-0.0218053	0.0867147	-1.08596	1.73189	-0.559307	0.483843	1.49965	-0.794883	0.515054	-0.169879
ADAM17	-0.532182	-0.227433	-0.250562	-0.135722	-0.475556	0.55895	0.234337	0.244668	0.379165	0.0127926	0	-0.294139	0.179323	0.0461702	-0.847638	0.469522	-0.45694
ADAM18	-0.19827	-0.580411	-0.471209	-0.0733724	-0.0590734	0.510894	0.965055	0.741256	0.684961	0.909398	0.789238	-0.0627341	-0.20102	0.0178647	0.377896	0	-0.322162
ADAM19	-0.524598	-0.0198269	-0.539112	0.434298	0.469271	-0.272977	-0.195536	0.0986767	0.389597	-0.0559475	2.2279	-0.291038	-0.0169392	2.04538	0.980902	2.12965	-0.299413
ADAM2	-0.150814	-0.472574	-0.375583	0.0178294	0	0.489933	1.03061	0.86085	0.898942	0.643818	0.838156	-0.102802	-0.231685	-0.0202827	0.371335	-0.0374413	-0.296978
ADAM20	0	0.44651	0.190088	-0.126987	-1.01028	0.735414	0.976092	0.791859	1.04785	0.193792	-2.50227	1.22828	-1.54148	-1.33035	-0.617795	-0.599208	-1.25695
ADAM21	-0.154132	-0.797406	0.547644	1.30841	-0.0615351	0.848912	0.449564	0.596399	0.354802	1.20174	0.22855	-0.302108	-0.673252	0.0146284	0.973409	-0.462172	0.1201
ADAM22	-0.790208	0.716796	0.900522	0.0974207	-0.186352	-0.137993	0.610257	0.471776	0.214473	-1.01422	0.544853	1.67744	-0.889767	-1.87013	-0.144771	-0.210209	0
ADAM23	-1.11843	-0.541102	-1.093	-0.961468	-0.151499	0.504635	0.327045	-0.407243	0.058918	0.118906	0.31094	0.138194	0.0838242	0.0539393	0.0652804	0.0132194	0.0158176
ADAM28	0.876872	1.32784	0.47347	0.767954	0.449413	0.855257	-0.430215	1.70518	0.65812	-0.758074	-2.67426	-1.23949	0	-1.65821	-1.76607	-0.751659	-1.94346
ADAM29	-0.181092	-0.529889	-0.410101	-0.0552068	-0.00326777	0.606059	0.976751	0.74006	0.698325	0.97333	0.807528	-0.0808005	-0.18696	0.0406523	0.376213	0	-0.27789
ADAM30	-0.320897	-0.679244	0.398232	-0.192713	-0.226088	1.81144	0.844213	1.93336	2.02461	0.593465	0.626339	-0.0813117	-0.212581	-0.0256858	0.372128	0	-0.33957
ADAM32	-1.23205	0.329629	-0.416568	0.0219407	-0.943792	0.297281	-0.0536387	-1.05932	-0.733659	-0.195925	-0.749389	0.653398	0.46497	0.650987	0.473547	1.95651	-0.494902
ADAM33	-0.151976	0.0585012	0.108679	-0.552448	0.426617	-0.417737	-0.421919	-0.846743	0.353105	-0.761791	-0.74119	0.135051	-0.675466	-0.234346	0.480624	-0.160651	-0.574887
ADAM3A	-0.243653	-0.582706	-0.460334	-0.123369	-0.0657964	0.419234	0.935663	0.695612	0.633584	0.697218	1.12894	-0.09343	-0.180636	0.800916	0.355934	0	-0.275286
ADAM5P	-0.288093	-0.640477	-0.549142	-0.162853	0.370235	0.699916	0.910579	0.689876	0.621967	0.587487	0.693896	-0.0573096	-0.207355	-0.00544023	0.370951	0	-0.333053
ADAM6	-0.156011	-0.530297	-0.425536	-0.0259376	0	0.604407	1.01814	0.796436	0.739713	0.89676	0.842141	-0.079062	-0.211131	0.00919056	0.378528	-0.0114927	-0.315806
ADAM7	0.491043	0.0233507	-0.177842	0.607358	0.319878	-0.091814	0.220572	0	-0.0623198	0.300007	0.0579538	-0.130507	-0.317172	0.315233	-0.385602	-0.736398	-1.03264
ADAM8	2.48726	1.98859	1.32932	1.34376	0.335806	1.60297	0	0.97468	1.66037	-0.0960064	-1.88131	-2.10199	-0.0452032	-1.29324	-2.99399	-0.789524	-1.96669
ADAM9	0.256207	0.288334	0	0.00388336	0.583176	-1.94903	-1.78845	-1.97666	-2.04152	-1.28717	-1.96661	1.26862	-0.130855	0.800806	-0.0433626	0.414501	0.747266
ADAMDEC1	2.27857	-0.404621	0.139375	0.810136	-0.801625	1.35572	1.45613	0	2.2196	0.0655007	0.0242133	-0.884366	-0.995473	-0.774597	-0.4564	-0.808234	-1.10723
ADAMTS1	0.251544	1.57449	-0.104601	0.607892	-0.291378	-0.672961	-0.258538	-0.617207	0	0.384984	-0.306545	-0.218572	2.03912	0.906537	0.54532	1.74646	-0.454646
ADAMTS10	0.0405874	0.44812	0.366278	-0.124995	-0.747104	1.44943	0.497951	0.654801	0.987986	0.291104	-0.31192	-0.489092	-0.990946	-0.663179	0	-0.172881	-0.483022
ADAMTS12	-0.0290561	-0.864943	-0.780929	-0.145815	0.0805364	0.187891	1.59336	0.791804	0.469457	1.84274	0.451048	-0.213746	-0.572644	-0.159409	0	0.244865	-0.340337
ADAMTS13	-0.147958	-0.152592	-0.0526638	-0.140467	0.0135493	0.509397	-0.528759	-0.0586448	-0.370661	-0.298642	-0.770196	0.486716	-0.796345	-0.0244558	0.682964	0.122254	0.414779
ADAMTS14	0.911336	0.184248	-0.504348	0.0689669	-0.164174	-0.895999	-2.17997	0	1.11579	-3.20339	-0.0135536	-0.802464	2.13544	1.53808	0.205798	0.04531	-1.19921
ADAMTS15	-0.539801	-0.914577	-0.570223	-0.411017	-0.380002	4.79518	0.611096	1.42347	0.620513	0.698388	1.49527	-0.455622	0.480778	0.90904	0	-0.392348	-0.692857
ADAMTS16	-0.13805	-0.493921	-0.395026	0	0.0235	0.583909	1.05936	0.838868	0.766303	0.741159	0.846226	-0.103133	-0.228228	-0.0161204	0.361516	-0.0306387	-0.315282
ADAMTS17	-0.270242	0.794459	1.04182	-0.729895	-1.03809	0.654764	-0.752626	-0.16682	0.769389	-0.332321	-1.13501	-1.40471	-0.418469	0.421396	0.907504	0.402376	-0.912541
ADAMTS18	-0.723214	-1.06732	-0.965268	0.698741	-0.566424	0	0.47829	0.262047	0.174431	0.17969	0.22968	0.027431	-0.795994	-0.582934	-0.223661	2.88942	-0.886284
ADAMTS19	0.589649	0.251072	0.374742	-0.129606	0	-0.318084	-0.518763	-0.279699	-2.5971	0.0930963	-0.546759	0.500584	0.0676084	0.371296	-0.335778	0.097537	-0.395179
ADAMTS2	-0.423214	-0.38639	-0.827063	0.305652	-0.274019	0.560877	0.620463	-0.119187	-0.17958	-0.300981	0.445766	0.412777	0.232206	0.465087	0.0763397	0.843943	0.017333
ADAMTS20	-0.180856	-0.526272	-0.414122	-0.0446491	-0.048409	0.489992	0.97612	0.774244	0.677275	0.759077	0.792064	-0.0583754	-0.192076	0.0262675	1.68751	0	-0.2981
ADAMTS3	0.624745	1.01408	1.47621	1.17498	-1.1764	0	-0.171159	-0.401263	-0.445903	-0.140596	-0.340576	-1.20973	1.37615	0.513232	1.05972	0.295051	-0.572659
ADAMTS4	-0.673204	1.61	-1.1693	1.26624	-1.52429	-1.5894	0.223145	-0.244878	0.324013	-0.0913227	1.32428	-2.07036	4.21484	1.99021	0	2.49229	0.372006
ADAMTS5	0.582672	-0.805188	0.854064	-0.545107	0.794563	0.372396	0.468249	0.0936608	-0.651373	0.544222	-0.0962048	0	-0.440218	-0.0254889	-1.80049	0.939243	-0.935668
ADAMTS6	0.527311	-0.396997	0.502726	-0.721983	-0.0410808	0.165108	-0.347026	1.04768	0.64654	0.59535	-0.644143	0.573954	-1.51739	-1.01738	-1.03779	-1.42847	0.203961
ADAMTS7	-0.247382	-0.211645	-0.238408	0.220903	0.209161	0.101232	0.147067	-0.0549686	-0.108204	0.0108603	-0.231677	0.176715	0.198437	0.0374705	0.522994	0.114101	0.537854
ADAMTS8	1.37212	-0.583772	0.187117	-0.348957	-0.255377	-0.54538	-1.36693	0	-0.158658	0.597433	2.80452	-0.689431	1.15775	3.44512	3.11299	1.01479	-1.41173
ADAMTS9	-0.529425	-0.478532	-0.936023	0.00607872	0.389746	-0.914557	0.484857	-0.275936	0	0.23508	2.33626	-1.07765	3.81679	2.1216	-0.357084	2.26346	-0.106541
ADAMTSL1	0.00822877	-0.383615	-0.121836	2.11342	-0.307414	0.801505	-0.0230011	-0.167406	1.39547	0.439204	0.164376	-0.446022	-0.189084	-0.339448	-0.200927	-0.11212	-0.25786
ADAMTSL2	-0.563912	1.0514	0.810938	0.526498	-1.80055	1.5005	-0.363692	-0.0869665	-0.090731	1.1931	-0.355664	-1.59913	-1.1017	-1.14591	0.319776	-0.436684	0.226421
ADAMTSL3	-0.079386	0.138515	0.596262	0.367838	0.418772	-0.19872	-0.556057	0.126053	-0.102888	-0.0410147	-0.619311	0.59016	-0.875881	-0.241404	-0.220048	0.20721	-0.473524
ADAMTSL4	-1.35432	-1.37144	-0.641084	-1.66957	-1.05478	0.429	0.617733	-0.0901496	-0.533322	0.386338	0.724924	0.263491	0.217937	-0.0939366	0.960056	-0.019912	0.0823147
ADAMTSL5	-0.209041	-0.376305	-0.31887	-0.137824	-0.0491395	-0.479091	0.430027	0.108085	-0.244852	0.27248	0.299751	0.0454206	-0.570673	0.138843	-0.578465	0.133329	0.0335012
ADAP1	0.282006	-0.113627	0	-0.296103	-0.49412	0.335298	0.328752	0.587856	0.465847	-0.206089	0.219683	0.161302	-1.06759	-0.996373	-0.989241	-0.658373	0.168346
ADAP2	1.02271	0.398403	0.143579	0.020998	-0.194218	0.649896	-0.0182858	0	0.957788	-0.297648	0.305136	-1.14214	-0.432044	-0.555252	-1.2074	0.16877	-1.31796
ADAR	0.438937	0.0167208	0.467535	0.119543	-0.175193	0.0862741	-0.214038	0	0.184589	-0.144435	-0.048214	-0.174969	0.0507107	0.0499773	-0.412188	-0.0033493	-0.420437
ADARB1	0.23984	-0.0521877	-0.429852	-0.629337	-0.0773842	0.0704446	-0.10182	-0.208136	0.142318	0.141222	0.13603	0.0346684	-0.352074	0.448776	-0.111849	0.242754	-0.396313
ADARB2	-0.317089	-0.571994	-0.293395	0.0810802	0.116133	0.208693	0.524097	-0.336263	-0.440702	-0.451011	-0.0879085	-0.305407	-0.292079	0.340019	1.34093	0.35251	-0.0657972
ADARB2-AS1	-0.523893	-1.43474	0.369273	-0.143171	0.400599	-0.411027	0.124405	-0.114882	-0.163365	-0.146141	0.662333	0.549734	0	0.137821	0.458758	0.371111	-1.12132
ADAT1	-0.333826	0.029633	-0.050559	0	1.09565	0.936879	0.00330067	0.573767	0.253679	0.255831	1.19713	-0.264862	-0.479955	-0.362078	-0.143464	-0.022655	-0.180405
ADAT2	0.201839	0.567503	0.447824	0.596378	-0.00999976	-0.471761	-0.461463	-0.378935	-0.638115	-0.426457	-1.18977	-0.0894852	0.119155	-0.160764	-0.605628	-0.408048	-0.529842
ADAT3	-0.0373707	-0.445003	-0.0229683	-0.481699	-0.0414495	0.0565081	-0.441753	-0.0531197	0.374415	0.00717926	0.494636	-0.260207	0.879447	0.32334	0.424023	0.793775	0
ADC	-0.26805	0.766021	0.149398	0.0843179	-0.136359	1.55729	-0.0190625	0.146456	1.08965	0.342027	0.161922	0.0836036	-0.414237	-1.44158	-0.38026	-0.237337	-0.0130651
ADCK1	-0.13508	-0.0159211	-0.477209	-0.245468	0	0.64251	-0.11728	0.545269	0.50647	-0.718277	0.518612	0.308833	-0.466993	0.65531	1.26376	-0.133602	0.806768
ADCK2	-0.222233	-0.0332518	-0.0682878	0.294073	-0.375849	0	0.29426	0.295682	-0.147728	-0.520033	0.58024	0.131515	-0.445537	0.249087	0.94018	-0.165473	0.443292
ADCK3	-0.51638	-0.100342	0.295289	0.23718	-0.0374918	-0.286361	-0.744536	-0.284967	-0.887742	-0.985118	-0.498192	0.808512	0.418305	0.153199	0.745194	0.471589	0.197772
ADCK4	-0.591231	-0.945064	-0.794922	-1.16624	-0.0102992	0.579111	1.09583	0.271946	0.12187	-0.533956	1.07081	0.571107	-0.213799	0.540599	0	0.586471	-0.30743
ADCK5	0	-0.159081	-0.331692	-0.400864	-0.367522	0.302773	0.371855	0.479459	0.449409	0.593404	0.321231	0.174806	-0.935369	-0.233733	-0.145947	-0.371124	0.209053
ADCY1	-0.361078	0	0.0941048	-0.715468	-0.099267	0.236097	-0.605441	0.365453	-0.876646	-0.0838928	-0.0906949	0.47289	1.11545	-0.399449	0.10848	0.502083	0.169549
ADCY10	2.24209	-0.947371	-0.786302	-0.466588	-0.0492983	1.10703	0.544762	0.341898	0.258999	0.486926	0.357275	-0.459351	-0.00499916	-0.366812	0	2.37142	-0.11022
ADCY2	-0.540001	-0.201386	-0.524896	-0.411827	-0.409792	0.328673	0.621251	0.398768	0.338594	0.635837	0.433851	-0.0633903	-0.511636	0.0245605	0.366008	0.195325	-0.393121
ADCY3	0.224803	0	-0.0489349	-0.419158	-0.674653	0.32375	-0.00958824	0.0568876	0.356837	-0.18822	1.31166	-0.89204	0.485454	0.506355	-0.416219	0.833221	-0.294917
ADCY4	-0.31235	-0.286672	-0.384167	-0.598309	-0.0830941	0.431837	0.0885065	0.423264	0.252112	-0.0717154	0.425552	-0.240403	0.107541	0.559928	-0.104287	0.514141	0.18275
ADCY5	-0.817697	-0.69685	-0.544679	-0.44171	0.420504	-0.165672	0.530185	0	0.154383	0.0794172	0.613586	0.344966	-0.248881	-0.74322	0.884041	-0.6828	0.450455
ADCY6	-0.40206	-0.442307	-0.306616	-0.0863476	-0.117723	0.102947	0.686409	0.463923	-0.12074	0	0.776772	0.522128	0.958592	-0.257568	-0.312059	0.28969	0.687978
ADCY7	2.84195	2.58921	1.97421	1.77508	0.999574	1.51701	-0.610187	0.585607	0.622363	0	-0.618131	-0.266946	-0.644251	-0.103243	-1.05608	-0.00495386	-0.920917
ADCY8	0.40074	-0.509979	-0.403039	-0.0286198	-0.0556531	1.67013	0.997342	0.830245	0.696859	0.690681	0.792255	-0.0604734	-0.0654969	0	0.368402	-0.0202708	-0.271803
ADCY9	-0.184505	-0.02314	-0.086298	-0.410352	0.489444	-0.36463	0.161888	-0.915621	-0.254745	0.268342	0	0.161233	0.891285	-0.302829	0.720323	0.595896	1.12147
ADCYAP1	0.872815	0.748385	1.33051	1.14947	0.717442	1.16265	0	-0.204999	-0.31068	-0.30881	2.41119	-1.16135	-0.696071	-0.255152	-0.694465	0.503379	-0.795835
ADCYAP1R1	-0.0673776	0.195975	0.627545	0.176164	0.1629	-0.728909	-1.63014	-0.668282	0.399267	-1.6062	-0.790262	0.673865	-0.319327	0.507476	-0.160193	0	0.258923
ADD1	-0.713505	-0.332965	-0.0281687	-0.180953	0.100981	0.25756	0.653188	0.0205364	-0.0777807	0.499744	0.14733	-0.351983	-0.259514	-0.41804	0	0.388536	0.284962
ADD2	-0.187321	-0.520692	-0.0826527	-1.13394	0.310396	0.681167	0.574679	0.197859	0.371636	0.680487	0.586566	-0.514333	0.0785755	-0.0880353	0.105194	-0.180051	-0.5789
ADD3	-0.0738649	0.350065	-0.0743875	-0.0747595	0.388955	0.221395	0	0.167626	0.0966368	0.143012	-0.0372744	0.146471	-0.619424	-0.878054	-0.0634651	-0.744403	0.125445
ADH1A	0.961608	1.57298	0.665689	0.935279	-0.452325	0.797659	0	-0.396752	0.0134707	-0.202925	-3.2956	-0.254391	-1.27146	-1.91258	2.27872	0.931968	-0.355441
ADH1B	1.08291	1.60095	0.785914	1.1719	-0.675148	0.911795	-0.176938	-0.481791	0.313744	-0.0588036	-2.50657	0	-1.7763	-3.34262	2.45015	0.622485	-0.684989
ADH1C	0.487223	0.646769	0.0611315	0	-0.777907	0.354733	0.126697	-0.676811	0.0599222	-0.203805	-2.90705	-0.527129	-1.69705	-1.62324	1.85758	0.572505	-0.52803
ADH4	-0.187146	-1.21054	-0.858462	-0.370915	-0.694684	0.914082	0.273654	0.0521846	0	0.449341	1.76562	-0.775455	0.0803008	-0.650266	0.528261	0.498836	-0.996371
ADH5	0	0.014267	0.0456266	0.0377531	0.829329	-0.833419	0.0528708	-0.255589	-0.802238	0.0171518	-0.491208	0.172648	-0.471939	-0.254827	-0.662922	-1.05011	0.200842
ADH6	-0.342214	-0.690239	-0.580145	2.58171	-0.201909	0.308731	0.825088	0.622438	0.52659	0.517372	0.633104	0.482502	-0.404728	0.574106	0.179243	-0.213951	-0.501957
ADH7	-0.579226	-0.633491	-0.796129	1.25925	-0.384735	0.546613	0.59989	0.597171	0.64057	0.73389	0.977594	0.0276964	-0.445026	0.00864625	-0.045131	-0.348237	-0.69579
ADHFE1	-0.217754	-0.568078	-1.07319	-0.666648	-0.153988	-0.370132	0.48594	0.180105	0.365983	-0.0125198	0.332863	0.529596	-0.733817	-0.394576	-0.071743	0.362295	0.610826
ADI1	-0.958091	-0.262521	-0.805712	-0.559692	-0.0760117	0.162034	0.986339	0.00749826	-0.240135	0.446824	0.346828	0.181094	-0.374328	0.304626	0.407855	0.229761	0.693346
ADIG	-0.16865	-0.535087	-0.422668	-0.0402582	-0.00527477	0.607674	0.992821	0.764732	0.717931	0.964442	0.82664	-0.0761311	-0.202991	0.0234203	0.38094	-0.00842762	-0.300175
ADIPOQ	2.78272	3.10691	-0.0190458	-0.753889	-0.556862	1.3516	0.0862465	-0.126822	-0.160322	-0.11621	0	0.130487	0.0350075	-0.792003	6.22491	-0.397632	0.219267
ADIPOR1	-0.935795	-0.772541	-0.502508	-0.414809	-0.66672	0.153128	0.903554	0.048068	0.346568	0.486545	0.80913	0.0711219	-0.396497	-0.43036	0.212291	-0.111515	0.103975
ADIPOR2	-0.369322	-0.622442	-0.204351	-0.53401	-0.402791	0.0738802	0.309178	0.223413	0.203761	0.441466	0.386579	-0.0802298	0	0.137477	-0.301262	0.256516	-0.00708675
ADK	-0.646522	-1.14133	-0.844233	-0.76562	0.254562	-0.329277	0.352233	-0.149628	-0.194904	-0.358938	0.55658	0.584427	0.142719	0.0834761	0.194117	0.00984383	0
ADM	0.061676	0.536914	-0.294785	0.0359211	-0.248369	-0.269055	1.66512	0.216329	-0.54824	1.45373	-1.37484	0	-0.123996	-0.39698	2.56916	-1.44094	0.713456
ADM2	0.246918	0.0725617	-0.0282471	0.289367	0.288199	-0.844476	-0.520564	-0.774583	0.349018	-0.738866	-0.885507	0.884073	0.0484731	0.217748	0.171579	0.270927	-0.0253706
ADNP	-0.156317	-0.168449	-0.114424	-0.101767	0.0498514	0.396987	0.277548	0.0886488	0.0384359	0.273365	-0.299154	0.0491982	0.0752244	-0.255896	-0.0917191	0.10411	0.073379
ADNP2	-0.183449	-0.145214	-0.28607	0.124567	-0.247963	0.179442	0.150103	0.272732	0	0.309443	0.00797844	0.163416	0.252151	-1.13439	-0.217502	-0.993205	-0.263838
ADO	0.0777311	0.206127	0.293399	0.24234	0.285174	-0.566334	-0.101211	-0.652539	-0.304848	-0.405103	-0.565499	0.224029	-0.366644	-0.269873	0	0.308578	0.325748
ADORA1	-0.244761	-0.895859	-0.127681	0.0571651	-0.155799	0.310516	0.532437	0.818925	0.0423183	0	-0.0014286	0.916653	-0.495941	-0.831072	1.58257	-1.61579	0.542717
ADORA2A	0.0958204	-0.376352	0.196348	-0.570377	-0.305268	0.739439	-0.0219429	0.678513	0.388313	0.197064	-0.363848	-0.161433	-0.0419588	-0.0985415	-0.0446613	-0.395877	-0.217171
ADORA2B	0.0766578	-0.378402	0.0680342	-0.522558	0.963541	-0.332251	-1.77742	0	-0.158257	0.406245	1.58497	-0.503257	0.680565	0.155621	-0.0138254	0.920163	-0.581574
ADORA3	1.14799	0.457637	0.892688	1.47625	0.452493	2.28616	0.497384	1.1385	0.670722	-0.257707	-0.995161	-1.67302	-1.32461	0.151759	-1.11436	-1.62845	-0.551401
ADPGK	0.88542	0.798929	0.62452	0.30819	-0.0371022	0.861599	0.0138984	0.65482	0.386413	-0.444622	-0.355328	-0.539465	-0.233934	-0.155686	-0.70544	-0.0750229	-0.683087
ADPRH	0.365573	0.0614328	0.283865	0	0.00402927	-0.766308	-0.613071	-0.457792	-0.565875	-0.453616	-0.461677	-0.399042	0.344207	1.43614	-0.0669785	0.108191	0.453794
ADPRHL1	-0.16029	-0.646371	-0.638544	-0.516562	0.2203	-0.281674	0.956165	0.195332	0	0.529922	0.595023	0.344351	-0.546564	0.589808	-1.68505	0.215858	-0.773514
ADPRHL2	-0.272908	-0.472383	-0.260782	-0.193683	-0.141226	0.233701	0.220798	0.127227	-0.200374	0.0309935	0.800409	0.135834	0	0.446536	-0.156227	0.591661	-0.0770435
ADRA1A	-0.499031	-0.987718	0.106166	-0.0881362	0.33272	0.173871	0.124174	0.12654	0.174699	0.133734	-0.145224	0.885409	-0.150353	-0.456741	-1.24781	0.383489	0.207723
ADRA1B	0.0107508	0.0351877	0.225169	0	-0.0712299	0.420274	-0.548287	0.10536	0.213821	-0.13536	1.12317	-0.574588	-0.25378	-0.196903	-0.837595	1.12653	-0.142157
ADRA1D	-0.625183	-1.06395	-0.897776	-1.14735	-0.323722	0	0.916574	0.511657	-0.398658	1.56232	0.185789	0.536581	1.63309	-0.99979	1.83776	-0.565095	0.626633
ADRA2A	1.20798	1.54679	-0.435913	-1.89789	-0.418192	0.40912	-1.45474	-0.494938	-0.470563	0.215398	1.82479	-1.63267	0.429052	0	0.793863	0.711835	-0.786541
ADRA2B	0.145639	0	-0.335352	-1.16119	-1.23531	1.70454	1.20821	1.86638	2.0468	1.3911	-1.1424	0.875463	-2.26377	-0.364858	-1.01039	-0.936941	0.406919
ADRA2C	0	-0.949543	-0.180991	-0.824516	-0.524155	-0.240359	0.619512	0.206887	1.02783	0.961682	1.02295	-0.13891	1.23573	1.10689	-1.16529	0.281591	-0.197315
ADRB1	-0.224414	-0.147747	-0.424706	-0.920495	0.681809	-0.749746	-0.312664	-0.317579	-0.789716	0.281969	1.2097	0.490293	1.50054	0.813581	0.981574	0	0.946979
ADRB2	0.292405	0.577542	0.400052	-0.136254	0.451695	-0.199798	0	-0.0206156	-0.225849	-0.25671	-0.0755234	-0.21974	0.300084	0.452478	0.328103	0.111685	-0.0958576
ADRB3	-0.298647	-0.492278	-0.343054	-0.171006	0.109459	-0.674373	1.14875	-0.39356	0.322971	0.0849547	-1.05863	0.782339	-0.309278	0.182685	0.27763	0	0.753423
ADRBK1	0.576977	0.2654	0.216818	0	-0.136765	-0.3283	-0.389382	-0.248822	0.0755424	-0.132976	-0.231726	-0.441983	0.278121	0.117234	0.300114	0.225038	-0.0758114
ADRBK2	0.905047	-0.0739651	0.840944	0	0.39618	0.0242739	-0.281758	0.848904	-0.73555	0.251231	-1.7395	0.204186	-0.629328	-1.18736	0.770007	-0.752861	-0.760082
ADRM1	-0.879916	-1.20452	-0.853447	-1.05634	-0.730224	0.22715	1.1951	0.386907	0.527789	0.907766	1.49028	0	-0.290006	0.0763483	-0.502837	0.126672	-0.323106
ADSL	-0.555442	-0.11651	-0.090518	-0.124089	0.272227	0	0.362596	-0.00369263	-0.121267	-0.0489521	0.735155	0.0235786	-0.135933	0.602199	0.172044	0.257471	0.341351
ADSS	0.13518	0.0357976	0	-0.264114	-0.59654	0.53493	-0.125787	0.617811	0.0278378	0.0243802	0.54635	-1.25187	0.100697	-0.214975	-0.866828	-0.449476	-0.740618
ADSSL1	-0.722383	-0.770926	-0.3906	-0.31742	0.222669	-0.917409	0.928071	-0.0236654	0	0.609182	1.35237	0.728039	-0.0478134	0.202156	0.432898	-0.139622	0.916212
AEBP1	0.0517197	1.79363	1.06594	1.32012	-1.53923	2.04546	-0.681445	0	0.381002	1.37609	-0.215796	-1.35812	-0.0514345	-0.914099	0.563005	-0.00388336	-1.20415
AEBP2	0	-0.0964556	-0.122192	0.0310202	0.115067	-0.104271	-0.313163	-0.219778	-0.274404	0.246018	0.00649738	0.217564	0.771644	0.359466	-0.0499248	0.491172	-0.113171
AEN	0.375158	-0.146215	0.0680392	-0.157898	0.135906	-0.169105	-0.0976284	-0.400609	-1.4105	-0.335747	0.907494	-0.923787	0.886801	0.435611	-0.93602	1.15673	0.0222192
AES	-0.510277	-0.586534	-0.539116	-0.482852	-0.122355	-0.293373	0.141235	-0.149561	-0.385096	0.210743	0.511146	0.116538	0	0.189995	0.410413	0.0476885	0.20928
AFAP1	-0.365708	0	0.378677	-0.403173	-0.946747	0.812336	0.00768757	-0.0459399	0.123325	0.38893	0.679685	-0.819128	0.154276	-0.0389347	0.223416	-0.302351	-1.23632
AFAP1-AS1	-0.230376	-0.422588	-0.475933	0.0213251	-0.0951448	0.633455	0.955802	0.734772	0.644343	0.959291	0.788661	-0.11321	-0.168962	0	0.338991	-0.0528464	-0.354152
AFAP1L1	-0.699754	-0.392283	-0.504567	-0.242818	0.500692	-0.119179	0.617873	0	0.646094	0.280271	0.751103	0.353425	-0.0673523	-0.61142	0.244158	-0.436672	0.644069
AFAP1L2	-0.170363	0.227065	-0.102011	-0.610394	0.40785	0.239865	-0.736474	0.141242	-0.134889	0.43869	-0.0296392	0	-0.508974	0.512258	0.0926681	0.558609	-0.181897
AFF1	0.0105427	0.0634766	0.13886	0.12401	-0.460636	0.861927	0.636908	0.733955	0.955152	0.273732	-1.60014	0.229962	-0.419927	-0.617713	-0.203362	-0.646967	-0.223651
AFF2	-0.204592	-0.506662	0.249493	-0.0255521	-0.039976	0.517072	0.960969	0.745403	0.697728	1.03426	0.996344	-0.100815	-0.210718	0.00720485	0.353254	-0.0227965	-0.301027
AFF3	-1.05988	0.711008	0.627643	-0.263338	-0.376053	0.667747	-0.129382	0.700177	0.859215	0.0354824	-0.525744	-0.232909	-1.23281	-0.82949	1.39239	-0.976628	-0.275035
AFF4	-0.599011	-0.0634396	-0.0717115	-0.152611	-0.37159	0.0234387	0.282255	0.526513	-0.051415	0.160289	-0.260719	0.0338085	0.460401	0.531376	-0.329768	0.502725	-0.121779
AFG3L1P	-0.159991	0.234735	0.0875802	0.253116	-0.535235	0.994089	0.439355	-0.0412305	-0.131468	-0.614796	-0.671902	-0.615584	0.109214	0.0241427	0.00762048	0.438794	0.0832748
AFG3L2	-0.771556	-0.463763	-0.494238	-0.143551	0.660518	-0.351766	0.4396	0.0326633	0.0335493	-0.440975	0	0.868869	0.164951	-0.166567	-0.212649	0.245788	0.366055
AFM	-0.139009	-0.497311	-0.397183	-0.00120544	0	1.51474	1.39939	0.822055	0.88839	0.727236	0.922191	-0.0687118	-0.209153	0.00417757	1.32795	-0.0136566	-0.300319
AFMID	-0.265159	0.100808	-0.193346	-0.311021	0.152738	0.256991	0.710343	1.06637	0.17313	0.0295463	0.178609	-0.0801849	-0.0382775	-0.724624	0.518016	-1.45373	-0.0873758
AFP	-0.246127	-0.148655	-0.495401	-0.124788	-0.102523	0.397814	0.924199	0.697462	0.625446	0.719326	0.739126	-0.0702634	-0.194167	0.0146813	0.37079	0	-0.300244
AFTPH	0.347746	0.211926	0.181776	0.123235	-0.100215	0.0831208	-0.117343	0.0329542	0.279921	0.306687	-0.0186317	-0.0602159	0.286877	-0.248569	-0.31052	0.161664	-0.0037942
AGA	0.683254	0.232133	0.233483	0.100828	0.0842915	-0.0980082	-0.450909	-0.263439	0.31946	-0.307236	-0.049099	0	-0.191637	0.122463	-0.118117	0.116321	-0.0975313
AGAP1	-0.639481	0.0421865	-0.173302	-0.536726	0.0370131	0.254397	-0.0979571	0.0615692	0.0529172	0.263863	-0.244071	0.180038	0.264593	-0.36024	0.72474	-0.0527341	0.064604
AGAP11	-0.208487	0.25388	0.0803328	0.102178	-0.393507	-0.174104	-0.32362	0.218538	-0.0113668	0.129803	-1.55461	0.525941	0.0420818	0	0.295809	-0.414662	-0.474176
AGAP2	0.312259	0.214433	0.0727482	0.263784	0.238937	-1.0877	-0.380633	0.035099	0	-0.439443	-1.40449	-0.379755	-1.40488	0.540259	-0.506771	0.0460496	-0.178068
AGAP3	0.150125	0.0476575	0.160127	0.0267043	0.372549	-0.198505	-0.416949	-0.47585	-0.0817523	-0.0873108	0.400944	-0.275437	1.10533	0.328495	0.852558	0.712646	0.655231
AGAP7	0.250663	0.863736	0.215624	0.374314	-0.0908339	0.111857	-0.495948	0.217363	-0.387136	-0.775734	-1.89191	0.146422	0.182178	-0.165668	0.447557	-0.113041	0.0252907
AGBL1	-0.0626621	0.0593407	-0.114508	0.0438368	0.070864	-0.453085	-0.749058	-0.691655	-0.546957	-0.656392	-0.299821	-0.0257974	-0.176046	-0.0095346	0.243142	0.134589	0.0555522
AGBL2	1.97128	1.96281	0.920948	0.515554	0.68104	0.511479	0.181313	-0.0151801	-0.105419	-0.0806022	0	-0.964024	-1.07803	-0.669649	1.71804	-0.830848	-1.18917
AGBL3	-0.112901	-0.439163	-0.22319	0.0700188	0.191749	-0.395952	0.192369	-0.101901	-0.186764	0.0102687	0.102595	0.144047	0.170099	0.237594	0.309263	0.100082	0.00582529
AGBL4	-0.208855	-0.142795	-0.115629	-0.145594	0.574031	0.0676004	0.490747	-0.135393	0.041944	-0.139269	-0.108809	0.0154068	0.10733	-0.0554442	0.678606	-0.195666	0.150917
AGBL5	-0.395806	0	-0.27174	0.129472	0.17041	-0.0440912	0.700845	0.00997305	-0.122391	0.0589876	0.691427	-0.0608344	-1.35045	0.228167	-0.0856171	-0.431953	0.265232
AGER	0.268812	-0.190321	-0.0404018	-0.476203	-0.175912	0.595045	1.12474	0.89294	1.23189	0.388623	-0.158069	-0.420845	-0.201607	0.11471	-0.560814	-0.70605	-1.16921
AGFG1	-0.0536714	-0.0584989	-0.0981808	0.116352	-0.0189693	-0.0760226	0.0358293	-0.0678077	-0.0404284	0.0341299	0.0896518	0.404349	0.389766	0.284006	-0.10159	0.676864	0.0347347
AGFG2	0.0418377	-0.310448	0.0588574	-0.546369	-0.338493	-0.00851798	0.222498	0.59118	0.0509455	0.286034	0.365777	0.192322	-0.351402	-0.855236	-0.14965	0.281616	-0.0535247
AGGF1	0.0656872	0.175019	0.168187	0.209463	0.238832	-0.472705	-0.136819	-0.570232	-0.524458	0.0194969	-0.103475	-0.0322342	0	0.0365591	-0.231453	-0.0527687	0.0247669
AGK	-0.187095	-0.370191	-0.494569	-0.166086	0	-0.125021	0.672557	0.42433	0.665069	0.15199	0.904108	0.97573	-0.484841	-0.0482984	0.318063	-0.512482	0.355137
AGL	-0.33934	-0.442472	-0.483598	-0.105449	0.257423	-0.427246	-0.0766439	-0.0510693	-0.242069	0.129865	0.337361	0.49319	0	0.0946732	0.274449	0.234631	0.604724
AGMAT	2.14816	1.42576	0.67764	1.42397	-0.239509	0	-0.177238	0.205647	0.618277	-0.582555	-0.473033	-0.116556	0.318674	-0.801244	0.10771	-0.0403976	-0.481634
AGMO	-0.233532	0.979892	0.97609	0.114728	-0.664406	0.174899	0	-0.0481992	0.63829	0.92951	-0.643197	-0.402359	-0.892052	-0.413826	0.890598	-0.485889	1.38575
AGPAT1	-0.0845556	-0.44603	-0.187776	-0.033843	-0.187184	0.213816	0.756055	0.251491	0.259887	0.656757	0.383181	0	-0.465202	-0.474826	0.636172	-0.126931	0.445756
AGPAT2	-0.82174	-0.788323	-0.666484	-0.63001	0.0371904	-0.507453	0.189916	-0.320453	-0.293514	0.221889	1.13995	0.218394	0	-0.122761	1.18986	0.0701885	0.107399
AGPAT3	0.769997	0.148608	0.229437	-0.108958	-0.387526	-1.19819	-0.168096	-0.192832	0.126864	0	0.780411	-0.398	0.501492	0.788881	-0.146037	0.476572	-0.798586
AGPAT4	-0.182582	0.766355	0.852873	-0.113101	-0.454932	0.51438	-0.478755	0.308799	0.0130254	0.0635335	-0.275167	-0.228307	0.487826	0.0614624	0.187364	0.633174	-0.273915
AGPAT4-IT1	0.101725	0.905111	0.52546	-0.330599	-0.5051	1.83305	0.253057	1.25369	0.968363	-0.00832748	-1.21467	-0.9891	-0.362868	0	-0.102938	0.341298	-0.743256
AGPAT5	0.703166	0.203608	0.400827	0.527481	0.0194316	0	-0.742581	-0.187682	-0.0802531	-0.279997	-0.225729	-0.208914	1.52161	0.0928526	-1.14867	0.291497	-0.58083
AGPAT6	-0.291305	-0.594976	-0.123316	-0.283987	-0.518992	0.229419	0.191518	-0.229854	-0.196367	-0.412339	0	0.0262671	0.233611	0.193726	0.229689	0.487004	0.0906687
AGPAT9	-0.680362	-0.627554	-0.913708	-0.459476	0.184025	-0.900382	0.324005	-0.0193262	0.166389	0.0997324	0	0.54527	0.562791	-0.207286	-0.37318	1.44537	0.348685
AGPHD1	-0.199812	-0.347325	-0.111325	0.0346737	0.0779552	-0.119904	0.859053	-0.299587	-0.0731733	0.278764	0.860566	0.631893	-1.31679	0.13267	0.253505	0.152208	0.0927186
AGPS	0.094982	0.0338556	-0.115914	-0.0632641	-0.15145	0.116901	0.0574361	0.0530999	0.277053	0.415831	0.00091537	0.139322	-0.397483	0.0515668	-0.524367	0.0509181	0.0548444
AGR2	-0.324126	-0.792804	-0.414158	2.8568	-0.0888166	-0.0642009	0.81105	0.112782	0.00911617	0.352575	0.680194	-0.283421	0.301172	0.222231	0	-0.538328	-0.977022
AGR3	0.776722	-0.806037	0.563335	-0.313192	-0.32248	0.230018	0.699282	0.519194	0.413285	0.480492	0.514106	-0.432139	-0.566803	-0.360866	0	-0.381482	-0.677259
AGRN	-0.172869	-0.194495	0.633019	-0.417278	0	0.909945	0.166379	0.90976	0.787029	0.824115	1.00637	0.193742	-0.195812	-0.394608	-0.564144	-0.213884	-0.05165
AGRP	0.368475	0.152088	1.42357	0.453607	0	-1.2864	-1.19011	-1.45161	-1.15319	-1.3315	1.17296	0.42181	-0.894882	0.0836563	0.660335	-0.0640798	-0.235618
AGSK1	-1.03132	0.175976	-0.452972	-0.504244	0.0683613	0.133782	0.519127	0.0393453	0.497359	-0.0649465	0.102123	-0.136074	0.209849	-0.286095	0.170857	-0.182707	-0.0103645
AGT	-0.634321	-0.473425	0.0624094	-0.133114	-0.49243	-0.0938749	0.209966	-0.0554142	0.158624	0.0777636	0.382346	-0.199108	-0.409631	0.911618	0.311806	0.468431	0
AGTPBP1	-0.102965	-0.0443058	-0.275612	-0.192896	0.0951793	-0.171514	-0.369031	-0.471963	0.114041	-0.346433	-0.260385	0.346864	0.136601	0.0834014	0.380256	0.565035	0.131622
AGTR1	0	0.0874653	1.16706	-2.02214	-0.897897	1.12175	0.652689	0.946152	-0.586266	0.150638	-2.23862	-0.53942	-0.999357	-1.75315	2.23716	-0.12466	0.00655079
AGTR2	0.410424	0.270159	-0.1979	-0.67842	0.064249	0.0820451	0.328758	2.84249	0.214399	0.605016	0.524894	0.0415444	0.0949328	-0.632468	-0.283457	-0.671223	-0.350234
AGTRAP	0.234539	-0.0316434	0.157453	-0.245453	-0.439524	1.05912	1.08869	0.639235	0.419522	0.140518	1.39325	-0.0690889	-0.902218	-0.708448	0	-1.49987	-0.27958
AGXT	-0.0236435	-0.0127401	0	-0.0690575	0.491052	-1.00888	0.0723505	-1.38588	-0.432969	-0.582682	-0.798138	0.371696	0.235667	0.0575552	1.03637	0.35175	0.419845
AGXT2	-0.169273	-0.513254	-0.40084	-0.0247183	0	0.509425	1.01007	0.799764	0.715401	0.723552	0.833838	-0.0852699	-0.206738	0.00714397	0.764022	-0.0241923	-0.281986
AGXT2L1	-0.797923	-0.961162	-1.98878	-2.42141	0.139624	-2.05121	0	-1.07184	-1.58139	-1.02907	3.30184	1.16242	3.5079	3.23116	1.66632	1.75915	1.27134
AGXT2L2	-0.113714	0.284971	-0.290346	-0.202476	-0.28515	-1.04238	0.292541	0.650196	0.229314	-0.167779	-0.550817	-0.312288	-0.213774	0.0468826	0.146494	-0.128126	0.14015
AHCTF1	-0.117747	0.19421	0.0903719	0.0140948	-0.23661	0.00615859	0.132655	0.169608	0.281837	0.339398	-0.641925	0.397133	0.0799117	0.232841	-0.452706	-0.0235953	-0.0660946
AHCY	-0.728578	-0.632817	-0.641152	-0.0890245	-0.2069	0.300755	1.13107	0.251546	0	-0.44173	1.13872	-0.10552	-0.205227	0.749337	0.442801	0.799903	0.602695
AHCYL1	-0.435453	-0.494522	-0.393615	-0.197464	-0.252263	-0.104073	0.139163	-0.100677	-0.0234323	0.426004	0.510998	-0.041945	0.790159	-0.0452333	0.0363016	0.566437	0.22005
AHCYL2	0.683515	0.491825	0.38097	0.391657	0.22842	-0.0896721	-0.0463004	-0.0522351	-0.0252633	-0.52727	0	-0.230119	-0.526366	0.565713	-0.0458512	0.703545	0.0455618
AHDC1	-0.629171	-0.799439	-0.592733	-0.576169	-0.221291	-0.404449	-0.134288	0.0290172	-0.0560186	0.0671871	0.608217	0.152982	0.00653482	0.200261	0.155847	0.354038	0.00524926
AHI1	0.350217	0.38968	-0.661778	0.186446	-0.567428	0.0303672	-0.0680801	0.137811	-0.0783836	0.0649462	-0.402358	0.159246	0.839668	0.661905	-0.292905	0.359852	0.0851188
AHNAK	-0.0594501	0.224773	0.250773	-0.382947	0.346059	0.231909	0.108674	-0.30557	-0.0304562	0.377744	0.0335388	0.0107104	-0.166503	0.408924	-0.515519	-0.0168826	-0.363096
AHNAK2	0.36962	0.204364	1.79026	-0.877844	-0.493565	2.00128	1.14207	0.279502	0.211214	0.501433	2.71934	-0.205209	0.321129	-0.658465	-0.541348	-1.89077	-1.15456
AHR	0.223859	0.164178	0.0117245	0.144409	0.0746675	-0.12938	-0.262859	-0.225902	-0.101291	0.219631	-0.308109	0.383502	0.134717	-0.224675	-0.782704	0.737934	-0.281638
AHRR	-0.588526	-0.392744	0.563374	-0.0515938	0.78985	0.126581	0.571183	0.392024	0.264687	0.36725	0.398292	-0.443845	-0.187565	-0.408856	-0.0621977	-0.440114	0
AHSA1	-0.524796	-0.397036	-0.222504	-0.134231	0	-0.14638	0.519816	0.242712	-0.3936	0.162153	0.652015	0.0708284	0.42311	-0.197784	0.641309	-0.0649891	0.865664
AHSA2	0.464394	0.252911	0.362292	0.28755	0.0620473	-0.144485	-0.608474	0.079563	0.183146	-0.521559	-1.64292	0.0119904	-0.0261601	-0.291168	-0.352178	-0.347075	-0.290046
AHSG	-0.29387	-0.265252	0.086658	-0.40356	-0.154036	-0.331741	0	-0.225636	-0.267705	0.0413442	0.772656	0.23855	0.255685	-0.13953	1.12782	0.259619	0.00101376
AHSP	0.749691	-1.3242	-0.559908	-0.587354	-0.48612	2.39937	0.190335	0.511254	0.456978	2.37743	0.237237	0.243494	0	-0.770524	-0.421609	-0.232435	-0.0474291
AICDA	-0.376826	-0.420356	0	-0.252572	-0.225969	3.37585	1.2939	0.693613	0.657645	1.10724	0.60178	-0.0597935	-0.327497	0.135653	0.226672	-0.136441	-0.439851
AIDA	-0.139258	-0.461786	0.0058937	-0.212207	0.060626	-0.212887	-0.418744	0.0913461	-0.643054	-0.372674	0.31798	0.251322	0.150561	0.191824	0.30082	0.440001	0.385829
AIF1	1.03888	-0.00308038	0.673591	0.455852	0.157181	-0.42116	-1.12704	-0.775064	-0.65367	-1.93643	-0.0951421	-0.611162	-0.634053	0.0651965	-1.11513	-0.398289	-0.840904
AIF1L	0.0211251	-0.0117604	0.390122	-0.374948	0.101647	-0.411593	-0.152439	-0.283072	-0.590763	-0.054152	0.131579	0.555876	-0.428441	0.64828	-0.18137	0.525334	-0.214145
AIFM1	-0.251272	-0.511956	-0.47326	-0.16806	0.321214	-0.936076	0.0578203	-0.524631	-0.345485	-0.211545	0.312476	0	0.355679	0.0116787	0.206747	0.388154	0.458293
AIFM2	-0.413578	-0.612194	-0.476427	-0.182349	0.186249	-0.0973785	0.365911	0.0517755	0.237667	0.243042	0.0272055	-0.0144112	-0.0352287	-0.17019	-0.294943	0.756275	0.0106876
AIFM3	1.93546	0.143771	-0.178848	1.02065	-0.199687	1.60321	1.51885	1.51337	0.971614	-0.258364	-0.110413	-0.385289	0	-1.3769	2.47907	-1.41708	-0.162584
AIG1	-0.544059	-0.625654	-0.559105	-0.292523	0.329751	-0.292889	0.306203	0.382941	-0.115636	0.331477	0.492049	0.352835	0.0959473	0.0461197	0.336129	0.139391	0.461208
AIM1	2.21717	1.80691	0.925543	0.801794	0	1.43666	-0.141023	1.54607	0.607336	0.145792	-1.45565	-1.77168	-1.84441	-1.02818	-2.12461	-1.26849	-1.63498
AIM1L	-0.143488	0.131397	-0.0335887	-0.156803	-0.0195467	0.149766	-0.192007	-0.0815806	0.305189	-0.190665	0.0542865	-0.440753	-0.531256	-0.0151493	-0.343776	-0.208522	-0.914867
AIM2	4.98114	4.07362	2.98768	3.55883	-0.0168052	2.108	1.58697	2.70172	3.79245	0	-2.7748	-2.75082	-1.99908	-2.66901	-3.32697	-2.61838	-1.45436
AIMP1	-0.153059	-0.22294	0.0493021	-0.0175266	0.0119581	-0.369671	0.199278	-0.27944	-0.274278	0	0.641563	0.111065	0.566077	0.221189	-0.190281	0.555051	-0.0402689
AIMP2	-0.624797	-0.300041	-0.326603	-0.0723438	0.652681	-0.530015	0.37136	-0.108707	0.0259504	0	1.02498	0.319432	0.264043	0.960007	-0.186938	0.777654	-0.103191
AIP	-0.2776	-0.573761	-0.414745	-0.636875	-0.348863	0.297644	0.315357	0.173076	0.000846	0.0974512	0.631487	0.103294	-0.286277	-0.845251	0.126195	-0.501107	0
AIPL1	-0.2368	-0.590806	0	-0.0980563	-0.114334	0.419109	0.930141	0.720825	0.636557	0.619594	0.7312	2.29742	-0.286736	-0.0782719	0.303464	-0.0966253	-0.390604
AIRE	-0.127974	0.0901384	0	0.0730224	0.140033	-0.902326	-0.664342	-1.07046	-1.43413	-0.965572	0.421394	0.800343	0.162225	0.915159	-0.068665	0.480845	-0.0458426
AJAP1	-0.576201	0.244361	-0.308422	1.05696	-0.477458	-0.0214655	0.714142	0.430466	0.320264	0.29623	0.249881	1.03231	-0.485017	-0.584267	-0.173401	-0.554594	-0.541575
AJUBA	-0.523604	0.600887	-0.889696	-0.736316	0.750416	-0.679965	0	-0.352835	-0.864227	0.494491	-1.23941	-0.0224333	0.550687	0.694587	0.496967	0.768959	0.88522
AK1	-1.05659	-0.940443	-0.868581	-0.582843	-0.244881	-0.286289	0.606765	-0.0266113	0.12598	0.618954	1.31157	0.209499	-0.260938	-0.037231	0.777766	0.229494	0.708682
AK2	-0.0709771	-0.302646	-0.278053	-0.296007	-0.0255322	-0.451348	0.123756	-0.165991	0.177192	-0.0575008	0.654275	-0.0084784	0.158777	0.57438	0.000875712	0.511873	-0.0693246
AK3	-0.690742	-0.57092	-0.576266	0.302713	0.130428	-0.664073	0.290887	0.0701933	-0.239789	-0.0691557	0.553677	-0.532505	-0.0797281	0.346283	-0.143512	0.592815	0.352486
AK4	-0.270377	-0.266113	-0.434455	0.197022	0.258334	-0.0604095	0.565645	0.401018	0.298309	0.522562	0.0670686	0.493372	-0.311824	-0.215349	-0.663173	-0.456596	0.43826
AK5	-0.378663	-0.307713	0.10497	0.0205496	-0.422569	0.500243	0.610629	0.861779	0.496288	0.242931	0.483965	-0.251459	-0.377765	0.203696	0.152583	-0.489097	-0.764207
AK7	-0.137427	-0.262101	-0.385428	-0.0534272	-0.0378199	0.705494	1.00938	0.8116	0.663041	0.884387	0.773714	0.0583725	-0.223398	0	0.400196	-0.0243745	-0.296913
AK8	-0.0921388	-0.518204	-0.0997257	-0.34754	0.504948	-0.423534	0.646564	-0.487834	0.952228	0.503861	0.4045	1.27627	-0.357964	0.468879	0.409841	0	-0.00700569
AKAP1	-0.860173	-0.387141	-0.530989	0.000527865	0.31833	-0.119894	0.915973	0.0324168	-0.252923	-0.133528	1.02183	0.17229	-0.0346611	-0.809297	0.515156	-0.486753	0.399927
AKAP10	0.30794	0.475526	0	-0.404598	-0.194653	1.18714	0.664782	1.32842	0.711607	0.719435	-0.0411448	0.166943	-0.433197	-1.49779	-0.88652	-0.776079	-0.459326
AKAP11	-0.0607646	0.249305	0.136916	0.271467	-0.00841689	-0.0329339	0.143171	-0.181957	0.00366616	0.461639	-0.509324	0.124739	-0.097152	-0.830314	0.20371	-0.484798	-0.0239666
AKAP12	-0.181599	0.308832	0.409465	-0.0595961	-0.203354	0.00870847	-0.0441842	0.056932	-0.377078	-0.113409	0.42371	-0.822813	1.00622	0.861729	-0.583527	-0.581144	-1.30637
AKAP13	-0.335796	-0.122769	0.0673389	0	0.137589	-0.290971	-0.362483	-0.068881	-0.183618	0.0528231	0.644809	-0.399646	1.11249	0.878331	-0.891134	0.223701	0.290148
AKAP14	-0.478255	-0.199928	-0.733385	-0.345499	-0.328895	0.280299	1.38101	0.461783	0.40279	0.648363	0.500643	-0.387618	0.774352	-0.295433	0.0591714	0.570053	0.246704
AKAP17A	0.284316	0.320546	0.0458193	-0.0931768	0.0381699	-0.00812626	-0.15477	-0.0692358	0.141627	-0.666968	-0.605723	-0.582995	0.187655	0.140665	-0.347181	0.519783	0
AKAP2	-0.608551	-0.431664	-0.161913	0	-0.262862	0.766022	1.56012	0.850414	0.841114	0.727135	1.18376	0.251147	-0.283099	-0.432212	-0.646437	-0.0875487	0.461774
AKAP3	-0.337062	-0.333449	0.215854	-1.07498	0.757737	-0.441924	0.748085	-0.271888	-0.303486	-0.0547991	0.190715	0.201442	0.161579	-0.72979	3.88549	0	0.0478311
AKAP4	0.059088	-0.490331	-0.479851	-0.214052	0.0408864	0.144761	0.346281	0.161335	0.236912	-0.0897386	0.618718	0.801158	-0.00295233	0	0.443947	0.341056	0.38978
AKAP5	0.186382	0.267814	-0.215396	-0.0951507	-0.499777	0.304215	0.623382	1.21225	1.20536	0.559809	0.370275	-0.0962582	-0.0789554	-0.491996	-0.148832	-0.214971	-0.129899
AKAP6	-0.789234	-0.710089	-0.256932	-0.747866	0	-0.257358	0.613446	0.280675	-0.0451136	0.981243	-0.35403	0.824479	0.0026269	0.550139	-0.700183	0.432215	0.461259
AKAP7	-0.0890274	-0.188538	-0.339105	0.0208921	-0.466073	0	0.875896	0.194504	0.386484	-0.0084877	0.870322	0.301913	-0.700865	-0.122788	-0.04422	0.388962	0.244602
AKAP8	0.0887156	0	0.0637398	0.0701361	0.20505	-0.707418	-0.61988	-0.578139	-0.685314	-0.678373	-0.435921	-0.576811	0.62106	0.778479	-0.308206	0.789372	0.34393
AKAP8L	-0.764437	-0.840488	-0.705043	-0.981196	-0.60561	0.0766525	0.548243	0.165008	0	0.329348	0.690947	0.236244	0.343471	-0.96586	-0.12264	-0.190721	0.298405
AKAP9	0.0541489	0.173553	0.190312	0.11588	-0.447908	-0.169607	-0.494412	-0.0356166	-0.183687	0.0369867	-1.19534	0.228372	0.115053	-1.09919	-0.178247	-0.591439	0.567688
AKD1	-0.269326	0.0434718	-0.105101	-0.633624	0.263242	0.690094	-0.10006	0.21862	0.293181	-0.0126514	0.299586	0.39172	0.0327295	0.0366456	0.263344	0.15904	-0.0269605
AKIP1	-0.107861	-0.312085	-0.0813389	-0.241391	0.215289	0.33362	0.625248	-0.0680113	0.0436096	0.200033	0.592007	0.257615	-0.184516	-0.016593	0	-0.272878	0.498784
AKIRIN1	-0.530085	-0.476023	-0.561282	-0.26499	-0.290841	-0.245147	0.0836665	-0.119346	-0.107464	0.321237	0.575175	-0.0338224	0.820862	0.221382	-0.0448602	0.698238	0.453938
AKIRIN2	-0.123747	-0.176419	-0.064702	0	0.118863	0.204632	0.595813	0.189593	0.792114	1.03739	0.239289	-0.159197	-0.0722733	-0.613177	-0.228237	0.134587	-0.182704
AKIRIN2-AS1	0.612682	0.962317	0.370293	0.612536	-0.145045	0	-0.528649	0.570284	0.345755	-0.511147	-1.78772	0.262611	0.0994625	-0.330212	-0.960682	-0.100871	-1.23337
AKNA	0.719066	1.10002	0.815122	0.62919	-0.890867	1.21485	0.955393	1.3242	1.42935	0.310732	-0.418366	-1.0373	-0.253559	-0.858817	-0.483075	-0.875601	-1.14196
AKNAD1	-0.774575	-0.0368776	1.01726	-0.232032	0.256646	0.549258	0.599028	0.452313	-0.294368	0.669258	0.270859	0.231299	-0.262682	-0.305395	0.987567	0.360308	-0.239571
AKR1A1	0.0809984	-0.139912	-0.0696011	-0.412241	-0.0560703	0.53777	0.344686	0.383799	-0.13726	-0.352962	0.613441	-0.123122	-0.425026	0.0423985	1.05648	0	0.125393
AKR1B1	-1.3066	-1.19787	-0.932735	-0.873376	-0.345347	0.0344	0.0155306	-0.339971	-0.365807	0.0169611	1.22068	0.31955	-0.482662	0.128399	1.4544	0	0.461436
AKR1B10	-1.13395	1.42663	1.93751	-0.464276	-0.909386	2.10591	0.0353439	0.611096	-0.246285	-0.0812161	0.385836	-0.0953155	-0.0866656	-0.120651	4.47445	-0.371853	-0.432431
AKR1B15	-0.900989	-0.876843	0.42897	-0.777087	-0.787368	2.70439	1.52812	0.0648141	0	0.257804	0.601572	-0.221861	-0.798984	0.274522	3.76835	-0.584702	-0.924767
AKR1C1	-0.954636	0.433486	0.399598	-0.444146	-0.371706	-0.068916	-0.976469	-0.90685	0.372419	-0.172295	0.128444	-0.291335	0.992171	-0.921468	1.10719	2.17827	0.309204
AKR1C3	-0.494435	0.0456333	0	-0.530313	-0.200395	0.178415	-2.34117	-0.987466	-0.453664	0.957405	0.783951	-0.892583	0.569663	-0.00101662	0.0699158	2.17022	0.512891
AKR1C4	-0.248259	0.121482	-0.0242977	-0.123245	0.873139	-1.7014	-1.3218	-1.08188	-1.57391	-1.20331	-0.785761	-0.363334	0.630016	-0.0726106	0.70005	1.09833	0.253038
AKR1CL1	-0.298047	-0.652289	-0.558052	-0.169356	-0.206301	0.329113	0.855482	1.73152	0.982182	0.657527	0.644436	0	-0.343579	0.849275	0.260375	-0.15041	-0.454469
AKR1D1	-0.154252	-0.507977	-0.389359	-0.0150535	0	0.589081	0.993327	0.773397	0.712211	0.944268	0.824182	-0.0846758	-0.203668	0.0202045	0.367247	-0.0167916	-0.305707
AKR1E2	-1.05309	-0.347032	0.33194	-0.119277	-0.207509	-0.509926	0.387311	0.428393	-0.971929	0.608132	0	0.460296	0.0773687	-0.0860352	0.168323	-0.00235415	0.549974
AKR7A2	-0.345455	-0.417459	-0.189704	-0.787997	0.335187	-0.227065	0.297874	-0.195282	-0.733545	0.193179	0.532363	0.503796	-0.84472	0.0659475	0	0.0679188	0.0441713
AKR7A2P1	-0.465601	-0.249159	-0.133209	-0.556564	0.297063	-0.0359182	0.363027	-0.0836792	-0.534838	0.148576	0.240906	0.411164	-0.747876	0.0440702	0.00688791	0	0.403293
AKR7A3	-0.304247	-0.425845	-0.0811348	-0.407919	0.225079	0.270926	0.820767	0.365944	-0.0534477	0.512095	0.790411	0.321824	-0.912372	-0.00220108	-0.0519018	0	0.0929708
AKR7L	0.0351889	0.111391	0.0224862	0.5915	-0.157493	0.436238	0.390893	0.0311048	0.515776	0.00368785	-0.50392	-0.367449	-0.936884	0.305609	-0.0556493	-0.130525	-0.110281
AKT1	-0.509887	-0.619536	-0.316565	-0.265324	-0.0788536	-0.398265	0.289134	0	0.0406628	0.428667	0.879007	0.498179	-0.07547	0.264852	-0.0772209	0.426998	0.394419
AKT1S1	0.539706	-0.693878	0.249697	-0.0675564	-0.236262	0.539346	0.462456	0.49979	1.00527	0.033669	0.444581	-0.0248475	-0.188225	-0.545176	-0.379966	-0.54633	-0.637709
AKT2	-0.590999	-0.389138	-0.42759	-0.591042	-0.33562	0.45372	0.667938	0.37428	0.408676	-0.0221745	0.528758	-0.0529547	-0.392713	-0.350111	0.234622	-0.188282	-0.122872
AKT3	0.0804105	0.409971	0.366936	-0.0198436	-0.121099	0.276065	-0.30202	-0.0986381	0.105231	0.387946	-0.169787	-0.235869	0.477059	-0.387655	0.644635	-0.204449	-0.345801
AKTIP	-0.729167	-0.664436	-0.252918	-0.714912	-0.142738	-0.0291014	0.185741	-0.0124087	-0.629205	0.101555	0.25488	0.354365	0.140086	0.657884	0.179633	0.116691	0.215648
ALAD	-0.0813847	0.0509653	-0.364387	-0.476415	-0.467525	0.382479	0.767785	0	-0.434845	0.783734	0.32677	-1.02288	0.169144	-0.279915	-0.751837	0.260162	0.563897
ALAS1	-0.803206	-0.868422	-0.455216	-0.237652	0.0694199	-0.442691	0.536073	0.0504875	0	-0.122199	0.850688	-0.164309	0.0566845	0.15919	-0.48209	0.712671	0.144765
ALAS2	0.622051	-1.22165	-0.945922	1.13925	-0.811661	1.96754	-2.58499	0.545334	0.688213	2.73273	-1.90599	-0.941837	0.764514	-0.749162	-1.4095	0	0.881216
ALB	-0.385812	-0.112103	-0.00649738	0.23262	2.99301	0.536504	4.7472	0.404174	2.10964	0.557568	1.00772	-0.112043	-0.105487	-0.0391736	0	-0.362483	-0.643342
ALCAM	1.34619	1.02458	1.22164	1.38069	-0.064764	0.452504	0	0.603515	-0.225293	0.10886	-1.1812	-0.922963	1.2907	-1.00702	-0.382519	-0.328557	-1.16308
ALDH16A1	0.226014	-0.0453167	-0.348031	0	-0.178538	0.357528	-0.0310626	0.0552087	0.694826	-0.0382452	0.515432	-0.204666	-0.830579	0.335861	-0.160355	0.59743	0.277489
ALDH18A1	-0.0616903	0.0110588	-0.385244	0.229624	-0.399197	0.760741	0.571981	0.444518	0.475326	0.622142	1.31761	-0.00403786	-0.00577831	0	-0.598656	-0.379364	-0.653932
ALDH1A1	1.25625	0.610209	0.220093	0.534976	-0.428977	0.641381	-1.05623	0.500051	-0.0594153	-0.330299	-1.06062	0.381768	-0.429248	-0.57712	0.73605	-0.197704	-0.396617
ALDH1A2	-0.571099	0.73726	0.0221214	0.643062	0.436957	0.1842	-1.6012	0	0.86293	-1.29849	-0.315333	1.22611	-0.713627	-0.572857	0.335189	-0.221567	-0.412904
ALDH1A3	0.306237	-0.0402846	0.597022	0.917194	-1.02326	0.18987	-1.76587	-0.0570602	0	-0.700006	0.766979	-1.93957	0.781101	1.24258	-0.387043	0.326643	-2.21414
ALDH1B1	-0.123015	-0.422749	-0.253408	0.121601	0.204538	-0.943345	0.472593	0.367108	-0.0445924	-0.223682	0.986836	0.481079	0.264383	0	0.746432	-0.266051	-0.0600133
ALDH1L1	-1.03521	-1.36423	-1.00558	-1.45972	-1.19724	0.029706	1.39912	0	0.270429	0.487158	0.307876	0.261675	-0.91059	-1.58284	0.278182	-0.439179	0.426335
ALDH1L2	0.17368	0.739283	0.49091	0.450028	0	0.329057	-0.148726	0.0770874	0.553281	-0.250082	-0.172842	0.215854	-0.6954	-0.0702224	-0.348378	-0.888225	-0.336933
ALDH2	-0.263001	-0.692211	-0.351297	-0.540581	0.24767	-0.605892	0.37079	-0.444121	-0.0620556	0	0.191961	0.502678	0.226098	-0.0829039	0.0381422	0.8482	0.0888882
ALDH3A1	0.806045	0.0632236	0.453063	0.138819	0.747637	-0.723948	-1.27794	-1.10931	-1.32511	-0.26469	-1.16968	-0.268598	0.340339	0	0.0865643	0.0408993	0.469588
ALDH3A2	-0.18418	-0.167477	-0.272139	0.107417	-0.200719	0.0161481	-0.0507197	-0.00814533	0.013103	0.209554	0.495706	-0.108297	0.0353661	-0.471085	-0.118572	-0.574317	0.557064
ALDH3B1	0.187318	-0.192719	0.332272	0.0651507	-0.108068	0.294771	0.455328	-0.212982	0.0224183	-0.337973	-0.049582	0.198544	-0.498234	-0.163592	0.128339	-0.413804	0.0603466
ALDH3B2	0.20319	-0.283389	0	0.0599103	0.941274	-0.454839	-1.00377	-1.29181	-1.62315	-1.55271	1.44016	0.803639	-0.537806	0.209003	-0.146842	0.339684	0.279318
ALDH4A1	-0.600754	-0.238259	-0.0278437	-0.216803	0.0271766	-0.247636	0.826362	0.237637	0.00379205	0.904531	0.730365	0.0154595	-1.34764	-0.0844841	0.0865374	0.362402	-0.047936
ALDH5A1	-0.10012	-0.326996	0	-0.0477667	0.83709	-0.440012	0.90927	0.601683	0.342622	0.845194	0.950101	0.829246	-0.357553	-0.380525	-0.50094	-1.11489	0.409801
ALDH6A1	-0.14024	-0.420145	-0.160915	0.101375	0.152629	0.0196724	0.52866	-0.164281	0.178333	0.639502	0	0.823316	-0.456869	-0.887284	-0.425746	-0.106351	0.317476
ALDH7A1	0.186666	-0.0460838	-0.413401	0.0793511	0.866164	-0.355947	1.06274	0.0957274	-0.0598497	0.509326	0.0102162	0.887433	-0.476623	-0.143564	-0.117076	-0.111421	0.0911919
ALDH8A1	0.436421	-0.429706	1.09197	-0.340942	0.0413251	0.794658	0.985971	-0.337514	0.569431	0.127317	-0.581533	-0.150115	-0.478182	-0.423606	0	0.866441	-1.51029
ALDH9A1	0.226377	-0.424234	0.231352	0.16286	0.613238	-0.291117	0.147502	-0.376119	-0.0844593	0.271273	0	0.393079	-0.364751	-0.0503902	-0.145377	-0.203399	0.359476
ALDOA	-0.63992	-1.11437	-0.698704	-0.768868	-0.0800295	-0.31543	0.756493	0.0686998	-0.0370207	0.482719	0.88619	0	0.00781727	0.165976	0.205279	0.250384	-0.0755796
ALDOAP2	0	0.674741	-0.369665	0.203992	-1.24526	0.455603	-0.233062	-0.455937	-0.507981	-0.21635	-0.401485	0.548233	0.367754	0.99427	1.159	1.6178	-0.597983
ALDOB	-0.1144	-0.796877	-0.549657	-0.24669	-0.220548	-0.0280423	1.03079	-0.44515	-0.2606	0.982802	-0.336792	0.595182	-0.186828	-1.2555	1.16523	0.319294	0.575719
ALDOC	-0.766508	-1.17225	-0.585274	-0.580646	-0.30761	0.294874	0	0.123822	0.508737	0.475451	1.33964	0.269555	-1.14713	-0.974998	0.283238	-0.852599	0.260463
ALG1	0.103013	0.595918	0.412685	0.274049	0.409976	-0.201729	-0.213586	-0.786762	-0.454611	-0.255232	0.0926745	-0.190411	0.034416	0.385814	0.267896	-0.134636	-0.339177
ALG10	0.449782	0.903012	0.625024	0.817789	0.84964	0	-0.409745	-0.146992	-0.247681	-0.329308	-0.951867	0.337077	-0.11053	0.285283	0.0202484	-0.722369	-0.186765
ALG10B	0.0293136	0.0983262	0.0965619	-0.000576	0.234317	0.306503	-0.0867896	0.0471907	0	0.210462	-1.10121	0.199392	-0.809748	-0.780407	-0.23613	-1.13153	-0.444714
ALG11	-0.0407839	0	0.056551	0.352856	0.118459	-0.233698	0.0332155	0.0930634	0.0238829	0.44883	-0.612946	-0.405895	-0.295046	-0.656687	-0.223796	-0.380856	0.356356
ALG12	-0.334513	-0.529266	-0.253078	-0.72089	-0.112273	0.474144	0.538708	0.155349	-0.0328579	0.562129	0.726663	-0.056334	0	-0.0518069	0.331644	0.146691	0.253507
ALG13	0.33923	0.51785	0.281081	0.210988	-0.203009	-0.141945	-0.358078	0.127633	-0.0348589	-0.160082	-0.0412626	-0.481173	0.0370646	0.336762	-0.321876	0.113237	-0.184311
ALG14	-0.343064	0.0612459	-0.052455	0.201098	0	-0.140533	0.144154	-0.367376	-0.0193262	0.368101	0.520701	-0.23161	-0.340933	0.594185	0.393145	0.288056	-0.126845
ALG1L	-0.301228	0.153177	0	-0.1343	-0.322133	0.697129	0.00616455	-0.372481	-0.109547	-0.124583	0.426291	0.0119877	-0.420212	0.456217	0.428099	0.302773	-0.395881
ALG1L2	-0.130039	-0.0339425	-0.0001495	-0.0876007	-0.187536	-0.389615	0.260208	-0.118894	-0.0724378	-0.164504	0.56025	-0.0309436	-0.307622	0.527991	0.307897	0.213318	-0.0464461
ALG2	-0.122508	0.0396977	0.0502892	0.260657	0.201766	-0.222048	0.0630033	-0.454539	-0.184977	-0.142124	0.575252	-0.262964	1.16512	0.541673	-0.386705	-0.0779226	-0.0698738
ALG3	-0.0949392	-0.673429	-0.308516	-0.463005	-0.543488	0.190818	0.257927	-0.0845442	0.439093	0.454586	1.24248	0	-0.0960503	0.232757	0.274265	0.237256	-0.358915
ALG5	0.0144615	0.0487232	0	0.160752	-0.025362	0.218608	-0.322194	-0.578594	-0.232842	-0.199546	0.341619	-0.676253	-0.035532	0.616341	0.151136	0.474945	-0.222116
ALG6	0.298795	0.100305	0	-0.202631	-0.0394611	0.357288	0.190609	0.223949	0.333174	0.0101509	0.122111	-0.0478687	-0.385091	-0.120537	-0.562354	-0.752349	-0.689921
ALG8	0.0179968	-0.248688	-0.332028	-0.0757761	-0.00347805	0.0915718	-0.12394	0	0.105577	0.23449	0.511163	-0.471272	0.0595121	0.0754871	0.394636	-0.0737562	-0.0151949
ALG9	-0.189824	-0.225263	-0.128939	0.117961	-0.527234	0.109099	0.027822	0	0.387436	0.766921	0.462513	-0.0523086	-0.194504	0.466765	0.422651	-0.464359	-0.110129
ALK	-0.618668	-0.251215	-0.876543	-0.48254	0.0388365	0.183233	0.562275	0.356553	0.26089	0.249203	0.347067	-0.409459	-0.556751	0	0.0302515	-0.352045	-0.679285
ALKBH1	-0.949841	-0.742125	-0.608109	-1.10272	-0.204632	0.175178	0.573092	0.117584	0.168893	0	1.06716	0.00281191	-0.271837	-0.462957	-0.335052	0.0482187	0.0712581
ALKBH2	-0.243071	-0.283273	-0.0617504	-0.302428	-0.0835075	0	0.282627	0.0991468	0.195414	0.27811	0.817406	-0.0935831	0.659888	0.949983	-0.276724	0.0855532	-0.712715
ALKBH3	-0.351758	-0.304854	-0.0233545	-0.289479	-0.140364	0.121418	0.543095	0.150099	-0.098208	0.0163488	0.900843	-0.0850205	-0.0597534	0.62108	0.456638	0.843272	0.186062
ALKBH4	-0.354239	-0.720919	0.147821	0	-0.018651	0.25224	0.41058	0.175403	0.201257	0.643709	0.278652	0.120635	-0.950626	-0.970102	-0.147577	-0.869252	-0.25369
ALKBH5	-0.623049	-0.549051	-0.342855	-0.329413	0.027029	-0.244309	0.514805	0.084321	-0.168035	0.12327	0.183706	-0.0466619	0.150932	-0.0694756	0.11784	0.205801	0.275342
ALKBH6	-0.319725	-0.261234	-0.183914	-0.278388	0.0906153	0.167107	0.424424	0.0751071	0.284267	0	0.799813	0.162293	-1.07946	-0.0981865	0.201672	-0.681555	-0.174573
ALKBH7	-0.854096	-0.878802	-0.655863	-0.616294	0	-0.0667772	1.0856	0.584713	0.299506	0.861768	1.20774	0.450657	-0.709147	0.102272	-0.354117	-0.0425463	0.459903
ALKBH8	-0.526903	-0.389342	0.236147	0.0316839	-0.293061	0.352965	0.626205	0.161602	0.193643	0.802428	-0.176394	0.301071	-0.897968	-1.71447	-0.0916726	-1.85394	-0.844887
ALLC	-0.342867	-0.297357	0.173284	-0.0860009	-0.188342	0.417257	0.733674	0.511444	0.427463	0.610295	0.5363	-0.182627	-0.424979	-0.0951033	0.312443	0	-0.154451
ALMS1	0.281011	0.690153	0.320862	0.58762	-0.12378	-0.0989981	0.215159	-0.197025	0.35815	0.213361	-0.777745	0.777309	-1.25416	-0.176818	-0.534597	-0.291327	-0.113174
ALMS1P	0.510114	0.602268	0.257873	0.850626	-0.261773	0.309646	0.0362086	-0.142009	-0.0371819	0.034132	-1.88528	0.30408	-1.30451	-1.54329	-0.192822	-0.575764	0
ALOX12	-0.431086	-0.780194	-0.66709	-0.292919	-0.301297	0.313538	1.48867	0.555463	0.449861	0.485803	0.543592	-0.307034	0.100791	0	0.140405	-0.215323	-0.560948
ALOX12B	-0.587976	0.0447102	0.0235052	-0.220584	-0.0111818	1.80624	-0.0836544	0.184948	-0.140228	-0.129803	0.0573711	0.407492	0.00388241	-0.0119276	-0.354184	0	0.107653
ALOX12P2	0.372354	-0.416616	-0.498463	-0.10858	-0.0908241	2.46553	2.82835	0.917799	0.632812	1.87707	0.74312	0	-0.266927	-0.0307961	0.315177	-0.0688705	-0.182828
ALOX15	-0.185305	0.0558579	-0.557735	-0.0282652	-0.220833	-0.0584376	0.165134	0.403594	0.474441	-0.122945	-0.21419	-0.353958	0.128746	-0.512693	0.148146	0.350471	-0.0495157
ALOX15B	2.34006	1.29695	3.58729	1.40845	-0.0536375	1.96686	0.419586	2.73133	1.35	-0.967669	-1.80524	-0.384709	-0.603639	0	-0.322314	-0.590675	-0.590653
ALOX5	0.748315	0.264425	0.495084	0.274061	-0.14477	0.927349	-0.0446765	0.500145	0.577753	-0.456659	-0.0343211	-1.43914	-0.100533	0.0167089	-0.750812	-0.258881	-1.21487
ALOX5AP	1.81692	1.30615	1.13054	0.809771	0.497515	1.55729	-1.46708	0.792639	0.615161	-1.05635	-0.114377	-2.51521	-1.45407	-0.811471	-3.55861	0	-2.85725
ALOXE3	-0.0590501	-0.148905	0	0.41516	0.706962	-0.300792	-1.0647	-1.32345	0.134499	-1.46562	-1.33433	0.849975	0.835298	0.440258	0.474847	0.577263	-0.280559
ALPI	0	-0.17041	0.578405	0.187026	-0.206106	-0.290139	0.203312	-0.506792	-0.460669	0.0615549	-0.505699	0.988442	-0.0468245	0.202209	-0.314511	0.865184	0.536509
ALPK1	0.871415	0.765406	0.375119	0.39124	0	-0.383481	-0.887586	-0.341297	-0.489003	-1.00092	-1.34772	-0.806432	0.788167	-0.0793488	-0.0423787	0.232583	-0.412828
ALPK2	-0.812284	-0.799593	-0.428016	-0.284925	0	-0.583767	0.013237	-0.381681	-0.372087	0.308213	0.673403	-0.130444	0.76722	0.382602	0.406067	0.335132	0.83817
ALPK3	-0.542213	-0.219151	-0.267152	0.105815	0.114147	-0.611034	0.134614	-0.0640516	-0.623787	0	-0.0693083	0.149958	0.360472	0.241669	-0.175591	0.869913	1.11242
ALPL	-0.191743	-0.542939	0.193883	-0.576738	-0.890276	0	0.620323	-0.220062	0.283878	0.0670562	0.869505	-0.829895	-1.10926	1.1793	-1.56979	1.68813	0.350816
ALPP	-0.0384741	0	-0.0548039	0.011797	0.858931	-1.29941	-1.13515	-1.13886	-1.09742	-0.837969	-0.46024	0.566809	0.83464	0.643413	0.33212	0.697085	0.709139
ALPPL2	-0.0105953	-0.198623	0.227671	0	0.758167	-1.35019	-0.276348	-0.72121	-0.798877	-0.798372	-0.128781	0.247212	0.477802	0.519412	0.269699	0.503191	0.419673
ALS2	-0.495098	-0.0084938	-0.0574752	0.143162	-0.0836288	-0.162899	0.0765433	-0.0793886	-0.112752	-0.0114365	0.392281	0.236499	-0.0048254	-0.0795545	0.283362	-0.269831	0.0833632
ALS2CL	-0.282012	0.0370111	-0.700452	-0.641796	-0.0953703	0.487073	0	-0.0339828	0.0180359	-0.704266	0.316796	0.0460243	0.513581	0.492046	-0.0347395	-0.0133858	0.208961
ALS2CR11	0.283249	-0.697944	0.641994	-0.336376	0.724133	1.02569	0.818081	1.1958	-0.257507	0	-1.87113	-0.154994	-1.58531	-0.445669	0.725499	-1.00972	0.83422
ALS2CR12	0	-0.235258	-0.0895886	-0.324509	0.399632	0.227024	0.488017	-0.00672579	0.105065	0.763048	0.0829186	0.627935	0.307331	-1.0051	-1.57247	-0.271879	-0.71174
ALS2CR8	0.389447	0.445773	-0.104269	0.284901	0.054069	0.220223	-0.204036	-0.0241075	0.122277	-0.266703	-1.59656	0.215815	-1.29925	-0.21191	0.0523162	-1.00144	0
ALX1	-2.05316	0.376989	-2.30101	-1.05474	0	1.83925	1.49748	1.80007	0.958333	0.746491	0.99476	-0.213996	-1.71386	0.295316	-0.843229	-1.9037	-2.19186
ALX3	-0.162079	-0.206931	0.422518	0.216398	-0.494189	-0.696732	-0.229491	-0.443931	2.04741	0.904417	-0.42298	0.542408	0.709723	0	-0.846092	0.767947	0.549628
ALX4	0.08232	-0.275703	-0.459851	-0.587452	0.272323	-0.0584276	0.364166	0.129543	0.0785348	0.244019	0.371587	0.534983	-0.00560975	-0.189577	0	-0.151836	-0.275364
AMACR	0.358919	-0.310456	0.809741	-0.0444984	0.792043	0.239283	0.893733	0.342495	-0.456583	-0.108982	0.166368	0.846411	-0.682315	-0.231967	0.76499	-1.74372	-0.193069
AMBN	-0.556747	-0.089591	0.721343	0.0587282	0.782513	-0.297881	-0.223623	-0.587183	-0.669807	-0.681951	0.275854	0.951837	-0.00685883	0	0.226342	0.971807	0.0974135
AMBP	-0.541295	-0.63875	-0.806941	1.61658	-0.38402	0.258457	1.25775	0.38939	0.356853	0.671187	0.741797	0.122748	-0.57922	-0.362839	0	-0.393578	-0.69416
AMBRA1	-0.242261	0.360052	-0.0919344	-0.0397434	-0.10296	0.644459	0.0554459	0.728342	0.367455	-0.0816228	-0.568969	0.107527	0.463367	-0.317689	0.0590065	-0.413733	-0.000427
AMD1	-0.534393	-0.608807	-0.520145	-0.285307	0.0960708	-0.56603	0.0944128	-0.337134	-0.615392	0.20451	0.101494	-0.0499668	0.71721	0.707824	-0.170027	1.19653	1.13019
AMDHD1	0.0736241	0	0.971196	-0.680571	-1.2689	0.264391	-0.30767	0.332272	-0.108698	-2.34333	0.301323	-2.21267	1.02708	0.299883	0.342795	-0.38859	-0.365747
AMDHD2	0.696487	0.262042	0.406469	-0.018486	-0.257001	0.0986099	-0.0575991	0.0902967	0.590282	0.194705	0.130987	-0.0438871	-1.04888	0	-0.444019	-0.55342	-0.984769
AMELX	-0.278367	-0.630779	0	-0.136603	-0.134179	0.530447	0.905172	0.699442	0.954056	0.622673	1.4797	-0.115136	-0.238405	-0.0348697	0.32603	0.206597	-0.348959
AMELY	-0.162128	-0.496115	-0.386887	-0.0039916	0	0.489409	1.01896	0.832556	0.711515	0.667086	0.840894	-0.0793681	-0.204246	0.00676298	0.3871	-0.0219822	-0.278127
AMFR	-0.937913	-0.371702	-0.105355	-0.366255	-0.812157	0.181147	0.564077	-0.514441	0.0984817	0.714492	0.170819	-0.176422	0.571256	-0.286113	0.449437	0.790683	0.0482192
AMH	0.528999	-0.596743	0.428551	0.0860848	0.869588	-0.291943	-0.70145	0.0409498	-0.192142	0.894674	0.959219	-0.0134249	-0.241059	-0.0952978	-0.273443	0	0.507211
AMHR2	-0.438208	-0.456952	0	-0.608647	0.25505	-0.0257263	0.876537	2.20854	1.02072	0.185143	0.656512	2.01203	-0.262332	-0.361881	2.14322	-0.722971	-0.981742
AMICA1	0.967671	1.36648	0.412844	0.391816	-0.0195162	0.804783	0.53002	0.942928	1.11844	0.160179	-0.912131	-1.39916	-1.91284	-1.41539	-2.14225	-2.2202	-1.60646
AMIGO1	-0.489902	-0.42431	0.0637102	0.038168	0.535165	-0.665001	-0.142978	-0.307146	-0.634715	0.227593	0	0.149734	0.256512	-0.853889	0.348819	-0.566092	0.629349
AMIGO2	1.53192	1.4186	1.03291	1.31709	0.508873	0.668388	-0.946748	0.400088	1.42616	0	-0.346457	-0.321627	-0.263545	-0.928601	-0.890549	-0.377499	-0.5127
AMIGO3	-0.216134	-0.249148	-0.229286	-0.000551939	-0.132004	0.605587	0.706512	0.576489	0.504264	0.553043	0.288522	0.108285	-0.235172	0.114712	-0.115316	0.0233824	0.212233
AMMECR1	0.456295	0.713662	0.750426	0.620745	-0.00196219	-0.41102	-1.06771	-0.0827239	-0.677489	-0.752626	-1.30998	-0.27677	0.191203	0.172202	-0.899601	0.199841	-0.540055
AMMECR1L	-0.105329	0.0922928	0.348716	0.15345	0.280437	-0.173078	-0.250878	0	-0.221111	-0.0148087	-0.101571	-0.318752	0.712935	0.498778	-0.276585	0.551439	0.0742264
AMN	0.261683	0	0.40301	0.625979	0.653743	-2.50034	-1.45723	-1.87401	-1.55297	-1.4116	-1.43932	-0.115932	0.272368	0.375253	0.182984	0.283212	-0.100926
AMN1	-0.403703	-0.236528	-0.096724	-0.221033	-0.454653	0.164161	0	-0.0441813	-0.349058	0.137436	0.579725	0.379843	1.00576	-0.496609	0.280927	0.388235	0.618323
AMOT	-0.181045	0.316504	0.646242	-0.0568382	0.347533	0.470354	0.235421	0.487318	0.221264	0.214384	0.787682	0.731385	-0.500883	-0.319641	0.12007	-0.547383	-0.541548
AMOTL1	-0.132373	0.0706	0.21128	0.368158	0.178357	-0.754002	-0.742666	-0.537274	-0.754803	-0.381294	-0.715531	0.15	-0.242106	0.118793	0.30283	-0.0787854	0.1738
AMOTL2	0.0425148	0.153552	-0.341573	0	0.210508	0.478143	1.34549	-0.305416	0.262115	1.03718	-0.312385	0.386652	-0.296761	-0.972449	-0.358318	-0.201634	-0.436951
AMPD1	1.44504	3.10095	2.28203	0.203588	0.649553	2.3975	-0.227366	0.623581	0.786744	0.242354	-1.31938	-1.89686	-2.48424	-2.28654	-1.93503	-2.31204	-2.58259
AMPD2	-0.0228114	0.461705	-0.0702639	-0.36165	-0.75895	0.471267	-0.718081	0.172641	0	-0.71967	0.265748	-0.662184	0.719707	0.502133	0.145957	1.26749	-0.0732851
AMPD3	1.2073	0.66566	0.338233	0.52372	0.226586	-0.514737	-1.31229	-0.941422	-0.973915	-0.337134	-2.10953	-0.506531	-0.126112	-0.503365	0.690177	-0.353706	0.0780222
AMPH	-0.770188	-0.283148	0.364155	0.384357	0.157186	0	-0.942202	0.99682	0.217098	-0.264306	-0.551853	1.33182	-0.661707	-0.921612	3.37295	-0.00697517	0.798951
AMT	-0.554592	-0.46155	-0.425683	-0.562167	0.0262108	0.205318	0.509811	0.182122	0.261117	-0.27758	0.200716	0.355021	-1.13877	-1.76449	0.0607662	-1.08486	0.100178
AMTN	-0.515745	-0.861538	0.664569	-0.375509	-0.364778	0.208819	0.681545	0.47169	0.37576	0.413627	0.433329	-0.442836	-0.566802	0.740846	0	-0.371446	-0.666269
AMY1C	-0.275504	0.0931649	-0.0997419	-0.182378	0.163186	0.579553	0.748086	0.899491	0.462014	0.65098	-1.19297	0.882422	-0.814761	-0.00297785	0.0442114	-0.514316	-0.370109
AMZ1	-0.156146	0.391088	0.28987	-0.00937843	-0.265458	-0.446859	-0.7375	-0.288608	-0.400916	-0.846636	-1.4966	-0.651484	-0.319295	-0.18889	1.16647	-0.0997341	0.431538
AMZ2	-0.143356	-0.167875	0.016088	-0.0623479	-0.23255	0.128853	0.779265	0.238232	0.00692462	0.454217	0.240471	0.490177	-0.945903	-0.0987744	0.0414257	-0.327715	0.323194
AMZ2P1	-0.353528	0.393349	0.276499	-0.0983548	-0.280374	-0.0524254	0.570999	0.110777	0.0380077	0.229026	0.123159	0.202886	-0.867687	-0.203003	0.0484636	-0.553512	0.32514
ANAPC1	0.13369	-0.0955201	0.0519168	-0.0245687	-0.227081	0.225664	-0.349463	0.187479	0.357447	0.0913106	-0.498495	0.2887	0.382052	-0.244913	0.0699266	0.0162034	-0.41573
ANAPC10	-0.376763	-0.339179	-0.14591	0.0398092	0.0797949	-0.206803	0.148491	-0.184857	-0.21602	0.276518	0.376539	0.130188	-0.155609	0	0.144425	-0.209366	0.103717
ANAPC11	-0.427485	-0.662836	-0.461641	-0.354339	-0.00382614	-0.300064	0.188643	-0.124312	-0.0730486	0.355835	0.755178	0	0.343951	0.48357	0.595952	0.577167	0.414262
ANAPC13	-0.809191	-0.584792	-0.405991	0	-0.0460415	-0.3542	0.374131	-0.169373	0.0544443	0.239675	0.167659	0.12571	-0.893187	0.424521	-0.146436	0.119747	0.314937
ANAPC16	0.0510292	-0.223153	-0.0637503	0.426208	0.306243	-0.853481	-0.134516	-0.31962	-0.355258	0.0901337	-0.44787	-0.16989	0	0.0392933	0.135405	0.0767975	0.770555
ANAPC2	-0.844471	-0.634431	-0.336034	-1.0061	-0.439454	0.137099	0.722396	0.18632	0.0971642	0.343715	0.691854	0.0424705	-0.672744	-0.787052	0	-0.446265	0.0581088
ANAPC4	0.381071	0.33211	0.220746	0.133784	0	-0.112268	0.174647	-0.0132055	0.163274	0.0709181	-0.207068	0.00960922	-0.551771	-0.409872	-0.358749	-0.339859	-0.100976
ANAPC5	-0.297111	-0.406679	-0.340129	-0.346188	-0.245399	0.0724983	0.191543	0	0.410549	0.315469	0.700413	0.0170279	-0.448314	0.0256376	-0.164276	-0.0435228	0.0246983
ANAPC7	-0.0758929	-0.123992	-0.104652	0	0.0236797	0.0434933	0.0526476	-0.115743	-0.480239	-0.0420108	-0.0796089	-0.0416803	0.377731	0.117515	0.443139	0.208789	0.496161
ANG	0	0.28921	0.489138	0.0754824	-0.275194	1.18667	0.180566	0.232327	-0.151239	0.781688	-0.534983	-0.14995	-0.147043	-0.903636	0.501173	-0.59827	-0.480173
ANGEL1	-0.276631	-0.387122	-0.436527	-0.740398	-0.332899	0.064229	0.339535	0.247265	0.059587	-0.00611353	0.33251	0.541075	0.280405	-0.616906	0.859311	-0.515417	0
ANGEL2	0.257271	0.331326	0.142497	0.336324	0.0888572	0.191848	0.17594	0.11519	-0.00112033	0.141317	-0.818011	0.119525	-0.45466	-0.273587	-0.303533	-0.393757	-0.403983
ANGPT1	1.12326	0.904497	0.686007	0.823936	0	0.718873	-0.655339	0.321649	0.547569	0.0631151	-1.79966	-0.319357	-2.75034	-1.76175	-0.61395	-2.43406	-1.25038
ANGPT2	0.152342	0	-0.806938	0.0783777	-0.612546	-0.742397	0.519754	-1.18939	-0.0919371	1.335	2.21676	-1.50862	4.79681	1.01637	-1.10881	1.98209	-0.260925
ANGPT4	0.676233	-0.465424	0.178082	-0.83941	0	-0.63753	-0.0283828	-0.770175	1.08628	-0.912523	-0.755076	0.4313	0.870141	0.18703	0.857101	-0.123668	0.773853
ANGPTL1	0.430389	0.38433	1.2793	1.04927	-0.144445	1.01935	1.78632	0.0672023	-0.0690575	1.45558	-1.2827	-0.09446	-2.53874	-0.634177	-2.12187	-0.597547	-0.541246
ANGPTL2	0	-0.0154867	-0.0401754	0.367194	0.95746	0.342151	-0.0612097	-0.454984	0.177527	-0.212752	2.14264	-0.231565	1.63887	1.5128	-0.281047	1.94667	-0.471408
ANGPTL3	-0.139201	-0.498811	-0.396646	0	0.0245323	0.588345	1.04116	0.824284	0.756927	0.783466	1.4544	-0.0973096	-0.22857	-0.0113492	0.377995	-0.0329962	-0.306195
ANGPTL4	-0.991005	-0.254785	0	1.1767	-0.884791	-0.251729	0.25644	1.59618	-0.316006	0.61613	0.805902	-4.10362	3.35441	2.0768	-1.39958	1.77886	-3.62501
ANGPTL5	0.479058	2.64324	2.51914	-0.0530911	0.829365	2.47366	0	-0.0602007	1.4613	0.749275	-0.483701	-0.280277	-1.71002	-1.98525	0.758454	-3.38447	-1.61774
ANGPTL6	0.635633	0	0.217674	0.974837	-0.402742	-0.791462	-1.45914	-0.78716	0.667285	-0.628643	-0.875203	0.540199	-0.588096	0.548646	-0.00995064	0.133842	0.652903
ANGPTL7	0	1.66391	1.62347	-2.06467	0.551302	1.1779	-1.08524	0.012176	-2.36661	0.682231	-4.07391	0.493144	-3.05646	-4.17141	1.42768	-3.18429	-1.71605
ANK1	-0.732404	-0.172255	-0.415158	-0.225436	0.567192	-0.0634842	0.727142	-0.00737858	0.449506	-0.2263	0.639337	0.21189	0.0176282	-0.284591	1.2011	0.147857	1.38048
ANK2	-0.0806902	-0.55645	-0.147291	0.229707	0.921329	-1.0835	-0.644443	-0.542188	-0.417755	-0.302972	-0.511751	1.17464	1.32432	0.75751	1.2027	0.579636	1.09113
ANK3	-0.567358	-0.254366	-0.575274	-0.120318	-0.792706	-0.181919	0.104786	0.0622093	-0.261449	-0.12069	-1.13789	0.807625	0.0195577	0.54243	0.628779	0.0937298	-0.655166
ANKAR	0.119228	0.25916	-0.185971	0.154414	-0.592208	0.845458	0.244917	0.362192	0.43921	0.247355	-2.42752	0	-2.00915	-0.6482	-0.372647	-1.97054	-0.0937223
ANKDD1A	0.378453	0.815538	0.435447	0.376506	0.282009	0.428748	-0.238704	-0.759532	-0.320525	-0.982622	-0.47357	-0.853832	0.211576	0.598253	-0.173718	0.712938	-0.956838
ANKDD1B	-0.319832	-0.646326	-0.539384	-0.153045	4.08066	0.322456	0.860089	0.689707	0.544103	0.490872	0.680415	-0.237515	-0.363958	-0.153422	0.227802	-0.180551	0
ANKFN1	-0.365001	0.840481	-0.750469	-0.362525	-0.376314	0.131618	0.932128	0.840972	0.354987	1.06874	1.24444	0.6496	-0.590984	-0.377084	0	-0.404639	-0.695697
ANKFY1	0.322629	0.556659	0.171121	0.180747	0.265007	-0.356945	-1.05541	-0.265535	-0.731093	-0.760605	-2.17734	-0.238261	-0.296392	0.232053	0.176906	-0.0149167	0.755
ANKH	-0.604073	-0.332213	-0.413321	-0.0393753	0.15927	-0.290004	0.0954492	-0.0920391	-0.433283	0.138419	0.741083	0.462582	0.172376	0.433636	0.25392	0.433566	-0.0844584
ANKHD1	-0.498622	-0.268853	-0.263792	-0.294757	-0.304053	0	0.500835	0.30548	0.20959	0.475387	0.921989	0.307378	-0.195223	1.82096	-0.666594	1.63534	-0.229835
ANKHD1-EIF4EBP3	-0.168359	-0.714474	-0.317419	-0.435213	0.0613632	0	1.23962	0.817047	0.267287	0.528494	0.0939951	1.57703	-0.732359	-0.688142	-0.927869	-0.510929	0.261425
ANKIB1	0.0468826	-0.111259	-0.224104	-0.156392	-0.201426	0.29162	0.402328	0.170593	0.22564	0.492562	0.312809	0	-0.150666	-0.773841	-0.449664	-0.65589	0.501745
ANKK1	-0.162931	1.08589	0.182837	0.311813	-0.394432	1.97023	1.4713	1.2965	2.32767	1.34072	0	-0.561184	-0.295512	-1.1002	-0.434716	-0.878619	-1.3299
ANKLE1	-0.546311	-0.902713	-0.252157	-0.417775	-0.372739	0.271043	0.607068	0.374654	0.334981	0.647048	0.582335	-0.389694	1.24903	-0.347466	0	0.434999	-0.667858
ANKLE2	-0.461942	-0.0458586	-0.0950906	-0.13997	-0.16554	-0.231417	0.107937	-0.153054	0.0460036	-0.0115559	0.0280588	0.0407209	0.588345	0.208358	-0.656209	0.482394	-0.275034
ANKMY1	0.568987	1.43512	1.28739	0.480792	0.392575	0.0066483	-0.453048	-0.497095	-0.511948	-0.650085	-1.57399	-0.159931	-0.294249	-0.161592	-0.304257	-0.285999	-0.30931
ANKMY2	-0.549955	-0.263619	-0.46371	0.0648222	0.28229	-0.152235	0.474746	0.076355	0	0.284389	0.0396738	0.0922785	-0.810843	-1.41406	0.0386648	-0.967196	-0.137481
ANKRA2	-0.330986	0	0.0766144	0.0217447	0.0753613	0.413996	0.489096	0.62883	-0.0332575	0.66618	-0.108346	0.650995	-0.381619	-0.889551	-0.185141	-0.540554	-0.077076
ANKRD1	-1.2467	0.214477	-0.480298	0	-0.0267191	-0.426803	1.22464	-0.0201063	-0.379395	0.542133	0.0448513	-0.39261	0.10354	0.442011	0.34135	0.783286	-0.827691
ANKRD10	-0.248673	-0.0305903	-0.130202	-0.242578	-0.420895	0.323581	0.409229	0.323412	0.596754	0.279869	0.0351436	0.206407	0.16732	0.0316129	-0.147196	0.443603	-0.186647
ANKRD11	-0.00213588	0.185668	0.199202	0.0179762	0.0255425	-0.605647	-0.293645	-0.482449	-0.377695	0.00912953	-0.834763	-0.017399	0.651047	0.033113	0.180253	-0.0830128	-0.323457
ANKRD12	0.260128	0.590676	0.0251729	0.372989	-0.423383	-0.366151	-0.406102	-1.2158	-0.622793	-0.951587	-1.31291	-0.287248	0.0149868	-0.23993	-0.379188	0.157843	0.15688
ANKRD13A	0.417447	0.10124	-0.149352	-0.0581915	0.0330112	-0.141401	-0.205495	-0.0820124	0.344663	-0.110602	0.180882	-0.0236735	0.32513	0.817116	-0.117609	1.41976	0.000615595
ANKRD13B	-0.531331	-0.589117	-0.602936	-0.359974	0.559402	-0.412869	-0.121701	-0.373656	-0.235244	-0.210778	0.232044	0.268152	0.0757844	0.319211	0.201658	-0.121515	0.0653138
ANKRD13C	0.0931556	0.368146	0.283078	0.588199	0.041374	-0.266485	-0.0743904	0.0896061	-0.0370884	0.0467446	-0.624941	-0.176075	0.594121	-0.323223	-0.272121	0.0909388	0.0421054
ANKRD13D	0.648233	0.375753	0.217571	0.181281	-0.509491	0.394483	-0.0272055	0.287003	0.568513	0	-0.447017	-0.928433	-0.118026	-0.558078	0.303621	-0.223164	-0.373183
ANKRD16	0.0269012	0.365182	0.205483	0.306707	-0.00550938	0	0.270326	0.375216	0.181036	-0.268821	0.455758	-0.299502	-0.576129	-0.0723228	-0.457138	-0.750931	-0.52075
ANKRD17	-0.225353	0.0305653	0.0233898	0.0941408	-0.0611145	-0.341024	-0.00131416	-0.279187	-0.240157	0.0643334	-0.176898	0.365757	0.587	-0.00702262	0.02072	0.674396	0.46048
ANKRD18A	0.521211	0.646965	0.0464816	-0.213378	1.04319	-0.756784	-0.178395	0	-1.59939	-1.5474	-1.50851	2.27311	-0.749211	-0.546877	1.63793	0.764765	1.79106
ANKRD18B	0	0.267209	-0.71297	0.233312	1.26495	-1.23858	-1.34542	-0.23645	-0.443026	0.0235772	-1.45745	1.34484	-1.33444	-0.514159	1.23427	0.0244055	0.375938
ANKRD19P	-0.478747	0.0112581	-0.506444	0.571174	0.0796089	-0.517999	-0.120689	0.255239	-0.188707	-0.0126119	-0.0228896	0.0166194	-0.088783	-0.144671	0.744826	0.265221	0.290452
ANKRD2	-1.77349	-2.09275	-2.41252	-1.98062	-0.0893316	0.0279493	1.44324	0.932383	0	0.711573	2.24829	-0.441344	-1.93025	2.31693	-1.72707	0.665879	0.464856
ANKRD20A1	-0.463447	0.291292	-0.0821385	0.051487	-0.312017	1.46459	-0.00892258	1.19381	0.60424	0.804497	-1.28574	1.0337	-0.47572	-0.217234	1.9293	-0.324402	0
ANKRD20A2	-0.406785	0.339484	-0.963455	0.100299	0.0486962	0.394653	-0.572104	0.568749	0.328986	0.369598	-0.943145	0.51073	-1.63259	-0.504014	1.44228	-1.03111	-0.0798837
ANKRD20A4	-0.859117	-1.21097	-0.214698	-0.713795	0.702744	1.20914	0.282134	0.934833	0	0.195463	0.111336	0.514963	-0.943047	-0.724	0.516267	-0.758326	-1.05223
ANKRD20A5P	0.250439	1.04361	-0.0902109	0.286299	0.549462	0.111696	-1.02574	0.175737	0.0241801	-0.0698101	-2.82494	0.692518	-0.917694	-0.647415	0.968974	-0.830864	-0.161351
ANKRD20A8P	0.390322	0.402551	-0.956744	-0.437965	1.0957	-0.348295	-0.981579	0	0.391292	0.538282	0.190806	1.47014	-1.96739	-0.470048	-0.0762687	-0.682944	0.153952
ANKRD20A9P	0.827272	1.19376	-0.787671	0.223197	-0.291401	-0.730664	-0.627018	-0.371993	0.194472	0.628799	-1.05085	1.10035	-1.3389	-0.215264	0.848598	-0.67555	-0.550901
ANKRD22	5.42314	2.85872	3.09322	4.89109	1.25133	0.923762	-0.327205	2.09869	2.74217	-0.637082	-0.543779	-1.29116	-1.43777	0	-0.860122	-1.22851	-1.56469
ANKRD23	-1.30238	0.401743	-1.0733	-0.627229	0.156193	-0.291899	1.23871	-0.267198	0.508667	-0.691745	3.16803	0.336818	-0.920176	1.09979	2.67257	0.57501	0.383621
ANKRD24	0.218216	-0.400298	0	0.27831	-0.497153	1.54178	-0.878237	-0.553154	-1.32964	0.440202	-0.70027	-0.164505	0.102001	0.504227	0.26459	-0.401701	0.305839
ANKRD26	-0.338142	-0.26142	-0.257528	0.10615	0.325216	-0.161715	-0.170137	-0.340704	-0.0284572	0.0123222	0.355946	0.546807	-0.241493	-1.52804	0.263775	-0.313638	0.922427
ANKRD26P1	-1.44291	-0.259827	0.981543	-0.0808974	0.251596	0.217369	-0.280445	-0.481241	-0.581269	-0.0105104	-0.109112	-0.425126	0.268754	-0.843782	0.797169	0.631453	-0.523143
ANKRD26P3	-0.161971	-0.528823	0.0212116	-0.0244575	-0.03583	0.471225	0.987099	0.762984	0.702878	0.844815	0.804699	-0.0756807	-0.218874	0	0.373791	-0.0289879	-0.323859
ANKRD27	-0.0361392	-0.215529	-0.194192	-0.146928	-0.0508933	0.146964	0.0550759	0.0477808	-0.193498	0.369246	-0.648619	-0.14465	0.0560281	0.300555	0.163877	0.109125	0.0743234
ANKRD28	-0.177376	-0.431614	-0.325017	-0.546051	-0.506641	0.0541506	0.222065	-0.0902758	0.0265598	0.346327	0.0122328	-0.0843334	0.180914	0	-0.415023	0.288763	0.685094
ANKRD29	0.326237	0.667694	0.595502	0.318854	-0.0484695	0.283587	-0.362905	0	1.00908	-0.435389	-0.022018	0.939787	-0.431817	-1.05152	-0.725938	-1.4901	0.227903
ANKRD30A	-0.142791	-0.514262	-0.406121	0.0776801	-0.0321639	1.30939	1.19251	0.833131	0.704254	0.81001	1.29973	0.402248	-0.221143	-0.00699186	0.373484	-0.0300679	-0.331018
ANKRD30B	0.773638	-0.32305	-0.186096	-0.368547	0.0145038	1.07553	0.630927	0.525572	0.751542	0.54127	0.791281	-0.42242	-0.476315	0.284725	0.0214187	0.45316	-0.0865494
ANKRD30BL	0.694075	1.67317	0.895356	1.00365	0.405207	-0.810316	-1.00371	-0.809686	-0.233171	-1.93959	-1.82171	0.564046	0.227107	0.210656	0	-0.244527	-0.0115581
ANKRD30BP2	-0.0460828	0.9401	0.735867	0.757203	-0.382047	0.49442	0.651481	0.497244	0.78983	-0.208632	-0.244651	-1.10707	-0.694216	-0.850649	-0.339505	0.0676297	-1.01536
ANKRD31	1.1559	0.2268	0.417182	-0.238569	-0.387971	0.159041	0.669868	0.422341	0.337359	0.435541	1.13797	-0.418938	-0.535907	-0.323431	0.0296288	0.560277	-0.324146
ANKRD32	0.457649	0.309307	0.0114696	0.413316	-0.226402	-0.16296	-0.11162	0.0948749	0.369953	0.389089	-1.21938	0.185904	-0.999604	-0.932906	-0.392965	-1.33831	0.285873
ANKRD33	-0.0384283	-0.0393867	0	0.0667596	0.239802	-0.825705	-1.0712	-1.23019	-0.883108	-1.10944	-0.955169	0.00572872	0.269174	0.125616	0.379082	0.279389	0.40621
ANKRD33B	-1.07588	-1.4624	-0.447484	0	0.381677	0.733616	0.710999	0.0730748	0.486907	0.252532	-0.53255	0.740398	-1.23074	-2.8295	-1.13384	-2.79493	0.105377
ANKRD34A	-0.0215712	0.288755	-0.616967	0.0559254	-0.103417	0.364179	1.70254	-0.771772	-0.297564	-0.53013	1.08929	0	-0.502527	0.964756	1.72441	-0.332951	0.378313
ANKRD34B	-0.323937	-0.647691	-0.563881	-0.186605	-0.189093	2.56057	0.873016	0.68054	2.38572	0.766254	0.661313	-0.0752893	-0.0282607	0	0.36705	0.0154095	-0.341498
ANKRD34C	-0.856414	-0.674079	0.0676775	-0.718081	-0.695006	0.732421	0.273381	0.0541973	0	0.444119	0.116987	0.911778	-0.689125	-0.66134	-0.340173	0.479978	-1.00794
ANKRD35	-0.037221	0.565224	0.377435	0.015687	-0.183873	0.945532	-0.0449533	-0.461379	-0.191795	0.330536	0	-0.696547	-0.622461	0.133312	0.350288	0.769092	-0.697439
ANKRD36	1.14503	1.43627	1.0867	1.16206	0.373644	-0.130645	-0.31539	-0.380303	0.900459	-0.530965	-1.91941	0.690408	-0.24177	-0.372963	0.233032	-0.870856	-0.457796
ANKRD36B	0.669406	1.30065	0.729094	0.492295	-0.273199	0.352414	-0.136361	0.198944	0.795262	-0.187989	-2.75957	0.356209	-1.45632	-1.1831	-0.15144	-1.94137	-1.41392
ANKRD36BP1	0.620632	0.215202	0.175016	0.0255394	-0.420165	0.640707	-0.755629	0.274009	0.418963	0	-0.1061	-0.627778	-0.036129	-0.193228	-0.952844	0.0198131	-0.916986
ANKRD36BP2	1.2609	1.5729	0.955625	1.24481	-0.2495	0.244661	-0.191494	0.367818	1.9043	0	-2.28499	0.0997381	-1.1937	-1.27224	-0.491407	-1.82888	-1.08801
ANKRD37	-0.411412	0	-0.113903	-0.525746	0.0653505	0.306085	-0.130507	-0.706154	-0.719684	0.095788	-0.475136	-0.911549	1.04741	0.785449	0.0227499	1.44655	0.0726891
ANKRD39	-0.241305	-0.341136	-0.390133	0.0760136	0.21712	-0.570643	0.376019	-0.575549	-0.191293	0.0188942	0.358117	0.179907	-0.588901	-0.0746088	0.315529	0	0.595001
ANKRD40	0	-0.055335	0.0715904	-0.0896683	0.480633	-0.976257	-0.404317	-0.0804472	-0.421558	-0.0373421	0.137121	-0.131704	1.14252	0.520851	0.168314	0.64622	0.506382
ANKRD42	-0.268969	-0.140652	-0.0670446	-0.0551972	0.23445	0.273432	0.0747922	-0.0343835	-0.143964	0.246637	0.0515914	0.345045	0.0688187	-0.317036	0.856134	-0.81581	-0.249693
ANKRD43	-0.0237157	0.477891	0.704908	-0.149752	-0.0882988	-0.44577	0.0295954	-0.682964	-0.984947	0.751519	-0.819743	-0.0374699	-0.0158558	0.033226	0.173446	-0.0740874	1.85101
ANKRD44	2.12251	2.39183	1.47316	1.39404	-0.278405	0.630056	0.128518	0.59955	0.478256	-0.231819	-0.509301	-0.247676	-0.939458	-0.692812	-0.2637	-0.253087	-0.563628
ANKRD45	0.070056	0.594171	0	0.206085	-0.0497103	-0.302933	-1.12461	-0.317304	-1.05064	-0.897262	-2.1279	-0.432745	0.060092	0.0697537	0.307371	0.288706	0.220324
ANKRD46	-0.344537	-0.263743	-0.189065	0.0197742	0.12126	0.256824	0.758395	0.358168	0.295073	0.580075	0.427162	0.117009	-0.278646	-0.270826	0.0524454	-0.337392	-0.100244
ANKRD49	0.531718	0.454906	0.3924	0.385337	-0.171713	0.233292	-0.0187273	0	-0.0477724	0.155555	-0.164693	-0.550682	0.0972662	-0.151583	0.0981627	-0.34881	-0.688554
ANKRD5	0.88036	-0.64882	-0.335521	-0.904057	-1.22197	-0.0369508	0.0728681	-0.375968	-0.549102	0.606844	-0.207463	0.57123	0.647881	-0.347654	0.640294	-0.0696471	-0.220017
ANKRD50	-0.340156	0.152523	-0.11673	-0.282861	0.342751	-0.0207944	0.478374	0.686034	-0.107491	0.955878	0	0.469606	-0.0908632	-0.323464	0.0688372	-0.679931	0.663441
ANKRD52	-0.219308	-0.133776	-0.126152	0	-0.107565	0.0351257	0.040473	0.0177202	0.140946	0.0663366	0.206011	-0.409692	-0.121343	0.149121	0.0813293	-0.227115	-0.0655975
ANKRD53	-0.262218	0	-0.0738106	-1.00931	-0.319639	0.153732	0.69714	0.27856	0.351768	0.0383863	0.255414	0.388506	-0.677849	-0.11384	-0.0652637	0.246777	-0.194657
ANKRD54	-0.247368	-0.421716	-0.34553	-0.343384	-0.345736	-0.0870705	0.104305	-0.163309	0.0547554	0.112739	0.637565	0.126202	0.68155	0.0669742	-0.240111	0.248051	0.288254
ANKRD55	0.864476	0.0707002	1.39238	0.0280871	-0.599019	1.6284	0.215359	0.0273662	-0.0687442	1.92818	0	-0.140562	-0.872441	-0.661492	-0.307506	-0.657323	-1.01263
ANKRD56	0.506169	-0.623243	-0.51382	-0.11684	-0.112592	1.21897	0.927352	0.692733	0.645013	1.49251	0.742793	-0.0650106	-0.211865	0	0.367791	-0.0070734	-0.334673
ANKRD57	0.13731	0.31749	0.327607	0.185892	-0.044878	0.295856	-0.0422926	0	0.0809526	-0.128075	-0.239621	-0.549337	0.808198	0.134116	-0.984829	-0.396232	-0.672201
ANKRD58	1.44648	-0.130679	0.513205	0.369975	0.198044	0.173166	-0.131008	-0.10913	0.304169	-0.610188	0	-0.0371532	-0.145627	-0.199291	-0.353477	0.132425	0.00322104
ANKRD6	-0.12126	0.7792	0.218907	0.344924	0.268596	-0.0340581	-0.450412	0	-0.14287	0.0522437	-0.0823612	0.367022	0.0203185	-0.458536	0.851967	-0.113838	-0.148755
ANKRD60	-0.26174	-0.602053	-0.478833	-0.138541	-0.0786586	0.406983	0.922864	0.68017	0.624169	0.675722	0.730155	2.90574	-0.20774	0	1.46659	-0.0311871	-0.301063
ANKRD62	-0.226822	0.0286591	-0.462618	-0.0943296	-0.053694	0.535643	0.950118	0.723687	0.659935	0.833117	0.769942	-0.0916622	-0.19877	0.0148864	0.356664	-0.0175078	-0.304312
ANKRD62P1-PARP4P3	-0.26709	-0.609829	-0.482926	-0.13947	-0.0856638	0.406812	1.39614	0.696897	0.618221	0.592622	0.729875	-0.087985	-0.171183	0.0240779	0.361705	0	-0.269852
ANKRD63	-0.693965	0.182318	0.442934	-0.0444589	0.0680485	-0.597346	-1.14343	0.0737376	-1.46491	-1.5171	-0.334394	-0.538438	0.432535	0.367642	4.07065	0.266155	0
ANKRD65	0.446646	0.826233	0.614763	-0.0957789	-0.453812	0.525978	-0.100631	-0.057672	0	-0.125094	0.218181	0.717622	-0.0838261	0.390575	0.894195	-0.387288	-2.43342
ANKRD7	-0.486901	-0.862513	-0.756494	-0.358442	-0.341445	0.235231	0.686858	0.468879	0.40191	0.558755	0.502192	-0.0268049	0	1.20289	2.66516	-0.306698	-0.624073
ANKRD9	-0.661005	-0.777075	-0.448624	-0.559454	0.0629177	-0.670371	0.377554	-0.467767	-0.0414448	0	1.51725	0.341813	0.402565	1.28633	-0.052062	0.485397	0.254571
ANKS1A	-0.207842	-0.0931454	0.194493	-0.160326	0.051595	-0.104716	-0.500283	-0.399505	-0.888081	-0.0252404	-0.352501	0.165852	0.138777	-0.228418	0.155229	0.422218	0.557595
ANKS1B	-0.654473	0.203537	-0.282315	0.519565	-0.743181	0.803969	0.236495	0.596786	1.02707	0.591391	-0.191781	0.0224147	-0.509674	-0.244837	-0.304964	0.145571	-0.811639
ANKS3	0.00225353	0.273326	0.05797	0.0904827	-0.411396	0.489777	-0.474683	-0.259297	0	-0.116072	-0.536865	-0.600114	-0.0210419	0.189023	0.012557	0.149946	-0.359841
ANKS4B	-0.149312	-0.506217	-0.385349	-0.00728559	0	0.625797	0.984403	0.76557	0.707716	1.04118	0.820878	-0.0940309	-0.213273	0.0154819	0.355769	-0.0254307	-0.322626
ANKS6	0.260728	0.684809	0.3693	0.282528	0	0.0387135	-0.304458	-0.238665	-0.0525618	-0.268096	-0.894017	-0.115904	0.0799856	-0.265168	0.190192	-0.0384436	0.0871172
ANKUB1	-0.22136	-0.558046	-0.435646	-0.0975962	-0.0462184	0.514071	0.938428	0.707209	0.644797	0.853285	0.762219	-0.0957479	-0.186136	0.0345759	0.349531	0	-0.286135
ANKZF1	0.174067	0.335127	-0.00582218	0.0535269	-0.0756168	0.0951891	0	-0.33293	0.00542116	-0.541971	-0.595784	-0.0868931	0.408829	-1.40104	0.215267	-0.685838	0.351852
ANLN	-0.144199	-0.53885	-1.08068	-0.621244	-0.652465	-0.0994458	0.306921	0.0836	0.479391	0.339557	0.140043	1.66774	-0.595348	-0.468514	5.6445	0.420296	0
ANO1	-0.841694	1.31172	0.0308306	0.258116	-0.729776	0.731722	-0.214393	-0.294131	0.464367	0.380132	-0.275957	-0.981892	-0.342545	-0.379538	-0.229069	0.309432	-0.0130165
ANO10	0.173334	-0.0727153	-0.0365562	0.0357914	0.086144	-0.211211	0.228858	-0.496302	-0.23315	0.132074	0.506653	-0.360102	0.0963268	0.110126	-0.0333605	-0.160392	-0.18992
ANO2	-0.157324	0.159225	-0.534031	-0.015655	-0.0797577	0.597673	0	0.287933	-0.0726628	1.18634	0.229498	-0.712062	0.625084	-0.754353	-1.14859	0.132706	0.690307
ANO3	-0.675777	-0.602232	1.55795	0.778398	-0.493693	0	0.523039	0.289024	0.2103	0.183855	0.321374	0.466553	-0.57921	-0.384321	-0.0471787	-0.408692	-0.678285
ANO4	-0.670074	-1.03687	-0.940148	-0.550685	-0.558639	0.192468	0.517636	0.285212	0.22828	0.185624	0.304459	0.127522	-0.582623	0.393064	0	-0.373051	-0.706765
ANO5	-0.492933	-0.414228	-0.731282	0.180495	0.185321	-0.36085	0.222802	0	0.107832	0.123236	0.0588446	0.35953	-0.00158787	-0.862848	-0.173984	-0.239237	0.576402
ANO6	-0.37532	-0.621007	0.0284252	0.0763142	-0.219401	0.114116	-0.00935507	-0.242849	-0.237303	0.0273356	0.0810761	-0.548264	-0.264503	0.0504356	-0.155444	0.591127	-0.0933452
ANO7	-0.368048	-0.162293	-0.153063	-0.764264	0.0732794	-0.334342	-0.290437	-0.559715	-0.970159	-0.0987994	-0.509185	0.0521379	0.39836	0.0110792	0.542216	0.603384	-0.178666
ANO8	0.425538	0.53901	0.397941	0.115143	0.608076	-3.31053	-3.69718	-2.70241	-3.26869	-3.14422	-3.40509	-0.633168	0.170934	-0.655727	0.321655	0	0.216568
ANO9	1.89157	1.27343	0.974705	0	-0.389886	1.58058	0.458768	0.723744	1.08729	0.165727	-0.668339	-0.223074	-1.51133	-1.71918	-0.813375	-1.25316	-0.850762
ANP32A	0.0731646	-0.276768	0.0770683	0.241181	0.120412	0.116752	0.162415	0.181181	0.111934	0.0822245	-0.115813	0.396933	-0.196226	-0.505111	-0.125631	-0.648979	-0.0358448
ANP32A-IT1	0.332541	0.855306	0.195783	0.42542	-0.0575476	-0.774624	-1.69727	-0.811694	-0.948931	-1.39193	-2.89815	-0.786943	0.13348	0.145296	0.109732	0.386816	0
ANP32B	0.129329	0.0973988	0.360226	0.31475	0.133968	-0.113484	-0.0249329	-0.391343	-0.205118	0.0572615	-0.47604	-0.386148	-0.0427008	0	0.054203	-0.413608	0.129486
ANP32C	0	0.166868	0.420082	0.686449	0.545278	-2.38991	-1.64061	-2.56683	-2.81733	-2.03439	-2.46555	0.365792	0.0849028	0.293059	-0.237961	-0.0456438	0.129672
ANP32D	-0.0766582	0.0107155	0.120925	0.424767	0.0331135	0.0221548	0.623076	-0.275004	-0.0893903	0	-0.108403	0.276067	-0.162003	-0.107222	-0.0413899	-0.549693	0.437073
ANP32E	0.0101665	0.033397	-0.0303248	0.363371	0.0862462	-0.452473	-0.0409671	-0.40821	0.00798766	-0.0293002	-0.425728	-0.0158408	-0.361479	0.14341	-0.685675	0.37299	0.00952466
ANPEP	1.10319	0.60027	1.29756	0.980225	0	2.20522	-0.400463	1.71822	2.13463	-0.0524755	0.448338	-1.79044	-0.889185	-0.807453	-1.87398	-1.80654	-1.78115
ANTXR1	0.0499434	0.614088	0.747523	0.315578	-0.29445	0.448101	-0.414748	-0.0930948	-0.0633879	0.141584	-1.07671	-0.119314	-0.0230467	0.116267	-0.144324	-0.00855565	-0.93
ANTXR2	0.0387616	0.0214465	-0.0321995	0.201556	0.0166392	0.153328	0.297341	0.222028	-0.0892622	0.794809	-1.03442	0.508153	-0.335684	-1.23902	-0.524992	-0.140812	0.215882
ANTXRL	0.206446	-0.619415	-1.10497	-0.729394	0.228093	-0.122125	0.28457	0.164485	0.00369405	0.193127	1.45527	0.575489	-0.941552	0.211394	-0.0215151	-0.272254	0.16093
ANXA1	0.531265	0.150231	0.231498	-0.14696	-0.252093	0.721182	-0.471259	-0.127241	0	0.757417	0.776608	-1.18315	-0.190196	0.878997	-1.23302	0.294763	-1.82274
ANXA10	-0.515307	0	-0.454149	-0.373085	-0.352831	0.190595	0.685905	1.61182	0.386949	0.693594	1.71263	-0.409651	-0.620275	-0.408726	-0.0281239	3.28641	1.97924
ANXA11	-0.624771	-0.397185	-0.409202	-0.148138	-0.403965	0.243671	0.835191	0.572403	0.282598	0.187086	0.521277	-0.0312489	-0.186408	-0.0555402	0.0592556	-0.187267	0.0399536
ANXA13	-0.649978	1.28057	-0.890498	0.037323	-0.512633	0.0660362	0.669767	0.340481	0.607964	0.316581	2.88311	-0.533544	-0.658755	-0.446898	0	-0.462906	-0.77272
ANXA2	0.766486	0.559255	0.981719	0.153974	0.371913	-2.18392	-2.67453	-2.80988	-2.66001	-1.92621	-2.22884	-1.21754	0.648235	1.52766	-0.248463	0.916033	-0.360455
ANXA2P1	-0.0533352	-0.177448	0.292773	-0.440089	-0.204731	1.00466	0.0573978	0.0490608	-0.552755	0	0.852138	-1.28312	0.30965	1.29293	-0.573831	0.804895	-0.662629
ANXA2P3	1.21953	1.11913	1.60415	0.864627	1.00107	-0.712614	-1.78595	-2.78809	-2.41125	-1.87811	-1.35482	-0.678853	0.970369	2.1049	0	1.45654	-0.249488
ANXA3	-0.61177	-0.197211	-0.570054	-0.889427	0.707845	-0.0522833	0.616974	-0.221407	-0.254125	0.612247	1.62302	0	0.667076	1.24632	-0.462602	1.27502	0.259897
ANXA4	-0.00702763	0	0.0642176	0.0356655	-0.520283	0.866608	0.552622	0.28274	0.256905	0.437644	0.477956	-0.862239	-0.980181	-1.12982	-0.600964	-1.27989	-0.430765
ANXA5	-0.324814	-0.501283	0.00454235	-0.281789	-0.268194	0.52781	-0.129774	0.124581	0.0594873	0.445062	0.876044	0.00345898	0.0190573	0	-0.758081	-0.104389	-0.699188
ANXA6	-0.138037	-0.316878	-0.40311	-0.216353	0.0153522	0.0181646	0.630447	0.246088	-0.00913811	-0.38141	0.650769	0.433143	0	-0.489311	0.548271	-0.729323	0.205457
ANXA7	-0.0747962	-0.208982	-0.18202	0.0826254	0.127283	-0.100717	0.342821	-0.217799	-0.159135	0.366273	0.575415	0.192763	0.120833	0.534492	-0.144719	-0.0596781	0.113323
ANXA8L2	1.59112	0.7613	0.123248	-1.81003	0	3.04668	1.68583	-1.29065	-0.823404	2.27826	0.403869	-1.22447	-1.03895	-0.111941	1.75308	-2.79627	-0.0381184
ANXA9	0.394881	0.581519	0	-0.809772	0.57206	-0.481897	0.115462	-0.0483499	-0.37895	-0.168869	-0.22128	0.123796	0.143495	0.0616283	1.3133	-0.411427	-0.112616
AOAH	2.99519	2.80152	2.19162	1.89718	0	2.17792	0.598422	2.15484	1.63278	-0.148691	-2.78714	-1.93461	-1.49684	-2.81095	-3.22608	-3.59974	-3.87711
AOC2	-0.172379	0.277028	0.54222	0.316592	-0.111317	-1.20498	-0.538152	-0.500316	-0.168211	0	-0.317341	-1.52849	0.331321	0.782114	0.477555	0.496149	0.73435
AOC3	0.339871	0.383659	0	-0.415782	-0.265933	0.522646	-0.743612	0.0523329	-0.0585327	0.407402	0.214968	-0.716284	0.209031	-0.516592	0.965473	-1.26009	-0.852374
AOC4	0.0692043	0.0985141	-0.966745	-0.467361	-0.848659	0.653109	-0.320807	-0.000357	0.766413	-0.753139	0	0.664127	0.437413	0.163217	1.76574	-0.265914	-1.43744
AOX1	0.833403	1.34907	1.34751	-1.23318	-1.90883	1.72652	-1.21228	0	-0.282018	-1.5631	-0.0960493	-1.18394	1.66829	-0.39524	1.88957	2.23582	-0.723248
AOX2P	-0.23919	-0.582797	-0.46162	-0.115333	-0.0585136	0.499853	0.927858	0.687582	0.641687	0.835166	0.74952	0.712735	-0.220443	0	0.330954	-0.0373259	-0.312449
AP1AR	-0.242621	-0.597271	-0.388354	-0.539865	0	0.438388	0.489915	0.631595	-0.212905	0.425557	0.705353	0.137941	0.642287	-0.478542	-0.381401	-0.335629	0.470918
AP1B1	0.10694	-0.239246	0.13976	0.075273	-0.0754442	0.276454	-0.00206709	0.0498004	0.170393	-0.0889444	0.700712	-0.511082	-0.245521	0.160917	-0.0563695	0.347563	-0.0914118
AP1G1	0.0613432	-0.0219269	-0.0908976	0.1161	-0.227683	-0.104998	0.0347996	0	0.227017	0.0294724	-0.413492	-0.187533	0.491753	0.154228	-0.219811	0.34342	-0.0129442
AP1G2	1.14595	0.640585	0.470947	-0.197243	-0.229284	1.12439	0.447987	0.962163	0.432541	-0.0311122	-0.134606	-0.239691	-0.136885	-0.489379	-0.255399	0	0.0317597
AP1M1	-0.0894089	-0.434993	-0.188749	-0.23164	-0.248901	0.18462	0.445001	-0.129539	-0.174497	0.12584	0.541273	0.0751324	0.160075	0.0877123	0.276247	-0.141201	0
AP1M2	-0.949505	0.520132	-0.828893	-0.0784116	-0.120074	-0.284335	1.35235	0	-0.0690975	0.0152349	0.038826	0.456836	0.472211	-0.694954	0.117866	-0.475489	1.17658
AP1S1	0.125788	-0.456288	-0.450569	-0.629246	-0.0603151	0.358242	0.499562	0.147783	0.353017	-0.506092	0.415408	0.0969968	0	-0.602109	0.0458841	-1.18422	-0.0180931
AP1S2	-0.290287	0.0948788	-0.470749	0.516981	-0.313237	-0.371461	-0.101523	0.109891	0.116006	-0.22813	0.159267	0.383859	0.544619	0.862316	-0.244347	0.742911	-0.156797
AP1S3	0.719567	0.525979	0.311467	0.604168	-0.423132	0.0570752	0.198078	0.571754	0.44896	-0.201338	-0.304459	-0.443947	-0.301029	-0.348502	-0.071262	0.00718308	-0.405985
AP2A1	-0.429759	-0.708519	-0.632827	-0.684164	-0.511653	0.522398	1.3728	0.927608	0.687033	0.988165	1.66035	0.235163	-0.334606	-0.243182	0	-0.163836	0.179071
AP2A2	-0.31903	-0.0654016	0.233181	-0.224473	-0.638843	-0.428494	0.0643163	-0.0367653	-0.157683	-0.0714242	0.419981	0.0537991	-0.0702405	-0.454258	0.253972	0.0490501	0.163404
AP2B1	0	-0.187842	0.0709639	-0.27021	-0.284417	0.180434	0.366789	0.246342	0.0814915	-0.112445	0.514116	0.362632	-0.229496	0.0802994	-0.0749016	-0.334	-0.270601
AP2M1	-0.332704	-0.413615	-0.18461	-0.0770779	0.105528	-0.44967	0.372034	-0.214275	0.156024	0.0497961	0.740992	0	-0.293016	0.16518	0.204073	0.175307	-0.00559425
AP2S1	0.0722685	-0.447957	-0.19237	-0.111444	0	-0.378486	0.215353	-0.141366	0.200732	-0.102659	0.733551	-0.535349	0.086379	0.25818	0.308479	0.17801	-0.407218
AP3B1	-0.0346937	-0.327864	-0.294958	0	-0.0651951	0.240418	0.440264	0.198341	0.324503	0.499606	0.795146	0.0648871	-0.102491	-0.0798569	-0.15106	0.169732	-0.125137
AP3B2	-0.141765	-0.45449	-0.164096	-0.50172	-0.482738	-0.035078	1.55716	0.37115	0.157136	0.342148	0.232471	-0.6617	-0.163715	0.515333	0.161711	0.609039	0
AP3D1	-0.504696	-0.519849	-0.379617	-0.307243	-0.134469	-0.117702	0.589698	-0.148726	-0.095067	0.117045	0.869679	0	0.124407	0.555932	0.137626	0.156927	0.363777
AP3M1	-0.312787	-0.518123	-0.589519	0.126871	-0.0931511	-0.347196	0.280408	0.178489	-0.00246239	0.650793	0.425268	0.230042	0.0441747	0.180633	-0.124664	-0.252913	0
AP3M2	-0.0647459	0.0662756	0.535724	0.759743	0.487576	0	0.283957	0.0345707	-0.0325079	0.215968	-0.626875	0.0774546	-0.620958	-0.642787	-0.445572	-1.15906	-0.468602
AP3S1	-0.219234	-0.106346	0.00765959	0.0403334	-0.220485	0.0797335	-0.08847	0.104597	-0.0853914	0.483309	0.271308	-0.164018	0.615219	0.353433	-0.165158	-0.0679679	-0.125652
AP3S2	-0.676458	-0.964844	-0.59987	-0.333706	0.0107203	-0.0217104	0.46428	0.166283	0.032486	0.651587	1.0276	0.412578	-0.217244	0	0.338414	-0.160902	-0.0289717
AP4B1	-0.0216539	0.258745	0.0871427	-0.276223	-0.0313497	0.446072	0.510185	0.293448	0.252073	0.0622485	-0.037678	0.0557563	-0.0133741	-0.350865	-0.283581	-0.704696	-0.685385
AP4E1	0	-0.27621	-0.318789	0.100336	-0.218351	-0.149423	0.10268	0.0499001	-0.000411	0.50842	0.0108519	-0.405432	0.166261	-0.0731125	-0.420687	0.303723	0.079299
AP4M1	-0.493238	-0.222933	-0.251371	-0.406369	-0.162393	0.546233	0.0765417	0.143051	-0.0812442	0.189616	0.393325	-0.0180938	-0.485236	0.158394	0.267287	-0.163175	0.321254
AP4S1	-0.149704	-0.0865462	0.0266442	0.377223	0.0962911	-0.396422	0.328184	-0.232978	-0.444225	-0.178377	0.384364	0.564192	-0.295671	0.196741	0.48582	-0.408873	0.386632
APAF1	1.42159	1.37948	0.561332	0.868062	0.35964	0.465566	0	-0.119633	-0.0553627	-0.540555	-1.46606	-0.690752	0.818488	0.044714	-0.760136	-0.257016	-0.926225
APBA1	0.268351	0.110017	-0.0778019	0.279639	0.469985	-0.495006	-0.0948329	0.276854	-0.57399	-0.334259	-0.659579	0.599288	0.073771	-0.275026	1.06297	-0.463971	-0.327665
APBA2	1.0823	3.00933	2.90733	1.04278	-0.386031	3.03665	0.040405	2.83763	0.0402844	0.0902734	-0.68626	-1.57199	-1.69851	-1.18368	-0.756859	-1.29912	-0.735047
APBA3	0.135016	-0.0363998	-0.224801	0.00613689	-0.0710711	0.0410762	0	-0.117306	-0.0515761	-0.347243	0.365835	-0.123275	0.552027	-0.305368	0.353041	0.629183	0.431646
APBB1	-0.844835	-1.11425	-0.584888	-0.809367	-0.278971	0.0868235	0.602634	0.0972433	-0.148553	-0.469111	0.891399	0	0.235883	-0.165802	0.938923	0.139566	0.647038
APBB1IP	2.57807	1.72063	1.83122	1.29275	0.471824	1.74816	-0.148615	1.52305	1.49197	-0.0464458	-0.587265	-1.69995	-1.48861	-1.12614	-0.312414	-0.836944	-2.24889
APBB2	-0.190235	0.162465	0.142841	0.169422	-0.114126	-0.20107	-0.235289	0.0345163	-0.395038	-0.157433	-0.388843	0.111384	-0.506616	-0.177569	0.917699	0.0107415	0.222605
APBB3	0	0.0817888	0.147355	0.122231	-0.206044	0.419592	0.825918	0.74969	0.662191	0.351466	-0.361764	0.720183	-1.33761	-0.580942	-0.594921	-1.75678	-0.515947
APC	-0.0695777	-0.334665	-0.0543656	0.031893	0.194853	0.392714	0.689965	0.24153	0.341152	0.837002	-0.928928	0.683274	-0.683479	-0.153785	-0.135537	-0.501064	0.226645
APC2	-0.300546	0	-0.321641	-0.161645	-1.60841	0.793356	0.251656	0.0871644	-0.118328	0.628823	1.06004	0.30038	-0.835865	0.2134	1.61759	-0.11117	-0.660179
APCDD1	-0.0956917	-0.0620556	0.628516	0.202621	0	1.1414	0.36536	0.172402	0.946859	0.969765	-0.0788603	0.517633	-1.74896	-0.792402	-0.546673	-1.3326	-0.195831
APCDD1L	-1.44517	2.01422	2.2036	1.65695	0	2.43467	-2.11411	0.105864	0.880692	0.76611	-2.2789	1.44627	-3.34666	-2.17238	-2.75431	-3.16002	-1.59267
APCS	0.218787	-0.105206	-0.0584607	0	0.446532	1.90353	0.710153	-0.324248	-0.867235	-1.25519	-0.272516	0.658981	0.0260591	0.417658	0.0305648	-0.0132985	-0.0574393
APEH	-0.506598	-0.39895	-0.430416	-0.606835	0.213571	-0.00367546	0.892973	0.277084	-0.0903492	-0.0888233	1.01162	0.307337	0	-0.164755	0.55168	0.14265	0.727849
APEX1	-0.427595	-0.387311	-0.495606	-0.409869	-0.154665	0.181487	0.582023	0.131227	0.0357752	-0.189228	1.04815	0.182878	-0.17095	0.644455	0	0.28404	-0.0584211
APEX2	-0.295771	-0.644068	-0.296666	-0.280041	-0.159321	0.234316	0.541288	0.168941	0.665226	0.528118	1.19989	0	-0.295311	0.00108814	0.0506048	-0.349152	-0.186586
APH1A	-0.287212	-0.34664	0.261818	-0.368333	0.0110457	-0.143534	-0.0154922	0.0521424	0.138579	0.00860357	1.10498	-0.153385	0.0972569	0.812677	-0.0911722	-0.0769539	-0.144835
APH1B	0.181947	-0.0148449	0.433493	-0.0805654	-0.456656	0.446304	0.275126	0.290761	0.33901	0.0421734	0.451359	-0.628953	-0.62255	-0.250006	0	-0.355534	-0.572494
API5	-0.0791597	-0.295974	-0.29506	0.0340652	-0.235738	0.333504	0.620776	0.43289	0.375961	0.810404	0.574764	0.754668	-0.124177	-0.210814	-0.461901	-0.190598	-0.258716
APIP	-0.478885	-0.390847	-0.269545	-0.492511	0.312032	-0.30687	0.168169	-0.359922	-0.29473	0	0.314702	0.639135	0.0699387	0.348105	-0.101061	0.14067	0.0557613
APITD1	-0.55667	-0.121894	0.0649929	0.168934	0.245914	0.101264	0.0934553	-0.391831	0	0.390719	-0.166463	-0.395884	-0.0674467	-0.39189	0.111025	-0.106444	0.133693
APLF	-0.124267	-0.470907	-0.367125	0.0205917	-0.00655413	0.472772	1.03512	0.838969	0.734122	0.704119	0.834752	-0.0767174	-0.206813	0	0.395632	-0.0191765	-0.0188198
APLN	-0.706955	-0.0760546	-0.427132	0.0987434	1.35043	-1.44974	0.105263	-0.765206	0.336867	0.0732784	2.98293	-0.582149	0	1.47145	-0.43164	-2.97381	0.55798
APLNR	0	0.33457	-1.00824	-0.303411	1.3541	0.271276	-0.360394	0.794121	0.939518	-0.38048	0.929977	1.05123	0.022243	-0.158299	-0.81248	-1.22748	-0.275908
APLP1	-0.304198	-1.02592	-0.0280271	0.196793	-0.81272	1.05925	0.98887	0.347169	-0.477251	1.19281	0.0505514	0.126953	-0.59491	-0.800734	0.10334	-0.730601	0
APLP2	-0.217261	-0.845367	-0.398002	-0.473145	-0.296024	0	0.551317	0.16402	0.154111	0.674555	0.389251	0.135682	-0.183769	-0.273065	0.133612	-0.413876	0.110646
APOA1	-0.0814347	0.565499	0.0570874	0.938077	-0.190114	2.11144	2.37207	1.41508	-0.00204134	1.0671	-0.7358	-0.566955	-2.14098	0.0440593	-4.47288	-1.63716	-0.541626
APOA1BP	-0.515952	-0.895149	-0.744917	-0.581446	-0.864077	-0.340878	0.279229	-0.225398	0.0217533	0.088202	0.932063	0.210005	-0.290782	0.318324	0.231936	0.00344657	0.579921
APOA2	-0.258546	-0.613348	-0.296749	-0.1278	-0.121253	0.858601	1.96524	0.711554	0.642149	1.65376	0.727551	-0.0783896	0.245667	-0.00100946	0.368772	0	-0.335359
APOA4	-0.76454	-1.11585	-0.440793	-0.640241	-0.195193	0.529743	1.01558	0.471368	0.794627	0.278162	0.205064	-0.581866	-0.693048	0	-0.131163	1.52797	1.38133
APOA5	-0.793516	-0.361561	-0.37662	0.756433	-0.44557	0	0.386948	0.204431	0.0930786	0.144288	0.149602	0.208295	0.382809	-0.410426	-0.18541	-0.367686	-0.158608
APOB	0.982626	-0.18709	-0.814844	-0.294328	0.935397	0.499046	0.0882781	-0.226696	-0.410456	0.442353	-0.314799	0.758069	-0.247103	1.07146	0.259259	0.15958	-0.0228608
APOBEC1	-0.17123	-0.515992	-0.40388	-0.039916	-0.0045104	0.568131	1.00805	0.782618	0.713331	0.839303	2.30728	-0.0825591	-0.190598	0.0271187	0.367003	0	-0.287485
APOBEC2	-0.72265	-1.06172	-0.865423	-0.444603	0.331202	-0.34012	0.292595	-0.0485582	-0.423741	0.249979	1.20142	0	0.915583	1.14942	-0.474076	1.00687	1.10809
APOBEC3A	4.66128	1.28418	2.60218	4.95801	0	1.04166	-1.02273	1.25515	2.89059	-1.10364	-0.725281	-2.07842	-0.778386	0.899576	-1.6414	-2.00599	-1.09346
APOBEC3B	2.01419	-0.356343	0.623485	2.11598	-0.00835085	0.348547	-1.02811	0.32554	0.940511	-0.676286	0	-0.447313	-0.740484	-0.148729	1.54865	-0.690747	0.0467405
APOBEC3C	0.602652	-0.0353956	0.0434599	-0.0153589	0.202956	-0.264552	0	0.0511913	0.128814	-0.254023	0.319976	0.195907	-0.779401	-0.999925	0.435606	-0.970188	-0.32575
APOBEC3D	1.04541	1.09872	0.36345	1.01771	0.00997639	0.975946	0.332844	0	1.70554	-0.0468512	-1.84267	-0.32477	-0.333536	-0.586484	-2.20561	-1.80196	-1.04022
APOBEC3F	0.690351	0.0639339	0.385467	0.212098	0.0368419	-0.0623064	-0.0529304	-0.0844746	0.167602	-0.00566172	-0.23725	0.248786	-0.83265	-1.06357	0.76302	-1.10863	-0.331097
APOBEC3G	2.32279	1.393	1.19679	1.18616	0.319293	1.08461	-0.936828	0.506446	0.777061	-0.661088	-0.729884	-0.927759	-1.11902	-0.496984	0	-0.792074	-1.81425
APOBEC3H	2.46924	1.66925	1.57107	1.51364	0.289367	1.39682	-0.171668	0.491793	0.590159	0	-0.572262	-2.24293	-3.04924	-1.76947	-0.205763	-2.8571	-2.79609
APOBEC4	-0.774941	-0.322556	-0.992959	-0.650169	-0.597197	0	0.380675	0.790434	0.0945163	0.368325	0.811537	-0.661624	0.82564	-0.529574	0.139647	0.474911	-0.85433
APOBR	1.34617	1.0919	1.06464	0.789567	-0.0638614	0.952469	-0.932443	0.728486	0.900128	-0.334332	0.699461	-2.90399	-1.7225	-0.580694	-3.64465	0	-2.543
APOC1	2.92745	1.42035	1.14892	1.85586	-1.76224	-0.211278	-0.84611	1.62992	1.23922	-2.71667	-1.03919	-0.904188	-1.52053	0.134175	1.04647	0	-0.456521
APOC2	-0.311135	-0.452015	-0.902642	1.41232	-0.854311	0.871566	0.607275	0	0.54152	-0.0958791	-0.0174351	-0.779616	1.57217	2.35395	-0.055006	1.44508	0.0311775
APOC3	-0.156511	-0.50538	-0.386735	-0.0208139	0	0.559818	5.23424	0.788669	0.720098	0.821278	0.929748	-0.106965	-0.220764	0.431401	0.352626	-0.0354528	-0.319867
APOC4	-0.181966	-0.415364	-0.280588	-0.0422521	0.112014	-0.396198	-0.412819	-0.184856	0.111893	-0.176576	0	0.539512	0.0658936	0.865889	0.109439	0.949077	0.189351
APOD	-1.47602	0	-2.15146	-2.33825	-1.56427	0.237713	0.349137	0.828887	-2.16956	0.184031	0.794113	-0.762196	-0.535506	1.8875	-0.936929	0.967753	0.304177
APOE	1.38985	0.45672	0	1.31101	-2.42286	-0.736145	-1.96392	0.560487	0.352242	-1.2951	0.279282	-0.607594	-1.02612	-0.202787	0.355068	0.329446	-0.340842
APOF	-0.16022	-0.524424	-0.415404	0.459899	-0.0444894	3.75814	1.01325	0.804557	0.724166	0.925515	0.82699	-0.0538135	-0.188916	0	0.395715	-0.00138378	-0.298009
APOH	0.319194	-0.969712	-0.376914	-0.474092	-0.439249	0.405447	1.50809	0.338427	0.26584	0.538366	0.382532	-0.464289	0	0.0592885	-0.0159569	-0.391024	-0.679551
APOL1	1.08911	-0.203363	0.524026	0.371155	-0.180688	-0.132319	-0.460882	0.258191	0.720732	-1.15394	0.106581	-0.559299	0.0101919	0	-1.76442	0.608978	-0.509234
APOL2	0.804358	-0.326048	0.0292349	0.498774	-0.539799	-0.166204	-0.661818	0	1.06204	-0.445158	0.309383	-0.464266	0.369792	0.0224791	-1.43661	0.305629	-0.916695
APOL3	0.565281	0.171649	0.196282	0.163108	-0.380543	0.122855	-1.00185	0	0.127172	-0.651191	-1.27961	-0.303152	-0.853365	0.0529728	-2.08475	0.567801	-0.70241
APOL4	0.745386	0.19814	0.278587	0.61615	-0.692256	0.475949	-0.900679	0.378735	0.633198	-0.839581	-1.25436	0.280714	-0.339093	-0.238423	-1.73442	0.621507	-0.950877
APOL5	0.133084	0.631549	0.0370507	-0.428956	0.2891	-0.317171	-0.129158	-0.086915	0.722902	-1.23204	0.157726	-0.688876	0	0.653691	0.559816	-0.296519	-0.750705
APOL6	1.60835	0.759319	1.00722	1.03485	-0.0865428	0.277472	-0.0915473	0.134498	1.29531	-1.20757	-0.725862	-0.41718	-0.557499	-0.808609	-1.05447	0.0960023	-0.810248
APOLD1	-0.31935	0.42539	0.227804	-0.18587	0.358266	-0.463819	1.19119	0.655344	0.803945	-0.446746	-0.972176	0.725345	0.135676	0.629919	-0.217238	-0.541033	-0.449504
APOM	-0.586576	-0.689332	-0.78122	-0.709256	-0.135843	-0.16766	0.648515	0.29077	0.167156	0.658015	1.12381	0.188743	-0.93159	0.840926	-0.439165	0.0945888	-0.031117
APOO	-0.478363	-0.74445	-0.874884	-0.271876	0.350809	-0.730382	0.363682	-0.232824	-0.0625868	0.310835	0.710331	-0.134738	0.0555277	0.123931	0	0.476689	0.606916
APOOL	-0.522464	-0.686059	-0.773104	-0.233412	0.602603	-0.268708	0.208496	0	-0.0895453	0.413433	0.510057	0.262291	-0.358874	0.00550365	-0.19207	0.45535	0.115676
APOPT1	-0.53233	-0.538448	-0.353344	-0.267362	0.0353603	-0.235489	0.660153	-0.0338202	-0.176045	0.415164	0.459927	0	0.420648	-0.0561457	0.196158	0.150296	0.4197
APP	-0.233571	-0.209158	0.103546	0.357506	-0.024117	-0.764678	-0.339384	-0.308603	-0.0227432	0.524715	-0.365363	-0.131061	0.352353	0.165139	-0.0418415	0.140263	0.217863
APPBP2	0.0716105	-0.295233	0.104507	-0.124096	-0.0913096	0.00835228	0.25717	0.207152	-0.252652	0.246573	0.294513	-0.069458	-0.224599	0.0984383	0	-0.463941	-0.0832624
APPL1	-0.44071	-0.165318	-0.327713	0.198568	0.513403	0	0.625106	0.0105934	0.402218	0.275846	0.53655	-0.0910034	-0.441561	-0.689456	-0.596484	-0.173543	0.0239172
APPL2	-0.566828	-0.137165	-0.359707	0	-0.246757	0.525044	0.27901	0.796512	0.318473	0.053196	0.00294828	0.0996342	0.0407834	-1.355	-0.489011	-0.69915	-0.485588
APRT	-0.301884	-0.108088	0.0148172	-0.712935	-0.142988	0.371795	-0.429287	0.227164	-0.529244	0.207417	1.15987	-0.190379	0	0.712782	0.457259	0.167332	-0.377785
APTX	-0.0951435	-0.0942585	0.0044597	0.0989722	-0.187946	-0.0696847	0.211836	-0.00553624	0.115833	0.047019	0.0700552	0.160189	0.0255176	0.271771	0.0883304	-0.366206	-0.300903
AQP1	-1.07035	0.309603	0.220407	-0.459991	0.288295	-0.177296	-0.514288	0.433875	-0.0247931	-1.58833	0.520975	0.321263	-0.494671	0.00421285	-0.0621943	0.0704384	-0.000130178
AQP10	0.868856	0	1.12047	0.735116	-0.629966	1.87406	0.674639	1.33836	-0.0988221	2.41162	-0.744072	0.439785	-1.38257	-1.91199	-0.879587	-1.54144	-0.821107
AQP11	-0.424029	0.171229	-0.0660296	-0.52861	0.258211	0.134231	0.541764	-0.41494	-0.23936	-0.0903482	0.0967503	0.34311	-0.149957	-1.08718	1.00837	0	0.489952
AQP12A	-0.517363	1.70047	-0.774804	-0.381445	0.137803	0.206467	0.676173	0.460085	0.381405	0.403736	0.460688	-0.454533	-0.579125	-0.366989	0	-0.382031	-0.67961
AQP2	-0.886935	-0.985354	-0.0452523	-0.0418329	-0.682966	-0.134314	0.29789	0.084208	0	0.114697	0.109462	-0.15147	0.910017	0.0604272	1.97272	0.0408111	-0.902314
AQP3	-0.259873	0.523639	-1.33383	0	0.428579	-0.440773	-1.06061	0.838386	-0.64671	-2.14838	2.4934	-1.21877	-1.37719	1.29897	0.525049	1.36458	0.37066
AQP4	0.462495	-2.18988	-2.65252	-2.52321	-0.244103	0.441166	0.364835	-0.565277	-0.912349	1.00769	-0.495617	-0.719097	0.391079	0.0263579	2.19755	-0.675226	1.95212
AQP5	0	-0.233374	0.136555	-0.0192676	0.546238	-1.72976	-0.925392	-1.35089	-1.28593	-1.07165	-0.517348	0.387978	0.279871	0.328884	1.0475	0.91806	0.403121
AQP6	-0.379234	-0.778623	-0.673398	0.324869	-0.273696	0.335717	0.740286	0.519596	0.448193	0.6349	0.525805	-0.384901	0.296782	0.457915	1.16526	-0.313539	-0.437333
AQP7	-1.38632	-0.814996	-0.901627	-1.07019	0.315948	-0.602894	-0.00634289	0.0519247	-1.11535	0.0438986	0	-0.09515	0.173224	0.266708	1.54004	0.136364	1.25863
AQP7P1	-0.739113	-0.182248	-0.592577	-0.492777	0.536322	0.161868	0.763667	0.703073	-0.32599	0.451053	-0.116469	0.00903575	-0.581064	-0.406674	1.33748	-0.329835	1.04419
AQP7P3	-1.68095	-0.819951	-1.01808	-0.851952	0.394866	-0.398616	-0.679331	0.152687	-1.49257	0.717588	0.120187	-0.920388	0	0.153112	1.60972	0.087491	0.58987
AQP8	0	-0.489442	0.0262623	0.112644	0.213488	-1.13403	-1.26152	-1.46082	-1.55895	-1.27169	-1.46608	0.441079	0.044251	-0.329309	0.333043	0.121054	0.0620847
AQP9	1.01087	-0.00402355	0.00244236	3.16471	-1.90328	0.633999	-0.728377	0	1.31404	-0.890635	-0.886547	-3.04723	1.28259	0.934688	-2.52161	-0.515263	0.145526
AQPEP	1.97277	0.121183	0.289025	-0.770883	-1.20061	-0.0420084	0.275725	0.420795	-0.555297	0.347764	-0.478637	-0.586959	0.139359	-0.599104	1.67452	-0.280694	-0.479056
AQR	0.0820069	0.0498235	-0.0548556	0.212036	-0.0443149	0.00198293	-0.426171	-0.0321703	-0.403901	-0.104058	-0.447905	-0.36627	0.008353	-0.0553379	-0.144272	-0.0309086	-0.0230927
AR	-0.0932541	-0.633826	-0.046361	-0.389228	0.0697517	-0.801353	0.0896826	0.244713	-1.02046	1.14815	-0.480975	0.571944	0.374332	0.436833	-0.331161	0	0.886494
ARAF	-0.732778	-0.469407	-0.389604	-0.253308	-0.102895	-0.32437	0.685737	0.263563	0.167193	-0.0674782	1.09963	0.101231	-0.483671	0.0560036	-0.0298905	0.224155	0.276893
ARAF2P	-0.125176	-0.628884	-0.119035	-0.0758362	0.269925	-1.34266	0.0331755	-0.559848	-0.408727	-0.589428	0.448583	0.412911	0.156012	0.316639	0.0827112	0.324266	0
ARAP1	-0.191929	-0.0905216	0.127834	-0.0809836	0.0437849	0.493539	-0.291497	-0.0186086	0.182074	0.0429811	-0.0889246	0.293149	0.152474	-0.449608	0.143255	0.0825992	-0.841512
ARAP2	2.04524	1.59712	0.940529	1.14528	-0.102929	1.40671	0.441431	1.05759	1.02641	-0.00666905	-0.41766	-1.84491	-0.6935	-1.62163	-2.87833	0	-1.79398
ARAP3	-0.512271	-0.0621061	-0.156651	-0.20492	0.239692	0.402436	-0.198584	0.139818	0.136066	0	-0.113438	-0.287378	0.432484	0.357794	-0.833778	0.612726	0.126838
ARC	-0.788263	-0.507572	-1.04109	-0.645938	-0.625371	-0.0845666	0.410304	0.191314	0.114017	0.0443988	0.196974	-0.771685	0	1.20853	0.97945	0.883493	-0.971532
ARCN1	-0.438522	-0.465652	-0.298679	0.0265083	-0.29937	-0.0315971	0.518825	0.121755	0.168591	0.354378	0.114459	0.109996	0.247316	-0.06529	-0.458738	0.256418	-0.049305
AREG	-1.63636	1.53121	-0.0839844	-2.17955	-2.53105	0.0238214	0.184775	-0.0617578	-1.63104	-0.707126	-1.28432	0.0710087	5.10511	5.06702	-0.0583799	2.63691	2.40144
ARF1	-0.509695	-0.52023	-0.201237	-0.147099	-0.0822773	0.191863	0.992633	0.18462	-0.0766134	0	0.692179	0.134352	-0.012208	0.35578	-0.0438185	0.300364	0.159661
ARF3	0.289635	0.705018	0	0.0489643	-0.731323	0.640163	-0.55674	0.228908	0.226618	-0.820726	0.0605934	-0.551904	0.594149	0.0782619	-0.420752	0.0512273	-0.617318
ARF4	-0.236912	0.0883284	0.0510702	0.323721	0	-0.309453	-0.294567	-0.441622	-0.420695	0.0367107	0.387004	-0.537485	0.607582	0.627536	-0.470263	0.642485	-0.131968
ARF5	0.243381	-0.139608	0.0467119	0.151735	0.0761099	-0.444613	0	-0.16976	-0.20412	-0.0637026	0.140354	-0.49232	-0.215568	0.711381	0.0417824	0.180014	-0.172611
ARF6	0.455442	0.378166	0.460843	0.0575681	-0.0618744	0.287215	-0.185165	-0.185917	-0.0195246	-0.31746	0	-0.263056	0.788052	0.0175204	-0.780274	0.00730896	-0.083931
ARFGAP1	-0.0360355	0.0206881	-0.0540352	-0.178417	-0.272956	0.333452	0.440104	0.473923	0.888434	0.375838	0.390692	-0.133861	-0.0867653	0.300153	-0.41848	0	-0.585287
ARFGAP2	0.107929	-0.12458	0	-0.134931	0.0296993	-0.301076	-0.0339174	-0.49314	-0.144935	0.0186424	-0.177395	0.212228	0.0673809	0.013052	0.192027	-0.0504761	0.0178471
ARFGAP3	-0.176795	-0.188035	-0.348496	0	-0.284875	0.0399618	0.0188084	-0.327813	0.205146	-0.071023	0.785878	-0.61827	1.0315	0.923468	-0.294915	0.828744	0.0298052
ARFGEF1	0.083133	0.120857	-0.30978	-0.160729	0.538769	0.494185	-0.0531464	-0.0877051	0.0266948	-0.133302	-0.270277	0.0568633	0.385593	-0.291302	0.449659	0.863582	-0.101293
ARFGEF2	-0.345939	-0.24854	-0.297195	0.0460558	-0.0447941	-0.26477	0.124921	-0.134454	0	0.279666	0.254296	0.319221	0.389229	-0.178238	-0.00364876	0.113197	0.573587
ARFIP1	0.956092	0.563052	0.410763	0.729336	0.427252	-0.145921	-0.292481	-0.658599	-0.131193	-0.456087	-0.523568	0.0076344	-0.11372	0.271048	0.0275524	0.0379734	-0.0493035
ARFIP2	-0.642602	-0.77735	-0.719954	-0.708068	-0.718865	0.105163	0.254831	0.136227	0.369623	0.206636	1.13022	-0.233778	0	0.0162554	-0.206403	0.161266	-0.263569
ARFRP1	-0.332165	-0.333423	-0.118052	-0.0651963	0.0308915	-0.486039	0.428104	0.0966555	0.0631252	0.138572	0.701002	0.267712	-0.0540208	-0.0604837	0.00843882	-0.359041	-0.0408562
ARG1	0.98999	-0.483241	0.577985	-0.648545	-0.651861	1.40074	0.714688	0.291981	0.741164	0.217251	0.982823	-0.661357	-0.411432	-0.214638	-0.213674	-0.61293	-0.580748
ARG2	-1.77791	-1.782	-0.302548	0.019763	-0.614494	0	0.660031	0.322718	-0.249039	1.10308	1.13419	-0.894905	1.56821	0.522809	-0.675892	1.74494	-0.0582514
ARGFX	0	0.720447	0.308885	0.119169	-0.287626	-0.0898643	-0.896132	-1.1571	-1.25655	-0.628816	-1.47582	0.583974	0.375243	-0.38961	0.786133	0.904715	1.14981
ARGFXP2	0.263003	0.59738	0.0695333	-0.3533	-0.0337286	0.902549	-0.393516	-0.17475	0.393991	-0.191697	-1.71043	-2.24373	0.893809	-0.282259	0.21384	0	1.10497
ARGLU1	0.0541	0.635395	0.412836	0.491271	-0.0171599	-0.141405	1.055	0.0799677	0.489555	0.0270703	-1.23528	0.580349	-0.289665	-0.474789	-0.594152	-0.492053	-0.72769
ARHGAP1	-0.0915136	-0.235569	0.00726032	0	-0.00296783	0.0507946	-0.224499	0.167054	0.592244	-0.223693	0.66902	0.264981	-0.607938	-0.224491	0.00319767	-0.76719	0.021059
ARHGAP10	-0.237518	-0.238406	0	-0.243301	-0.0477152	-0.0366907	0.717367	0.315681	0.134906	0.377274	0.155169	0.326733	-0.213585	-0.659147	0.0700998	-0.677206	0.487287
ARHGAP11A	-0.165315	-0.706454	-0.365182	0.274605	-0.506709	0.738303	0.49151	0.283483	0.19642	0.794106	0.315773	-0.607846	-0.567212	-0.516771	-0.139858	-0.362236	-0.280948
ARHGAP11B	1.29693	1.25105	0.852435	0.535076	-0.880409	0.162692	-0.926467	0.53551	0.475239	0	-1.22355	-0.192184	1.74559	-1.5495	-0.293356	-0.0716448	-0.866105
ARHGAP12	0.380101	0	-0.275872	0.26895	0.378271	-0.023221	0.0679922	-0.206306	-0.217784	-0.406671	-0.189101	-0.251299	0.253997	-0.507302	0.239834	0.1371	0.328125
ARHGAP15	1.96897	1.64677	0.821875	1.04488	0.346835	1.02551	-0.322349	0.60727	0	0.441154	-0.764239	-0.948561	-0.528369	-0.633786	-0.199617	-0.858247	-0.587536
ARHGAP17	-0.543993	-0.00444175	-0.434014	-0.782966	-0.190173	-0.125188	-0.125302	0.357684	-0.447775	-0.389932	-0.919924	0.22805	-0.0432324	-0.148488	-0.271735	0.183862	0.316422
ARHGAP18	1.33325	0.910181	1.15185	0.656825	0.660376	0.994813	-0.333565	0.279417	0.203213	-0.684824	-0.0938358	0	-0.523913	-0.113944	-0.698298	-0.0152416	-0.227578
ARHGAP19	0.277656	0.0235906	-0.0602357	0.0531524	0.165012	0.0903063	-0.0758459	0.11234	0.179364	0.390167	-1.16351	0.472747	-0.34097	-0.84643	-0.141787	-0.677495	-0.445615
ARHGAP20	1.43908	0.323505	0	-1.19646	-0.0311775	-1.19797	-1.05576	-1.28607	0.154227	-1.23105	0.414897	0.0417805	0.559918	-0.0738325	0.553473	0.5797	-0.980299
ARHGAP21	-0.20875	0.295646	0.0521636	0.254922	-0.279675	1.04758	0.362438	0.784208	-0.200548	0.218941	-0.827942	0.380947	-0.135133	-0.0319761	-0.485547	-0.50644	-0.186004
ARHGAP22	-0.213464	0.853918	0.69632	0.0107517	-0.149487	0.980351	-0.509127	0.183617	0.702241	0.132477	0.231553	-0.164907	-1.56955	-0.187758	-0.766036	0	-1.03029
ARHGAP23	-0.614798	-0.56589	-0.23881	0.135354	-0.176204	-1.39777	0.337534	-0.142281	0.473011	0.827346	0.278074	0.359212	-0.140605	1.15227	0.761299	1.35975	-0.116246
ARHGAP24	-0.224631	-0.230211	-0.326225	0.174164	-0.826748	0.395652	0.499002	0.528266	0.116007	0.525433	-2.48267	0.248144	-1.31758	-1.31126	1.06451	-0.93873	0.369349
ARHGAP25	1.50564	1.01044	0.530563	0.572342	0.0464601	0.891132	-0.302362	0.340305	0.84828	0	-0.723193	-0.479575	-1.03625	-0.50424	-2.25804	-0.843838	-0.786724
ARHGAP26	0.358032	0.718083	0.280569	-0.286342	0.402788	-0.481496	-0.160661	0.0185106	0.0261624	-0.0800731	-0.368712	1.16846	-0.198575	0.0839505	0.105721	-0.893411	-0.296481
ARHGAP27	0.425031	0.010761	0.296581	-0.273572	-0.22664	-0.00645161	-0.293177	0.109804	0.525572	-0.16977	0.218129	-0.171419	0.00801897	0.367094	-0.373278	-0.328502	-0.67552
ARHGAP28	0.73468	0.112421	0.127759	0.36075	0.822489	-0.718792	-0.341104	-0.340074	-0.300533	-0.143094	1.91092	1.16337	0.602467	-0.288474	0.293028	-0.547702	-0.738738
ARHGAP29	0.0687754	-0.502513	-0.311845	-0.366122	0.0866971	-0.103429	-0.17994	0.325491	0.00802159	0.310474	-0.508374	-0.388276	0.301554	0.485375	-0.568666	0.701547	-0.0320883
ARHGAP30	1.92363	1.22375	1.1866	0.903865	0.142164	1.36887	-0.120359	1.16028	1.37728	-0.473525	-0.440344	-1.92127	-1.13383	-0.808785	-2.84965	-0.65915	-2.34639
ARHGAP31	-0.341158	-0.88166	-0.587466	-0.716072	-0.505572	-0.0760651	0.494185	0	-0.0244226	0.548655	0.365345	0.0142183	0.669639	0.384999	-0.841863	0.304434	0.11842
ARHGAP32	-0.458951	0.0673711	0.231517	-0.37598	-0.0494959	-0.470649	-0.107259	-0.633524	-0.825706	-0.510026	-1.01696	0.264032	-0.025192	-0.399371	0.835381	0.57851	0.221839
ARHGAP33	-0.166178	0.133074	0.215339	-0.336601	-0.316532	-0.116938	-0.00278027	0.576843	0.166989	0.0583595	0.251526	-0.421716	-0.754293	-0.277019	-0.223972	-0.768548	-0.375855
ARHGAP35	-0.899076	-0.644295	-0.349241	-0.757052	-0.440118	0.0418036	0.683676	-0.150235	0.0819616	0.520565	0.478138	-0.154639	0.335356	-0.449075	-0.0188885	0.0832727	0.325863
ARHGAP36	-0.214379	-0.567562	-0.448014	-0.0869989	-0.0403314	0.626897	0.931503	0.699452	0.659408	1.04272	0.770889	0.308557	-0.23492	0	0.53017	-0.0441122	-0.329932
ARHGAP39	0	-0.0361752	-0.158401	0.123401	0.0329418	-0.0909624	-0.211916	-0.615007	0.0579176	-0.102087	0.0182571	-0.14319	0.0035634	0.444781	0.0524249	0.511846	-0.046669
ARHGAP4	0.788116	0.162691	0.263772	0.169346	0.0586829	-0.124868	0.271953	-0.0894628	0.521294	-0.284827	0.217997	-0.316503	-0.123298	0.0257478	-0.104889	0.177083	-0.490743
ARHGAP40	-0.380016	-0.204751	0.111984	0.473902	0.907765	-0.984077	-0.0969222	-1.95484	-1.53476	-0.715389	-1.79695	0.277294	0.0978794	0.426134	0.0407679	0.190942	0.639787
ARHGAP42	-0.198533	-0.165486	-0.0215041	0.288047	0.384003	0.163111	-0.0505323	-0.478168	-0.176675	-0.3962	-0.725114	0.487324	-0.244502	-0.0470626	-0.00810512	-0.00367514	-0.0935073
ARHGAP44	-0.592887	-0.377786	-0.797837	-0.578256	-0.277941	-0.559994	0.331702	-0.616652	-0.110661	-0.208005	-0.680471	-0.059654	0.116763	-0.264578	0.531452	0.263779	0.352606
ARHGAP5	-0.600222	-0.396574	-0.476632	0.288039	0.0770861	-0.436569	0.0710633	-0.202406	-0.394101	0.320412	-0.304314	0.387857	0.587638	-0.170878	0.307676	0.601048	0.663005
ARHGAP6	-1.00758	0.339352	0.509604	-0.932907	-0.173264	0.570115	0.47817	-0.236924	0.399599	0.69539	-0.963479	-0.152415	0.0764284	0.607934	-0.402474	0.571259	-0.558805
ARHGAP8	-0.116959	-0.46056	-0.350206	0.0207095	0	1.09891	1.05064	2.5031	0.753733	0.661797	0.832608	-0.103413	-0.229716	-0.0368199	0.37313	-0.0402312	-0.343592
ARHGAP9	1.6924	1.49732	0.703435	0.593466	-0.41378	1.14348	-0.841195	0.878496	1.34014	-0.676921	-1.41652	-2.15057	0	-1.80965	-3.15834	0.124374	-2.26865
ARHGDIA	-0.350416	-0.824319	-0.450348	-1.05163	-0.843056	0.176458	0.643212	0.0135918	0.404388	0.243001	1.43551	-0.809566	0	0.574982	-0.962318	0.0128822	-1.08554
ARHGDIB	1.36684	0.517915	0.644091	0.348248	-0.0422916	0.513449	0	0.27641	0.252359	0.179296	-0.202419	-1.14806	-1.41311	-0.516375	-1.30579	-1.34187	-1.46131
ARHGDIG	-0.0968051	0.519957	-0.463842	-1.58714	0	2.03674	2.37701	-0.17928	-0.257449	1.86516	1.83185	-0.461867	1.61278	-1.32687	1.67023	-0.753211	1.30601
ARHGEF1	0.211578	0.2718	0.112734	-0.289758	-0.53938	1.03291	-0.0620124	0.137764	0.171994	-0.109833	-0.431545	-0.553278	-0.447032	-0.23655	-0.618756	-0.0838959	-0.626147
ARHGEF10	-0.185528	0.232884	-0.357981	-0.776881	0.269682	0.392989	-0.529316	0.0760772	-0.319675	0.2353	-0.676186	0.00608337	0.394781	-0.0806068	0.656386	0.113064	0.466465
ARHGEF10L	0.127492	-0.0671601	-0.255548	0.188591	0.12699	-0.313687	-0.137749	-0.307042	0.223027	-0.184508	0.0423045	-0.0922399	0.218819	-0.00569534	0.0601959	-0.184918	0.759034
ARHGEF11	-0.211667	-0.532949	-0.359923	0	-0.147544	0.962007	1.29708	0.819153	0.950429	0.709046	1.24785	0.656948	-0.235733	-0.943468	-0.185547	-0.413384	0.0958338
ARHGEF12	-1.14453	-0.632022	-0.626117	-0.516816	-0.69934	0.0902653	0.2609	0.275481	-0.0256863	0.528064	0.570469	0.0550723	0	-0.216176	-0.346172	0.255092	0.463231
ARHGEF15	-0.0228615	0.940447	0.833219	0.533853	0.628006	-0.510983	-0.903876	-0.86894	-0.786322	-1.16286	0	0.116943	0.454696	0.765429	-0.501884	0.405774	-0.257854
ARHGEF16	-1.28917	-0.423786	-1.23772	-2.0449	-0.218421	0.0193105	0.430781	-0.692851	-0.599134	-0.16121	1.10457	0	0.681658	0.397288	1.87005	1.71604	0.106278
ARHGEF17	-0.39421	-0.254661	-0.309322	-0.256959	-0.20986	-0.828917	0.00268936	-0.145498	0.102415	0.288314	0	-0.0714922	0.0656719	0.557454	0.110512	0.458267	0.306947
ARHGEF18	0.67836	0.268845	0.604767	0.337155	-0.0406456	0.291963	-0.0836282	0.464813	-0.326603	-0.142824	-0.23296	-0.408988	-0.4679	0.0155942	-1.02948	0.203145	-0.195778
ARHGEF19	-0.0847631	-0.389281	-0.653846	-0.421668	-0.396377	0.603671	0.22201	0.135413	0.0176115	0.469192	0.891794	-0.815656	-0.0982869	-0.493704	0.952402	0.0407743	-1.08756
ARHGEF2	-0.268383	-0.190212	-0.168762	-0.3978	-0.153324	0.808718	0.621165	0.502318	0.24206	0.327732	0.443282	0.488596	-0.157773	0.0226493	0.197192	0.180053	-0.12963
ARHGEF25	0.0917017	0.336429	-0.0921254	-0.390112	0.0374703	0.601422	0.650461	0.328784	-0.0278189	-1.405	-0.388007	-0.117153	0.198401	-0.601123	0.951137	-0.280356	0.621723
ARHGEF26	-0.853979	0.0748134	1.11838	0.607733	-1.18246	1.25287	-0.809718	0.599604	0.619963	-0.139634	-0.580364	-0.875623	-0.730674	0.726325	0.158591	-0.0858653	-1.09768
ARHGEF3	0.517221	-0.173055	-0.0449324	-0.221393	-0.153213	0.494313	0.261951	0.953293	0.295145	-0.0847492	0.687896	0.789163	-0.418584	-0.755202	-0.458526	0.226855	0
ARHGEF33	-0.138202	-0.494194	-0.395882	0	0.0239172	1.6952	1.05876	0.837862	0.766337	0.733057	0.848176	-0.108231	-0.233775	-0.0215378	0.358935	-0.0359297	-0.318105
ARHGEF35	-0.792115	0.482081	1.05368	0.9352	-0.350836	-0.510184	-0.901892	-0.247751	1.15893	0.424455	-1.85819	-0.429542	1.36138	0	0.183348	-0.540065	0.247744
ARHGEF37	-0.699669	-0.476197	-0.500464	-0.734736	-0.695848	0.57236	0.317365	-0.231262	-0.0780411	0.443461	0	0.0701694	0.154879	-0.549329	0.311499	0.0923729	0.328471
ARHGEF38	-0.268707	-0.261114	0.429212	-0.458633	-0.114234	0.202123	1.02052	0.34588	0.457818	0.482142	0.704471	0.330885	0.00299764	0.00302148	0.25957	-0.388747	0.211793
ARHGEF4	-0.379682	-0.499326	-0.37583	0.111675	-0.525139	0.776446	1.17683	0.677236	0.877965	0.418151	0.361505	-0.133948	-0.581089	-0.79416	1.12965	-0.677864	-0.0764861
ARHGEF40	-0.454187	0.213063	-0.531575	0	-0.440545	0.310268	-0.276214	-0.060812	0.327368	0.237851	0.532042	-0.844847	-0.33488	0.582528	0.14271	0.760468	-0.157265
ARHGEF5	-0.321265	0.49542	0	-0.273839	-0.317051	0.67765	-0.0249748	-0.320037	0.488911	0.198574	0.681653	-0.58287	1.58757	0.167583	0.447103	-0.0132728	-0.160288
ARHGEF6	-0.30713	0.234813	-0.0193267	0.25477	-0.175088	-0.240804	0.319661	0.417291	-0.193656	0.16854	0.586582	0.105073	0	-0.690449	-0.0358686	-0.495217	0.742936
ARHGEF7	-0.428765	-0.023266	-0.0909925	-0.365743	-0.306566	-0.235488	0.105713	0.797885	-0.249571	-0.247176	-0.0370297	-0.159522	0.320069	0.20552	0.426328	0.136262	-0.00677935
ARHGEF9	-0.606946	-0.593276	-0.449437	0.141628	-0.13912	0.205625	0.581594	0.208329	0.139988	0.377405	0.284587	0.391659	-0.931006	-0.478055	0.337071	-0.495501	0.469596
ARID1A	-0.698163	-0.764211	-0.71403	-0.772106	-0.698522	0.785648	1.11869	0.660292	0.479112	0.858613	0.774578	0.260789	0.102293	-0.602659	-0.619826	0	-0.2629
ARID1B	-0.0944312	0.0562065	0.0801853	0.114565	-0.0322113	-0.322867	0.0988756	-0.279643	-0.112385	-0.0461346	-0.517062	0.0573755	0.0116656	-0.165992	0.135051	-0.11586	0.176937
ARID2	0	-0.12894	-0.328033	0.0393972	0.17198	0.914136	0.0993223	0.0495806	-0.218501	0.191577	-0.496775	-0.255456	-0.11037	-0.253495	-0.30262	0.122196	0.302328
ARID3A	0.281097	0.469045	0	0.23374	-0.211514	-0.0708609	-0.38499	-0.170519	0.376848	0.0373044	-0.754531	-0.299074	0.750745	-0.351877	-0.0997395	0.132294	0.19245
ARID3B	0.406916	0.609664	0.190144	0.178224	0	0.85532	-0.00847149	0.142207	0.234831	0.00710678	-0.809627	-0.338245	-0.221731	-0.828722	-0.558274	-0.586256	-0.722091
ARID3C	-0.805915	0.0769343	0.230406	0.0853367	-0.392932	1.18729	0.99279	-0.322223	-0.0270166	0.977038	0	-0.545481	0.461184	-0.00767803	-0.881634	0.351487	-1.00384
ARID4A	-0.102442	0	-0.157761	-0.0797844	-0.398807	0.357534	0.501884	0.328769	0.283015	0.364271	-0.326708	0.48879	0.0366378	-0.0338359	-0.0912495	0.650386	-0.102607
ARID4B	0.0204245	0.482145	-0.0301757	-0.0715809	-0.440398	0.851576	0.259214	0.697257	0.743178	0.119597	-0.179437	0.436697	-0.0536289	-0.509004	-0.195645	0.131565	0.0205836
ARID5A	-0.444155	0.393764	-0.0932625	-0.645996	-0.635525	-0.184273	0.00921313	-0.057518	0.361997	-0.0465633	0.419874	-0.223888	0.894972	-0.102058	-0.213711	1.29054	0.347009
ARID5B	-0.432641	-0.180348	0.0236747	-0.392617	-0.998368	-0.211261	1.8839	0.0964303	0.0579972	0.191161	0.580958	0.0928602	1.78928	-0.0595126	-0.461183	1.29548	-0.583843
ARIH1	-0.159129	-0.0328605	-0.0673225	0.127227	-0.0874269	-0.0676205	-0.078012	-0.0610268	-0.0554819	0.0584674	-0.465607	0.0519321	0.514852	0.131524	-0.0740209	0.30209	0.330443
ARIH2	-0.799439	-0.320076	-0.667975	0.113195	0.00916099	-0.142979	0.298403	0.149552	-0.063158	0.343384	0.144419	-0.351622	-0.0691462	-0.00899315	0.0744391	1.04574	0.247739
ARL1	-0.0398979	-0.0696411	-0.252764	0.102071	0.181962	-0.329746	0.233333	-0.132295	-0.0289392	0.40044	0.292576	0	0.0159798	0.267953	-0.0452309	-0.129622	0.0268841
ARL10	-0.39311	-0.266393	-0.266366	0.0913544	-0.153166	0.454617	0.0682559	0.334288	-0.111373	0.241785	-2.34019	0.19415	-0.576842	-0.432303	0.760023	0.320271	0
ARL11	1.17687	-0.273316	0.136574	0.367887	-0.754297	-0.0810976	0.69783	0.373494	0.428277	0	0.0898147	-0.732564	-0.888266	-0.68689	0.290032	-0.687898	-1.00886
ARL13A	-0.196302	-0.570498	-0.454855	-0.0692968	-0.0501454	0.574014	0.949265	0.720268	0.676346	1.03577	0.807315	0.273509	-0.207442	0.232113	0.368551	-0.00951314	-0.320945
ARL13B	-0.130479	-0.149044	0	-0.232771	-0.16574	0.455162	0.22337	0.674551	0.280267	0.619827	0.0900626	0.433523	0.294977	-0.427273	-1.4437	-0.0836587	-0.237544
ARL14	-0.187038	-0.570679	-0.457426	-0.0618229	-0.0466075	0.548511	0.962871	0.733617	1.1617	1.01996	0.79768	-0.0560169	-0.200094	0.0272865	0.382356	0	-0.316845
ARL15	-0.384335	-0.213785	0.302875	0.244531	0.0251541	-0.49217	-0.696244	0.346644	-0.0393496	-0.0926971	-0.1264	0.783484	0	0.165084	-0.879338	0.858146	0.278793
ARL16	-0.0130806	-0.228842	-0.486687	-0.513748	0.0888357	0.154923	-0.030221	0.138315	0.375065	0.0156336	0.427309	0	0.256228	-0.35465	-0.211272	0.166549	-0.0685339
ARL17A	0	2.49302	0.0942507	-0.100172	-0.0696945	1.05881	-0.295502	1.07443	0.317615	-0.110376	-1.09382	-0.431082	-0.578352	0.291593	0.568764	0.16764	-0.166879
ARL17B	-0.0179462	0.117149	0.194592	-0.360588	-0.0824904	-0.0794029	0.291207	0.139342	0.65418	-0.0634494	-0.322543	0.185411	-0.762346	-0.0220757	0.23959	-0.589964	-0.250844
ARL2	-0.962788	-1.31023	-0.801807	-0.797925	-0.678294	0.0730667	0.631393	0.180791	0.387331	0.441874	1.14546	0.205038	-0.684084	-0.43331	0.0359631	-0.302709	0
ARL2BP	-0.126285	-0.215383	-0.0779047	0.229531	0.190743	-0.461902	-0.550921	-0.457302	-0.550145	0.117972	0	-0.322728	0.248279	0.655601	0.0732431	0.651922	0.242191
ARL3	0	-0.484633	-0.0745454	-0.0977602	0.0863266	0.123998	0.839869	0.304304	0.192638	-0.10465	0.371891	0.296603	-0.724048	-0.178509	0.430291	-0.467629	-0.228016
ARL4A	-0.186875	-0.0299377	0.516987	0.0779319	0.104393	-0.235666	-0.281497	-0.525746	-0.302279	-0.495852	0.977769	0	1.77805	1.32464	-0.80964	3.12247	0.154743
ARL4C	1.01235	0.556603	0.214569	0.163661	-0.616225	0.295075	-1.64279	0.106357	-0.192762	-1.81679	0	-2.26821	0.0193577	-0.0290432	0.0877094	-0.595925	-2.12056
ARL4D	-0.184799	-0.0199814	0.305913	-0.233492	0.636517	0.641015	-0.506276	0.263442	0.491816	-0.707606	-0.600412	-0.59889	0.847945	0.0304351	-0.338971	0.682875	0
ARL5A	-0.291769	-0.319495	-0.399799	0.14245	0.0534592	-0.0724373	0.311472	-0.202486	-0.0868349	0.142899	0.0988655	0.245543	0.112535	-0.512158	0.665519	0	-0.103985
ARL5B	-0.32756	0.155652	-0.305715	0.0606451	0	-0.374847	0.000757	-0.0438881	-0.244654	-0.254508	0.160078	0.564521	1.53119	0.492698	-0.494778	0.557187	-0.346604
ARL5C	-0.250593	0	-0.148337	0.0771256	0.236711	-0.942007	-1.10615	-0.677407	-0.385043	0.163918	-0.380745	0.723296	0.262343	0.326774	-0.111697	0.416981	0.439556
ARL6	0.0180216	0.416424	0.417768	0.618993	0.506734	-0.0797091	0.395609	-0.551751	-0.0784435	1.01202	-0.198172	1.04763	-0.337284	-1.3745	-0.961765	-1.41795	0
ARL6IP1	0.243289	0.183207	0.476765	0.0512032	0	0.452022	-0.158525	0.325057	-0.148644	0.65028	-0.180011	0.212245	-0.0752158	-0.573178	-0.929415	-0.298792	-0.459141
ARL6IP4	-0.660902	-0.798538	-0.51501	-0.743931	-0.250471	-0.00861167	0.421102	0.216137	0.0481205	0.403424	0.983697	0.0516975	-0.236551	0.411168	0.203156	0.113793	-0.00598431
ARL6IP5	-0.201108	-0.156408	-0.0582314	-0.0655813	0.4273	-0.676057	-0.112051	-0.326706	-0.532359	0.0308399	0.0763435	0.192476	0.187454	0.0603094	0.303732	0	0.343118
ARL6IP6	0.0643883	-0.0910406	0	-0.259748	0.097435	0.336049	-0.664059	0.214659	-0.0677652	0.0352168	-0.564846	0.0608349	-0.434869	0.0112243	-0.51887	0.112443	-0.104073
ARL8A	-0.373811	-0.504349	-0.415638	-0.332235	-0.260998	0.378923	0.435485	-0.215221	0.248542	0.238696	0.798879	-0.282868	0.302964	0.411701	-0.0682621	0.387466	0
ARL8B	-0.310477	-0.268215	-0.183907	-0.0345147	0.0557826	-0.302681	0.2098	-0.220491	-0.0609431	0.25134	0.242189	0.484969	0.425715	-0.30385	-0.14157	0.109346	0.256559
ARL9	0.967925	0.588749	0.639053	-0.574125	-0.168464	0.374609	0.203911	-0.161006	0.780023	0	-0.44003	-0.645753	0.244406	-0.349325	-0.52142	0.414743	-0.596316
ARMC1	-0.281948	-0.239922	-0.500613	0.280432	0.353706	0.197672	0.275537	-0.00260544	0.0761566	0.523107	0.264886	0	-0.0879469	-0.502706	-0.209349	-0.454275	0.43643
ARMC10	0.0248391	-0.0257413	-2.543e-06	0.125056	0.199195	-0.296586	0.174012	-0.211072	-0.215423	0.331252	0.421813	-0.136455	0.223963	-0.174084	-0.241474	-0.100478	0.345239
ARMC2	-0.0226126	0.528694	0.0223289	-0.590279	0	0.910205	0.105264	0.576493	-0.458818	0.596004	-0.544701	0.161457	-0.704426	-0.883387	0.452331	-0.915263	-0.337919
ARMC3	-0.333549	-0.870492	-0.444712	-0.202735	-0.363642	0.265754	1.32696	0.413883	0.408532	0.629142	0.461385	-0.349063	-0.268254	-0.278279	0.120032	-0.355722	-0.17622
ARMC4	-0.238466	-0.204669	-0.116626	-0.335918	0.350617	-0.0266349	1.18973	0.404755	0.00803996	0.763857	-0.867348	1.02948	-0.0916438	1.2446	-0.488557	-0.626615	-0.0590909
ARMC5	0.0626698	-0.12604	0.0469937	-0.133844	0.105381	-0.53146	-0.331586	-0.439424	-0.698194	-0.500267	-0.410309	-0.0844722	0.134696	0.214284	0.149409	0.339344	0.161158
ARMC6	0.0881186	-0.280207	0.486328	-0.197738	0.587942	-0.897848	-0.285328	-0.750016	-0.361369	-0.348415	0.563574	-0.201016	0.829556	0.790743	0	1.24239	0.354995
ARMC7	-0.149808	-0.322238	-0.0887117	-0.34364	-0.293718	0.537116	0	0.261624	0.106711	0.303089	-0.498527	0.0684509	-0.209144	0.243222	0.133096	-0.0688076	0.0337563
ARMC8	0.0239639	-0.121808	-0.102785	0.141147	-0.414027	0.249892	0.0111163	0.157487	-0.0483972	0.0778403	-0.372625	-0.227091	0.192967	0.39567	-0.401849	0.507656	-0.13334
ARMC9	0.164694	-0.172059	-0.0486848	0.577507	-0.0990639	0.334973	0.174401	-0.578179	0.560687	0.898359	0.0920904	0.698488	-0.026495	-1.35572	-0.304728	-1.10906	-0.561333
ARMCX1	-0.33948	-0.502349	-0.270145	-0.143561	0.22578	-0.277459	0.124428	-0.169789	-0.622128	0.255333	0.477329	0	0.137006	0.134486	0.539674	-0.400878	0.54668
ARMCX2	-0.213212	-0.36938	0.00694275	0.174976	-0.170608	-0.166465	0.422747	0.122629	-0.0593672	0.445499	0.11389	-0.424523	0	-0.4179	0.332853	-1.41522	0.310863
ARMCX3	-0.119272	0.478239	0.492764	0.645156	0.564781	-0.52603	-0.119545	-0.596023	-0.573091	-0.284117	-0.278484	-0.0274696	0.202289	0	0.602087	0.148708	0.853627
ARMCX3-AS1	-0.814342	-0.0239816	0.778227	-0.124734	0.935506	1.0872	0.657369	-0.195592	-0.00681686	0.0128794	0	0.428009	-0.323409	-0.66177	0.45518	-0.29579	0.143781
ARMCX4	-0.160433	0.883277	0.269013	0	-0.56734	0.53097	-0.343198	0.297537	0.268189	-0.0445023	-2.25074	0.0873141	-0.489332	-1.02387	0.315751	1.53979	-0.476865
ARMCX5	0.00369644	0	0.219559	0.240335	0.016674	-0.289706	0.109531	-0.264666	-0.600094	-0.074976	-0.0107851	-0.368792	0.151364	0.126625	0.313411	-0.63877	-0.542742
ARMCX6	-0.173766	-0.123025	-0.0770125	0.226861	0.386091	0.159798	-0.0390301	0.144559	-0.0577076	-0.147376	0.552183	-0.0998671	-0.474316	-0.224032	0.723304	-0.39679	0.32598
ARMS2	-0.413888	0	0.373653	1.54746	-0.110488	0.876253	0.690544	1.39684	-1.68101	2.36718	-1.50236	0.724381	-2.90843	-3.22996	-1.37994	-2.00033	0.155406
ARNT	0.142729	-0.0905724	-0.182589	0.140165	-0.0811076	0.132331	0.420607	-0.0558043	0.000751	0.357302	-0.472421	0.357631	0.0414872	-0.0951347	-0.0846243	0	-0.291574
ARNT2	-0.0867486	-1.12023	-0.153238	-0.403318	0.284488	-0.0668595	0.425683	-0.124722	0.268161	0.629617	0.132186	0.14781	0.0408869	-0.629697	0.422889	-0.987315	0.320015
ARNTL	0.83904	0.317065	0.380973	-0.0696323	0.470723	-0.149165	-0.354152	0.827951	-0.578933	-0.681172	-0.843891	0.474254	0.245163	0.0741436	-0.728279	0.479925	0.332591
ARNTL2	0.968493	-0.360041	0.39436	1.26325	-0.709274	-0.265132	0.352769	-0.274677	0.699734	-0.748769	0.0220394	0	1.23065	-0.491633	-0.739932	1.22154	-0.557159
ARPC1A	-0.617557	-0.670115	-0.634785	-0.667039	0.000781	0	0.359528	0.162694	-0.0393009	0.488105	0.505176	0.228246	-0.102642	-0.349878	0.022768	-0.575457	0.374315
ARPC1B	0.968673	0.173741	0.34588	0	-0.208188	0.921166	-0.290155	0.343774	0.187905	-0.451506	0.981588	-1.34484	-0.00748539	0.270803	-1.00402	-0.221583	-0.829133
ARPC2	0.209011	-0.17733	-0.0929089	-0.0709076	-0.361631	-0.0135927	0	0.0152874	0.363258	0.120102	0.610438	-0.488387	0.103418	0.21866	-0.288212	0.22286	-0.201227
ARPC3	0.806744	0.15579	0.295575	0.34498	0	-0.334736	-0.494755	-0.587872	-0.34833	-0.243546	-0.178918	-0.648818	0.157724	0.517286	-0.368265	0.335594	0.0712719
ARPC4	0.133413	-0.17108	-0.0574069	-0.478974	-0.259172	0.471067	0.533033	0.081594	0	0.0338469	0.921406	-0.375109	-0.00849867	0.51651	0.0573087	-0.0310206	-0.1655
ARPC4-TTLL3	0.419581	0.541186	0.296825	0.109045	-0.29087	0.937693	0.347718	0.768866	0.813695	0.0570936	-0.808779	-0.276839	-0.408894	-0.45542	-0.128879	-0.31238	-0.568594
ARPC5	0.726586	0.159975	0.280566	-0.472511	-0.323165	-0.10087	-0.0921971	-0.0509518	-1.22591	-0.0217697	0.15813	-1.82062	0.500936	-0.293484	-0.458375	0.900105	-0.0369374
ARPC5L	-0.779585	-0.653483	-0.719012	-0.0808973	-0.183741	-0.205284	0.185161	0.0354042	0.00622463	0.448805	0.212116	-0.86571	0.703101	0.127119	-0.285093	0	0.143046
ARPM1	-0.913228	0	0.102936	-0.34586	-0.759831	-0.0700512	-0.135691	-1.00926	-0.24521	0.00730801	-0.3091	0.126964	0.718727	0.576927	1.58128	0.500094	0.119675
ARPP19	-0.578796	-0.610834	-0.426363	-0.350048	-0.15183	-0.0130482	0.36774	-0.0937185	-0.170355	0.202316	0.632119	-0.0845637	0.259422	0.152361	-0.00997162	0.508575	0.342816
ARPP21	-0.170517	-0.531006	-0.412303	-0.0323305	-0.0201709	0.602849	0.973292	0.759419	0.697816	0.963089	0.808069	-0.116324	-0.239938	-0.0154979	0.335435	-0.0312481	-0.348599
ARR3	-0.605074	-0.25856	-0.517314	-0.130721	2.67435	0.169101	1.12024	0.375749	0.263	0.620883	0.371231	-0.452631	-0.198819	0.110063	0	-0.240497	-0.598082
ARRB1	0.325797	0.00256443	0.122013	-0.954407	-0.0160751	-0.0526576	-0.637238	-0.254419	-0.433272	-1.04333	0.876168	0.151436	0.196787	0.0802727	0.0116315	0	-0.0522757
ARRB2	0.583792	0	0.0640421	-0.0913687	-0.501644	0.849547	0.451806	0.996994	0.899002	-0.385013	0.311026	0.0323591	-0.47694	-0.561313	-0.479576	-0.450844	-0.347313
ARRDC1	0.143591	-0.366009	-0.206181	-0.674834	-0.581936	0.576654	0.305571	0.62968	0.696303	0.614953	0.67155	0	-0.386118	-0.321973	0.0276136	-0.385179	-0.321249
ARRDC2	0.210444	0.355071	0.879897	0.211945	-0.24806	1.19999	0	1.15242	0.468122	0.000285	-1.82639	-0.365082	-1.7015	-0.227949	-1.31455	-1.67415	-0.319793
ARRDC3	0.919601	1.45077	1.29506	1.04133	0.596936	0.436501	0	-0.0512524	-0.338489	0.263572	-1.2682	0.44715	-0.432529	-1.37817	-2.06327	-1.0484	-1.27148
ARRDC4	-0.38008	-0.155124	0	0.130386	-0.232293	-0.522487	0.026721	-0.352412	-0.542971	0.31741	-0.271833	-0.528619	0.612036	0.392014	0.71478	0.686681	0.165427
ARRDC5	2.57006	2.5236	1.70093	0.810075	0.266202	2.76845	0	2.31955	1.44866	-0.426892	-0.385016	-1.34068	-1.455	-1.24564	-0.877229	-1.27165	-1.13155
ARSA	0.689589	0.199884	0.342382	0.46601	-0.550397	0.131075	-0.0891924	0	0.390614	0.33845	-0.216886	-0.527982	-0.636538	-0.618547	0.0600777	-0.833631	-0.144285
ARSB	0.303481	-0.429611	-0.480765	-0.121832	-0.496453	0.230198	0.482382	0.613876	0.291449	0.208879	0.116461	0.225312	-0.986663	-0.876532	-0.615517	-0.617911	0
ARSD	0.219813	0.052934	0.520443	-0.0580851	-0.503788	-0.179065	0.0348678	0.486271	-0.269123	-0.144829	0.29109	-0.0845458	-0.828268	0.428179	-0.624489	-1.09179	0.104005
ARSE	-1.13653	-1.18347	0	-0.613815	-0.48511	0.646899	0.515053	1.0549	0.253397	1.27119	0.163223	0.74063	0.340173	-0.589274	-0.1982	-0.0898371	-0.158491
ARSF	-0.964495	-1.61484	-1.84025	-1.56842	0.461847	-2.5715	0.0992117	-0.562897	0	-0.256632	1.18302	0.939033	0.837642	0.499898	1.03491	-0.567658	1.14524
ARSG	0.140434	0.277894	-0.0469782	0.0956025	-0.260901	0.302959	0.806959	0.365003	0.128936	0.221967	0.0422344	-0.00016165	-1.39854	-0.502938	-0.530206	-1.2223	0.0789673
ARSH	-0.540952	-0.870652	-0.77506	1.03031	-0.434084	2.34409	0.622982	0.457251	4.43565	0.260286	0.406425	-0.484423	-0.60967	-0.315717	0	-0.417775	1.13139
ARSI	5.14955	-0.0688877	-0.212092	0.0615673	-0.585071	1.53616	0.529069	-0.484134	0.767061	-0.583741	1.05044	0.648639	0.84601	-0.142616	-0.413498	0	-1.24431
ARSJ	-0.0729709	-0.775529	0.724759	-0.77538	0.24266	-0.0729885	0.693216	0.0128188	1.68837	0.331164	0.0839863	2.04789	-0.919608	-0.686206	0	-0.729555	-1.01346
ARSK	-0.246184	-0.0326931	0.0552046	0.23771	-0.137098	0.43168	-0.445574	0.304662	0.204009	-0.286113	-0.739985	0.173268	-0.442083	-1.66664	-0.436313	-0.262791	0.419939
ART1	-0.495434	-0.851065	-0.454569	-0.356673	-0.332771	0.222699	0.701265	0.479736	0.409132	0.368129	0.493117	-0.469559	0.212832	-0.383418	0	0.635367	-0.677257
ART3	-1.75975	-1.23897	-1.94398	-0.744147	0.393912	-0.632308	1.0681	-0.388092	-0.297763	0.485877	0	-0.0141048	0.00262547	1.05956	0.0152769	0.474203	0.169192
ART4	1.76286	2.02493	1.11382	2.21761	0	1.46996	-0.854487	0.463193	0.15294	0.679637	-0.680939	-1.21609	-2.09614	-0.84879	-0.927878	-0.276759	-0.356413
ART5	-0.867571	0.195739	-0.729243	-1.46846	0.285211	-1.79648	-0.010545	-0.982775	-0.702969	-1.04427	0.285085	-0.0897555	0.768948	0.959071	2.38666	1.12456	0.0142114
ARTN	0	0.632622	-0.00767899	0.128903	-0.0556002	-0.253429	-1.01568	-0.483716	-0.0647945	-0.831635	0.124352	-0.375273	1.4693	0.835135	0.5461	0.952647	0.192202
ARV1	-0.647071	-0.925012	-0.673606	-0.445107	0.161813	-0.502154	0.284034	0	-0.0482187	0.52038	0.832847	0.422832	-0.355478	0.326046	0.257043	-0.273509	0.0317955
ARVCF	-0.558387	0.0606411	-0.0875177	-0.132479	0.205979	-0.74422	-0.688951	-0.801863	-1.26866	-0.674394	-1.17035	0.190948	0.277897	-0.879435	0.900844	0.194256	0.768845
ARVP6125	-0.232926	0.73681	-0.509469	-0.112464	-0.108323	0.404356	0.929645	0.692994	0.649077	0.81294	0.746458	-0.0644636	-0.213866	0	0.367796	-0.0130787	-0.334359
ARX	-0.0446458	0.0919824	0.516974	0.109379	0.564269	-0.392545	-0.6259	-0.22172	-0.822462	-1.11581	-0.330802	0.175502	-0.486942	0.329128	0	0.310195	0.264864
AS3MT	-0.181702	-0.150747	-0.280046	-0.215389	0.388096	-0.492811	0.175556	-0.0903754	-0.0246143	0.0418584	0.124793	0.26475	0.0563746	-0.586989	0.0582643	-0.685007	0.0356531
ASAH1	-0.0467691	-0.025795	-0.180915	0.339106	0.718519	-0.468275	-0.143977	-0.10857	-0.34778	0	0.661774	-0.291629	0.605124	0.919665	0.315964	0.819217	0.616152
ASAH2	-0.426229	0.198626	-0.109676	0.363207	0.0512013	-0.0422401	0.590548	-0.263603	0	0.245405	-0.070817	0.866432	-0.134106	0.0144401	0.418155	-0.160944	-0.0166674
ASAP1	0	0.0121088	-0.21001	-0.0791044	-0.55114	1.21303	1.08823	1.19349	0.918315	1.06124	1.05218	0.550682	-0.375842	-0.0718451	-0.911293	-0.0647154	-0.582404
ASAP1-IT1	0	0.599776	-0.0713806	0.154687	-0.780058	0.420617	-0.592047	0.545441	0.60899	-0.427404	-3.10407	-0.526348	0.0460844	0.0737019	-0.0480728	0.604575	-0.475601
ASAP2	-0.168541	0.178081	-0.0738506	0	0.164871	0.429963	-0.0965462	-0.080544	-0.184046	0.234609	0.0872049	-0.267617	0.0928926	-0.131938	-0.584659	0.435274	0.0772543
ASAP3	-0.0829256	-0.54266	-0.639472	-0.37472	0.15635	-0.278046	-0.277304	-0.232465	0.244012	0.179685	0.0374765	0.239914	0.216955	-0.108998	0.441907	-0.401968	0.304034
ASB1	-0.763016	-0.498796	-0.606429	-0.670183	-0.307341	0.323861	0.566031	0.0145802	0.0739031	0.966323	0.478218	-0.0988221	-0.405062	0.46156	0.37739	0.441228	-0.134876
ASB10	-0.236456	-0.321924	-0.345423	-0.199563	0.797431	-0.275958	0.444787	0	0.583315	-0.231704	1.08495	0.763148	0.0187893	-0.494029	0.236022	-0.845098	0.404611
ASB11	-0.647095	-0.677867	0	-0.157816	0.260575	-0.862329	0.301385	1.52964	-0.522302	-0.19636	0.193332	0.569303	0.627224	-0.369666	0.0428328	-1.41976	2.14897
ASB12	-0.815266	-2.90878	-0.634662	-0.670533	0.575281	-0.538776	0.0379825	0	-0.0511727	-0.738855	2.6615	0.575975	0.146957	0.384346	-0.552004	0.909702	0.15543
ASB13	-0.221494	-0.086297	0.18842	-0.0951209	0.19291	-0.606243	-0.394	-0.990921	-0.495626	-0.137645	0.150311	0.383228	-0.0311925	-0.0269597	0.442271	0.00816918	0.209447
ASB14	-1.15673	-1.54153	-1.43013	0.434871	0.33316	1.05993	0	-0.12636	0.140882	-0.0147023	0.600261	-0.357054	0.429696	-0.934002	-0.57497	0.966118	1.18456
ASB15	-0.364471	-0.550796	-0.444216	-0.793234	0.500047	0	0.1929	0.118498	-0.127069	0.549707	-0.814148	0.683704	1.35922	-1.16379	0.560199	-0.406615	1.06914
ASB16	-0.229808	-0.669891	-0.270222	0.0862184	0.550736	-1.65122	-0.0575891	-1.39775	-0.684454	-0.0101218	0.44996	0.444717	0.0326972	0.147938	0	0.119751	0.235913
ASB17	-0.15393	-0.526127	-0.419609	-0.0231767	0.00903749	0.645233	1.01141	0.786598	0.740298	1.94985	0.849405	-0.0926747	-0.226909	0	0.373086	-0.0280185	-0.319207
ASB18	0.0640473	0.14347	-0.105625	0.286228	0.315826	-0.977139	-0.455656	-0.195439	-0.736705	-0.961192	-0.593059	0	0.35903	0.136763	0.154642	-0.124995	0.00555229
ASB2	-0.635477	-0.321667	-0.534251	-0.441357	0.606352	-0.309833	-0.285268	-0.080266	0	-0.0187511	1.69019	0.160101	1.0525	0.181091	0.744431	1.61592	0.741417
ASB3	-0.149859	0.041481	-0.114785	-0.198178	-0.225167	0.540601	0.373793	0.38824	0.393037	0.17439	-0.301167	0	-0.0880747	-1.16741	0.140921	-0.879888	0.196426
ASB4	-0.77267	-0.460289	0.0728519	-0.666609	1.11028	0.455437	1.37593	0.66121	-0.232499	1.4718	-0.0950282	-0.232807	-0.0385196	-1.02513	0.830893	-2.4605	0.628259
ASB5	-0.401875	0.00538826	-0.477888	0.266438	-0.15766	-0.283471	0.625007	0.349133	-0.167861	0.0630579	0.199823	-0.304188	-1.16804	-0.101422	0.862086	0.0379629	0
ASB6	-0.330909	-0.207829	-0.138814	-0.148727	-0.154857	0.281706	0.143233	-0.0403056	-0.175916	0.0256915	0.171114	-0.262567	0.17936	0.0395565	0	0.229856	0.25285
ASB7	0.0358608	0.0250692	0.0683835	0.194242	0.110955	-0.0273497	-0.108262	0.0835595	0.0849531	0.416885	-0.422871	0.419124	0.0527074	-0.615263	-0.408056	-0.691884	-0.120528
ASB8	-0.380826	-0.166363	-0.227773	0	0.513985	-0.814545	0.504508	0.0258102	-0.0493121	-0.125072	0.160113	0.422199	-0.0307183	-0.153604	0.343146	0.0521503	0.677975
ASB9	1.42734	0	1.60858	0.887372	0.584072	0.555578	-0.845904	2.65177	0.463266	-0.952075	-0.524653	-0.641475	-1.00729	-0.0779438	-1.35642	-0.758815	2.89672
ASCC1	-0.33591	-0.70123	-0.190206	-0.437863	-0.223172	0.634274	0.641881	0.479904	0.323973	-0.0647583	0.559278	-0.158212	0	0.635197	0.120638	0.658719	-0.0212135
ASCC2	-0.469438	-0.619398	-0.389885	0.00577927	-0.68458	0.821549	1.55923	0.864102	0.860912	0.515905	1.4542	0.385014	-0.731109	-0.403722	-0.235098	0	-0.0179291
ASCC3	0.463884	0.258553	0.118855	0.909098	0.0610847	-0.191478	0.116218	0.0586805	1.12784	-0.298356	-0.793272	-0.219438	-0.143711	-0.38593	0	-0.693901	-0.276322
ASCL1	-0.852994	-1.20572	-0.497527	-0.715071	0.0465326	0.267396	0.777238	0.0794792	0.00487709	0.222235	0.12123	-0.0458522	-0.176692	0	-0.327648	0.0262899	-0.1953
ASCL2	3.09053	1.03944	1.86285	1.99151	0.399605	1.82846	0	0.929666	2.20538	-0.519061	-0.58179	-0.953638	-2.09564	-1.25241	-2.64478	-2.2077	-2.70504
ASCL3	-0.838466	-1.15218	-1.05894	-0.706509	-0.747204	1.01691	0.833796	0.200207	0	1.43162	0.0749888	0.650013	0.655113	-0.560185	-0.252181	-0.664783	0.276088
ASCL4	-0.0437026	1.39095	-0.445042	-0.0775242	-0.0445151	2.30706	0.920416	0.695692	0.651774	1.1515	0.767255	-0.1242	-0.241062	0	0.323144	-0.0483317	-0.347084
ASF1A	-0.275343	0	0.077045	-0.312162	-0.0623946	0.108015	0.702056	0.190175	0.408804	0.497972	0.394356	0.499587	-0.226934	-0.9757	-0.622452	-1.46086	-0.578818
ASF1B	1.04752	0.235398	0.429522	0.496981	0.186717	-0.487015	-1.24443	0.0368881	-0.0768423	-1.07962	-0.376877	0.271046	-0.0211039	0	-0.128598	0.836693	-0.222309
ASGR1	0.967136	-0.532529	0.448944	0.544814	-0.684901	0.0653198	-0.308488	-0.087266	0.0459437	-0.922161	-0.106811	-0.636349	0.747994	0.109609	-0.0950897	-0.111952	-1.73642
ASGR2	1.71975	0	0.736302	1.75487	0.00532627	0.338422	0.00789404	0.511348	0.667532	-1.7264	-1.06318	-1.15442	-0.474204	-0.306889	-1.06814	-0.320569	-0.730188
ASH1L	0.0766382	0	0.0273972	0.187645	-0.268022	-0.817555	-0.420994	-1.58721	-0.709289	-1.30586	-1.24631	-0.179248	0.371224	0.0755167	0.0494022	0.431134	0.480758
ASH2L	-0.231698	-0.367016	-0.218591	0	0.160049	-0.0615988	0.31264	0.143799	-0.191766	0.0743437	0.537657	0.297853	-0.302094	-0.054039	0.350491	-0.0289297	0.172558
ASIP	-0.734981	0.36252	0	0.462424	0.081841	-0.569137	-0.152476	-0.360613	-0.252135	-0.227611	-0.331172	0.313318	-0.200784	0.657616	0.323912	0.841404	0.587805
ASL	-0.275009	-0.273562	-0.105728	-0.658827	-0.236036	0.606254	0.844564	0.778486	0.38138	0.464452	1.30775	0.588635	-0.496773	0.148606	-0.476251	-0.597118	0
ASMT	0.137814	-0.0943074	0.390148	0.695065	1.94833	0.572679	-0.100652	0.712682	-0.00286341	0.0869575	-0.450582	1.97748	0	-1.519	-1.35837	-2.00873	-1.61896
ASMTL	-0.385535	-0.903076	-0.525447	-0.74301	-0.48174	0.202268	1.13501	0.392575	0.703956	0.958996	1.10928	0.365273	-0.703832	0	-0.614365	-0.252734	0.106076
ASMTL-AS1	0.229327	0.343553	0.292404	-0.0615244	-0.881852	1.02246	0.501591	0.773982	0.624372	0	-0.553664	-0.490905	-0.558113	-0.450498	-0.185167	-0.65225	0.0647211
ASNA1	-0.872991	-1.03044	-0.715172	-0.960242	-0.371028	0.0369358	0.855124	0.0812063	-0.126174	0.38435	1.07017	0	-0.370337	-0.0779486	0.0308256	0.00409031	0.104169
ASNS	0.311449	-0.25399	-0.16823	0.0327473	-0.786171	0.280512	0	-0.351133	0.521746	1.00368	-0.0193892	-0.841081	-0.101277	0.190194	0.216894	-0.961361	0.807816
ASNSD1	-0.384515	-0.293246	-0.0238953	-0.146535	0.208618	-0.73703	0.37843	-0.0419645	0	0.114635	0.390324	0.291877	0.639199	-0.105393	0.0143242	0.300451	-0.115645
ASPA	1.33285	1.19975	0.152346	-0.0957718	0.387565	0.83433	-2.12881	0.882841	-0.23295	0	0.122201	-1.50876	-0.571603	-1.2915	0.174506	-1.15625	-0.928676
ASPDH	-1.13649	-1.48433	0.538889	0.226573	-0.986936	0	0.0618377	-0.156208	0.541111	-0.222689	0.442403	0.796714	0.258204	-0.519289	-0.462389	0.544521	-0.303304
ASPG	-1.76595	0	-0.428923	-2.18329	-0.364933	0.439587	1.31857	-0.498436	-2.78902	-0.779027	0.920549	-0.0589085	0.97054	0.661528	2.95517	0.55194	1.11122
ASPH	-0.157849	-0.153038	-0.139076	0.144592	0.110069	-0.0578912	0.027414	0.0464951	0.258654	0.123176	-0.365544	-0.0757325	0.0340033	-0.788187	0.22174	-0.179859	0.0720841
ASPHD1	-0.149042	-1.19102	-0.290025	-0.280318	-1.30972	0.562202	0	0.0851145	0.0136595	1.06452	1.42107	-2.20407	0.513446	0.470028	1.46763	-0.0856309	-0.963274
ASPHD2	1.82411	0.454075	0.56336	0.893764	-0.560472	1.36755	-0.567583	1.17832	0.961427	-0.571017	-1.17586	-0.500209	-0.0627546	-0.918209	-0.870012	0	-0.870865
ASPM	0.750927	0.129886	-0.117659	0.236227	-0.470367	-0.0563445	0.272079	0.42181	0.631402	0.153327	0.205721	-0.309394	-0.223856	-0.674161	-0.684091	-0.879383	-0.858349
ASPN	0.0278435	1.47785	1.77781	1.14883	0.119342	1.68283	-1.39358	0.235991	0.770455	1.00024	-0.746584	-0.493558	-2.02938	-2.20544	-2.09635	-1.826	-0.96262
ASPRV1	0.449706	1.0417	0.178298	0.572648	0.426921	0.477163	-0.0733671	-0.163272	0.369001	-0.544845	-0.361628	-0.605244	-0.355809	0.383681	-0.571143	0	-0.461661
ASPSCR1	-0.305451	-0.71161	-0.506074	-0.461219	-0.23169	0.0284482	0.433096	-0.237407	-0.13328	-0.156436	0.642327	-0.0432789	0.0859434	-0.0130168	0.0896253	-0.040464	-0.0214577
ASRGL1	0.26048	0.719684	0.343979	0.729789	-0.280479	-0.613811	-0.321512	-0.52075	-0.196321	-0.403075	-0.561834	-0.386792	1.30729	0.996728	0	1.51954	0.120208
ASS1	-0.222726	-0.370826	-0.155144	0.416907	-0.61355	-0.345732	0.0304239	-0.517394	-0.524966	0.60722	1.34317	-1.14829	-0.129326	1.27623	0.178254	1.29762	0.486437
ASTE1	0.155034	0.371382	0.353621	0.159994	-0.00372934	0.223632	-0.00321579	0.194192	0.197048	0	-0.395738	0.0443177	-0.810133	-0.44937	-0.189716	-0.806285	-0.0553107
ASTL	0.150837	0.921065	0.736077	0	-0.319665	-0.816762	0.48911	0.414083	-0.152087	-0.633915	-0.481462	-0.556605	-0.668539	0.368472	0.430755	-0.0094223	0.247564
ASTN1	0.0290148	0.081666	0.149637	0.648475	-0.547727	-0.00717759	0.568408	0.667906	0.368824	1.19098	-0.311757	-0.0662522	-0.0074048	-1.37854	-0.657978	-0.729037	-1.52447
ASTN2	1.16477	0.751044	0.78444	-0.253362	0.270691	0.232147	-0.331142	-0.409229	-0.38739	-0.50257	-0.639199	-0.307467	1.00132	0.0225651	0.0249329	-0.0548277	0.0655384
ASXL1	0.214829	-0.209095	0.0855932	0.310458	-0.20889	-0.194824	-0.224359	-0.0667977	0.0280571	0.115015	0	-0.409737	0.295817	0.0667739	-0.344722	0.576187	-0.311372
ASXL2	0.134997	0.253352	0.0988894	-0.544183	0.302369	-0.246444	0.275485	0.205889	0.0397103	-0.110718	-0.72971	0.0743921	0.297325	-1.02158	-0.0370901	-0.556817	-0.310614
ASXL3	0.225562	-0.243922	0.281016	0.568292	-0.134984	0	0.135578	0.494137	-0.547899	-0.321221	-3.31196	0.84089	-1.95441	-0.665144	0.420454	-0.204772	0.306671
ASZ1	-0.15903	-0.493644	-0.399538	-0.00689173	0	0.513927	1.03631	0.831028	0.728874	0.644368	0.820152	-0.144017	1.06316	-0.0590706	0.332119	-0.0710506	-0.334066
ATAD1	-0.41324	-0.489705	-0.487186	-0.230519	0.0880089	-0.077589	0.255944	-0.339499	-0.227819	0.510703	0.590495	-0.0168438	0.419906	0.242273	0	0.519154	0.628936
ATAD2	0.152157	0	0.497062	-0.117882	-0.462944	0.31988	-0.075552	0.931964	-0.77881	-0.0709105	-0.736935	0.110906	0.071703	-1.04552	0.183282	-0.557019	1.17903
ATAD2B	0.477688	0.137055	-0.170698	0.168758	0	-0.751164	-0.0218077	0.421732	0.192839	0.158511	-0.118882	-0.23159	0.624814	-0.117684	-0.54074	-0.0981936	0.0791016
ATAD3A	-0.681445	-0.729739	-0.684488	-0.427097	-0.537998	-0.766522	0.418139	0.0528355	0.690468	0.427773	1.06306	-0.183838	0.341525	0.446701	0	1.01294	-0.0744305
ATAD3B	-0.320165	-0.171016	-0.499143	-0.26013	-0.432201	0.0444387	0.0164644	0.285237	0.439167	-0.278048	0.21002	-0.42286	0.537537	0.620293	-0.0178291	0.835389	-0.132409
ATAD3C	-0.0900693	0.0869312	-0.0977585	-0.273765	-0.0201223	-0.344617	0.2429	-0.0242536	-0.142134	-0.130639	0.417172	1.11099	0.968616	0.863365	-0.196904	0.845245	-0.184674
ATAD5	1.8446	0.815396	0.696335	1.29642	-0.778317	0.377982	0.953152	-0.0841503	1.30856	0	-0.0516357	0.787613	-1.03028	-0.423949	-0.472541	-0.857033	-1.11748
ATAT1	-0.169109	0.228356	-0.140896	0	-0.603657	0.647044	-0.173163	0.799563	-0.00127697	-0.0782726	-0.136765	-0.615632	-0.350292	0.494606	-0.844072	0.168187	-0.546571
ATCAY	-0.357148	-0.651322	-0.593346	-0.231723	-0.197347	0.904796	0.797958	0.580237	1.25485	0.764459	0.626966	0.55153	0.0330946	-0.16554	0.202726	-0.193551	-0.489265
ATE1	-0.373018	0	-0.389133	0.139123	0.21957	-0.622239	-0.54768	-0.678376	-0.346088	-0.174506	-0.72144	1.52003	0.340637	0.174701	1.0549	0.563498	0.526844
ATF1	-0.100942	0.168716	0.107981	0.00849915	0.216121	-0.316181	-0.349806	-0.528861	-0.663694	-0.284397	0	-0.409004	0.3768	0.443979	-0.39677	1.00553	0.284009
ATF2	-0.203391	-0.0884528	-0.277635	-0.0186448	-0.0242417	0.287097	0.262188	0.196357	0.0405505	0.418875	-0.397111	0.387924	0.207737	-0.322842	-0.274534	0.00945234	-0.119662
ATF3	-0.385722	0.676544	-0.228655	-0.0892566	-0.393344	-0.765736	0.00931323	-0.644231	0.091523	-0.307307	0.77034	-0.162093	1.9273	2.03168	0.111962	3.81989	-0.0560839
ATF4	-0.0693226	-0.210853	-0.274244	-0.0744982	-0.42348	0	0.424811	-0.291603	0.0947494	0.535605	0.926563	-0.511676	1.89158	1.16114	0.0942459	1.26148	-0.0135021
ATF5	0.60296	0.171006	-0.263566	0.832917	-0.166677	0	0.194479	-0.0765448	0.343182	0.139528	0.153434	-0.459982	-0.306469	-0.240604	-0.241491	0.0885215	-0.611261
ATF6	-0.11973	-0.377364	-0.172093	-0.0977688	-0.37756	0.071744	0.179094	0.163954	0	0.0550737	0.663186	-0.249394	0.590529	0.16986	-0.256393	0.116752	-0.487793
ATF6B	1.0262	1.41552	1.52064	1.23334	0.798052	-0.701354	-1.72436	-0.714937	-1.06512	-0.155407	-2.65653	0	-0.0498533	0.419647	0.993138	-0.325623	0.304089
ATF7	0.581717	0.466329	-0.168656	-0.49933	-0.778801	-0.204716	0.712456	0.344601	-0.0344591	0.202666	0.0685177	0.295618	-0.538668	0.256411	-0.320357	0	-1.02031
ATF7IP	0.0981932	0.195495	-0.14635	0.212599	0.154141	-0.178347	-0.0248094	-0.0422549	0.168475	0.247167	-1.19684	0.479327	-0.721733	-0.725349	0.150912	-0.543195	-0.0646358
ATF7IP2	-0.402901	-0.192905	-0.885928	0.155293	-0.221428	0.217506	0.445276	0.592267	0.37321	0.122435	-0.417575	0	-0.411329	-0.0930176	-0.559309	0.43069	0.121133
ATG10	-0.161767	-0.72604	0.0928311	0.565993	0.100677	0.11277	0.147849	-0.332103	0.00490428	-0.472899	-0.110033	0.445683	-1.95508	-0.334864	0.0348909	-0.67552	0.248391
ATG12	0.101053	0.0189893	0.102229	-0.105858	0.15562	-0.0301583	-0.0653989	-0.654366	-0.590349	0	-0.357797	-0.571687	0.431626	0.0140898	-0.221991	0.37381	0.191701
ATG13	-0.333883	-0.189548	-0.137929	-0.205672	-0.312513	0.688413	0.819762	0.30158	0.0657992	0.238732	0.417937	0.298398	-0.432223	-0.193817	0.522236	0.16715	0.100399
ATG14	-0.125127	-0.16123	-0.124773	-0.300303	0.438504	0.625066	0.655012	0.512632	0	0.0862079	-0.458763	0.874692	0.26602	-0.588244	-0.558007	-0.797799	1.26961
ATG16L1	0.0239305	0.0133157	-0.113551	-0.0926917	-0.137983	0.488155	0.408669	0.638315	0.602074	0.147418	-0.0312669	-0.15647	0.0175173	-0.374284	0.0226226	-0.293839	-0.131673
ATG16L2	0.46135	0.596822	0.303705	0	-0.514555	0.419222	-0.639356	0.323679	0.627524	-0.640612	-1.385	-0.776285	0.176744	-0.694407	-0.430041	-0.438515	0.339556
ATG2A	-0.353119	-0.30713	-0.476421	-0.61292	-0.453838	-0.0124042	0.18324	0.195889	0.474956	-0.0917861	0.648373	0.0449636	-0.133728	-0.131375	0.205437	0.195901	-0.225252
ATG2B	0.114228	0.243972	-0.0226536	0.127808	0.041009	-0.137953	-0.0629625	-0.117903	-0.0635395	0.0499668	-0.606739	-0.0870085	-0.250846	0	0.0287457	0.218998	0.324613
ATG3	-0.192744	-0.269814	-0.150587	-0.155288	0.169168	0.0796156	0.468657	0.0663671	0.0925655	0.231403	1.13039	0.150456	-0.00358391	-0.191132	-0.192898	-0.281882	0
ATG4A	-0.546973	-0.441632	-0.379734	-0.334111	-0.175379	-0.239955	0.310496	0.0309343	-0.213614	0.311707	0.590489	0.0468607	0.19933	-0.0358229	0.217295	0.0542946	0
ATG4B	0.451749	0.365476	0.488039	0.311534	0.210461	-0.783336	-0.69571	-0.45834	-0.700432	-0.734566	-0.616996	-0.339374	0.290079	-0.0788279	0.00634289	0.129154	0.58348
ATG4C	0.889797	0.851768	0.654153	0.586682	0.454388	0.120666	-0.41224	-0.420326	-0.352253	-0.066212	-1.02655	0.528131	-0.452478	-0.956497	-0.0717649	-0.668888	0.164062
ATG4D	-0.701207	-0.807112	-0.560832	-0.641628	-0.178835	-0.5943	0.212944	-0.460787	-0.547385	0	0.133615	0.216175	0.213366	0.247968	0.777726	0.822215	0.726759
ATG5	0.028481	-0.0837679	-0.130519	-0.0122797	0.143724	0.0621634	-0.202574	-0.453269	-0.355488	-0.355434	-0.113796	-0.256858	0.192951	-0.0633776	0.0755835	0.0438462	0.154137
ATG7	0.604857	0.0317407	0.0913045	-0.0897691	0.0232468	0.616525	-0.045366	0.40875	0.411063	-0.0950177	-0.0604651	0.0482664	-0.287098	-0.181238	-0.422906	-0.118414	-0.239977
ATG9A	-0.972794	-0.855116	-0.601195	-0.83128	-0.446773	-0.17433	0.582585	-0.0614042	-0.219127	0.318489	0.936088	0.054028	0.10127	0.0813987	0.491422	0.900688	0.517275
ATG9B	-0.471178	-0.609331	-0.774361	-0.0182412	-0.186105	0.0636442	0.424274	0.204291	0.139532	0.603958	0.257344	0.0849171	-0.44628	-0.0268095	-0.190196	-0.47293	0.193407
ATHL1	0.888976	0.781863	0.16731	-0.582269	-0.722772	1.259	-0.304802	0.917114	0.809401	0.169382	-1.12126	-0.154732	-0.111701	-0.798638	-1.19169	-1.91663	-2.08067
ATIC	-0.0787029	-0.343525	-0.279428	-0.265986	0.144038	0	0.353769	0.0666628	-0.144977	-0.620306	0.403317	0.263884	-0.010252	-0.00938606	0.72432	0.0963469	0.485356
ATL1	0.379966	0.62408	0.486101	0	-0.230861	1.13498	0.200017	0.255164	-0.0250239	0.749747	-0.0813694	-0.20375	-1.16454	-0.884361	0.339499	-1.46325	-1.28411
ATL2	-0.736294	-0.391959	-0.233551	-0.474453	-0.67352	-0.294891	0.657015	0.00888332	0.140551	0.160565	-0.02316	0.549059	0.449899	0.330392	-0.229391	-0.100166	0.153566
ATL3	0.935813	0.334881	0.615416	0.428831	-0.119784	0	-0.316013	-0.0876989	-0.128505	-0.0852561	0.99687	-0.447987	0.856036	1.34293	-0.999103	0.964067	-0.652692
ATM	0.576509	0.685486	0.225562	0.38606	0.12204	0.418835	-0.531983	0.323284	-0.152035	-0.183809	-0.883963	0.177904	-0.682846	-0.925978	-0.35646	-0.53303	-0.186628
ATMIN	0.0549439	-0.194815	-0.00716746	0.0358269	0.179363	-0.67677	-0.256067	-0.507467	-0.437044	-0.433515	-0.503327	0.330752	-0.125751	0.118334	0.00300908	0.300914	0.181494
ATN1	-1.01054	-1.0018	-0.810079	-1.07556	-0.847003	0	0.777096	0.311722	0.362163	0.335758	1.11345	-0.26795	0.0370493	-0.133116	-0.17739	0.413173	0.0136375
ATOH1	1.59114	-0.590216	-0.482181	-0.0884833	-0.0922389	0.457572	0.948551	0.713864	0.666756	0.782096	0.758993	-0.0623479	-0.215882	0	0.371899	-0.0187025	-0.327853
ATOH7	0	-0.918314	-0.798056	1.12675	-0.419774	0.169384	0.5736	1.31171	0.291475	0.488929	0.403428	-0.538936	-0.650875	-0.431988	-0.0839534	1.20569	-0.517251
ATOH8	-0.21773	-0.270328	0.330873	-0.0355945	0.0507462	-0.39597	-0.184729	-0.123368	-0.159706	-0.423353	-0.923947	0.277186	-0.382411	0.228571	-0.301367	-0.481833	0.0741856
ATOX1	-0.0159302	-0.681424	-0.394745	-0.42077	-0.333795	-0.0324774	0.743426	0.335708	0.469342	0.442286	1.06413	0.0821075	-0.336633	0	0.2117	-0.170081	0.0518217
ATP10A	-0.304406	-0.0914381	0.384439	0.630107	0.902322	0.329122	-0.256359	0.486117	0.158507	-0.00864077	-0.170702	-0.877282	-0.441266	-0.0343077	-0.712671	-0.193227	-0.905519
ATP10B	-0.156387	0.463966	0.00926161	0.0239904	0.000451565	-0.19012	0.283264	0.163759	-0.0951564	0.112244	-0.0984671	0.117402	0.0189517	0.177246	0.297584	0.235884	-0.149374
ATP10D	0	0.702459	0.724511	0.299084	-0.687195	0.186349	0.71049	0.509075	0.808377	0.387186	-1.16847	-0.109288	-1.80778	-1.5775	-1.31701	-0.598621	-1.60045
ATP11A	-0.423916	-0.23636	-0.394812	-0.265237	0.427293	-0.452611	0.287421	0	-0.158012	-0.162232	0.408787	0.566765	1.17814	0.875464	-0.370283	0.583778	0.561017
ATP11B	-0.0687599	-0.0566549	0.294281	-0.0357084	-0.392568	0.714663	0.572935	0.53378	0.365572	0.322681	0	0.870872	-0.254449	-0.98061	-0.361521	-0.305042	0.0233755
ATP11C	0.319716	0.171832	0.221476	0.0616515	-0.682352	0.242494	-1.0213	-0.379033	-0.0151188	-0.660835	-0.266711	-0.385215	1.22116	0.699468	-1.37932	0.733035	-0.801335
ATP12A	0.1144	-0.229102	0.411356	0.400018	0.519159	-1.11466	0	-0.886277	-0.433053	-0.490829	-0.830802	0.876135	-0.190416	0.157343	-0.303363	0.332294	0.950287
ATP13A1	0.144899	-0.0285454	-0.0535803	-0.500107	-0.502392	0.627145	0.4494	0.58481	0.655007	0.333527	0.822681	-0.263912	-0.206684	0	-0.174233	0.194222	-0.040988
ATP13A2	0.428757	-0.260988	0.0745828	-0.188882	0.748208	-0.150253	-0.372257	-0.160476	-0.606812	-0.577144	0.308748	0.268793	0.369758	0.963689	0.527904	0.794484	0.336673
ATP13A3	-0.149173	-0.653878	-0.246929	0.738127	-0.354788	0.402284	-0.051034	-0.416612	0.58343	0.743637	0.689331	-0.154015	0	1.06223	0.166601	1.36385	-0.15093
ATP13A4	-0.156981	-0.487742	-0.341195	0.0059247	-0.000149	0.944539	1.02334	0.845315	0.71173	0.650851	0.843816	-0.0900416	-0.218583	-0.00736046	0.380949	0.0559316	-0.288495
ATP13A5	-0.284723	-0.645517	-0.55091	-0.161824	-0.182951	0.479235	0.888269	0.670701	0.588374	1.03979	2.40388	-0.0533962	-0.188394	0	0.392834	0.0216336	-0.315945
ATP1A1	-0.138255	0.140975	-0.379363	-0.387722	-0.126156	-0.920223	-0.164359	0.103699	0.41959	-0.395015	-0.127977	-0.216193	1.00472	1.15514	-0.108275	1.44239	-0.381579
ATP1A1OS	-0.801337	-0.373115	-0.257068	0.0393894	0.837633	0.227502	0.814118	0.435541	0.564147	0.605854	-1.9134	0.281054	-2.1625	-3.75768	-0.311889	-2.19537	0.442168
ATP1A2	-1.26114	-0.295778	-0.407762	0.150629	0.0336938	-0.173052	0.502945	0.479179	-0.0346441	0.134864	-0.0138564	0.352855	-0.72243	-0.86877	1.06378	-0.00215769	1.51982
ATP1A3	-0.697497	-1.33005	-0.787581	-0.602508	0.312285	-1.25564	0.960169	-0.290608	0.398757	0.372342	1.48463	0.293025	0.210929	-0.924598	-0.0420103	0	0.179666
ATP1A4	-0.330375	-0.695225	0.0257373	-0.0317478	0.254551	-0.626493	0.263036	-0.347876	-0.342731	-0.20712	0.850055	0	1.25901	1.38207	0.393754	1.78229	0.558866
ATP1B1	-0.594162	-0.953301	-0.617222	0	0.065937	-0.737727	0.403536	-0.530718	0.000589	-0.0175009	0.649929	-0.137015	0.284402	0.630615	-0.483612	0.438692	0.258244
ATP1B2	-0.23661	-0.287601	-0.412467	-0.670689	0.565832	0	-0.219671	0.442907	0.816076	0.296935	0.174905	0.596219	-0.462189	-1.32602	0.725686	-0.45641	0.132334
ATP1B3	0.214878	1.04041	-0.0409994	0.278125	-0.450197	-0.561193	-0.646737	-0.612823	-0.322625	-0.599341	0.981691	-1.47656	2.38231	3.10609	0.296954	2.25925	0
ATP1B4	-0.974381	2.87626	0.910867	-0.828121	1.88647	2.6997	1.61054	1.36662	0.630913	-0.0814457	0	-0.955586	-1.07455	-0.866502	5.13971	-0.890866	-1.18635
ATP2A1	-0.00125678	0.0662964	-0.165556	0.198133	-0.0611542	0.921646	0.836377	0.447955	0.758923	0.601576	0.709525	0.200238	-0.334315	0.430352	0.0507704	-0.179248	-0.638082
ATP2A2	-0.717676	-0.831865	-0.455933	-0.97599	0.393663	-0.657296	0.111847	-0.536179	-0.882127	-0.219456	0.987344	0.512374	1.21631	1.3492	1.70888	1.66302	1.03548
ATP2A3	1.09793	0.818794	0.555278	0.665461	-0.0334165	0.599013	-0.32021	0.372668	0.870316	-0.363063	-0.16705	-0.696421	-1.26916	-0.0253959	-0.527793	-0.189367	-0.577168
ATP2B1	0.422666	0.674205	0.321529	-0.24122	0.386343	-0.188313	-0.127497	-0.388376	-0.0586689	0.00889469	-0.462569	0.219362	-0.269041	0.070843	-0.314863	-0.553245	-0.0683277
ATP2B2	-0.124382	-0.773089	-0.559231	-0.14813	0.528242	0.517649	0.616035	0.416853	0.668811	0.371212	0.42479	0.370033	-0.520735	-0.173003	0.197851	0.693334	-0.649325
ATP2B3	-0.295477	-0.470998	-0.396952	-0.0572901	0.165861	-0.504145	-0.359403	-1.0415	-0.509298	-0.367928	-0.5605	0.796361	-0.220703	0.0188248	0.214707	0.14646	0.375876
ATP2B4	-0.248869	-0.191487	-0.105766	0.0409884	0.273023	-0.565462	-0.369413	-0.330361	-0.28534	-0.173127	0.756705	0.143291	0.309847	0.72082	0.243246	0.973567	0.380469
ATP2C1	-0.608931	-0.253189	-0.236918	0	-0.129081	0.634692	0.711515	0.53035	0.25114	0.615095	0.128088	0.14801	-0.416001	-1.09926	-0.0439577	-0.612306	0.448433
ATP2C2	-0.20725	-0.578418	-0.474464	-0.0790586	-0.0922518	0.41076	0.963491	0.732915	0.674661	0.688068	0.763902	0.380447	-0.21268	0	0.38179	-0.0170183	-0.321673
ATP4A	-0.179358	-0.176775	-0.435867	-0.047287	-0.0646348	0.431652	0.987196	0.780033	0.690272	0.699272	0.784432	0.00889015	-0.205045	0	0.390932	-0.00914335	-0.320645
ATP4B	-0.186392	-0.520712	-0.0707831	-0.0522079	-0.0319514	0.488038	0.999184	0.783282	0.68477	0.720371	0.769839	-0.0747323	-0.194845	0.703282	1.76872	0	-0.272515
ATP5A1	-0.357558	-0.543195	-0.323198	-0.257009	0.407651	-0.761266	0.55139	0	-0.0967512	0.153251	0.93	0.106413	-0.00751591	0.196128	-0.0127954	0.50393	0.395694
ATP5B	-0.604967	-0.445876	-0.341816	-0.210119	0.495189	-0.389743	0.775378	0	-0.0642233	-0.409954	1.07243	0.362061	0.0362797	0.428272	-0.0162296	0.67327	0.509291
ATP5C1	-0.911184	-1.09452	-0.717808	-0.594158	0.218697	-1.09719	0.353177	-0.414598	-0.628372	-0.05375	0.51653	0.0118341	0.0997477	0.502919	0	0.775639	0.876402
ATP5D	-1.26028	-1.49468	-1.22323	-1.09963	-0.558969	-0.453529	0.70697	0.0859156	-0.00318527	0.430643	1.02481	0.129615	-0.568517	0.0723619	0.0778723	0	0.0195274
ATP5E	-0.0736935	-0.159148	-0.196564	-0.0876939	-0.00462341	-0.243774	0.151993	-0.525617	-0.0830452	-0.171663	0.28815	-0.0239139	0.0641365	0.616484	0.0541513	0.214326	2.48707
ATP5F1	-0.515377	-0.463449	-0.587165	-0.250764	0.484056	-0.795531	0.0399456	-0.474135	-0.28993	-0.114025	0.524813	0.0783682	0.123228	0.329489	0	0.467004	0.436893
ATP5G1	-0.925037	-1.10615	-1.25959	-0.940154	0.444159	-0.714708	0.178839	-0.289434	-0.417752	-0.116296	1.61031	0.342509	0	0.840557	0.428831	0.862135	0.552212
ATP5G2	-1.12414	-1.01615	-0.76502	-0.727276	0.219406	-0.350747	0.346807	-0.10743	-0.17082	0.16009	1.08938	0.343303	0	0.634837	0.232465	0.439705	-0.0462227
ATP5G3	-0.423489	-0.645883	-0.707976	-0.26408	0.548222	-0.7026	0.28066	-0.100786	-0.214605	0.0937834	0.843185	-0.00402927	0.24143	0.727792	0	0.640724	0.421259
ATP5H	-0.524376	-1.02391	-0.63364	-0.275618	0.0831261	-0.549812	0.510526	0	-0.10851	0.540341	0.608474	0.040494	-0.110888	0.431712	-0.0540686	0.275515	0.32884
ATP5I	-0.39185	-0.692573	-0.61812	-0.479628	0.358944	-0.666841	0.314319	-0.0880375	-0.138059	0.266934	0.590493	0.142377	0	0.650268	-0.178608	0.555073	0.258835
ATP5J	-0.859055	-0.997975	-0.913156	-0.741386	0	-0.685563	0.365495	-0.197535	-0.479757	0.221997	0.579312	0.0033617	-0.0167141	0.23813	0.00352097	0.343203	0.213921
ATP5J2	-0.644103	-0.905402	-0.878962	-0.898363	0.0798383	-0.806059	0	-0.37212	-0.543148	0.132049	0.770309	-0.0360341	0.127447	0.473318	0.163538	0.554232	0.3991
ATP5L	-0.298447	-0.628057	-0.519563	-0.12093	0.119783	-0.383458	0.380792	0	-0.115532	0.525083	0.536441	-0.137959	0.0875263	0.419818	-0.129723	0.294886	0.357307
ATP5L2	-0.1195	-0.423696	-0.312189	0.0605621	0.211572	-0.710133	-0.282114	-0.539202	-0.653691	0.038708	-0.36342	-0.0133834	0.729784	0.273318	0.178493	0.261209	0.0519659
ATP5O	-0.495299	-0.773216	-0.756916	-0.282857	0.285035	-0.713577	0.407564	-0.262843	-0.38211	0	0.562031	-0.17948	0.0108976	0.526886	0.144095	0.541453	0.39412
ATP5S	-0.289188	-0.576066	-0.167424	0.526518	0.810184	-0.343996	0.818363	0.0617256	-0.0337381	0.398445	0.819888	-0.477639	-0.560318	0.185647	-0.620199	0.693428	0.376808
ATP5SL	-0.0933342	-0.292851	-0.143479	-0.117106	0.699773	-0.538145	0.0999336	-0.273327	0	-0.031435	0.613319	0.281111	0.69166	-0.179729	0.949879	0.367759	0.916266
ATP6	-1.00038	-1.0498	-0.964771	-1.18149	-0.257585	-0.584206	0.507872	0.189971	0.165755	0	0.315609	-0.384281	0.0419588	0.164829	0.123416	0.156188	-0.0209551
ATP6AP1	-0.0337791	-0.606968	-0.056488	-0.21564	-0.397741	-0.354661	0.140736	0	0.0679436	0.276191	0.359042	0.131825	-0.0819836	0.0166349	-0.125337	0.219257	0.0481901
ATP6AP1L	0.631003	0.344171	0.162157	-0.0436235	-0.155669	0.909976	-0.393467	0.151752	0.123466	-0.338599	-0.718937	0.526629	-0.792925	-0.852047	0.211966	0.069249	0.254459
ATP6AP2	0.853691	0.347992	0.59567	0.874724	0.101946	-0.1639	-0.125712	-0.0826797	-0.0216389	0.375905	-0.207962	-0.592377	-0.190295	0.140018	-0.459868	0.353777	0
ATP6V0A1	-0.418105	-0.479669	-0.467197	-0.538696	-0.58882	0.0551415	0.123573	-0.426157	0.449638	0.255892	0.785955	0	0.144235	0.0365009	0.266767	-0.462384	-0.918057
ATP6V0A4	-0.853347	0.815419	-0.351029	-0.868209	-0.999574	-0.768888	0	-0.498137	-0.135729	0.550467	-0.57813	0.414163	0.324914	0.659459	0.0931187	0.716755	0.0923262
ATP6V0B	-0.546901	-0.988191	-0.615284	-0.847758	-0.580067	-0.23436	0.472658	-0.222483	0.0252857	0.718845	0.988783	0.0702696	0	0.0341845	0.0237322	0.255876	-0.349592
ATP6V0C	-0.0237112	-0.514019	-0.0345631	-0.120648	-0.189897	-0.161044	0.303108	-0.150892	0	0.351378	0.758099	-0.200792	0.270412	0.74357	0.589041	0.613031	0.263345
ATP6V0D1	-0.884873	0.228435	0.0961852	0.179584	-0.136353	0.434637	0.112275	0.558396	0.521456	-0.320919	0.333659	-0.608586	0.566183	0.0412107	-0.0359154	0.364101	-0.188209
ATP6V0D2	-0.143492	-0.499008	-0.388849	0	-0.0171347	0.478221	2.40488	0.79768	0.717634	0.770017	0.820527	-0.0971637	-0.203117	-0.0154476	0.366775	-0.0410008	0.386276
ATP6V0E1	-0.295331	-0.302114	-0.280885	-0.0941906	-0.0252762	0	0.217398	-0.258284	-0.0569763	0.0296202	0.760653	-0.335456	0.326653	0.0833607	0.435242	0.461392	0.311244
ATP6V0E2	-0.628992	-0.399649	-0.127886	-0.641208	0.453942	0.0100203	0.706596	0	-0.317051	-0.42244	1.18698	1.23969	0.225924	0.471738	-0.0833569	-0.190471	0.415373
ATP6V1A	0.0727062	-0.465981	-0.266659	-0.113912	0.564634	-0.829219	-0.0564413	-0.370031	0	-0.212662	0.61394	-1.47539	0.664872	0.625516	0.451398	0.808781	1.02127
ATP6V1B1	-0.254169	-0.582952	0	-0.102018	-0.123769	0.463479	0.925045	0.752153	0.611892	0.744187	1.43501	-0.15288	0.346831	-0.0766296	0.310987	-0.0970664	-0.386655
ATP6V1B2	-0.000672	-0.103425	-0.143292	0.18111	-0.225388	0.655411	0.846488	0.585367	0.498945	0.209159	0.917982	0.129586	-0.0888538	-0.0862103	0	-0.347626	-0.125109
ATP6V1C1	0.182022	-0.0587821	0.103471	0.100339	0.0135288	-0.200694	0.00324488	-0.103041	-0.163617	-0.320306	0.165791	-0.296486	0.263392	-0.136214	-0.072144	0.160851	0.163399
ATP6V1C2	0.2774	-0.112054	0.029489	0.210239	0.0918112	-0.275399	0	-0.196114	-0.528597	0.18389	-0.612735	-0.85786	0.0679212	0.00605106	-0.532673	-0.0849609	0.104898
ATP6V1D	-0.316422	-0.190753	-0.164364	0.48665	0.434288	-0.732365	0.0603495	-0.257427	-0.0426064	0	0.696279	-0.0947008	0.862873	0.0907869	-0.122714	0.343928	0.49949
ATP6V1E1	-0.787149	-0.690552	-0.421039	-0.155672	-0.0664711	-0.0929098	0.901876	0.21089	0.0367851	0.22016	1.23594	0.0176706	-0.392302	0.315862	0	-0.0710764	0.260736
ATP6V1E2	-0.700031	-0.407744	0.202724	0.0648909	-0.137352	0.138003	-0.443405	0.153571	-0.0569611	0	0.250728	-1.44317	0.0527725	-0.717186	1.30251	-0.100676	0.457285
ATP6V1F	-0.613561	-0.866287	-0.74585	-0.747845	-0.49973	0.0476418	0.511624	-0.2431	0.261205	0.13417	1.09979	0	-0.511725	0.408582	0.110309	0.70646	-0.461066
ATP6V1G1	-0.325928	-0.402441	-0.36501	-0.116198	-0.160748	-0.245948	0.423618	-0.18323	0	0.300655	0.506123	-0.176457	0.286485	0.0814724	0.170568	0.00486565	0.0995789
ATP6V1G2	-0.125309	-0.0138783	-0.0172091	0.557637	0.279917	0.0223761	0.54527	0.24929	0.413187	0	0.14122	0.266231	-1.24757	-0.294267	-0.58098	-0.508922	-0.571073
ATP6V1G3	-0.262572	-0.630579	-0.524424	-0.133844	-0.147509	0.396753	2.00279	1.20706	0.603648	0.696217	0.697918	0.406062	-0.202785	-0.00211144	0.365817	0	-0.33423
ATP6V1H	-0.164765	-0.283817	0.0408621	0.115312	0.287154	-0.61613	0.102077	-0.498829	-0.563769	-0.673083	0	0.0948095	0.149532	-0.388713	0.0846119	-0.241194	0.435096
ATP7A	0.196483	0.274783	0.202814	0.508284	-0.0946373	-0.304237	-0.0520209	-0.00192965	-0.0336842	-0.394813	-1.00009	0.0692932	-0.139146	-0.1145	0.0486833	-0.126374	-0.166945
ATP7B	-0.225625	-0.0039444	-0.0333481	0	0.238647	0.343386	0.997505	1.45479	0.752873	0.81432	-0.24764	0.283672	-0.322559	-0.359773	-0.444889	-0.716263	0.105607
ATP8	-0.582906	-0.148251	0	0.191934	0.519761	-0.518845	-0.301071	-0.0826063	0.0759115	-0.00279617	-0.25652	-0.478472	0.415862	0.467291	0.465396	0.548745	0.191821
ATP8A1	0.686088	-0.0325241	0.0465584	0.246562	0.114157	0.345426	-0.246544	0	0.269586	-0.030879	-0.629366	0.133559	-0.0186319	-0.771501	-0.0586634	-0.574539	0.144643
ATP8A2	0.715027	0.77473	-0.571498	-1.30133	-1.30322	0.0877496	-0.0326796	-0.239612	-0.033604	0.31008	1.13041	0.183189	1.49884	1.20015	2.99093	-0.511719	0.718949
ATP8B1	-0.297974	0.462027	0	0.0735998	0.152747	-0.319268	-0.672934	-1.1643	-0.0476065	-0.213484	0.835375	-0.563528	0.163029	0.792829	-1.11718	0.241636	0.172009
ATP8B2	0.58072	1.00183	0.934104	0.854873	-0.383865	0	0.141545	-0.0890942	1.56074	0.144209	-2.07978	-0.647892	-1.14353	-1.52517	0.100635	-0.906932	-0.780258
ATP8B3	0.202923	-0.443324	0.313787	0.32446	-0.1944	0.459062	0.223753	0.714008	0.581384	1.02524	0.191984	-0.0586681	-0.107302	-1.27182	0.0369389	-0.832086	-0.932446
ATP8B4	1.32853	1.75693	0.869899	0.0916338	0.60498	0.810321	-0.8191	0	-1.37713	-1.12318	0.35595	-1.14334	1.51911	-0.46672	-1.16477	-0.188696	-2.76247
ATP8B5P	-0.10323	0.0783703	-0.24985	0.123373	0.307032	2.1692	0.149682	-0.0167573	-0.237909	0.259316	-0.0687041	0.26834	0.0863113	0.126427	0.185567	0.0700941	0.193808
ATP9A	-0.287629	0.0163379	0.179049	0.0721545	-0.102517	-0.426034	0.157435	-0.530229	-0.240585	0.956605	0.291255	-0.362709	0.421512	-0.269234	0.641309	-0.0410125	0.801324
ATP9B	-0.270496	0.112513	-0.325602	-0.311445	-0.444325	0.341075	0.346725	0.223502	-0.0874839	0.108637	-0.0590158	0.0258553	-0.491946	0.234621	0.197696	-0.201852	-0.400598
ATPAF1	-0.888033	-0.619931	-0.753422	-0.879275	-0.141246	-0.0381212	0.395968	0	0.217724	0.144707	0.466259	0.292698	-1.14383	-0.457429	0.245646	0.163597	0.176176
ATPAF1-AS1	0.232521	-0.198097	-0.742611	-0.314559	-1.00176	1.55766	0.868985	1.4301	1.57648	-0.269453	0.617937	0.404668	-0.575875	-0.106219	0	-1.28187	0.48286
ATPAF2	-0.913154	-0.925663	-0.694335	-0.75093	-0.307179	0	0.636964	0.124884	0.0524139	0.20403	0.251175	0.23588	-0.397309	-1.31115	0.0982561	-0.827418	0.225711
ATPBD4	-0.23597	-0.167557	0.13111	0.130238	0.0189283	-0.62914	0.243546	-0.158084	-0.0670016	0.646015	0.434808	0.526768	-1.26289	0.654751	-0.698995	-0.783285	0.0694795
ATPIF1	-0.167559	-0.461853	-0.45723	0.00351858	0.358908	-0.117178	0.514807	0.267796	0.298021	0.088501	0.524893	0.136979	-0.290401	-0.00802231	-0.136889	-0.415719	0.222132
ATR	0.204191	0.195992	-0.0494871	0.258571	-0.404237	0.101154	-0.133513	0.156824	0.330208	0.340309	-0.0560365	0.11242	-0.0313227	-0.402551	-0.155311	-0.540922	-0.21859
ATRIP	-0.305441	-0.151607	0.152659	-0.21878	-0.0532377	0.498061	0.44544	0.0462224	-0.0677011	0.138873	0.540987	0.428955	-0.181472	-0.0074296	0.0682826	-0.325398	0.0775998
ATRN	-0.265735	-0.486112	-0.240699	-0.422308	-0.054307	0.199802	0.421804	0.00696468	0	0.693786	0.702602	0.510133	-0.360096	0.354013	-0.304088	0.127505	-0.0295286
ATRNL1	0.342924	-0.489265	-0.395583	-0.0796564	0.0994091	-0.23861	-0.473834	0.0233312	-1.12563	1.07054	-1.04556	1.04405	-0.587128	-0.31171	-0.686957	-0.487654	0.763714
ATRX	-0.103338	0.134005	0.136098	0.140595	0.343461	0.190888	-0.741637	-0.22133	-0.151725	-0.250983	-0.537634	0.223606	-0.100458	0.26839	-0.0865029	-0.0731922	0.0737668
ATXN1	0.0114045	-0.0677528	0.144489	-0.0758939	-0.112462	-0.0402714	-0.106477	0.241213	0.361206	0.365136	-0.386083	0.0338106	0.241136	-0.363178	0.00257714	-0.602288	-0.0840872
ATXN10	-0.143402	-0.132856	-0.0505827	0.0957381	0.172524	-0.3181	-0.136521	-0.0802085	-0.28311	-0.148279	-0.452567	0.168344	-0.255983	-0.0598669	-0.0143835	-0.181233	0.0689224
ATXN1L	-0.773217	0.517825	0.139195	0.290333	-0.184633	0.074975	0.0646348	-0.0100903	-0.0562868	0.218345	-0.354723	-1.00972	-0.380059	0.120931	-0.0636992	-0.245861	0.744392
ATXN2	-0.389021	0.225487	-0.2417	-0.18447	-0.20531	0.348465	0.0960755	0.620188	-0.426022	-0.233568	-0.749927	-0.555487	0.161322	0.279265	0.204504	0.0518305	0.0981276
ATXN2L	-0.0769451	0.028985	-0.239348	0.0186454	0.120903	-0.325445	-0.543812	-0.198943	-0.00211795	-0.470593	-0.469659	0.108072	0.759969	0.208505	0.258204	0.400711	0.0410765
ATXN3	0.180408	0.226228	0.184946	0.232069	-0.204039	0.20449	-0.252191	0.0866733	0.329446	0.30851	-0.830358	0.464018	-1.04197	-0.312178	-0.878135	-0.803767	-0.656216
ATXN3L	-0.241938	-0.0777183	-0.315468	-0.142509	-0.224287	0.316428	0.797247	0.775124	0.512426	0.663522	0.615204	-0.281427	0.517604	-0.198768	0.176088	-0.222122	-0.526097
ATXN7	0.0101724	0.0986481	0.26952	0	0.0416226	-0.0579309	-0.0693331	0.051909	-0.47948	-0.721175	-0.243594	-0.221256	0.811638	0.268609	-0.0390339	0.695311	-0.00393915
ATXN7L1	0.313375	0.197677	0.300171	0.0767959	-0.248109	0.961867	-0.28912	0.488847	0.233729	0.475895	0.0949745	-0.106519	-0.954449	-0.40512	-0.69727	-1.08657	-0.527561
ATXN7L2	-0.467404	-0.640086	0.0492439	-0.349208	0.151275	-1.66034	-0.363287	-0.707191	-0.549801	-0.536471	0	0.912773	0.507335	0.465265	0.71832	2.21355	1.31521
ATXN7L3	-0.273992	-0.516755	-0.530555	-0.505121	-0.303347	0.292067	0.560771	0.143304	0.210486	-0.1019	0.654163	-0.0699739	0.169865	0.282935	-0.101568	0.120251	0
ATXN7L3B	0.39528	-0.398541	-0.375087	-0.296055	0	-0.298505	0.411715	0.25792	-0.014636	0.830006	0.443821	0.386626	0.158597	-0.187207	-0.286179	-0.46855	0.0193386
ATXN8	0	-0.0722108	-0.0347633	0.250365	0.191435	-1.77607	-1.27079	-1.05927	-1.7588	-1.20486	-2.24641	0.234084	0.0242915	0.161376	0.0608077	0.285259	0.166451
ATXN8OS	-0.147905	-0.307958	-0.414328	-0.015008	0.00962448	0.591663	1.03562	0.815279	0.751464	0.821903	0.848051	-0.08674	-0.215989	0	0.375176	-0.017149	-0.314324
AUH	-0.39863	-0.37612	-0.562801	-0.123515	0.550649	-0.340716	0.194711	0	-0.0166235	-0.139481	0.534144	0.332038	0.222867	0.19238	-0.331791	0.0873013	0.218707
AUP1	-0.254783	-0.39014	-0.328743	-0.639705	-0.413709	0.122318	0.390306	0.14945	-0.023098	-0.271071	0.727181	-0.373257	0.000862	0.0946693	0.106115	0.431591	0
AURKA	-0.693099	-0.946924	-0.896761	-0.45052	0.0708857	-0.505679	-0.602312	-0.230964	0	-0.291666	0.888681	0.145821	1.68017	0.974004	0.161958	0.721015	0.150564
AURKAIP1	-0.985839	-1.21092	-1.08586	-0.95903	-0.308838	-0.456671	0.168122	0.146538	0.0689344	0.428928	0.804336	0.0880022	-0.473556	0	-0.197057	0.157668	0.153993
AURKAPS1	0.044858	0.256682	-0.351303	0.0691862	-0.365584	-0.00470161	-0.104362	0.300925	0.639479	-0.436103	-1.35795	0	0.653442	0.467598	-0.166966	0.12659	-0.772743
AURKB	0.0294638	-0.504865	-1.00233	-0.0970712	-0.21493	0	0.551959	0.462057	0.536233	0.41573	0.227385	1.08726	-0.7476	-0.432721	-0.179019	-0.174639	0.0153236
AURKC	-0.951975	0.363933	-0.409739	-1.27099	0.0773292	-0.0223417	0.227961	-0.12819	0.28821	0	0.390713	1.08303	-1.29821	1.52456	0.0438662	-0.0718293	-0.625021
AUTS2	-0.172533	0.328225	-0.486949	0.0486828	0.249823	-0.0136417	-0.438894	0.280995	0.313597	-0.319238	0.0908319	0.252557	-0.0181886	-0.157064	0.403208	0.311611	-0.414627
AVEN	-0.865756	-0.553898	-0.359398	-0.548275	-0.434768	0.0866356	0	-0.449184	-0.51517	-0.00309086	0.873462	0.0650044	1.0283	0.774911	0.979273	0.735658	1.18578
AVIL	0.240557	1.60916	0.452651	0.312286	-0.267308	1.64311	0	1.54259	1.25931	-0.0172844	-2.1998	-0.147311	-0.165975	-1.10756	-0.339477	0.308657	-0.675022
AVL9	-0.216183	0.0230203	-0.237016	-0.0430803	0.160603	-0.655949	-0.116979	-0.834531	-0.32016	-0.359557	0.358463	0.00442696	1.04174	0.349422	0.0651209	0.479758	0.12804
AVP	0.304861	0	0.59898	0.272868	0.21271	-2.33322	-1.55626	-1.01432	-0.965508	0.173712	-1.40193	0.907655	-0.0518756	-0.362655	-0.0788293	0.314861	0.580728
AVPI1	-0.611078	-0.561219	-0.615171	-0.972841	-0.624861	0	0.727364	0.402312	0.0776482	0.667102	0.754442	0.168146	-0.0801282	0.510271	0.446207	-0.678009	-0.115023
AVPR1A	0.396317	0.547883	1.50173	-0.074604	0	0.669405	-0.117548	0.291771	0.207232	1.28343	-0.28859	1.44118	-1.07374	-1.75736	-0.802886	-0.412919	-1.07589
AVPR1B	-0.0245771	-0.610968	-0.499925	-0.129345	-0.104649	0.477897	0.923526	0.685216	0.636407	0.733849	0.731626	0.456734	-0.208054	0	0.360242	-0.0127349	-0.31541
AVPR2	-0.981342	-0.235001	0	-0.857742	0.156556	0.392101	-0.0234413	0.399043	-0.0507584	0.238161	0.626703	0.850644	-0.666104	0.247491	-1.02064	0.230999	-0.220899
AWAT1	-0.253259	-0.621951	-0.479626	-0.133142	-0.138677	0.4764	0.934684	0.697353	0.646755	0.593434	0.725131	-0.0456567	-0.201393	0	0.383633	0.00147009	-0.319935
AWAT2	-0.297078	0	-0.520991	-0.154502	-0.167861	0.378459	0.862165	0.6875	0.577789	0.532872	0.671329	-0.266241	-0.413449	-0.208671	0.160033	0.0395818	-0.522652
AXDND1	-0.145023	1.08477	-0.38721	0	-0.0253487	0.454074	1.01356	0.816276	0.713993	0.685809	0.814592	-0.10456	-0.232583	-0.0263453	0.36843	-0.0454755	-0.338558
AXIN1	-0.33544	-0.274472	-0.297753	-0.853109	-0.712198	0.374542	0.260679	0.184999	-0.109961	0.128042	0.629363	-0.389184	0.408965	0	-0.539144	0.554711	0.0198631
AXIN2	-0.241668	-0.0651546	-0.182552	0.232637	-0.10803	0.387871	0.400623	0.191454	0.0234246	0.757342	-2.24755	0.300554	-1.14817	0.306499	1.59646	-0.469452	0.400617
AXL	-0.386412	0	0.105695	-0.425381	-0.450281	0.388017	-0.107996	-0.317102	-0.262794	0.0743628	1.16356	-0.34789	0.26503	0.528556	0.122435	0.585194	-0.669405
AZFP	-0.196537	0.0982375	-0.46303	-0.0648875	-0.0435238	0.537549	2.35489	0.768064	1.08776	0.794301	0.794175	-0.115769	-0.244156	0	1.46702	-0.0452857	-0.351897
AZGP1	-0.630375	-1.52153	-1.16636	-0.68544	-1.41869	0.291076	1.6459	-0.410101	1.13162	1.42066	0.685322	0.804414	0.596883	-0.53439	-0.367596	0	1.08284
AZGP1P1	-1.10047	-1.44064	-0.845229	-0.97821	-0.918191	1.26184	0.0792637	1.3608	0.0282273	0.845399	1.40431	0.0691819	-1.05187	-0.84106	0.33629	-0.873066	0
AZI1	-0.0133276	-0.12254	-0.226407	-0.25638	-0.00681591	0.267732	0.611782	0.634866	0.32305	0.792932	0.651063	0.531212	-0.118362	-0.413448	-0.29371	0	0.669536
AZI2	-0.0123258	0.167805	0.330204	0.246932	0.189617	-0.132741	0.0240869	-0.280748	-0.410755	-0.281527	-0.165971	0.280593	-0.0276589	0.114745	0.173011	-0.415973	0.15907
AZIN1	-0.244203	0.0430822	0.253739	0.22719	-0.146455	-0.383995	0	0.261805	-0.183112	0.257806	0.94192	-0.150789	-0.610705	0.528379	0.399056	-0.815229	-0.109072
AZU1	0.367133	-0.040235	-0.13347	-0.219781	-0.147344	0.70622	0.691566	1.11692	0.332952	0.288594	0.434752	-0.453679	-0.550487	-0.356001	0	-0.020864	0.555606
B2M	1.01188	0.552554	1.09727	0.608204	0.155382	0.288939	0	0.599733	0.729244	-1.13408	-0.567921	-1.19637	-0.38573	-0.144611	-1.00278	-0.144217	-0.674033
B3GALNT1	-0.30365	-0.836274	-0.130378	-0.246605	0	0.485827	1.07924	0.641224	0.354502	0.67984	0.582902	0.677465	-0.543157	-0.295758	-0.0926657	-0.751013	0.0596275
B3GALNT2	-0.472247	0.183111	-0.484804	0.128545	-0.118696	-0.0877569	-0.188026	0.488781	-0.0123711	0.185888	-0.417372	0.350918	-0.217865	-0.24237	0.49212	0.26805	0.421789
B3GALT1	-0.217238	-0.56337	-0.456582	-0.0994706	-0.0779514	0.562437	0.955273	0.75422	0.724957	0.732866	0.79172	0	-0.160096	0.337652	0.347233	-0.0418391	-0.286455
B3GALT2	0.530764	-0.479719	0	-0.110176	1.16212	-0.706502	-0.013073	0.501339	-0.0687332	1.13189	-0.974926	0.630763	-0.154394	-0.26819	0.40535	0.0163403	1.29767
B3GALT4	0.298461	0.00325203	0.332675	-0.130623	-0.118796	0.141747	-0.277114	-0.413016	-0.0223131	0.114887	0.19379	-0.710322	-0.372269	0.131328	1.11723	-0.28652	0
B3GALT5	-0.219401	-0.591112	-0.484799	-0.116889	0	0.500296	0.92841	0.707705	0.630443	0.724292	0.713654	-0.131455	-0.251258	0.0329943	0.381486	-0.0565886	-0.343217
B3GALT6	-0.10825	-0.193378	-0.0926533	-0.152958	0.160605	-0.509936	-0.0609493	-0.449532	0.0798588	0	0.598282	0.342429	0.153925	0.762035	0.0646677	0.829843	-0.185328
B3GALTL	0.283536	0.00985909	0	-0.8306	1.77222	-0.292039	-0.46949	0.516816	-0.133424	-0.08325	-1.97226	1.05683	-0.201278	0.269657	0.13655	0.144574	-0.629825
B3GAT1	2.67254	2.19527	2.13675	1.87938	0.928487	1.53749	-1.11101	3.24179	1.77128	-0.219754	-1.30727	-2.09246	-0.292302	-2.02129	0	-1.13303	-1.56959
B3GAT2	-0.548526	-1.17546	-0.657712	-0.0450554	0.0969205	-0.338839	0.364558	0.40101	0.686679	0.280006	0.717786	0	0.116529	-1.22694	-0.129989	-0.363406	0.416343
B3GAT3	0.00123596	-0.323476	-0.333926	-0.386475	-0.66795	0.305406	0.329068	0.253701	0.495804	0.133586	0.324647	-0.345022	0	0.0857639	-0.291015	-0.329639	-0.628233
B3GNT1	-0.124927	-0.552621	-0.0752306	-0.152451	0.159395	-0.237253	0.502517	0	-0.0860786	0.652005	0.202987	0.516329	0.305421	-0.744592	0.576782	-0.573139	0.8188
B3GNT2	-0.185755	0.0826635	-0.191729	0.131385	-0.210595	-0.221673	-0.217397	0.226848	-0.250067	0.00518417	0.00192547	0	0.0216255	0.504783	-0.369512	-0.298341	0.323685
B3GNT3	1.65962	1.86597	0.949952	-0.769421	-0.168497	0.323786	0.285663	0.0728779	0	1.25765	2.34323	-0.3971	-0.78704	-0.597832	-0.200394	-0.270674	-0.642884
B3GNT4	-0.699725	0.393694	0.100368	-0.760427	-0.762323	-0.266435	0.281698	0.0406218	0	0.109699	0.0924616	-0.66709	0.340739	-0.662327	-0.288418	0.103963	-0.990128
B3GNT5	-0.600963	0.36685	0.177049	0.081799	0	-0.843616	-0.452477	-0.353143	0.267726	-1.31353	0.106352	-0.307032	2.45339	1.36141	-1.03908	1.1924	-0.802231
B3GNT6	-0.198905	-0.649801	-0.550303	-0.16046	-0.174665	0.51071	0.898868	0.671793	0.604533	0.586555	0.686475	-0.050323	-0.188686	0	0.393748	0.0211868	-0.314444
B3GNT7	-0.0688689	-0.549733	0.359167	-0.350393	0.0502341	-0.635282	-0.451242	-0.95486	-0.585304	-0.604802	-0.747319	0.143216	1.01406	0.438646	0.392358	0.235801	-0.0425696
B3GNT8	-0.26246	0.189385	0.0281115	-0.22734	1.1949	-0.804402	-0.329708	-0.492548	-0.126567	0	1.22411	0.459126	0.324182	0.295577	-0.827368	-0.772211	0.984262
B3GNT9	-0.345697	-0.277997	0	0.179135	-0.940864	0.907738	0.949993	0.343316	0.182199	0.633165	-0.123784	-0.407557	-1.14339	-0.97802	0.0466247	-0.819065	0.260653
B3GNTL1	0.0846682	-0.345971	-0.21466	-0.385279	0	0.461039	0.912381	0.24416	-0.196037	0.62181	0.688983	0.547094	-0.3441	-0.962582	-0.72353	-2.35821	0.263329
B4GALNT1	-0.144875	0.401746	0.483156	-0.225098	-0.157591	0	1.03121	-0.0586681	0.346352	1.06335	0.0407267	-0.265942	-0.399512	0.0529108	0.38309	-1.23498	-0.507522
B4GALNT2	0.318769	0.0308952	-0.502028	-0.365512	-0.0473256	-0.4549	0.120372	0.0950756	0	0.475061	1.00683	-0.133302	0.773489	-0.0543251	0.868012	-0.00444698	-0.276906
B4GALNT3	-0.946368	-0.81338	-0.384336	-0.519729	0.274538	-0.251942	-0.12919	-0.218103	0.0426698	-0.281048	0.0824397	0.766586	0.41797	-0.106422	0.226395	-0.297201	0.171441
B4GALNT4	-0.503668	-0.884003	-0.775558	-0.377371	-0.35958	0.600215	0.661205	1.43393	0.382088	0.694072	0.486863	-0.382856	1.77446	-0.298843	0.405612	0	-0.63733
B4GALT1	0.129484	-0.198814	0.0878229	-0.0898142	-0.266825	0	0.544219	0.656085	0.47919	-0.0344963	0.115171	-0.0142965	1.39128	0.774324	-0.907473	-0.016439	-0.75015
B4GALT2	-0.327499	-0.343776	-0.28136	-0.0130043	0.0153179	0.0499353	-0.082571	-0.460621	0.0949488	0.378852	0.566005	-0.257901	0.222818	0.310889	0.0931034	0	-0.33499
B4GALT3	-0.326954	-0.378881	-0.512888	-0.598726	-0.473452	-0.139129	0.399926	0.110157	0.144804	-0.132588	0.45337	0.0136304	0.690103	-0.274504	0.0717416	0.172499	0.225195
B4GALT4	-0.0527825	0.276744	0.290841	-0.200653	0	0.154874	-0.462992	-0.0721598	-0.299463	-0.107706	-0.0220227	-0.250058	1.24087	0.748327	0.396884	1.08466	0.450321
B4GALT5	-0.318938	-0.0226994	-0.587078	0.0971918	-0.16533	-0.0198488	-0.448692	0	0.768055	0.148824	0.269642	-0.232769	0.925422	0.331532	0.643592	1.10705	-0.131501
B4GALT6	-1.16598	-0.188928	0.0214086	-0.698575	0.619597	-0.458678	0	-0.234467	-0.296471	-0.137867	-0.180706	0.0911975	1.3852	0.533678	1.401	1.1082	1.43448
B4GALT7	-0.177918	-0.359424	0.064393	-0.269406	-0.00239181	-0.045434	0.228883	0.0790448	0.00882101	-0.0676651	0.839243	0	-0.331814	0.274934	0.200504	0.0908279	-0.0879531
B7H6	-0.0633168	-0.00327873	0.197879	0.629031	0	0.309922	0.772995	0.362841	0.62769	-0.124454	-1.03947	0.491805	0.667742	-0.389565	-0.361681	-0.705409	-0.687596
B9D1	-0.327815	-0.356282	-0.446963	0.10391	-0.248055	0.347701	0.933	0.247765	0.119929	1.04967	0.66767	0.118257	-1.23149	-0.218025	0.229217	-0.979041	-0.268801
B9D2	-0.275085	-0.46945	-0.0377884	-0.350942	-0.26981	0.209554	-0.248663	0.178274	0.296362	0.333009	0.417343	-0.460441	0.369821	0	0.0660534	0.312175	-0.24445
BAALC	-0.108334	0.3761	0.442691	-0.22855	0.49745	-0.515612	-0.723574	-0.114149	-0.447407	-0.782668	0.0368681	0.33025	0.0584211	0.191637	-0.0354642	0.23812	-0.251381
BAAT	-0.154369	-0.508119	-0.396083	-0.0141773	0	0.593047	1.0116	0.799692	0.723802	0.852036	2.0108	-0.104617	0.0692701	-0.00372505	0.347514	-0.0293889	-0.327566
BABAM1	-0.522594	-0.944357	-0.635197	-0.790441	-0.425957	0.528696	0.816723	0.482698	0.527826	0.236568	0.961535	0.464423	-0.686544	-0.374788	0.086278	-0.314654	0
BACE1	-0.287413	0.0605106	0.0125705	0.15357	0.0760722	-0.139366	-0.0364292	0.074144	-0.133333	-0.0818497	-0.0161212	-0.218864	-0.333611	-0.35657	0.0516623	0.144928	0.164899
BACE2	0.187761	0.151605	0.101383	0.136571	-0.218086	-0.0513668	-0.25489	-0.373332	0.22458	0	0.664167	-0.503868	0.755259	0.209675	-0.406758	-0.512571	-0.972899
BACH1	-0.403105	-0.142935	-0.398569	0	-0.636077	0.271403	0.240842	0.220718	0.649332	0.160944	-0.0547263	-0.119498	0.769199	-0.158704	-0.911484	0.86229	-0.331593
BACH2	-0.373468	0.597579	0.300827	0.353237	0.0494704	0.228676	0.380319	0.311071	0.271558	-0.407761	-0.870279	0.418878	0.271951	-1.22258	-0.951553	-1.51491	-1.31328
BAD	-0.433214	-0.959738	-0.628904	-0.592841	-0.500002	0.435866	0.574513	0.594724	-0.0535684	0.664489	0.983459	0.133996	-0.111822	-0.0304215	0.461237	0.00945926	0.352438
BAG1	-0.959531	-0.640507	-0.827555	-0.683673	-0.0583569	-0.573129	0.168945	-0.747422	-0.520936	-0.315932	0.643829	0.388783	0.628442	0.720031	0.782901	1.07026	0.607005
BAG2	-0.493206	-0.452626	-0.177967	0	-0.142784	-0.311813	0.20501	-0.533124	-0.692797	0.308236	0.931716	-0.326159	0.844056	0.626194	0.120141	0.65323	0.944512
BAG3	-1.00187	-0.237893	-0.43361	-0.049078	0	-0.502021	0.305703	-0.460907	-0.536209	-0.200992	0.391109	0.174125	1.0683	0.749127	0.208771	1.16113	0.757027
BAG4	0.285335	0.0985148	0.101294	0.222269	0.463014	-0.281853	-0.305972	-0.227185	-0.201966	-0.253479	-0.679746	0.233655	0.439605	-0.0112612	0.202417	-0.186437	0.138896
BAG5	0.105134	-0.0569935	0.297212	0.132241	0.177162	-0.242785	-0.0209351	-0.310946	-0.171109	0.0517969	0.374427	-0.141175	-0.107736	0.237391	-0.131133	0.0562153	0
BAG6	-0.618762	-0.99891	-0.818735	-0.610503	-0.3207	-0.191285	0.618341	0.0133162	0.339263	0.254266	1.11582	0.0675015	-0.0985169	0.269372	-0.100803	0.304247	0.180135
BAGE	0.28645	0.109825	0.112916	0.43846	-0.481348	0.10699	0.489259	0.014226	0.0194192	-0.396033	-1.38201	0.526959	-0.210622	-0.166046	0.0782976	0.382993	-0.107477
BAGE4	0.262071	0.338734	0	0.38102	0.0509515	-1.15343	-1.15678	-0.321777	-0.687654	-0.405758	-2.17077	0.561323	0.0243812	-0.0785336	0.236359	-0.181809	0.28418
BAHCC1	-0.372119	0.181606	-0.206002	-0.35411	-0.216705	0.106956	0.0201941	0.12325	0.334051	0	-0.0912957	-0.596525	0.156882	0.274223	-0.0380259	0.700696	-0.0348592
BAHD1	-0.240401	-0.305667	-0.124034	-0.385363	-0.437408	-0.0257673	0.291116	-0.0198088	-0.00205898	0.252795	0.50607	0	0.742322	0.283275	0.165586	0.448418	0.141158
BAI1	0.480459	0.240747	0.152407	0.22751	-0.49986	0.349554	-0.114372	1.02527	0.367625	0	-0.598555	0.591175	-0.646122	-1.05812	-0.0623512	-0.790179	-0.00134468
BAI2	-0.747518	-0.771441	-0.504726	0.123954	-0.553924	0.12014	0.492415	0.275908	0.336361	1.24674	0.965551	-0.0840197	-0.444248	-1.12202	1.9479	-0.27002	0.101764
BAI3	-0.0911851	-0.409421	-0.0568919	-0.249895	-0.0185766	-0.151312	0.0424256	0.671862	0.299745	0.184799	0.485567	0	0.466984	-0.134086	0.271674	0.165836	-0.884429
BAIAP2	-0.678525	0.127502	0.754212	-0.0997367	-0.651101	0.389827	0.69116	2.00754	-0.114916	0.131445	-0.982572	0.113814	-0.795266	0.21244	0.344839	-1.31795	-0.307031
BAIAP2L1	0.483599	-0.472152	-0.594371	-0.626483	-0.306221	0.0419793	0.0311253	1.00232	-0.0162683	0.563092	0.167774	0.115731	1.24098	-0.333675	-0.0682569	-0.257536	-0.00618268
BAIAP2L2	0.104456	-0.125656	-0.448829	-0.0737977	-0.259593	0.361923	0.0475094	0.284904	0.400421	0.35543	-0.27753	0.14368	-0.608865	-0.275939	0.301347	-0.350969	-0.236353
BAIAP3	-1.21426	0.172308	0.469341	-0.672148	-0.0760694	0.743914	6.19346	0.89593	0.353201	0.509692	-0.762275	0.388556	-0.91569	-1.00324	-0.561955	0	-0.785415
BAK1	-0.0466471	-0.393269	-0.487041	-0.35497	0	0.443153	0.677277	0.643938	0.44068	0.642239	1.35925	0.262043	0.527913	-0.00028	-0.161019	-0.313394	-0.022109
BAMBI	0	0.529012	-0.226754	0.237537	-0.396467	0.00335026	-0.131042	0.249372	0.195679	0.312675	-0.450217	-0.795787	-0.401966	1.07661	0.504807	-0.847739	-0.429092
BANF1	-0.756684	-1.03666	-0.7444	-0.76749	-0.401268	0.23735	1.09506	0.496491	0.30447	0.518977	1.28285	0.296182	-0.483454	-0.455172	0	-0.873436	0.0190964
BANF2	-0.502114	-0.837814	-0.712406	-0.358938	2.22109	0.243493	0.64267	0.459464	0.348331	0.49363	0.477229	-0.422521	-0.540444	-0.319712	0	0.445985	-0.650687
BANK1	4.38156	2.91252	1.42637	2.83033	-0.0562749	1.2131	0	0.572718	0.24752	-0.177434	-0.20786	-1.06096	-0.914103	-0.873683	1.00367	-0.514997	-0.986685
BANP	-0.424616	-0.156588	-0.839188	-0.453635	-0.550381	0.355271	0.265065	0.0949378	0.552706	0.268181	0.222703	-0.0669374	0.406825	-0.147194	-0.168873	0.459232	0.0576725
BAP1	-0.614347	-0.46557	-0.419851	-0.576973	-0.17736	-0.0268364	0.46911	0.119826	-0.329762	-0.305124	0.920038	0.225014	0.0341339	0	0.313378	0.306144	0.465394
BARD1	0.219944	-0.455288	0.367142	-0.156566	-0.309842	0.20657	-0.396737	0	-0.223515	0.389988	0.589656	0.752899	-0.0291491	0.052557	-0.0106583	0.426735	-0.616069
BARHL1	-0.815438	-1.21965	-1.10099	0.366398	-0.716863	-0.131715	0.278044	0.0578041	0	0.272985	0.109683	-0.801877	1.42792	0.879524	-0.350356	0.137089	-0.383626
BARHL2	-0.28797	-0.579742	-0.254418	-0.165068	-0.13158	3.18101	2.12253	1.3276	1.89444	1.20803	2.42117	1.81402	-0.203895	0	0.640558	-0.0167418	-0.289393
BARX1	-0.292148	-0.643324	-0.519807	-0.164703	-0.13211	0.406439	0.890127	1.05703	0.57231	0.595965	0.70177	-0.0923209	1.41336	0	0.361731	-0.0165186	-0.287008
BARX2	-0.169874	-0.50433	-0.379365	-0.028512	-0.0249877	0.557603	0.974139	0.796113	0.67509	0.81668	0.809608	-0.0661511	-0.191097	0.0315223	0.3503	0	-0.183271
BASP1	0.975378	0	0.355076	0.278326	-0.828586	0.261366	-0.883374	0.573284	0.337052	-1.40819	0.715344	-2.08248	-0.282385	-1.03439	-1.76745	0.128485	-1.70845
BASP1P1	-0.278704	-0.225257	-0.398926	-0.0754967	0.0718341	-0.68708	0.621539	-0.229959	0	-0.350365	1.08443	0.166441	-0.173444	0.478271	0.157478	0.4051	0.103816
BATF	2.21918	1.57872	1.36795	0.963606	0	1.37781	0.0323477	0.926895	1.43916	-0.0881309	-1.86461	-4.98255	-1.82254	-1.97885	-4.13861	-0.630318	-3.86458
BATF2	2.38752	0.0581236	1.44504	1.73688	0	0.22406	-0.266196	0.54613	2.54659	-1.52726	-0.381426	-0.750914	-1.22495	-0.00128746	-1.85978	1.75394	-0.579442
BATF3	0	-0.0872459	0.145909	0.140094	-1.04455	0.182812	-0.653839	-0.00738049	0.791308	-0.34563	1.19998	-2.43142	1.62679	0.543257	-2.63353	0.906207	-2.18311
BAX	0.501535	0.0875225	0.227038	0.169973	-0.0563865	-0.458194	-0.588188	-0.66819	-0.402633	-1.07443	0.25679	-0.598843	0.361516	0.214118	0.154449	0.376076	0.072243
BAZ1A	0.594026	-0.220165	-0.287716	0.0764675	-0.991467	0	-0.502433	0.019536	0.363871	-0.661596	0.00509167	-0.70935	0.492031	0.036057	-1.60817	0.785142	-0.83539
BAZ1B	-0.236592	-0.202423	-0.180925	-0.228416	-0.0838437	0.570092	0.705111	0.404321	0.515641	0.909551	0.401373	0.0702362	0	-0.514027	-0.106419	-0.135251	0.33184
BAZ2A	0	0.232415	0.0770092	0.234342	-0.420384	0.297294	0.379057	0.406898	0.159369	-0.431912	-0.521666	-0.301577	0.217792	-0.303873	-0.63514	-0.0634713	-0.0675554
BAZ2B	-0.215106	0.273063	-0.14682	0.0677099	-0.121124	0.204943	0.0366502	0.229223	0	0.281076	-1.01614	0.266079	-0.392847	-0.33123	-0.350658	-0.10951	0.0861182
BBC3	0.473892	-0.00526524	0.116757	-0.106424	0	0.428282	0.0447035	0.150113	0.453106	-0.0491695	0.647277	-0.585584	0.0160608	-0.428899	-0.548161	-0.615798	-0.0986538
BBIP1	-0.373968	-0.115677	-0.0305836	-0.0357716	-0.158688	0	0.176937	0.00220251	-0.308328	0.181962	0.210256	-0.160687	-0.462481	0.281352	0.114809	0.164157	0.282522
BBOX1	-0.0995255	-0.877472	0	-0.384335	-0.391425	0.802899	0.705591	0.854228	0.460652	0.434564	0.452032	-0.370873	1.2848	-0.298577	0.56905	-0.294035	-0.609785
BBS1	-0.132435	-0.0269132	0.185001	0.114753	-0.459248	0.542925	0.664515	0.649908	-0.138084	0.305103	0.167641	-0.0617943	-0.806489	-0.330273	-0.423269	-0.224959	-0.0294628
BBS10	0.0358028	0	0.388949	-0.0138836	0.316648	0.712914	0.884865	0.274858	-0.355721	0.235512	-1.09038	0.560018	-1.1059	-1.30958	-0.182339	-1.61164	-0.0128441
BBS12	-0.174036	0.108769	0.384056	0.0606289	-0.475569	0.333879	0.255002	0.311242	-0.30899	0.492176	-0.619998	-0.478237	0.208305	-0.0733795	-0.172604	-1.53616	0
BBS2	-0.0300722	0	-0.438858	-0.11656	-0.246947	0.0168085	0.35209	0.229069	0.00124931	0.534339	-0.162831	0.317752	-0.365273	-0.571485	0.169027	-0.614224	0.142867
BBS4	-0.09447	0.948376	-0.135491	0.063489	0.0649881	0.414701	0.412474	0.292106	0.476735	0.290777	-0.0108585	0	-0.70069	-0.97888	-0.677644	-1.24525	-0.542909
BBS5	-0.081953	0.135496	0.0393827	0.0421185	0.0117943	1.622e-05	0.0314617	0.198364	0.0808544	0.343249	-0.309997	0.261989	-0.209615	-0.143453	0.0422928	0.15852	-0.0667918
BBS7	-0.916062	-1.67417	0.157805	0.116472	-0.217972	4.68682	0.291923	0.180606	0.142494	0.606281	-0.0236559	0.677704	-0.512233	-0.440005	0	-0.195936	-0.0894079
BBS9	-0.120062	0.18581	-0.130039	0.718987	0.0436847	-0.204842	-0.699963	-0.311068	0.292863	-0.208556	0.0787196	0.725016	-0.209428	-0.00756405	0.201541	0.883104	-0.126854
BBX	-0.0557332	-0.17693	0.102531	0.0406852	-0.292806	0.0789166	0.0250883	0.0395546	0	0.448887	-0.262731	0.192732	-0.199071	-0.843955	0.206986	-0.561358	0.351175
BCAM	-0.772591	-0.926836	-0.169242	-1.15802	-0.0128403	1.12539	0.793741	1.098	0.502484	1.23879	1.75523	0.155622	-0.002388	-0.293958	0.0607233	-0.0419226	0
BCAN	0.042985	-1.31638	-1.13545	-0.823311	0	0.513474	0.468212	-0.0102158	0.033988	0.803822	0.0265422	-0.0769048	-0.861777	-0.803972	0.781755	-0.450301	1.0976
BCAP29	-0.441064	-0.0523787	-0.114134	-0.114907	0.0221181	-0.210613	0.0555129	-0.187764	-0.0824976	0.310551	0.531764	-0.00365305	0.372558	1.32177	-0.138005	1.22885	0.0437617
BCAP31	-0.0504074	-0.368317	0	-0.23763	-0.354432	0.0761194	0.155882	-0.0245008	0.144718	0.413318	0.341008	-0.429226	-0.0249739	0.310424	0.452169	0.191317	-0.00651836
BCAR1	-0.7397	0.000228247	-0.232142	-0.307885	-0.181953	-0.413263	-0.0469165	0.24132	-0.294291	-0.343418	0.522539	0.106364	1.42398	0.244319	0.0772413	1.2602	0.504527
BCAR3	-0.142075	-0.659839	-0.0877476	-0.13283	0.733181	0.188602	0.399232	0.329309	0.504162	0.111203	1.25598	-0.434758	0.294213	-0.220798	0	-1.28275	-0.945721
BCAR4	0	-0.707003	-0.234068	-0.244873	-0.185901	0.337765	0.805827	0.564332	0.512729	0.65085	0.621533	-0.23647	1.23508	-0.111011	0.215217	-0.144736	-0.0908413
BCAS1	0.278642	1.1418	0.168745	-0.506272	-0.056787	0.316219	0.771803	0.65806	0.906661	0.309665	0.262753	-0.584154	-0.279403	-0.240543	1.48301	-0.342787	-0.802323
BCAS2	-0.392517	-0.0447588	0	0.360959	0.0426264	-0.209394	0.307421	-0.277974	-0.145101	0.220038	0.613071	0.0300837	0.651513	0.643164	-0.22954	-0.00684261	-0.0294981
BCAS3	-0.447062	-0.185747	-0.326604	-0.0335588	0.120746	0.103098	0.249413	0.455675	0.336076	0.201657	0.64203	0.425391	-0.172843	-0.503351	-0.021863	-0.802131	0.0506632
BCAS4	0.327798	0.179399	0.267829	0.237061	-1.78155	-0.130887	0.913343	0.656671	0.194575	0.856499	-0.223259	-0.322838	-1.39978	-2.88955	0	-2.92392	-1.27274
BCAT1	1.10768	0.0415564	0.976775	0.449322	-0.415755	0.533859	-0.532676	-0.0407951	-0.0547934	-1.02377	-0.0517914	-0.760352	-0.266103	1.17664	-1.37849	-0.40294	-1.3213
BCAT2	-0.198294	-0.780978	-0.328343	-0.479838	0.323303	-0.350588	0.838927	0.148672	0.311712	0.302526	0.914468	1.01102	0	-0.563741	-0.151285	-0.333355	0.0912971
BCCIP	-0.362475	-0.221612	-0.172491	0.284484	-0.0916739	-0.0623693	0.585279	-0.187762	-0.0493891	0.190198	0.0267551	0.17703	-0.141861	-0.120377	-0.352206	-0.121468	0.589827
BCDIN3D	0.350505	0.228146	0.356857	0.224692	0.312725	0.317331	-0.0771637	-0.0145864	-0.0143757	0.223447	-0.579376	-0.365512	-0.514991	-0.534548	0.348625	-0.0514145	0
BCHE	-0.217333	0.155137	-0.958593	0	0.46663	-0.21777	-2.79111	-0.430747	-1.04366	0.297246	0.191342	0.587307	0.186198	-1.16839	2.4843	-0.0997343	0.326789
BCKDHA	-0.425874	-0.731128	-0.557765	-0.410494	0.0631847	1.33152	1.49003	1.02692	1.48647	0.632627	1.04884	0.58181	-0.179244	-0.11694	0.115664	0.118979	-0.224468
BCKDHB	-0.185968	-0.539414	-0.544631	-0.417258	0.32151	-0.101532	0.601836	-0.0382845	-0.18886	0.458827	0.179932	0.535876	0.161815	-0.813397	-0.0273631	0.324517	0.762089
BCKDK	-0.693778	-0.872566	-0.762129	-0.854373	-0.128336	-0.208997	0.427247	0.180339	0.109683	0.256931	1.23775	0.319335	-0.409194	0.178694	-0.05093	0.309524	0.155434
BCL10	0.770215	0.779919	0.680212	1.01888	0.604968	-0.714419	-0.20808	-0.316166	-0.517396	-0.496194	-0.411115	0	1.46488	0.322645	-0.314214	0.507814	-1.23176
BCL11A	-0.387389	-0.412409	-0.844652	-0.637177	0.484268	-0.273575	0.55111	-0.168265	0.129483	0.167981	-0.0978919	0.547153	0.758073	0.111848	-0.385034	0.280427	1.26683
BCL11B	2.23346	1.5989	1.275	0.664058	0.281179	1.47422	-0.32799	1.24517	1.01719	-0.169482	-1.84352	-1.36521	-1.60142	-1.73669	-2.47057	-1.90253	-1.61668
BCL2	-0.231315	0.254504	0.191224	0.901739	-1.49887	-0.134775	0.0927324	0.226568	0.600077	-0.259102	-0.192383	0.33288	-0.36523	-1.19675	-0.254996	-1.15852	0.574667
BCL2A1	1.50508	0.663512	0.459713	1.33402	0.0102716	0.531652	-0.954276	0.363351	0.455111	-0.468337	-0.721608	-1.25855	0.598951	-0.368119	-0.827762	-0.161181	-0.289582
BCL2L1	-0.598863	-0.565707	-0.0976338	-0.486829	-0.236079	-0.0228467	0.992452	0.0614581	0	-0.0694613	1.02028	0.0561996	0.108898	0.627434	-0.491221	0.102331	0.183757
BCL2L10	-0.270781	-0.262923	-0.506927	-0.141498	-0.117928	0.832232	0.925243	0.700815	0.629093	0.618329	0.718478	0.352636	-0.204687	0	0.636295	-0.0160246	-0.314834
BCL2L11	0.871674	1.03453	1.02024	0.864148	0.437351	-0.39959	-0.410013	0.3229	0.628213	-1.15176	-1.45889	0.0624682	-0.020174	-0.636408	-0.0991675	-0.63508	-0.260623
BCL2L12	-0.00177717	-0.117829	-0.210291	-0.0296252	0.137684	-0.25511	-0.152352	-0.145289	-0.126498	-0.18345	0.381814	0.0212717	0.320203	0.409069	0.687952	0.554311	0.339786
BCL2L13	-0.856466	-0.394633	-0.445022	-0.234191	-0.0376225	-0.335445	0.237008	0.0131084	-0.0401851	0.00442012	0.526724	0.129582	0.31379	0.559966	0.308134	0.533526	0.0914141
BCL2L14	0	-0.975105	-0.808161	0.00955486	-0.676324	0.214371	0.648901	0.29354	0.197854	0.232471	0.27946	-0.688	-0.75551	1.41024	-0.250155	-0.515981	-0.747736
BCL2L15	-0.332807	0.645348	0.551915	0.37497	0.721021	-0.764248	-0.298362	-0.664794	-0.726865	-0.736854	-0.131675	-0.195621	-0.0893042	-0.220868	-0.0746987	0.41619	0.523654
BCL2L2	-0.324621	-0.311674	-0.250052	-0.145864	-0.333578	0.291962	0.654228	0.0972824	0.191991	0.572302	0.446485	-0.196243	0	-0.0177984	0.198126	-0.373987	0.227836
BCL3	-0.73623	-0.00480557	-0.395391	-0.215	-1.16388	0.317615	0.823236	0.238737	1.12919	0	2.64999	-1.39607	2.31619	1.6571	-0.812882	1.70872	-0.486571
BCL6	-0.693083	-0.273723	-0.524444	-0.581902	-1.11861	0.136953	0.149868	-0.0125732	0.063262	-0.283015	1.2356	-0.941609	1.94302	0.590963	0.591608	1.71993	0
BCL6B	-0.669924	0.424895	0.448506	-0.362463	1.25351	0	-0.560133	0.323648	1.20084	-1.57475	1.0564	0.421221	-0.232522	0.78296	-0.523447	-0.475642	-0.584641
BCL7A	-0.879146	-0.816907	-0.998715	-0.424774	-0.0625229	-0.184253	0.398283	0	0.183229	0.544181	1.43759	0.650273	0.86183	0.481057	-0.122107	-0.622288	0.35857
BCL7B	-0.251493	-0.0097456	0	-0.0774965	0.305568	-0.901753	-0.302053	-1.04383	-1.00609	-0.492544	0.0673733	0.109276	0.812736	0.678678	0.735114	1.30283	0.505576
BCL7C	-0.5956	-0.648313	-0.304703	-0.55319	-0.021462	0.298647	0.870082	0.171549	-0.0835238	0.252669	0.869983	0.191925	-0.329226	0.250154	0.364903	0.15827	-0.0316725
BCL9	-0.357572	0.161651	-0.0685964	0.752425	0.483559	-0.20372	-0.112287	-0.185642	0.226952	0.0550175	-0.897845	0.70185	-0.237689	-0.422939	0.309241	0.0491481	0
BCL9L	-0.858394	-0.880278	-0.775925	-0.782862	-0.62013	0.553359	0.574372	0.480755	0.742219	0.328515	0.616058	0.0610647	-0.062834	-0.484235	-0.354311	0.489585	0.0651283
BCLAF1	0.103893	0.0595408	-0.017406	0.279945	0.021421	-0.208388	-0.0176129	-0.00438594	0.106819	0.161911	-0.367608	-0.0866318	0.260494	-0.0589309	-0.739411	0.0742774	-0.203658
BCMO1	0.851832	0.262694	-0.252899	0.785868	-0.717185	2.82522	0.4443	0.584041	0	0.327245	0.110937	-0.790672	-0.918508	-0.28942	-0.343405	-0.0738001	-0.586671
BCO2	-0.179252	-0.43769	-0.161363	-0.000499	0.506071	0.522296	1.08797	0.390681	-0.134087	-0.767816	0.463922	0.719117	-0.238929	0	1.52568	-1.11314	0.759734
BCOR	-0.413829	0.190857	-0.837384	-0.295277	-0.905373	-0.166881	-0.0720011	0.356121	0.505231	-0.106744	-0.0851882	-0.336963	0.717819	1.209	-0.56112	0.577728	-0.355353
BCORL1	-0.642066	-0.143621	-0.451758	-0.813099	-0.432004	0	-0.19411	-0.506008	0.117335	0.0444088	-0.517873	0.0147572	1.07767	0.135525	0.314087	0.56997	0.0865927
BCORP1	-0.0982683	-0.434672	-0.134475	0.113632	0.0994475	-0.591062	-0.0790992	-0.245745	-0.0806668	-0.1459	0.136839	0.304848	-0.191457	0.146292	0.172657	0.0672939	-0.107706
BCR	-0.381561	0.0803089	-0.0832253	-0.599959	-0.0786881	0.18869	0.106095	-0.031174	-0.109046	-0.0445499	0.90022	0.335066	0.758539	-0.0216681	-0.323451	0.504221	0.0380195
BCRP2	-0.545836	-1.19253	-0.244524	-0.754556	-0.229283	0.132815	-0.0389056	0.241295	-0.376369	0.0312634	0.946502	0.342501	0.537102	0	-0.0407186	0.682638	0.501899
BCS1L	-0.144382	-0.313128	-0.0277367	-0.119891	0.336478	-0.30824	0.262629	0	-0.1216	0.172096	0.820846	0.360174	0.09723	-0.274923	0.314111	-0.0455675	0.46387
BDH1	0	-0.299532	-0.312138	-0.480021	0.653596	-0.233633	0.543835	-0.190929	-0.109166	0.238338	0.348011	0.612091	0.0305986	-1.04593	-0.12077	0.193118	1.18293
BDH2	-0.375161	0.155079	-0.150931	-0.0659275	-0.484682	0.465233	0.178814	0.194248	-0.388517	0.421509	0	0.4655	-0.597438	-0.491269	0.429994	-0.473828	0.264554
BDKRB1	0.0945911	0.6008	-0.312558	-1.46455	-0.936474	1.00983	0.474159	-0.77981	-0.703777	-0.601171	1.35857	0	3.0723	0.332998	-0.689309	1.36424	-1.12364
BDKRB2	-0.0497565	0.182437	0.973952	-0.944877	-0.478816	0.158406	-0.334858	-0.771512	0.236981	-0.634109	2.21127	-1.64605	1.88029	0	0.144594	1.53256	-1.59787
BDNF	-3.0713	0.515506	-3.33771	-1.96859	-0.0253794	-1.40477	1.2053	0.160022	-0.276599	1.19583	0.830383	-0.358236	1.49057	0.264646	-4.21066	1.18072	-0.112716
BDNF-AS1	0.329812	0.370457	0	1.33335	0.314897	0.152565	-0.414782	-0.00755787	0.394911	0.784569	-0.881278	-0.174538	-2.17002	-0.485269	-0.577998	-2.295	0.0705395
BDP1	-0.127139	-0.252014	0.0579028	0.26758	0.0155725	-0.192886	0	0.228443	-0.375683	0.488781	-0.017858	0.418868	0.0996003	-0.316041	-0.651029	-0.646474	0.171048
BEAN1	0.360777	-0.105728	0	-0.639052	0.139668	0.117578	-0.00902128	-0.299673	-0.166518	-0.0336699	-0.618447	0.489982	0.968838	0.125367	-0.423109	0.0986333	0.527786
BECN1	-0.584763	-0.64818	-0.677981	-0.34267	-0.414261	-0.159333	0.311192	0	0.111914	0.438758	0.318148	0.306634	-0.219166	0.0977287	-0.198425	0.10944	0.0956554
BEGAIN	-0.593101	0.509389	0.37971	0	-1.14177	0.774212	0.518697	0.6594	-0.689016	1.14234	0.0587392	-0.497501	-0.647176	-0.058557	1.45926	-0.540698	-0.166532
BEND2	-0.0625782	-0.499686	-0.0594716	0.152858	0.0260041	1.33365	-0.196605	-0.232138	0.131417	0.097234	-0.101833	-0.0648527	-0.197912	0.316461	1.10568	-0.00806737	-0.0389664
BEND3	-0.146267	0.0277724	-0.0871997	0.283927	0.511629	-0.734028	-0.348553	-0.658361	-0.376482	-0.0280492	-0.312649	0.104549	0.618536	0.246997	0.358344	0.176823	0.296947
BEND4	1.27595	-0.704106	-0.613019	0.456527	-0.420735	0.0831373	0.608727	0.375359	0.31165	0.376848	0.416463	0.315799	1.52247	0.487127	0.0918486	-0.311576	-0.615979
BEND5	0	-0.0345449	0.131819	0.157191	0.467459	-0.0837612	0.0807385	0.110785	-0.45209	0.181396	-0.274303	0.528806	-1.69448	-0.301623	0.254484	-1.00588	-0.00158787
BEND6	-0.0941279	-0.492308	0.947731	-0.0704789	0.377007	0.961015	1.25643	0.695525	0.923744	0.971051	0.0480733	-0.657601	-0.975831	-1.70775	0.187497	-1.52189	-0.538577
BEND7	-0.731779	-0.455178	-0.835348	-0.423315	-0.401422	0.139072	0.277692	-0.106747	-0.106362	0.00300026	-0.312052	0.137592	0.308644	-0.0793471	0.0630395	0.51213	0.618823
BEST1	0	0.242315	0.545477	-0.328434	-1.08026	0.175529	0.238474	-0.271524	0.136589	-0.665669	0.133279	-1.49322	-0.0607867	0.280052	0.0822167	-1.03191	-1.65795
BEST2	-0.0638695	-0.16715	0	0.223245	0.429088	-1.91851	-1.55016	-2.54361	-0.833108	0.0601363	-2.07528	0.366082	0.128202	0.0400462	0.33894	-0.320871	0.245639
BEST3	-0.310471	-0.608486	0.0277255	-0.111296	0.6054	-0.696573	0.341296	0.627805	0.41163	0.485177	0.772217	-0.200544	0.137963	0.0425088	0.678981	0.17263	0.141761
BEST4	0.746076	0.54482	0.960754	-0.100358	0.0985303	0.484867	-1.06538	-0.629573	-0.0773993	-0.230774	-0.865355	0.651605	0.446923	-0.242085	2.17908	-0.208537	0
BET1	0.128919	0.0581684	-0.170495	-0.0746217	0.19704	-0.0602605	0.0302494	-0.122884	-0.374366	0.190448	-0.225137	0.0829999	-0.218195	-0.0928278	0.117398	-0.044795	0.312572
BET1L	-0.206179	-0.112387	-0.0140017	-0.0429277	0.0388282	-0.0621907	0.136335	-0.689079	0.20859	-0.520117	0.186302	0.0594002	-0.0280167	0.251547	-0.048945	0.129341	-0.426005
BET3L	0.0475748	0.0568984	-0.168899	0.149611	0	-0.0101702	-0.255824	0.00206995	-0.223419	-0.167315	-0.795872	0.168257	-0.167821	0.0234227	0.282802	0.111487	-0.105993
BEX1	-0.480283	-1.12108	0	1.49961	-0.791047	1.44763	0.279068	-0.293936	-0.629179	0.234686	1.00788	0.5369	-2.87694	0.607863	1.92932	-1.7135	-0.441909
BEX2	-1.19727	0.382276	-0.223754	-0.122715	-1.12579	-0.197207	0.214047	0.379671	-0.793824	0.00790405	0.521835	0.730303	0	-0.309689	3.56412	-0.971203	0.291732
BEX4	-0.690141	-0.391659	-0.401954	-0.301921	0	0.574332	1.13284	0.470724	0.515365	1.27995	0.545339	1.13168	-0.285894	-0.225277	0.685008	-1.12064	-0.0122948
BEX5	0.384366	0.74008	0.426023	0	1.4503	-0.33838	-0.267677	-0.385156	-0.0360002	0.13617	1.72318	-1.01918	0.52985	-0.117304	0.903571	-0.31971	-1.38141
BFAR	-0.295803	-0.222382	-0.0722561	-0.373537	0.00122166	0.000495	0.158152	0.137647	0	-0.00253582	0.227778	0.363356	0.625511	-0.300331	-0.351111	0.106997	-0.0924139
BFSP1	0.255158	0.250859	0.298106	0.0703168	0	0.568415	-0.299933	-0.00774479	-0.516914	0.285807	-0.621114	-0.0998268	-0.534293	-1.17268	-0.126152	0.0492072	0.454541
BFSP2	1.81995	1.47581	1.60598	1.66386	-1.03283	0.298102	0	1.36729	0.632256	-0.0693765	-0.190892	-1.08519	-0.867151	-1.01533	0.44298	-1.03181	-1.33538
BGLAP	-0.807217	-1.11675	-0.745374	-1.01076	-0.227974	-0.0359449	1.02595	0.278029	0.179243	0.181552	0.803071	0.1786	0.375519	-0.780879	0	-0.853446	0.78574
BGN	-0.395857	0.274383	0.85715	0.574182	-1.11305	2.37882	0	0.996623	0.983483	0.970867	1.24674	-0.703303	-1.00704	-0.424265	-0.969231	-0.445168	-1.01148
BHLHA15	-0.338721	-0.00875092	0.733206	0.192216	0.215669	-0.488456	-0.0984755	-0.336026	0	-0.124942	0.762826	0.731111	1.04319	0.0253258	0.821921	-0.761866	-0.740772
BHLHA9	-0.595306	-0.311554	0.15803	-0.133719	0.526899	1.76215	0.795713	0.146247	0.481485	0.342707	1.02451	-0.300756	-0.272576	-0.293398	-0.047447	-0.0567174	-0.608693
BHLHB9	-0.401114	-0.360961	-0.183673	0.258397	0.332632	-0.592729	0.128493	-0.14972	-0.812686	0.0682812	-0.169821	0.593616	0	-0.79122	0.669424	0.0195875	0.47059
BHLHE22	2.32607	2.30075	1.83452	1.05229	1.10946	1.85994	-0.821204	0.848972	0.402345	0	-3.53596	-1.68737	-0.222981	-2.88506	-0.749866	-1.63588	-1.9611
BHLHE23	0.408299	-0.209918	0.361353	0.286615	0.277746	-1.3722	-1.50628	1.34243	-1.06898	-0.344666	0.178862	-0.21053	0.127076	-0.171368	-0.0543041	0	0.587336
BHLHE40	-0.638095	0.575834	0.483043	-0.209002	-0.641933	-0.181234	0.871227	-0.0163355	0.769325	-0.044239	3.30754	-0.646097	2.65224	1.56516	0	1.48834	-0.66014
BHLHE41	-0.720323	0.486982	-0.403436	0.140757	0.0286074	0.0107622	0	-0.799123	0.522517	-0.335615	0.533939	-0.283091	-1.1078	-1.31186	0.575576	0.18092	-0.616309
BHMT	-0.543419	-0.210643	0.36979	-0.412582	-0.394407	1.23288	0.625006	0.372307	0.978781	0.652018	0.438493	-0.0140758	0.00461149	-0.182782	0	-0.126708	-0.21203
BHMT2	-0.361398	-0.208198	0.124533	-0.0937314	-1.93747	-0.172896	0.0699511	0	-1.70734	0.201712	0.444353	0.0809197	-0.358969	-0.756191	2.13951	0.54492	0.139329
BICC1	0.264045	1.74814	0.650121	0.416739	-0.385697	1.06556	-0.153621	0.209322	-0.256689	-1.01666	-0.731211	-0.620377	-0.779934	-0.0545342	0.592422	0.224439	-0.790924
BICD1	-0.196705	0.611591	0.0930257	0.920448	-0.889425	0.280427	0.0985737	0.00993347	0.319896	0.324692	-1.05794	0	-0.538223	-0.914394	-1.17424	-0.327885	-0.61035
BICD2	-0.350405	-0.531626	-0.445398	0	-0.0963173	-0.296168	0.23638	-0.084794	0.0705471	0.208291	0.332222	-0.15107	0.314219	-0.0805006	0.0994625	0.330855	0.375606
BID	0.111039	-0.283472	-0.310442	-0.191886	0.1034	-0.0909033	-0.0799074	0.0686336	0.0660329	-0.490395	0.811162	-0.650033	0.650834	1.02473	0.128024	1.24593	0.516568
BIK	0.944509	1.24685	1.01815	0.928112	-1.75013	0.419954	-1.4675	-0.257217	-0.356665	-1.40642	-0.505083	-1.31147	1.13817	0.321412	-0.93537	0.394883	0
BIN1	0.420722	0.285349	0	0.144132	-0.287351	0.389149	-0.130191	0.38326	0.269257	0.181085	0.190451	-0.542786	-0.112185	-0.418064	-0.446958	-0.479871	-0.107751
BIN2	2.27171	1.35061	1.53822	0.725146	0.173519	1.76486	0	1.65322	1.29513	-0.601003	-1.25293	-2.09675	-2.11487	-2.00975	-4.02996	-3.82767	-2.17377
BIN3	-0.376116	-0.474085	-0.365399	-0.433406	-0.498186	0.0257215	0.241939	0.254971	0.187446	0	0.459495	-0.200189	0.765671	0.0279236	-0.43219	0.267868	-0.966613
BIRC2	-0.205376	-0.329071	-0.224575	-0.234365	-0.0818367	-0.233191	0.128745	0	0.0785818	0.0819044	-0.0448713	0.0523462	0.723038	0.386507	-0.459092	0.334923	0.0922737
BIRC3	1.69223	1.0042	0.516661	0.46041	-0.27008	0	-0.643646	0.0862722	-0.29494	-1.33609	-0.899419	-1.86945	2.34123	2.03703	-1.08857	1.30086	-1.05725
BIRC5	1.45816	-0.00936985	0.573491	0.794804	0	-0.652028	-1.27637	1.02366	1.12284	-0.846133	1.08679	0.826575	0.495903	-1.68747	-2.86752	-1.1505	-0.491594
BIRC6	0.587934	0.0302982	0.00965404	0.349822	-0.0112457	-0.125049	0.33151	0.0395746	0	0.311247	-0.163933	0.0379553	-0.150641	-0.0549297	-0.923685	-0.419747	-0.396267
BIRC7	-0.36203	0.469143	0.7475	0.424957	-0.362747	-0.446909	0	0.150332	-0.0211525	-0.258319	0.719343	0.372447	0.344005	-0.0971408	-0.136439	0.262305	-0.213475
BIRC8	-0.139793	-0.50349	-0.390526	0	-0.0112963	0.501743	1.00796	0.787206	0.723133	0.863044	0.826382	-0.0694799	-0.207517	0.0111961	0.38477	-0.0187836	-0.312051
BIVM	-0.395267	-0.324879	-0.414013	-0.0875778	0.0199165	-0.335073	0	0.111324	0.0920191	0.402605	0.0842228	0.0902595	-0.153331	-0.632831	0.659883	-0.174927	0.745823
BK250D10.8	-0.0373311	-0.0229972	-0.16604	0.112637	0.408249	0.367323	0.557338	0.881342	0.729047	0.285819	0.475968	-0.420853	-0.0831761	-0.434732	-0.053777	-0.303897	-0.0588236
BLACE	-0.392313	-0.709425	-0.613948	-0.221963	0.802775	2.76303	0.789208	0.621602	0.464822	0.825459	2.645	-0.0845413	-0.474366	0	0.311241	-0.27797	-0.538888
BLCAP	-0.531669	-0.450976	-0.24325	0.0535433	0.294305	-0.488418	0.67105	-0.0101135	-0.262554	0.0907285	1.13448	-0.0892208	0.20773	0.370203	0.285898	-0.282242	-0.0834205
BLID	0	2.52961	1.60546	-0.103954	-0.47456	1.96564	-0.169793	-0.979631	-0.605393	0.62016	-0.967034	0.498629	0.781663	-1.02516	2.17386	1.49114	-1.97806
BLK	2.77551	1.84845	1.47298	1.49892	-1.90076	0.935565	1.62289	2.51893	1.87865	0	-1.75144	-2.08344	-2.91522	-1.86159	-2.31372	-2.70904	-2.88186
BLM	0.0821648	-0.528143	-0.408025	-0.76208	-1.02652	0.516706	0.255151	0	-0.240037	-0.265965	-0.565566	0.280421	1.10793	0.489598	1.38761	-0.31943	0.803973
BLMH	0.0764408	0.0738363	0.0514774	-0.0210552	0.126534	-0.203255	0	-0.0907879	-0.287718	-0.00378704	-0.360229	0.253763	0.149919	-0.538159	-0.466242	0.085371	0.120764
BLNK	2.71851	2.57893	1.43865	2.3054	1.05924	1.39321	-0.499691	0.370873	1.90399	-0.239276	-0.670694	-0.00293517	-1.31815	-1.87167	-1.81738	-1.7271	-2.34758
BLOC1S1	-0.361009	-1.34147	-0.767245	-0.934298	-0.735113	0.760845	1.24518	0.891906	0.985551	1.53221	1.91256	0.288936	-0.36073	0.0420055	0	-0.0753975	-0.215909
BLOC1S2	0.150923	-0.0076189	0.235482	0.375099	0.0355577	-0.892289	-0.572722	-0.213534	0	-1.03337	0.45322	-0.327277	0.196319	0.489841	-0.337093	0.313665	-0.254643
BLOC1S3	0.0145597	-0.0200574	0.23925	0.18217	-0.327599	0.186748	-0.159957	-0.0922739	0.259462	0.101392	0.0932987	1.66796	-0.533468	-0.023824	-0.516055	0.170445	0.140849
BLVRA	0.0467749	-0.53382	-0.000778	-0.104388	0.14327	-0.354313	0.334384	-0.165003	-0.26617	0.135201	0.570734	-0.0484667	0	0.31966	-0.200919	0.111684	0.490697
BLVRB	0.0507946	-0.582742	-0.244943	-0.485525	0.192891	-0.165353	0.52179	-0.163399	-0.159611	0.287656	0.913127	0	-0.20021	0.260304	-0.182728	0.00710201	0.446875
BLZF1	0.104367	0.362946	0.271677	0.492288	0.196317	0.226451	-0.0123242	0.167126	0.0554641	0.458028	-0.325389	0.458264	-0.259061	-0.409746	-0.445235	-0.648286	-0.141135
BMF	0.875564	1.05871	0.571003	1.05807	-0.828074	1.16655	0.0677896	0.462136	1.57278	0	-1.1597	-0.241719	-0.612345	-2.16405	-0.340133	-1.50619	-0.00691485
BMI1	0.0457745	0.217962	0.219364	0.405006	0.051728	-0.380404	-0.249634	-0.327425	-0.359081	0.143708	-0.503123	-0.0524373	-0.0968912	-0.575666	0.305571	0.0224433	0.373224
BMP1	-0.52341	0.202445	-0.0714524	-0.412014	-0.395018	-0.378275	-0.358468	0.0946465	-0.305236	-0.560913	0.11018	0.557159	0.0540206	0.417166	0.481377	0.221807	0.43694
BMP10	0.949282	-0.175555	-0.587034	-0.105105	1.12167	0	0.527713	0.305856	0.991964	0.22048	0.339584	-0.252003	-0.565656	0.658516	-0.00937223	-0.38027	-0.652454
BMP15	-0.189369	-0.624459	-0.463417	-0.117187	0	0.53762	0.912231	0.703339	0.745018	0.821589	0.747124	-0.128239	0.0270305	-0.0547013	0.317875	-0.0611835	-0.365973
BMP2	0.711172	0.848422	1.3765	-0.0368123	0.624848	-0.0695462	0.402111	0	-0.663573	-0.223545	-1.2089	-0.230857	0.239138	0.277557	0.374551	-1.56087	-0.335387
BMP2K	0.216026	0.161605	-0.322422	-0.266992	-0.132096	0.230745	0.0057284	0.0979428	-0.341892	0.0353645	-0.106395	0.427891	-0.683525	-0.194367	0.633977	0.192204	-0.194175
BMP3	-0.148244	-0.514151	-0.4011	-0.0143833	-0.000442	0.612394	1.00427	0.789315	0.728343	0.964931	1.69072	-0.0844736	-0.214812	0.167101	0.372847	-0.0202637	-0.321791
BMP4	-0.704518	0	0.568778	-1.84207	-0.57149	1.84836	0.491686	0.798512	0.254929	1.03634	0.688203	0.192021	-1.03026	-2.65581	-2.18404	-0.380651	-0.783124
BMP5	-0.25156	0.317987	0.0151587	-0.560551	0.664185	-0.0524211	0.0376663	0.625299	-0.0670195	0.286643	-0.421772	1.57672	-1.1426	-0.484275	0	0.960915	-0.0511227
BMP6	-0.169308	0.788932	0.105597	0.983924	-0.559315	0.425158	0.57043	0	0.0110574	1.7717	0.349926	-0.936437	-2.09687	-0.61443	-2.01255	-1.97086	-0.800112
BMP7	-0.853377	-1.51988	-1.33867	-2.92263	-0.225152	0.260527	-1.4596	-1.71202	-1.4907	-1.53524	1.53065	0.356077	3.50261	2.47612	4.66966	1.02855	0.348996
BMP8A	-1.26699	0	0.0891962	0.550052	-2.22615	-0.626121	-1.20837	0.18236	-0.498944	0.510176	-0.386261	-2.09912	-0.561965	2.62624	1.1817	2.55417	0.888193
BMP8B	-0.148159	-0.0373435	-0.306639	-0.0479763	-0.246783	-0.776627	-1.02808	-0.692398	-0.812073	-1.01685	-1.4694	-0.736885	-0.281784	0.623209	0.189374	0.604305	-0.521813
BMPER	1.29436	1.0218	0.974632	3.39493	-0.0946014	1.48507	0.823788	0.224096	0.156751	0.302197	0.243642	-0.257233	-0.610602	-0.0804737	0.651414	-0.495426	0.437169
BMPR1A	-0.586724	-0.247181	-0.424548	0.0500367	0.194094	-0.194647	-0.292668	-0.19168	-0.100353	0.0260704	-0.0619852	0.285933	-0.30203	0.664298	0.475977	1.00142	0.319417
BMPR1B	-0.680503	-1.05411	0	-0.554121	-0.534354	0.501396	0.479753	0.254798	0.491641	0.603486	1.22576	-0.0980377	1.73515	0.0608873	-0.107957	-0.491719	-0.80072
BMPR2	-0.00858498	0.0583239	0.0872974	0.303019	-0.0826912	-0.492226	0	-0.0771828	-0.191014	0.214409	-0.147789	0.25601	0.801607	-0.388487	-0.192288	0.400925	0.495784
BMS1	-0.11689	-0.118352	-0.229199	-0.0810877	-0.128772	0.13855	0.296592	0.442468	0.020752	0.135273	-0.323049	0.33674	-0.228362	0.353563	-0.150739	0.208941	-0.269434
BMS1P1	-0.0629516	1.07615	0.0627518	0.611062	-0.188595	0.645976	-0.0478168	1.11128	-0.184394	-0.0435734	-0.564377	0.561128	0.195593	-0.0834122	0.715615	-0.785547	0
BMS1P4	0.152282	0.718291	0.559971	0.38076	-0.349389	-0.543893	-0.386407	-0.0854049	0.736876	0.224338	-0.769143	0.265928	-0.696358	0	0.548605	-0.310612	-0.0956283
BMX	0.236622	-0.486003	0.293541	0.703321	-0.253011	0.278052	-0.388461	0.408231	-0.621233	0.576695	0	-1.30334	-1.08453	0.132624	-2.15135	0.093967	-0.458156
BNC1	-0.806568	-0.911375	-0.949323	-0.679429	-0.673756	-0.114113	0.345139	0.113101	0.0697503	0.357121	0.171552	-0.676792	1.02205	0.421306	0	0.855521	-0.937556
BNC2	0.540534	0.95763	1.59661	-0.705193	-0.519705	1.0385	0.0914523	0.233402	0.395261	-0.0784837	0.506211	-0.52631	-1.042	0.197644	1.40459	0.081409	-1.24956
BNIP1	-0.389171	-0.30988	-0.549635	-0.157888	0.0493832	0.185302	0.531064	-0.0580626	0.462376	0.102559	0.854324	0	-0.232896	-0.212896	0.0831614	-0.646798	0.0287004
BNIP2	-0.0304923	-0.059885	0.0389819	0.183228	0.135255	-0.275105	-0.0342302	-0.338856	-0.499001	0.0515866	0.116077	-0.283748	0.444274	0.415157	-0.0469127	0.377953	0.340084
BNIP3	-0.715525	-0.681686	-0.450229	0.0428638	-0.0176325	-0.124686	0.544675	0	0.0911064	0.638739	0.463656	-0.0452299	0.175335	-0.123498	-0.378199	0.325712	0.108119
BNIP3L	-0.0132345	0.471249	0.195453	0.21357	-0.246934	0.664833	0.0816787	0.34739	0.401327	0.482654	-0.693672	-0.145449	-0.215967	-0.572811	-0.0271778	-0.494097	-0.256505
BNIPL	0.0493698	-0.74418	-0.266377	-0.495858	-0.142227	0.71162	0.219655	0.27844	-0.119352	0.176761	-0.491505	0.502012	0.0785356	-0.52628	0.1127	-0.745934	0.0364172
BOC	0	0.820649	0.222422	-0.433501	-0.318103	1.30238	0.0552216	0.814763	0.181767	0.487113	-1.39343	0.174805	-0.635967	-1.07362	-0.911866	-1.12221	-1.04063
BOD1	-0.196501	0.262276	-0.0515699	0	0.565056	-0.211356	-0.384476	-0.491355	-0.145951	-0.446324	0.380695	-0.100416	0.870601	0.378171	0.281327	0.595167	0.212629
BOD1L	0.0173248	0.144459	0.0619558	0.249997	0.101289	-0.121669	-0.0202673	0.0386852	0.0083011	0.108996	-0.980761	0.237759	-0.432336	-0.598433	-0.417522	-0.522986	-0.0402416
BOD1P	-0.312596	-0.364621	-0.32992	0.374654	0.138909	-1.13696	-0.530641	-0.881919	-0.957988	-0.7376	1.47093	0.241242	0.150322	0.234155	-0.0592153	0.901736	0.542192
BOK	-0.451012	0	0.216031	-0.67159	-1.02803	0.898608	-0.507743	0.334094	0.100106	0.868563	0.464564	-1.29678	0.126544	-0.912298	0.215228	-1.3219	-0.543136
BOLA1	-0.509593	-0.865119	-0.485615	-0.562815	0.0364265	0.365857	0.296245	0	-0.0405369	0.560706	0.437616	0.269824	-0.21588	-0.50605	0.679943	-0.605069	0.257136
BOLA2B	-0.0983698	-0.353068	-0.531192	-0.19572	-0.166726	-0.219736	0.0518309	-0.00442727	0.118043	0.0811396	0.868113	-0.183271	-0.00588528	0.434707	1.01858	0.556849	-0.12697
BOLA3	-0.0666828	-0.187526	-0.452622	-0.105739	0.718359	-1.18394	-0.646658	-1.2476	-0.943321	-0.516671	-0.255985	-0.0137825	-0.0535912	0.31533	0.478517	0.37883	0.6185
BOLL	-0.231322	-0.482782	-0.47868	-0.0930827	-0.0843933	0.467757	0.975782	0.721415	0.643971	0.787742	0.747751	-0.0540261	0.08482	-0.045073	0.328015	-0.0592229	-0.151113
BOP1	-0.72226	-0.757869	-0.679238	-0.66799	-0.707974	-0.237086	0.324814	-0.159248	0	0.217048	0.974504	0.111044	0.129025	0.542117	-0.329567	0.6811	0.432224
BORA	1.54175	0.606703	1.13229	0.78787	-0.357856	0.283684	0	0.608592	1.04052	-0.665849	-0.0918751	-0.780588	-0.0119743	0.414993	-1.54345	-0.246467	-1.30632
BPESC1	-0.2314	-0.590966	-0.469897	-0.132143	-0.0850215	0.396717	0.920083	0.69104	0.612625	0.673889	0.734684	-0.09057	-0.185599	0.0242	0.354449	0	-0.278903
BPGM	-0.31074	-0.346878	-0.388319	-0.154384	0	-0.047121	0.435125	-0.212058	-0.0941343	0.14047	0.506898	-0.146204	0.378879	0.0878916	0.455312	0.375022	0.395101
BPHL	-0.0261097	-0.0844622	-0.0419226	-0.0338039	0.132154	0.0613928	0.715468	0.182507	-0.0562515	-0.106072	0.93154	0.478026	-0.794304	0.181897	0	0.372782	-0.438248
BPI	-0.0636291	-0.757568	-0.33446	0.340932	-0.341501	0.747796	0.720023	0.508394	0.782107	0.379214	0.505176	0.000450611	-0.507296	-0.297461	0.0860367	-0.316661	-0.608709
BPIFA1	-0.44603	0.0440016	0.0603962	0.0430045	0.508918	-0.769152	0	-0.551094	-0.646593	-0.474261	0.629652	0.604604	0.992003	-0.0457573	-0.0847921	0.700018	-0.00229359
BPIFA2	-0.301754	-0.646156	-0.554954	-0.171681	-0.191056	0.955581	2.5804	0.668093	0.589543	0.676582	0.66268	-0.0600028	-0.188131	0	0.401688	0.0319476	-0.31338
BPIFA3	-0.183904	-0.523129	1.08132	0.267853	-0.0349193	0.447992	0.992514	0.795362	0.690592	0.639331	0.794529	-0.117087	-0.22996	-0.0281053	0.34942	-0.0507298	-0.328865
BPIFA4P	-0.683733	-1.027	-0.938307	-0.555544	-0.5606	0.568039	0.511992	0.298418	0.228745	0.269249	0.296978	0.0482736	-0.578139	0.468832	0	-0.0022912	-0.707724
BPIFB1	-0.185487	-0.532751	-0.412986	-0.0596848	-0.00641394	0.57018	0.979116	2.14395	0.697108	0.909636	2.17023	-0.0804849	-0.184677	0.038538	0.377275	0	-0.27355
BPIFB2	0.654388	0.0131993	0.449453	0.136588	0.27001	-3.21134	-2.43943	-3.18216	-3.24329	-2.40579	-2.11123	-0.0713224	0.19825	0.267305	-0.02949	0.152876	0
BPIFB3	-0.467059	0.581211	-0.698568	-0.340434	0	0.336173	0.687847	0.452529	0.411857	0.714214	0.521683	-0.330797	-0.480601	-0.25075	0.0863886	-0.292078	-0.559846
BPIFB4	-0.127843	-0.464001	-0.356832	-0.00437975	-0.0300169	0.526155	1.03895	0.89124	0.737595	0.797225	0.790901	-0.0607429	-0.202307	0.257737	0.416295	0	-0.32831
BPIFB6	-0.165509	-0.505284	-0.381241	-0.0259819	0	0.660998	0.971865	0.760377	0.689037	1.02721	0.811106	-0.0966139	-0.195385	0.0337162	0.345112	-0.00844622	-0.307703
BPIFC	-0.15251	-0.493066	0.0970635	-0.00838947	-0.0106015	0.51047	1.17476	0.823069	0.727587	0.697031	0.799711	-0.127956	-0.249647	0.114961	0.336343	-0.0583971	-0.342965
BPNT1	0.441199	0.335047	0.478497	0.459122	0.403386	-1.39336	-1.35171	-1.48177	-1.60919	-1.47937	-1.3814	0.010622	0.086452	-0.1744	0.128086	0.089823	0.0997391
BPTF	-0.0894893	0.152861	-0.292224	-0.185938	0.0248065	0.488344	0.0367761	0.474119	0.16845	0.559258	-0.651221	0.319647	-0.380358	-0.226503	-0.0191801	-0.284266	0.432987
BPY2B	-0.151681	-0.445744	-0.350941	0.0178437	-0.00470257	1.02909	1.0303	0.853863	1.13242	0.821019	2.69851	-0.0992308	-0.221299	0	0.354539	-0.0159779	-0.282708
BRAF	-0.348652	0.257439	-0.318096	-0.0333338	-0.468923	-0.246625	-0.0767589	-0.177819	0.218014	0	-0.24165	0.0658226	0.403077	0.304646	0.323547	0.379504	0.469487
BRAP	-0.0422373	-0.126462	0	0.112225	0.0190992	-0.0973043	0.460969	-0.0260935	0.162098	0.522379	0.0456653	0.653149	0.019042	-0.169054	-0.427258	-0.172203	-0.0273428
BRAT1	0.306264	-0.102137	-0.0103235	0.222884	0	-0.224174	-0.223303	-0.274112	0.180181	-0.0395746	0.222414	-0.143728	-0.294204	0.139294	0.270173	0.30798	0.0916109
BRCA1	0.0195069	0.268334	0.0264916	0.281768	0.279434	-0.0354009	-0.447051	0	-0.131166	0.102882	-0.588592	0.433218	0.0762415	-2.40972	-0.451242	-2.23387	-0.314003
BRCA2	1.38876	0.839812	1.49814	1.1627	-0.563953	0	0.543677	0.432906	1.27857	-0.0402517	-0.00625849	-0.907146	-0.378397	-0.544094	-0.506308	0.215369	-1.23884
BRCC3	0.350352	0.185357	0.0477207	0.537759	0.261582	-0.180382	0.283167	-0.118375	-0.0632783	1.07915	-0.119447	-0.141647	0.289218	-0.543451	0.759307	-0.503415	0.337268
BRD1	0.662429	0.75563	0.586222	0.482088	0	0.390062	-0.566118	-0.0517035	-0.199679	-0.101367	-1.18623	-1.19612	0.45641	0.256347	-0.204324	0.285055	-0.0635576
BRD2	-0.0340595	-0.425624	-0.233481	-0.253741	-0.428291	0.00669098	0.0959187	0.0472498	0.295742	0.00287056	0	-0.50427	0.639654	0.2307	-0.716312	0.522826	-0.101891
BRD3	-0.191701	-0.199201	0.0877757	-0.0146755	0.029547	0.359154	0.526812	0.455189	0.811075	0.493439	0.131535	0.0233619	-0.0781019	0.00877452	-0.279117	-0.0572803	-0.103115
BRD4	-0.383179	-0.264128	-0.222233	-0.0224816	-0.417976	-0.0264969	0.512741	0.217631	0.476802	0.410408	0.450854	-0.047946	0.488536	0.122116	-0.476497	0.551954	0.0475586
BRD7	0	0.360502	-0.10404	0.3054	-0.0297296	-0.212632	-0.051389	0.269767	-0.134504	-0.198685	-0.968999	0.00891924	0.0491455	0.22978	0.395549	0.468983	0.222852
BRD7P3	0.350501	0.884924	0.0556812	0.447146	-0.232026	-0.341336	-1.37895	-0.386751	-0.62258	-0.942143	-3.37096	-0.157722	0.168885	0	0.887071	0.923895	0.442327
BRD8	0.0156932	-0.14686	-0.315415	-0.106968	-0.198999	0.489809	0.442694	0.47799	0.326292	0.537899	0.1005	0.0495262	-0.362501	-0.412107	-0.00693965	-0.318002	-0.0795102
BRD9	-0.224686	-0.0371094	-0.0731096	-0.105778	-0.0736446	0.34915	0.653548	0.252422	0.0411568	-0.0863876	0.33597	-0.113312	-0.390659	0.165516	0.0285997	0	0.0496492
BRDT	-0.273407	-0.618323	-0.528566	-0.142899	-0.154601	0.685807	0.924431	0.716894	0.629858	0.607678	0.706512	-0.0487771	-0.20431	0.00541735	0.37443	0	-0.329766
BRE	-0.476558	-0.687844	-0.534982	-0.407879	-0.113681	0.0390167	0.924844	0.120907	0.372999	0.539336	0.583323	0.549143	-0.611834	0.0416288	0	-0.370249	-0.286758
BREA2	2.46641	1.72489	1.01874	-0.971231	0.126854	1.14353	-0.329817	0.702586	-0.565029	-0.622162	-1.97559	-0.55018	0.894317	-1.61119	1.12137	0	-0.11675
BRF1	0.0953045	0.00312853	0.00878811	-0.0293436	0.127458	-0.48571	-0.422744	-0.648699	-0.388656	-0.514115	-0.562631	0.00271273	0.00138354	0.0693207	0.293868	-0.0966463	0.239151
BRF2	-0.594034	-0.695176	-0.152598	-0.238012	-0.0776648	0.435786	0.749423	0.317628	0.109805	0.387397	0.230101	0.396885	0.000157	-0.804753	-0.550228	-0.775732	0
BRI3	-0.270834	-0.445159	-0.367523	-0.355087	0.296401	-0.332847	0.266798	0.0265813	-0.127594	0.0439978	0.895908	-0.0947356	0.22538	0.168856	0.0659909	-0.0722227	0.185804
BRI3BP	-0.274929	-0.193451	-0.646726	0	-0.321285	0.345584	0.00673533	0.493268	0.353318	0.215494	0.163964	0.28989	-1.1128	-0.829442	-0.22541	-0.595553	0.274307
BRIP1	-0.164252	-0.294744	-0.055191	0.128779	-0.084075	0.663242	1.32449	0.705006	2.12565	0.707189	0.744792	-0.0912766	-0.207603	0	0.350841	-0.0275989	-0.312874
BRIX1	-0.460562	-0.148328	-0.0973301	0.0590553	-0.242509	0	0.219363	-0.0427666	0.228681	0.704224	0.62849	0.277986	0.321958	0.419976	-0.14361	-0.124116	-0.438423
BRK1	-0.349657	-0.438399	-0.198545	-0.261313	-0.028557	0.209138	0.570036	0.0907685	-0.119028	0.0633863	0.614934	-0.349292	-0.0578403	-0.0161271	0.13363	0.0147285	0.377168
BRMS1	-0.111362	-0.226026	-0.0386941	-0.0627341	-0.294348	-0.109358	0.30145	-0.11115	0.264936	-0.0251756	0.840321	-0.0477359	0.222509	0.514304	0.0187619	0.921741	-0.158561
BRMS1L	-0.834374	-0.539377	-0.30682	-0.163149	-0.108068	0.186436	0.605522	0.290259	-0.0864344	-0.04848	0.932026	0.230658	0.0334043	-0.158977	0	0.20047	0.191887
BROX	0.0184922	-0.0830526	-0.193137	0.0612292	0.0806889	0	-0.0592089	-0.219419	0.123081	0.109381	0.0397515	0.337617	-0.346628	0.619603	-0.717604	-0.166938	-0.310635
BRP44	-0.926082	-0.658639	-0.534152	-0.221926	0.0602427	-0.551952	0.291789	-0.236785	-0.264303	0	0.649306	-0.111944	0.187604	0.0625582	0.0487175	0.511512	0.545167
BRP44L	-0.584617	-0.399561	-0.714029	-0.0847268	0.725744	-0.985683	0.330247	-0.0304804	-0.385955	-0.216278	0.781631	0.330503	-0.156389	0.246194	-0.384663	0.45286	0.581776
BRPF1	-0.22993	-0.418948	0	-0.285276	-0.0203452	1.00211	0.915565	0.834217	0.656805	0.276865	0.822087	0.0497479	-0.0331435	-0.110112	-0.639516	-0.307904	0.0447397
BRPF3	-0.711156	-0.0504227	-0.627422	-0.443177	-0.322341	0.719026	-0.109991	0.447743	-0.701095	0.802185	0.591481	0.404898	0.310763	0.266489	0.453265	0.724503	0.807465
BRS3	-0.599743	-0.542824	-0.464589	-0.475374	-0.458784	0.0586195	0.965132	0.349565	0.264583	0.384853	0.381215	-0.435895	-0.558448	0.549489	0	0.0114384	-0.105331
BRSK1	-0.355536	0.655908	0.752398	0.379612	-0.98723	0.0220957	-0.0318327	-0.45879	0	0.0623589	0.0275054	-0.863906	-0.396298	-0.544331	4.37168	-0.495719	0.120035
BRSK2	0.71797	0.27537	0.406162	-0.150541	-0.75151	-0.438972	-0.647842	-0.153333	-1.2241	-1.19521	-1.50256	0.0217035	0.608792	0.337787	0.797451	0.401712	0.418546
BRWD1	-0.349298	0.0229347	-0.231453	0.090775	-0.0433218	0.0921276	0.431607	-0.0486642	0.100526	0.500492	-0.602399	0.297968	-0.0147959	-0.915221	-0.0244488	-0.0936583	-0.134916
BRWD1-IT2	-0.0535974	0.0820122	0.097867	0.163039	0.415771	-1.8564	-0.811133	-0.00207567	-1.2324	-1.14632	-1.13679	0.640493	-0.211146	0.657117	0	0.283134	0.687191
BRWD3	0.518354	0.437658	0.0394478	0.618239	-0.171373	-0.342543	-2.25546	-0.410641	-0.675421	0	-1.38491	-0.0684175	0.412483	0.376373	-0.336033	0.580965	0.0221148
BSCL2	-0.161665	-0.0609031	-0.0592599	-0.208189	-0.159572	0.489288	0.287573	0.782589	0	0.349639	0.624452	0.0855632	-0.123143	-0.610721	0.713631	-0.412969	0.258543
BSDC1	-0.174124	0.162875	-0.134854	-0.28188	-0.151996	0.603971	-0.0739361	0.458986	0.186765	0.166271	-0.511284	-0.022102	-0.0284689	0.008852	0.00374556	0.151691	0.210451
BSG	-0.992231	-1.11169	-0.885157	-0.715552	0.0568504	0.184079	1.4915	0.423864	0.411014	0.840745	1.85911	0.227899	-0.120569	-0.0246305	-0.34468	0	-0.0289717
BSN	0	-0.582808	0.242145	-0.557679	-0.505795	0.789633	0.580174	-0.175621	0.64929	0.0882702	0.0993915	0.583254	-1.63542	0.529553	-0.345914	-1.33222	-0.727664
BSND	-0.395023	-0.736966	-0.615085	-0.271215	-0.0767846	0.711746	0.767709	0.537829	0.471691	0.656471	0.590404	0.804584	-0.353828	-0.111221	0.191268	-0.167562	0
BSPH1	-0.467017	-0.806646	-0.342546	-0.325872	-0.0373893	0.930642	1.89437	0.520401	0.423592	0.416453	0.534948	0.919064	0	-0.163296	0.164227	-0.193405	-0.362935
BSPRY	0.333677	-0.243065	0.174312	-0.234737	-3.66494	0.804647	-1.14632	0	0.351944	-0.012219	0.342457	-1.14264	0.809946	-0.191708	0.99146	0.102863	-0.779625
BST1	0.335825	0	0.59849	-0.206849	-0.0486989	1.37587	0.174353	0.0842791	0.088551	0.203952	0.19568	-0.569729	-0.562519	-0.76527	-0.344675	-1.32299	-1.11178
BST2	0.716946	0.0617685	0.857177	0.211908	0.0189614	0.263638	-0.327079	0.293715	0.484161	-0.127741	-0.384152	-0.241004	-0.088758	-0.140625	-1.56046	0.314312	-0.41011
BSX	-0.869249	-0.904663	-0.844822	-0.724194	5.87306	1.63579	2.11136	0.893871	0	0.709876	1.50738	0.896829	-0.826041	-0.60425	0.416375	-0.62592	-0.952142
BTAF1	0.0199389	-0.168741	-0.18865	-0.225948	-0.128237	0.401387	0.875943	0.324701	0.135525	0.344187	-0.336038	-0.408102	0.663045	0	-0.91794	0.0918164	-0.435684
BTBD1	-0.448995	-0.601043	-0.317153	-0.243588	0	-0.293879	0.346204	-0.360269	-0.0534115	0.212298	0.608352	0.270281	0.319906	0.125664	-0.0770111	0.437991	0.414691
BTBD10	-0.260927	-0.188921	-0.132449	0.0334373	-0.027473	0.322387	0.209026	0.00913238	-0.0191708	0.359707	0.570966	-0.261842	-0.0617681	0	-0.396089	0.274424	0.118987
BTBD11	0.195302	-0.081768	-0.494051	-0.51213	-3.02831	0	0.67259	0.409105	-2.10646	0.0925193	-2.18416	0.978023	0.870051	-2.89983	1.88094	-2.3928	1.35122
BTBD16	-0.432744	-1.32682	0.583344	0	-0.801351	2.13419	0.592466	0.00298929	-0.0595512	1.11131	0.79185	-0.206671	-0.986514	-0.144668	-0.376384	2.31205	1.73671
BTBD17	-0.480279	0.753504	-0.106721	4.76559	-0.362743	3.60721	0.6884	0.511807	0.662935	0.306111	0.469268	-0.465058	-0.600624	-0.407829	0	-0.410771	-0.71397
BTBD18	-0.123232	-0.477155	-0.353055	0.609512	0	0.522247	1.04236	1.17056	1.12192	0.673764	0.836005	-0.104476	-0.0879388	-0.053412	2.21495	-0.0632148	-0.214287
BTBD19	-0.529771	-0.164133	-0.109971	0.348731	-0.172332	1.0261	1.12291	0.938082	1.34316	1.03297	0.201498	-0.660258	0.504465	-0.352238	-0.0443373	0.536469	-0.183639
BTBD2	-0.703112	-0.984777	-0.561119	-0.895993	-0.521762	0.226209	0.808605	0.173402	0	0.451884	0.790861	0.242015	-0.367759	-0.65082	0.0631981	-0.354351	0.0236616
BTBD3	-0.898758	-0.638973	-0.594644	-0.683904	0	0.285641	0.329799	0.075592	0.184216	0.293098	0.942395	0.185914	-0.444324	-0.0763931	-0.338207	-0.207559	0.12663
BTBD6	-0.3838	-0.402387	-0.383711	-0.401832	-0.0737295	-0.227645	0.280668	0	0.213684	0.0434322	0.78847	-0.60067	0.577827	-0.0280247	0.751755	0.265774	0.858975
BTBD7	-0.208635	-0.09392	-0.0865359	0.0333039	-0.193972	0.0361633	0.0818115	0.054511	-0.00986528	0.30985	-0.451445	-0.143962	-0.051095	-0.0852499	0.131145	0.260398	0.196
BTBD8	-0.489742	0.542293	0.157797	0.111576	0.0567389	0.594473	-0.33814	-0.0146	-0.591444	0.292399	-2.08354	0.54244	-1.09494	-2.60685	0.0334063	-2.91293	-0.198935
BTBD9	-0.557954	-0.168558	0.0073266	0.134913	-0.300959	0.0043869	0.407911	-0.19509	0.159427	0.177912	-0.802457	0.461435	0.308513	0.450416	1.06899	0.304202	-0.746819
BTC	0.725066	0	0.844868	-0.204002	-0.752609	0.244825	0.0779262	-0.135807	0.0744882	1.11599	-0.115787	1.96376	1.53168	-0.530765	-0.0336866	-0.926028	-0.119909
BTD	-0.0931239	0.0622444	0.329799	0.324802	0	0.490914	0.164269	0.171964	-0.241056	-0.316536	-0.779251	-0.116528	-0.991134	-0.995101	0.250805	0.0115871	-0.166465
BTF3	-0.606779	-0.532625	-0.374824	-0.594908	0	-0.292574	0.209755	-0.369645	-0.387124	0.042819	0.361321	-0.391833	0.0517893	0.410164	0.143204	0.0980949	0.0792656
BTF3L4	-0.15962	0.00213981	0.0954547	0.337018	0.0269401	-0.104394	0.00158644	-0.25889	-0.37141	-0.724482	0.298947	-0.569401	-0.0428007	0.620764	-0.44199	0.189043	0.0654931
BTF3P11	-0.613044	-0.478724	-0.323448	-0.485004	0.0420446	-0.388507	0.11327	-0.345479	-0.594042	0	0.335827	-0.114317	0.00856399	0.352527	0.0518036	0.0281429	0.133728
BTG1	0	0.00165463	-0.423332	-0.14626	-0.968541	0.227311	0.190586	0.035799	0.0405827	0.129892	-0.405128	-0.644504	0.109988	-1.57189	-0.479178	0.00236607	-0.527877
BTG2	-0.466918	0.464053	-0.121362	-0.574794	-0.978117	0	-0.304125	0.0835972	0.00785255	-0.0853968	0.522346	-0.598784	1.71225	2.46105	0.156791	1.99915	-0.696365
BTG3	0.0550833	0.202889	-0.0390511	-0.0674248	-0.633686	-0.263309	0.164002	-0.0272684	-0.756427	0	-0.281863	-0.61477	1.1523	0.559561	0.0595732	0.814369	0.549914
BTG4	-0.220996	-0.557264	-0.435257	-0.0968671	-0.0464945	0.51566	0.9379	0.708156	0.644095	0.854989	0.762355	-0.095521	-0.186142	0.0347281	0.348973	0	-0.286664
BTK	2.76199	1.63418	2.06319	1.66464	0.539291	1.29845	-0.341012	0.840853	1.76848	-0.456069	-1.50882	-2.14198	-1.15926	-0.95654	-2.10479	-0.356189	-1.7672
BTLA	3.63073	2.89364	2.80914	2.53137	0.898946	1.46986	-0.651987	1.61656	1.3766	0	-0.827489	-1.72531	-1.65671	-1.09712	-1.26428	-1.65488	-1.92081
BTN1A1	-0.55131	-0.506779	-0.478646	-0.155347	2.29357	0.127149	0.621836	0.414574	0.319338	0.432172	0.401083	-0.0815854	-0.140099	0.117006	0.0300281	0.157516	0.0159578
BTN2A1	0.371571	0.429149	-0.00490856	0.237027	0.107285	-1.90785	-2.04365	-1.83427	-1.38035	-1.58741	-3.12427	-0.597819	-0.00670052	0.180071	-0.468883	0.433568	-0.132891
BTN2A2	1.68897	1.57343	1.0912	0.795058	0.229482	-0.0523434	-0.77578	-0.132338	0.0291061	-1.47699	-1.95135	-0.293933	0	0.135369	-0.953157	0.75612	-0.0522637
BTN2A3P	0.314255	0.191927	0.239755	0	-0.0614815	0.505422	-0.174106	-0.0116615	0.724012	-0.0764027	-1.28725	0.34882	0.0842304	-0.0923109	-1.24647	0.41486	-0.471497
BTN3A1	1.92271	1.54432	1.35271	0.982188	0.383796	0.793838	-0.240262	0.767577	1.44201	-0.57365	-1.2763	-0.156589	-1.07548	-0.956282	-1.64518	-0.272431	-0.630677
BTN3A2	2.02813	1.5316	1.68356	1.12392	0.387583	1.21262	-0.884792	0.984955	1.5385	-0.552557	-2.10662	-0.161929	-0.871025	-0.870339	-1.92965	-0.233279	-0.822414
BTNL2	-0.608772	0.0963759	-0.703829	-0.13098	0	0.848129	-0.314461	0.975884	-0.0020628	0.140515	-0.859791	0.415538	0.331065	0.00917625	-0.0236216	0.896178	-0.137022
BTNL3	-1.21606	0.995225	1.93377	3.92492	0.411084	2.38467	-0.0723228	-0.24768	0.909286	-0.237124	0.792135	0	-1.23896	2.0376	-0.696125	-1.04742	-1.34525
BTNL8	0.493974	-0.135652	-0.822858	0.067956	-0.0771229	-0.620483	-0.192505	0.705735	0.442413	-0.571941	-0.52797	-0.651948	-0.26254	0.400128	0.407623	-0.330432	0.425388
BTNL9	-0.679991	-0.106074	-0.380234	-0.243695	-0.498822	0.441229	0.175404	0.657982	0.23902	0.375857	-1.16361	0.716426	-1.53258	0.0615511	-0.418041	0.102351	0.335946
BTRC	-0.926171	-0.745475	-0.607243	-0.424842	-0.55265	0.269128	0.697206	0.443012	0.0616159	0.364467	0.432786	0.200233	0	-0.882977	-0.0130739	-0.500069	0.238334
BUB1	1.24516	0.232138	0.739502	1.98526	-0.842937	0.104331	-0.648755	-0.822635	0.101851	0	0.425913	1.10514	-0.43597	-1.20751	-0.177641	-1.7166	-0.526754
BUB1B	0.494075	0.0748687	0	0.297678	0.329893	-0.533674	-1.57902	0.291833	0.610209	-1.41208	0.0416455	0.604784	-0.0228648	-0.412388	-0.145853	-0.827952	-0.240039
BUB3	0.43601	0.442482	0.365098	0.386077	0.149352	-0.113177	-0.198946	-0.0430355	-0.182719	0.0305653	-0.47123	0.0540905	0.102331	-0.313241	-0.506509	-0.148469	-0.187301
BUD13	0.00436974	-0.150896	-0.0406923	0.0873747	0	0.272006	-0.00258446	0.108624	0.337413	0.196422	-0.402527	0.0642109	0.0180616	-0.266245	-0.452914	-0.538347	-0.0545778
BUD31	-0.120232	-0.399402	-0.0421076	0.15292	-0.0769319	-0.0804033	0.211276	-0.0979557	0	0.426888	0.518098	0.0813618	0.351642	0.123291	-0.0255623	0.122466	-0.404968
BUTR1	-0.173966	-0.517632	-0.394226	-0.0403204	-0.00300694	0.680272	0.962421	0.740548	0.684721	1.67154	0.80325	-0.0882745	-0.188844	0.0458164	0.356834	0	-0.296979
BVES	-0.842594	-1.32023	-0.31226	-0.300797	-0.194445	-0.375191	0.321886	0.204754	-0.496115	0.24053	0.816704	0	0.0734901	0.257677	-0.0406399	0.874148	0.911447
BYSL	-0.552466	-0.655219	-0.615836	-0.419701	-0.067524	-0.173136	0.452266	-0.123542	0.0845947	0	1.03543	0.0987453	1.11463	0.983419	-0.145971	0.902251	0.122647
BZRAP1	0.224696	0.0877285	0	0.278159	0.331487	-0.0160584	-0.606678	0.117757	-0.48488	-0.487594	-0.804405	0.216806	-0.574987	-1.68391	0.403449	-1.65422	0.565869
BZW1	-0.159868	-0.444862	-0.372098	-0.121174	-0.334416	0.386644	0.413035	-0.0809819	0.326599	0.0380157	1.04299	-0.490406	0.434573	0.446745	-0.662584	0.815001	-0.726715
BZW2	-0.720239	-0.515277	-0.712536	-0.364797	0.334395	-0.672124	0.0893822	-0.207156	-0.260177	-0.0526624	0.303313	0.355905	0.2819	0.25739	-0.100438	0.169306	0.63229
C10orf10	0.659755	1.85015	0.747765	0.750866	0.549959	0.326159	-0.915448	-1.5418	-0.069726	-1.28338	-0.771139	-0.282392	-0.160136	1.37246	-1.21238	0	0.31286
C10orf105	2.40755	2.40775	1.94492	1.6564	0.3977	1.82591	0	2.87209	-0.312073	-0.3242	0.124969	-1.01204	-1.10133	-0.90251	-0.561501	-0.923768	-1.19508
C10orf107	0	0.144301	-1.35331	0.574101	1.27813	3.10702	0.0424657	-0.185688	0.838518	0.768339	-0.114512	-0.983913	-1.12475	0.58031	-0.543326	-0.098072	-1.23599
C10orf108	-0.285743	0	-1.33782	-1.29431	-0.0689058	-0.0190434	-0.240581	0.0012331	-0.403537	1.36715	0.662524	-0.454556	1.60046	4.0242	3.71031	3.28075	0.65723
C10orf11	0.0884419	0	-0.43161	-1.40538	0.445671	-1.01535	-0.728093	-0.546997	-1.80918	-1.06255	0.145112	0.477081	0.69982	-0.117473	0.530961	0.0204959	0.464311
C10orf111	-0.0981317	-0.639692	-0.503712	0	-0.131755	0.383406	1.45921	0.681316	0.626352	1.07426	0.723862	-0.0779948	-0.221096	-0.0125346	1.04406	-0.0191135	1.00378
C10orf112	-0.523468	0.265508	0.204834	0.261514	-0.389666	0.18263	0.549546	0.114686	-0.219155	0.202174	0.330441	-0.00619283	-0.0805159	-0.242873	0.344099	-0.0283699	-0.424057
C10orf113	-0.158154	-0.533617	-0.427132	-0.0285964	0	0.626173	1.009	0.785408	0.735494	0.948788	0.842237	-0.0829611	-0.217257	0.00761414	0.37614	-0.0174026	-0.318954
C10orf114	-0.429813	0.264313	-0.396045	-0.531426	0.0361557	0.52091	0.0291295	-0.788356	-0.169156	0.687696	0.663639	-0.653352	0.999651	-0.951887	1.8574	-0.779561	0
C10orf116	0.412045	-0.156989	0.530419	-0.657171	-0.914518	0.307246	1.20563	0	-0.113905	1.03435	0.929916	-0.393577	-0.347085	0.486613	0.906103	-0.818587	-0.577498
C10orf118	-0.438765	-0.418326	-0.483944	0.295952	-0.386925	0.305543	0.354491	0.276619	0.115407	0.575663	0.186357	-0.264405	1.23679	-0.0775974	-0.165944	0.354908	-0.0211716
C10orf12	-0.419629	0.0877175	-0.0687451	-0.160794	0	0.0110798	-0.609805	-0.516194	-0.465196	-0.375344	0.819424	0.360448	0.767935	-0.0817814	0.392504	0.331512	0.572233
C10orf120	-0.412064	-0.0662172	0.107022	-0.0113516	0.206165	0.156304	0.215753	0.140306	0.237762	0.720078	0.0483343	0.619025	0.114549	0.220864	0.346331	-0.515038	-0.00191045
C10orf122	-0.179133	-0.500923	-0.392284	-0.00787878	0.839806	0.462161	1.00021	0.838552	0.679401	0.63552	0.819754	-0.0854297	-0.210221	0	0.375192	-0.02912	-0.287785
C10orf125	0.687161	0.184638	0.205786	-0.190542	-0.535798	0.540451	-0.529997	-0.037426	0.0819349	-0.707445	0.740888	-0.602035	-0.410864	0.823747	1.35798	-0.378169	0
C10orf128	0.0209273	0.115045	-0.587493	-0.367924	0.767747	0.187667	0.0198207	-0.0555256	0.458755	-0.214278	0.230143	-0.466705	-0.521684	-0.100888	-0.26137	-0.440269	0.0275283
C10orf129	-0.957259	0.790186	0.152974	-0.29607	-0.689333	1.03183	1.05822	0.14446	0.295488	0.367386	0.567272	-0.254824	0.47965	-0.283108	0.00468429	-0.003208	-0.855864
C10orf131	-0.942303	0.145376	-1.21166	0.0657387	-0.785592	-0.156858	0.222322	-0.00134373	0.102079	0.185832	0.0567884	-0.860552	-0.25404	-0.769799	0.464406	0	0.847177
C10orf136	-0.192851	-0.534767	-0.410693	-0.0524936	-0.0285087	0.636419	0.942962	0.730869	0.661743	1.01031	0.782894	-0.12913	0.810956	0	0.314155	-0.0428047	-0.342
C10orf137	0.00178655	0.0428154	-0.0543358	0.00429821	0.0261154	0.237561	0.24062	0.117704	0.234738	0.524175	-0.230331	0.767322	-0.238173	-0.575769	0.0707542	-0.605428	-0.191469
C10orf140	-0.636297	-0.360432	0.0160522	0.343063	-0.189528	-0.47462	0.471725	-0.277771	-0.13203	0.257871	-0.730996	-0.0551009	-0.632066	-0.405826	0.37963	-0.429508	-0.227565
C10orf2	-0.997305	-0.645364	-0.344545	-0.0895643	0	0.0510941	0.381865	-0.208622	-0.200944	0.50248	0.248621	-0.217499	0.308638	0.172986	-0.52614	0.0331674	0.0667381
C10orf25	-0.814012	-0.327539	-0.256157	-0.333607	0	0.432861	0.097898	0.539671	-1.01167	0.289603	1.3814	0.402003	-1.64104	-2.43603	0.0462718	-1.80763	0.0601635
C10orf26	0.255349	0.46019	0.61201	0.329888	-0.17905	0.593821	-0.465551	-0.0349998	-0.129164	0.0281334	-0.0596533	0	0.768379	-0.0134525	-0.426919	-0.102338	0.206356
C10orf27	0.073823	-0.0782557	0.318896	-0.035059	-0.0692055	-0.86165	0.410973	-0.707849	-0.0734813	-0.694344	-0.360461	0.245173	0.457212	0.0640979	1.0946	1.02988	0.366984
C10orf28	0.10126	-0.0439498	0.172527	-0.0936937	-0.231177	0.608762	0.382706	0.397873	0.195706	-0.0137959	-0.0611618	-0.025182	-0.497221	-0.339444	-0.65452	-0.20193	-0.712953
C10orf32	-0.0502071	0.117833	-0.0380878	0.284648	0.44129	-0.40618	-0.27494	-0.245938	-0.0486059	0.237555	0.457878	0	0.598946	0.154139	-0.147174	0.37769	-0.063714
C10orf35	0.080081	-0.00979996	0.177441	0.0825319	0.3686	0.261116	0.409776	-0.712132	0	0.37404	-0.313942	-0.091671	-0.623089	-1.33444	0.901144	-0.899533	-0.358796
C10orf40	-0.520962	-0.867327	0.0810323	-0.371593	-0.359312	0.157957	0.660822	0.45786	0.365312	0.316311	0.484601	0.0629425	-0.610657	-0.397097	0	-0.418468	-0.677436
C10orf46	-0.172881	-0.170458	-0.0965912	-0.274948	-0.0958235	-0.101876	0.163588	-0.39782	-0.0780673	0.182103	-0.146887	0.118766	0.222546	-0.13232	0.0511353	0.348798	0.356377
C10orf47	-0.45756	-0.267761	0.910289	-0.175386	-0.779944	1.79705	0.379407	0.416217	1.22009	1.5865	1.09223	-0.518332	0.0351415	0.185485	-0.410738	-0.0749319	-0.312336
C10orf53	-0.136723	-0.16379	-0.657258	-0.264677	0.0571609	0.15521	0.656235	0.54567	0.854255	0.423129	-0.446607	0.114316	0.205923	-0.0929017	0.254273	-0.0825353	-0.173611
C10orf54	0.322718	-0.220208	0.182721	-0.365166	-0.447704	0.462641	0.239387	0.439263	0.275374	-0.05515	1.33681	-0.387781	0	-0.0765772	-0.545161	-0.059556	0.443311
C10orf55	-0.493585	0.531361	-0.764518	-0.106626	-0.369387	0.316137	0.60276	0.380051	0.333182	0.806671	0.447759	-0.444992	0.477181	-0.329558	0	-0.376074	-0.677581
C10orf57	0.194224	-0.00988277	0.0622479	0.0028944	0.2033	0.287372	-0.0663145	0.313838	-0.378704	0.161521	-0.424674	0.614564	-1.02527	-1.36472	-0.549972	-2.64404	-0.341712
C10orf58	-0.784464	-1.02745	-0.533924	-0.57746	-0.271203	-0.172599	0.870842	0.0789423	-0.208712	0.818208	0.225586	0.551004	-0.104766	0.201642	0.767727	0.464607	0.640231
C10orf62	0.132297	-0.19186	-0.534118	-0.158153	-0.192938	0.307715	0.863264	0.698199	0.550818	0.505952	0.643773	-0.164518	-0.381807	-0.182975	0.228028	-0.189901	0
C10orf67	-0.269319	-1.14755	-1.54477	-0.236177	-0.706645	-0.388018	0.239492	0.362079	0.513724	0.470624	1.45665	0.486134	-0.199648	-0.584957	0.721258	0.342949	0.529498
C10orf68	-0.447488	0.392561	0.684974	-0.300085	0.448335	0	0.638944	0.388957	0.608368	0.13873	-0.0139778	0.574995	-0.557813	0.109646	-0.464233	-0.860749	-1.15875
C10orf71	-1.0503	-0.0855155	-0.384893	-0.789436	0.687736	0.0418218	0.880377	-0.0693626	0.0185865	0.295138	0.192511	0.858424	-1.47214	-3.19448	-0.511716	-2.42025	0.545195
C10orf76	-0.413501	-0.590783	-0.279918	-0.0276642	-0.0593224	-0.182011	0.157096	0.128103	-0.0729158	0.233347	0.350889	0.264691	0.0464888	0.328148	0.358312	0.706264	0.0579247
C10orf81	-0.225643	-0.50389	-0.367498	0.72466	-0.208362	0.0057276	0.100045	-0.118835	0.478181	0.529468	0.219192	-0.13203	0.414875	-0.0561587	1.16561	0.0895594	0.170121
C10orf82	0.442309	0.773221	-0.0179243	-0.598209	-0.233999	-1.17604	-0.73525	-0.0814629	2.00507	1.58909	-0.914072	0.278403	0	0.828726	1.62248	0.44265	-0.624733
C10orf88	-0.0398474	0.0218363	-0.0415049	0.119001	0.0217924	-0.00796699	-0.0415134	-0.0729685	0	0.0823345	0.349953	-0.163906	0.326924	-0.141493	0.238468	0.115913	-0.0777311
C10orf90	-0.183294	-0.531285	-0.41668	-0.0485117	-0.0312519	0.992568	1.13979	1.1928	1.61481	1.36131	0.794095	0.829501	-0.212049	0	0.363318	-0.0287602	-0.3091
C10orf91	0.0546994	0.0448403	-0.418177	-1.00499	0.368284	-0.329875	1.65437	-0.197126	-0.242466	0	1.93049	0.585347	-0.899839	-0.326642	-0.152345	0.82428	1.19217
C10orf92	-0.482192	-0.22201	-0.718569	0.248116	0.576062	0.769813	1.08703	0.502141	0.783746	0.761094	0.499457	-0.341899	-0.454617	-0.258931	1.13043	-0.269811	-0.568784
C10orf93	0.279045	-1.33605	-0.0991754	-0.0190573	0	0.00887394	1.47262	-0.0124016	0.393022	0.246848	0.000546	1.3616	-0.88452	1.20218	-0.303007	-0.673531	-1.00978
C10orf95	0.999598	0.279617	0.723669	0.0541873	-0.855486	0.640898	0.183747	-0.034729	-0.112387	-0.122084	0.269217	0.288507	-1.09253	-0.880452	0	-0.259933	-0.1001
C10orf96	-0.11831	-0.103677	0.154756	0.0223813	0.186298	-1.61388	-0.95675	-1.19147	-1.55129	-1.16003	-1.19188	0.132148	0.0301881	0.542599	0.537585	0.325034	0
C10orf99	-0.22441	-0.182477	-0.013762	-0.0780129	-0.00903749	0.516343	2.08363	0.785833	0.632299	0.638767	0.732804	-0.0680165	-0.218239	0	0.380182	-0.0213566	0.0141053
C11orf1	-0.592325	-0.732014	-0.640915	0.311322	-0.167551	0.0559897	0.520635	0.0631874	0.162235	0.316653	0.961654	0.0337577	-0.653774	-0.124133	0.936637	-0.334289	-0.330013
C11orf10	-0.477465	-0.790693	-0.59312	-0.368614	0.0200205	0	0.621894	0.190973	0.101561	0.5587	0.986265	-0.0114431	-0.362676	0.337404	-0.239058	0.189629	-0.107035
C11orf16	-0.27142	-0.621664	-0.502536	-0.146385	-0.131908	1.58063	0.892113	0.690171	0.572189	0.620416	0.715699	-0.063808	-0.195518	0.0145602	0.383492	0	-0.272033
C11orf2	-0.698066	-0.869746	-0.627435	-0.705937	-0.444035	0.230726	0.715828	0.147012	0.41568	0.4161	0.650008	0.265532	-0.588644	-0.228023	-0.0369234	0	0.0347147
C11orf20	0.433929	0.511592	0.181054	0.764279	0.0925336	-0.347701	-2.0275	-0.170709	0.0686431	-1.05171	-0.827386	-0.51776	-0.196311	0.0875201	0.811728	0	-0.182063
C11orf21	-0.0264111	0.521221	-0.395647	-0.121654	0	0.5916	0.413548	0.159271	-0.0814495	-0.0410013	0.179302	0.432163	-0.387861	-2.12213	0.656956	-2.25839	0.800383
C11orf24	-0.689133	-0.742473	-0.545014	0.2286	-0.299126	0.440091	-0.0907783	-0.28626	0.55219	0	1.06093	-1.00875	0.110692	0.644075	-0.70579	0.563472	0.160034
C11orf30	-0.234532	0.232461	-0.160613	0.273355	0.299532	-0.00701428	-0.305172	-0.122142	0.114928	-0.286435	-0.110123	0	0.74453	0.172436	-0.00319529	0.124759	0.61845
C11orf31	-0.216095	-0.216278	-0.202319	-0.0726066	-0.0168595	-0.211703	-0.0144768	-0.314184	-0.166487	0.420154	0.244962	-0.635323	0.0300474	0.070169	0.407434	0.234609	0.126196
C11orf34	-0.161909	-0.498268	-0.401645	-0.015913	0	0.537736	1.04094	0.822647	0.735553	1.25417	0.799322	-0.11373	1.03079	-0.0551686	0.320371	-0.0688767	-0.337863
C11orf35	0.890869	0.925197	0.678924	0	-0.683357	0.692795	-0.820725	0.162885	1.53998	0.0200505	-0.757425	-0.798619	-0.938378	-0.908304	0.254983	-0.756811	-1.1226
C11orf36	-0.582865	-0.867714	0.819313	-0.441496	-0.468143	0.393898	0.610012	0.435649	0.403655	0.337014	0.389352	-0.362038	-0.518625	-0.298288	0.0604019	0	-0.648077
C11orf40	-0.118541	-0.451702	-0.353024	0.0259666	-0.00833082	0.485465	1.04549	0.874774	0.734341	0.671882	0.830028	-0.0774612	-0.200214	0	0.408364	-0.00953293	-0.313637
C11orf41	-0.304688	-0.409969	-0.140903	0.407217	-0.528194	0.509283	0.601175	0.473222	0.469622	0.359402	0.827448	-0.350313	-0.917448	-0.220567	-0.337437	-0.311939	-0.53614
C11orf42	-0.17904	0	0.212182	0.173157	0.490873	-1.26235	-0.851717	-0.796014	-0.985043	-1.00225	-1.09962	0.850821	-0.204119	0.56908	0.195651	0.169905	0.521067
C11orf44	-0.148358	-0.446465	-0.352732	0.0276556	-0.0043025	0.509437	1.02949	0.870035	0.691569	0.750684	0.800642	-0.0934687	-0.217281	0	0.368888	-0.0149441	-0.281421
C11orf45	-0.350941	-0.869267	-0.354423	-0.336774	0	0.655039	0.971271	0.936002	0.630019	1.54294	0.507247	0.220669	-0.698642	-1.24481	0.291665	-0.9603	-0.277019
C11orf46	0.105891	-0.0364227	0.112213	0.372621	0.492753	-0.646818	-0.258208	-0.425154	-0.168409	-0.694066	-0.414517	-0.123702	0.00308418	0.0976086	0	0.196677	0.667969
C11orf48	-0.219682	-0.595503	-0.533699	-0.557791	-0.180754	-0.381558	0.350813	-0.370247	0.0902166	0.0905018	0.762657	0.0997105	0.256989	-0.108966	0.388824	0	0.122551
C11orf49	-0.424129	-0.381687	-0.226413	0.0076468	-0.277221	0.337653	0.742845	0.252951	0.451665	0.870305	0.585335	0.183794	-0.432767	-0.435195	-0.15332	-0.556979	-0.079525
C11orf51	-0.713153	-0.871914	-1.04162	-1.03917	-0.337079	0.40775	0.510696	0.42279	0	0.656645	1.00368	0.782132	-0.705263	0.282306	0.0772161	-0.230932	-0.0983076
C11orf52	-1.13356	-0.433008	-0.749273	-0.13397	-0.782263	0.686725	0.688981	-0.259371	0.555088	-0.102428	1.32005	-1.00704	2.80303	1.80825	2.95928	1.61513	0
C11orf53	0	-0.268989	0.917117	-1.05815	0.672338	-0.536269	-0.0108929	-0.228593	-0.30669	-0.208578	-0.209967	0.213879	0.337543	1.03201	0.0419102	0.873185	0.46724
C11orf54	-0.270512	-0.567831	-0.534993	-0.334836	0.0211086	-0.434196	0.186652	0.158078	-0.0555015	0.11458	-0.0930362	0.285252	-0.139111	0.071671	-0.0769057	0.662044	0.354228
C11orf57	0	-0.247578	-0.314847	-0.321594	-0.381691	0.356131	0.442443	0.545596	0.396288	0.252887	0.381091	0.676155	0.0118685	-0.033102	-0.704216	-0.509781	-0.163542
C11orf58	-0.421536	-0.432725	-0.270693	-0.0409236	-0.00251245	-0.370509	0.498204	-0.201711	-0.101375	0.264151	0.463012	0.184293	-0.0698285	0.313756	-0.129956	0.661929	0.330352
C11orf61	-0.0962644	0.0436382	-0.215606	-0.533986	-0.637024	1.49616	0.574016	1.22065	0.993584	0.704169	0	1.01566	0.149003	-0.175712	-0.472493	-0.13651	-0.272044
C11orf63	0.373099	0.829531	0.442575	-0.322223	-0.296353	0.830319	0.0479248	-0.320121	0.537229	0.445517	-0.315635	-0.794592	-0.298317	-0.551241	1.00611	-0.346006	-1.35208
C11orf65	-0.0524688	0.0627246	0.00878191	0.244351	0.318124	0.739903	1.15107	-0.000284	0.800607	0.541637	-0.0896068	0	-1.90965	-1.11761	-0.930195	-1.43747	-0.625082
C11orf67	-0.523874	-0.89364	-0.760218	-1.16464	0.419091	-0.355847	0.179647	-0.164198	-0.416954	0.691771	0.700215	0.530694	0	0.702555	-0.264324	0.506913	0.348929
C11orf68	-0.568981	-0.598933	-0.523018	-0.635798	-0.300189	0.487178	0.912363	0.495466	0.716948	0.671246	1.03523	0.401594	-0.603128	-0.21627	0.125276	-0.18984	0
C11orf70	0.140882	1.20033	0.516638	1.74537	0.139302	0.688382	-0.594747	-0.405314	-0.56092	-0.459582	0.0618205	-0.895254	0.594432	0.512756	-0.876659	-0.118668	-1.12193
C11orf71	-0.161301	-0.992645	-0.134084	-0.418485	-0.00166702	0.308763	1.19793	0.0592184	0.860663	0.708902	1.48046	0.472446	-0.947577	0.861828	0	-0.0741615	-0.35284
C11orf73	-0.604278	-0.472328	-0.397153	-0.351624	0.226545	-0.240339	0.411371	-0.0564308	-0.0859766	0.193296	0.729561	-0.077961	0.284952	0	0.26217	0.220613	0.786904
C11orf74	-0.134001	-0.125982	-0.136742	-0.0608978	0.440631	-0.151569	0.4939	-0.110948	0	0.632876	0.546945	0.735577	0.358578	-0.4267	0.713189	-0.0498724	0.713458
C11orf75	-0.345205	-1.04906	-0.849111	0	-0.00570488	-0.117522	0.137755	-0.176901	0.342787	0.253107	1.35955	-0.0440044	0.550697	0.0403776	0.987067	-0.14058	0.277182
C11orf80	0	1.53869	0.321512	1.1182	-1.02335	1.56153	0.716166	0.727307	1.594	-0.36387	0.441267	-0.848104	-0.710986	-1.85924	-0.504539	-1.56414	-1.73223
C11orf82	1.58438	0.422584	0.325728	-0.501003	0.318367	0.511557	0.0656481	-0.204633	0.0552888	0.232489	-1.09372	-0.631322	0	-0.385042	-0.423646	-0.108618	-1.42073
C11orf83	-0.504386	-0.804088	-0.513923	-0.547486	-0.200494	0	0.266518	-0.0696249	0.505564	0.621684	1.08468	-0.150312	0.388699	-0.108605	0.780052	0.12959	0.165382
C11orf84	-0.754079	-0.819723	-0.809629	-1.01444	-0.863369	0.576295	0.631853	0.372774	0.42205	0.539887	0.670212	0.116398	0.0440922	-0.281027	-0.178174	0	-0.353295
C11orf85	0.0234709	0	-0.0705585	-1.33453	0.481564	-0.897869	1.52247	1.22213	-0.782047	-0.43329	-0.675275	2.01037	-1.22245	-0.388335	0.494065	0.105751	0.153832
C11orf86	-0.43306	-0.715248	-0.193743	-0.290416	-0.0476785	1.15847	1.98451	1.31886	1.50296	1.15572	1.62984	-0.384069	-0.505541	0.504858	0.0750098	1.5793	-0.488053
C11orf87	0.846933	0.430289	1.27043	1.4874	1.21407	-0.544613	0	-0.180628	-0.311396	-0.344938	-0.210302	-0.181712	-0.0112562	-0.662548	0.505033	0.697739	0.596214
C11orf88	-0.315891	-0.631369	-0.544816	-0.166493	-0.204623	2.91519	0.83401	1.1045	1.16612	2.13055	1.16928	-0.0805654	-0.194677	0	0.413644	0.0394297	-0.316377
C11orf9	0.00637531	-0.383923	-0.0513055	0.17753	0.251587	-0.744324	-0.243174	-0.00567745	0.0957742	-0.220839	1.23076	-0.21195	0.32582	0.197804	0.436314	0.136308	-0.148921
C11orf91	-0.477783	-0.313766	-0.950755	-0.246341	-1.05211	-0.0111465	1.75519	0.95007	1.05349	1.31007	1.78912	-0.0390811	0.947637	4.40585	-0.0223145	0.263729	0
C11orf92	0.556496	1.59642	0.329937	0.0536957	0.43508	-0.466256	-0.164262	0.494451	-0.264126	-0.507553	-0.365741	-1.20754	-1.29411	0.437841	-0.764273	0.181866	0
C11orf93	0.969206	1.09188	0.856595	0	0.960886	1.22502	-0.210073	1.00359	-0.876169	-0.113495	-1.30793	-0.035964	-1.60651	1.46397	-1.45336	-0.494169	0.297984
C11orf94	-1.44128	-0.534118	0.135868	-0.710332	0	0.417325	1.4319	-0.431213	-0.583187	-0.106071	0.455474	0.389889	0.798658	-1.24396	2.1196	0.866342	-0.16769
C11orf95	-0.317218	-0.552948	-0.320465	-0.424883	-0.0750251	-0.456801	-0.484371	-0.418736	-0.615771	-0.0930407	-0.582165	0.403656	-0.0319767	0.0497608	0.137038	0.200988	0.204172
C11orf96	0.0191431	1.19001	-0.620893	0.594266	-0.194519	-1.32556	-0.556335	-0.888674	-0.506401	-0.498457	1.89521	-1.31948	3.49897	2.21433	0.159728	3.05814	0
C12orf10	-0.200107	-0.452018	-0.298639	-0.213752	-0.0432777	-0.0947342	0.521819	0.159837	0.417494	0.36483	1.02964	0.477646	-0.0898113	0.0798559	0.141297	-0.0937309	0
C12orf11	-0.0711999	-0.0525589	-0.237018	0.201451	0.0939999	-0.0475702	0.24351	-0.279417	0.180879	0.303283	0	-0.0245299	0.246422	-0.261939	-0.67766	-0.0366309	0.0380464
C12orf12	-0.426673	-0.77041	-0.665386	0.513824	1.26813	0.588377	0.747462	0.524774	0.46562	0.653203	0.556412	-0.255028	-0.37568	-0.159893	0.187359	-0.175331	-0.490399
C12orf23	-0.333395	0.00131321	-0.276859	0.385693	-0.07763	-0.254226	-0.0381536	-0.101274	-0.399729	0.126786	0	-0.215893	0.138265	0.587545	0.243588	0.543859	0.540416
C12orf24	-0.288588	-0.238858	-0.706923	0.143868	-0.748082	0.0595875	0.713617	0.0158234	0.14208	0	0.0050602	-0.649158	-0.691776	-0.229488	0.239614	-1.29906	0.106901
C12orf26	0.178185	0.341907	0	0.18845	0.478815	-0.158679	-0.51246	-0.544815	-0.48699	-0.333702	-0.435587	-0.0382872	-0.373516	0.290831	0.287625	0.230525	0.239252
C12orf28	0.431487	-0.844791	-0.701989	-0.647405	-0.723789	0.553503	-1.66011	-0.0239744	-1.93521	0.473752	0.684842	2.53365	2.02084	-0.522401	1.15129	0.80329	0
C12orf29	-0.227335	-0.643772	-0.0624914	0.0688667	-0.157132	-0.180766	0.382849	0	-0.167232	0.421	0.0686684	0.154679	0.0993051	0.0654106	-0.534816	-0.590793	0.0859318
C12orf32	1.04201	0.630693	0.826318	0.941806	0.464492	0.114435	0	-0.174124	0.0202126	-0.00933218	-0.0902085	-0.158232	-0.662142	-0.255751	0.846403	-0.985644	-0.541435
C12orf33	-0.763982	0.43052	-0.303428	0.0872819	-0.975315	0.170181	0.0723305	0.091327	-0.0319707	-0.599489	-0.0277717	0.195041	-0.575191	-0.131028	0.204659	-0.106851	0.318047
C12orf34	-1.26783	-1.16597	-1.50153	-0.343795	-0.996103	0	-0.274764	0.00290203	-0.296711	0.0313044	1.78732	-1.27572	2.26803	0.500628	2.39761	2.18369	1.00372
C12orf35	1.51298	0.835897	0.711462	0.522219	0	1.02918	-0.364586	0.663674	0.411295	0.097847	-0.945647	-0.777999	-0.368481	-1.28053	-1.21896	-0.757246	-0.230203
C12orf36	-1.22349	-1.29262	0.231606	-1.10404	0	-0.414977	-0.0411067	-0.271217	-0.333277	-0.362712	0.335137	0.149145	0.134601	0.31164	0.365724	0.762332	1.00783
C12orf37	-0.268171	-0.62468	-0.181788	-0.142816	-0.151015	0.60476	1.35893	0.704765	0.636437	0.650478	0.71183	-0.0492516	1.02448	0	0.377098	-0.000563	-0.326666
C12orf39	-0.271342	-0.304763	-0.286488	0.142148	0.351973	2.63937	0.69392	0.6205	0.170422	0.459213	0.416798	0.337403	-0.230113	-0.416707	0.424104	-0.279979	-0.00541115
C12orf4	-0.0927429	0.142859	0	0.692999	0.00125504	-0.215992	-0.0129089	-0.205538	0.2637	0.16809	0.278606	0.0620918	-0.235852	-0.244026	-0.70854	-0.440352	0.0460024
C12orf40	-0.454725	-0.236169	-0.694417	-0.312061	0.0409853	0.535723	1.34501	0.50098	0.425915	0.783326	0.532641	-0.426625	-0.543433	-0.327185	0.0342851	0.0240209	-0.638239
C12orf42	0.340706	-0.318975	-0.744236	0.153376	-0.12981	0.650284	0.793759	0.788964	0.375583	0.668574	0.472435	-0.205284	-0.215188	-0.0227377	0.0237789	-0.373576	-0.445934
C12orf43	-0.194141	-0.0569925	0.190423	-0.109361	0.184062	-0.0315995	0.111455	-0.610392	-0.162012	-0.566406	0.428004	0.467113	0	0.119651	0.161276	-0.31226	0.0676675
C12orf44	-0.540749	-0.0985136	-0.148172	-0.410941	-0.0147982	0.108069	0	-0.266609	0.027216	-0.239839	0.777877	-0.349923	1.01661	0.767731	0.559029	0.933232	0.155285
C12orf45	0.0299768	0.319525	0.194823	0.162649	-0.0943079	-0.118023	0.148879	-0.14102	0.0221739	0	0.556181	-0.254327	-0.212641	0.0178633	-0.525876	-0.435731	-0.561172
C12orf47	-0.443153	0.10258	-0.108361	0	0.018816	0.518317	0.434825	-0.0366654	-0.28834	-0.356179	0.409447	0.100031	0.00676251	-0.0366459	0.222045	-0.161137	-0.665602
C12orf48	0.0115676	0.113998	0.0608698	0.166211	-0.328989	0.142888	-0.126039	0.38484	0.389675	-0.084978	0.31994	-0.488211	-0.0715205	-0.452441	-0.451994	-0.276695	-0.922437
C12orf49	0.362199	0.0483594	0.399202	0.548856	-0.00315762	-0.0363445	-0.66709	-0.36806	0.00518704	-0.586461	1.39793	-0.119887	0.649989	0.445819	-0.377423	0	-0.590198
C12orf5	-0.121763	-0.397278	0	0.147528	0.0805812	-0.135007	0.366883	-0.0201712	-0.228421	-0.0712142	0.20282	-0.607134	0.57425	0.383952	-0.9263	1.35086	0.271598
C12orf50	-0.587598	-0.938341	-0.779238	-0.447172	-0.411867	0.231844	0.626512	0.661828	0.289057	0.375763	0.412146	1.2047	0.257591	0.274579	0.0573213	-0.12504	-0.35271
C12orf51	-0.222642	-0.0151377	-0.124237	-0.087121	-0.0267076	0.289032	0.0584033	0.367715	0.560104	0.310475	-0.307957	0.0529881	-0.331508	-0.744303	-0.0249453	-0.23116	0.0896997
C12orf52	-0.562712	-0.626708	-0.355575	-0.568041	-0.0453825	-0.351354	0.417354	0.12447	0.420253	0.195342	1.22558	0.661807	0.297475	-0.14659	1.10969	0.526253	0.166015
C12orf53	0.647423	1.24638	2.04105	-0.268247	0.690985	-0.410419	0.110767	0	-0.190543	-0.111877	-0.0815973	-0.0113964	0.680561	-0.802661	-0.435246	2.90687	1.59132
C12orf54	-0.14554	-0.0128436	-0.233686	-0.18766	-0.124225	0.671121	0.56464	0.169582	0.650141	0.949287	2.9123	0.238098	-0.245346	-0.770879	-0.499897	-0.876844	-0.0829272
C12orf56	0.277276	0.172704	-1.37528	1.40049	1.25141	-0.410176	0	-0.215437	-0.280668	-0.0537405	-0.169239	-0.103747	0.487149	0.948557	1.87288	-0.861365	1.05765
C12orf57	-0.818997	-0.855144	-0.418002	-0.277505	-0.315449	0	0.715336	0.138363	0.103078	0.602612	0.696849	0.0325232	-0.665159	0.0947571	-0.261011	0.150866	-0.0831842
C12orf59	-0.790884	-0.271404	0.31354	-0.632976	0.24706	0	0.409152	0.216933	0.0900397	0.0681167	3.78849	0.0430379	-0.719039	-0.519712	-0.191888	-0.225303	-0.825137
C12orf60	-0.238128	-0.323312	-0.323778	0.022263	-0.11942	0	0.184168	0.54664	-0.539724	0.707171	-0.193928	0.472226	-0.546858	1.04439	-0.044786	0.650896	0.767304
C12orf61	-0.903452	0.077672	-1.16917	-0.770947	-0.747887	0	0.281073	0.0626254	2.73273	0.0697861	0.0883489	0.614147	-0.961564	-0.474718	0.129928	-0.155906	-1.06518
C12orf62	-0.668492	-0.715353	-0.609978	-0.654164	0.0969257	-0.34321	0.104955	-0.389717	-0.140735	-0.106438	0.907767	0.00416088	0.458416	0.39815	0.443687	0.486435	0
C12orf63	0.0934866	0.27006	0.289175	0.00327683	-0.170845	0.478619	0.660929	0.414199	1.15889	1.26985	0.31658	-0.424513	-0.697571	-0.48867	-0.130556	0.616	-0.818143
C12orf65	-0.130352	-0.274935	-0.270057	-0.483614	0.0795031	0.0333138	0.261243	0.0124931	0.365492	0.71361	-0.0568781	0.131007	0.701002	-0.75929	0	-0.417286	-0.0683165
C12orf66	0.00489593	-0.361332	-0.0931785	-0.00583625	-0.269274	0.105224	0.563372	-0.334153	0.0679445	0.097744	0.421793	0.104738	-0.759569	-0.0841017	-0.371085	0.0619833	-0.343394
C12orf68	-1.21843	-1.20701	0	-0.26471	0.00745869	-0.610687	1.39631	-0.269723	-0.347449	0.210761	-0.252767	-1.09762	0.254197	1.20305	1.10937	0.483406	0.631398
C12orf69	-0.101727	-1.12546	1.22349	0.30068	0	-0.125783	0.422855	0.182319	0.141524	0.244377	0.233406	-0.577133	-0.427385	-0.520554	-0.146126	0.190954	-0.847348
C12orf70	0.0357776	0	-0.729986	0.665151	-0.44059	-0.164257	-0.392057	0.0544934	-0.633029	-0.682109	-1.90022	-0.0250545	0.337532	1.21336	0.355653	2.38229	0.326375
C12orf71	-0.279708	-0.656486	-0.552508	-0.15975	-0.169987	0.382908	0.894774	0.668436	0.599159	0.624362	0.689227	-0.066648	-0.205773	-0.0111027	0.371325	0	0.127752
C12orf73	-0.536837	-0.443604	-0.504414	-0.0648594	0.218943	-0.390626	0.615521	0	0.271149	0.228179	0.742462	0.32641	0.351557	-0.179481	-0.514061	-1.47117	0.19694
C12orf74	-0.133468	-0.466154	-0.378323	0.00965118	-0.00236797	0.513299	1.01432	1.11777	0.727646	0.837961	0.832319	-0.0862651	-0.215603	0	0.373877	-0.0289302	-0.320525
C12orf75	2.14084	1.2864	0.231571	1.2872	0.0454755	0.540763	-0.800948	0	0.452071	0.175647	-2.3003	-2.15101	-0.161386	-2.56869	-1.27343	-1.86537	-1.57986
C12orf76	0.469593	0.251113	1.33378	0.0102298	-0.16334	0.0401456	0.040591	0.685193	-0.0238686	-0.0412328	0.723468	-0.240599	-0.462541	-0.843692	-0.0815623	-1.16277	-0.744976
C12orf77	-0.172594	-0.525613	-0.412565	-0.0390048	0	0.567073	0.997257	0.769887	0.715797	0.846467	0.827748	-0.0933576	-0.21461	0.00669718	0.374319	-0.0271406	-0.292989
C13orf15	-0.357613	-0.256174	0.177702	0.202	0.314015	-0.0614147	-0.321501	0.653741	0.212896	-0.0246859	-0.0569582	0	0.0207329	0.253582	-1.36592	-1.01557	0.0360127
C13orf16	-1.02782	0.408864	0.0720568	-0.758985	-1.21464	-0.0653162	-0.324567	0.945865	0.886968	0.901922	-0.282611	0.697307	0.642996	-0.313723	0	-0.175047	0.526142
C13orf26	-0.144248	-0.48682	-0.360866	0.00237513	0	0.579573	1.00669	0.822861	0.717837	0.776627	0.832673	-0.104758	-0.227869	-0.0154114	0.325288	-0.0425606	-0.339551
C13orf27	-0.727373	-0.497095	-0.265856	-0.0896015	-0.400515	-0.308937	0.268185	-0.163292	-0.192244	0.198538	0.192541	0.156908	0.835105	0	0.206659	0.529708	0.461826
C13orf30	-0.260516	-0.605082	1.39765	-0.147082	-0.0990877	1.00242	1.76808	0.6695	0.595307	0.7125	0.716459	-0.12171	-0.214633	0	3.46505	-0.0283685	-0.311432
C13orf33	0.0837841	0.953878	0	-0.946811	0.341675	1.34802	-0.866386	-0.178669	-0.33106	-0.590487	3.29482	-0.426401	3.78394	3.38531	-0.461989	3.66373	-0.598706
C13orf35	-0.710941	-1.02859	-0.944592	-0.567242	-0.58228	1.10323	0.46604	0.282174	0.191674	0.491972	0.260102	0.456302	-0.588172	-0.117043	0	-0.359628	0.340843
C14orf1	-0.346872	-0.134138	0.461956	-0.23759	0.138759	0.0458832	0.70874	0.190511	0.113593	0.303636	0.493387	-0.168804	-0.852808	-0.506744	-0.0697463	-0.70928	0.167017
C14orf101	0.86605	0.875573	0.557175	0.579462	0.259946	0.10655	-0.385458	-0.110294	0.0131664	0	-1.08061	-0.112658	-0.0363112	-0.510339	-0.706686	-0.55339	0.247502
C14orf102	-0.276687	-0.0794959	-0.0994463	-0.302617	-0.122601	0.787648	0.514414	0.141689	0.306626	0.333593	-0.0314283	0.238042	-0.373413	0	0.398815	-0.5981	0.367897
C14orf105	-0.173471	-0.541215	-0.437041	-0.0418992	-0.0581713	1.71339	0.992603	0.767487	0.70256	0.725392	0.795043	-0.0371604	-0.19402	0.0199709	0.402791	0	-0.301045
C14orf109	-0.41285	-0.189755	-0.157835	-0.134945	0.594676	-0.420888	0	-0.410923	-0.577362	-0.29433	1.12903	0.055048	0.720922	0.223083	0.476827	0.492705	0.552562
C14orf118	-0.0691271	0.277584	0.40832	0.0052228	-0.262451	-0.247375	-0.56682	-0.159415	-0.0468662	-0.28829	-0.561656	-0.192366	0.114856	0.00100613	1.05144	-0.370656	-0.531883
C14orf119	0.667858	0.268447	0.710806	0.42131	-0.719991	-0.689327	0.353061	-0.357119	-0.460417	-0.541214	-0.375127	-0.0928245	1.0488	0.041296	-0.0172806	0	0.479889
C14orf126	-0.0693312	0	-0.365901	0.0330563	-0.213282	0.261053	0.339372	0.621739	0.33182	0.432144	0.487173	0.224675	-0.648829	-0.0648828	-0.0125146	-0.478334	-0.175337
C14orf128	-0.452044	-0.256022	-0.37541	0.204338	-0.14753	0.127441	0.696198	-0.270243	0.168008	0.804644	0.3592	0.510065	-0.738936	-0.546329	1.25401	-0.697128	0.655316
C14orf129	-0.0488348	-0.0297155	0.0303507	-0.130857	0.192809	-0.389865	0.197463	-0.491611	-0.15779	0	0.534329	-0.269039	0.122895	0.140522	-0.178474	0.0329933	0.0296154
C14orf132	-0.537087	0.713703	1.29878	0.555499	-0.626214	2.11385	1.0597	-0.300978	1.31781	0.809838	-0.167695	0	-2.4796	-1.3139	-0.287187	-0.690684	1.37593
C14orf133	0.149112	-0.347518	-0.125134	0.00368977	-0.0539513	0	0.430622	0.334868	0.210242	0.220875	0.328393	0.439521	-1.2324	-0.890497	-0.33967	-1.50211	-0.238542
C14orf135	-0.0961564	0.317046	-0.256498	0.251511	-0.129951	0.669811	-0.213008	0.111184	0.164845	0.335682	-0.352034	0.149408	-0.266753	0.244479	-0.0834355	0.214782	-0.299872
C14orf142	-0.732523	-0.456304	-0.41109	-0.0701323	0.261423	0.631137	-0.117315	-0.0548577	0.241903	0.04599	0.545836	0.244718	-0.192436	-0.40935	0.146768	0	0.644161
C14orf149	-0.49153	0.159542	0.243351	0.0266418	0.295892	-0.303108	-1.16572	-0.231981	-0.420936	-0.516962	0	-0.188794	0.397415	0.161406	0.426926	0.930523	-0.194264
C14orf159	-0.541656	-0.704046	-0.638495	-0.462742	-0.00107146	-0.0169945	0.541238	0.291072	0.450761	0.41327	0.526738	0.228698	-1.06826	0.0978046	-0.118541	-0.185774	0.029346
C14orf162	0	0.0877552	0.800007	0.553983	0.816647	-2.03168	-1.27499	-1.48444	-1.28961	-0.958511	-2.06784	-1.59844	-0.259781	0.621573	0.848584	0.0651064	0.0792084
C14orf165	0.130391	-0.0785148	0.0747492	-0.167822	0.858417	-0.215304	0.0886331	-0.114423	0.034389	-0.16187	-0.134023	0.136764	0.641214	-0.71775	0.0355566	0.456076	-0.270609
C14orf166	-0.451362	-0.662289	-0.484353	-0.224381	-0.0683289	-0.332753	0.452157	-0.324807	0	0.15623	0.476058	-0.331148	0.0659151	0.503272	0.0315599	0.446686	0.429016
C14orf166B	-0.118019	-0.465223	-0.351002	1.12088	0	8.15023	1.05029	0.872885	0.757854	0.664094	0.832338	-0.10494	-0.236862	-0.044189	0.363801	-0.0474424	-0.350332
C14orf167	0.207809	0.387305	0.0393832	-0.0508687	0.569648	-0.200754	-0.419337	-0.708005	-0.377563	0.119633	-0.871451	0.100135	-0.595214	-0.288813	0.362301	-0.868254	-0.0401101
C14orf169	0.227557	-0.0011406	0.304099	0.523827	0.0496941	-0.263731	0.33479	-0.0753527	0	-0.0792599	0.00839138	-0.0108538	-0.409848	0.391821	0.152871	-0.025178	-0.0908518
C14orf176	-1.04254	-0.269908	-0.228583	-0.254954	-0.11993	0.135031	0.478795	0	1.24025	0.849938	0.559326	0.381875	-0.545101	-0.367337	0.671727	-0.642126	0.243488
C14orf177	-0.121529	-0.471284	-0.353732	0.0155401	0	0.504516	1.04628	0.865789	0.757218	0.660271	0.833393	-0.111219	-0.245833	-0.0520573	0.349271	-0.0578079	-0.357982
C14orf178	0.369395	-1.47046	0	-1.48621	0.207631	1.23306	-0.459301	-0.667335	0.058732	-0.766108	0.0375052	-0.0143394	-0.249212	1.85645	0.156698	0.236468	-1.76929
C14orf180	-1.11992	-1.46347	-0.51636	-1.10999	-0.660068	0.33858	0.986275	0.333764	-0.265265	0.524459	0.468533	0.85493	-1.50237	1.24999	-0.0582085	0	0.0761337
C14orf182	0.923665	1.61055	1.03298	0.332374	-0.425702	0.935045	0.0947554	0.646066	0.620362	0.823107	-0.263318	-0.939284	-1.24503	-1.04573	-0.709619	-0.422495	-0.869529
C14orf183	-0.341912	-0.688796	-0.56656	-0.196527	-0.188606	0.425307	0.798228	0.589527	0.516163	0.7422	2.0867	-0.309336	0	-0.195718	0.141015	0.739837	-0.528285
C14orf2	-0.505015	-0.635764	-0.534213	0	0.402859	-1.45684	0.121889	-0.258026	-0.148892	0.17721	0.555027	0.12921	0.648514	-0.268714	0.713689	-0.276997	0.264436
C14orf21	0	-0.656623	-0.144286	-0.265117	-0.201329	-0.354133	0.165915	0.0939598	0.455605	0.0822554	0.826078	0.276083	0.142147	-0.126819	-0.505007	0.751462	-0.230683
C14orf23	-0.471447	-0.651473	0.866324	-0.332821	-0.326931	0.179602	0.709019	0.507399	0.403715	0.405905	0.502649	-0.0262033	0.182032	-0.271716	0.0947844	-0.28964	-0.586378
C14orf28	0.477187	0.473503	0.556577	0.382431	0.87356	-0.30307	-0.0183578	-0.371643	-0.95024	-0.262881	-0.87231	1.01506	-0.89585	0	0.982542	-0.260097	1.21934
C14orf33	-0.65929	-0.390278	-0.253112	-0.109342	0.396124	-0.462251	0.652752	0.0892563	0	0.427676	0.402439	0.937576	-0.660794	-0.19049	0.32002	-0.208861	0.122847
C14orf34	0.404393	-0.641853	-0.541742	-0.148789	-0.153266	0.454898	0.919484	0.679596	0.631732	0.585147	0.710972	-0.053359	-0.204354	-0.0071764	0.37893	0	-0.325307
C14orf37	0.249974	-0.20446	0.0219116	0.615653	-0.461739	-0.242465	0.761823	0.4008	0.447365	0.456774	-0.290303	0.818285	-0.430654	-1.30446	-0.429531	-0.271614	0.0954683
C14orf39	-0.192817	-0.540952	0.0681672	-0.0578542	-0.018373	0.516925	0.98196	0.756161	0.69512	0.780401	0.806781	-0.1015	-0.217552	0	0.363225	-0.0344172	-0.296749
C14orf41	-0.0565729	0.385742	0.310766	0.728662	0.345125	-0.41307	-0.801446	1.15224	0.412374	-0.623355	-1.73422	-0.12773	0	0.274331	-0.366136	0.176997	-0.0652833
C14orf43	-0.155613	0.00186062	-0.0228348	0.0941858	-0.170974	0.451047	0.530826	0.236876	-0.0285311	0	0.18364	0.292543	0.338644	-0.172442	-0.498987	-0.538551	-0.323495
C14orf45	-0.517213	0.217577	-0.342613	-0.0165346	-0.165902	0.214073	0.587189	0.25406	0.810029	0.591734	0.440798	0.556404	-1.78876	-1.51729	-1.0952	-0.859709	-1.32738
C14orf48	-0.869909	0.250369	-0.306127	-0.25041	0.54218	0.592103	0.21226	0.15257	-0.0285306	0.363435	1.36443	-0.150549	-0.0490281	-0.318834	0.534432	-0.0468249	0.0325815
C14orf49	0.905462	0.979221	1.18002	0.961521	0	0.00500298	-0.423209	-1.75033	-0.151646	-1.24951	-1.73532	-0.0179715	-0.375414	0.374648	0.182632	1.01909	-0.34746
C14orf56	0.0895867	0	0.183853	1.19748	0.625893	-1.23542	-1.5749	-0.890765	-1.01571	-1.49233	-0.964881	0.380682	-0.111199	0.880759	0.240373	1.29779	-0.0407419
C14orf64	0.0160484	-0.929898	-0.310266	-0.471124	-0.414128	2.68269	0.58256	0.34365	1.12646	1.41274	0.396326	-0.115594	-0.384565	-0.324905	0	0.163923	-0.274188
C14orf70	0	-0.145755	0.759692	0.104815	0.0976801	-0.466255	-0.207644	0.391009	-0.203541	-0.230897	0.0918827	0.0901794	-0.178244	0.65283	-0.137202	0.278846	-0.0693464
C14orf79	-0.85804	-0.407314	0.117204	-0.260372	-0.67923	1.0627	0	-0.502311	-0.792664	0.191479	1.48386	0.205776	0.370998	0.117415	-1.55736	-1.9946	0.529371
C14orf80	0.229126	0.0880671	0.00442219	-0.377626	-0.578898	0.461355	-0.01331	0.307318	1.24968	0.426472	0.32857	-0.479213	-1.13944	0.374199	0.00558209	-1.01503	-1.40854
C14orf81	-1.35606	0.430925	0.266379	0.931514	-0.37265	-0.57883	-0.191351	0.289706	0.159382	-0.541934	-0.404924	-0.162016	0.353992	-1.19994	0.345265	0.717027	0
C14orf82	1.15098	1.03534	0.830267	-0.910668	-0.362762	0.410997	0.760067	-0.149078	0.615698	0.0847092	-0.0920825	0	-1.05711	-0.234835	-0.0853066	0.119122	-0.613046
C14orf86	-0.163633	-0.441148	-0.142696	-0.0254116	0	1.14876	0.966743	0.748273	0.692431	1.13073	0.810476	-0.092782	-0.0608578	0.0347042	0.352734	-0.0118337	-0.311462
C14orf91	0.208621	1.85889	-1.84211	1.29105	-0.483857	-0.168887	-0.178089	0.537394	-0.143628	0.699398	-0.586008	1.78822	-0.482966	0.946514	1.82263	-1.23284	0
C14orf93	0	-0.411962	-0.229022	-0.561799	-0.200002	0.269418	0.262585	0.133936	0.156641	0.28393	-0.04949	0.0773659	-0.37182	-0.608225	0.320454	-0.847897	0.113153
C14orf99	-0.843979	0.334776	1.20214	0	-0.057704	1.12735	0.538568	1.27929	-0.823341	0.948857	-0.720904	-0.142044	-1.71721	-1.50798	0.266682	-1.5242	1.10683
C15orf17	-0.587498	-0.686093	-0.392576	-0.570319	0.30269	-0.0815849	0	-0.450735	-0.490619	-0.482507	0.932719	0.599813	0.641915	0.920665	0.472642	0.59677	0.363148
C15orf2	0.653039	1.3874	0.337708	0.414254	0.00428772	-0.795118	-2.11353	-0.997462	-1.35216	-2.54782	-2.49696	-0.76701	1.21767	0.275252	0	-0.0796537	0.323247
C15orf23	-0.418778	-0.624066	0.639737	-0.0713415	-0.115839	0.682543	0.00721073	0.0359602	0.12403	0	0.508568	-0.216099	-0.0612249	-0.216029	0.411904	-0.139479	1.1718
C15orf24	-0.282082	-0.524004	-0.312032	-0.157046	0	-0.354243	0.349018	-0.377261	-0.236713	0.242493	0.747916	-0.268303	0.415504	0.4297	0.416518	0.51407	0.22668
C15orf26	-1.56132	-0.216994	0.160023	0	0.946222	-0.802409	0.17064	0.871748	-0.150358	-0.47181	0.841111	0.332632	0.559196	0.864762	-0.368981	-0.0156589	-1.08896
C15orf27	1.18505	1.0314	0.769983	-1.44762	1.05931	-0.53195	0.0668783	-0.621702	-0.743867	-0.615892	0.814664	0	0.463185	0.569593	-1.07984	-0.314994	-1.73066
C15orf29	0.169359	0.387837	0.00272465	-0.282751	0.563581	0.370568	-0.37582	0	0.295416	0.402965	-0.398959	0.487314	-0.329218	-0.292612	-1.13302	-0.0656247	-0.153217
C15orf32	-0.484515	-0.853457	-0.751548	-0.351359	-0.321973	0.276105	0.695228	0.471986	0.416626	0.503746	0.518778	0	-0.56962	-0.350261	0.695992	1.71433	-0.659355
C15orf33	-0.287701	-0.356923	-0.0554538	0.192882	-0.424735	0.390018	0.104683	0.898988	0.177593	0.0329044	0.0850842	0.451391	-1.173	-1.87379	0.0960319	-0.545472	-1.09356
C15orf34	-0.151628	0.0211859	-0.400178	-0.0180645	0	2.09577	2.1772	2.01304	2.20681	1.0288	1.78599	-0.127476	-0.250824	-0.0374284	0.864076	-0.0539489	-0.330976
C15orf37	-1.37678	-0.136861	0.211654	-0.0154819	0.187397	-0.887804	0.0727015	-2.01393	-2.07679	-0.864319	0	0.20394	-0.162792	1.23869	1.17543	0.127485	0.625234
C15orf38	0.0512137	-0.164262	0.434531	0.0693889	0.527326	-0.0371947	0	0.0376468	-0.0113187	0.382168	0.255351	0.0917363	-0.515108	-0.108098	-0.245533	-0.864184	-0.0916228
C15orf39	-0.206594	-0.434441	-0.0845947	0.0231199	-0.100452	-0.181216	0	0.158821	0.524824	-0.00940037	1.58605	0.522056	0.992651	1.08067	-0.197537	1.42933	-0.4763
C15orf40	0.0530863	-0.0144978	-0.0167341	0.238817	0.268805	0	0.162324	-0.197722	-0.153881	0.104034	-0.00428391	-0.217964	-0.359034	0.171597	0.537764	0.385807	-0.16995
C15orf41	-0.835868	-1.94973	-0.879527	-0.77657	-1.08899	-0.361638	0.243175	0	-0.383677	0.824368	0.739292	0.220378	0.490314	0.121998	-3.39753	0.873454	0.0893459
C15orf42	-0.237557	-0.570743	-0.447898	-0.105517	2.9484	0.524454	0.910452	0.699937	0.615809	0.854171	0.743076	-0.127471	-0.224229	0	0.307951	-0.0357647	-0.331142
C15orf43	-0.507754	-0.794099	-0.69772	-0.33803	0.062839	0.191671	0.671875	0.494443	0.331109	0.539062	0.396029	-0.445449	-0.566878	0.273776	0	-0.359713	-0.627948
C15orf44	-0.211704	-0.437489	0.126541	-0.0101848	-0.15485	0.568267	0.534312	0.591138	0.455237	0.161338	0.507224	0.182352	-0.325912	-0.0585704	0	-0.190858	-0.174613
C15orf48	3.33118	2.12364	2.2711	4.20957	0	0.301875	-2.33618	1.14638	1.91541	-2.59369	-1.18695	-3.42541	1.32901	-1.5214	-2.95981	-0.297209	-3.62108
C15orf5	0.426802	0.310241	-0.518424	0.0175028	-0.537022	-0.179697	-1.24738	-0.746379	-0.012332	-0.833849	-3.38579	0	0.278343	0.441199	0.170175	0.909175	0.22954
C15orf50	-0.661156	-0.997231	0.220344	-0.247096	-0.475585	0	0.536514	0.311224	0.229345	0.205365	0.336951	1.20783	-0.599766	-0.399175	-0.0488701	0.658588	-0.696881
C15orf52	-0.708817	0	-0.248112	-0.532729	0.0174589	0.86703	-0.100794	0.118326	-0.706601	0.706471	-0.187891	-0.341384	-0.106041	0.393949	1.00339	0.358043	0.804404
C15orf53	3.18441	1.26258	1.84401	1.56557	-0.241296	-0.475089	-0.185373	0.162519	0.64343	0	-0.337321	-1.2305	2.40214	1.36499	-0.781219	-1.16754	-1.47094
C15orf54	-0.170965	-0.547226	-0.439741	-0.041883	-0.0132976	0.62034	0.992642	0.768777	0.720651	0.964656	0.828598	-0.0914307	0.271385	0	0.366107	-0.0266213	-0.329329
C15orf55	-0.244125	-0.589576	-0.0324335	-0.11606	-0.100999	0.809011	1.39527	0.867612	0.765025	0.714057	0.889132	0.383704	-0.216326	0	0.347178	-0.0243063	-0.323693
C15orf56	-0.255724	0.64003	-0.583362	-0.351936	0.16244	0.575073	0.892587	0.575388	-0.46406	-0.531476	-0.380838	1.72659	-1.4585	0	3.25897	-1.25872	1.12342
C15orf57	-0.272747	-0.369634	-0.493812	-0.30577	-0.273187	-0.256273	0.551835	0.0134172	0.505592	0.101171	0.0944872	-0.143981	0.470348	-0.178112	0.419999	0.103819	0
C15orf58	-0.52597	0	-0.54612	-0.117827	0.351705	-0.299984	0.815073	-0.366261	0.59276	0.513824	0.11739	0.141484	-1.37338	-0.225461	0.465937	-1.80784	0.0145903
C15orf59	-1.18276	-0.310182	-0.624877	-0.588709	0.28097	-0.413046	0.103966	-0.431979	0	-0.297256	1.21349	-0.442196	0.896381	1.11673	1.51371	0.878776	0.894478
C15orf60	-0.0810227	0.881976	-0.746723	0.190581	-0.0386386	0.540488	-1.37927	-1.30927	-1.21942	0.0933614	-0.0551357	0	-0.884817	0.734474	2.01896	0.677724	0.953947
C15orf61	-0.414948	-0.0909328	-0.212153	-0.00208092	0.844923	-0.516359	-0.123158	-0.266014	-0.204272	0	1.07357	0.207484	0.689719	0.518162	0.918919	0.784003	0.916296
C15orf62	0.685171	-0.55213	-0.252198	0.495331	0.135736	-0.432332	-0.265135	-0.47498	-1.06392	-0.559775	-0.589233	-0.231089	-0.145298	-0.0573976	0.110505	0.0235884	-0.270543
C15orf63	-0.406124	-0.515261	-0.576422	-0.277147	-0.166097	-0.102251	1.22757	0.134282	0.188261	0.196901	0.518164	-0.216444	0.0543468	0.096761	-0.145782	0.666975	-0.233534
C16orf11	-0.236751	-0.608811	-0.502257	0.302975	-0.109382	0.431675	0.936756	0.726765	1.60306	0.753594	0.735213	-0.0759878	-0.20676	0	0.362458	-0.00571156	-0.335073
C16orf13	-0.259542	-1.00281	-0.499006	-0.652458	-0.351831	-0.177228	0.658314	0	0.267003	0.521963	0.693053	0.43257	-0.581542	0.181586	0.0988674	-0.236328	0.26623
C16orf3	-1.07443	-0.145525	-1.1949	0.239391	0.864556	-0.885602	-0.895823	0.321752	-1.1954	-1.19213	0	0.0992117	0.31675	0.389813	-0.707676	0.300088	0.408216
C16orf42	-0.797835	-0.625707	-0.702511	-0.700567	-0.326032	-0.0329008	0.542388	-0.0152531	0.0831394	0.225185	0.657119	0.132739	-0.517184	0.195612	0.539617	0	0.384133
C16orf45	-0.533855	-0.625643	-0.26357	-0.578092	-0.0711851	0.128799	0.507563	0	0.277371	0.820106	1.2626	-0.343273	0.20933	0.0218687	-0.296775	0.760299	-0.0729885
C16orf46	-0.185387	-0.550432	-0.446465	-0.0521698	0.124651	0.527987	0.999675	0.788319	0.704459	0.783227	0.792447	-0.0857906	-0.212021	0	0.361419	-0.0139399	-0.326022
C16orf47	1.00842	0	1.21336	0.177539	0.0248718	0.505724	0.145653	0.323046	-0.125514	0.131346	-0.0170193	-0.936893	-1.07225	-0.844719	-0.479216	-0.872374	-0.947856
C16orf48	-0.423851	-0.575258	-0.407758	-0.294038	0.0476303	0.405125	0.702827	0.284324	0.113276	0.778654	0.223779	0.137658	-0.273631	-0.828701	0	-0.669189	-0.265449
C16orf5	-0.0649652	0.0388131	0.18132	-0.0584054	0.338507	-0.563328	0.0770483	-0.402618	-0.211752	-0.19627	0.351202	-0.0681167	0.639845	0.0878739	0.203597	0.0103283	0.340667
C16orf52	-0.359939	-0.22968	-0.426362	-0.230125	0	-0.730927	0.26546	-0.109878	-0.127414	0.417702	0.603157	-0.613454	0.392745	0.601029	0.842963	1.02055	0.518592
C16orf53	-0.16091	0.140942	-0.16769	0.21831	0	-0.00529623	-0.20991	0.0441494	-0.0780759	-0.267296	0.233253	-0.0868406	0.21734	0.632157	-0.0896812	0.418133	0.190187
C16orf54	2.86372	2.04285	1.94306	1.85603	0.533334	1.46177	-0.611692	1.3058	1.05211	0	-1.12265	-2.59495	-1.47364	-1.33357	-4.52063	-0.951102	-3.6847
C16orf55	-0.0293789	0.875907	-0.156395	-0.334471	-0.109668	1.3888	-0.564247	0.824922	0.152078	0.792897	-0.0899806	-1.35334	0.508363	-0.491025	0.0769019	0.502606	0
C16orf57	-0.166443	-0.378762	-0.36976	0.0454903	-0.445794	-0.278542	0	-0.155489	-0.126121	0.0312796	0.363255	-0.537598	0.259456	0.115992	0.489935	0.517744	0.235798
C16orf58	-0.112401	0.147365	0.0295553	-0.133111	-0.332194	0.57174	0.467795	0.329437	0.511154	0.431462	0.416486	0	-0.782397	-0.265347	-0.00675201	-0.957365	-0.634644
C16orf59	-0.28526	-0.511279	-0.415939	-0.27327	-0.17963	0.253829	0	0.304102	0.282184	0.538988	0.445511	0.883264	-0.917832	-0.838239	0.793447	-0.485942	0.337318
C16orf61	-0.84483	-0.6222	-0.786563	-0.456339	0.121146	-0.557712	0	-0.28789	-0.155336	0.0717545	0.976405	-0.223891	0.535711	0.015152	1.04588	0.79558	0.607895
C16orf62	0.70935	0.543751	0.590597	0.123938	0.165428	-0.418561	-0.566825	-0.515204	-0.0709977	-0.0285826	0.215454	-0.235293	-0.433712	0	0.580345	0.178772	-0.151789
C16orf7	0.00141907	-0.335372	-0.129376	-0.0803151	-0.0991607	-0.286293	-0.207046	0.597411	0.33956	0.358834	0.402575	-0.0498166	0.0738325	-0.00926876	0.39697	0.0367889	0.31907
C16orf70	-0.399245	-0.382592	-0.0377741	0	-0.0814629	0.42021	0.416918	0.299599	0.353638	0.248982	0.262911	-0.123981	-0.147018	-0.463164	0.0222979	-0.546037	0.0673838
C16orf71	0.873751	0.0921707	-0.0581789	-0.0618534	-0.870277	-0.255942	-0.165213	-0.359259	0	0.514674	0.437808	0.868166	0.813695	-0.127782	-0.83068	0.792017	0.697237
C16orf72	-0.31704	-0.481068	-0.418651	-0.297652	-0.130595	0.739639	0.415774	0.335578	0.469837	1.0703	0.387338	-0.0130744	0.489759	0	0.0671496	0.561151	0.0275855
C16orf73	-0.547971	-0.900858	-0.786956	0.011919	-0.374919	0.193789	0.620929	0.393268	0.340103	0.478388	0.451691	-0.467161	-0.440234	-0.365553	0	0.981364	-0.66652
C16orf74	-0.00409079	-0.298661	0.0628881	-0.179741	0.395075	0.313805	0.450244	0.57789	0.382196	0.299652	0	0.352603	-0.789534	-0.174667	-0.18578	-0.47404	-0.286205
C16orf78	0.089942	0	-0.212839	-0.394209	0.255446	-1.18175	-1.03307	-0.682325	-0.0617042	0.00800133	-1.83411	0.876821	0.0624681	-0.164356	0.304461	0.160419	0.372355
C16orf79	0.296062	-0.116212	-0.067172	-0.227911	-0.202738	1.12262	0.997475	1.41666	1.16819	0.554842	-0.412737	0.574591	0.590838	-1.18103	-0.0753784	-0.600475	0
C16orf80	-0.416004	-0.533872	-0.324675	-0.409493	0.435134	-0.450451	0.0662413	0	-0.105737	0.0091362	0.365985	0.130157	0.249646	-0.171477	0.00532055	-0.326214	0.258757
C16orf82	-0.329163	-0.667391	0	-0.184793	-0.222239	1.72212	1.81319	1.81624	2.22354	1.40594	1.97796	0.378527	-0.362519	-0.149769	0.242022	-0.169565	-0.473377
C16orf86	-0.293984	-0.706424	-0.17932	-0.0663455	0.0981719	0.469288	-0.398287	-0.0390208	-0.0816598	-0.209686	-0.454999	0.460653	-0.538464	0.313716	0.686704	0.0146854	-0.0526276
C16orf87	-0.68904	-0.640309	-0.297599	-0.348907	-0.206964	0	0.625003	0.187236	0.151543	0.688152	0.0483141	0.461156	-0.271709	-0.632847	0.0444174	-0.877719	0.0226011
C16orf88	-0.0555677	0	-0.277142	-0.103221	0.197389	0.642646	0.644285	-0.371353	-0.192339	0.439813	0.587889	1.23453	1.21268	-0.355601	-0.520104	-0.291613	0.0680351
C16orf89	1.50877	0.858003	1.04361	-0.326368	-1.632	1.25335	1.14367	1.11394	0.895801	1.59913	0	-0.785899	-2.37886	-3.00534	-0.69446	-3.10863	-1.80602
C16orf90	0.181519	-0.181845	0.420207	-0.00916386	-0.647075	1.06033	0	-0.355404	-1.24074	0.179051	-0.365758	-0.0487814	0.764208	0.354527	0.202563	0.509603	-0.699096
C16orf91	-0.370599	-0.42781	-0.103098	0.019208	0.299137	-0.19202	0.0772896	-0.122208	-0.0624876	0	0.858346	-0.0723181	0.165125	0.0251122	0.239966	-0.163694	0.14516
C16orf92	-0.602839	-0.989432	-0.879742	-0.459002	-0.47952	0.0287857	0.560888	0.32309	0.279856	0.427652	0.376115	-0.122015	0.307146	-0.368999	0	-0.381354	1.58041
C16orf93	0.0423155	0.2011	0	0.0429254	-0.059701	0.41326	-0.368491	0.214698	0.0618916	0.294274	-0.465421	0.0382118	-0.480863	-0.846064	-1.10736	-0.341208	-0.492123
C16orf95	-0.245999	-0.0515957	0.0555038	0.309835	0.287332	-0.424037	-0.00662422	-0.723105	-0.320472	0.240425	0.301071	0	0.13482	-0.302206	0.973764	-0.105527	0.579829
C16orf96	5.14042	-0.895011	-0.783816	-0.405494	-0.372319	0.371243	0.630138	0.408673	0.346272	0.428508	1.25802	-0.470713	0.297989	-0.375608	0	-0.407561	-0.482875
C17orf100	-0.030972	0.0591831	-0.263724	0.0372944	0	-2.27194	-0.492249	0.250195	0.00990868	0.206522	-0.43122	0.0141797	-0.410374	-1.71894	0.276409	0.0974088	-0.245664
C17orf101	-0.406783	-0.663335	-0.477797	-0.0221338	-0.285177	0.00488663	0.856451	0	0.00741959	0.700717	0.600192	0.244771	-0.783981	0.305092	-0.123885	-0.0568686	0.335393
C17orf102	-0.542252	0	-0.512059	-0.416319	0.589238	0.140279	0.633294	0.420343	0.314789	0.346894	1.87051	-0.339647	-0.455288	-0.252657	0.113525	-0.267833	-0.538493
C17orf103	-0.741906	-0.636349	0.357344	-0.39321	-0.788918	0.549666	0.785946	-0.174171	0	0.379661	0.387754	-0.0612168	-0.539553	-0.128182	0.0480375	0.525736	0.406785
C17orf104	-0.474716	-0.331503	-0.716328	-0.129579	-0.337987	0.460024	0.672982	0.460802	0.685704	1.13842	0.49288	-0.370264	-0.0478346	0.00420396	0.370814	-0.296997	0.477803
C17orf105	0.140691	-0.775952	0.262074	0.292119	0.290332	-2.10853	-1.55547	-1.78932	-1.20675	-1.79213	-1.76181	0.860024	0.138621	0.283062	0.295076	0	-0.546308
C17orf107	-0.420935	1.47844	0.550669	0.0647249	-1.04179	0.732169	-1.62208	0.274773	-0.17999	-0.176722	0	-0.95455	1.34294	-0.215816	2.75868	0.0122604	-1.83991
C17orf108	0.069726	0.126714	0.163906	0.194511	0.557234	-0.00869751	0.467938	-0.190372	-0.0307741	-0.127275	0	0.224177	-0.919441	0.453647	-0.147801	-0.402542	-0.693562
C17orf109	-0.628409	-0.524808	-0.269421	-0.963546	0.795769	-0.103086	0.0274255	-0.00179934	-0.024163	0.269166	0.629567	1.03385	0.42658	0.0275188	1.31667	-0.0977156	0.920101
C17orf110	-0.664609	-0.0607128	-0.893859	0.898273	2.16804	0	4.47998	0.2958	0.203981	0.186258	0.304528	-0.662421	1.27752	-0.575315	-0.201832	-0.595146	-0.888363
C17orf13	0	2.07521	-0.0227432	0.710624	-0.508002	1.54074	-0.316975	0.742562	-0.524894	-0.666475	-0.527171	-1.40102	1.17884	-1.32815	1.13648	0.691186	0.0121179
C17orf28	-0.118423	0.0498743	0	-0.478087	-0.134189	1.01414	0.843807	0.760432	1.04698	1.44902	0.998698	0.586876	-1.26918	-0.799586	-0.171146	-1.31324	-0.0150299
C17orf39	-0.324767	-0.506265	-0.568538	-0.182535	0.0120177	0.0375774	0.539265	0.158975	0.212808	0.458928	0.576734	-0.438631	-0.0459478	0.193635	0.0901918	0.757705	0.0122109
C17orf42	-0.301368	-0.166611	-0.270434	-0.162736	0.622688	-0.0635462	0.135142	-0.108851	0.0658989	0	0.854735	-0.146993	-0.123707	0.308742	0.0776062	0.107933	0.497963
C17orf46	-0.493778	-0.49303	0	-0.149375	0.467054	-1.53618	0.337661	-0.153865	-0.0680413	-0.786992	0.287781	-0.135481	0.556787	0.43006	0.930872	0.872704	1.02277
C17orf47	-0.184025	-0.567003	-0.454309	-0.0584755	-0.0411696	0.563793	0.96699	0.739178	0.694962	1.02539	0.802764	-0.0578337	-0.200407	0.0277014	0.382483	0	-0.316598
C17orf48	-0.404929	-0.200537	0	-0.367708	0.0254779	0.224026	-0.18477	0.308261	0.0739045	0.145485	0.621327	0.480688	0.295662	-0.279865	-0.239894	-0.332277	-0.197103
C17orf49	0	-0.732163	-0.713363	-0.89281	-0.307959	0.2589	0.519896	0.375566	0.322787	0.127319	1.0633	0.227301	-0.342748	0.0816259	-0.937764	-0.384573	-0.322838
C17orf50	0.133593	0.192818	0	-0.065968	0.297998	-2.46814	-1.69759	-1.26725	-1.27459	-1.66034	-1.42086	0.369787	0.0585437	-0.127666	0.346884	0.401055	0.222809
C17orf51	-0.522498	-0.381373	-0.223203	-0.319761	-0.0438681	-0.413666	-0.230772	0.0664759	-0.201753	0.477522	0.163936	0	0.718441	0.294799	0.221737	0.560034	0.482417
C17orf52	-0.451995	0	0.407155	-0.850972	-0.847517	-0.154397	0.117088	-0.108833	-0.156919	0.289328	-0.0408635	0.71548	0.0730386	0.130213	1.88105	-0.845189	1.04517
C17orf53	-0.416162	-0.119393	-0.226435	0.764098	0.130616	-0.664901	-0.343605	-0.733751	-0.709169	-0.358602	-0.80045	0.215296	0.940074	-0.146111	0.0323756	-0.135787	-0.430832
C17orf56	0.523278	0.45735	0.247414	0	-0.257682	0.469843	-0.33474	0.446092	0.507984	-0.0761576	-0.541906	-0.699389	-0.120022	0.0775022	-0.45532	0.435003	-0.249919
C17orf57	0.412621	0.387693	0.00521993	-0.119837	-0.0911405	0.259475	0.444306	0.722021	0.950444	-0.543981	-0.0898638	-0.404891	0.116495	-0.535662	0.701603	0.337537	-0.677077
C17orf58	0.459698	0.241543	0.234278	0.463275	0.712637	0.0816359	0	-0.192999	-0.351298	-0.187377	1.16972	-0.434094	-0.240448	0.667473	-0.13555	-0.152463	-0.771189
[truncated: 20,070 more rows]

## Sheet: GSE29819
GSE29819
geneNames	GSM739002	GSM739003	GSM739004	GSM739005	GSM739006	GSM739007	GSM739008	GSM739009	GSM739010	GSM739011	GSM739012	GSM739013	GSM739014	GSM739015	GSM739016	GSM739017	GSM739018	GSM739019	GSM739020	GSM739021	GSM739022	GSM739023	GSM739024	GSM739025	GSM739026	GSM739027
A1BG	10.6938	24.0383	18.4237	17.1978	3.66127	35.6601	3.99954	9.45026	44.3967	29.2808	9.29024	8.14643	4.11731	37.2356	15.2506	20.8668	7.10886	28.0439	2.40668	22.2368	18.6036	11.3317	20.1796	5.68459	3.78955	25.9573
A1BG-AS1	4.01074	8.73327	6.83156	14.5549	4.45712	9.16925	5.50497	3.16959	8.81437	6.89993	5.89637	15.5553	6.58573	9.26619	8.32389	13.353	1.74694	8.06733	5.07391	3.82143	6.84848	6.21627	7.68248	11.4107	6.21713	39.4381
A1CF	19.3549	22.7928	23.7378	12.0824	16.3038	4.61309	17.3451	26.8845	24.0426	15.1976	24.1262	16.8661	27.0344	25.021	18.5368	23.6559	37.5328	24.9009	21.8895	38.4794	16.7221	22.18	33.1272	9.69289	24.0734	5.18417
A2M	2073.14	2308.82	2052.91	1760.7	1795.68	1871.59	2196.93	2106.74	1384.66	1636.97	1658.71	1577.27	1862.06	1743.68	1549.87	1474.56	2575.82	2565.5	1998.63	2279.02	2965.85	2577.24	2552.92	2242.45	2860.77	3049.68
A2M-AS1	125.387	178.272	193.643	112.42	183.489	129.092	156.199	114.914	118.888	129.938	222.453	157.305	111.381	137.685	30.7392	39.0446	80.0143	83.4654	158.473	129.048	67.1467	38.7155	53.5951	53.708	63.0034	43.0918
A2ML1	2.83353	7.06479	8.10115	12.0017	8.72768	23.063	17.1684	3.56685	12.6846	12.9546	17.95	13.6087	15.5673	19.1207	5.63417	11.8422	5.98372	2.09083	7.63679	25.7649	4.38848	11.5457	23.6579	17.8436	9.88768	3.62642
A2MP1	9.15929	11.8935	24.5352	11.3694	17.1013	4.96786	7.26135	1.12299	19.473	10.2763	24.2767	17.8614	38.8254	38.0094	9.38531	5.55612	18.53	1.38563	25.3582	4.41579	24.5901	5.62854	27.7151	5.22067	24.0314	8.00398
A4GALT	52.6143	32.5935	25.1798	35.6218	48.6878	11.6093	20.767	26.8983	48.7575	15.6344	27.9684	33.0876	40.5021	10.9866	35.4657	106.2	18.9225	75.9061	27.886	48.4139	44.4213	59.5067	34.3099	9.57372	82.1783	105.382
A4GNT	26.17	35.1201	39.2041	29.2866	33.3552	33.5878	32.6636	29.289	38.0318	18.4688	27.2415	47.9312	25.2689	5.31171	23.2569	31.1888	27.903	6.04771	13.8526	36.173	26.8152	17.811	18.3272	21.8408	32.1959	34.5471
AA06	32.4234	23.3657	22.8449	10.8112	21.7199	31.9599	19.4212	3.37944	35.7132	30.2619	7.78228	28.687	41.7327	9.15892	31.9063	43.7321	31.6539	27.4168	51.7019	54.2716	35.8235	32.0046	29.6896	28.9158	8.39086	39.6222
AAAS	50.5179	77.5596	18.2539	42.6642	26.469	22.7532	44.379	73.6803	18.4385	27.7328	29.2298	9.8734	18.6693	61.7425	11.0778	71.1895	16.9965	76.1473	63.7073	25.811	49.7603	73.5443	16.6895	29.733	41.9761	16.4744
AACS	80.9936	110.143	162.148	158.642	161.786	157.811	116.818	189.003	170.075	170.43	221.813	206.952	188.924	191.246	156.227	192.017	199.341	218.689	128.854	222.124	156.511	159.386	190.399	126.982	254.401	244.549
AACSP1	9.50343	18.9478	5.15306	11.3322	1.67564	3.64308	4.83278	0.818495	13.957	32.3181	3.23203	9.12545	15.2167	17.4703	15.5512	50.4161	1.68599	11.781	18.7633	21.9079	13.4708	5.09891	9.22322	17.8311	5.14045	2.50685
AADAC	7.84386	2.50994	4.58403	14.5947	22.8371	8.2611	8.01713	3.4655	2.89474	21.5995	6.72073	6.02832	4.85768	2.67696	1.94536	3.18422	5.90908	3.55348	4.50163	5.61848	14.5775	3.41017	13.6006	5.24121	4.0832	7.67635
AADACL2	3.62115	1.14385	0.650684	14.0514	0.510084	4.67095	1.92755	0.564176	7.8457	21.6778	0.557983	0.766456	8.112	0.627928	8.82364	10.1131	0.491748	9.32226	1.00207	14.9828	5.68981	21.7533	3.02325	4.9347	8.70635	2.10861
AADACP1	5.13967	6.02915	2.49951	21.7178	1.46527	2.32443	1.08008	1.42235	1.07658	1.56074	1.67692	1.36548	1.03818	0.624267	0.67902	6.6025	2.08954	3.70715	10.6836	7.01635	15.4478	1.68339	4.03123	2.04206	12.7514	1.43766
AADAT	10.451	34.6025	10.5384	26.6612	28.3797	10.0292	21.5943	25.0217	15.3958	25.0016	13.4707	9.92819	27.7887	7.66898	33.9936	1.77881	10.5788	13.2221	21.9522	55.0312	13.2331	12.5458	22.8522	38.8281	11.8143	10.0501
AAED1	240.885	215.617	119.032	185.718	194.198	169.147	321.059	294.002	203.695	169.259	180.747	265.338	386.572	296.508	454.246	407.293	320.18	331.229	379.781	375.39	332.173	421.914	499.566	417.264	515.621	381.749
AAGAB	37.1745	40.3822	39.2627	48.9937	48.6412	40.5112	36.049	45.4865	60.8904	49.7608	32.1642	47.2208	59.3302	46.8549	72.152	63.8375	63.0208	42.0392	33.1993	32.1416	43.5874	55.4369	48.4518	47.6226	43.1672	45.8277
AAK1	170.551	162.318	254.248	180.217	183.073	143.301	252.507	159.541	223.316	194.673	179.268	127.365	241.307	206.192	179.32	153.682	160.709	100.538	211.43	196.607	161.959	142.411	161.955	163.154	141.021	102.288
AAMDC	213.389	172.488	288.941	203.117	370.053	348.563	297.422	186.187	253.745	194.246	303.085	218.15	226.55	179.312	324.847	393.284	255.875	304.812	309.371	299.401	299.115	321.936	388.375	370.693	354.135	363.366
AAMP	142.801	179.619	139.717	147.151	129.399	152.381	106.937	145.032	169.202	200.295	183.41	190.379	133.529	205.771	144.491	169.759	154.308	193.912	146.865	145.129	183.607	228.04	84.3825	195.745	180.841	152.781
AANAT	1.74242	7.18615	2.99989	4.43775	2.50557	5.29461	1.12617	2.02061	2.42402	2.39868	2.19249	20.4295	7.74712	1.57993	2.41016	9.7488	0.693053	3.34887	3.46039	2.50165	2.87639	18.0517	12.4944	1.78548	4.40333	1.58453
AAR2	158.367	138.595	125.028	144.212	142.837	161.237	130.028	162.864	142.318	108.533	139.412	138.629	136.479	121.81	158.877	140.425	157.674	130.846	112.678	134.325	126.102	97.0654	127.775	62.5407	114.118	99.8224
AARS	466.296	460.901	381.443	410.642	440.73	489.186	302.561	500.821	443.013	469.725	289.427	486.093	393.121	486.519	269.543	417.163	371.072	458.086	292.209	410.885	298.713	414.642	405.896	368.437	465.001	490.926
AARS2	43.3156	38.4541	61.352	41.6389	55.1455	37.1318	58.3563	50.7967	70.9539	39.6721	55.0844	45.1649	51.1847	49.4258	33.7197	4.56742	29.3727	59.7508	34.3716	62.3514	57.4786	42.552	41.4557	43.3631	40.3105	66.9413
AASDH	100.976	96.8995	85.3777	69.2674	126.513	83.7155	130.707	83.3297	123.891	74.4769	108.088	80.1721	121.295	80.086	96.9107	59.167	74.6872	97.0307	82.8403	85.6216	113.549	93.7418	87.0718	61.5802	91.7491	89.3723
AASDHPPT	329.61	340.507	277.111	338.466	298.038	331.091	328.702	306.17	268.398	319.875	280.906	289.647	239.912	312.153	217.305	247	243.402	321.356	247.711	292.93	255.346	257.604	322.15	258.874	240.623	223.814
AASS	103.833	72.7779	48.1979	57.7318	81.0256	67.5263	78.5784	55.543	69.0346	51.2632	120.036	106.534	90.3173	65.7964	76.4705	81.9739	110.202	111.422	105.565	104.156	64.0919	50.4238	109.701	91.3595	90.0953	100.739
AATBC	6.43117	21.6398	37.4609	39.3547	6.78021	3.35856	28.7109	31.8553	23.2729	23.6291	23.1721	27.7261	25.5147	3.55464	26.303	6.49534	5.09287	2.61036	14.5866	14.5304	18.1244	25.8352	9.83075	4.02586	15.5964	7.47225
AATF	129.39	181.17	214.365	185.017	153.837	139.798	195.469	225.753	195.46	224.775	182.597	204.732	190.711	223.953	261.326	226.024	216.001	163.185	187.922	185.437	155.191	221.708	173.403	206.404	180.321	241.721
AATK	108.429	58.3367	131.752	79.2445	83.8836	121.406	122.517	101.403	155.158	142.161	127.197	170.625	66.6628	161.189	88.6918	124.524	123.631	71.8643	150.627	51.6809	99.3014	129.629	148.48	103.854	143.85	89.3206
ABAT	271.97	313.015	234.843	226.983	128.15	130.814	336.474	280.95	294.294	327.274	345.181	226.6	282.685	253.606	115.69	71.1462	159.164	205.279	267.625	325.17	96.1172	73.5219	124.106	107.218	307.908	116.959
ABCA1	95.6089	85.5613	111.755	95.4904	46.069	38.9225	91.8152	81.6372	103.071	99.0812	125.35	107.908	119.692	95.0295	76.4262	95.8528	53.1811	54.4301	105.099	124.774	137.039	131.921	91.0506	94.2227	70.8897	75.5504
ABCA11P	67.9961	65.2683	76.7755	66.6325	77.6449	68.1179	54.9465	44.3876	36.3487	51.8139	74.8219	47.1522	45.6257	72.2173	41.8766	36.2863	56.093	84.7594	47.0832	55.3022	39.9146	35.7599	47.985	77.2414	39.6644	69.6722
ABCA12	0.270361	8.18648	0.494746	9.31928	7.69077	6.22215	1.67366	8.38792	2.13576	20.1453	0.418843	10.9638	0.819349	9.28005	2.24555	18.6337	0.978636	21.8216	0.916251	2.10999	8.56397	8.17454	9.92629	14.281	9.59615	16.7548
ABCA13	1.75499	6.01511	5.98778	6.1522	5.40367	4.46219	3.37026	5.01822	7.23401	5.45132	2.5001	10.0766	3.37912	4.79936	7.03751	8.35619	5.31352	8.45635	5.57253	3.68591	2.93639	3.10371	3.50512	8.06826	0.365963	3.67249
ABCA17P	15.208	25.0419	22.7846	7.81375	22.086	24.2811	18.8888	5.65932	5.55934	9.2194	12.083	34.1774	24.4091	28.3926	9.60676	45.1936	4.13327	2.02954	26.9956	2.12455	21.7067	28.8967	29.9257	7.15503	11.0115	28.6606
ABCA2	30.93	39.5718	32.044	34.6232	29.126	28.3335	22.876	45.1593	25.0973	40.5582	23.6682	35.6297	28.2955	61.4925	24.6986	31.2873	19.9781	25.3983	20.9896	35.9047	23.2033	36.1696	20.9474	39.2641	23.7416	39.4823
ABCA3	15.1808	25.3712	10.3063	46.6797	19.8445	62.1526	6.76568	31.5712	7.14475	37.3286	13.3908	47.1262	8.58791	71.001	22.7185	23.8567	12.7346	48.8619	13.8507	15.066	19.9157	40.61	38.4234	44.0071	53.1869	9.66679
ABCA4	5.35497	4.98839	7.7305	2.14986	7.28056	5.56409	4.63291	4.13908	4.24664	6.72374	3.63306	8.42819	3.96957	5.27275	10.291	4.01523	32.2159	13.0506	8.52514	4.34346	3.87946	8.03581	6.64409	24.5719	8.01	13.7932
ABCA5	95.4526	71.608	114.726	87.5964	111.964	91.7334	121.499	71.3452	114.596	102.091	142.516	123.118	92.6174	84.5909	109.328	78.7746	81.0131	85.9276	125.817	85.0851	120.591	113.061	116.039	122.174	72.3079	61.8672
ABCA6	157.109	133.276	71.4496	106.68	203.522	171.906	122.389	144.833	164.587	170.34	132.284	145.698	185.635	157.024	77.7086	63.7788	69.1613	140.651	77.5366	134.088	105.224	130.853	91.7385	102.751	66.365	44.9264
ABCA7	42.027	20.8729	40.6226	4.26873	36.428	31.1977	46.0261	33.0691	31.853	36.7366	18.3195	11.7565	32.298	11.8421	23.9859	32.9857	7.28845	46.4322	45.3836	9.73898	28.1259	59.0534	32.8194	34.7408	29.8855	57.9456
ABCA8	576.884	410.721	394.324	297.954	658.565	545.774	445.179	461.364	543.837	539.624	559.75	465.411	532.389	467.186	295.671	235.44	305.054	453.187	451.439	403.829	484.394	552.629	592.874	707.693	310.696	514.853
ABCA9	63.4556	62.5525	85.2975	53.6792	96.0899	116.011	89.7133	93.1616	75.6871	73.2275	125.991	74.6473	93.6845	88.2766	45.1992	41.4971	40.1267	105.886	40.5925	76.0731	78.3357	66.0304	56.0353	80.4657	59.2918	84.709
ABCB1	29.9079	11.6736	29.5764	15.0549	30.7823	26.6528	33.5102	29.4091	30.6591	22.0841	9.13884	17.4674	42.8675	49.0829	22.0164	58.7921	23.2827	20.5696	33.974	20.2338	25.3327	27.1398	23.0366	11.1244	25.5984	20.1161
ABCB10	204.715	172.672	133.243	191.571	184.281	212.946	191.523	195.459	167.458	206.377	197.494	173.346	151.303	142.273	212.002	235.058	203.777	252.722	195.385	171.995	169.118	159.226	238.138	154.877	241.814	182.008
ABCB11	3.83975	6.46915	2.65303	7.53533	1.9767	5.13981	7.91167	3.40438	3.54828	3.27111	1.97346	3.70891	3.38591	6.04416	11.707	2.58254	2.19665	6.48888	2.69143	3.73645	2.07802	15.572	5.61612	13.1685	4.60821	4.91875
ABCB4	61.0906	61.645	64.529	42.157	50.3497	36.6212	47.8837	32.3943	61.2088	54.7275	53.0757	32.2837	73.8118	59.7302	62.8364	58.0445	65.6862	56.7515	102.869	95.1237	60.4874	49.8643	77.7642	74.332	56.2041	42.4856
ABCB5	2.28895	9.19728	1.40814	11.3701	3.76812	18.1599	4.8063	8.10945	4.56795	4.08627	8.19695	7.47884	12.2516	17.4771	5.07508	10.3057	4.4853	11.3298	9.52639	9.05832	11.4437	6.85496	10.769	18.7009	7.57502	8.12011
ABCB6	19.7884	20.642	31.9806	22.0524	45.4965	26.2825	45.8052	31.643	35.6104	28.6165	32.5406	18.1894	25.3713	26.8915	28.1655	19.1539	27.4219	18.1024	34.5892	32.7802	37.0483	38.6291	48.4375	46.1221	29.5302	35.006
ABCB7	226.796	339.12	311.616	242.458	292.606	343.158	361.668	334.042	346.185	238.226	273.804	321.98	277.033	283.546	346.765	339.704	268.422	311.686	300.217	346.55	202.651	271.194	342.915	414.397	222.836	152.372
ABCB8	22.108	28.8381	31.1712	26.3514	17.732	36.7882	28.299	32.136	18.833	8.43647	22.7912	23.6518	21.7479	34.1473	18.6379	35.2524	14.9932	25.4313	28.8783	28.6035	15.8395	11.4777	22.9293	31.3026	21.909	43.2456
ABCB9	17.374	17.7596	22.0895	14.1434	17.8456	14.8102	12.0534	16.6032	9.77639	20.4555	5.6223	6.34981	21.4282	9.65901	3.92942	28.4982	4.68336	15.0588	21.8459	20.7926	17.8822	19.5544	11.8904	16.0328	5.43762	8.86866
ABCC1	126.183	107.331	200.152	107.077	152.703	135.455	184.55	125.091	153.283	104.14	138.096	136.074	159.194	135.696	129.448	140.159	203.058	164.098	168.172	165.499	127.892	88.966	134.172	158.057	120.797	114.465
ABCC10	81.7006	75.6148	95.6773	68.3147	91.8938	84.0876	72.7613	95.3887	81.6539	81.2938	82.8982	71.5839	76.358	69.3156	75.2165	63.1028	78.4159	64.6128	89.701	113.279	95.0878	98.2738	85.7957	95.9714	80.6487	66.3483
ABCC11	4.05838	2.17031	20.8753	12.9182	6.61451	16.9233	2.95163	11.831	11.1242	3.94882	3.9158	7.72096	8.47783	16.8053	2.05108	12.8539	12.5825	2.40806	2.70897	7.61492	1.4773	26.3788	11.6434	3.32527	4.3347	13.3614
ABCC12	4.89388	1.69517	3.44711	1.83823	5.78828	7.9823	2.45431	2.16532	7.50376	1.92652	2.07728	12.4538	6.7297	11.2244	5.18411	30.4808	11.4719	11.985	9.07746	2.75403	6.06788	3.0251	1.60885	9.59683	0.905928	3.35336
ABCC13	2.94981	6.13235	6.99728	10.8323	11.233	14.6316	8.76188	11.1626	11.2751	7.69397	7.08145	8.79035	7.68042	12.9052	3.80806	6.26783	11.648	8.88376	5.37908	5.93671	11.1952	7.39132	5.64511	14.533	12.7313	11.0331
ABCC2	8.89307	1.60021	6.10622	1.90004	1.77834	1.75634	1.666	2.69491	5.5361	1.56451	1.4724	1.46592	1.32202	3.81295	2.46997	3.64742	17.828	1.67511	10.475	10.7943	15.7856	1.37263	2.32243	1.82052	5.10585	14.1408
ABCC3	6.13218	10.9639	5.35485	10.9707	5.95293	7.94652	6.09884	22.1537	3.93904	13.408	6.95512	4.70804	10.8212	11.1846	10.1402	37.6209	12.8502	9.04466	7.84382	12.7245	5.93635	14.8179	8.3649	26.5749	4.41401	18.6536
ABCC4	24.2431	25.9634	24.8442	24.4695	19.8043	22.1299	17.3132	21.5409	34.2274	28.1129	16.9345	17.7577	43.2212	35.4703	27.5906	39.087	34.1145	40.3226	38.3441	24.1923	27.4527	24.9484	18.7709	30.7433	22.2532	31.5129
ABCC5	134.279	127.972	124.265	95.6393	135.692	144.039	154.504	131.217	142.23	134.447	158.356	143.847	133.824	139.955	339.324	227.293	163.626	147.459	195.133	130.837	313.374	258.438	339.488	249.806	244.49	172.002
ABCC6P1	0.788383	26.9687	14.2962	19.0056	21.7129	26.8776	13.4667	7.90972	12.6737	3.52917	3.25425	9.07886	9.51061	35.3577	2.72686	28.6522	0.945737	3.15479	19.8049	6.29242	18.32	23.2061	12.7094	17.8814	22.0004	5.45043
ABCC8	5.17379	4.51891	3.0537	13.6732	16.0872	3.13798	23.1781	4.4869	27.7704	17.4879	13.4204	21.1827	5.313	5.13479	49.0683	6.90317	4.74827	10.4998	15.3881	42.7897	11.1018	6.54727	4.24683	6.67997	7.43038	6.38377
ABCC9	58.8862	85.7939	72.5322	60.1777	71.9639	70.4859	72.3398	83.8781	46.1855	67.5684	63.4208	64.3102	70.8052	67.6439	65.1816	65.8308	70.2703	121.711	73.7034	82.2791	73.9771	100.009	96.8704	112.233	87.0565	81.4767
ABCD1	49.0268	87.7238	101.404	86.7218	102.525	83.981	54.583	118.145	71.668	31.8325	91.5507	112.057	100.83	101.443	57.2528	31.3001	95.816	70.5671	90.692	65.6872	65.2378	70.0933	71.8297	85.7074	79.4147	98.275
ABCD2	13.2916	17.0781	38.5127	18.46	40.7292	41.4475	40.0557	34.9824	27.2506	29.958	43.7073	29.5193	26.1501	33.6023	25.7572	39.6848	20.9032	44.8783	29.0605	33.9359	37.2419	41.869	16.5098	17.272	6.6702	28.6423
ABCD3	393.839	619.688	572.302	629.961	577.544	687.413	430.344	430.067	533.146	628.961	598.545	685.687	552.106	652.576	703.617	798.749	502.55	539.588	594.046	507.691	708.497	935.941	609.358	608.481	523.234	428.017
ABCD4	54.7399	42.7707	33.9848	33.7885	41.4796	34.4624	43.0407	47.4786	40.2812	45.0879	47.8068	48.8301	43.6798	45.8893	44.2059	71.2789	22.9281	42.9138	51.6762	16.5522	86.931	66.1741	55.2029	55.0807	46.2216	31.3943
ABCE1	293.801	327.115	280.16	342.616	301.778	348.362	353.39	372.174	276.385	339.641	286.5	265.632	286.048	320.874	290.017	349.77	288.765	359.075	237.516	284.662	299.709	407.769	318.688	363.824	292.561	307.838
ABCF1	304.103	310.14	300.265	309.133	267.653	300.552	284.583	263.39	319.805	308.441	253.173	256.09	264.239	309.044	288.02	232.19	284.704	267.998	242.872	254.725	225.079	230.313	305.204	255.991	256.862	222.87
ABCF2	71.5901	89.0276	80.2654	85.6451	55.338	65.7763	59.9426	73.2062	79.0453	82.4733	66.0833	65.3067	74.1518	84.571	93.0484	79.1754	79.0725	57.5681	62.5106	54.4172	69.7463	102.659	71.389	102.819	51.9127	66.4641
ABCF3	129.001	145.954	152.684	151.049	155.401	161.629	140.641	137.221	128.834	147.833	98.998	148.36	156.721	129.445	160.211	168.726	163.01	125.628	135.921	153.513	106.534	105.388	107.859	88.6033	93.7347	16.8339
ABCG1	69.7804	70.2514	71.9982	62.8212	31.7845	45.1834	51.0989	44.0161	35.5932	37.1653	77.9803	50.6391	59.9369	76.4113	71.4134	76.4252	66.352	57.9573	109.355	102.925	61.1645	60.3288	65.1569	84.1784	82.6023	64.466
ABCG2	88.3761	104.838	66.5371	81.7533	39.4668	77.0561	58.091	85.7584	74.9639	61.228	86.1488	64.9469	36.2668	43.2399	29.3657	13.491	55.0233	38.3224	13.1828	37.128	26.847	53.6952	37.0927	38.3755	34.2654	1.3062
ABCG4	13.8208	47.6579	12.3373	55.7556	32.6785	65.0239	26.3871	68.0393	11.2419	67.6094	7.54156	66.7375	9.12026	40.6216	14.9697	57.1505	13.9373	43.4726	40.4611	62.396	15.3777	52.295	42.3544	61.8336	38.0764	16.6489
ABCG5	0.884448	1.72063	1.35527	1.26177	1.03834	2.0276	1.27065	1.52119	10.6328	1.09175	1.59877	2.86137	3.43748	3.17628	12.4035	6.22523	2.49787	1.20787	1.41082	13.9029	4.54833	3.83725	0.741781	21.3955	1.60672	5.5242
ABCG8	18.1526	21.1944	13.165	2.59354	4.10475	38.4403	13.4068	21.0612	24.7872	8.88743	21.9485	22.6768	3.59174	20.7209	2.9158	7.62995	5.9187	15.4203	7.26515	4.90932	1.76758	5.95272	4.66089	6.11968	15.5566	7.26198
ABHD1	33.8246	29.8572	33.2285	21.5534	33.4996	18.8925	44.5113	22.6881	19.7442	40.7939	38.6638	28.4296	35.987	43.6681	21.0431	24.0565	28.661	28.3044	30.3978	40.4229	29.0272	3.64347	49.5307	30.7072	41.7455	41.079
ABHD10	245.204	349.48	355.726	275.565	379.945	390.605	348.311	349.671	291.034	360.642	365.224	335.376	337.388	329.647	277.866	235.021	295.218	406.085	389.153	430.704	286.86	340.18	281.561	293.169	308.889	289.8
ABHD11	71.7852	87.1103	80.2706	75.1776	81.8796	62.8859	60.2028	77.7267	48.6019	85.2763	71.8754	82.9595	68.516	61.5131	75.124	54.8798	49.027	60.2147	49.4415	36.0228	28.3895	59.5712	38.477	46.9712	40.863	39.6892
ABHD12	71.301	133.597	106.002	164.562	76.286	104.023	77.1715	133.848	103.953	150.878	90.0371	160.921	109.14	158.025	81.2309	58.3707	138.794	113.35	95.0188	124.729	101.653	91.3179	88.4849	105.084	100.68	77.836
ABHD13	42.2019	28.2898	32.7467	35.9444	32.7295	42.6365	30.5914	25.01	22.6599	31.9209	38.2861	30.0798	26.9897	30.3267	28.7072	38.2957	21.9228	14.6248	35.5189	46.2361	27.2173	37.4503	32.5646	54.5748	34.699	31.3541
ABHD14A	222.524	231.19	272.318	219.151	219.983	276.072	200.852	219.033	217.452	268.686	276.021	275.702	177.645	262.338	198.154	148.679	264.681	252.262	306.106	303.036	221.564	193.162	207.092	220.2	288.853	257.716
ABHD14A-ACY1	100.825	133.568	121.329	196.54	178.712	192.548	93.0559	112.965	113.664	164.837	83.484	205.13	141.635	175.231	189.037	221.137	143.801	117.711	132.365	229.557	130.944	150.363	118.731	168.146	130.468	187.998
ABHD14B	118.045	110.201	61.6874	82.2907	121.998	83.495	59.3588	140.832	70.5583	137.2	112.01	132.478	76.006	124.637	61.8466	73.1394	63.1251	46.4144	90.9868	66.3056	47.5997	66.7836	88.7879	61.1103	41.9718	65.3416
ABHD15	39.7476	43.3821	32.8371	26.7213	27.744	31.5928	16.8801	49.9877	29.2688	27.0629	18.6745	51.6254	47.7539	45.9351	31.9481	20.7798	43.7974	104.109	36.8828	46.0825	35.7127	17.6141	37.0239	71.5857	38.0406	20.3186
ABHD16A	54.3595	73.8449	72.9246	112.482	60.757	83.7961	66.3194	79.6511	60.3026	99.2021	60.0441	99.006	70.6231	83.6803	64.2569	109.601	68.2255	65.8802	64.736	92.5447	72.0055	83.5836	48.1205	109.46	65.7087	91.5524
ABHD16B	1.10451	2.65979	2.43757	3.48688	1.99388	2.69122	1.4789	1.87861	2.07479	1.85583	1.49778	2.07158	2.1248	2.54879	2.91553	2.20145	1.46113	2.30024	1.84292	1.66364	1.58017	2.18015	1.86423	2.40179	2.36002	4.16637
ABHD17A	463.317	590.231	533.267	558.116	416.262	515.432	453.348	618.878	458.281	539.424	424.476	526.084	457.472	601.23	436.012	433.909	498.379	448.071	482.505	414.536	435.467	378.279	425.117	265.483	478.485	503.924
ABHD17B	72.1189	88.2786	96.0264	80.5056	90.8841	84.6458	72.6092	68.9921	84.3963	85.4165	96.4411	114.784	65.2199	91.9215	90.9645	116.725	86.2045	97.3245	92.4226	79.7142	102.664	106.477	122.335	100.691	76.5802	97.0867
ABHD17C	20.4079	57.1794	48.8681	58.6646	54.0093	41.462	70.5899	49.9512	46.278	47.9232	41.1214	50.588	61.3346	67.5657	31.8636	6.12678	59.3367	17.4397	40.8154	47.8147	42.0292	4.16638	40.4959	33.0494	39.7057	4.50165
ABHD18	152.845	217.395	134.282	133.143	96.6931	210.054	189.67	200.589	141.478	221.2	191.356	194.703	67.8517	88.3927	93.0346	85.9647	140.768	156.854	147.228	153.365	167.756	139.593	122.545	114.565	142.753	140.982
ABHD2	270.397	273.206	224.615	335.94	195.489	281.14	264.699	223.299	306.858	282.977	237.036	208.531	279.517	284.239	286.929	307.661	239.812	184.956	144.495	139.975	202.552	230.299	266.918	249.558	192.208	240.35
ABHD3	58.5542	30.9853	29.7805	55.8395	48.1221	25.9088	44.5865	48.3174	51.6281	46.3566	68.6191	78.2429	39.2632	56.9733	34.2835	49.7072	54.0692	82.0524	47.8066	79.296	124.085	97.6895	60.3105	87.0313	24.6454	59.2682
ABHD4	76.1923	115.364	115.471	123.228	94.1101	95.3501	98.5115	104.111	94.1903	119.981	82.8316	96.9771	93.359	128.529	78.6544	95.9348	67.5759	48.9813	98.7226	71.2551	101.068	91.3297	108.227	94.1804	92.931	71.977
ABHD5	91.5739	87.8382	115.049	124.11	104.104	100.313	118.49	95.4079	105.019	96.7716	116.841	103.029	99.5373	114.833	156.276	130.703	185.629	99.9814	125.716	100.032	112.288	127.784	138.83	135.08	147.802	136.708
ABHD6	28.8026	23.1389	33.1564	26.8868	36.2928	26.2499	29.8365	31.1273	39.1778	46.0503	29.9448	23.1091	33.9967	44.888	30.7629	43.7854	30.517	41.4444	41.8631	41.617	43.3742	49.0204	32.1375	51.9771	34.4607	44.8697
ABHD8	17.0485	34.4199	5.23467	22.1861	17.2721	6.4411	7.58915	35.7047	34.5372	3.20117	13.8365	40.6145	7.15371	7.78286	12.9647	6.97259	27.6979	2.85695	15.0936	14.4119	15.3665	9.70894	6.89494	3.709	2.41153	4.28478
ABI1	127.782	153.058	124.065	144.109	110.698	133.855	122.227	144.297	122.065	122.501	115.166	123.975	102.677	115.002	135.227	106.326	109.354	132.97	118.379	111.278	120.425	141.026	109.4	112.801	110.04	129.44
ABI2	213.088	206.151	205.034	233.9	189.406	160.968	230.763	171.208	257.821	232.059	211.474	197.743	186.679	175.476	199.329	163.29	169.555	138.358	192.471	152.121	172.749	133.682	134.175	114.58	175.385	116.659
ABI3	77.6748	138.82	139.752	153.752	105.425	158.4	99.7524	135.255	174.667	118.651	85.243	124.547	129.207	79.7116	148.78	141.374	138.468	137.623	92.4209	114.274	102.721	161.625	138.201	134.457	112.286	131.997
ABI3BP	474.836	297.212	138.566	239.765	265.23	295.556	180.178	288.968	264.115	424.645	221.383	463.032	387.641	402.031	147.162	132.449	174.326	116.094	105.424	124.442	220.032	394.096	125.376	169.13	155.087	304.775
ABL1	158.374	228.293	160.706	208.863	176.008	188.025	186.906	264.4	176.009	243.36	168.157	195.894	213.253	220.499	186.945	168.355	152.623	153.997	160.271	152.611	249.62	196.793	196.71	234.414	277.754	304.289
ABL2	34.7865	34.1181	44.8421	58.8609	32.068	48.0204	45.6317	72.5698	37.9378	69.1736	53.0226	56.5877	41.2347	59.134	61.924	87.8887	49.2804	78.1269	41.4648	60.9363	53.3681	72.3535	59.5941	76.3424	46.784	69.5519
ABLIM1	1855.48	2377.54	2920.55	2121.6	2847.54	2851.84	2739.57	2028	2443.23	2468.88	2671.77	2945.4	3169.65	3115.35	2364.53	2193.83	2044.89	2015.1	2544.53	1997.86	2292.57	2149.39	2170.46	2448.96	2755.46	2294.62
ABLIM2	18.4628	35.6619	26.6996	34.0705	25.1829	33.7729	19.1785	32.4214	22.5453	30.5891	20.3349	31.4903	36.7273	24.0501	27.994	60.2707	18.1504	37.0541	26.2536	30.5414	26.2217	49.1628	27.0687	37.8676	26.7825	25.8886
ABLIM3	351.366	394.829	495.58	441.632	508.885	524.837	449.314	387.711	413.412	503.286	587.887	555.464	389.488	371.841	307.954	278.197	273.641	454.121	390.592	388.08	339.819	366.88	220.752	505.715	373.18	350.886
ABO	8.05147	12.2494	28.3636	25.1836	15.9008	49.2275	17.727	35.7065	22.4248	35.5148	21.5981	53.7819	17.8046	44.8708	18.0441	40.9	27.8513	36.413	15.2903	34.5232	14.9733	32.7925	21.8508	44.3013	23.0997	38.8413
ABR	214.628	204.327	131.955	159.631	140.056	163.866	181.16	171.686	164.61	184.737	227.298	242.799	195.937	194.252	70.9195	96.1504	159.175	165.505	184.233	246.554	159.338	124.178	114.012	184.847	198.555	178.748
ABRA	203.66	470.203	132.758	293.7	234.741	413.864	430.322	511.235	396.86	265.982	237.35	263.378	234.935	258.725	1827.24	1697.67	536.274	346.818	361.449	427.327	1380.88	1487.07	1002.49	1130.19	1126.24	2236.74
ABRACL	70.9465	73.3438	65.3166	107.403	88.843	78.243	100.938	122.701	51.6909	52.2222	58.207	70.0526	81.5628	74.3622	109.276	126.633	95.7348	108.076	72.1918	73.06	154.39	140.068	132.642	93.4703	134.411	126.069
ABT1	82.5016	78.013	59.586	45.6344	84.7847	56.1536	65.8884	47.2243	84.7069	62.9503	74.6563	4.49803	101.529	94.2402	84.3874	61.6971	66.9753	103.183	98.3192	139.812	62.8888	86.8992	74.686	51.4291	126.341	142.252
ABTB1	39.8963	27.0225	52.3035	31.0096	36.8527	40.7783	41.144	32.8849	39.6358	34.9972	32.516	33.1497	50.6172	32.6995	26.5351	32.5076	19.495	33.7171	30.3888	51.9185	33.6471	38.2534	37.8798	38.8519	35.8041	56.3737
ABTB2	46.6931	110.912	66.8561	92.9121	113.677	101.168	55.7224	105.845	72.4934	133.999	98.9807	77.0154	83.6157	81.177	75.803	69.5793	67.1192	39.759	94.9219	67.9138	54.6787	64.9706	62.7579	44.4366	68.6056	35.4061
ACAA1	348.373	399.637	534.314	460.475	494.605	520.191	467.674	403.333	419.439	370.978	494.968	507.939	534.21	580.375	425.101	446.457	387.617	415.992	487.647	412.527	376.12	452.164	364.236	399.221	532.896	375.44
ACAA2	353.013	306.983	654.404	433.816	534.292	431.302	464.737	367.973	472.835	316.999	503.034	361.6	515.157	465.871	753.399	608.671	559.77	582.758	569.525	453.047	501.486	499.778	696.419	720.806	435.64	519.912
ACACA	65.1959	74.3123	98.9698	67.9683	65.0318	19.9345	81.7377	83.9304	75.5481	72.9382	94.9595	68.665	101.803	58.3195	88.4956	67.0159	74.8847	63.2256	55.0309	49.3326	81.5886	40.8313	48.6369	74.8805	106.276	91.8131
ACACB	239.258	176.913	255.217	144.511	241.441	236.576	232.228	155.091	219.819	171.594	258.487	177.19	217.193	242.025	231.089	150.316	228.607	312.702	302.978	252.569	136.191	149.581	310.248	292.271	234.073	133.2
ACAD10	41.3225	55.3646	48.9985	40.6158	47.7418	70.3438	43.0833	50.3079	33.9876	51.7607	49.7018	51.1289	54.0215	60.5735	55.1483	25.3497	36.8628	45.7108	40.7248	22.2271	36.3759	41.7379	39.2724	34.6289	40.2431	43.9194
ACAD8	242.735	385.544	327.589	374.621	353.219	446.339	393.863	413.308	271.544	336.237	298.452	322.522	291.331	375.049	270.879	246.272	286.407	282.073	250.146	287.089	148.678	184.356	194.656	208.707	230.263	156.914
ACAD9	98.1946	112.377	88.1244	102.434	119.466	130.834	95.9299	120.742	93.0257	116.942	130.612	138.346	83.981	116.617	129.995	105.734	121.411	118.806	107.19	91.9772	76.952	74.7791	122.101	132.203	90.1795	116.593
ACADL	22.6538	20.265	24.009	37.0684	8.45142	7.52085	11.7007	18.3822	31.7238	39.4722	11.8903	31.2563	11.7642	19.027	25.8862	17.363	18.2231	8.68841	10.2004	16.3204	13.6684	20.0508	26.082	39.947	18.6422	18.5391
ACADM	2091.47	3367.05	3657.92	4200.61	4319.26	5362.27	3148.47	3579.17	3478.9	4461.01	3680.24	4104.2	2847.55	4380.88	4180.55	2915.73	2642.34	2479.31	3242.27	3047.41	2295.22	2879.21	3557.65	3414.64	3369.79	2914.29
ACADS	93.12	150.677	119.192	176.28	179.007	164.295	182.429	186.695	162.324	151.783	157.865	176.606	144.064	222.127	183.491	178.503	117.373	162.976	167.976	278.552	148.318	235.324	193.211	226.173	158.22	183.956
ACADSB	281.986	335.312	465.068	371.803	419.601	370.372	360.34	247.695	463.798	442.254	530.313	486.22	306.202	327.915	396.037	334.348	333.844	391.072	345.712	358.085	403.548	349.448	309.029	251.485	429.204	255.759
ACADVL	1965.98	2462.67	3073.7	2226.32	3425.83	3285.82	2690.37	2337.09	1992.84	2030.92	2313.51	1739.91	2510.93	2855.6	2665.44	2237.3	2106.38	2701.36	3027.42	2392.03	2686.81	3026.67	3049.86	3486.97	3105.36	2604.23
ACAN	19.1524	52.7212	28.2841	26.3186	30.8926	37.8892	26.9701	29.561	39.0835	42.8406	30.1174	48.277	31.2016	58.6284	42.8834	33.5272	43.9623	33.1445	22.758	25.7055	22.5223	18.656	36.9559	21.04	30.6774	31.4499
ACAP1	25.9199	13.245	22.8451	18.7488	14.3681	35.905	25.7014	12.6934	13.5239	25.4637	16.2009	19.0406	15.5367	22.5938	21.2667	43.9944	38.9094	26.7766	13.4498	18.0626	25.8309	22.7531	23.4689	11.276	16.6007	29.2809
ACAP2	106.705	87.7007	75.6588	108.346	95.0045	76.6125	104.284	106.606	107.21	91.0356	81.3919	89.4409	83.5419	78.7735	69.1988	85.9696	94.2087	65.628	79.0067	82.4289	81.9589	96.0497	96.15	94.9355	79.2272	75.6091
ACAP3	41.7281	45.8769	44.0901	50.4067	41.0794	81.8178	29.0744	73.6502	42.1675	37.2	36.3519	24.7828	37.035	77.1932	36.1424	7.94006	54.4026	23.7606	61.6264	49.4194	55.6415	39.8005	30.719	30.6985	55.4862	33.8178
ACAT1	1191.05	1508.95	1698.98	1190.17	1882.74	1764.71	1931.13	1644.06	1403.04	1307.95	1756.21	1461.91	1532.57	1535.16	1627.87	1559.31	1383.77	1749.33	1791.93	1839.88	1388.36	1525.42	1591.73	1550.98	1697.59	1790.71
ACAT2	68.0516	71.9622	64.7791	74.5587	74.4512	70.8194	77.4102	55.631	74.2081	75.6177	68.0079	68.284	60.063	62.5853	26.8567	30.5765	67.0344	99.1196	72.2849	69.2585	90.4751	55.3097	62.1569	47.1237	136.432	70.4203
ACBD3	393.596	339.613	327.034	325.437	300.702	271.219	320.938	328.651	348.29	298.859	296.443	322.884	344.399	264.132	363.182	377.713	278.673	280.207	289.335	318.789	238.565	276.641	240.439	291.735	388.585	377.911
ACBD4	61.8061	38.0934	81.0507	62.1762	53.7385	10.2968	27.9105	72.4248	75.6281	41.233	68.5847	68.8425	48.3282	48.2358	10.7499	30.9663	51.1301	32.7707	30.4761	83.5117	62.514	45.5753	68.7438	31.9686	57.171	73.6156
ACBD5	695.913	684.083	785.943	595.888	796.582	667.165	751.379	626.646	799.454	569.828	823.111	748.293	776.884	809.651	581.192	532.756	752.867	785.979	893.869	647.539	701.685	588.296	912.532	671.48	873.13	457.587
ACBD6	117.673	126.544	101.122	154.504	114.106	141.639	141.385	125.349	112.985	125.15	123.864	141.985	105.387	120.137	103.897	97.017	161.651	142.514	125.509	86.7192	75.8758	60.999	44.5293	84.5316	145.16	112.688
ACCS	45.3134	51.2887	3.57371	23.5608	36.3999	34.6872	29.8955	6.81324	6.92026	9.72451	18.772	18.9821	8.91637	18.9644	2.96439	12.2712	5.16519	63.395	6.90876	35.3829	7.67157	12.0718	6.49488	10.7398	33.4012	12.9968
ACD	69.478	68.4288	52.7307	65.4825	36.423	67.4232	46.5698	55.9326	60.2198	34.2964	69.6366	53.8167	41.0752	29.2981	35.352	54.6817	43.7012	48.0983	43.3226	66.6194	74.9243	52.1959	33.6247	23.7036	59.4765	66.0001
ACE	39.1049	49.8198	48.9102	23.0354	30.9278	19.9962	29.3719	33.9181	26.3478	31.5018	28.2614	40.3466	13.2088	19.129	16.8765	18.1028	46.0875	19.5352	16.109	64.6031	27.0256	32.0206	10.5971	20.9756	41.1294	12.8169
ACE2	267.743	325.359	188.457	541.428	88.6657	93.8379	84.2277	138.276	229.856	209.289	106.887	135.872	238.459	130.354	107.441	91.8675	217.706	98.4668	85.1198	82.6194	90.0388	86.7673	73.4339	97.3951	85.9068	67.2852
ACER1	1.88081	4.7167	4.49044	4.42014	4.05995	5.34728	4.95877	3.93639	4.07063	2.24078	4.61282	5.82566	2.07165	6.96146	3.40303	4.08727	10.8843	3.55624	1.90796	2.03138	2.93416	2.64518	4.06034	4.99287	1.22358	8.71532
ACER2	42.5748	34.7374	47.7974	46.2567	31.2889	17.5981	47.051	55.2933	25.1266	26.5732	31.0729	16.2598	49.5853	47.642	33.534	46.7298	28.2319	26.0814	7.70057	39.2001	35.0725	49.6954	46.5603	44.8243	27.6695	20.4466
ACER3	65.5608	47.9372	67.2704	60.4715	63.7819	59.5472	65.6223	51.1632	63.3802	52.7062	61.5772	53.2829	48.9732	56.6101	75.2533	77.2996	91.5567	62.1337	74.3327	67.7242	103.511	85.1557	71.1784	69.1124	77.1128	71.6374
ACHE	12.6035	23.992	16.4809	15.5221	6.43565	16.4302	14.2768	29.5855	18.2764	14.8352	12.0311	19.8921	5.87388	35.3243	18.1875	9.81666	10.2637	29.9977	8.60385	18.7535	18.1996	22.8326	14.098	13.1011	9.34001	17.6318
ACIN1	111.711	140.172	142.269	144.657	135.068	149.718	128.941	154.966	99.8605	124.287	103.871	144.169	111.114	137.298	141.035	111.384	120.248	118.891	142.009	114.927	88.8405	123.084	74.939	170.465	116.251	104.276
ACKR1	268.693	96.7437	57.3404	101.87	128.421	116.981	199.798	239.723	97.5042	80.1066	34.0715	61.5524	131.312	136.826	199.814	210.615	145.271	224.216	78.9287	97.5038	347.656	182.694	167.306	228.716	90.1638	156.184
ACKR2	12.7108	19.2313	21.357	28.6572	17.1568	22.0596	15.2497	29.5263	12.9564	23.2078	21.7717	32.429	21.5999	20.3616	23.4049	18.9539	17.1683	13.3027	16.7877	18.1467	17.6802	15.7705	24.8655	15.271	8.9485	10.4207
ACKR3	120.847	136.212	78.2979	101.657	110.264	108.455	83.3373	147.397	125.953	125.353	77.8657	92.9617	129.555	155.643	137.468	160.945	43.307	72.5476	109.078	190.805	199.734	204.326	121.199	119.391	222.261	344.491
ACKR4	9.55294	25.8929	23.0853	26.2972	44.2522	21.6543	26.4224	29.0851	16.1156	38.7157	28.3079	29.3636	29.9839	36.778	25.2674	26.7708	24.6055	33.3381	60.7464	118.087	23.0477	53.2025	5.68828	36.2594	42.6484	70.6729
ACLY	183.242	161.488	155.901	149.948	136.756	141.741	152.499	179.826	129.439	162.11	153.122	127.096	168.813	158.962	182.542	191.565	231.865	198.247	131.824	159.544	159.187	242.068	171.565	191.206	184.235	210.168
ACMSD	10.2498	2.52235	14.3764	3.6738	16.883	0.793052	3.4462	0.744735	5.68427	12.5983	12.9128	7.6542	9.62854	3.6125	3.17777	4.10902	9.34538	13.7335	8.55546	3.2248	8.96611	2.43438	8.91269	5.05679	12.9568	23.7768
ACO1	220.324	220.609	266.773	177.337	257.664	232.607	295.841	221.245	220.91	225.362	242.366	241.184	257.539	230.396	226.805	181.386	241.961	204.397	235.003	229.994	253.382	231.351	167.712	204.669	308.559	231.348
ACO2	1370.37	2144.94	2203.07	1895.46	2286.1	2861.03	2066.63	1950.53	1702.08	2159.38	1830.68	2176.51	2038.55	2387.87	1415.44	1637.61	1196.17	2123.79	2523.93	2468.76	1637.18	1815.54	2225.78	1985.24	1835.66	2171.29
ACOD1	9.81772	8.80996	13.3466	38.2042	10.8587	7.04382	12.061	17.1094	14.3665	22.0754	17.5238	15.8396	25.0118	16.7165	20.9416	19.2144	20.8995	3.77135	3.28041	16.8066	18.0457	4.95179	20.3216	53.1751	25.507	23.733
ACOT1	383.865	548.579	646.012	595.614	734.495	663.392	581.889	553.113	490.162	528.281	651.09	673.928	550.756	575.231	810.031	920.657	477.597	719.058	661.21	674.096	508.795	620.169	567.625	726.521	576.305	632.696
ACOT11	51.0477	65.0253	57.4117	77.4758	51.7841	74.3292	58.4047	73.1739	42.9543	65.9004	49.5803	32.7907	58.0551	62.5887	43.8916	33.794	40.7717	46.4132	59.5818	66.6694	31.7392	23.9859	54.7288	47.5946	51.3793	21.9527
ACOT12	4.98105	5.71832	4.48674	11.6658	10.395	24.8191	9.23197	0.813853	7.96161	21.7009	1.61312	6.34175	6.26784	13.55	4.11862	4.68712	1.91752	3.68522	17.3605	6.89744	2.08803	26.9759	4.73103	2.36904	5.29934	14.8398
ACOT13	515.051	554.544	1031.22	692.78	899.386	800.833	702.142	628.808	836.836	717.905	851.235	779.264	913.403	926.066	951.869	750.58	806.579	745.167	1147.02	755.898	810.423	738.976	1008.21	729.523	951.633	767.47
ACOT4	25.0499	36.8959	14.0559	40.7417	36.1577	27.9267	37.1453	42.9734	49.9066	34.217	49.5111	42.9285	18.7108	14.177	11.2686	44.0941	28.1529	1.69609	21.6232	39.1504	23.088	3.69757	32.1665	46.0839	20.3301	13.7187
ACOT6	2.49906	5.31297	2.89355	4.50457	4.64956	2.45048	1.39106	2.38648	1.57529	2.78809	2.22623	3.51722	8.71296	2.77845	19.1478	8.54741	1.90151	3.68721	2.33784	3.28197	2.24443	17.4148	1.79388	17.6614	9.07234	6.16968
ACOT7	44.403	66.6763	48.903	70.3479	43.8138	75.9754	54.7062	65.3892	45.6281	77.4527	34.7992	45.6914	53.2817	66.7091	38.7622	84.5139	69.0378	54.8759	52.22	68.426	56.1691	62.0483	61.3053	47.47	39.7356	52.8771
ACOT8	53.7387	71.37	91.9031	58.8948	68.9662	79.1527	66.9233	65.8398	69.6904	84.3141	68.2814	69.785	58.8815	70.9918	96.8118	76.5297	67.4144	65.2224	72.9801	80.0092	76.2783	73.4622	62.9695	64.9566	52.7843	66.2799
ACOT9	470.675	533.661	400.376	506.356	460.16	496.08	432.564	400.168	411.042	456.929	423.589	462.825	373.141	514.987	541.57	486.267	524.047	396.79	448.985	375.074	517.864	417.046	394.152	356.84	527.315	463.219
ACOX1	158.334	127.308	120.112	132.508	154.255	135.933	219.693	126.286	148.796	111.807	161.284	149.864	178.5	134.818	156.041	126.123	117.115	157.689	157.375	141.48	116.643	135.707	154.661	114.196	150.922	107.041
ACOX2	236.388	273.758	356.782	264.167	329.934	308.838	263.29	240.854	264.379	313.54	272.837	281.254	270.04	230.958	241.932	164.742	232.757	203.856	354.152	343.032	218.925	225.601	211.362	179.524	206.479	155.178
ACOX3	47.0921	69.2693	46.6104	65.0983	46.1789	59.411	58.074	68.2274	20.8493	33.2339	48.5684	84.9491	49.9393	78.9122	55.1359	54.9045	55.5852	40.9113	50.7595	19.4689	49.4834	29.3012	56.1216	41.835	58.5994	61.6579
ACOXL	6.84465	5.18476	12.8261	27.6279	12.5816	9.75276	10.0012	21.5604	14.113	27.7118	19.449	28.7714	7.33142	9.11188	21.6985	8.65839	13.7336	11.4954	13.1924	4.99772	4.72795	14.4395	9.35477	30.2883	6.65171	4.3323
ACP1	248.555	240.132	305.849	328.247	254.634	219.175	269.016	253.687	310.301	291.685	303.712	282.675	256.231	251.681	312.52	352.671	295.094	293.181	311.711	293.988	279.004	266.01	277.579	269.101	258.481	277.454
ACP2	101.731	130.665	176.339	161.317	130.087	202.289	152.155	204.624	184.806	115.495	107.367	148.967	126.666	111.626	199.947	166.336	165.268	111.131	117.968	123.466	175.884	157.109	175.637	109.955	187.378	187.192
ACP5	5.98572	24.9732	18.8891	28.77	18.9315	6.46513	18.1677	46.5398	24.5541	46.4873	9.02989	46.1995	4.71011	43.7974	19.0942	6.09553	46.44	51.6303	28.9896	74.1033	59.622	44.1746	17.9268	33.7185	36.5308	47.895
ACP6	62.9923	65.4036	90.6854	51.3922	71.951	45.9248	86.2871	73.7852	104.536	109.38	91.9589	71.5273	58.5877	47.9538	60.0068	37.5164	106.612	92.1778	92.6543	85.0624	51.0868	42.452	79.484	71.4466	53.9895	39.9518
ACPP	6.66432	4.91674	9.891	5.10597	1.19253	8.80583	6.59258	2.38578	11.2878	5.19023	3.37327	7.95032	3.304	9.04301	0.992772	8.89344	9.43644	3.84284	4.53452	4.26139	6.37223	10.5566	5.53526	8.33838	5.12573	11.7315
ACPT	28.3726	65.5304	29.0821	40.6504	35.821	60.5023	25.6846	78.7502	20.547	69.7759	33.3722	60.9731	43.2593	73.8928	4.75013	58.0825	36.5852	65.8579	29.0679	35.2677	12.2824	36.7383	20.6392	33.3848	30.654	46.005
ACR	13.5	8.64361	54.3999	17.325	15.777	30.6792	33.2319	6.54933	35.5691	66.1189	24.9772	12.6288	41.4486	75.4092	47.9804	43.0947	51.9755	54.3649	19.1987	53.5657	28.2035	47.5129	60.9613	11.9466	36.4089	12.9655
ACRBP	5.68133	11.9488	10.2549	11.2846	2.57978	17.0768	16.7313	5.89406	11.3714	20.6858	4.78647	27.7984	8.14994	18.7503	9.90703	16.9551	15.8796	13.0601	5.98755	12.2094	12.6195	6.70645	17.1068	15.4633	6.29874	15.057
ACRC	25.7788	30.0813	31.2941	42.2561	12.0155	33.4914	12.7781	26.2162	19.4425	26.563	21.7185	39.5435	18.024	39.1195	12.5325	50.3616	36.7189	40.6963	1.45624	5.80289	19.899	23.0842	32.3654	63.4371	21.5649	8.49322
ACRV1	13.6761	11.3514	17.0335	12.1259	17.6783	24.6233	12.3806	22.1024	16.5532	29.5198	14.1548	24.2884	21.2182	20.7386	14.3127	42.6069	24.8802	23.7494	16.2126	27.2885	14.1226	26.9958	16.6339	23.7841	21.1448	18.4962
ACSBG1	3.47391	18.1845	13.9657	7.50373	3.15407	15.8581	7.76074	15.4108	11.002	13.4789	1.49912	23.5368	7.33288	3.71191	11.4582	6.20169	8.96711	20.4081	3.46719	3.75	7.71604	5.21514	8.98126	12.6128	4.67543	3.55463
ACSBG2	5.7575	3.0411	6.49734	2.22843	16.9587	24.9126	4.84751	5.19711	7.2053	5.31055	3.00912	4.37361	9.52523	5.63231	15.9045	19.4867	4.34324	2.2223	4.01124	2.47419	18.4562	17.9013	3.30624	8.05474	3.69049	28.5954
ACSF2	56.3835	84.7258	123.118	110.669	110.566	132.654	70.4327	88.5162	87.9467	113.484	141.447	145.177	137.242	121.917	99.8911	22.5079	38.3291	44.5584	105.45	84.9859	110.515	80.3486	112.504	40.7261	67.167	15.3505
ACSF3	15.2959	22.4255	21.6711	7.48884	14.0193	35.2956	16.1493	16.3036	13.7267	14.2052	26.8709	21.7891	14.8791	36.1675	10.4289	15.6674	16.7188	19.0264	12.7812	16.9888	11.3887	6.2459	19.8904	17.7487	5.58791	6.45122
ACSL1	1288.05	1499.97	2140.04	1574.83	2519.72	2364.85	1761.06	1311.64	1346.32	1413.48	1664.16	1449.57	1779.44	2001.09	1837.04	1734.5	1711.05	1937.86	1585.88	1294.91	1147.71	1470.71	1627.8	1624.52	1446.47	1242.59
ACSL3	610.433	541.17	677.75	515.911	614.334	569.7	792.628	588.974	740.712	562.878	913.402	567.27	582.792	555.187	447.943	367.2	495.158	504.656	606.117	556.819	726.593	635.758	569.09	541.942	607.098	431.315
ACSL4	31.9572	51.8147	41.574	88.0597	39.1951	52.2791	57.0746	58.8141	50.4265	69.9435	51.9138	76.3426	37.4212	59.3703	36.3257	69.5399	50.9598	52.7266	36.3361	51.0932	48.7678	69.0847	40.787	66.5297	47.3356	62.6026
ACSL5	86.8271	89.2848	73.4509	78.2114	82.3785	79.8337	109.886	128.095	73.6162	95.8533	77.0932	63.1867	95.2206	105.496	124.984	121.57	89.81	106.185	64.9903	90.2435	111.733	96.9676	88.6718	98.6286	60.4344	117.773
ACSL6	5.46826	15.0189	12.5781	16.9391	13.8195	13.513	12.476	13.3892	12.632	15.949	8.19527	23.4114	12.4283	12.6679	15.0239	22.9902	15.4568	18.764	15.9301	13.4296	9.40978	8.71538	12.4793	27.2981	15.3296	16.6067
ACSM1	8.73639	10.2483	14.686	2.62178	2.53969	7.69026	5.3436	14.3165	9.61975	18.3134	2.29836	9.23558	5.47378	11.436	3.81788	10.555	10.9273	4.92108	3.52444	12.7515	3.32663	12.2244	5.55855	11.0957	4.27384	17.371
ACSM2A	2.15467	7.38037	8.33452	10.6099	3.76653	1.95025	4.69849	11.1797	1.28197	7.14203	5.90611	9.08469	0.479833	15.7086	1.62574	30.2129	11.1464	11.5142	9.77894	4.6683	8.75483	5.21832	1.80178	9.40731	7.25458	9.4096
ACSM2B	6.47433	2.52893	17.4477	8.51274	11.6958	5.31712	5.80895	5.99201	13.7089	11.1849	6.09832	22.3199	13.8694	16.5775	7.24365	12.05	12.215	7.0448	7.85777	14.0427	1.45957	4.92706	6.86191	10.65	11.1809	5.78598
ACSM3	3.80261	14.3675	10.2532	19.2788	13.9855	8.35551	21.5713	15.008	17.0875	30.0826	22.0369	16.3754	24.0615	13.4157	7.39652	2.99631	7.08276	15.0941	18.5458	34.1797	4.37639	7.44429	2.89255	2.92353	3.71002	16.2939
ACSM5	20.6441	21.3783	16.8426	18.3387	10.5992	13.1994	18.1218	9.89538	68.2074	49.6985	20.3714	26.4718	18.7144	20.6178	4.11415	9.82258	26.1977	31.2988	23.8675	23.0157	43.7767	26.9921	6.69514	17.9851	18.6426	8.76643
ACSS1	79.1548	54.5843	58.4296	47.7674	94.3881	77.1008	79.3947	57.6053	61.4029	35.7971	62.7406	49.0639	57.8676	42.7677	52.6859	38.7801	64.0345	40.9363	82.9992	68.7738	35.8948	31.4433	51.5163	40.2262	58.3535	40.7946
ACSS2	199.817	255.226	326.788	280.635	293.094	256.31	299.486	174.378	237.398	271.752	339.365	256.628	309.081	307.5	332.536	218.126	258.295	183.882	354.72	245.041	305.921	158.804	353.419	347.695	255.652	260.527
ACSS3	97.747	123.759	109.2	112.538	113.107	139.405	129.771	94.1804	119.31	134.857	130.506	117.753	97.3071	143.889	102.009	115.652	119.717	111.283	159.674	147.205	126.726	105.227	117.592	128.994	85.8685	76.5551
ACTA1	12341	14584.3	14577.8	13090.9	14826.9	14502.6	11191.2	12805.2	13523.4	12801.6	14867.4	14349.7	14378.6	16253.4	19125.5	15818.6	17945	11442.7	4716.05	7784.52	14601.7	10659.3	11190.9	9548.27	14853.9	9557.52
ACTA2	1905.68	1675.03	647.968	478.342	1285.75	541.563	409.547	574.438	769.897	370.631	506.948	648.049	546.443	471.347	846.948	674.383	1041.57	868.029	839.072	803.197	740.543	578.268	769.512	529.569	442.505	862.131
ACTA2-AS1	26.5456	18.416	28.2057	26.2452	13.6807	23.7513	15.8743	21.2328	26.2968	39.2107	26.1464	16.2996	21.0945	32.2058	21.3561	45.3241	26.6795	35.8086	32.4643	37.3766	28.0367	51.8769	21.7123	65.7457	35.2529	41.3975
ACTB	4722.3	4606.97	3564.4	3988.25	4054.65	3758.89	3518.44	4992.72	3455.05	3447.52	2702.98	3454.11	4068.17	3967.86	4924.12	5651.92	5041.8	4483.59	4038.52	4403.78	5074.19	4765.24	4224.3	4459.07	4863.2	7763.91
ACTBP9	67.1493	110.369	67.0664	105.65	81.8757	130.807	49.8193	121.001	39.0361	94.8386	64.9892	104.898	63.9388	98.5658	69.5726	85.0043	81.5543	98.5722	59.5904	67.8488	92.1461	72.0213	30.7519	42.8053	64.4578	122.469
ACTC1	12833.8	11899.9	15752.8	10775.9	13868.8	13529.3	11658.5	10797.7	13657.3	11585.1	12970.8	12694	14806.6	13891	16150	14973.4	17517.6	10771.1	13843	13752.8	13031.8	10915.3	13891.9	10688.6	13712.4	15840.6
ACTG1	2994.04	3213.69	1939.89	2793.16	1909.08	2028.26	1675.95	2895.72	2008.3	2616.05	1719.45	2068.7	2363.65	2336.01	2531.54	3486.46	2748.24	2185.42	2034.66	2612.62	3053.42	3158.35	2441.34	3071.98	2620.84	4890
ACTG1P17	7.52228	15.2434	14.6295	8.83888	7.64191	28.6014	13.3024	12.541	15.7081	16.2997	17.8009	7.32004	18.2304	10.811	7.29574	9.72376	13.867	26.4937	12.4702	18.6308	10.2867	18.7068	5.80208	20.2924	11.788	25.565
ACTG1P4	180.974	119.356	125.742	77.7005	155.451	119.061	116.445	96.9324	173.823	103.765	141.497	121.032	131.914	98.9158	60.765	74.2836	69.7317	113.963	122.583	102.719	90.8158	79.8244	82.1656	79.7141	58.8024	49.5502
ACTG2	74.9004	58.117	90.7091	46.8449	228.864	133.24	73.6792	79.8705	155.326	51.9527	107.463	104.107	117.774	75.8414	142.995	114.407	54.2178	110.047	77.9625	88.4719	131.994	99.8729	138.711	69.0699	136.438	133.208
ACTL10	25.3328	37.1587	34.9699	4.78799	11.9754	40.2531	21.4739	9.90685	20.8761	54.384	16.5282	15.2143	17.8716	39.1871	19.9502	78.5759	1.37471	71.1368	8.71662	3.43689	23.341	52.1493	19.1331	45.6465	36.4129	24.7848
ACTL6A	171.962	196.261	178.839	214.904	197.972	205.419	181.455	227.112	214.544	188.209	200.268	192.818	170.383	174.78	201.877	220.199	197.032	226.481	167.608	226.808	224.547	226.423	253.684	204.645	257.831	281.043
ACTL6B	10.4975	3.82759	2.31065	3.70821	5.68339	2.74412	2.25057	11.551	2.7927	12.4277	2.96073	3.68341	5.00996	8.40825	1.85261	14.1255	2.48052	3.3851	2.32328	1.96946	11.0993	3.10129	6.5082	2.42667	2.72673	4.04634
ACTL7A	6.55816	4.71523	12.5123	12.2446	17.7026	33.2337	4.99274	2.91956	11.1382	34.9057	36.0285	41.9288	25.8437	4.68226	18.3471	18.9219	4.23042	12.3886	6.77657	7.13767	5.54267	7.13561	49.9307	7.21243	7.09058	24.4184
ACTL7B	3.36343	11.2228	8.79327	3.51461	8.70683	2.57258	4.06257	25.8024	6.08903	9.622	5.6672	3.53734	12.0788	6.61463	2.92503	4.36105	6.77393	8.93326	6.44775	2.37363	6.21694	28.3723	6.90088	9.58959	7.72131	7.85289
ACTL8	2.20662	20.2295	4.30793	4.81666	7.20627	6.2494	5.11201	4.50702	2.73062	5.32233	8.01283	6.40921	4.58974	6.86723	4.40748	9.00784	3.31796	9.3674	6.27304	4.35963	7.15837	26.5638	8.25175	3.886	7.23665	13.5459
ACTL9	16.8656	11.28	8.12098	18.3467	29.9478	11.7899	20.6137	1.57986	1.76133	5.35422	16.5066	26.4615	7.46084	9.09054	8.48304	24.999	8.66712	6.59596	18.5441	14.632	11.4393	13.8796	19.4035	1.39414	4.19716	8.04509
ACTN1	575.181	681.511	282.051	628.149	237.65	260.931	307.298	495.2	301.713	361.873	227.498	274.067	336.233	374.972	236.692	333.155	416.977	342.097	224.393	263.519	513.046	485.627	291.299	346.833	583.819	722.415
ACTN2	2412.36	3055.89	3490.06	3313.8	2893.37	3369.04	3140.36	2987.23	4207.83	3777.3	3443.83	3244.53	3781.14	3374.54	3877.15	3903.59	3259.74	2750.76	2522.24	2652.94	3585.84	2678.28	3280.45	3301.86	2856.26	3432.32
ACTN3	20.8966	17.2859	19.6503	4.46464	16.9653	8.68582	12.891	3.27713	3.55508	27.6323	3.50447	13.0167	9.04207	28.1784	2.75126	24.6501	15.9459	17.0625	5.63228	31.6242	10.3755	8.95982	29.3791	3.44616	4.97408	3.45591
ACTN4	396.906	307.959	329.067	178.497	343.816	243.972	341.956	313.134	295.162	197.099	246.175	171.518	268.858	234.24	167.056	164.12	225.797	110.903	281.733	279.817	283.845	183.865	263.457	155.247	283.1	215.308
ACTR10	1181.81	1363.43	1394.87	1195.4	1413.14	1473.93	1193.86	1248.32	1200.38	1300.98	1292.08	1306.76	1278.16	1422.26	1483.67	1142.66	1493.66	1182.46	1427.36	1374.63	1338.46	1160.14	1402.69	1185.18	971.98	1143.67
ACTR1A	320.319	420.496	377.485	484.615	331.381	373.578	341.176	378.374	352.57	421.704	362.104	409.776	342.918	409.762	387.484	327.336	430.532	393.985	422.061	394.25	388.367	350.963	365.948	312.439	411.029	340.061
ACTR1B	315.669	497.245	350.417	417.646	335.337	374.489	338.114	473.827	317.808	429.506	332.112	365.061	330.264	343.052	306.632	275.299	331.995	313.523	356.563	318.857	296.329	240.185	319.538	267.104	354.719	350.288
ACTR2	295.567	312.643	202.243	336.61	313.808	376.834	355.993	443.897	246.801	319.453	247.864	326.696	315.001	348.133	247.805	375.111	258.821	473.912	252.373	304.45	243.867	468.091	217.783	322.241	260.328	371.958
ACTR3	700.557	665.333	605.726	750.441	582.745	564.845	647.197	742.603	642.436	631.759	642.762	629.719	621.028	646.235	879.319	1170.76	758.183	690.308	593.176	601.865	901.606	917.235	744.02	818.629	740.23	877.836
ACTR3B	64.8228	89.5667	61.2642	75.3264	82.3203	80.0393	75.7403	51.6638	65.264	61.8833	59.7879	46.8307	57.4091	66.0201	43.3173	68.6783	54.5272	69.2915	57.1575	36.2331	44.4255	42.9381	65.3278	68.2867	49.1422	22.9941
ACTR3BP2	9.66047	15.6161	18.8036	13.2251	10.0301	9.00254	9.11232	7.00202	11.1209	12.0759	12.1815	11.5364	9.51984	14.5106	10.2302	33.8682	7.19233	20.8904	8.33672	2.73382	14.6868	18.1183	23.0204	35.0381	15.8978	9.65428
ACTR3C	17.2326	24.4777	7.20441	24.1513	8.32635	23.8801	6.56268	18.6883	35.4946	35.9835	47.9516	33.7583	26.0919	30.0807	56.816	6.39491	30.4854	7.99901	23.0844	24.4966	33.5517	24.9341	46.0647	55.5064	45.5026	49.5985
ACTR5	26.3321	42.0513	35.1869	27.7114	31.5056	41.2424	28.8383	54.5842	34.9338	27.9482	34.5146	32.8894	48.162	53.6441	22.9108	50.599	30.3944	44.737	26.5254	32.7126	37.2995	45.913	29.3919	53.7663	26.4689	24.2496
ACTR6	122.58	165.473	125.893	177.223	111.427	120.894	132.191	137.264	116.536	131.275	136.178	135.331	107.595	119.025	83.6919	75.0282	100.729	93.127	89.9739	111.764	123.087	124.394	94.0085	85.6113	89.2969	71.9148
ACTR8	96.3953	110.072	127.798	101.298	108.316	109.752	112.351	110.995	107.366	103.283	124.7	129.321	111.155	132.465	106.429	110.478	157.146	153.457	97.5921	101.208	122.871	111.397	132.551	118.616	123.835	103.458
ACTRT2	2.38139	4.90336	2.15665	1.70678	1.94106	3.48734	1.59104	1.8395	1.50373	3.91089	4.17224	3.31369	3.39106	2.82119	6.0193	6.05453	3.00873	3.44472	3.17259	3.35165	2.77648	1.84849	3.32497	4.52189	2.52434	4.19656
ACTRT3	3.58663	30.8621	14.2422	32.6976	8.44681	17.5197	13.8476	14.645	12.4265	29.6721	13.8416	32.2374	4.20012	17.7497	17.2073	23.4812	13.9429	12.0393	13.5492	20.5456	16.9873	32.5042	19.2106	9.83108	17.1239	29.022
ACVR1	340.454	403.164	293.22	359.798	320.209	338.617	298.431	290.624	215.845	274.185	343.044	392.113	323.741	321.161	304.238	291.62	351.705	287.547	339.919	442.416	328.332	411.115	313.973	330.254	280.577	304.389
ACVR1B	57.4343	44.9915	67.1989	47.228	52.8226	40.8111	48.1497	47.136	52.5332	40.6034	60.8645	72.6979	54.8031	52.6943	69.6919	95.2262	58.489	66.5365	61.3362	54.9958	76.1927	72.9222	63.2916	60.1279	57.6254	75.8561
ACVR1C	64.0353	14.325	20.8814	22.2916	14.221	10.2996	10.4202	7.16021	21.9013	22.6746	20.4502	13.2087	22.1528	8.61842	16.7433	27.7685	15.4137	26.7358	17.4683	19.6851	11.0523	20.2057	9.08128	30.8889	14.7906	12.5698
ACVR2A	145.877	97.04	225.976	107.208	106.43	104.347	111.619	108.588	132.591	147.803	121.926	103.12	112.082	91.9183	123.895	115.399	120.171	123.363	97.5736	93.0667	93.6191	123.543	115.142	97.9925	144.618	88.009
ACVR2B	68.5293	54.8563	74.177	54.1526	33.0593	27.1928	53.7186	40.9396	45.2851	71.4141	63.3313	47.3944	41.108	32.7171	46.2436	63.5018	54.5079	59.0713	32.1396	49.277	46.8758	57.5301	60.3797	44.0977	39.0638	37.1671
ACVR2B-AS1	18.6289	21.9111	25.9134	49.6541	36.1207	24.2576	48.9974	43.9703	17.2596	3.09509	24.9577	42.4776	51.9845	41.6326	24.7501	58.5768	36.8201	31.7777	26.1806	4.80386	3.8711	37.1868	51.249	44.4355	26.2548	30.4814
ACVRL1	74.0112	62.5226	69.6368	59.5558	37.0492	55.0461	63.1794	74.0248	70.0729	63.9496	61.3778	81.1263	67.0222	95.2942	80.9427	162.084	51.5922	70.2786	91.094	79.0664	92.6317	93.648	83.6636	72.8153	69.7135	103.256
ACY1	13.7992	1.93623	6.22401	5.78077	8.40018	4.57395	22.5724	3.73364	3.14628	14.0868	3.22425	3.86409	11.6735	4.3679	7.8488	35.8323	4.3803	6.0423	3.78037	4.28997	5.29566	9.33823	4.61018	7.4323	7.06265	8.31782
ACY3	6.07789	13.4676	14.5357	13.3679	12.066	4.56558	8.35891	11.2501	9.62539	22.0205	13.6803	5.22558	16.321	23.5071	14.1862	57.5353	8.01394	5.15845	27.4281	13.646	23.1982	30.0925	19.5027	6.49847	15.3604	14.0847
ACYP1	83.741	58.6974	69.2985	111.953	73.8645	116.513	73.1585	112.328	157.609	69.687	109.578	89.2639	114.38	72.9639	59.4062	51.5999	60.121	92.3624	69.039	55.4136	63.3481	78.5266	83.8282	81.398	82.7012	50.0976
ADA	35.6248	30.3249	72.5828	18.4083	51.674	57.2602	67.2919	47.1955	35.4836	51.7089	41.9839	28.1044	83.8193	69.904	136.609	57.411	64.9937	43.2649	80.6874	81.6862	122.523	25.987	72.8027	64.2134	64.1004	78.4326
ADAD1	9.25837	21.7113	28.3198	18.3753	15.3386	17.0025	24.0462	15.4771	11.3639	35.6907	9.9048	19.7505	13.8733	29.0835	2.3988	40.6677	27.0587	25.643	20.1879	31.3933	5.06123	37.9153	22.6551	24.1072	21.8548	9.97759
ADAD2	5.32412	19.6445	51.4656	109.897	6.22305	31.4787	14.6063	17.693	3.61502	42.6475	2.88625	34.1072	7.18285	7.61986	7.59597	36.6417	24.5354	36.1977	4.08006	27.2548	15.5757	5.31831	8.45819	10.7996	4.72969	11.1328
ADAL	61.6937	81.3332	86.1886	82.2207	92.0325	66.1147	67.8391	69.2299	90.2107	84.3423	83.6372	82.3878	79.0247	100.9	59.3175	47.9204	94.5695	82.9249	99.6296	91.2309	46.791	61.0512	70.647	63.8482	98.4346	64.8043
ADAM10	308.569	294.841	242.144	238.862	293.907	367.529	303.713	354.828	302.244	324.393	315.704	263.36	287.577	306.983	241.012	343.335	263.572	358.414	202.979	316.031	293.875	370.855	392.291	447.596	287.709	252.728
ADAM11	4.8901	9.34308	14.6314	9.81898	26.0171	35.8835	13.1503	11.4083	18.5152	22.8737	23.0608	21.065	23.052	18.4572	32.2853	54.9142	14.7865	25.1538	28.0314	27.9804	9.61503	14.4756	33.3328	35.4193	20.7344	21.9228
ADAM12	17.1781	14.521	20.2041	15.1736	11.3836	8.07676	17.7562	16.7878	21.3387	26.6772	12.5411	18.0945	7.28838	14.5089	13.5792	29.3184	34.1718	22.9798	10.8493	14.1739	10.793	17.4243	18.6752	9.24851	17.9178	14.5472
ADAM15	76.5447	118.492	79.7767	72.9737	40.6907	108.867	37.3794	90.3509	85.4157	58.3201	76.5302	49.8358	54.6455	51.6935	53.8698	27.1317	37.989	29.8233	61.653	78.8463	87.1363	43.4245	53.5141	95.1945	60.2905	85.7043
ADAM17	108.926	98.2474	72.5653	92.6614	85.34	84.9224	108.816	107.089	93.4636	63.0686	62.5518	87.3219	86.8771	84.4732	132.173	142.995	91.7707	93.2606	99.0924	89.6846	89.2001	105.488	86.6084	98.0022	91.8813	100.998
ADAM18	10.2807	7.81884	13.0539	5.96981	12.4498	14.3008	4.09626	1.49196	13.3	14.7734	11.2106	25.3015	8.49086	4.54773	15.0255	8.76509	8.1558	22.2626	7.26804	14.5321	20.0449	14.1464	17.1964	13.8095	12.5636	7.48775
ADAM19	51.2777	103.704	32.29	69.8217	73.6388	99.3997	67.705	66.0455	92.763	70.1689	48.3638	68.2875	59.417	81.0607	158.485	225.554	68.1551	44.5331	48.9985	72.6437	82.7392	71.8039	85.886	98.6557	180.438	122.681
ADAM2	1.07384	1.25393	0.566389	0.551762	3.27431	0.705129	1.60046	3.80652	1.67136	19.1537	1.71665	5.33569	11.434	2.25652	1.09807	2.42478	1.06793	19.0063	1.38614	2.16885	8.81893	2.0509	1.39832	24.6877	8.38277	18.192
ADAM20	14.4396	14.7114	28.3145	11.0609	5.57641	26.1468	11.5318	9.18232	22.0556	23.2611	12.9726	31.5359	21.362	14.443	16.4379	21.4328	22.514	3.69751	17.4338	11.0244	21.0496	17.3062	9.98381	31.8595	11.8806	18.0079
ADAM21	19.3233	13.0304	12.7322	12.445	10.1828	17.6276	10.5375	2.41581	17.4878	15.3979	12.8657	25.6813	15.0659	15.2586	4.8828	16.0417	6.13894	11.4232	15.5736	30.926	6.07726	20.7424	16.5739	22.1796	11.5672	11.9394
ADAM22	17.801	19.9012	13.935	11.3938	8.60576	14.0262	9.95489	4.23929	11.325	12.83	11.8215	17.4242	9.52829	17.9241	13.4648	18.6775	16.7739	12.4486	13.5563	17.6861	13.1231	15.3889	10.1838	6.77686	9.61198	15.2954
ADAM23	126.204	131.695	154.507	136.954	171.871	174.147	183.622	115.082	137.002	151.8	150.07	202.893	172.379	180.019	145.572	163.597	130.862	214.775	195.48	183.117	135.903	123.198	141.602	155.957	143.882	122.28
ADAM28	12.3304	6.95746	12.5533	18.2919	4.05662	10.7561	7.69461	25.5087	4.17002	6.47285	6.6748	14.4207	4.60415	11.5144	2.46099	21.6851	14.5639	10.8936	8.2412	17.5417	10.4886	11.1655	6.92113	23.6115	10.1739	18.2342
ADAM30	9.81939	15.086	5.30805	6.44536	6.29333	10.2059	13.6981	3.63761	3.03579	25.4463	11.2268	2.83237	11.3472	9.51527	4.27761	11.7524	24.5416	5.04745	10.0861	12.8903	3.84125	24.1433	6.50917	5.89281	9.35837	6.48844
ADAM32	1.23554	7.39858	1.94869	27.9437	4.66346	21.0146	5.52814	5.97503	4.6677	17.0564	14.837	13.6044	1.05686	18.2249	24.8065	8.83744	10.1297	5.47356	1.82669	25.2899	13.5635	18.0584	2.87814	32.3237	2.8554	24.7484
ADAM33	102.639	82.151	75.9524	84.5855	78.636	129.361	71.0633	97.3119	56.9274	80.5903	93.2536	106.848	40.0299	85.5259	36.7239	26.311	46.4208	72.3332	76.9045	69.6068	113.782	58.629	40.1334	35.6901	42.2715	54.1199
ADAM3A	12.2923	12.0466	11.5331	8.90239	8.97512	2.71837	2.09732	17.628	3.04807	12.6618	6.63069	3.24512	11.8461	18.731	4.79505	32.5797	8.3627	18.9341	7.99877	27.93	6.95002	27.8164	9.32421	22.7438	7.49568	14.2328
ADAM3B	2.06393	10.2416	2.88518	16.889	0.964064	7.2158	2.97016	4.00678	16.2003	27.0144	9.72618	26.1805	7.79197	8.45345	24.271	7.02032	10.2421	16.8355	17.8769	14.7104	1.0199	24.8434	3.72443	1.05063	8.86277	24.1658
ADAM5	18.8562	10.3947	42.9496	13.4136	24.2227	16.8876	16.3103	3.22991	8.44231	31.8342	12.6337	15.2731	13.831	22.9408	9.1678	3.38361	12.8199	7.7663	19.901	27.1761	14.5749	4.18359	19.4783	9.02103	18.455	40.4303
ADAM6	4.04173	11.3054	9.91941	13.0068	20.4731	4.37118	18.9668	17.0389	5.31182	37.2902	23.0947	27.2547	16.4458	22.5751	3.92069	4.34772	3.46239	25.98	10.0184	4.53193	6.36385	25.7771	14.1203	9.66461	22.7724	35.3898
ADAM7	5.65824	0.75256	5.8021	9.77384	1.46648	6.43618	2.40242	11.7159	1.01102	6.80423	3.56615	6.02955	7.069	4.00403	6.96618	21.0332	7.97557	8.85266	6.44327	14.3455	6.43158	19.4827	7.63468	3.17237	2.53263	14.1196
ADAM8	24.0057	7.21353	26.4934	17.1375	36.3366	11.0589	34.3437	23.673	16.4808	25.9883	24.5927	18.8312	21.249	11.495	8.85956	30.2776	24.1897	19.8973	25.2522	34.5293	12.3081	26.3325	19.0972	13.0844	10.6411	15.9082
ADAM9	250.378	356.314	357.416	478.884	296.531	401.847	421.267	400.931	361.94	464.778	249.682	341.058	346.527	501.687	308.703	437.227	415.717	474.285	278.67	377.712	515.312	491.845	400.781	472.334	425.619	427.626
ADAMDEC1	12.6055	23.2033	13.7346	4.38851	9.47492	4.95425	48.9807	95.2537	2.90232	9.10302	2.08957	27.7686	17.2128	10.5252	3.31071	32.4364	28.5891	24.9307	18.1266	0.886813	3.81817	6.78581	1.74316	8.05994	0.574529	5.35646
ADAMTS1	782.671	603.328	169.769	186.099	342.801	327.853	161.758	245.182	174.247	234.996	122.192	159.735	226.091	207.894	490.258	524.363	149.36	236.491	439.503	398.941	783.019	777.275	319.802	359.622	630.302	1039.58
ADAMTS10	112.274	70.082	126.298	74.892	113.491	73.6902	196.19	64.0386	138.598	78.4985	89.5399	56.167	120.39	83.521	106.762	46.6427	126.061	88.7503	80.4887	105.891	97.9034	64.2947	112.263	38.3838	100.424	102.786
ADAMTS12	37.1299	26.5729	28.4845	17.2036	28.232	27.2043	37.0818	4.17041	15.9798	24.272	28.6965	27.6853	32.2469	14.818	26.6408	25.0873	30.2098	21.3118	29.3282	8.74191	27.6722	11.1199	32.5396	26.1026	26.5426	40.8518
ADAMTS13	30.8151	7.87665	18.3956	22.0432	26.9423	24.8803	8.84891	38.4115	21.4769	24.0446	14.4579	14.5573	12.6698	26.7535	17.5346	59.486	15.2199	13.8168	10.6029	28.8114	7.40695	17.0876	16.9991	31.5898	4.35548	12.7445
ADAMTS14	10.5102	7.74726	36.448	17.2709	4.94878	26.0776	5.0268	28.9054	7.69123	6.51954	37.5519	4.54658	18.7315	15.4407	25.6758	4.90294	5.64227	3.60924	26.0892	18.7368	35.1479	35.789	31.0272	54.2988	13.2379	78.1369
ADAMTS15	127.747	80.7599	64.3238	31.2442	117.824	85.2481	77.0245	43.1404	65.5908	49.3375	86.9152	55.241	67.0832	44.7748	113.129	115.717	83.9494	115.343	121.618	89.4526	102.844	76.0461	169.25	162.476	123.584	109.18
ADAMTS16	2.35425	1.84247	19.0638	3.15174	3.75702	3.55855	3.0192	2.03814	2.91603	3.31691	5.06888	2.19327	2.25953	10.2135	3.96779	4.66722	4.27062	2.3185	4.20412	3.06025	4.81414	5.37758	11.6913	3.76946	18.0695	4.16786
ADAMTS17	22.1259	5.39087	10.6434	30.9111	12.3817	7.50275	6.67762	10.9403	7.62467	4.4259	13.0563	21.8406	9.22873	18.8209	9.73994	25.2352	19.9536	26.4037	6.03923	14.7068	7.48085	18.3853	11.8734	23.5462	9.18741	9.08015
ADAMTS18	6.90055	14.2006	7.2021	14.1952	11.4473	27.0055	13.8452	13.6948	14.7207	18.7421	11.342	24.9054	10.7179	19.9059	18.5332	13.2644	1.88389	22.006	14.1304	16.8672	15.8426	23.6487	1.43597	4.81435	3.25108	19.4396
ADAMTS19	0.926232	3.43961	6.19943	2.24821	1.974	8.2641	6.88783	3.17872	2.51869	1.21547	1.51737	6.23983	3.14921	5.61177	3.42685	1.61983	1.58177	13.5639	2.47539	1.36236	8.12311	2.79053	3.6684	4.33225	14.7708	2.17786
ADAMTS2	29.4955	46.8325	25.9077	44.1782	26.1845	25.0578	22.0781	20.8456	9.40876	26.3708	12.5681	15.8663	15.186	22.1452	14.6303	44.8415	25.9427	19.3318	14.2701	25.1589	22.438	17.2692	24.1651	8.37785	11.6337	20.7073
ADAMTS20	3.03282	9.53186	10.162	5.77872	0.43833	9.04732	4.16021	9.82667	5.24888	12.0669	4.42501	11.1268	6.46179	11.7788	9.30077	1.24166	2.33558	3.95135	12.5362	9.03152	6.74811	30.7804	1.06106	10.0873	8.75693	26.7499
ADAMTS3	23.4078	30.4722	9.83531	28.8663	4.7748	17.6577	20.2066	20.439	14.712	20.0809	19.5293	21.6284	19.2282	3.95769	2.21682	40.6535	19.0198	13.8985	15.387	7.49935	23.4958	36.2398	13.9237	1.25554	18.0975	18.3412
ADAMTS4	39.1422	21.6742	28.1705	16.0183	10.1791	50.3097	17.3663	39.6856	37.2928	48.1769	34.241	46.3733	40.5443	46.3996	36.8352	91.1835	51.0974	38.6593	43.4618	73.358	32.2602	43.5375	44.7109	52.5978	43.6775	43.8191
ADAMTS5	91.6902	66.4022	165.79	50.0816	369.561	227.521	167.063	124.727	164.556	128.246	147.249	151.307	265.254	135.602	187.282	173.241	89.228	214.278	113.871	90.2262	151.3	185.333	77.357	79.1752	216.523	230.257
ADAMTS6	23.3108	22.5261	12.0525	11.9378	8.71175	18.463	23.0571	15.331	18.0848	25.1797	29.0356	23.7965	22.347	13.288	8.42519	20.6316	17.0603	23.8918	7.86455	21.308	10.0491	19.5982	16.433	28.4756	18.984	25.736
ADAMTS7	12.304	12.0125	22.5036	5.01046	22.3679	8.82908	19.6262	20.1063	24.5666	23.9858	17.4717	9.9027	29.9381	10.7943	23.9832	27.4916	22.6074	37.3978	17.3326	15.0515	29.1667	16.8331	19.8209	15.4484	18.0869	48.8884
ADAMTS8	14.2804	11.1631	6.1954	6.80933	17.5358	13.3165	12.5395	6.04389	13.5351	8.69039	9.21626	5.65726	14.9801	3.62656	30.3022	32.3354	26.336	8.76963	11.2237	5.83467	36.5219	20.7911	26.9968	24.9297	26.0663	36.7864
ADAMTS9	46.1497	36.1575	20.7061	34.463	30.5806	28.4056	43.7342	28.471	30.2473	30.8691	41.0525	38.2112	33.151	23.0495	215.944	290.577	42.2201	61.7674	47.9646	60.9023	164.221	141.005	89.6602	127.249	98.7795	102.71
ADAMTS9-AS1	6.57674	17.7566	3.57347	6.52272	3.39747	5.20278	2.27078	7.26103	5.23715	13.2083	6.46309	17.2578	2.22734	4.2347	9.34999	3.27807	11.206	9.03849	5.08074	7.63875	10.1362	8.18592	10.4431	6.91914	9.45674	8.70006
ADAMTS9-AS2	27.3327	26.5761	23.7582	13.0024	17.4186	19.0844	25.6789	15.2116	27.1984	26.8424	21.9901	28.2878	15.3828	21.2136	17.8854	17.3586	9.85928	25.6046	11.4792	14.6837	13.0501	16.6982	20.3074	19.7566	16.7416	16.6374
ADAMTSL1	11.2021	9.21669	10.6819	11.1999	7.19289	10.1266	8.27517	13.8503	8.07086	16.5759	10.7682	3.12355	3.93038	6.67963	2.98649	15.9622	8.72854	7.13787	9.32127	11.1416	3.39097	4.59225	5.65437	10.5224	8.41262	14.2464
ADAMTSL2	3.30593	5.09852	4.41234	6.77208	3.15676	3.97758	4.08112	2.52384	7.84431	3.59447	4.72651	2.57487	5.90749	5.63	4.85896	2.98953	3.67745	3.42949	3.56681	5.40193	5.24018	4.94657	3.36776	7.64447	4.68356	4.11849
ADAMTSL3	109.167	112.493	59.6222	73.2484	81.0091	65.7729	67.1317	85.2473	72.9492	72.149	118.86	86.9276	79.2424	64.3614	51.6481	54.8254	70.5098	66.0555	60.2355	88.1304	63.3656	76.1534	73.284	67.1598	66.8976	73.5515
ADAMTSL4	46.1131	52.6219	70.603	69.6504	60.5819	71.197	63.2793	59.3641	66.8427	77.4157	70.0271	134.795	75.2639	101.824	78.3995	117.949	33.9295	71.4013	87.4326	70.4429	120.89	87.1329	91.2644	145.988	68.9118	67.4841
ADAMTSL5	1.78759	37.0574	13.1097	18.8429	32.0476	43.5971	16.6288	12.5134	23.3003	34.0553	6.0538	46.0212	5.39731	36.97	20.4195	80.6097	47.8171	28.2793	5.8781	9.75062	17.9713	28.0677	28.7499	53.5959	6.26896	6.42577
ADAP1	97.487	98.5187	107.089	142.734	80.022	84.0768	118.843	114.737	93.6082	75.9839	119.308	77.8778	141.73	115.226	104.526	91.4796	79.9685	88.3708	83.7241	87.4686	91.5296	94.3573	78.7712	126.147	68.365	133.439
ADAP2	61.898	62.6572	71.689	50.5593	45.5889	23.2833	61.5893	79.4963	38.335	39.7384	21.617	31.3571	40.5407	25.7895	53.5769	65.9908	45.0283	51.2626	66.0966	75.8238	93.645	91.0401	74.4119	106.658	75.3685	107.662
ADAR	586.423	495.823	494.567	399.685	470.029	371.31	626.007	551.775	537.816	462.487	459.904	440.32	521.088	409.048	424.709	459.914	499.396	506.338	586.357	533.334	557.063	526.715	406.061	456.673	498.729	579.55
ADARB1	29.6238	18.0979	26.7705	13.127	33.0328	29.2062	29.2046	31.3006	34.2921	32.3482	27.3849	24.6385	29.9588	30.8266	25.9892	29.036	26.0693	31.3257	22.0136	37.7152	27.7477	23.7054	30.8038	27.9855	28.4002	31.2149
ADARB2	1.84708	16.0073	6.3957	6.41868	16.2579	5.92094	2.42832	3.69729	12.2304	16.1873	6.2792	27.5071	4.32523	10.7049	7.42434	15.0507	14.7678	12.3485	5.9109	8.66125	7.99049	11.636	9.68702	12.6604	3.663	3.59727
ADARB2-AS1	41.5569	18.0622	52.4489	34.2102	75.6736	100.664	52.5287	24.2649	58.8801	82.533	62.929	46.3659	50.6664	88.7965	68.372	73.4166	63.4954	78.2989	63.5986	13.7104	45.1148	57.6829	89.373	38.0609	81.0355	78.5819
ADAT1	34.3695	46.542	46.2105	59.9943	51.1159	47.9026	29.2457	45.3519	28.6019	41.1652	44.1878	43.4096	48.9594	48.5315	52.5709	34.7373	39.747	46.9554	59.3381	80.358	28.1396	70.1262	15.2964	36.3031	46.5908	40.4261
ADAT2	18.532	23.0642	15.0763	30.0898	17.7272	12.1957	19.3611	27.8524	10.5362	4.21162	14.4449	4.39964	5.4077	6.48952	5.29534	17.532	12.4821	13.2987	10.3292	37.3629	10.3444	4.82177	14.6331	10.8554	10.4766	4.48784
ADAT3	38.3773	57.1912	48.9356	59.7534	35.3027	51.8172	22.1369	70.8163	32.2084	68.4157	33.3311	63.0573	23.4605	46.2396	43.3451	46.7014	46.7156	37.6745	42.4109	49.3629	39.5155	57.3513	50.4129	48.4929	46.974	41.0425
ADCK1	60.1618	96.0571	73.3813	69.9446	78.7455	92.0535	70.5302	85.0332	65.8981	79.3948	74.7378	80.2655	80.9973	97.0294	64.2878	23.3017	60.1119	65.985	104.689	87.7531	49.0525	64.3089	118.464	99.8721	66.1161	19.864
ADCK2	33.886	38.9801	51.9767	47.9258	32.1404	28.427	34.8695	43.202	37.6389	34.6066	31.7567	48.6486	42.0092	45.9757	33.4582	38.1735	40.8465	28.6599	37.1734	39.4795	45.7681	22.5689	37.5372	47.6388	40.4463	27.1789
ADCK5	17.9596	5.65144	20.6129	3.51388	5.99415	2.1343	7.18663	2.20798	5.59053	3.57698	6.08155	5.89069	5.55958	13.912	12.9947	9.73162	2.84335	4.90564	15.3852	2.5342	4.40807	7.68887	4.52953	9.76107	17.6334	10.9644
ADCY1	23.3092	16.6317	21.8626	11.0379	22.5466	23.0237	37.3948	21.001	28.1502	26.3558	23.2897	13.4177	16.1898	17.9789	19.6807	29.7923	35.901	26.5764	21.0419	21.6543	23.1522	32.4507	35.5623	30.5366	35.791	36.2692
ADCY10	7.41672	2.57651	11.5269	20.1615	12.6744	8.76054	11.2023	3.9879	11.6844	13.3327	2.66799	12.1427	16.5013	21.779	12.7224	31.8772	18.9164	13.5147	7.62384	2.20767	24.0404	9.62527	3.48	11.4114	8.92559	25.1275
ADCY10P1	66.433	27.5356	36.2043	19.6976	22.4441	50.5324	41.5336	30.8624	26.4197	29.0306	23.5539	17.1014	40.2267	27.8646	17.5149	23.0399	9.775	10.091	19.4407	14.697	28.5792	37.4228	42.9342	40.7697	9.08745	25.0205
ADCY2	21.1402	10.3674	10.6296	15.5518	12.5667	9.62663	18.1666	14.8233	6.53363	12.3091	15.364	20.5582	13.7449	23.1931	5.32955	23.722	3.12485	19.5722	24.4522	13.8882	19.5072	19.4066	10.9601	20.2246	16.6524	10.3259
ADCY3	108.257	57.2364	96.3718	73.2287	91.9236	74.1048	87.1484	66.6306	96.5275	44.7505	83.7443	84.1721	112.859	63.6219	146.576	96.0008	101.115	78.0587	90.1677	64.4677	155.738	125.158	109.336	161.492	105.657	166.106
ADCY4	167.036	98.9477	172.775	85.914	73.4487	44.1396	153.563	122.398	98.8893	62.6212	134.959	64.8353	146.791	110.301	100.284	119.7	110.244	183.218	177.536	155.087	112.079	129.724	185.244	164.963	168.888	162.421
ADCY5	90.7097	104.368	139.77	90.882	129.61	86.304	103.181	85.4734	83.0392	66.7037	136.898	94.5028	93.3308	62.3791	53.4853	47.4197	71.0989	60.1183	91.6878	82.5309	49.1275	43.7978	41.97	61.6105	119.943	86.3955
ADCY6	320.061	506.787	311.25	347.13	286.553	332.723	398.157	413.817	312.55	367.681	309.752	333.094	320.996	338.12	325.918	280.691	268.108	291.415	383.266	361.329	303.653	222.123	324.115	432.969	305.911	207.959
ADCY7	33.9738	33.5905	20.8629	38.7728	45.051	31.6183	37.8149	69.5372	28.9693	34.4435	28.6084	43.3369	35.0495	38.4175	21.8271	37.5475	20.0602	34.1654	27.6784	38.5184	51.6093	70.5012	14.006	57.4704	32.5178	59.4
ADCY8	4.0499	12.9025	22.9218	7.70111	16.936	2.19493	4.05308	15.8597	18.4596	7.04499	11.0947	3.36508	6.69262	9.42968	13.4106	6.10335	3.92982	29.6092	14.5057	6.89784	17.212	12.4175	6.3431	9.46969	6.33283	8.49326
ADCY9	150.26	150.842	237.783	144.017	161.997	167.402	208.371	166.11	173.413	182.482	181.599	187.562	190.895	187.038	184.732	158.661	175.524	170.806	226.624	198.726	160.133	155.212	236.924	209.654	231.891	173.589
ADCYAP1	1.30428	5.83355	0.999587	2.19085	13.5936	3.031	2.62296	10.2198	4.20158	4.05002	6.23665	4.81032	1.83301	3.60674	1.68889	2.20172	5.91969	14.2195	6.20483	9.53521	11.6869	24.065	2.2775	3.35705	2.50607	3.57559
ADCYAP1R1	26.7842	14.3528	18.1126	15.0883	32.9668	35.3693	19.9355	15.3784	31.9855	28.3428	41.5522	28.2562	23.4587	20.7231	39.3355	32.966	32.6525	42.9467	34.0593	42.9571	22.3305	21.0594	31.6657	45.5701	35.846	25.4837
ADD1	447.787	462.324	406.295	468.383	428.821	493.569	418.545	435.867	389.009	471.165	438.103	429.938	430.748	435.453	318.266	289.063	363.603	375.012	411.428	412.16	381.336	308.934	383.111	363.788	382.876	369.263
ADD2	18.5661	13.816	29.9968	19.1895	13.6811	21.8525	22.9704	23.2114	23.778	24.1969	18.8308	31.7095	30.7988	28.3357	11.896	27.3931	23.8784	30.2072	17.5738	19.8799	18.5515	18.4126	32.4325	36.3336	19.9555	25.456
ADD3	1337.82	1392.23	1353.05	1307.56	1616.59	1500.45	1313.67	1235.81	1309.2	1457.46	1341.2	1434.76	1311.67	1232.1	885.477	783.174	967.35	1233.72	1279.13	1302.21	1069.67	1364.01	876.175	1043.76	1091.11	1107.13
ADD3-AS1	17.5527	10.6232	8.4657	10.6997	14.9366	13.7823	15.9281	5.63992	18.5832	16.5869	12.8199	10.0323	5.91417	24.9131	15.4352	6.1733	6.42691	10.2258	11.749	30.6647	11.3275	14.5572	8.48987	16.3641	18.8504	23.0479
ADGB	0.376846	6.2347	2.70004	15.4514	1.95974	3.66385	10.1537	14.6526	11.1254	1.2148	14.0096	2.54864	19.6225	2.984	14.6518	0.740257	0.805409	27.7301	1.94806	2.26883	4.87537	1.04048	4.16615	2.54907	1.49052	3.26474
ADGRA1	1.57938	12.7581	3.8817	12.359	2.32705	2.10794	12.9507	17.5726	12.929	10.9653	2.5515	16.8781	3.42363	8.49495	30.9475	2.03214	28.8017	7.19908	3.15117	20.2598	1.94978	36.9061	19.547	27.2656	15.2566	11.3003
ADGRA2	145.839	125.088	94.5079	101.898	96.377	96.2927	128.661	143.124	84.5428	105.761	112.945	95.4547	89.4058	118.287	78.5456	19.8166	97.8094	92.6235	80.3981	114.994	96.8446	72.0545	84.4577	83.8482	87.2363	88.3116
ADGRA3	70.4336	50.9361	72.2193	56.066	69.8241	58.7745	69.6549	53.6551	61.1037	55.2381	78.184	76.2034	52.7991	64.7799	56.0992	55.8042	57.7788	85.388	83.2255	85.3021	72.8349	85.8965	109.213	126.08	60.7159	88.5922
ADGRB1	20.0155	14.5119	15.4088	6.02799	12.1105	39.3409	13.7618	9.33117	11.522	14.51	9.29693	16.3487	13.1468	14.4171	13.9542	12.6663	2.67788	11.9657	9.95075	28.1078	10.734	9.84113	31.7627	6.3937	11.1403	66.8591
ADGRB2	19.1941	53.2268	45.5378	73.2481	34.8817	78.7052	40.8595	70.3833	44.8211	111.516	56.2118	92.3459	29.7937	97.0336	12.3834	65.4958	38.0514	46.0826	32.5846	41.6086	42.7906	44.7033	34.1039	97.6775	40.5168	47.3532
ADGRB3	19.4361	19.8315	15.519	24.2092	20.4799	14.5419	18.5681	15.2528	23.4233	11.1178	17.0145	16.3313	14.9219	10.6306	10.4054	29.7715	12.2543	30.1063	17.0729	12.9214	17.9028	27.689	32.678	22.9363	22.5071	20.752
ADGRD1	266.915	231.103	151.09	100.693	352.041	328.807	243.641	296.435	255.024	257.057	361.77	250.591	362.608	337.762	339.124	268.201	231.457	247.421	438.928	358.528	295.082	290.353	439.313	413.671	340.34	227.938
ADGRD2	7.28084	24.3849	28.325	36.4439	30.0612	29.3093	9.85511	20.3403	35.2787	8.34176	20.5367	22.65	5.72105	28.9135	9.64588	41.2248	5.38362	6.90236	36.0083	12.7882	9.51428	89.7098	28.1665	10.9637	12.8309	9.40885
ADGRE1	0.901433	6.86025	28.0402	11.9664	21.5374	6.29282	9.4309	18.4895	9.37095	11.3792	22.0006	6.74549	6.75823	4.52431	27.7199	24.9887	29.583	27.1162	27.8271	45.9259	21.0703	3.60344	27.8343	56.0276	14.1655	3.15346
[truncated: 21,421 more rows]

## Sheet: GSE42955
GSE42955
[truncated: 20,003 more rows]

## Sheet: GSE120895
GSE120895
[truncated: 21,756 more rows]
[truncated: 6 more columns]
