# Supplementary material for: Multiple effect mechanisms of FLNC in dilated cardiomyopathy based on genetic variants, transcriptomics, and immune infiltration analysis
Source: Research Square preprint supplement (doi:10.21203/rs.3.rs-2795537/v1), 2023-04-12
Supplement: Supplementary file 4 [file 5281b9c50b1de71b3bcb5369.xlsx]

## Sheet: GO and KEGG
up GO
ONTOLOGY	ID	Description	GeneRatio	BgRatio	pvalue	p.adjust	qvalue	geneID	Count
BP	GO:0051085	chaperone cofactor-dependent protein refolding	44607	32/18800	0.000290671	0.0277562	0.0201497	DNAJB5/HSPA2	2
BP	GO:0051084	'de novo' post-translational protein folding	44607	37/18800	0.000389398	0.0277562	0.0201497	DNAJB5/HSPA2	2
BP	GO:0006458	'de novo' protein folding	44607	41/18800	0.000478556	0.0277562	0.0201497	DNAJB5/HSPA2	2
BP	GO:0061077	chaperone-mediated protein folding	44607	70/18800	0.0013907	0.0604954	0.0439168	DNAJB5/HSPA2	2
MF	GO:0051015	actin filament binding	44634	214/18410	0.000512865	0.0179503	0.0102573	XIRP1/FLNC/MYO7B	3
MF	GO:0051087	chaperone binding	44606	106/18410	0.00285649	0.0282103	0.0161202	DNAJB5/HSPA2	2
MF	GO:0003774	cytoskeletal motor activity	44606	111/18410	0.00312688	0.0282103	0.0161202	KIFC3/MYO7B	2
MF	GO:0051082	unfolded protein binding	44606	121/18410	0.00370235	0.0282103	0.0161202	DNAJB5/HSPA2	2
MF	GO:0003779	actin binding	44634	439/18410	0.00403004	0.0282103	0.0161202	XIRP1/FLNC/MYO7B	3
MF	GO:0008569	minus-end-directed microtubule motor activity	44575	18/18410	0.0136063	0.0628127	0.0358929	KIFC3	1
MF	GO:0003746	translation elongation factor activity	44575	19/18410	0.0143572	0.0628127	0.0358929	GTPBP1	1
MF	GO:0030506	ankyrin binding	44575	19/18410	0.0143572	0.0628127	0.0358929	FLNC	1
MF	GO:0051787	misfolded protein binding	44575	29/18410	0.0218365	0.0742191	0.0424109	HSPA2	1
MF	GO:0051861	glycolipid binding	44575	29/18410	0.0218365	0.0742191	0.0424109	HSPA2	1
MF	GO:0000146	microfilament motor activity	44575	31/18410	0.023326	0.0742191	0.0424109	MYO7B	1
MF	GO:0097718	disordered domain specific binding	44575	35/18410	0.0262987	0.0767046	0.0438312	HSPA2	1
MF	GO:0044183	protein folding chaperone	44575	43/18410	0.032219	0.0805475	0.0460271	HSPA2	1
MF	GO:0048156	tau protein binding	44575	43/18410	0.032219	0.0805475	0.0460271	HSPA2	1
down GO
ONTOLOGY	ID	Description	GeneRatio	BgRatio	pvalue	p.adjust	qvalue	geneID	Count
BP	GO:0002366	leukocyte activation involved in immune response	8/34	285/18800	3.26153e-08	1.83658e-05	1.0957e-05	LCP1/HLA-DRA/PTPRC/CX3CR1/HLA-DRB1/VAMP8/DOCK11/HLA-DMB	8
BP	GO:0002263	cell activation involved in immune response	8/34	289/18800	3.6332e-08	1.83658e-05	1.0957e-05	LCP1/HLA-DRA/PTPRC/CX3CR1/HLA-DRB1/VAMP8/DOCK11/HLA-DMB	8
BP	GO:0002285	lymphocyte activation involved in immune response	6/34	201/18800	1.45258e-06	0.000430124	0.00025661	LCP1/HLA-DRA/PTPRC/HLA-DRB1/DOCK11/HLA-DMB	6
BP	GO:0006968	cellular defense response	4/34	54/18800	2.64427e-06	0.000430124	0.00025661	CXCL9/TRAT1/CX3CR1/ITK	4
BP	GO:0002697	regulation of immune effector process	7/34	353/18800	2.69566e-06	0.000430124	0.00025661	HLA-DRA/PTPRC/CX3CR1/HLA-DRB1/VAMP8/HLA-DMB/TLR3	7
BP	GO:0002399	MHC class II protein complex assembly	3/34	16/18800	2.97811e-06	0.000430124	0.00025661	HLA-DRA/HLA-DRB1/HLA-DMB	3
BP	GO:0002503	peptide antigen assembly with MHC class II protein complex	3/34	16/18800	2.97811e-06	0.000430124	0.00025661	HLA-DRA/HLA-DRB1/HLA-DMB	3
BP	GO:0002703	regulation of leukocyte mediated immunity	6/34	236/18800	3.67979e-06	0.000465033	0.000277436	HLA-DRA/PTPRC/CX3CR1/HLA-DRB1/VAMP8/TLR3	6
BP	GO:0002396	MHC protein complex assembly	3/34	20/18800	6.03266e-06	0.000609902	0.000363865	HLA-DRA/HLA-DRB1/HLA-DMB	3
BP	GO:0002501	peptide antigen assembly with MHC protein complex	3/34	20/18800	6.03266e-06	0.000609902	0.000363865	HLA-DRA/HLA-DRB1/HLA-DMB	3
BP	GO:1902107	positive regulation of leukocyte differentiation	5/34	157/18800	8.71904e-06	0.000690788	0.000412121	HLA-DRA/EVI2B/PTPRC/HLA-DRB1/HCLS1	5
BP	GO:1903708	positive regulation of hemopoiesis	5/34	157/18800	8.71904e-06	0.000690788	0.000412121	HLA-DRA/EVI2B/PTPRC/HLA-DRB1/HCLS1	5
BP	GO:0002381	immunoglobulin production involved in immunoglobulin-mediated immune response	4/34	73/18800	8.88254e-06	0.000690788	0.000412121	HLA-DRA/PTPRC/HLA-DRB1/HLA-DMB	4
BP	GO:1902105	regulation of leukocyte differentiation	6/34	283/18800	1.04115e-05	0.000751859	0.000448555	HLA-DRA/EVI2B/PTPRC/HLA-DRB1/HCLS1/TLR3	6
BP	GO:0051607	defense response to virus	6/34	290/18800	1.1963e-05	0.000770836	0.000459877	CXCL9/RNASE6/PTPRC/APOBEC3G/VAMP8/TLR3	6
BP	GO:0140546	defense response to symbiont	6/34	291/18800	1.21992e-05	0.000770836	0.000459877	CXCL9/RNASE6/PTPRC/APOBEC3G/VAMP8/TLR3	6
BP	GO:0002443	leukocyte mediated immunity	7/34	457/18800	1.45946e-05	0.00086795	0.000517815	HLA-DRA/PTPRC/CX3CR1/HLA-DRB1/VAMP8/HLA-DMB/TLR3	7
BP	GO:0001910	regulation of leukocyte mediated cytotoxicity	4/34	85/18800	1.62728e-05	0.000913988	0.000545281	HLA-DRA/PTPRC/CX3CR1/HLA-DRB1	4
BP	GO:0001916	positive regulation of T cell mediated cytotoxicity	3/34	30/18800	2.12207e-05	0.00107271	0.000639971	HLA-DRA/PTPRC/HLA-DRB1	3
BP	GO:0019886	antigen processing and presentation of exogenous peptide antigen via MHC class II	3/34	30/18800	2.12207e-05	0.00107271	0.000639971	HLA-DRA/HLA-DRB1/HLA-DMB	3
BP	GO:0031341	regulation of cell killing	4/34	100/18800	3.09164e-05	0.00143023	0.000853269	HLA-DRA/PTPRC/CX3CR1/HLA-DRB1	4
BP	GO:0002495	antigen processing and presentation of peptide antigen via MHC class II	3/34	34/18800	3.11227e-05	0.00143023	0.000853269	HLA-DRA/HLA-DRB1/HLA-DMB	3
BP	GO:0002573	myeloid leukocyte differentiation	5/34	210/18800	3.54415e-05	0.00155788	0.000929427	CSF1R/EVI2B/HLA-DRB1/HCLS1/TLR3	5
BP	GO:0002504	antigen processing and presentation of peptide or polysaccharide antigen via MHC class II	3/34	36/18800	3.70434e-05	0.00156045	0.000930958	HLA-DRA/HLA-DRB1/HLA-DMB	3
BP	GO:0071222	cellular response to lipopolysaccharide	5/34	217/18800	4.14451e-05	0.00167604	0.000999918	CXCL9/CXCL11/MRC1/CX3CR1/LY86	5
BP	GO:0002478	antigen processing and presentation of exogenous peptide antigen	3/34	38/18800	4.36591e-05	0.00169767	0.00101282	HLA-DRA/HLA-DRB1/HLA-DMB	3
BP	GO:1903706	regulation of hemopoiesis	6/34	371/18800	4.7801e-05	0.00178988	0.00106783	HLA-DRA/EVI2B/PTPRC/HLA-DRB1/HCLS1/TLR3	6
BP	GO:0001914	regulation of T cell mediated cytotoxicity	3/34	40/18800	5.10061e-05	0.00184168	0.00109874	HLA-DRA/PTPRC/HLA-DRB1	3
BP	GO:0071219	cellular response to molecule of bacterial origin	5/34	229/18800	5.35426e-05	0.00186404	0.00111208	CXCL9/CXCL11/MRC1/CX3CR1/LY86	5
BP	GO:0002286	T cell activation involved in immune response	4/34	116/18800	5.53128e-05	0.00186404	0.00111208	LCP1/HLA-DRA/HLA-DRB1/HLA-DMB	4
BP	GO:0002761	regulation of myeloid leukocyte differentiation	4/34	117/18800	5.71977e-05	0.00186538	0.00111288	EVI2B/HLA-DRB1/HCLS1/TLR3	4
BP	GO:0009615	response to virus	6/34	392/18800	6.48823e-05	0.00204987	0.00122295	CXCL9/RNASE6/PTPRC/APOBEC3G/VAMP8/TLR3	6
BP	GO:0050851	antigen receptor-mediated signaling pathway	5/34	244/18800	7.23197e-05	0.00221561	0.00132182	TRAT1/PTPRC/ITK/HLA-DRB1/BMX	5
BP	GO:0002699	positive regulation of immune effector process	5/34	248/18800	7.8094e-05	0.00226765	0.00135287	HLA-DRA/PTPRC/HLA-DRB1/VAMP8/HLA-DMB	5
BP	GO:0050852	T cell receptor signaling pathway	4/34	127/18800	7.8722e-05	0.00226765	0.00135287	TRAT1/PTPRC/ITK/HLA-DRB1	4
BP	GO:0001774	microglial cell activation	3/34	47/18800	8.299e-05	0.00226765	0.00135287	PTPRC/CX3CR1/TLR3	3
BP	GO:0019884	antigen processing and presentation of exogenous antigen	3/34	47/18800	8.299e-05	0.00226765	0.00135287	HLA-DRA/HLA-DRB1/HLA-DMB	3
BP	GO:0070663	regulation of leukocyte proliferation	5/34	254/18800	8.74154e-05	0.00229259	0.00136775	LST1/CSF1R/PTPRC/HLA-DRB1/HLA-DMB	5
BP	GO:0001909	leukocyte mediated cytotoxicity	4/34	131/18800	8.87948e-05	0.00229259	0.00136775	HLA-DRA/PTPRC/CX3CR1/HLA-DRB1	4
BP	GO:0071216	cellular response to biotic stimulus	5/34	256/18800	9.07058e-05	0.00229259	0.00136775	CXCL9/CXCL11/MRC1/CX3CR1/LY86	5
BP	GO:0030225	macrophage differentiation	3/34	49/18800	9.40632e-05	0.00231946	0.00138378	CSF1R/HLA-DRB1/HCLS1	3
BP	GO:0001913	T cell mediated cytotoxicity	3/34	50/18800	9.99437e-05	0.00234984	0.0014019	HLA-DRA/PTPRC/HLA-DRB1	3
BP	GO:0002269	leukocyte activation involved in inflammatory response	3/34	50/18800	9.99437e-05	0.00234984	0.0014019	PTPRC/CX3CR1/TLR3	3
BP	GO:1903131	mononuclear cell differentiation	6/34	433/18800	0.000112203	0.00257812	0.0015381	HLA-DRA/CSF1R/PTPRC/ITK/HLA-DRB1/DOCK11	6
BP	GO:0050867	positive regulation of cell activation	6/34	436/18800	0.000116526	0.00261795	0.00156186	HLA-DRA/PTPRC/HLA-DRB1/VAMP8/HLA-DMB/RPS6KA1	6
BP	GO:0032103	positive regulation of response to external stimulus	6/34	442/18800	0.00012557	0.00270725	0.00161513	CSF1R/ALOX5AP/CX3CR1/VAMP8/LY86/TLR3	6
BP	GO:0061900	glial cell activation	3/34	54/18800	0.000125856	0.00270725	0.00161513	PTPRC/CX3CR1/TLR3	3
BP	GO:0002763	positive regulation of myeloid leukocyte differentiation	3/34	55/18800	0.000132953	0.00280032	0.00167066	EVI2B/HLA-DRB1/HCLS1	3
BP	GO:0044403	biological process involved in symbiotic interaction	5/34	286/18800	0.0001525	0.00314649	0.00187718	CSF1R/MRC1/CX3CR1/HLA-DRB1/VAMP8	5
BP	GO:0001912	positive regulation of leukocyte mediated cytotoxicity	3/34	58/18800	0.000155793	0.00315013	0.00187935	HLA-DRA/PTPRC/HLA-DRB1	3
BP	GO:0002711	positive regulation of T cell mediated immunity	3/34	59/18800	0.000163936	0.0032498	0.00193881	HLA-DRA/PTPRC/HLA-DRB1	3
BP	GO:0046631	alpha-beta T cell activation	4/34	158/18800	0.00018299	0.00355774	0.00212253	HLA-DRA/PTPRC/ITK/HLA-DRB1	4
BP	GO:0002429	immune response-activating cell surface receptor signaling pathway	5/34	300/18800	0.000190513	0.00356683	0.00212795	TRAT1/PTPRC/ITK/HLA-DRB1/BMX	5
BP	GO:0002757	immune response-activating signal transduction	5/34	300/18800	0.000190513	0.00356683	0.00212795	TRAT1/PTPRC/ITK/HLA-DRB1/BMX	5
BP	GO:0048002	antigen processing and presentation of peptide antigen	3/34	63/18800	0.000199268	0.00363123	0.00216638	HLA-DRA/HLA-DRB1/HLA-DMB	3
BP	GO:0002764	immune response-regulating signaling pathway	6/34	482/18800	0.000201136	0.00363123	0.00216638	TRAT1/PTPRC/ITK/HLA-DRB1/BMX/TLR3	6
BP	GO:0043380	regulation of memory T cell differentiation	2/34	12/18800	0.000207164	0.00367444	0.00219215	HLA-DRA/HLA-DRB1	2
BP	GO:0031343	positive regulation of cell killing	3/34	65/18800	0.000218644	0.00381119	0.00227374	HLA-DRA/PTPRC/HLA-DRB1	3
BP	GO:0002440	production of molecular mediator of immune response	5/34	312/18800	0.000228526	0.00391593	0.00233622	HLA-DRA/PTPRC/HLA-DRB1/HLA-DMB/TLR3	5
BP	GO:0043379	memory T cell differentiation	2/34	13/18800	0.000244553	0.00407664	0.0024321	HLA-DRA/HLA-DRB1	2
BP	GO:0006959	humoral immune response	5/34	317/18800	0.000245969	0.00407664	0.0024321	CXCL9/CXCL11/RNASE6/PTPRC/HLA-DRB1	5
BP	GO:0046635	positive regulation of alpha-beta T cell activation	3/34	69/18800	0.000260971	0.0042555	0.00253881	HLA-DRA/PTPRC/HLA-DRB1	3
BP	GO:0090715	immunological memory formation process	2/34	14/18800	0.000284988	0.0045481	0.00271337	HLA-DRA/HLA-DRB1	2
BP	GO:0002768	immune response-regulating cell surface receptor signaling pathway	5/34	328/18800	0.000287911	0.0045481	0.00271337	TRAT1/PTPRC/ITK/HLA-DRB1/BMX	5
BP	GO:0070661	leukocyte proliferation	5/34	330/18800	0.000296088	0.0046053	0.0027475	LST1/CSF1R/PTPRC/HLA-DRB1/HLA-DMB	5
BP	GO:0150076	neuroinflammatory response	3/34	73/18800	0.000308268	0.00465787	0.00277887	PTPRC/CX3CR1/TLR3	3
BP	GO:0032496	response to lipopolysaccharide	5/34	333/18800	0.000308682	0.00465787	0.00277887	CXCL9/CXCL11/MRC1/CX3CR1/LY86	5
BP	GO:0002468	dendritic cell antigen processing and presentation	2/34	15/18800	0.00032846	0.00481265	0.00287121	HLA-DRA/HLA-DRB1	2
BP	GO:0030852	regulation of granulocyte differentiation	2/34	15/18800	0.00032846	0.00481265	0.00287121	EVI2B/HCLS1	2
BP	GO:0001906	cell killing	4/34	185/18800	0.000334173	0.00482641	0.00287941	HLA-DRA/PTPRC/CX3CR1/HLA-DRB1	4
BP	GO:0002819	regulation of adaptive immune response	4/34	188/18800	0.000355207	0.00505795	0.00301755	CD48/HLA-DRA/PTPRC/HLA-DRB1	4
BP	GO:1901741	positive regulation of myoblast fusion	2/34	16/18800	0.000374957	0.00526503	0.00314109	CXCL9/CD53	2
BP	GO:0061844	antimicrobial humoral immune response mediated by antimicrobial peptide	3/34	79/18800	0.000389056	0.00538815	0.00321455	CXCL9/CXCL11/RNASE6	3
BP	GO:0002237	response to molecule of bacterial origin	5/34	354/18800	0.000408628	0.00558274	0.00333063	CXCL9/CXCL11/MRC1/CX3CR1/LY86	5
BP	GO:0090713	immunological memory process	2/34	17/18800	0.00042447	0.00572186	0.00341363	HLA-DRA/HLA-DRB1	2
BP	GO:0018108	peptidyl-tyrosine phosphorylation	5/34	373/18800	0.000518616	0.00679697	0.00405504	CSF1R/PTPRC/ITK/BMX/HCLS1	5
BP	GO:0045637	regulation of myeloid cell differentiation	4/34	208/18800	0.000520449	0.00679697	0.00405504	EVI2B/HLA-DRB1/HCLS1/TLR3	4
BP	GO:0002483	antigen processing and presentation of endogenous peptide antigen	2/34	19/18800	0.0005325	0.00679697	0.00405504	HLA-DRA/HLA-DRB1	2
BP	GO:0002709	regulation of T cell mediated immunity	3/34	88/18800	0.000533922	0.00679697	0.00405504	HLA-DRA/PTPRC/HLA-DRB1	3
BP	GO:0018212	peptidyl-tyrosine modification	5/34	376/18800	0.000537841	0.00679697	0.00405504	CSF1R/PTPRC/ITK/BMX/HCLS1	5
BP	GO:0070098	chemokine-mediated signaling pathway	3/34	89/18800	0.000551866	0.00688811	0.00410942	CXCL9/CXCL11/CX3CR1	3
BP	GO:0007159	leukocyte cell-cell adhesion	5/34	381/18800	0.000571074	0.00701749	0.0041866	HLA-DRA/PTPRC/CX3CR1/HLA-DRB1/HLA-DMB	5
BP	GO:0030098	lymphocyte differentiation	5/34	382/18800	0.000577902	0.00701749	0.0041866	HLA-DRA/PTPRC/ITK/HLA-DRB1/DOCK11	5
BP	GO:0045591	positive regulation of regulatory T cell differentiation	2/34	20/18800	0.000590997	0.00701749	0.0041866	HLA-DRA/HLA-DRB1	2
BP	GO:0046629	gamma-delta T cell activation	2/34	20/18800	0.000590997	0.00701749	0.0041866	PTPRC/ITK	2
BP	GO:0016064	immunoglobulin mediated immune response	4/34	216/18800	0.000599764	0.00701749	0.0041866	HLA-DRA/PTPRC/HLA-DRB1/HLA-DMB	4
BP	GO:0002253	activation of immune response	5/34	386/18800	0.000605833	0.00701749	0.0041866	TRAT1/PTPRC/ITK/HLA-DRB1/BMX	5
BP	GO:0002377	immunoglobulin production	4/34	218/18800	0.000620864	0.00701749	0.0041866	HLA-DRA/PTPRC/HLA-DRB1/HLA-DMB	4
BP	GO:0019724	B cell mediated immunity	4/34	219/18800	0.000631609	0.00701749	0.0041866	HLA-DRA/PTPRC/HLA-DRB1/HLA-DMB	4
BP	GO:0030099	myeloid cell differentiation	5/34	391/18800	0.000642162	0.00701749	0.0041866	CSF1R/EVI2B/HLA-DRB1/HCLS1/TLR3	5
BP	GO:0045582	positive regulation of T cell differentiation	3/34	94/18800	0.000647386	0.00701749	0.0041866	HLA-DRA/PTPRC/HLA-DRB1	3
BP	GO:0007252	I-kappaB phosphorylation	2/34	21/18800	0.000652467	0.00701749	0.0041866	CX3CR1/TLR3	2
BP	GO:0038083	peptidyl-tyrosine autophosphorylation	2/34	21/18800	0.000652467	0.00701749	0.0041866	ITK/BMX	2
BP	GO:1901739	regulation of myoblast fusion	2/34	21/18800	0.000652467	0.00701749	0.0041866	CXCL9/CD53	2
BP	GO:0050727	regulation of inflammatory response	5/34	394/18800	0.000664733	0.00707416	0.00422041	ALOX5AP/PTPRC/HLA-DRB1/VAMP8/TLR3	5
BP	GO:0050870	positive regulation of T cell activation	4/34	223/18800	0.000675917	0.00711825	0.00424671	HLA-DRA/PTPRC/HLA-DRB1/HLA-DMB	4
BP	GO:0046777	protein autophosphorylation	4/34	224/18800	0.000687329	0.00716382	0.0042739	CSF1R/PTPRC/ITK/BMX	4
BP	GO:1990868	response to chemokine	3/34	97/18800	0.000709455	0.00724504	0.00432235	CXCL9/CXCL11/CX3CR1	3
BP	GO:1990869	cellular response to chemokine	3/34	97/18800	0.000709455	0.00724504	0.00432235	CXCL9/CXCL11/CX3CR1	3
BP	GO:0097529	myeloid leukocyte migration	4/34	229/18800	0.000746456	0.00752006	0.00448643	CXCL9/CXCL11/CSF1R/CX3CR1	4
BP	GO:0045639	positive regulation of myeloid cell differentiation	3/34	99/18800	0.00075287	0.00752006	0.00448643	EVI2B/HLA-DRB1/HCLS1	3
BP	GO:0050670	regulation of lymphocyte proliferation	4/34	230/18800	0.0007587	0.00752006	0.00448643	LST1/PTPRC/HLA-DRB1/HLA-DMB	4
BP	GO:0002274	myeloid leukocyte activation	4/34	232/18800	0.000783614	0.00769159	0.00458877	PTPRC/CX3CR1/VAMP8/TLR3	4
BP	GO:0032944	regulation of mononuclear cell proliferation	4/34	233/18800	0.000796287	0.00774083	0.00461814	LST1/PTPRC/HLA-DRB1/HLA-DMB	4
BP	GO:0030595	leukocyte chemotaxis	4/34	236/18800	0.000835174	0.00804154	0.00479754	CXCL9/CXCL11/CSF1R/CX3CR1	4
BP	GO:0060143	positive regulation of syncytium formation by plasma membrane fusion	2/34	24/18800	0.000854617	0.00815112	0.00486292	CXCL9/CD53	2
BP	GO:0016032	viral process	5/34	418/18800	0.000867448	0.00819616	0.00488979	CSF1R/MRC1/APOBEC3G/HLA-DRB1/VAMP8	5
BP	GO:0046634	regulation of alpha-beta T cell activation	3/34	105/18800	0.000893172	0.00829349	0.00494786	HLA-DRA/PTPRC/HLA-DRB1	3
BP	GO:0002696	positive regulation of leukocyte activation	5/34	421/18800	0.000895708	0.00829349	0.00494786	HLA-DRA/PTPRC/HLA-DRB1/VAMP8/HLA-DMB	5
BP	GO:0042116	macrophage activation	3/34	106/18800	0.000918055	0.00829349	0.00494786	PTPRC/CX3CR1/TLR3	3
BP	GO:0001911	negative regulation of leukocyte mediated cytotoxicity	2/34	25/18800	0.00092788	0.00829349	0.00494786	PTPRC/CX3CR1	2
BP	GO:1905523	positive regulation of macrophage migration	2/34	25/18800	0.00092788	0.00829349	0.00494786	CSF1R/CX3CR1	2
BP	GO:0002683	negative regulation of immune system process	5/34	425/18800	0.000934455	0.00829349	0.00494786	LST1/PTPRC/CX3CR1/HLA-DRB1/TLR3	5
BP	GO:0019882	antigen processing and presentation	3/34	107/18800	0.000943374	0.00829349	0.00494786	HLA-DRA/HLA-DRB1/HLA-DMB	3
BP	GO:0045621	positive regulation of lymphocyte differentiation	3/34	107/18800	0.000943374	0.00829349	0.00494786	HLA-DRA/PTPRC/HLA-DRB1	3
BP	GO:1903039	positive regulation of leukocyte cell-cell adhesion	4/34	245/18800	0.000959893	0.00836596	0.0049911	HLA-DRA/PTPRC/HLA-DRB1/HLA-DMB	4
BP	GO:0019883	antigen processing and presentation of endogenous antigen	2/34	26/18800	0.00100407	0.00860263	0.00513229	HLA-DRA/HLA-DRB1	2
BP	GO:0050857	positive regulation of antigen receptor-mediated signaling pathway	2/34	26/18800	0.00100407	0.00860263	0.00513229	TRAT1/PTPRC	2
BP	GO:0002824	positive regulation of adaptive immune response based on somatic recombination of immune receptors built from immunoglobulin superfamily domains	3/34	110/18800	0.00102198	0.00868254	0.00517996	HLA-DRA/PTPRC/HLA-DRB1	3
BP	GO:0046632	alpha-beta T cell differentiation	3/34	111/18800	0.00104908	0.00883846	0.00527298	HLA-DRA/ITK/HLA-DRB1	3
BP	GO:0002456	T cell mediated immunity	3/34	112/18800	0.00107662	0.00899558	0.00536672	HLA-DRA/PTPRC/HLA-DRB1	3
BP	GO:0002821	positive regulation of adaptive immune response	3/34	115/18800	0.001162	0.00957707	0.00571364	HLA-DRA/PTPRC/HLA-DRB1	3
BP	GO:0031342	negative regulation of cell killing	2/34	28/18800	0.00116516	0.00957707	0.00571364	PTPRC/CX3CR1	2
BP	GO:0002708	positive regulation of lymphocyte mediated immunity	3/34	117/18800	0.00122123	0.00995693	0.00594026	HLA-DRA/PTPRC/HLA-DRB1	3
BP	GO:0030217	T cell differentiation	4/34	263/18800	0.00124784	0.0100925	0.00602114	HLA-DRA/PTPRC/ITK/HLA-DRB1	4
BP	GO:0060142	regulation of syncytium formation by plasma membrane fusion	2/34	30/18800	0.00133783	0.0107097	0.00638934	CXCL9/CD53	2
BP	GO:0051209	release of sequestered calcium ion into cytosol	3/34	121/18800	0.00134533	0.0107097	0.00638934	CXCL9/CXCL11/PTPRC	3
BP	GO:0019730	antimicrobial humoral response	3/34	122/18800	0.00137755	0.0107961	0.00644092	CXCL9/CXCL11/RNASE6	3
BP	GO:0051283	negative regulation of sequestering of calcium ion	3/34	122/18800	0.00137755	0.0107961	0.00644092	CXCL9/CXCL11/PTPRC	3
BP	GO:0051282	regulation of sequestering of calcium ion	3/34	124/18800	0.00144343	0.0112255	0.00669707	CXCL9/CXCL11/PTPRC	3
BP	GO:0043372	positive regulation of CD4-positive, alpha-beta T cell differentiation	2/34	32/18800	0.00152198	0.011746	0.0070076	HLA-DRA/HLA-DRB1	2
BP	GO:0051208	sequestering of calcium ion	3/34	128/18800	0.00158109	0.0120186	0.00717026	CXCL9/CXCL11/PTPRC	3
BP	GO:0071621	granulocyte chemotaxis	3/34	128/18800	0.00158109	0.0120186	0.00717026	CXCL9/CXCL11/CSF1R	3
BP	GO:0045589	regulation of regulatory T cell differentiation	2/34	33/18800	0.00161834	0.01221	0.00728444	HLA-DRA/HLA-DRB1	2
BP	GO:0050853	B cell receptor signaling pathway	3/34	131/18800	0.00168955	0.012593	0.00751294	PTPRC/ITK/BMX	3
BP	GO:0019221	cytokine-mediated signaling pathway	5/34	486/18800	0.00169402	0.012593	0.00751294	CXCL9/CXCL11/CSF1R/PTPRC/CX3CR1	5
BP	GO:0022409	positive regulation of cell-cell adhesion	4/34	291/18800	0.00180877	0.0133479	0.0079633	HLA-DRA/PTPRC/HLA-DRB1/HLA-DMB	4
BP	GO:0030224	monocyte differentiation	2/34	36/18800	0.00192443	0.0138006	0.00823337	CSF1R/HLA-DRB1	2
BP	GO:0030851	granulocyte differentiation	2/34	36/18800	0.00192443	0.0138006	0.00823337	EVI2B/HCLS1	2
BP	GO:0045066	regulatory T cell differentiation	2/34	36/18800	0.00192443	0.0138006	0.00823337	HLA-DRA/HLA-DRB1	2
BP	GO:0046651	lymphocyte proliferation	4/34	296/18800	0.00192471	0.0138006	0.00823337	LST1/PTPRC/HLA-DRB1/HLA-DMB	4
BP	GO:0002705	positive regulation of leukocyte mediated immunity	3/34	138/18800	0.00196049	0.0139581	0.00832736	HLA-DRA/PTPRC/HLA-DRB1	3
BP	GO:0032943	mononuclear cell proliferation	4/34	300/18800	0.00202111	0.0142891	0.00852483	LST1/PTPRC/HLA-DRB1/HLA-DMB	4
BP	GO:0045622	regulation of T-helper cell differentiation	2/34	38/18800	0.00214257	0.0150426	0.00897434	HLA-DRA/HLA-DRB1	2
BP	GO:2000516	positive regulation of CD4-positive, alpha-beta T cell activation	2/34	39/18800	0.00225583	0.0156297	0.0093246	HLA-DRA/HLA-DRB1	2
BP	GO:0050729	positive regulation of inflammatory response	3/34	145/18800	0.00225711	0.0156297	0.0093246	ALOX5AP/VAMP8/TLR3	3
BP	GO:0046718	viral entry into host cell	3/34	146/18800	0.00230163	0.0158295	0.00944383	MRC1/HLA-DRB1/VAMP8	3
BP	GO:0051281	positive regulation of release of sequestered calcium ion into cytosol	2/34	40/18800	0.00237187	0.0162024	0.0096663	CXCL9/CXCL11	2
BP	GO:0060326	cell chemotaxis	4/34	315/18800	0.00241253	0.0163696	0.00976602	CXCL9/CXCL11/CSF1R/CX3CR1	4
BP	GO:0019058	viral life cycle	4/34	317/18800	0.0024684	0.016637	0.00992555	MRC1/APOBEC3G/HLA-DRB1/VAMP8	4
BP	GO:1905521	regulation of macrophage migration	2/34	41/18800	0.00249069	0.016676	0.00994885	CSF1R/CX3CR1	2
BP	GO:0045580	regulation of T cell differentiation	3/34	151/18800	0.00253241	0.0168439	0.010049	HLA-DRA/PTPRC/HLA-DRB1	3
BP	GO:2000249	regulation of actin cytoskeleton reorganization	2/34	42/18800	0.00261226	0.0172566	0.0102952	CSF1R/HCLS1	2
BP	GO:0044409	entry into host	3/34	153/18800	0.0026286	0.0172566	0.0102952	MRC1/HLA-DRB1/VAMP8	3
BP	GO:0097530	granulocyte migration	3/34	154/18800	0.00267753	0.0173524	0.0103524	CXCL9/CXCL11/CSF1R	3
BP	GO:0097553	calcium ion transmembrane import into cytosol	3/34	154/18800	0.00267753	0.0173524	0.0103524	CXCL9/CXCL11/PTPRC	3
BP	GO:0007204	positive regulation of cytosolic calcium ion concentration	4/34	325/18800	0.00270081	0.0173918	0.0103759	CXCL9/CXCL11/PTPRC/CX3CR1	4
BP	GO:0070665	positive regulation of leukocyte proliferation	3/34	158/18800	0.00287888	0.0184212	0.01099	CSF1R/PTPRC/HLA-DMB	3
BP	GO:0007520	myoblast fusion	2/34	45/18800	0.00299348	0.019034	0.0113556	CXCL9/CD53	2
BP	GO:0050863	regulation of T cell activation	4/34	342/18800	0.00324394	0.0204977	0.0122288	HLA-DRA/PTPRC/HLA-DRB1/HLA-DMB	4
BP	GO:1903037	regulation of leukocyte cell-cell adhesion	4/34	344/18800	0.00331239	0.0208002	0.0124093	HLA-DRA/PTPRC/HLA-DRB1/HLA-DMB	4
BP	GO:0060402	calcium ion transport into cytosol	3/34	171/18800	0.00359695	0.0224476	0.0133922	CXCL9/CXCL11/PTPRC	3
BP	GO:0043370	regulation of CD4-positive, alpha-beta T cell differentiation	2/34	50/18800	0.00368318	0.0226334	0.013503	HLA-DRA/HLA-DRB1	2
BP	GO:0046638	positive regulation of alpha-beta T cell differentiation	2/34	50/18800	0.00368318	0.0226334	0.013503	HLA-DRA/HLA-DRB1	2
BP	GO:0002822	regulation of adaptive immune response based on somatic recombination of immune receptors built from immunoglobulin superfamily domains	3/34	173/18800	0.00371626	0.0226334	0.013503	HLA-DRA/PTPRC/HLA-DRB1	3
BP	GO:0007259	receptor signaling pathway via JAK-STAT	3/34	173/18800	0.00371626	0.0226334	0.013503	CSF1R/PTPRC/HCLS1	3
BP	GO:0051480	regulation of cytosolic calcium ion concentration	4/34	356/18800	0.00374401	0.0226658	0.0135223	CXCL9/CXCL11/PTPRC/CX3CR1	4
BP	GO:0042129	regulation of T cell proliferation	3/34	174/18800	0.00377682	0.0227283	0.0135596	PTPRC/HLA-DRB1/HLA-DMB	3
BP	GO:0002706	regulation of lymphocyte mediated immunity	3/34	175/18800	0.00383797	0.0229597	0.0136977	HLA-DRA/PTPRC/HLA-DRB1	3
BP	GO:0052126	movement in host environment	3/34	177/18800	0.0039621	0.0235628	0.0140575	MRC1/HLA-DRB1/VAMP8	3
BP	GO:0002449	lymphocyte mediated immunity	4/34	365/18800	0.00409185	0.0241921	0.0144329	HLA-DRA/PTPRC/HLA-DRB1/HLA-DMB	4
BP	GO:0002931	response to ischemia	2/34	53/18800	0.00412918	0.0242709	0.0144799	CSF1R/CX3CR1	2
BP	GO:0045619	regulation of lymphocyte differentiation	3/34	181/18800	0.00421766	0.0245284	0.0146335	HLA-DRA/PTPRC/HLA-DRB1	3
BP	GO:0032640	tumor necrosis factor production	3/34	182/18800	0.00428309	0.0245284	0.0146335	PTPRC/CX3CR1/TLR3	3
BP	GO:0032680	regulation of tumor necrosis factor production	3/34	182/18800	0.00428309	0.0245284	0.0146335	PTPRC/CX3CR1/TLR3	3
BP	GO:0010524	positive regulation of calcium ion transport into cytosol	2/34	54/18800	0.00428315	0.0245284	0.0146335	CXCL9/CXCL11	2
BP	GO:0002460	adaptive immune response based on somatic recombination of immune receptors built from immunoglobulin superfamily domains	4/34	370/18800	0.00429428	0.0245284	0.0146335	HLA-DRA/PTPRC/HLA-DRB1/HLA-DMB	4
BP	GO:0051251	positive regulation of lymphocyte activation	4/34	371/18800	0.00433557	0.0246251	0.0146912	HLA-DRA/PTPRC/HLA-DRB1/HLA-DMB	4
BP	GO:0097696	receptor signaling pathway via STAT	3/34	184/18800	0.00441579	0.0249367	0.0148771	CSF1R/PTPRC/HCLS1	3
BP	GO:1905517	macrophage migration	2/34	55/18800	0.00443976	0.0249367	0.0148771	CSF1R/CX3CR1	2
BP	GO:0071706	tumor necrosis factor superfamily cytokine production	3/34	187/18800	0.00461949	0.025661	0.0153092	PTPRC/CX3CR1/TLR3	3
BP	GO:1903555	regulation of tumor necrosis factor superfamily cytokine production	3/34	187/18800	0.00461949	0.025661	0.0153092	PTPRC/CX3CR1/TLR3	3
BP	GO:0050731	positive regulation of peptidyl-tyrosine phosphorylation	3/34	190/18800	0.00482883	0.0265323	0.0158291	CSF1R/PTPRC/HCLS1	3
BP	GO:0060401	cytosolic calcium ion transport	3/34	190/18800	0.00482883	0.0265323	0.0158291	CXCL9/CXCL11/PTPRC	3
BP	GO:0050900	leukocyte migration	4/34	384/18800	0.00489708	0.0266331	0.0158892	CXCL9/CXCL11/CSF1R/CX3CR1	4
BP	GO:0051701	biological process involved in interaction with host	3/34	191/18800	0.00489986	0.0266331	0.0158892	MRC1/HLA-DRB1/VAMP8	3
BP	GO:0002695	negative regulation of leukocyte activation	3/34	193/18800	0.00504384	0.0270969	0.0161659	LST1/PTPRC/HLA-DRB1	3
BP	GO:0000768	syncytium formation by plasma membrane fusion	2/34	59/18800	0.00509239	0.0270969	0.0161659	CXCL9/CD53	2
BP	GO:0002886	regulation of myeloid leukocyte mediated immunity	2/34	59/18800	0.00509239	0.0270969	0.0161659	CX3CR1/VAMP8	2
BP	GO:0140253	cell-cell fusion	2/34	59/18800	0.00509239	0.0270969	0.0161659	CXCL9/CD53	2
BP	GO:0071674	mononuclear cell migration	3/34	199/18800	0.00549105	0.0290652	0.0173402	CXCL11/CSF1R/CX3CR1	3
BP	GO:0019722	calcium-mediated signaling	3/34	202/18800	0.00572334	0.030137	0.0179796	TRAT1/PTPRC/CX3CR1	3
BP	GO:0006949	syncytium formation	2/34	63/18800	0.00578647	0.0303115	0.0180837	CXCL9/CD53	2
BP	GO:0042098	T cell proliferation	3/34	204/18800	0.00588145	0.0306502	0.0182858	PTPRC/HLA-DRB1/HLA-DMB	3
BP	GO:0042093	T-helper cell differentiation	2/34	65/18800	0.00614886	0.0318795	0.0190192	HLA-DRA/HLA-DRB1	2
BP	GO:0050854	regulation of antigen receptor-mediated signaling pathway	2/34	66/18800	0.00633386	0.0325053	0.0193925	TRAT1/PTPRC	2
BP	GO:2000514	regulation of CD4-positive, alpha-beta T cell activation	2/34	66/18800	0.00633386	0.0325053	0.0193925	HLA-DRA/HLA-DRB1	2
BP	GO:0002294	CD4-positive, alpha-beta T cell differentiation involved in immune response	2/34	67/18800	0.00652139	0.0326392	0.0194724	HLA-DRA/HLA-DRB1	2
BP	GO:0002704	negative regulation of leukocyte mediated immunity	2/34	67/18800	0.00652139	0.0326392	0.0194724	PTPRC/CX3CR1	2
BP	GO:0042531	positive regulation of tyrosine phosphorylation of STAT protein	2/34	67/18800	0.00652139	0.0326392	0.0194724	CSF1R/HCLS1	2
BP	GO:0046637	regulation of alpha-beta T cell differentiation	2/34	67/18800	0.00652139	0.0326392	0.0194724	HLA-DRA/HLA-DRB1	2
BP	GO:0051851	modulation by host of symbiont process	2/34	67/18800	0.00652139	0.0326392	0.0194724	CSF1R/CX3CR1	2
BP	GO:0002287	alpha-beta T cell activation involved in immune response	2/34	68/18800	0.00671144	0.0332611	0.0198434	HLA-DRA/HLA-DRB1	2
BP	GO:0002293	alpha-beta T cell differentiation involved in immune response	2/34	68/18800	0.00671144	0.0332611	0.0198434	HLA-DRA/HLA-DRB1	2
BP	GO:0050866	negative regulation of cell activation	3/34	216/18800	0.00688527	0.0339561	0.0202581	LST1/PTPRC/HLA-DRB1	3
BP	GO:0032722	positive regulation of chemokine production	2/34	70/18800	0.00709904	0.0348404	0.0207856	CSF1R/TLR3	2
BP	GO:0051651	maintenance of location in cell	3/34	219/18800	0.00715119	0.0349268	0.0208372	CXCL9/CXCL11/PTPRC	3
BP	GO:0070374	positive regulation of ERK1 and ERK2 cascade	3/34	220/18800	0.00724117	0.0351963	0.0209979	CSF1R/PTPRC/HLA-DRB1	3
BP	GO:1904427	positive regulation of calcium ion transmembrane transport	2/34	71/18800	0.00729658	0.0352959	0.0210574	CXCL9/CXCL11	2
BP	GO:0045785	positive regulation of cell adhesion	4/34	446/18800	0.00825456	0.0397398	0.0237086	HLA-DRA/PTPRC/HLA-DRB1/HLA-DMB	4
BP	GO:0002292	T cell differentiation involved in immune response	2/34	76/18800	0.00832128	0.0398711	0.0237869	HLA-DRA/HLA-DRB1	2
BP	GO:0006874	cellular calcium ion homeostasis	4/34	456/18800	0.008909	0.0422864	0.0252279	CXCL9/CXCL11/PTPRC/CX3CR1	4
BP	GO:0022407	regulation of cell-cell adhesion	4/34	456/18800	0.008909	0.0422864	0.0252279	HLA-DRA/PTPRC/HLA-DRB1/HLA-DMB	4
BP	GO:0051279	regulation of release of sequestered calcium ion into cytosol	2/34	80/18800	0.00918492	0.0433923	0.0258876	CXCL9/CXCL11	2
BP	GO:0043367	CD4-positive, alpha-beta T cell differentiation	2/34	82/18800	0.00963116	0.0452889	0.0270191	HLA-DRA/HLA-DRB1	2
BP	GO:0055074	calcium ion homeostasis	4/34	468/18800	0.00973836	0.0455809	0.0271934	CXCL9/CXCL11/PTPRC/CX3CR1	4
BP	GO:0042509	regulation of tyrosine phosphorylation of STAT protein	2/34	83/18800	0.00985786	0.0459277	0.0274002	CSF1R/HCLS1	2
BP	GO:0050672	negative regulation of lymphocyte proliferation	2/34	84/18800	0.0100869	0.0467793	0.0279083	LST1/HLA-DRB1	2
BP	GO:0001819	positive regulation of cytokine production	4/34	475/18800	0.0102448	0.0472035	0.0281614	CSF1R/PTPRC/ITK/TLR3	4
BP	GO:0032945	negative regulation of mononuclear cell proliferation	2/34	85/18800	0.0103184	0.0472035	0.0281614	LST1/HLA-DRB1	2
BP	GO:0033674	positive regulation of kinase activity	4/34	476/18800	0.0103185	0.0472035	0.0281614	CSF1R/PTPRC/HLA-DRB1/TLR3	4
BP	GO:0002312	B cell activation involved in immune response	2/34	86/18800	0.0105522	0.0480551	0.0286695	PTPRC/DOCK11	2
BP	GO:0007260	tyrosine phosphorylation of STAT protein	2/34	87/18800	0.0107883	0.0486918	0.0290493	CSF1R/HCLS1	2
BP	GO:0050829	defense response to Gram-negative bacterium	2/34	87/18800	0.0107883	0.0486918	0.0290493	RNASE6/MPEG1	2
BP	GO:0043410	positive regulation of MAPK cascade	4/34	491/18800	0.0114661	0.0513238	0.0306195	CSF1R/PTPRC/HLA-DRB1/TLR3	4
BP	GO:0061097	regulation of protein tyrosine kinase activity	2/34	90/18800	0.0115107	0.0513238	0.0306195	CSF1R/PTPRC	2
BP	GO:0050730	regulation of peptidyl-tyrosine phosphorylation	3/34	261/18800	0.0115237	0.0513238	0.0306195	CSF1R/PTPRC/HCLS1	3
BP	GO:0072503	cellular divalent inorganic cation homeostasis	4/34	494/18800	0.0117052	0.0519015	0.0309642	CXCL9/CXCL11/PTPRC/CX3CR1	4
BP	GO:0070664	negative regulation of leukocyte proliferation	2/34	91/18800	0.0117561	0.0519015	0.0309642	LST1/HLA-DRB1	2
BP	GO:0051091	positive regulation of DNA-binding transcription factor activity	3/34	265/18800	0.0120049	0.0527696	0.0314821	CX3CR1/HCLS1/TLR3	3
BP	GO:0002275	myeloid cell activation involved in immune response	2/34	93/18800	0.0122539	0.0536307	0.0319958	CX3CR1/VAMP8	2
BP	GO:0002690	positive regulation of leukocyte chemotaxis	2/34	94/18800	0.0125062	0.0544991	0.0325139	CSF1R/CX3CR1	2
BP	GO:0043270	positive regulation of ion transport	3/34	273/18800	0.0130019	0.056243	0.0335543	CXCL9/CXCL11/VAMP8	3
BP	GO:0030316	osteoclast differentiation	2/34	96/18800	0.0130177	0.056243	0.0335543	CSF1R/TLR3	2
BP	GO:0002532	production of molecular mediator involved in inflammatory response	2/34	97/18800	0.0132768	0.0568764	0.0339322	ALOX5AP/VAMP8	2
BP	GO:0032642	regulation of chemokine production	2/34	97/18800	0.0132768	0.0568764	0.0339322	CSF1R/TLR3	2
BP	GO:0032602	chemokine production	2/34	98/18800	0.0135382	0.0577514	0.0344542	CSF1R/TLR3	2
BP	GO:0048872	homeostasis of number of cells	3/34	282/18800	0.0141789	0.0602304	0.0359332	CX3CR1/DOCK11/HCLS1	3
BP	GO:0051702	biological process involved in interaction with symbiont	2/34	101/18800	0.0143357	0.0606418	0.0361786	CSF1R/CX3CR1	2
BP	GO:0032677	regulation of interleukin-8 production	2/34	102/18800	0.014606	0.0612724	0.0365548	PTPRC/TLR3	2
BP	GO:0035710	CD4-positive, alpha-beta T cell activation	2/34	102/18800	0.014606	0.0612724	0.0365548	HLA-DRA/HLA-DRB1	2
BP	GO:0010522	regulation of calcium ion transport into cytosol	2/34	103/18800	0.0148785	0.0613965	0.0366289	CXCL9/CXCL11	2
BP	GO:0032637	interleukin-8 production	2/34	103/18800	0.0148785	0.0613965	0.0366289	PTPRC/TLR3	2
BP	GO:0032760	positive regulation of tumor necrosis factor production	2/34	103/18800	0.0148785	0.0613965	0.0366289	PTPRC/TLR3	2
BP	GO:0042102	positive regulation of T cell proliferation	2/34	103/18800	0.0148785	0.0613965	0.0366289	PTPRC/HLA-DMB	2
BP	GO:0007249	I-kappaB kinase/NF-kappaB signaling	3/34	288/18800	0.0149963	0.0615256	0.0367059	CX3CR1/HLA-DRB1/TLR3	3
BP	GO:0031349	positive regulation of defense response	3/34	289/18800	0.0151351	0.0615256	0.0367059	ALOX5AP/VAMP8/TLR3	3
BP	GO:0002444	myeloid leukocyte mediated immunity	2/34	104/18800	0.0151532	0.0615256	0.0367059	CX3CR1/VAMP8	2
BP	GO:0050830	defense response to Gram-positive bacterium	2/34	104/18800	0.0151532	0.0615256	0.0367059	RNASE6/MPEG1	2
BP	GO:0030593	neutrophil chemotaxis	2/34	106/18800	0.0157092	0.0635278	0.0379004	CXCL9/CXCL11	2
BP	GO:1903557	positive regulation of tumor necrosis factor superfamily cytokine production	2/34	107/18800	0.0159904	0.0644076	0.0384253	PTPRC/TLR3	2
BP	GO:0031532	actin cytoskeleton reorganization	2/34	111/18800	0.017137	0.0685544	0.0408993	CSF1R/HCLS1	2
BP	GO:0019932	second-messenger-mediated signaling	3/34	303/18800	0.0171556	0.0685544	0.0408993	TRAT1/PTPRC/CX3CR1	3
BP	GO:0002698	negative regulation of immune effector process	2/34	112/18800	0.017429	0.069373	0.0413876	PTPRC/CX3CR1	2
BP	GO:0001865	NK T cell differentiation	1/34	10/18800	0.0179429	0.0695029	0.0414651	ITK	1
BP	GO:0001915	negative regulation of T cell mediated cytotoxicity	1/34	10/18800	0.0179429	0.0695029	0.0414651	PTPRC	1
BP	GO:0002291	T cell activation via T cell receptor contact with antigen bound to MHC molecule on antigen presenting cell	1/34	10/18800	0.0179429	0.0695029	0.0414651	HLA-DMB	1
BP	GO:0032070	regulation of deoxyribonuclease activity	1/34	10/18800	0.0179429	0.0695029	0.0414651	GZMA	1
BP	GO:0045657	positive regulation of monocyte differentiation	1/34	10/18800	0.0179429	0.0695029	0.0414651	HLA-DRB1	1
BP	GO:0048304	positive regulation of isotype switching to IgG isotypes	1/34	10/18800	0.0179429	0.0695029	0.0414651	PTPRC	1
BP	GO:0060368	regulation of Fc receptor mediated stimulatory signaling pathway	1/34	10/18800	0.0179429	0.0695029	0.0414651	PTPRC	1
BP	GO:0070372	regulation of ERK1 and ERK2 cascade	3/34	311/18800	0.0183751	0.0709053	0.0423018	CSF1R/PTPRC/HLA-DRB1	3
BP	GO:0071675	regulation of mononuclear cell migration	2/34	116/18800	0.0186182	0.0715705	0.0426986	CSF1R/CX3CR1	2
BP	GO:0070588	calcium ion transmembrane transport	3/34	314/18800	0.0188446	0.0717152	0.0427849	CXCL9/CXCL11/PTPRC	3
BP	GO:0032609	interferon-gamma production	2/34	117/18800	0.0189208	0.0717152	0.0427849	HLA-DRB1/TLR3	2
BP	GO:0032649	regulation of interferon-gamma production	2/34	117/18800	0.0189208	0.0717152	0.0427849	HLA-DRB1/TLR3	2
BP	GO:0071346	cellular response to interferon-gamma	2/34	118/18800	0.0192254	0.0717152	0.0427849	MRC1/TLR3	2
BP	GO:0051897	positive regulation of protein kinase B signaling	2/34	119/18800	0.0195321	0.0717152	0.0427849	CX3CR1/HCLS1	2
BP	GO:0051928	positive regulation of calcium ion transport	2/34	119/18800	0.0195321	0.0717152	0.0427849	CXCL9/CXCL11	2
BP	GO:0019372	lipoxygenase pathway	1/34	11/18800	0.0197199	0.0717152	0.0427849	ALOX5AP	1
BP	GO:0045060	negative thymic T cell selection	1/34	11/18800	0.0197199	0.0717152	0.0427849	PTPRC	1
BP	GO:0046598	positive regulation of viral entry into host cell	1/34	11/18800	0.0197199	0.0717152	0.0427849	HLA-DRB1	1
BP	GO:0046643	regulation of gamma-delta T cell activation	1/34	11/18800	0.0197199	0.0717152	0.0427849	PTPRC	1
BP	GO:0051673	membrane disruption in another organism	1/34	11/18800	0.0197199	0.0717152	0.0427849	MPEG1	1
BP	GO:0071803	positive regulation of podosome assembly	1/34	11/18800	0.0197199	0.0717152	0.0427849	LCP1	1
BP	GO:0075294	positive regulation by symbiont of entry into host	1/34	11/18800	0.0197199	0.0717152	0.0427849	HLA-DRB1	1
BP	GO:0098883	synapse pruning	1/34	11/18800	0.0197199	0.0717152	0.0427849	CX3CR1	1
BP	GO:1903977	positive regulation of glial cell migration	1/34	11/18800	0.0197199	0.0717152	0.0427849	CX3CR1	1
BP	GO:0014902	myotube differentiation	2/34	122/18800	0.0204647	0.0729202	0.0435038	CXCL9/CD53	2
BP	GO:0046887	positive regulation of hormone secretion	2/34	122/18800	0.0204647	0.0729202	0.0435038	HLA-DRB1/VAMP8	2
BP	GO:0002244	hematopoietic progenitor cell differentiation	2/34	123/18800	0.0207796	0.0729202	0.0435038	CSF1R/PTPRC	2
BP	GO:0022612	gland morphogenesis	2/34	123/18800	0.0207796	0.0729202	0.0435038	CSF1R/RPS6KA1	2
BP	GO:0002688	regulation of leukocyte chemotaxis	2/34	124/18800	0.0210966	0.0729202	0.0435038	CSF1R/CX3CR1	2
BP	GO:0002424	T cell mediated immune response to tumor cell	1/34	12/18800	0.0214938	0.0729202	0.0435038	HLA-DRB1	1
BP	GO:0002887	negative regulation of myeloid leukocyte mediated immunity	1/34	12/18800	0.0214938	0.0729202	0.0435038	CX3CR1	1
BP	GO:0006216	cytidine catabolic process	1/34	12/18800	0.0214938	0.0729202	0.0435038	APOBEC3G	1
BP	GO:0009972	cytidine deamination	1/34	12/18800	0.0214938	0.0729202	0.0435038	APOBEC3G	1
BP	GO:0016554	cytidine to uridine editing	1/34	12/18800	0.0214938	0.0729202	0.0435038	APOBEC3G	1
BP	GO:0031953	negative regulation of protein autophosphorylation	1/34	12/18800	0.0214938	0.0729202	0.0435038	PTPRC	1
BP	GO:0043383	negative T cell selection	1/34	12/18800	0.0214938	0.0729202	0.0435038	PTPRC	1
BP	GO:0046087	cytidine metabolic process	1/34	12/18800	0.0214938	0.0729202	0.0435038	APOBEC3G	1
BP	GO:0051608	histamine transport	1/34	12/18800	0.0214938	0.0729202	0.0435038	VAMP8	1
BP	GO:0051639	actin filament network formation	1/34	12/18800	0.0214938	0.0729202	0.0435038	LCP1	1
BP	GO:0061517	macrophage proliferation	1/34	12/18800	0.0214938	0.0729202	0.0435038	CSF1R	1
BP	GO:0070254	mucus secretion	1/34	12/18800	0.0214938	0.0729202	0.0435038	VAMP8	1
BP	GO:0072537	fibroblast activation	1/34	12/18800	0.0214938	0.0729202	0.0435038	RPS6KA1	1
BP	GO:1900272	negative regulation of long-term synaptic potentiation	1/34	12/18800	0.0214938	0.0729202	0.0435038	CX3CR1	1
BP	GO:2000035	regulation of stem cell division	1/34	12/18800	0.0214938	0.0729202	0.0435038	EVI2B	1
BP	GO:0051235	maintenance of location	3/34	331/18800	0.0216318	0.073143	0.0436368	CXCL9/CXCL11/PTPRC	3
BP	GO:0070371	ERK1 and ERK2 cascade	3/34	335/18800	0.0223189	0.0751861	0.0448557	CSF1R/PTPRC/HLA-DRB1	3
BP	GO:1990266	neutrophil migration	2/34	128/18800	0.0223848	0.0751861	0.0448557	CXCL9/CXCL11	2
BP	GO:0036005	response to macrophage colony-stimulating factor	1/34	13/18800	0.0232646	0.0771163	0.0460072	CSF1R	1
BP	GO:0036006	cellular response to macrophage colony-stimulating factor stimulus	1/34	13/18800	0.0232646	0.0771163	0.0460072	CSF1R	1
BP	GO:0042492	gamma-delta T cell differentiation	1/34	13/18800	0.0232646	0.0771163	0.0460072	PTPRC	1
BP	GO:0045006	DNA deamination	1/34	13/18800	0.0232646	0.0771163	0.0460072	APOBEC3G	1
BP	GO:0002756	MyD88-independent toll-like receptor signaling pathway	1/34	14/18800	0.0250322	0.0805973	0.048084	TLR3	1
BP	GO:0035589	G protein-coupled purinergic nucleotide receptor signaling pathway	1/34	14/18800	0.0250322	0.0805973	0.048084	GPR34	1
BP	GO:0044794	positive regulation by host of viral process	1/34	14/18800	0.0250322	0.0805973	0.048084	CSF1R	1
BP	GO:0045059	positive thymic T cell selection	1/34	14/18800	0.0250322	0.0805973	0.048084	PTPRC	1
BP	GO:0046131	pyrimidine ribonucleoside metabolic process	1/34	14/18800	0.0250322	0.0805973	0.048084	APOBEC3G	1
BP	GO:0046133	pyrimidine ribonucleoside catabolic process	1/34	14/18800	0.0250322	0.0805973	0.048084	APOBEC3G	1
BP	GO:0048302	regulation of isotype switching to IgG isotypes	1/34	14/18800	0.0250322	0.0805973	0.048084	PTPRC	1
BP	GO:0051764	actin crosslink formation	1/34	14/18800	0.0250322	0.0805973	0.048084	LCP1	1
BP	GO:0071801	regulation of podosome assembly	1/34	14/18800	0.0250322	0.0805973	0.048084	LCP1	1
BP	GO:0002831	regulation of response to biotic stimulus	3/34	351/18800	0.0251869	0.0808378	0.0482275	APOBEC3G/HLA-DRB1/LY86	3
BP	GO:1903900	regulation of viral life cycle	2/34	139/18800	0.0260906	0.0825961	0.0492765	APOBEC3G/HLA-DRB1	2
BP	GO:0034341	response to interferon-gamma	2/34	140/18800	0.0264391	0.0825961	0.0492765	MRC1/TLR3	2
BP	GO:0050921	positive regulation of chemotaxis	2/34	140/18800	0.0264391	0.0825961	0.0492765	CSF1R/CX3CR1	2
BP	GO:0002687	positive regulation of leukocyte migration	2/34	141/18800	0.0267895	0.0825961	0.0492765	CSF1R/CX3CR1	2
BP	GO:0050671	positive regulation of lymphocyte proliferation	2/34	141/18800	0.0267895	0.0825961	0.0492765	PTPRC/HLA-DMB	2
BP	GO:0002730	regulation of dendritic cell cytokine production	1/34	15/18800	0.0267968	0.0825961	0.0492765	TLR3	1
BP	GO:0002836	positive regulation of response to tumor cell	1/34	15/18800	0.0267968	0.0825961	0.0492765	HLA-DRB1	1
BP	GO:0002839	positive regulation of immune response to tumor cell	1/34	15/18800	0.0267968	0.0825961	0.0492765	HLA-DRB1	1
BP	GO:0033008	positive regulation of mast cell activation involved in immune response	1/34	15/18800	0.0267968	0.0825961	0.0492765	VAMP8	1
BP	GO:0035493	SNARE complex assembly	1/34	15/18800	0.0267968	0.0825961	0.0492765	VAMP8	1
BP	GO:0043306	positive regulation of mast cell degranulation	1/34	15/18800	0.0267968	0.0825961	0.0492765	VAMP8	1
BP	GO:0048291	isotype switching to IgG isotypes	1/34	15/18800	0.0267968	0.0825961	0.0492765	PTPRC	1
BP	GO:0070207	protein homotrimerization	1/34	15/18800	0.0267968	0.0825961	0.0492765	ALOX5AP	1
BP	GO:0030183	B cell differentiation	2/34	142/18800	0.0271419	0.0834055	0.0497594	PTPRC/DOCK11	2
CC	GO:0001772	immunological synapse	4/35	44/19594	1.10051e-06	0.000103448	5.79215e-05	HLA-DRA/GZMA/CD53/HLA-DRB1	4
CC	GO:0042613	MHC class II protein complex	3/35	17/19594	3.48992e-06	0.000164026	9.18401e-05	HLA-DRA/HLA-DRB1/HLA-DMB	3
CC	GO:0042611	MHC protein complex	3/35	25/19594	1.1689e-05	0.000366257	0.000205071	HLA-DRA/HLA-DRB1/HLA-DMB	3
CC	GO:0009897	external side of plasma membrane	6/35	455/19594	0.000139029	0.00284147	0.00159097	CXCL9/CD48/PTPRC/CX3CR1/HLA-DRB1/CLEC2B	6
CC	GO:0031902	late endosome membrane	4/35	152/19594	0.000151142	0.00284147	0.00159097	HLA-DRA/HLA-DRB1/VAMP8/HLA-DMB	4
CC	GO:0030669	clathrin-coated endocytic vesicle membrane	3/35	72/19594	0.000286164	0.00445987	0.00249713	HLA-DRA/HLA-DRB1/VAMP8	3
CC	GO:0030139	endocytic vesicle	5/35	342/19594	0.000332118	0.00445987	0.00249713	HLA-DRA/NCF4/MPEG1/HLA-DRB1/VAMP8	5
CC	GO:0045334	clathrin-coated endocytic vesicle	3/35	91/19594	0.000569533	0.00666374	0.0037311	HLA-DRA/HLA-DRB1/VAMP8	3
CC	GO:0005765	lysosomal membrane	5/35	404/19594	0.000708908	0.00666374	0.0037311	HLA-DRA/HLA-DRB1/VAMP8/HLA-DMB/TLR3	5
CC	GO:0098852	lytic vacuole membrane	5/35	404/19594	0.000708908	0.00666374	0.0037311	HLA-DRA/HLA-DRB1/VAMP8/HLA-DMB/TLR3	5
CC	GO:0030665	clathrin-coated vesicle membrane	3/35	111/19594	0.00101481	0.0081977	0.00458998	HLA-DRA/HLA-DRB1/VAMP8	3
CC	GO:0005774	vacuolar membrane	5/35	449/19594	0.00113762	0.0081977	0.00458998	HLA-DRA/HLA-DRB1/VAMP8/HLA-DMB/TLR3	5
CC	GO:0071556	integral component of lumenal side of endoplasmic reticulum membrane	2/35	29/19594	0.00122093	0.0081977	0.00458998	HLA-DRA/HLA-DRB1	2
CC	GO:0098553	lumenal side of endoplasmic reticulum membrane	2/35	29/19594	0.00122093	0.0081977	0.00458998	HLA-DRA/HLA-DRB1	2
CC	GO:0005770	late endosome	4/35	283/19594	0.00156789	0.00982542	0.00550136	HLA-DRA/HLA-DRB1/VAMP8/HLA-DMB	4
CC	GO:0098576	lumenal side of membrane	2/35	35/19594	0.00177731	0.0104417	0.00584643	HLA-DRA/HLA-DRB1	2
CC	GO:0045335	phagocytic vesicle	3/35	138/19594	0.00189706	0.0104896	0.00587326	NCF4/MPEG1/VAMP8	3
CC	GO:0030662	coated vesicle membrane	3/35	176/19594	0.00377528	0.0197154	0.0110388	HLA-DRA/HLA-DRB1/VAMP8	3
CC	GO:0030136	clathrin-coated vesicle	3/35	192/19594	0.0048138	0.0221775	0.0124174	HLA-DRA/HLA-DRB1/VAMP8	3
CC	GO:0005769	early endosome	4/35	389/19594	0.00492553	0.0221775	0.0124174	HLA-DRA/CYTIP/VAMP8/TLR3	4
CC	GO:0030666	endocytic vesicle membrane	3/35	194/19594	0.00495455	0.0221775	0.0124174	HLA-DRA/HLA-DRB1/VAMP8	3
CC	GO:0012507	ER to Golgi transport vesicle membrane	2/35	62/19594	0.00548059	0.023417	0.0131114	HLA-DRA/HLA-DRB1	2
CC	GO:0070821	tertiary granule membrane	2/35	73/19594	0.00752367	0.0307489	0.0172166	CD53/VAMP8	2
CC	GO:0035579	specific granule membrane	2/35	91/19594	0.0114907	0.0450054	0.025199	CD53/VAMP8	2
CC	GO:0030134	COPII-coated ER to Golgi transport vesicle	2/35	94/19594	0.0122243	0.0459635	0.0257354	HLA-DRA/HLA-DRB1	2
CC	GO:0032587	ruffle membrane	2/35	97/19594	0.012978	0.0469204	0.0262712	LCP1/BMX	2
CC	GO:0032588	trans-Golgi network membrane	2/35	100/19594	0.0137515	0.0478757	0.0268061	HLA-DRA/HLA-DRB1	2
CC	GO:0030135	coated vesicle	3/35	290/19594	0.0148074	0.0497105	0.0278334	HLA-DRA/HLA-DRB1/VAMP8	3
CC	GO:0005884	actin filament	2/35	113/19594	0.0173276	0.0561653	0.0314475	LCP1/HCLS1	2
CC	GO:0030667	secretory granule membrane	3/35	312/19594	0.0179687	0.0563019	0.031524	CD53/PTPRC/VAMP8	3
CC	GO:0043020	NADPH oxidase complex	1/35	14/19594	0.0247275	0.0749801	0.0419821	NCF4	1
CC	GO:0005767	secondary lysosome	1/35	17/19594	0.0299484	0.0879734	0.0492572	NCF4	1
MF	GO:0030246	carbohydrate binding	6/32	270/18410	6.19193e-06	0.000848294	0.000573568	KLRB1/HLA-DRA/MRC1/HLA-DRB1/KLRF1/CLEC2B	6
MF	GO:0023026	MHC class II protein complex binding	3/32	27/18410	1.35628e-05	0.000929053	0.000628173	HLA-DRA/HLA-DRB1/HLA-DMB	3
MF	GO:0023023	MHC protein complex binding	3/32	36/18410	3.27571e-05	0.00149591	0.00101145	HLA-DRA/HLA-DRB1/HLA-DMB	3
MF	GO:0140375	immune receptor activity	4/32	148/18410	0.000121039	0.00298149	0.00201592	HLA-DRA/CX3CR1/HLA-DRB1/KLRF1	4
MF	GO:0032395	MHC class II receptor activity	2/32	10/18410	0.000130576	0.00298149	0.00201592	HLA-DRA/HLA-DRB1	2
MF	GO:0042608	T cell receptor binding	2/32	10/18410	0.000130576	0.00298149	0.00201592	HLA-DRA/HLA-DRB1	2
MF	GO:0042379	chemokine receptor binding	3/32	71/18410	0.000251607	0.00492431	0.00332954	CXCL9/CXCL11/CX3CR1	3
MF	GO:0045236	CXCR chemokine receptor binding	2/32	18/18410	0.00044012	0.00753705	0.00509612	CXCL9/CXCL11	2
MF	GO:0030247	polysaccharide binding	2/32	25/18410	0.00085645	0.0130371	0.00881492	HLA-DRA/HLA-DRB1	2
MF	GO:0004713	protein tyrosine kinase activity	3/32	135/18410	0.00163707	0.0224278	0.0151644	CSF1R/ITK/BMX	3
MF	GO:0042605	peptide antigen binding	2/32	37/18410	0.00187674	0.023374	0.0158042	HLA-DRA/HLA-DRB1	2
MF	GO:0004715	non-membrane spanning protein tyrosine kinase activity	2/32	45/18410	0.00276569	0.0315749	0.0213492	ITK/BMX	2
MF	GO:0008009	chemokine activity	2/32	49/18410	0.00327111	0.0329293	0.0222649	CXCL9/CXCL11	2
MF	GO:0003823	antigen binding	3/32	174/18410	0.00336504	0.0329293	0.0222649	CD48/HLA-DRA/HLA-DRB1	3
MF	GO:0004712	protein serine/threonine/tyrosine kinase activity	4/32	446/18410	0.0071437	0.0652458	0.0441155	CSF1R/ITK/RPS6KA1/BMX	4
up KEGG
ID	Description	GeneRatio	BgRatio	pvalue	p.adjust	qvalue	geneID	Count
hsa04010	MAPK signaling pathway	44596	294/8166	0.00738703	0.12558	0.0933099	HSPA2/FLNC	2
hsa05134	Legionellosis	44565	57/8166	0.0276347	0.128078	0.0951665	HSPA2	1
hsa04213	Longevity regulating pathway - multiple species	44565	62/8166	0.0300312	0.128078	0.0951665	HSPA2	1
hsa03250	Viral life cycle - HIV-1	44565	63/8166	0.0305099	0.128078	0.0951665	ELL	1
hsa04612	Antigen processing and presentation	44565	78/8166	0.0376701	0.128078	0.0951665	HSPA2	1
down KEGG
ID	Description	GeneRatio	BgRatio	pvalue	p.adjust	qvalue	geneID	Count
hsa04145	Phagosome	44702	152/8166	3.34628e-05	0.00141353	0.000856068	HLA-DRA/NCF4/MRC1/HLA-DRB1/HLA-DMB	5
hsa05140	Leishmaniasis	44672	77/8166	3.87269e-05	0.00141353	0.000856068	HLA-DRA/NCF4/HLA-DRB1/HLA-DMB	4
hsa05310	Asthma	44641	31/8166	6.2913e-05	0.00142	0.000859987	HLA-DRA/HLA-DRB1/HLA-DMB	3
hsa04640	Hematopoietic cell lineage	44672	99/8166	0.000103835	0.00142	0.000859987	HLA-DRA/CSF1R/HLA-DRB1/HLA-DMB	4
hsa04061	Viral protein interaction with cytokine and cytokine receptor	44672	100/8166	0.000107981	0.00142	0.000859987	CXCL9/CXCL11/CSF1R/CX3CR1	4
hsa05330	Allograft rejection	44641	38/8166	0.000116713	0.00142	0.000859987	HLA-DRA/HLA-DRB1/HLA-DMB	3
hsa05332	Graft-versus-host disease	44641	42/8166	0.000157779	0.00154515	0.000935782	HLA-DRA/HLA-DRB1/HLA-DMB	3
hsa04940	Type I diabetes mellitus	44641	43/8166	0.000169332	0.00154515	0.000935782	HLA-DRA/HLA-DRB1/HLA-DMB	3
hsa04672	Intestinal immune network for IgA production	44641	49/8166	0.000250301	0.00203022	0.00122955	HLA-DRA/HLA-DRB1/HLA-DMB	3
hsa05320	Autoimmune thyroid disease	44641	53/8166	0.000316157	0.00230795	0.00139775	HLA-DRA/HLA-DRB1/HLA-DMB	3
hsa05416	Viral myocarditis	44641	60/8166	0.000456517	0.00302961	0.0018348	HLA-DRA/HLA-DRB1/HLA-DMB	3
hsa05321	Inflammatory bowel disease	44641	65/8166	0.000577921	0.00342401	0.00207366	HLA-DRA/HLA-DRB1/HLA-DMB	3
hsa04514	Cell adhesion molecules	44672	157/8166	0.000609755	0.00342401	0.00207366	HLA-DRA/PTPRC/HLA-DRB1/HLA-DMB	4
hsa05164	Influenza A	44672	171/8166	0.000840878	0.00438458	0.00265541	HLA-DRA/HLA-DRB1/HLA-DMB/TLR3	4
hsa04612	Antigen processing and presentation	44641	78/8166	0.00098514	0.00464797	0.00281492	HLA-DRA/HLA-DRB1/HLA-DMB	3
hsa05152	Tuberculosis	44672	180/8166	0.00101873	0.00464797	0.00281492	HLA-DRA/MRC1/HLA-DRB1/HLA-DMB	4
hsa04062	Chemokine signaling pathway	44672	192/8166	0.00129526	0.00556198	0.00336847	CXCL9/CXCL11/CX3CR1/ITK	4
hsa04658	Th1 and Th2 cell differentiation	44641	92/8166	0.00158899	0.00629813	0.0038143	HLA-DRA/HLA-DRB1/HLA-DMB	3
hsa05323	Rheumatoid arthritis	44641	93/8166	0.00163924	0.00629813	0.0038143	HLA-DRA/HLA-DRB1/HLA-DMB	3
hsa05150	Staphylococcus aureus infection	44641	96/8166	0.00179597	0.0065553	0.00397005	HLA-DRA/HLA-DRB1/HLA-DMB	3
hsa04620	Toll-like receptor signaling pathway	44641	104/8166	0.00225895	0.00785253	0.00475568	CXCL9/CXCL11/TLR3	3
hsa04659	Th17 cell differentiation	44641	108/8166	0.00251581	0.00834792	0.0050557	HLA-DRA/HLA-DRB1/HLA-DMB	3
hsa05145	Toxoplasmosis	44641	112/8166	0.00279016	0.00885571	0.00536323	HLA-DRA/HLA-DRB1/HLA-DMB	3
hsa05322	Systemic lupus erythematosus	44641	136/8166	0.00482454	0.0146746	0.00888731	HLA-DRA/HLA-DRB1/HLA-DMB	3
hsa04060	Cytokine-cytokine receptor interaction	44672	295/8166	0.00613961	0.0179277	0.0108574	CXCL9/CXCL11/CSF1R/CX3CR1	4
hsa05169	Epstein-Barr virus infection	44641	202/8166	0.0142811	0.0400969	0.0242837	HLA-DRA/HLA-DRB1/HLA-DMB	3
hsa05166	Human T-cell leukemia virus 1 infection	44641	222/8166	0.018367	0.0496588	0.0300746	HLA-DRA/HLA-DRB1/HLA-DMB	3
hsa04660	T cell receptor signaling pathway	44613	104/8166	0.0288212	0.075141	0.0455072	PTPRC/ITK	2
hsa04670	Leukocyte transendothelial migration	44613	114/8166	0.0341319	0.0852885	0.0516528	NCF4/ITK	2
hsa05168	Herpes simplex virus 1 infection	44672	495/8166	0.0350501	0.0852885	0.0516528	HLA-DRA/HLA-DRB1/HLA-DMB/TLR3	4
hsa04380	Osteoclast differentiation	44613	128/8166	0.0421573	0.0992737	0.0601225	CSF1R/NCF4	2
