# Supplementary material for: Multiple effect mechanisms of FLNC in dilated cardiomyopathy based on genetic variants, transcriptomics, and immune infiltration analysis
Source: Research Square preprint supplement (doi:10.21203/rs.3.rs-2795537/v1), 2023-04-12
Supplement: Supplementary file 5 [file c6a6e7a9e7ccde96afa18308.xlsx]

## Sheet: Sheet1
Four datasets, GSE84796, GSE29819, GSE42955 and GSE120895, were merged, normalized
id	GSM3417936_Control	GSM3417937_Control	GSM3417938_Control	GSM3417939_Control	GSM3417940_Control	GSM3417941_Control	GSM3417942_Control	GSM3417943_Control	GSM1053922_Control	GSM1053929_Control	GSM1053939_Control	GSM1053940_Control	GSM1053942_Control	GSM739016_Control	GSM739017_Control	GSM739018_Control	GSM739019_Control	GSM739020_Control	GSM739021_Control	GSM739022_Control	GSM739023_Control	GSM739024_Control	GSM739025_Control	GSM739026_Control	GSM739027_Control	GSM2251540_Control	GSM2251541_Control	GSM2251542_Control	GSM2251543_Control	GSM2251544_Control	GSM2251545_Control	GSM2251546_Control	GSM739002_Treat	GSM739003_Treat	GSM739004_Treat	GSM739005_Treat	GSM739006_Treat	GSM739007_Treat	GSM739008_Treat	GSM739009_Treat	GSM739010_Treat	GSM739011_Treat	GSM739012_Treat	GSM739013_Treat	GSM739014_Treat	GSM739015_Treat	GSM1053915_Treat	GSM1053917_Treat	GSM1053918_Treat
A1BG	4.68565	3.94904	3.80419	4.684	4.10633	3.48946	4.36348	3.61923	4.15831	4.91671	3.28343	3.35625	2.74232	3.98285	4.02222	2.7676	4.67932	1.28789	4.27001	4.23564	3.27084	4.31432	1.81584	1.68924	4.42371	3.71047	2.81094	4.02472	3.22241	6.42673	1.81704	4.28039	3.58338	4.57283	4.16053	4.10771	1.6511	5.11843	1.81768	3.19047	5.54608	4.78144	3.35625	2.7277	1.75426	5.1477	5.04953	3.55832	3.57115
A1CF	3.51029	4.08452	3.01484	4.13335	1.96052	4.32603	0.663908	3.00926	3.09726	2.01033	3.23679	4.12629	3.38306	3.36318	3.22476	4.71277	3.65744	3.68061	4.58412	3.12253	3.32853	4.44491	1.17056	3.8191	0.180597	3.95616	3.98759	3.22355	3.19834	3.45129	3.40448	3.39517	3.50857	3.67958	3.72251	2.02564	2.99691	0.172487	3.24839	3.88518	3.93004	2.41412	3.95286	2.57569	4.0919	3.72985	3.11693	3.53271	3.33788
A2M	9.40834	9.20955	9.68521	9.58989	9.93453	9.38977	9.08698	9.17412	9.92621	9.28108	9.55614	9.57135	10.2527	8.89576	8.86935	9.66038	9.78962	9.288	9.57135	9.95145	9.90885	9.62892	9.67194	9.88267	9.95503	9.72723	9.36808	9.63919	9.76138	9.09067	9.54118	9.30079	9.69054	9.73607	9.35705	9.21595	9.21413	9.25039	9.66883	9.62318	8.88459	9.12357	9.11102	8.99872	9.26973	9.11835	9.12717	9.10542	10.2129
A2ML1	2.0268	3.29063	0.647526	3.59328	2.71044	2.8389	2.30247	0.637629	2.65732	1.92194	2.90387	2.18399	3.05563	1.69955	2.76667	1.64377	0.220225	2.05107	4.33674	1.35471	2.78633	4.39261	3.42604	2.91421	0.805254	3.9814	2.06978	2.00938	2.38947	2.59313	4.39261	2.07203	0.984691	1.99215	2.07081	3.20446	2.49643	4.27182	3.96519	1.08505	3.42817	3.11822	4.07198	3.10992	3.69307	3.88518	1.34341	1.96944	2.80763
A4GALT	4.82119	4.60702	4.8374	3.40014	1.36564	5.08116	4.06303	4.48676	5.63292	4.59415	4.56508	4.31391	3.67472	4.07528	6.09047	2.82398	5.44735	3.67903	4.44927	4.38945	4.87033	3.95664	1.07376	5.56499	6.05743	4.77214	3.66251	4.95542	5.48765	4.60361	5.10586	5.12886	4.72929	3.83002	3.38761	4.0545	4.59117	1.59824	3.12632	3.41722	4.66314	2.02468	3.74273	3.71796	4.27368	1.48735	4.63763	4.20355	3.61525
A4GNT	4.13932	3.8107	3.88954	2.59934	3.81166	3.04295	3.19047	3.83303	4.10633	4.32556	3.75648	3.69163	3.06932	3.90141	3.96694	4.02389	1.97213	3.28064	4.23232	3.99726	3.37516	3.57468	3.48724	4.21574	4.11712	4.42913	3.87942	3.81735	4.06693	4.33721	4.01352	3.75181	4.01175	4.28455	4.43621	4.12907	4.28772	4.22699	4.26399	4.0092	4.46947	3.50458	4.12815	4.61136	3.97126	1.76634	4.53947	3.71419	3.99498
AAAS	1.13595	5.07107	1.86408	1.19043	5.57981	4.66015	5.10586	5.41917	1.49969	2.94363	4.36348	5.50196	4.61392	1.76578	5.97844	2.83986	6.2072	5.84014	3.58433	5.19161	6.07912	2.88126	3.62152	4.88175	2.10324	5.26421	5.7994	3.82712	3.73914	3.97083	3.23802	4.29959	5.26497	6.13544	2.99745	4.92147	3.90005	3.40545	4.99558	5.99711	3.25728	3.8246	4.24151	1.20784	3.1394	5.67992	5.4537	5.26694	4.60487
AACS	6.7122	6.12011	6.87039	6.32907	7.05465	6.14284	6.34495	6.84185	6.23911	6.21867	6.44342	6.16654	6.62228	6.19769	6.62766	6.59417	6.73676	5.92182	6.76733	6.22406	6.25342	6.54136	5.9128	6.95364	6.95855	6.64166	6.60486	6.61681	5.97196	7.16358	6.48495	6.34731	5.19868	5.61143	6.30711	6.23401	6.3046	6.26415	5.76111	6.48373	6.3343	6.35993	6.74268	6.6739	6.51999	6.54867	7.04573	6.04102	5.53163
AADAC	2.91046	1.39188	0.940641	0.932529	1.53228	0.91154	0.903888	0.937162	0.765543	1.32256	0.141275	1.49533	1.28047	0.196141	0.465876	1.3696	0.759336	1.07501	1.28569	3.11389	0.463947	2.94292	0.974288	0.986649	1.45393	1.73392	2.98845	1.20207	1.11491	1.35523	1.00041	0.906214	1.88197	0.485424	1.03222	3.04224	3.8169	1.73155	1.84136	0.851506	0.60063	3.55832	1.64865	1.19927	1.15778	0.16796	1.10744	0.725957	1.21168
AADACL2	0.951383	2.73287	3.0356	2.56188	2.25991	3.54115	0.990852	2.28919	-0.246945	1.21479	1.28047	1.40471	0.87893	2.88941	2.67647	0.234642	2.66191	0.593288	3.31522	1.99605	3.71212	1.31995	1.51748	2.80109	0.969535	1.95199	1.24336	1.21751	1.36621	1.58889	3.49561	3.07003	1.63147	0.836407	0.225002	3.36604	0.18611	1.67703	1.14144	0.197018	2.62069	3.80528	0.23674	0.248354	2.5766	0.178667	1.61928	1.7759	2.41867
AADAT	3.59889	1.15778	1.23975	1.23875	1.18991	4.37447	5.17468	3.23606	1.63373	1.2506	3.43502	1.70187	3.34995	4.48001	-0.602941	1.79955	2.07645	3.6492	5.27891	2.54796	1.77082	3.62865	4.35445	2.18399	1.41637	2.51906	4.27091	2.07727	3.51786	2.48558	2.47049	3.21996	2.02564	4.40488	1.68868	3.97949	4.09904	1.63316	3.62966	3.70531	2.99814	3.67132	2.79598	1.43882	4.07106	1.21228	3.69554	3.92457	1.66136
AAGAB	5.40335	5.69209	5.48162	4.51465	5.14063	5.52002	5.82226	5.86222	5.15896	5.5261	4.99678	4.95629	5.12808	6.45249	6.03243	6.09876	4.99796	4.632	4.19293	5.17731	5.70366	5.4869	5.15977	5.2266	5.14182	5.83863	4.87446	5.79663	5.77458	4.4004	5.64815	4.68229	4.88409	4.96914	4.90839	5.48878	5.46424	4.934	4.79123	5.12962	6.05279	5.43105	4.61392	5.26276	5.99744	5.27164	4.66058	5.84694	5.50983
AAK1	6.59809	6.51364	6.09628	5.93059	6.74888	6.80162	6.58541	6.96718	6.03945	5.67512	7.21844	5.88707	6.70974	6.32369	6.19701	6.17614	5.548	6.60453	6.4818	6.2013	6.01644	6.20983	6.2549	6.00018	5.55296	5.62113	6.45093	6.30862	6.40394	5.74769	6.35136	6.55501	6.25567	6.1747	6.87442	6.33848	6.41506	6.0641	6.84575	6.15974	6.66274	6.4937	6.33775	5.84659	6.79325	6.58086	6.49293	6.10382	6.1587
AAMP	6.71432	6.72749	6.82445	6.53768	6.61485	6.52352	6.60171	6.69677	7.05092	7.02862	6.58978	6.35341	6.95758	6.2664	6.64694	6.37371	6.79641	6.28718	6.25028	6.70068	7.09036	5.33397	6.86957	6.63725	6.41767	7.17952	6.45711	6.09957	6.62015	6.14979	6.59058	6.35918	6.21955	6.60889	6.2355	6.28823	6.11341	6.41982	5.73999	6.23478	6.53579	6.87622	6.66274	6.76645	6.15834	6.91145	6.3135	6.09841	5.78841
AANAT	1.29381	1.26517	1.346	1.34496	1.30103	1.2967	1.2984	1.31669	0.282647	1.65166	-0.0461083	0.77457	0.570095	1.01797	1.94491	0.108533	1.12251	1.17792	0.95561	1.13891	3.03073	2.75	0.311782	1.3651	0.326483	1.54868	0.894786	0.453508	1.16828	1.14089	0.246742	1.19759	0.850697	1.82669	1.0523	1.40705	0.941312	1.48146	0.244917	0.779831	0.972801	0.814386	0.915657	3.22053	1.86408	0.416735	1.23326	0.837276	0.212636
AARS	7.70248	7.74178	7.29488	7.442	7.96095	7.96243	7.71528	7.71985	7.3107	7.46733	7.67108	8.19668	7.80465	6.30419	7.74178	7.21322	7.90258	6.5683	7.59523	6.59894	7.63049	7.51628	7.37128	7.86502	8.16107	8.4056	7.55033	7.54863	7.59189	7.91049	7.36026	8.25697	8.08236	7.96949	7.40462	7.54918	7.83481	8.03412	6.68955	8.19324	7.84471	8.03837	6.48969	8.11546	7.48699	8.05675	7.6092	7.23124	7.34115
AARS2	4.48595	5.02862	5.08437	5.22512	4.69886	4.79595	4.25733	4.61346	3.20083	3.67562	4.77868	4.44398	3.84985	4.31391	0.710951	3.99398	5.2559	4.34927	5.25126	5.13954	4.5066	4.60778	4.46778	4.56863	5.39091	4.42696	5.10119	5.17146	4.02389	4.13639	3.63608	4.54688	4.69886	4.4383	5.31598	4.62817	5.12107	4.35495	5.19586	4.8139	5.58222	4.448	5.15073	4.632	4.99438	4.86879	4.89283	4.52185	4.54502
AASDH	5.66997	5.38835	5.67992	5.94615	5.4537	5.82192	5.66332	5.34018	5.12107	5.75752	5.73165	5.70403	5.49194	5.75371	5.07566	5.40954	5.78703	5.59027	5.57946	5.9766	5.71758	5.64437	5.08716	5.68716	5.65618	5.65767	5.88105	5.36132	5.93925	5.62709	4.95216	5.42733	5.78841	5.70038	5.60833	5.32222	6.14758	5.58962	6.13432	5.47939	6.10458	5.39684	5.92047	5.50538	6.09082	5.51738	5.24409	5.88987	5.75435
AASDHPPT	7.22975	7.52558	6.86877	7.1928	7.11176	7.27034	7.38476	7.09405	7.05236	7.29321	7.16203	7.37017	7.351	6.77953	7.09929	6.96811	7.51325	6.99037	7.31632	7.05416	7.09871	7.54047	7.17649	6.92425	6.88992	7.3389	7.58472	6.92252	7.09506	6.74023	6.888	7.21688	7.57238	7.59831	7.22211	7.54443	7.3819	7.57477	7.57059	7.39471	7.14708	7.50043	7.23481	7.34482	6.95179	7.43805	6.7514	7.65757	6.87479
AASS	5.76179	6.28529	5.78799	5.5593	6.11057	5.97873	5.76706	5.97234	6.77469	6.45314	5.64642	6.43236	6.20064	5.6172	5.69592	6.19231	6.25752	6.16765	6.08211	5.28319	4.80328	6.21792	5.88	5.8718	6.07442	5.61654	6.13544	6.16654	5.68788	5.34018	6.34651	6.32907	6.07069	5.44081	4.83866	5.14654	5.71339	5.41033	5.64603	4.94674	5.45227	4.8921	6.35882	6.15453	5.9095	5.3315	5.92394	5.40852	4.92348
AATF	5.76605	6.54713	6.25601	6.12435	6.02663	6.62891	6.4575	6.60934	6.21635	6.5315	6.77609	6.26415	7.0023	7.00128	6.80389	6.63243	6.13362	6.3618	6.32287	6.01276	6.67917	6.23185	6.59489	6.26784	6.90313	6.96493	6.68037	6.34377	6.26495	6.36449	6.43774	6.23254	5.64886	6.27693	6.63127	6.30975	6.0328	5.8692	6.43126	6.69814	6.41645	6.71741	6.29789	6.56178	6.41576	6.70646	5.79559	6.45001	7.09602
AATK	5.54275	5.82263	5.38426	5.69074	5.94983	6.20686	5.49705	6.63208	6.44383	5.68279	5.17927	5.37493	5.9132	5.64848	6.20064	6.12655	5.36383	6.40745	4.78524	5.81646	6.19808	6.4282	5.87785	6.34922	5.65912	5.67877	5.94912	6.0751	6.35574	6.99136	5.80707	6.89043	5.92427	4.98063	6.25853	5.50049	5.59369	6.13071	6.10028	5.79323	6.46034	6.33812	6.18188	6.61644	5.26974	6.53689	5.95562	5.89676	5.26833
ABAT	5.4723	7.57854	6.71741	5.18877	7.57059	6.29542	5.44952	6.70924	8.42634	6.37092	7.31473	7.8053	7.03197	6.13292	5.44767	6.58298	6.96355	7.30036	7.58111	5.89565	5.50347	6.25895	6.03169	7.48592	6.19634	6.81325	7.1882	6.45827	5.53058	6.93544	6.05565	6.76004	7.36026	7.52935	7.16008	7.06091	6.32556	6.36407	7.66274	7.38253	7.4431	7.62165	7.64866	7.10083	7.40639	7.24752	6.06154	7.65506	5.89497
ABCA1	5.58301	5.97441	5.81096	5.49536	5.5126	4.93512	5.50308	5.17697	5.56675	5.65377	5.77122	5.8916	5.84452	5.33754	5.65161	4.81956	4.85041	5.79842	6.00018	6.13579	6.081	5.58782	5.60008	5.23153	5.3004	5.3126	6.22895	5.32816	5.69703	5.71758	5.41178	5.78346	5.60414	5.40517	5.85943	5.64747	4.63021	4.3568	5.5745	5.32853	5.77538	5.66437	6.02016	5.79728	5.97589	5.65125	5.95275	5.75602	6.61356
ABCA11P	5.88105	5.59339	5.51082	5.23342	5.62187	5.26581	5.39573	5.29836	5.2403	6.07406	5.1568	4.94799	4.80856	5.01276	4.53512	5.41354	6.07876	5.19625	5.31826	4.89245	4.5629	5.17927	5.85229	4.90624	5.71412	4.57414	5.47654	5.31123	5.22369	5.89326	5.32064	5.38281	5.6824	5.56027	5.89992	5.6769	5.92219	5.72007	5.38978	4.93841	4.83248	5.24446	5.87512	5.0726	5.11958	5.79425	5.73893	5.67482	5.30798
ABCA12	0.739018	2.70959	2.92542	2.26815	0.708856	0.765543	3.87421	3.41344	0.861924	1.19586	1.72321	2.63206	1.3471	0.940641	3.05356	0.173358	3.44903	0.0556633	0.777929	2.12765	1.74622	2.39866	2.6002	2.46732	2.93517	1.86916	1.71082	1.17234	1.32943	1.57456	1.273	1.13714	-0.177119	2.04796	-0.138372	2.2562	1.92194	1.61639	0.618179	1.95612	0.821576	3.37852	-0.183949	2.21763	0.00382001	2.08384	0.926937	1.27868	0.732664
ABCA13	2.55676	0.670605	1.52579	0.734406	1.97305	3.03754	1.71555	2.65314	1.85204	1.16769	1.36175	1.2506	1.41143	2.63574	2.41168	1.728	2.5766	1.77403	1.25167	1.14321	0.828214	1.16012	1.96296	-1.31744	1.02955	1.58201	1.01547	1.0567	1.13773	1.20495	4.34562	1.12012	0.645178	2.06126	1.75605	1.96296	1.76212	1.42946	1.29005	1.64681	2.54685	1.57197	0.923149	2.8347	1.16769	1.45071	1.37316	1.43334	1.27016
ABCA2	3.99498	1.89361	3.57003	4.51254	4.44353	3.6512	3.68246	1.94409	3.15627	1.68519	3.86463	3.32403	3.0167	2.54293	2.44832	1.61187	2.05315	1.81768	3.34611	2.23666	3.35855	1.71424	3.39286	2.30247	3.48105	3.23679	3.71796	3.2416	1.8332	4.09271	2.73287	3.61241	3.27629	3.7938	3.18112	3.52786	2.99545	2.77753	2.23319	3.98615	2.63206	3.77814	2.57761	3.2822	2.92542	5.0488	1.6187	4.22433	3.34243
ABCA3	3.99771	4.31647	4.10913	4.54944	5.04605	2.96568	4.7778	4.64196	3.05631	4.1758	4.51584	4.31476	4.59501	3.88819	3.47327	2.70684	5.15938	2.89476	2.80604	3.62865	4.71159	4.75288	4.77915	5.39131	1.61119	4.48844	4.51086	3.77981	3.67472	4.45101	2.76667	4.25224	3.26268	4.00432	1.95712	5.13873	3.61472	5.65271	1.53394	4.26316	1.5586	4.63387	3.0522	5.03895	1.73218	5.90615	3.95037	5.16672	4.09599
ABCA4	0.842638	3.25322	0.897093	2.45064	1.91708	0.864366	2.21516	0.877346	2.08701	1.29005	1.56817	0.670605	1.75121	3.03683	0.695523	5.25632	3.11822	2.14988	1.01062	1.00576	1.69038	1.5815	4.12859	2.21386	3.03145	2.46646	4.27808	2.59934	1.19586	1.2984	1.52462	1.16012	1.53734	1.39025	1.77335	0.033705	1.81518	1.3094	1.26343	1.01611	1.05726	1.44381	0.870504	1.74505	0.897093	1.16711	1.61579	1.58889	1.13714
ABCA5	5.94912	6.70312	5.48948	6.35382	6.63687	5.99562	6.77698	6.59335	5.56429	6.29749	5.6875	5.53124	5.77494	6.16992	5.61506	5.6714	5.80395	6.38872	5.7413	6.31781	6.19987	6.29088	6.36782	5.49745	5.20294	5.65548	6.33213	6.29464	5.60298	5.91972	5.43576	6.57604	5.92363	5.41399	6.25976	5.82546	6.24152	5.91746	6.3135	5.3756	6.25528	6.03848	6.58663	6.36669	5.9338	5.75909	6.37892	5.70511	5.54055
ABCA6	4.55807	5.79225	6.76048	5.39362	6.59417	6.11517	6.78038	6.38486	3.83112	5.32453	5.94109	5.34018	4.67602	4.74155	4.22021	4.4387	6.14463	4.75573	5.9629	5.38207	5.93965	5.09387	5.3701	4.33937	3.23478	4.55369	5.13414	4.10998	4.25022	4.90763	6.53269	5.87067	6.3434	5.88886	4.53123	5.46307	7.00128	6.6461	5.74695	6.13034	6.4453	6.55898	5.95562	6.19701	6.77113	6.38942	5.77885	5.76081	8.61587
ABCA7	4.83576	4.20618	1.26708	3.07508	3.39698	1.22266	4.61961	1.24336	3.21103	3.00161	3.03267	3.9992	3.46122	3.17051	3.33094	0.704756	4.31864	4.39479	1.04077	3.43822	4.77651	3.68799	3.43502	3.53271	4.73772	3.02945	1.99022	3.78483	1.12896	3.79222	3.1157	3.80085	4.1808	2.75964	4.09731	-0.0606992	3.94553	3.51586	4.3586	3.56408	3.72251	3.83158	2.66284	1.1531	3.67859	1.28847	4.53417	1.72923	3.78483
ABCA8	7.62671	7.84732	7.85231	8.22091	7.97869	7.68887	8.03161	7.75712	7.06919	7.03385	8.05352	7.39525	7.77743	6.9494	6.63243	6.9444	7.64923	7.59466	7.47201	7.7819	8.04787	8.11782	8.49666	6.98901	7.89449	7.19524	8.54407	7.29585	6.49206	7.39252	7.41786	7.44647	8.19835	7.49827	7.43737	6.88151	8.33801	7.96095	7.66522	7.71225	7.98743	7.98811	8.01554	7.72185	7.94349	7.71528	7.02518	7.47984	8.42094
ABCA9	5.48016	6.04727	5.61903	6.0751	6.00124	5.71863	5.76046	5.54608	4.06499	4.88975	5.74769	5.83402	5.24177	4.86453	4.50275	4.62259	6.2381	4.71716	5.60298	5.71129	5.39399	5.16178	5.70622	5.28896	5.83402	4.30397	5.20892	5.40587	6.02309	6.07028	6.01392	5.90166	5.33466	5.2859	5.85843	5.10947	6.06154	6.38134	5.91241	5.93553	5.68279	5.56745	6.48612	5.60661	6.03884	5.92461	5.78703	5.71129	6.5021
ABCB1	3.57165	4.02987	3.44433	3.64723	3.92069	3.81445	3.95939	1.19868	3.07772	4.57846	3.56475	5.89262	4.67892	3.61241	5.08997	3.55944	3.226	4.28374	3.17747	3.76645	3.65068	3.57892	1.6286	3.77981	2.97672	4.32827	3.04086	3.26439	4.8667	2.52702	3.378	4.80688	4.07147	2.28551	3.95664	2.87528	4.10957	3.75801	4.25493	3.86181	4.15424	3.39698	1.90566	2.82728	4.65617	4.80166	2.92767	3.76395	3.98088
ABCB10	7.0792	7.20174	7.02296	6.83845	6.47081	6.39884	6.57192	6.44883	7.07962	6.62891	6.79511	6.50652	6.796	6.84871	7.13194	6.77187	7.19371	6.69677	6.43444	6.39324	6.30193	7.09362	6.29932	7.06542	6.60845	6.33247	6.53544	6.51006	7.11369	6.67917	7.02249	6.71139	6.75553	6.40711	5.97589	6.62228	6.5918	6.87796	6.65239	6.65821	6.37251	6.83124	6.67555	6.46744	6.22483	6.09662	6.84704	6.12803	6.40002
ABCB11	0.992873	0.941916	1.03027	2.34303	0.983295	1.00378	0.99417	1.02623	0.215338	0.271285	0.163664	0.868094	1.00576	3.05428	0.253392	0.339294	1.54868	0.544476	0.983295	0.263427	3.12562	1.38328	2.51082	1.24336	1.06043	0.913584	1.66249	0.248354	2.91046	2.22705	1.33597	1.16769	1.22975	1.68641	0.326483	1.81768	0.0967541	1.28895	2.0676	0.930256	0.975696	0.671627	0.188105	0.77457	0.867405	1.42234	0.200288	1.69149	1.31732
ABCB4	5.62502	5.22626	6.2496	5.41317	5.40374	6.23218	5.55332	5.66785	5.95275	5.1995	6.10702	5.69557	5.52475	5.66092	5.45796	5.68897	5.50463	6.29932	6.14902	5.59027	5.27281	5.92531	5.79048	5.50615	5.0207	5.7361	5.81717	5.45752	5.70694	5.65804	5.76875	5.8758	5.57374	5.53779	5.68466	5.14919	5.35822	4.90473	5.30877	4.68689	5.63867	5.41996	5.46053	4.63387	5.87401	5.54766	5.52475	5.91891	4.61961
ABCB5	1.53283	0.739779	4.11362	2.5904	2.54496	1.27249	2.78968	0.836407	1.00378	1.99605	1.93525	1.72743	2.99473	1.34544	2.12425	1.04016	2.73121	2.42619	2.09165	3.10057	1.38269	2.9016	3.49053	1.91286	1.59116	3.12744	3.03318	1.47022	1.62802	1.86046	1.51967	1.47561	0.14368	2.48457	-0.999504	3.00362	0.771996	3.87217	1.25617	1.89361	1.09694	0.690195	2.31222	1.50747	3.22355	3.724	1.75974	3.0167	1.47505
ABCB6	4.96666	4.36167	4.88023	3.63763	5.18525	5.10687	5.326	5.25043	5.3464	3.97458	5.16336	4.8667	4.60113	4.54547	3.02874	4.37037	3.22415	4.98902	4.54284	5.07063	4.94674	5.69743	5.2957	4.59415	4.60027	4.23418	4.57806	5.17544	5.09259	5.49424	5.17506	5.47261	3.84735	3.77712	4.65732	3.938	5.5126	4.19582	5.5502	4.55369	5.06177	4.33532	4.90192	3.15263	4.26182	4.19984	3.77099	4.02389	3.62416
ABCB7	7.00373	7.04336	7.36086	7.63877	7.28046	7.50934	6.97606	7.05573	7.33434	7.05285	7.51104	7.79228	7.71402	7.62481	7.69361	7.24961	7.49358	7.41567	7.62731	6.81546	7.27457	7.66522	7.98422	6.9453	6.42187	7.56273	7.66971	7.65506	7.07828	7.09929	7.30673	7.45606	6.97967	7.60452	7.50818	7.06406	7.41567	7.6526	7.7405	7.60858	7.63999	7.08094	7.28046	7.56099	7.30618	7.35151	6.64166	7.6917	6.92759
ABCB8	3.45856	4.44353	2.84058	3.56529	4.35588	4.0186	4.67044	4.39578	3.73441	4.03843	3.86515	4.09001	3.53956	3.79432	4.44927	3.35973	4.06303	4.46258	4.18209	3.50916	2.64331	4.01641	4.16715	4.00387	4.87074	4.42206	4.49698	3.73497	3.35922	3.62865	3.40769	4.43573	4.05872	4.3586	4.45594	4.25818	3.67562	4.70435	4.41452	4.42731	3.85087	2.0059	4.13848	3.8808	3.9766	4.55067	4.06162	4.06209	3.47757
ABCB9	1.29439	1.26576	1.34652	1.34544	1.30155	1.29726	1.29894	1.31732	2.21386	1.70316	1.54003	1.87673	0.249287	-0.150766	3.64215	-0.0962802	2.0676	3.65374	3.11336	3.16987	2.88787	1.67098	1.72743	0.0839589	0.80109	1.59291	1.58779	3.63915	2.68495	3.70215	1.42651	1.49803	3.20959	3.03754	3.54583	2.22705	3.09206	2.11213	1.93002	2.6923	1.44164	3.15863	0.196141	0.0755663	3.54436	1.16769	1.2748	2.50203	1.84199
ABCC1	6.30079	6.22782	6.28604	6.17284	6.059	6.22026	5.72257	5.83432	5.66856	5.93814	6.2664	5.97517	5.38244	5.75972	5.92996	6.40941	6.12685	6.14653	6.10318	5.74202	5.23191	5.83975	6.0776	5.66997	5.63617	6.02377	5.50049	5.95848	5.77307	5.72404	6.26716	6.33585	5.71794	5.4519	6.40711	5.51585	6.02911	5.87854	6.2564	5.67305	6.00188	5.46013	5.86663	5.84123	6.07442	5.86511	5.30839	5.98095	5.71937
ABCC10	6.00922	5.73579	6.05319	5.28737	5.5573	5.70473	5.35603	5.49194	5.55188	5.19625	5.48329	5.49783	4.89522	5.31759	4.86503	5.35347	4.97503	5.72044	6.16206	5.798	5.86144	5.60044	5.80141	5.42696	4.95948	4.83128	5.29802	5.43613	5.50911	5.6605	5.64047	5.61903	5.42375	5.2194	5.81195	5.09305	5.74657	5.57482	5.20035	5.71235	5.49936	5.42132	5.51375	5.17389	5.38175	5.10619	5.70473	5.53747	6.34572
ABCC11	3.46673	1.84857	1.09811	1.10111	2.56475	4.10542	1.0567	1.08639	1.40823	1.91043	1.8554	0.565552	1.22075	0.368559	2.24418	2.71846	0.38661	0.538221	1.63259	0.0455075	3.72049	2.57286	0.397895	1.11257	2.37644	1.99885	1.46197	1.40403	1.58662	1.81831	1.48895	1.38801	1.21386	0.342991	3.54957	2.7693	1.52858	3.12857	0.82737	2.47779	2.5904	0.890481	1.06206	1.51907	1.83389	3.0846	1.65661	1.0148	1.52294
ABCC12	1.35629	1.32367	1.41046	1.40471	1.36284	1.91441	1.70487	1.3696	0.80109	0.780678	0.903099	0.856648	0.277803	1.21909	2.7456	1.72088	1.7096	1.53561	0.788619	1.32628	0.670605	0.217317	1.39531	0.0455075	0.754065	0.965563	0.835628	0.818883	0.873602	0.831507	0.792133	1.25286	1.25116	0.503243	0.860537	0.491092	1.23326	1.44381	0.749404	0.554461	1.4697	0.255085	0.573518	1.64623	1.32054	1.64133	1.56217	0.771053	0.656018
ABCC13	3.13683	2.53344	0.916362	2.46845	1.93845	3.33513	2.43552	1.85134	1.36074	1.65042	1.75367	1.40769	1.50808	0.784163	1.13128	2.80931	1.74505	1.09488	1.19586	2.79931	1.31995	1.11614	2.64922	3.13614	1.96586	2.20447	1.63901	1.61759	1.80075	2.03301	1.62979	2.25391	0.244151	1.42708	1.36126	2.58054	2.74409	3.18112	2.13796	2.57569	2.88873	1.42824	1.67395	1.56709	1.63732	2.83806	1.30489	1.79035	2.78478
ABCC2	1.01205	0.967542	1.0504	1.0567	1.00713	1.02822	1.01668	1.04704	0.934544	0.846651	0.891847	1.51907	1.13959	1.0174	1.09188	3.28779	0.551327	2.46279	2.38361	3.21422	0.16796	0.80109	0.268755	1.49861	2.6726	0.886933	0.25878	1.08003	0.861924	0.724086	2.12893	1.48627	2.42509	0.686985	1.55532	0.764614	0.599066	0.371276	0.656018	0.992234	1.60407	0.268755	0.453508	0.215338	0.225964	1.15667	0.60775	1.28619	1.25934
ABCC3	0.15298	0.131626	0.15764	0.169861	0.158918	0.160169	0.150803	0.153998	4.13979	3.95334	3.89184	4.04066	3.96087	3.65429	5.10358	3.85087	3.26804	3.19954	3.74075	2.91897	3.82804	3.28889	4.48459	2.38361	4.08132	0.132612	-0.459521	-0.00551668	-0.272647	0.111191	-0.150766	-0.359414	3.0497	3.67174	2.51984	3.65429	2.8428	3.17178	2.97393	4.50829	2.13138	3.77712	3.18673	2.04493	3.65429	3.58764	3.7983	3.99591	4.0034
ABCC4	3.25322	4.24239	3.98333	2.51906	3.62302	4.92225	3.53068	3.84123	3.92903	4.08862	4.52633	4.57931	4.85985	4.30532	4.61429	4.6086	4.8337	4.89754	3.79741	4.24517	3.7983	3.54485	4.03365	3.88233	4.17915	5.00643	3.85033	4.78693	4.21574	3.02507	4.62343	4.28	4.09411	4.11712	4.00206	4.03931	3.68449	3.73187	3.52955	3.69908	4.69978	4.15424	3.54436	3.15984	5.06745	4.57715	2.70407	4.22337	4.35359
ABCC5	6.87129	7.37648	6.27385	6.53426	6.96718	6.57516	6.85326	6.81988	7.82396	6.64253	6.3336	6.19808	7.55162	7.50043	6.99487	6.44848	6.32866	6.71741	6.1089	7.37555	7.12852	7.54273	7.12556	7.02432	6.57561	6.49008	6.41205	7.548	7.63372	6.55501	7.00332	6.38708	6.14902	6.05385	6.07837	5.70001	6.22636	6.30903	6.36254	6.11087	6.25822	6.17753	6.38826	6.27132	6.1927	6.24746	6.33321	6.01172	6.37289
ABCC8	1.87598	1.82323	1.92117	1.94674	1.84323	1.85264	1.84388	1.86408	0.979218	1.77467	-0.121723	0.403371	1.10626	3.37398	1.1531	0.968856	1.48573	1.83676	3.12136	1.59116	1.06512	0.818883	1.02762	1.29229	1.03222	1.18528	3.06233	1.33891	1.08819	2.31824	-0.15642	1.70071	1.14425	1.03876	0.570095	1.73037	1.90409	0.549595	2.5064	0.937905	2.77504	1.85401	1.85264	2.01705	1.0504	0.972801	1.45852	2.75087	0.667344
ABCC9	6.06665	5.74554	5.30877	6.24299	6.40594	6.13733	6.25528	6.0894	6.13615	5.57294	7.11133	6.22561	6.38708	5.84191	5.75045	5.94065	7.03722	6.07991	6.17753	6.04142	6.60453	6.57561	6.8551	6.35454	6.21512	5.81164	7.17355	6.29664	5.8516	5.46925	5.89779	6.04245	5.60159	6.2468	6.02491	5.66437	5.99603	5.96186	5.98606	6.19597	5.2194	5.83615	5.79185	5.71203	6.003	5.86408	5.40954	6.02911	6.52239
ABCD1	5.63583	4.23802	5.55188	5.64146	5.15371	4.71757	3.50246	4.81641	5.2927	5.24851	5.59937	5.25324	5.51966	4.83208	3.84123	5.46159	5.09589	5.4296	4.92348	4.94757	5.02535	5.09152	5.30279	5.23706	5.52077	6.03025	5.3126	4.8224	5.0797	5.30911	5.20329	4.89283	4.61022	5.3024	5.55964	5.34778	5.57119	5.33239	4.73693	5.68897	5.12768	4.03171	5.42841	5.67379	5.56745	5.56499	4.62691	5.64499	5.55514
ABCD2	3.64765	3.83927	4.80207	4.41268	3.32919	4.13587	4.78617	4.34927	3.43055	5.51896	5.40587	4.54547	3.47327	4.3152	4.70475	3.90751	5.03149	4.50956	4.49936	4.8127	4.85215	3.59216	3.26804	1.99605	4.15292	4.34255	4.65732	3.37234	3.62152	4.72628	3.3146	5.44809	3.42272	3.65481	4.83495	3.77413	4.9735	4.91466	4.93109	4.5828	4.42554	4.38024	5.10619	4.27322	4.30346	4.56157	3.6588	4.55107	4.67682
ABCD3	8.79573	8.65439	8.41467	8.44515	8.62639	8.63152	9.00043	8.85929	7.23221	7.72592	8.29193	8.49889	7.88994	8.57329	8.86805	7.95552	8.14474	8.24912	8.00487	8.64761	9.24788	8.30516	8.37815	8.00712	7.6814	8.42745	8.17851	8.35824	9.2949	8.50975	8.75529	7.95943	7.58419	8.41576	8.20596	8.36415	8.25788	8.60158	7.70902	7.71164	8.11709	8.45231	8.31848	8.61708	8.18414	8.48329	7.93528	8.6595	8.32232
ABCD4	4.8513	5.30946	5.58636	4.64013	5.25241	5.25043	4.9706	5.62742	4.86791	4.8192	5.05643	5.05935	4.88811	5.08871	5.66132	4.12954	4.95672	5.30506	3.60927	5.98135	5.57804	5.3571	5.22825	5.13992	4.36306	4.88726	4.39382	5.10507	4.71495	4.96414	5.87324	5.23743	5.3271	4.96622	4.66058	4.71585	4.99323	4.67288	5.0207	5.02829	4.98787	5.02405	5.20487	5.12461	5.04762	5.04725	5.85539	4.87293	4.95795
ABCE1	7.09362	7.16961	7.25007	7.15124	7.0079	7.20219	7.27665	7.04864	7.28258	7.0088	7.137	7.18711	7.27186	7.04623	7.45	6.99578	7.40174	6.70719	7.0112	7.08434	7.62992	7.22622	7.4905	7.03577	7.16961	7.20219	7.23273	7.61867	7.10755	6.8414	7.38368	7.01294	7.07639	7.23738	6.98332	7.27346	7.12709	7.36188	7.39942	7.43805	6.94391	7.31729	6.98104	6.90605	7.00183	7.20675	6.64253	7.25341	6.97826
ABCF1	7.15602	7.40046	7.15809	7.42856	7.3777	7.55747	7.32854	7.68351	7.55636	7.64686	7.78665	7.69361	6.96672	7.57664	7.25341	7.536	7.45542	7.21844	7.32474	7.07593	7.15602	7.72532	7.42856	7.32801	7.11974	7.56156	7.61375	7.73021	7.7239	7.58665	7.6526	7.32697	7.71595	7.71985	7.68283	7.6666	7.47936	7.68351	7.56997	7.40462	7.77743	7.71595	7.32801	7.38702	7.42572	7.73176	7.41514	7.50278	7.28466
ABCF2	5.13715	5.49824	5.31087	4.91671	5.50124	5.34821	5.70226	5.87821	5.62044	5.52399	5.25359	5.38762	5.06981	6.00188	5.70117	5.72074	5.18487	5.38537	4.99757	5.51786	6.15601	5.57482	6.19045	5.03767	5.38352	6.20027	5.45263	5.89056	5.92085	5.4678	5.97234	5.78841	5.5356	5.85647	5.77351	5.88571	5.13992	5.43325	5.25466	5.48581	5.76767	5.76353	5.4519	5.38352	5.67068	5.85843	5.25932	5.57916	5.44625
ABCF3	5.88635	6.07151	5.03811	5.59095	5.7859	5.46817	5.53598	5.02405	5.21156	6.5606	5.66785	5.46502	5.56283	6.32556	6.50255	6.36449	6.04102	6.11127	6.25714	5.76353	5.76282	5.80642	5.49312	5.58146	2.94789	7.08205	6.39366	5.95425	6.1326	5.89194	5.66332	6.06048	6.02523	6.17895	6.31174	6.25064	6.3336	6.39924	6.14577	6.10166	6.05352	6.23107	5.66965	6.23878	6.32442	6.06336	7.02432	5.44882	4.81804
ABCG1	5.72044	5.59733	6.39554	4.98748	6.06009	5.76246	5.30798	5.78661	6.07953	6.23218	6.04906	6.2055	5.50615	5.6573	5.71129	5.49013	5.26345	6.38212	6.22994	5.33936	5.2839	5.4912	5.88069	5.89019	5.39048	6.01755	5.82546	6.04208	5.74906	6.08245	5.28701	5.79115	5.56178	5.51226	5.66132	5.41071	4.28039	4.80075	5.04605	4.6359	4.50918	4.42958	5.8008	4.95421	5.37671	5.7519	5.53747	5.14694	5.62151
ABCG2	5.08364	5.12344	3.90751	5.48228	5.4224	5.11098	3.62865	3.46389	4.29346	5.07724	4.81512	6.4078	6.12372	5.2011	4.22064	5.8008	5.38978	4.3841	5.32492	5.07928	5.73999	5.41544	5.26197	5.35565	1.98427	4.73772	5.87401	4.68689	5.27353	4.89954	4.80278	5.80979	6.25228	6.40555	5.99256	6.19737	5.48725	6.13397	5.84337	6.19668	6.11448	5.88402	6.25028	5.92249	5.40916	5.50384	5.57765	7.1127	4.77651
ABCG4	3.93109	4.73452	0.889048	4.09647	3.89762	1.99885	4.78656	4.44927	3.77154	3.82756	4.7086	1.38213	4.1339	2.21143	4.8139	1.8812	4.30087	4.29692	4.96666	2.26815	4.60027	4.31052	4.92501	4.12724	1.80266	5.94253	4.34883	4.8637	2.45581	5.59514	2.3308	5.42132	2.11544	4.49477	1.60287	4.85565	3.86711	5.15564	3.4928	5.08835	1.6402	5.18645	1.10626	5.17425	1.24503	4.16012	3.27939	3.7752	3.47536
ABCG5	3.37282	2.29861	0.948777	0.940008	0.895572	0.917137	0.91154	0.943918	0.221417	0.178667	0.970742	0.147238	0.968856	3.18748	1.63259	1.02623	0.257081	0.383943	3.07772	1.55417	1.15474	0.0103481	3.46389	0.615581	1.47227	1.14851	1.33036	1.50224	1.67033	1.19586	0.937905	1.3043	0.209555	0.814386	0.244151	0.3892	0.16796	0.641642	0.355729	0.521237	2.93445	0.118359	0.663048	0.949365	1.23975	1.07623	0.374236	1.32198	1.0554
ABCG8	1.72923	1.68697	1.7765	1.78589	1.71493	1.71838	1.71493	1.73093	1.14373	1.74266	0.842638	0.332751	1.42445	0.690195	1.14955	1.0368	1.61404	1.17234	0.939373	0.22318	0.943244	0.837276	0.922354	1.69262	1.05911	1.28789	1.11369	1.09866	1.29557	1.15474	1.09433	1.74558	1.82669	1.9244	1.52128	0.560562	0.817119	2.71343	1.62736	1.80985	2.18148	1.22758	2.13444	1.84388	0.699652	1.81584	1.10177	1.31896	1.49969
ABHD1	5.46702	4.2939	4.92662	5.55108	4.88604	4.48172	4.33116	4.47278	4.68975	5.02713	5.3119	4.8374	4.20935	4.50956	4.37355	4.78959	4.69401	4.91172	5.08003	4.82489	2.25519	5.41507	4.62042	5.2403	5.08835	5.62856	4.98787	4.19253	4.86829	5.80178	5.14219	4.37399	5.01551	4.81052	4.93753	4.49182	5.00643	4.2829	5.30573	4.46821	4.48172	5.12537	5.18154	4.64196	5.05814	5.20852	4.45552	4.79253	4.52233
ABHD10	8.41778	8.14643	7.927	8.38296	7.77266	7.98505	8.25003	8.19567	8.5367	8.41246	8.01418	7.51325	7.93686	7.70784	7.50278	7.7819	8.38191	8.26763	8.52207	7.77869	8.11709	7.75363	7.90841	7.86288	7.81481	8.0421	8.15237	7.63685	7.79031	8.1096	7.71794	7.48412	7.47698	8.13623	8.14891	7.65187	8.31848	8.3309	8.12795	8.12713	7.77003	8.1758	8.18223	8.07823	8.07066	8.02824	8.05824	8.04787	7.57297
ABHD11	5.12069	4.85855	5.68933	5.51966	5.17768	5.36524	4.89754	5.13835	4.93478	5.17657	5.66929	5.35675	4.81839	5.85124	5.29084	5.17731	5.51484	5.25004	4.59703	4.41078	5.43394	4.82648	4.96666	4.945	4.70941	5.91129	5.98606	4.39863	5.24409	5.08478	5.12033	5.59585	5.74554	5.98781	5.94323	5.83789	5.96623	5.56461	5.49824	5.8046	5.23427	5.99711	5.78004	5.95164	5.73506	5.50578	5.64298	5.79008	4.65652
ABHD12	4.13979	5.1641	5.23005	5.32181	5.88673	5.52571	5.07145	5.48298	6.11483	5.84091	5.57804	5.6605	5.45155	5.33114	4.68689	6.22929	5.92219	5.62044	6.04208	5.69518	5.49424	5.48365	5.74481	5.66896	5.23954	5.90656	5.71272	5.16636	5.17768	6.04208	6.27165	6.1233	5.07107	6.11557	5.78105	6.52539	5.22591	5.76538	5.21353	6.1505	5.77577	6.39438	5.51113	6.51523	5.8658	6.4878	6.5558	5.56063	5.41739
ABHD13	5.29802	4.94251	5.36417	4.02091	5.33187	4.67602	5.47939	4.5712	5.96546	5.19161	5.1684	5.19751	5.69415	4.91833	5.10194	4.3126	3.40121	5.31293	5.61903	4.78483	5.17227	5.07566	5.87744	5.24409	4.72214	4.82606	5.0726	5.6616	5.52215	5.06783	5.41071	5.19342	5.58667	4.78186	5.03519	5.28466	5.12069	5.52252	5.03852	4.47796	4.53172	4.92147	5.46349	4.67932	4.77172	4.83002	4.47796	5.10395	4.98826
ABHD14A	7.35803	7.05714	7.98665	7.57297	7.25071	6.81231	6.7497	6.67714	7.40523	6.99404	7.47084	7.50165	7.39303	6.92931	6.43774	7.52312	7.43065	7.78124	7.77535	7.15171	6.86998	7.0367	7.21081	7.66781	7.51325	7.41164	7.57184	7.20521	7.08347	7.42517	7.21585	7.50506	7.14462	7.20775	7.59329	7.08983	7.15708	7.64124	6.93773	7.11872	7.10518	7.55636	7.56099	7.64803	6.70386	7.50568	6.02626	7.14599	7.26591
ABHD14B	1.91127	4.62609	4.9492	0.921596	2.74839	4.13242	2.52928	2.08701	4.46349	4.31864	4.65533	4.71365	4.75124	3.99057	4.33203	3.97174	3.21479	4.87213	3.99972	3.33513	4.05493	4.77475	3.78932	3.08407	3.96788	4.98787	4.82276	3.60217	3.7879	4.72799	3.20664	3.93004	5.4045	5.20677	3.94904	4.62299	5.56216	4.6798	3.81496	5.82762	4.30087	5.81329	5.34164	5.72701	4.48047	5.62151	4.86503	4.69575	4.41546
ABHD15	5.0682	5.00277	5.55548	5.85195	5.18487	5.46235	5.45752	5.57332	5.46925	5.10912	5.70473	4.58699	4.36575	4.80035	3.63373	5.25166	6.78076	5.05735	5.25466	4.94251	3.51029	4.99719	6.04804	5.07361	3.65531	4.82412	4.37883	5.49899	4.23418	5.80642	5.50946	5.54275	5.1519	5.23228	4.74208	4.46947	4.53685	4.67208	3.82066	5.37784	4.69228	4.36216	3.99212	5.46349	5.46159	5.29195	5.47654	4.67644	4.52018
ABHD16A	5.23918	5.96146	6.28334	5.99815	5.80141	6.0818	5.88258	6.40941	5.88183	6.68792	5.8372	5.57804	6.81853	5.86439	6.86917	5.92954	5.87143	5.87923	6.46995	6.04175	6.27056	5.29195	6.83537	5.86813	6.47682	6.86521	6.41274	5.72147	6.474	5.36819	6.11673	5.88635	5.49745	6.01172	6.0857	6.85468	5.7299	6.34572	5.87324	6.13432	5.74033	6.5918	5.7299	6.63286	6.04208	6.3198	6.00718	5.90057	6.14165
ABHD16B	0.15298	0.131626	0.15764	0.169861	0.158918	0.160169	0.150803	0.153998	4.52366	4.8857	4.57545	4.33157	4.50228	1.82523	1.346	1.26102	1.50071	1.39365	1.28047	1.34278	1.2967	1.31231	1.2748	1.53672	1.83106	0.0808639	-0.0879038	0.68801	1.28895	0.190201	0.0685046	1.18764	1.19276	1.69502	1.50747	1.91127	1.40645	1.56611	1.29169	1.34121	1.52187	1.27632	1.28742	1.26963	1.43831	1.46298	4.10957	4.57806	4.20618
ABHD2	6.2627	6.06481	6.36738	6.66702	6.88542	6.52988	6.41645	6.7122	6.45384	6.57972	6.24369	5.89398	6.28334	6.89736	7.10325	6.52701	6.04578	5.51298	5.43537	6.17581	6.4442	6.76178	6.6706	6.06665	6.59135	6.74435	5.67727	7.22105	7.17355	6.29464	7.18212	6.37538	6.75506	6.74144	6.42487	7.14768	6.1523	6.86207	6.71564	6.35805	6.97881	6.87574	6.48925	6.28756	6.80817	6.86251	6.77562	6.36702	6.5538
ABHD3	5.26655	5.55652	4.92382	5.41775	5.17657	4.54547	4.45101	4.61614	4.63632	5.16636	4.9363	4.82648	5.25894	4.62564	4.9746	5.16377	5.73462	5.05409	5.63054	6.26121	5.93196	5.30352	5.76426	4.18166	5.24297	4.38284	5.01465	5.33896	4.45646	4.60027	4.85041	5.22741	5.26766	4.42775	4.37128	5.22369	5.03356	4.16441	4.92382	4.90583	5.15483	4.93709	5.49866	5.63364	4.77434	5.1995	5.80912	5.20892	6.2657
ABHD4	6.3046	6.03743	6.13472	6.29501	5.70694	6.36215	6.0157	6.1089	5.82695	5.80141	6.73719	6.10922	6.90177	5.84659	6.22709	5.54055	4.92418	6.27243	5.57656	6.27919	6.07028	6.42526	6.13881	6.11781	5.62955	6.24032	6.2047	7.15413	6.06441	6.22561	6.1747	6.11633	5.75533	6.45047	6.53028	6.63127	6.17934	6.18111	6.21677	6.26415	6.16727	6.57561	5.93271	6.20064	6.17247	6.72657	5.30469	5.86039	6.09363
ABHD5	6.34809	6.35454	6.57441	6.43814	6.31549	6.51402	6.78218	6.65903	6.23294	6.31739	6.15084	6.32824	6.24571	6.71391	6.5089	6.95672	6.06626	6.37459	6.01136	6.2055	6.39965	6.54752	6.5164	6.62015	6.5582	6.58978	6.17794	6.42673	6.35097	6.35382	6.87218	6.49851	5.87923	5.76538	6.25752	6.3503	6.10818	6.05778	6.27132	5.90541	6.11633	5.96849	6.27883	6.06704	6.05565	6.26121	6.06228	6.58943	6.41938
ABHD6	4.59543	4.54984	5.02535	4.52902	4.414	5.12728	5.25324	4.88686	4.39123	5.02628	5.15638	5.15111	5.06344	4.61517	4.95382	4.53512	4.98618	5.12962	4.91915	5.10235	5.24784	4.61918	5.28052	4.76921	5.05298	4.54211	4.59543	4.89361	4.54944	5.69453	4.39953	5.18443	4.50117	4.08038	4.63112	4.3527	4.87213	4.21359	4.57199	4.45101	5.03678	5.17067	4.63021	3.85478	4.74261	5.12619	4.11416	5.01354	4.66706
ABHD8	1.2472	4.29475	1.30103	1.30103	1.25831	2.56272	1.25995	1.27529	2.90387	3.29749	2.66284	3.01422	2.62852	3.05563	1.42185	4.18166	0.470086	3.20317	2.86157	3.2895	1.80008	1.52187	0.411293	0.194539	0.792133	3.012	3.41004	3.52633	1.57509	3.52312	3.3854	3.90422	3.54485	4.5437	1.17116	3.85426	3.44376	1.457	1.80728	4.50956	4.66229	0.421573	3.21857	4.70599	1.60993	1.6286	2.38136	2.10012	1.19814
ABI1	6.58367	6.45249	6.23478	6.51119	6.46188	6.3542	6.40854	6.27535	6.11517	6.27658	6.65573	6.57729	6.885	6.69594	6.24646	6.24032	6.69594	6.42561	6.2619	6.4336	6.78076	6.28101	6.33321	6.26051	6.65737	6.46034	6.19808	6.4683	6.26679	5.90298	6.61485	6.36484	6.55304	6.87574	6.5246	6.79511	6.31248	6.71741	6.45314	6.78878	6.50292	6.476	6.37335	6.51924	6.17102	6.37251	6.38173	6.57696	6.5231
ABI2	7.03482	7.47259	6.64804	7.2556	7.04815	7.2237	7.46016	7.01252	7.09318	7.14811	6.99223	7.20025	7.54273	7.29321	7.08434	7.05765	6.81494	7.22326	6.89341	7.10939	6.7559	6.78172	6.54912	7.09981	6.60622	7.01772	7.20875	6.56988	6.76905	7.22817	6.78076	7.45359	7.37826	7.30124	7.32589	7.44594	7.22622	7.00927	7.50278	7.06736	7.61867	7.48412	7.3638	7.28619	7.21164	7.11684	7.57477	7.39658	6.35303
ABI3	5.58222	5.06981	5.54766	6.04761	5.16753	5.25753	4.5066	5.14337	6.09628	6.18867	5.25829	6.14758	5.53017	6.14246	6.14246	5.94943	6.01908	5.0484	5.50124	5.21828	6.37771	6.00542	5.95275	5.46463	5.92598	6.67352	4.99678	5.71339	6.28173	4.32556	5.57946	5.07323	4.57079	5.92461	6.03492	6.23185	5.35127	6.37574	5.18193	5.88744	6.5307	5.61506	4.85041	5.73246	5.85405	4.68269	6.30565	5.45334	6.43159
ABI3BP	6.22283	5.93418	6.79417	6.67517	5.79185	5.01241	6.25601	5.20184	5.21469	6.06522	7.00661	5.08399	5.74738	5.64334	5.53747	5.90691	5.32453	5.15483	5.3756	6.26345	7.19524	5.40049	5.89992	5.70001	6.82116	6.13768	5.69964	5.55224	5.4674	5.50871	5.42132	5.36271	7.53786	6.70974	5.58334	6.36484	6.59135	6.74888	5.94363	6.68037	6.53426	7.30338	6.26378	7.43922	7.16756	7.1848	6.69464	6.8956	8.1063
ABL1	6.58978	6.83934	6.77831	6.75833	6.89082	6.87306	6.64528	6.57066	7.09929	6.97691	7.30786	6.33321	6.99747	6.80041	6.71065	6.48019	6.51286	6.56178	6.46466	7.20722	6.86744	6.87841	7.18095	7.35528	7.54496	7.05465	6.90605	7.20124	7.17406	6.74847	7.137	6.50578	6.53307	7.05952	6.58582	6.92338	6.72525	6.82232	6.79511	7.30898	6.69341	7.19572	6.61681	6.86657	6.99089	7.05049	7.4782	6.77113	6.89869
ABL2	4.97107	4.42034	4.63632	4.34389	5.17106	4.72214	4.88811	4.74155	4.68142	4.87813	4.63808	4.78917	5.04571	4.94297	5.42203	4.59659	5.26833	4.42125	4.82276	4.68604	5.09663	4.84954	5.17025	4.54211	5.05935	4.6157	4.72086	5.61968	4.58699	4.50154	4.70983	4.49058	4.14802	4.07992	4.47418	4.85855	4.06642	4.55151	4.49776	5.03977	4.32372	5.04801	4.76301	4.74873	4.39817	4.84954	4.26399	4.57499	5.29969
ABLIM1	9.51084	9.73004	9.35705	9.87315	10.0483	10.0957	10.1118	10.0608	9.48268	9.53148	10.1611	9.55097	10.2764	9.46967	9.34745	9.2834	9.44781	9.68752	9.32997	9.57418	9.65526	9.38977	9.89841	9.90885	9.43361	9.48268	10.4835	10.03	9.64983	9.50519	9.60248	9.78962	9.54362	9.87315	9.91939	9.53869	10.0002	9.96827	10.0766	9.5945	9.79291	9.86316	9.98269	10.0957	10.1866	10.1698	9.45981	9.98953	9.26973
ABLIM2	5.42413	4.92382	5.31293	5.13564	4.60612	5.18985	5.00889	4.80075	5.17468	5.08835	5.12256	5.56535	5.25753	5.0188	6.1628	4.22248	5.32565	4.91869	4.90624	4.87739	5.83214	4.87487	5.16798	4.91833	4.51846	6.24337	4.90545	4.94546	5.269	5.08916	5.46925	5.09857	4.39261	5.3315	4.83784	5.31158	4.7996	5.20998	4.44217	5.08871	4.71365	4.98986	4.53995	4.94965	5.44118	4.57806	4.29824	5.6208	4.8285
ABLIM3	7.27457	7.95624	7.45542	7.48528	7.73311	7.79584	8.00245	7.96949	7.09456	7.68204	8.02653	7.34655	7.20368	7.11779	7.03859	6.91002	7.70383	7.42288	7.46016	7.23371	7.38921	6.62104	7.9069	7.37298	7.34271	7.25503	7.73378	7.11732	7.10083	8.18958	7.08434	7.78966	7.35972	7.50043	7.8363	7.63754	7.9018	7.91575	7.73104	7.46733	7.57922	7.91806	8.1063	8.05913	7.50391	7.39891	7.39891	7.26185	7.92345
ABO	4.48336	2.08596	4.12282	4.6157	1.05169	4.44398	4.25022	4.06452	1.48368	2.63206	4.30668	3.68799	2.77504	2.87775	4.26182	3.66204	4.1706	2.13138	3.96652	2.20117	3.82855	3.18922	4.45503	3.3791	4.14304	4.24373	4.32117	3.82011	2.76137	4.11923	4.17997	3.19893	1.18528	1.65358	3.69397	3.50516	2.31222	4.91671	2.83986	4.08546	3.38706	4.13719	3.34493	5.04495	2.68955	4.66662	3.5349	4.13848	4.05315
ABR	6.8034	6.62669	6.84493	6.65903	7.14113	6.78549	6.83124	6.71606	7.17848	6.70804	6.9622	6.77786	7.15708	5.74554	6.10628	6.64734	6.70185	6.81408	7.14502	6.65615	6.34691	6.29422	6.85992	6.88369	6.82157	6.65445	7.13745	6.54675	6.21635	6.94989	6.32091	7.03336	6.98804	6.90268	6.45791	6.64051	6.5246	6.70646	6.79199	6.71391	6.6739	6.83886	7.03859	7.14113	6.885	6.87442	6.46147	6.73928	6.26866
ABRA	8.19668	6.85088	6.65657	7.11034	7.18426	6.26378	6.26121	6.476	6.9426	8.81755	6.03594	6.61881	6.04391	8.83627	8.78519	7.25503	6.67992	6.70068	6.97046	8.54145	8.69079	8.08666	8.36821	8.21475	9.09421	7.98107	6.18801	7.81405	8.36821	7.35696	9.96467	7.81481	5.91204	7.09224	5.38503	6.39657	6.16016	6.8913	6.96585	7.21216	6.84704	6.30527	6.14979	6.31859	6.15084	6.27919	8.03923	6.98245	5.11328
ABT1	5.11659	4.85175	5.97951	4.85386	5.41544	5.46854	5.17347	5.28858	5.22249	5.93094	6.21277	5.88918	5.66132	5.71651	5.40553	5.50237	5.93455	5.88603	6.1823	5.44661	5.74842	5.63127	5.18078	6.10666	6.24535	5.64219	4.60778	6.18867	5.42921	5.75045	6.00404	5.88951	5.68319	5.58636	5.41178	5.1731	5.74876	5.35127	5.49705	5.10507	5.75371	5.43894	5.61325	3.00865	5.92146	5.84659	4.86586	5.49013	5.13794
ABTB1	3.1163	4.18256	3.58543	3.04481	3.86711	4.3833	4.37176	4.09319	3.55623	3.7654	4.40889	3.56731	3.81304	3.72353	3.62917	2.78549	4.03451	4.04542	5.11843	4.20122	4.26963	4.46435	4.12954	4.36529	5.33723	4.22873	4.65029	3.92171	3.30801	4.82606	3.92171	4.61656	4.64051	3.65326	5.28206	4.03317	4.43744	4.5625	4.69978	3.96135	4.68358	4.16106	4.24517	3.87796	5.21828	3.97355	5.84266	4.35062	4.42731
ABTB2	5.6063	4.98414	5.23388	4.65976	5.28815	5.04326	5.68279	5.37156	5.18004	5.15896	6.59524	5.62609	4.72172	5.6401	5.43065	5.39722	4.42775	6.03243	5.35309	5.02114	5.30312	5.28627	4.49619	5.44464	4.05963	6.25228	4.88604	5.20035	5.81924	6.25936	5.70836	5.17927	4.79513	6.21479	5.41033	5.97306	6.35533	6.13331	5.07566	6.14463	5.56893	6.60666	6.09186	5.61506	5.82263	5.74277	5.19304	6.34077	5.14219
ACAA1	7.90918	8.3459	8.46601	7.92909	8.19668	7.89902	7.8508	8.49442	8.23709	8.18414	8.63772	8.39524	7.64562	8.06993	8.29193	7.85508	8.05756	8.30038	8.06253	7.81771	8.27975	7.77612	8.04146	8.47653	7.86717	8.26682	8.54774	7.98028	8.25003	8.21475	8.38681	8.00557	7.72592	7.98422	8.5367	8.19486	8.44807	8.48641	8.36108	8.01418	8.093	7.8363	8.4035	8.50649	8.58372	8.73357	7.80726	7.97869	7.44647
ACAA2	8.50649	8.13299	7.71595	8.53056	8.18958	8.80594	8.75913	8.61226	7.79431	8.31935	8.18958	8.41169	7.53539	8.88459	8.61475	8.42745	8.52915	8.38008	8.10204	8.26763	8.27888	8.74724	8.91888	7.96095	8.31935	8.05592	7.80188	8.21085	8.65692	8.28058	8.65305	8.85322	7.69361	7.38863	8.67371	7.94775	8.37122	7.97637	8.16031	7.71528	8.16107	7.47417	8.24163	7.70902	8.29849	8.11636	7.27938	7.85581	8.23513
ACACA	5.02829	3.01352	1.87371	1.9024	4.67802	2.49528	5.24446	5.2359	1.75244	2.06635	3.47271	4.09501	4.27044	4.2189	3.40063	3.7127	3.29749	2.92474	2.1597	3.92637	1.54522	2.39192	3.68449	4.70983	4.29735	2.81341	3.8097	4.17014	3.01127	5.39536	3.17686	4.48172	3.32237	3.64109	4.55188	3.4981	3.37688	-0.0606992	3.96087	3.89852	3.84274	3.63326	4.46572	3.51687	4.68689	3.00161	5.30537	4.5789	4.32506
ACACB	7.00973	7.94775	6.8913	7.13049	7.08648	7.36188	7.72883	7.35254	7.42799	6.90953	7.28258	6.8363	6.9324	7.18046	6.53102	7.12406	7.66906	7.58731	7.29204	6.27243	6.45093	7.67375	7.62992	7.15124	6.2845	6.36669	6.72036	6.83405	6.89785	7.69491	7.12758	7.12454	7.20675	6.66237	7.31632	6.36556	7.25662	7.19619	7.16856	6.4563	7.06781	6.68162	7.34327	6.7122	7.05518	7.23273	7.57297	6.66157	6.63452
ACAD10	2.24198	2.17134	2.24418	2.30605	3.05909	2.16913	3.65694	5.03356	0.474211	1.95354	3.29749	1.5815	1.52024	3.2167	0.670605	1.78331	2.44523	2.21896	0.596175	1.80141	1.93328	1.97684	1.3128	2.11338	1.99805	1.87229	3.73497	2.07943	1.40524	1.98763	2.94564	3.43606	2.22254	3.03819	2.85228	2.12556	2.72939	3.76592	2.37755	2.61612	1.72923	2.87919	3.00578	2.80027	3.1163	3.34995	-0.0922075	3.66514	1.7752
ACAD8	7.04381	7.29145	6.93456	7.24482	7.32322	7.61544	7.65632	7.28518	7.3819	7.00837	7.62608	7.80261	7.08936	7.41338	7.33492	7.4505	7.45892	7.27665	7.46788	6.57477	6.87518	6.95855	7.09557	7.15171	6.69852	7.45359	7.57238	6.82779	6.80687	7.16856	6.98661	7.60858	7.2481	7.89449	7.67946	7.8053	7.78665	8.05197	7.93446	8.00557	7.39471	7.70585	7.5139	7.6526	7.50444	7.84602	7.67178	7.73773	6.52539
ACAD9	6.93289	7.35362	7.10274	7.05856	6.67108	7.65384	7.08936	6.90177	6.94709	7.15073	6.88458	6.99136	6.6922	7.21322	6.87306	7.06688	7.0787	6.8708	6.55855	6.28941	6.20211	7.09929	7.26444	6.55272	7.04336	7.02249	7.29204	6.63493	7.19982	7.05049	7.01164	6.9288	6.67758	6.86607	6.52083	6.76773	7.06919	7.25007	6.64651	7.02202	6.62423	7.01164	7.2237	7.3107	6.46434	7.02518	6.46995	6.82191	6.28293
ACADL	3.87371	3.33159	4.84876	3.73652	4.38024	4.22433	3.0947	3.96833	3.17929	4.3727	2.94494	4.00977	4.21359	4.46703	3.53902	3.89606	2.7456	3.11758	3.65222	3.55729	3.85087	4.38994	4.78354	3.99259	3.66984	3.48054	3.75648	3.49119	3.68896	5.04289	2.92105	5.37525	4.28643	4.06642	4.28416	4.92038	2.87462	2.58624	3.40644	3.84326	4.75784	4.92963	3.51029	4.48719	3.36777	3.87512	4.3269	4.38241	3.97083
ACADM	10.7374	10.5119	10.6979	10.5543	10.1575	10.1825	10.5237	10.4725	10.3646	10.1825	10.9509	10.3696	10.271	10.5479	10.1278	9.96467	10.0257	10.222	10.2257	9.84163	10.2527	10.3943	10.5119	10.3052	10.124	9.94798	10.6084	10.3011	10.3382	10.5237	10.5889	10.6333	9.96827	10.4351	10.399	10.7685	10.627	10.8915	10.3537	10.595	10.4616	10.7958	10.4951	10.691	10.069	10.7374	10.073	10.4668	10.1083
ACADS	6.84226	6.88542	6.90313	6.93018	6.70974	6.71998	6.89376	6.6641	6.77152	7.25071	7.47984	7.11133	7.02432	7.14061	7.17996	6.3526	6.95544	6.97563	7.86796	6.77152	7.59767	7.25388	7.55922	6.85849	7.18375	7.56041	7.07552	6.86389	7.36141	6.89082	7.36957	7.21164	5.94437	6.74484	6.41061	7.05285	7.12556	6.97967	7.12505	7.16203	6.91585	6.82646	6.85369	7.0706	6.73391	7.48699	6.25415	7.32429	6.29749
ACADSB	8.09072	8.26868	8.15507	8.02053	8.20246	8.41778	8.25501	8.2334	8.11287	8.08747	8.194	7.93765	8.57707	8.14818	7.9741	7.85231	8.16186	7.87967	7.99446	8.19668	7.98343	7.78883	7.50221	8.23972	7.49827	7.92108	8.89576	7.67762	8.03673	7.83843	8.07916	8.07398	7.64238	7.89902	8.38875	8.01653	8.31194	8.06929	8.02909	7.40584	8.45139	8.37715	8.63772	8.52009	7.74963	7.87092	7.65632	8.16107	7.11527
ACADVL	10.2302	9.84163	9.56435	10.1442	10.0069	10.1961	10.0957	10.0802	9.73935	10.384	10.399	10.0766	8.76992	9.8666	9.55614	9.53869	10.1866	10.178	9.85368	10.0994	10.4351	10.1866	10.8475	10.3095	9.94102	10.4835	9.77595	9.99613	10.2764	10.0031	10.3095	10.1653	9.80821	10.1083	10.2039	9.76719	10.5421	10.4242	10.1961	10.0139	9.51889	9.6205	9.87315	9.22195	9.85077	10.1653	9.9445	9.68752	9.70838
ACAN	4.03792	3.75408	4.1808	4.18478	3.8018	3.49863	3.91038	3.29235	4.75047	4.46947	3.92675	4.18121	4.014	4.8569	4.17997	4.84432	4.33203	3.937	3.87796	3.86666	3.3372	4.5886	3.34183	4.32977	4.09501	4.47185	3.87841	4.55275	4.58412	4.05545	4.38107	4.70233	3.72515	5.07843	4.15611	4.10301	4.34749	4.57715	4.16575	4.13103	4.75085	4.76301	4.39209	4.92699	4.37176	5.27419	3.68606	4.06254	4.08176
ACAP2	5.71615	6.00442	5.94109	5.75873	6.15601	5.66581	5.64781	5.82867	5.56852	5.8333	5.80742	6.0768	6.112	5.39613	5.7785	5.96657	5.27312	5.67305	5.6503	5.69002	5.98815	6.02523	5.97481	5.61791	5.52475	5.53453	6.00579	5.37671	5.55368	5.93235	5.5977	5.37671	6.18345	5.7386	5.55584	6.24646	5.99674	5.58376	6.15265	6.15601	6.24074	5.89228	5.69667	5.84873	5.77494	5.63399	5.59095	5.88533	6.21557
ACAP3	3.11454	4.85606	5.14694	0.940641	4.0919	5.06858	3.79882	3.93558	5.49424	4.94674	3.90373	3.96893	3.97458	4.45948	0.828214	5.28661	3.25131	5.63654	4.93153	5.31719	4.41032	4.01998	3.56356	5.36562	3.91175	4.70599	4.97822	4.74425	5.09896	5.28545	5.18443	4.73891	4.73891	4.83495	4.81097	5.13914	4.69482	6.22406	3.99498	5.85539	4.80446	4.35445	4.51668	3.31343	4.48719	6.07108	5.85976	5.14815	3.50402
ACAT1	9.50798	9.63141	9.57704	9.74477	9.84467	9.79529	10.1611	9.85368	9.81976	9.60734	9.76138	9.71423	9.68752	9.52397	9.56151	9.3185	9.82898	9.79529	9.90458	9.37789	9.6178	9.55614	9.71124	9.67194	9.74477	9.37048	9.9157	9.43862	9.43593	9.31591	9.59239	9.89524	9.34339	9.66038	9.69054	9.07098	9.93001	9.79291	10.0994	9.89841	9.48485	9.35929	9.88267	9.50798	9.57135	9.52858	9.27869	9.68521	8.90362
ACAT2	5.37156	5.18845	5.46995	5.37815	5.76046	5.18116	5.34275	4.93324	5.58667	5.73353	5.72404	6.16884	6.3477	4.61918	4.48374	5.67032	6.18002	5.8046	5.67727	6.03701	5.38464	5.59908	5.11016	6.54834	5.70986	5.61576	5.52215	5.25279	5.78661	5.9422	6.21201	5.9766	5.66965	5.69453	5.64402	5.81437	5.81581	5.75152	5.84266	5.3571	5.82801	5.78799	5.70766	5.66332	5.57695	5.57729	5.41996	5.70294	5.62044
ACBD3	7.41567	7.95089	7.6526	7.12758	7.68283	7.64173	7.77207	7.68074	7.84794	7.36141	7.91049	7.74256	7.9112	7.81695	7.97326	7.36842	7.41164	7.44086	7.59268	7.14811	7.39471	7.17305	7.55807	7.89591	7.91184	7.87593	7.64562	7.63617	7.43507	7.18212	7.21478	7.42517	8.02514	7.71728	7.67762	7.59523	7.54732	7.37447	7.64987	7.67496	7.73512	7.50695	7.47533	7.65557	7.75298	7.31188	7.53106	7.50818	7.33371
ACBD4	2.75795	0.534869	5.56852	5.53124	3.16557	4.9396	3.55832	3.37628	5.2434	3.7938	4.00704	4.43665	4.53075	1.36853	3.22538	4.71365	3.64723	3.7381	5.71301	5.11211	4.32786	5.34054	3.31398	4.96494	5.45263	4.06874	4.37355	4.43532	4.34609	5.32529	4.13587	5.67068	5.08399	4.06162	5.72007	5.15483	4.82964	1.15474	3.52838	5.32994	5.59027	4.17618	5.37229	5.32631	4.62817	4.51969	4.93437	4.53463	5.08043
ACBD5	8.48109	8.3791	8.38097	8.45349	8.11445	8.52439	8.5606	8.14557	8.26949	8.2872	8.45577	8.21545	8.92556	7.6318	7.56156	8.26949	8.43722	8.67371	7.95016	8.15685	7.76942	8.66709	8.12554	8.61842	7.14317	7.54047	8.26763	8.45349	8.2069	8.27614	8.1995	8.58134	8.30699	8.1063	8.34384	7.69305	8.46131	8.02053	8.38582	7.92345	8.51435	7.69042	8.52105	8.35371	8.31935	8.46811	7.64489	8.25106	7.58294
ACBD6	6.31509	6.1523	6.80604	5.96849	6.51607	6.5918	6.26679	6.34954	5.97625	6.68917	6.29972	6.21277	6.12084	6.10203	6.05165	6.59966	6.47831	6.31549	5.88918	5.75972	5.48162	5.17146	5.84592	6.47357	6.22026	6.40002	6.17829	6.14831	6.6852	6.57192	6.27347	6.22994	6.23254	6.2849	6.08837	6.53932	6.2395	6.48059	6.44342	6.27844	6.20391	6.30047	6.30272	6.45954	6.14979	6.29019	6.65006	6.20172	5.88635
ACCS	3.0106	5.87744	4.99951	3.49053	4.01068	4.26915	3.66728	5.37994	3.59889	3.93151	4.0002	4.20483	4.2474	1.51373	3.4183	2.0817	6.39366	2.75087	5.27972	3.03267	3.4411	2.61711	3.0771	5.37815	3.49507	3.54115	4.35359	1.54868	3.39908	4.74471	2.78549	3.67903	5.85943	5.99034	1.50633	4.78734	5.51226	5.3431	5.23884	2.69616	2.86712	3.14934	4.52989	4.17396	3.23065	4.26399	5.02903	4.1339	4.03931
ACD	1.84857	6.06084	6.11162	1.52076	5.40954	5.45752	5.3119	5.0044	2.66107	3.97506	4.06254	4.50956	3.58477	2.81894	3.87371	3.2895	3.54272	3.42935	4.45858	4.94207	3.73763	2.42509	0.720216	4.26797	4.47278	3.89653	3.54957	3.88903	3.73604	3.50916	3.70946	3.33948	4.71634	4.57585	3.91369	4.58193	2.82221	4.67802	3.53553	3.85732	4.38638	2.21386	4.81012	3.85531	3.19653	1.62211	3.35405	4.05738	4.35312
ACE	4.01689	4.61136	4.60153	4.48374	4.17109	3.64061	2.49528	3.65785	3.37628	3.95139	4.26447	3.12744	4.1706	3.31222	2.76844	5.19788	3.23802	3.11454	5.86259	4.15206	4.24151	1.87154	3.04422	5.0232	1.84454	4.89914	4.66314	3.89653	3.8468	3.99683	3.78266	4.19984	4.93671	5.32994	5.36205	3.83112	4.42696	3.38022	4.38107	4.44086	4.19454	4.31349	4.36263	4.76628	2.6132	3.25849	3.72154	4.20748	3.77257
ACE2	6.44691	6.5021	5.6239	5.68319	6.14577	5.87067	6.09772	6.16501	6.19418	6.33321	7.14969	8.38981	5.29461	6.60412	6.36782	7.75855	6.47517	6.25306	6.11087	6.29825	6.2102	5.98921	6.42858	6.22782	5.79359	6.47724	6.46622	5.09467	6.46542	6.17208	6.31434	7.70724	8.1096	8.43261	7.53655	9.24332	6.30636	6.4012	6.18867	6.98197	7.83769	7.70248	6.58706	6.96672	7.91958	6.91495	8.99872	7.86158	6.72401
ACER1	1.25567	1.22815	1.31002	1.31002	1.26517	2.79292	2.46951	1.28268	0.696546	0.891159	0.234642	0.626304	0.332751	1.12716	1.0504	2.52396	0.998206	0.329348	0.470086	0.981917	0.534869	1.10287	1.10348	0.0253627	1.71014	0.573518	1.97788	1.92514	1.35813	0.920135	1.46753	1.59472	0.644034	1.42889	1.20615	1.31838	1.17176	1.3886	1.44734	1.17234	1.22637	0.282647	1.37423	1.32784	0.397895	1.61187	0.251406	-0.999504	0.586175
ACER2	3.80528	5.153	3.35516	4.06546	4.9484	3.20959	4.36398	3.66561	3.70215	4.10817	3.72566	4.11664	4.92662	4.44217	4.74062	4.13678	3.93245	2.06439	4.47642	4.45143	4.84683	4.84351	4.62771	4.15156	3.43172	3.78421	4.91387	4.83576	4.2658	4.10173	4.86331	4.88137	4.74471	4.40845	4.89361	4.84722	4.33203	3.43055	4.86288	4.98171	4.0923	3.99305	4.3833	3.20387	4.96033	4.84835	3.26619	4.33203	4.47236
ACER3	5.32261	4.95501	5.21977	5.34897	5.60973	5.77307	5.51014	5.58222	4.97144	5.12217	5.27281	5.26383	5.56105	5.55964	5.56283	5.89565	5.21353	5.56357	5.27932	6.09186	5.74347	5.45334	5.32421	5.5808	5.41996	5.37751	5.38315	5.31087	5.43576	4.95948	5.44225	4.89245	5.26307	4.69623	5.36055	5.17657	5.26938	5.13187	5.30537	4.70765	5.27019	4.86916	5.22512	4.85345	4.81052	4.99438	4.93279	5.61903	5.08955
ACHE	1.73503	1.68924	1.78086	1.791	1.71782	1.72201	1.71838	1.73392	1.61352	1.71729	0.864366	1.03091	1.17575	1.58474	0.913584	1.05407	2.12556	0.87823	1.50021	1.62393	1.62211	1.30369	1.02955	1.00511	1.3371	1.16769	2.18148	1.80008	1.73564	2.56188	1.59947	2.36785	1.35869	1.86549	1.44325	1.43831	0.519537	1.43169	1.43559	2.01337	1.65661	1.28847	1.30489	1.51855	0.272633	2.4617	0.988784	0.503243	1.31341
ACIN1	5.07323	5.73652	5.17812	5.09663	5.66929	5.62282	5.56429	5.72147	5.77577	6.05279	5.78452	5.73312	5.58561	6.13692	5.65873	5.7782	5.82405	6.14902	5.67801	5.06858	5.84592	4.7525	6.61527	5.70403	5.51518	5.34861	5.20258	5.72736	5.38762	5.74977	5.64707	5.87143	5.59243	6.07151	6.19527	6.1823	6.09628	6.33585	5.90579	6.30598	5.41544	5.8658	5.48091	6.19987	5.68644	6.10166	7.09077	5.40553	5.94615
ACLY	6.66033	6.55105	6.06735	6.34994	6.92168	6.71023	6.72282	6.87574	6.6409	6.47864	6.45558	6.58541	6.38826	6.6397	6.82911	7.04958	6.80389	6.11781	6.42292	6.41546	7.14462	6.56916	6.78978	6.6449	6.95124	6.95544	5.97589	6.4146	6.58749	7.22975	6.48816	6.04175	6.65043	6.40594	6.42453	6.31587	6.21512	6.27132	6.34572	6.60287	6.09596	6.46784	6.34228	6.04906	6.53235	6.43997	7.39192	6.23515	6.60535
ACMSD	3.23606	2.33186	0.674886	2.62395	0.604866	3.07902	3.47157	2.04688	1.57985	2.45266	1.87371	3.2129	1.76035	1.34061	1.29946	2.87775	3.32237	2.66191	1.23274	2.84803	0.769212	2.79931	1.40285	3.47219	4.02745	2.634	3.39343	1.72258	1.97213	2.21386	1.7752	1.77403	3.22538	1.12069	3.5349	1.40403	3.8457	-0.0879038	1.39756	-0.0209548	1.85906	3.16987	3.57115	2.02468	2.94069	1.21592	1.50747	2.78311	2.68122
ACO1	7.31517	7.28882	7.43013	7.75855	7.62992	7.67496	7.01294	7.35752	7.41109	7.46496	8.01255	7.40523	7.45892	7.34271	6.98515	7.43621	7.1223	7.36715	7.33778	7.51213	7.35362	6.75506	7.19572	7.86717	7.40523	7.63304	7.61055	7.54616	7.2127	7.26389	7.27186	7.48528	7.25875	7.22675	7.64238	6.81633	7.59115	7.37896	7.82761	7.25932	7.26236	7.31473	7.44141	7.47084	7.58049	7.37826	6.99136	7.06875	7.10845
ACO2	9.25039	9.40381	9.26973	9.46214	9.40621	9.67454	9.45734	9.47994	9.54362	9.73935	9.63649	9.45734	9.4645	8.91286	9.1988	8.68148	9.75826	9.85077	9.97203	9.23911	9.51625	9.70291	9.67454	9.36148	9.61486	9.71124	9.70543	9.53148	9.63393	9.47994	9.65526	9.73607	9.194	9.84467	9.66883	9.55097	9.77595	10.1363	9.78486	9.75015	9.37048	9.84769	9.49212	9.76138	9.58989	9.78962	9.63393	9.6661	8.61842
ACOT1	8.05197	7.57477	7.29702	7.67946	7.88781	8.40976	8.65177	8.64647	8.27048	8.25306	8.51213	8.04931	7.93142	8.63892	8.96867	7.53909	8.5041	8.21373	8.35165	7.70188	8.22091	7.94349	8.59815	7.92345	8.14723	8.56248	8.0724	8.09461	8.61475	8.16626	8.51435	7.88197	7.18924	7.90988	8.18688	7.99595	8.54518	8.28821	8.09389	7.93213	7.65632	7.85787	8.24558	8.38008	7.89591	7.99371	8.25201	7.81481	8.22777
ACOT11	4.84311	5.1895	5.67727	4.97988	5.54985	5.0856	4.97855	5.69557	4.71757	4.88646	5.34375	4.78186	4.07242	4.91011	4.17396	4.73267	4.90713	5.41544	5.47615	4.35062	3.68502	5.22173	4.81956	5.15599	3.43999	5.71129	5.72444	5.07397	4.1073	5.21828	4.02472	5.45865	5.11659	5.42811	5.31983	5.81055	5.15228	5.73962	5.3343	5.59801	4.89522	5.49571	5.12694	4.21845	5.36707	5.41955	5.9458	5.31798	3.68347
ACOT12	2.30457	3.28779	2.15488	3.7669	0.339294	0.685952	3.28006	3.25131	2.68791	1.60597	2.5894	1.71615	2.40841	2.10211	1.83044	1.25875	1.68113	4.22977	2.74481	1.3696	4.62299	2.01796	1.07623	2.45266	3.70679	3.18748	2.66107	2.60488	2.78802	3.18354	2.8559	4.48336	2.50536	2.66375	1.88767	3.65531	3.49561	4.6511	3.39752	0.57488	3.19365	4.40802	1.14022	2.35118	2.68586	3.74634	3.1163	2.29987	2.41541
ACOT13	8.68538	8.4305	9.50264	8.47327	8.45678	8.47327	8.64915	8.79908	8.08918	8.75009	8.06334	7.9711	8.74188	8.86935	8.51661	8.62506	8.55158	9.23667	8.54648	8.67622	8.54034	9.02814	8.55158	8.94198	8.48433	8.89899	8.62506	9.06727	8.38389	9.02814	8.7515	8.78686	7.87292	7.94059	9.11315	8.3098	8.88297	8.66349	8.4296	8.19486	8.79573	8.45058	8.7629	8.61587	8.90201	8.91602	8.85929	8.44604	8.36821
ACOT4	4.56554	3.71047	3.9814	5.06138	4.12543	4.33203	5.012	4.85215	4.26879	4.94297	4.79204	4.68772	4.92108	3.97949	5.07024	4.74873	2.1585	4.55765	4.95948	4.58062	2.83402	4.85648	5.09428	4.48047	3.92675	4.97269	5.27452	3.54003	3.99642	4.77608	3.59889	4.30443	4.68895	4.96447	4.10998	5.09589	5.01465	4.71238	5.01632	5.0533	5.30717	4.89171	5.30573	5.07887	4.41931	4.07147	4.46306	4.62299	4.16491
ACOT6	3.76798	1.49861	1.15474	1.14955	1.30052	1.11558	1.11257	1.13426	0.177605	-0.0333132	1.06095	0.990852	1.79537	3.36254	1.67156	0.51689	0.992234	0.599066	0.964235	0.724086	2.92038	0.206334	2.7277	2.04796	1.31838	1.32095	0.776366	0.70274	0.814386	0.925546	0.743179	0.67604	0.896426	1.46694	0.793052	1.29057	1.25735	0.481541	0.130522	0.669383	0.18611	0.651264	0.64039	0.880387	1.89202	0.642752	0.169095	1.35418	0.917137
ACOT7	5.63799	4.66015	5.34861	5.0143	5.70441	5.12847	5.21156	5.26085	5.1687	5.51518	5.14882	5.11699	4.78354	4.68142	5.95783	5.61654	5.20929	5.18487	5.53453	5.23507	5.37751	5.42203	4.78824	4.68772	5.0749	5.76111	4.58903	5.64781	5.59445	5.29836	5.20524	5.74618	4.87293	5.47439	5.03562	5.65657	4.84683	5.80288	5.20892	5.39573	4.97269	5.77458	4.55275	4.79996	5.18722	5.54198	5.87549	4.9572	4.80856
ACOT8	6.30272	5.70986	6.45211	6.11273	5.7277	6.06995	5.91783	5.98168	6.2971	6.66274	6.09772	6.07151	6.03594	6.89258	6.32979	6.07249	6.01064	6.29161	6.3618	6.34228	6.23515	5.94109	5.88501	5.57804	5.97698	6.67183	6.07151	5.84337	6.14091	6.50292	6.13544	6.21441	5.58746	6.12259	6.74393	5.79359	6.14351	6.44491	6.04947	5.89676	6.16953	6.5081	6.13071	6.08764	5.83975	6.17284	6.00188	6.2773	6.01871
ACOT9	8.27888	8.50005	8.05017	7.78521	7.94775	8.25201	8.43261	8.21997	8.23513	8.10548	8.26949	8.52009	7.90112	8.65692	8.53056	8.59933	7.99755	8.20419	7.84471	8.57798	8.15594	7.96632	7.8454	8.54518	8.36522	8.16553	7.97564	8.2559	8.60573	8.80747	8.70918	8.54774	8.50103	8.71613	8.00846	8.50975	8.38582	8.46704	8.21475	8.03923	8.09226	8.36415	8.12957	8.36821	7.88781	8.58482	8.48329	8.96016	7.60003
ACOX1	6.81546	6.41205	6.67917	6.45131	6.74712	6.49049	6.81069	6.589	6.83208	6.46744	6.47682	6.77263	7.03859	6.62423	6.30975	6.0818	6.67268	6.64651	6.43126	6.08067	6.36782	6.63328	6.05319	6.55898	5.96657	6.36904	6.31655	6.796	6.73306	6.885	6.68485	6.9324	6.65615	6.19123	6.16244	6.31386	6.64804	6.43488	7.28196	6.19081	6.54419	6.00188	6.66661	6.56916	6.89517	6.37335	5.98781	6.33549	5.96081
ACOX2	7.09224	7.13049	8.10298	7.09224	6.67963	7.05191	6.88542	6.32442	6.27165	6.86293	7.14868	7.03442	7.29755	7.11084	6.51047	7.02342	6.79725	7.70454	7.67895	6.91541	6.95946	6.8708	6.62057	6.77698	6.35805	7.07358	7.1928	7.29374	6.55733	7.3819	6.4425	7.96382	7.03722	7.28258	7.80601	7.21478	7.6743	7.54552	7.24224	7.09127	7.2433	7.56041	7.29702	7.39891	7.28466	7.03197	7.41846	7.44253	6.36978
ACOX3	6.28756	5.39976	5.60696	5.62113	5.54836	6.12685	5.55443	6.18151	5.73506	5.52681	5.49671	5.60298	5.17849	5.83504	5.72147	5.82902	5.42483	5.76426	4.4714	5.68861	4.93279	5.84767	5.33611	5.90199	5.90199	5.83468	5.38066	5.91929	5.91783	6.51204	6.00849	5.78661	5.63161	6.02876	5.62823	6.00884	5.62317	5.90057	5.86663	5.99815	4.79917	5.16486	5.70836	6.30527	5.72623	6.23366	6.39056	5.54726	5.12256
ACOXL	0.529792	0.820752	1.73564	3.00435	2.08384	3.47943	0.941312	2.13013	2.49643	2.89562	2.48225	2.29283	2.75964	3.8732	1.59704	2.96303	2.29283	2.87321	1.09433	1.15192	2.7143	1.94069	3.99259	1.50393	0.679428	3.03145	0.740533	1.20841	1.10348	3.0106	1.34441	3.05293	1.67453	1.3128	2.77582	4.24829	2.8389	1.98501	2.41168	3.69501	3.16158	4.1219	3.7551	4.07426	1.57509	1.77967	1.93845	3.04481	2.03618
ACP1	7.43863	7.84052	7.88994	7.62801	7.19667	8.13706	7.75996	7.9548	7.94619	7.79094	7.78124	7.99595	7.58472	7.96797	8.30229	7.83034	7.85933	7.92345	7.85155	7.77535	7.69559	7.77131	7.78966	7.60654	7.77806	7.51756	7.81695	7.88353	7.5182	7.69042	7.8079	7.86361	7.54918	7.4566	7.93368	7.98743	7.63617	7.35696	7.69939	7.60395	7.93837	7.86361	7.88197	7.84128	7.64297	7.6007	7.99921	7.53162	7.36188
ACP2	5.96657	5.93485	6.24822	6.10596	5.50871	6.31587	5.97873	6.38367	5.85506	5.99984	6.07406	5.8008	6.3694	6.90908	6.65657	6.54105	5.88364	5.9629	6.02053	6.66571	6.48098	6.68119	5.82122	6.74847	6.82996	6.89082	5.95966	6.04391	6.60364	6.56178	6.1523	6.39089	5.64534	6.07108	6.68357	6.49569	6.17794	6.93195	6.38979	6.92338	6.73179	5.91579	5.80395	6.37415	6.11448	5.89398	6.45093	6.16206	7.55464
ACP5	3.97174	3.94371	3.6187	2.89176	4.7496	3.2895	4.32603	4.32157	1.53283	1.63035	4.29824	4.59501	2.08701	3.0356	0.552976	4.59791	4.79083	3.81263	5.4537	5.07527	4.37538	2.79598	3.63077	4.1653	4.53645	3.60808	1.69955	3.04764	0.642752	1.34921	1.62328	1.48735	0.952068	3.43606	2.84422	3.75317	2.94714	0.759336	2.93365	4.44617	3.54583	4.55676	1.43988	4.48295	0.176764	4.4336	3.35118	3.36254	5.69488
ACP6	6.23588	5.57916	5.84978	6.16799	6.28251	6.05565	4.96789	5.86144	6.18618	6.64453	6.42105	6.2395	6.15601	5.83683	4.87402	6.68077	6.47799	6.49644	6.30047	5.56324	5.17347	6.25104	6.01314	5.66822	5.03023	6.71139	6.37415	5.6239	6.34954	5.97558	6.56022	5.57765	5.86663	5.8758	6.44455	5.58015	6.09772	5.37455	6.3477	6.04727	6.66362	6.71178	6.47246	6.03815	5.80979	5.41033	5.31598	5.70836	5.27245
ACPP	1.71314	1.22529	1.30489	1.30541	2.19672	1.25831	1.26278	1.27746	0.274929	1.27632	1.44164	0.531382	0.723139	-0.302448	1.59001	1.90566	0.760188	1.00309	0.935171	1.46694	1.79418	1.18355	1.39079	1.17575	1.91708	1.0567	0.463947	1.36564	1.60184	2.02468	0.889048	0.744931	1.59947	1.25218	1.86181	1.21111	-0.403828	1.728	1.53014	0.161325	2.50203	1.05106	0.761037	1.45801	0.582182	1.71192	0.557369	0.886933	3.94324
ACPT	5.10544	4.34562	4.74425	5.81229	5.49783	4.71917	5.29679	4.24064	5.36562	5.2011	4.44891	4.5019	3.99864	2.51517	5.153	4.66448	5.33788	4.47758	4.51336	3.50146	4.54284	4.03263	4.34749	4.49698	4.84915	4.58903	5.24748	5.17106	5.11291	5.29377	5.33648	5.11659	4.42082	5.27312	4.3953	4.8048	4.67336	5.24487	4.32649	5.45548	4.13196	5.38029	4.64947	5.22512	4.86916	5.44916	4.97786	4.37927	4.14351
ACR	3.60649	4.28165	3.79541	3.68744	2.12328	2.55175	4.67892	4.30303	4.72707	3.86559	3.75317	3.61358	3.35516	4.59234	4.12815	4.67892	4.7483	2.89248	4.64493	3.60757	4.39382	4.97227	1.30369	4.04347	1.50171	4.02745	4.19144	4.48295	4.79083	4.7778	5.26733	4.69532	2.13796	1.34278	4.77823	2.60121	2.3622	3.65429	3.90474	0.900813	4.07575	5.09467	3.52461	1.51465	4.29648	5.37714	4.75454	3.70265	1.98331
ACRBP	0.463947	3.0321	3.03378	4.1026	3.27573	3.71901	2.94922	3.19226	4.02184	2.79931	3.425	3.26209	3.21541	3.41722	3.82563	4.13288	3.56262	1.98251	3.47943	3.75181	1.90566	4.2829	3.58338	2.28175	3.68061	3.17686	1.99215	4.02807	4.95629	1.27199	3.21223	2.58821	2.23787	3.62694	3.25131	3.50857	0.881895	4.15464	4.40845	1.96206	3.64264	4.48172	1.75367	4.96414	2.88723	4.28416	3.57946	3.45634	3.56582
ACRC	4.0308	4.73098	4.74916	4.01998	5.10194	0.881141	4.33585	3.74325	4.23327	3.91038	3.23743	4.34255	3.1163	3.46015	4.85345	4.55369	4.62218	1.20159	2.29421	3.88861	3.88233	4.40083	5.1141	4.00432	2.64922	3.45737	3.73303	4.20799	4.19293	2.79681	5.1641	3.43885	4.19582	4.31304	4.35763	4.73452	3.34611	4.42507	3.47485	4.09647	3.95184	4.14169	4.0831	4.54688	3.79222	4.58018	4.77301	4.50787	4.83941
ACRV1	3.49053	3.14875	3.39908	3.91878	3.57274	3.21795	3.378	3.37966	4.06394	4.47278	4.09001	3.2089	4.29221	3.70012	6.00404	4.93324	4.55549	3.9342	4.88975	3.60271	4.8114	3.94553	4.16838	4.63515	3.69644	4.39953	3.91878	3.89807	4.38369	4.2658	4.00432	3.88669	3.71155	2.98914	3.92024	3.14875	4.15611	4.80166	3.40232	4.53904	4.10586	5.21033	3.77667	4.51254	4.59868	4.28	5.32744	4.11134	4.55107
ACSBG1	3.51085	3.24839	2.58447	2.73211	2.90544	3.91923	0.526507	0.715925	2.6726	3.13746	2.76586	3.30996	1.89766	3.65836	2.10785	3.16746	4.26662	1.54975	1.60993	3.00506	1.81131	3.16866	3.28565	1.94069	1.37522	1.95354	3.14449	3.14687	3.31817	3.76293	3.30405	3.71419	1.69955	4.2507	3.80128	2.87605	1.45919	3.93461	3.04021	3.92591	3.59328	3.62033	0.896426	4.41583	2.85941	1.49317	3.63077	3.11202	2.53115
ACSBG2	0.786788	3.105	0.834851	0.82488	2.75163	0.801932	1.6286	3.60217	1.20032	1.34496	0.573518	1.10225	1.56148	3.48054	3.28064	1.10348	0.166911	0.983295	0.266393	3.67562	3.31576	0.692442	1.48088	0.907022	4.08499	2.01033	3.52369	1.6572	2.56272	0.948044	2.50203	1.29057	1.57728	0.805254	1.44692	0.219368	3.52633	4.06922	1.32198	1.3043	1.7555	1.18465	0.725957	0.916362	2.25757	1.27868	2.89176	1.4926	1.47227
ACSF2	6.18723	6.30193	6.85633	5.83181	6.42858	6.73391	6.17028	6.27806	3.1593	5.73031	6.37852	5.50726	6.78172	6.11673	3.59383	4.69181	4.87864	6.23218	5.85613	6.2657	5.79323	6.32016	4.5673	5.52794	3.07772	5.76913	6.00092	6.17794	4.34302	7.6666	5.17731	5.71092	5.26542	5.79393	6.4457	6.26679	6.29857	6.58943	5.59477	5.87549	5.95425	6.28941	6.6239	6.68657	6.61017	6.4332	7.01533	4.79379	6.23515
ACSF3	4.25269	4.43621	3.44327	2.06031	4.34927	4.07329	4.60898	4.0186	2.19219	1.44109	3.73546	2.71044	3.19531	2.62651	2.87247	3.54791	3.60387	2.93936	3.3791	2.75546	1.00576	3.96559	3.09406	1.10287	1.00576	4.50956	3.77311	3.46673	2.63574	3.87554	2.90307	3.95184	3.6119	4.22749	4.10447	1.52128	3.21795	5.18039	3.67859	3.44597	3.30405	2.91897	4.7984	3.84789	3.36717	5.1731	2.84502	3.34432	3.93371
ACSL1	9.98603	9.69707	9.33224	9.98269	9.70291	9.33651	9.84769	9.60009	8.9898	9.29265	9.58989	8.80594	8.50874	9.3964	9.35705	9.3254	9.73607	9.194	8.874	8.61355	9.16831	9.23456	9.40621	9.0212	8.68538	10.073	8.83491	9.08511	8.97402	9.60009	9.10922	8.97402	9.1437	9.22848	9.72034	9.27411	10.0957	9.98269	9.66038	9.04344	9.00199	9.09829	9.38977	9.08304	9.49493	9.60734	9.43111	9.15703	9.2633
ACSL3	8.06929	8.11859	8.04146	8.33899	8.28338	8.00712	8.05824	7.72045	7.86796	7.52742	7.65506	8.12383	7.81627	7.55291	7.35911	7.70512	7.75925	7.96949	7.90258	8.34866	8.17059	7.93528	7.8773	7.99921	7.53844	7.7999	8.14201	7.85787	7.47201	7.762	7.15507	8.22777	8.17495	7.88426	8.15949	7.75646	8.0667	7.92634	8.50649	8.02909	8.3791	7.96632	8.67371	7.9741	7.97252	7.89669	7.87356	8.2069	7.46016
ACSL4	5.55332	5.33896	4.90313	5.2567	5.47799	4.67288	5.67579	5.00361	5.22779	5.38537	5.09305	5.20258	5.16178	4.90545	5.74738	5.33397	5.37596	4.91053	5.27452	5.25206	5.77158	5.03356	5.65657	5.2768	5.58993	5.35822	5.01354	5.69038	5.47336	5.26938	5.80605	5.70511	4.72628	5.31798	5.05409	6.15672	5.00764	5.37784	5.50983	5.45155	5.37784	5.77269	5.42811	5.90541	4.91387	5.53888	5.36021	5.73579	4.89283
ACSL5	4.63808	5.58413	5.45647	5.30946	5.1568	5.72217	5.5573	5.65767	5.54686	5.47439	5.60451	5.91678	5.96849	5.98642	6.00542	5.43467	5.76317	4.94635	5.42166	5.79977	5.54726	5.4382	5.59369	4.78229	5.93553	5.30104	4.91011	5.39898	5.93965	5.07323	5.49745	5.11731	5.33896	5.35486	5.13105	5.2304	5.31759	5.28159	5.76875	6.00996	5.14063	5.5283	5.20074	4.8114	5.57916	5.74067	4.81512	5.4343	6.00816
ACSL6	3.85377	2.86552	3.64167	3.44056	2.68791	3.48377	3.20767	2.8084	4.39776	3.22113	3.13746	3.17432	2.91127	3.44541	3.7303	3.3506	3.54485	3.4928	2.68495	1.91127	1.34278	2.86157	4.15017	3.47157	3.012	2.74058	4.03792	2.65219	3.46498	4.60898	1.96402	3.07319	1.13305	3.3262	2.73287	3.62199	3.14815	2.84656	3.05153	2.92542	3.0497	3.18295	1.73618	4.01774	2.88209	2.56272	2.16804	3.60054	1.54122
ACSM1	3.15863	1.3558	1.44164	3.21103	1.3964	1.38511	1.38328	1.40285	0.739018	0.361515	-0.0306192	1.26159	1.3084	0.768286	1.45852	1.69444	0.829916	0.38661	1.73392	0.510701	1.59759	0.952068	1.42295	0.754923	2.0209	0.745786	1.3747	0.656018	0.265505	0.503243	0.43407	0.975696	1.58837	1.6637	2.06881	0.200288	0.073684	1.28847	1.07029	1.96141	1.62676	2.43319	0.0900882	1.32735	0.982622	1.64681	0.652611	1.09188	1.4794
ACSM2A	1.99308	1.24553	2.25015	2.95882	1.96668	2.54894	2.21896	2.09899	0.615581	1.3383	0.619647	1.54522	0.816238	0.416735	3.82108	2.60952	2.47872	2.24295	1.29557	2.08826	1.25167	0.234642	1.7439	1.81397	1.83389	1.8834	1.46809	1.44435	1.6216	1.97125	1.50808	1.46422	0.808611	1.8374	1.84996	2.4755	1.13128	0.225002	1.41688	2.51189	0.0839589	1.58089	1.64261	1.81894	-0.459521	3.06103	0.667344	0.188105	2.50294
ACSM2B	1.03222	2.16337	4.16669	3.43055	1.03359	1.05407	2.37755	2.43791	1.69776	1.57402	0.613202	1.64133	0.884026	1.44734	1.77274	2.25873	1.2472	1.45496	2.37014	-0.43349	0.642752	1.23217	1.49047	2.18985	0.825577	0.877346	3.49225	2.00676	1.71139	2.97819	1.97788	2.62395	1.41046	0.0253627	3.11059	1.57245	2.16804	0.894138	1.21111	1.1501	2.79292	1.76152	1.22758	3.35118	2.69336	2.83729	1.21526	1.50224	1.16711
ACSM3	4.20483	3.83396	3.39401	4.03555	3.56891	3.27939	0.901515	0.932529	-0.00551668	0.76276	1.47451	1.14321	1.48527	1.46694	0.0912831	1.34007	2.54685	3.25065	4.09271	0.840392	1.17526	0.0515615	-0.0574962	0.418885	2.45675	0.794788	3.14687	0.731633	0.242291	0.968184	1.79035	3.4411	0.788619	2.72495	1.72201	3.272	2.67647	1.4975	3.55385	2.66972	3.20446	3.93986	3.66251	2.58821	3.68552	2.25151	1.6637	1.39079	3.05153
ACSM5	3.79021	4.21076	5.55063	4.27278	4.01774	-0.234319	2.4809	3.97949	4.56592	5.30601	3.83445	3.7089	4.17668	1.49047	2.64838	4.72969	4.9363	4.65816	4.27808	5.67727	4.53296	1.98501	3.59942	4.19144	2.27424	3.39698	5.83579	3.71103	3.64518	4.11841	3.04622	5.9989	4.45646	4.38508	3.9094	4.11614	3.16677	3.41109	4.21489	2.98016	6.48329	5.82371	4.42696	4.50956	4.18673	4.18673	4.81804	4.40256	4.48256
ACSS1	6.245	5.93196	6.51286	6.30565	6.45997	6.89869	6.79119	7.23323	5.9285	6.34954	5.74481	6.34731	5.79008	6.11162	5.41955	6.37574	5.65912	6.77831	6.41809	5.56966	5.18078	6.07364	5.46665	6.24991	5.56535	5.9911	6.94074	5.67952	5.76144	5.6616	5.89676	6.13733	6.6723	6.07719	6.24074	5.94912	6.9453	6.65083	6.68077	6.13653	6.32781	5.44952	6.3618	5.88183	6.24892	5.71615	5.41882	5.92219	5.21903
ACSS2	7.07685	7.66522	7.92909	7.50875	7.30898	7.63754	6.94391	7.23074	7.59831	7.57793	8.06253	7.67762	7.63617	7.96313	7.23273	7.47474	6.81943	8.02581	7.3422	7.80119	6.53388	8.12109	8.14973	7.41281	7.53655	8.11368	8.09694	7.69559	7.15652	7.8053	7.45359	7.59581	6.94166	7.40812	7.95089	7.57728	7.74329	7.49231	7.77465	6.66826	7.30036	7.5687	7.96467	7.49478	7.82181	7.81695	8.36522	7.36842	7.1882
ACSS3	7.2789	6.74229	6.5231	6.51047	6.65778	6.35097	7.45953	6.94622	6.64453	6.75671	6.40629	6.5196	5.89779	6.34495	6.64327	6.63084	6.53544	7.15318	6.99747	6.73973	6.3806	6.62546	6.80513	6.03594	5.81096	6.54136	6.92077	7.2789	6.39965	7.04573	6.57144	6.66789	6.22744	6.62717	6.4728	6.51879	6.56216	6.9559	6.76048	6.12833	6.65281	6.86521	6.78633	6.61931	6.28293	6.99984	7.41225	6.43196	6.37614
ACTA1	10.8915	11.7282	10.5596	8.41576	11.1071	11.6311	10.9955	11.4953	11.0478	11.4668	11.6311	12.0896	11.0478	11.6781	11.8059	11.7282	11.4953	9.43111	10.3943	11.7282	11.4953	10.9142	11.145	11.8059	10.7457	11.4953	11.1927	9.69369	11.9144	10.7875	11.8059	11.6311	11.4668	11.7282	11.3006	11.6781	11.9144	11.7282	11.3476	11.8059	11.4668	11.6311	11.9144	11.7282	11.4668	11.8059	11.7282	12.0896	10.3797
ACTA2	6.77953	7.54496	6.89956	7.30567	7.62481	7.39192	7.20575	7.53225	7.66274	7.40174	8.28821	7.28146	7.37963	8.28244	7.99921	8.65305	8.40247	8.28432	8.28058	8.1767	7.73845	8.15685	7.57922	7.21743	8.30786	8.32321	8.30128	6.7056	9.07967	7.65108	8.194	8.96357	10.0175	9.6205	7.87432	7.35151	9.09995	7.57793	7.14462	7.73578	8.23052	6.98286	7.48823	7.95624	7.63617	7.3493	10.088	6.80389	8.25003
ACTB	9.28568	9.75015	9.02814	9.25478	9.86013	10.1913	9.63141	10.0257	9.69369	9.33651	10.4193	9.95503	10.4616	9.87315	10.2578	9.90458	9.97203	9.6826	9.89524	10.1322	10.2302	9.75826	10.124	9.99613	10.7958	9.78962	8.99158	10.1611	10.0449	9.43361	9.84163	9.0349	10.222	10.1524	9.45515	9.87982	9.69976	9.66304	9.70543	10.3382	9.52613	9.60734	9.13513	9.58989	9.77919	9.65526	10.1611	9.2716	10.6146
ACTC1	11.7282	11.9144	11.6781	11.8059	11.7282	11.8059	11.6781	11.8059	12.0896	11.4953	11.8059	11.9144	11.8059	11.8059	11.9144	11.9144	11.3476	12.0896	11.8059	11.6781	11.8059	11.7282	11.6781	11.7282	12.0896	11.5182	12.0896	10.8915	11.8059	12.0896	10.73	11.5182	11.9144	11.6311	11.9144	11.585	11.7282	12.0896	11.7282	11.4953	11.6311	11.6781	11.7282	11.6311	11.8059	11.5182	11.6311	11.6781	11.1254
ACTG1	9.54118	10.3145	9.45277	9.50264	10.222	10.1196	9.81114	10.088	10.0919	9.79529	10.4668	9.86975	10.3052	9.94798	10.5308	10.1866	9.94102	9.66304	10.1575	10.451	10.6475	9.92621	10.6475	10.1278	11.0647	10.0839	9.31591	10.6084	10.6402	9.73935	10.4835	9.28568	10.6402	10.6146	9.59239	10.3439	9.6178	9.72034	9.58989	10.5119	9.75567	10.2085	9.50264	9.80821	9.9014	9.8666	10.6626	9.20088	10.8592
ACTG2	5.79256	6.58367	6.03815	6.63208	6.43652	7.01962	5.58487	7.1928	6.9453	6.09082	6.70312	6.54912	6.34994	7.33214	6.99799	5.7807	6.91812	6.36978	6.51523	7.1716	6.71391	7.28306	6.08764	7.21164	7.21429	7.11684	5.67209	7.84259	7.09405	6.79682	6.81026	6.75919	6.27693	5.8209	6.58171	5.55652	8.08144	7.22466	6.2411	6.29344	7.4357	5.65476	6.85237	6.78878	7.01672	6.30115	8.38389	6.19562	6.21677
ACTL6A	7.17255	6.85992	7.04815	7.00512	7.10226	6.41845	6.50376	6.22853	7.06272	6.27693	6.71564	7.17255	6.47204	6.74752	7.01672	6.69299	7.00837	6.37092	6.98611	6.95124	6.96355	7.22158	6.84448	7.20722	7.44141	7.21164	7.10518	6.75745	6.92759	6.24606	6.81943	6.61274	6.40594	6.63452	6.53466	6.82911	6.73799	6.81546	6.52083	6.97826	6.8551	6.64369	6.70347	6.68357	6.42895	6.47168	6.2821	7.14061	6.58663
ACTL6B	0.15298	0.131626	0.15764	0.169861	0.158918	0.160169	0.150803	0.153998	4.58498	4.61222	4.40393	4.57976	4.36488	1.45446	3.69706	1.61247	1.79358	1.52352	1.39365	3.68246	1.56033	2.95625	1.28393	1.66619	1.79537	0.00588198	0.229653	0.790506	1.07552	0.175492	0.180597	0.718103	3.74893	2.15112	1.47505	2.01417	2.78311	1.58377	1.59001	3.67088	1.73564	3.65989	1.84323	1.74033	2.52072	3.21541	4.59415	4.42603	4.30004
ACTL7A	1.12412	1.09986	1.18875	1.17792	1.13773	3.60054	1.14619	1.16012	1.44585	1.29557	1.2984	1.29057	3.36669	2.94494	2.1355	0.182751	1.64203	0.940008	0.977858	0.784163	0.797123	4.69755	0.695523	1.06896	2.96156	0.952746	2.91272	0.579204	0.269636	2.09165	2.78165	2.74839	1.11062	0.565552	1.71678	1.76518	2.77504	3.86559	0.584727	-0.201158	1.71902	3.94608	4.19046	4.21933	3.50627	0.139802	1.41688	1.71555	0.729786
ACTL7B	3.66984	1.53014	1.61759	4.01641	1.56217	1.89844	2.16804	4.4013	3.33565	3.88767	0.279257	0.603507	2.44959	0.794788	0.935171	1.64507	1.97125	1.57935	0.228778	1.62564	4.29915	1.61759	1.75179	1.93915	1.58261	2.13796	1.47451	1.3651	1.57783	1.96052	1.45852	1.63839	1.00576	2.86157	1.96586	0.93316	2.11746	0.166911	1.14619	4.25174	1.56275	2.0209	1.52579	0.596175	3.02584	1.50563	1.40595	0.139802	1.18644
ACTL8	1.47284	1.43774	1.52024	1.52352	1.47122	1.4686	1.4686	1.48207	0.768286	1.11614	0.239501	0.744931	1.12581	0.959612	1.42234	0.542657	1.54297	1.19401	0.813541	1.40086	3.31522	1.44976	0.23773	1.37522	1.82249	0.51292	0.744931	1.63954	1.52076	1.49211	1.46476	2.11868	0.148448	3.08283	0.712131	1.00777	1.34121	1.14905	1.09312	0.881141	0.174211	0.913584	1.57618	1.05346	0.86671	1.21006	0.227609	0.977858	1.13959
ACTL9	1.94069	1.87891	1.97894	2.00769	1.90173	1.90324	5.21311	1.92277	1.66978	1.20554	0.77722	1.15192	0.843453	1.43444	2.05707	1.41046	1.24028	2.00193	1.67453	1.62498	1.58041	2.0209	0.148448	0.968184	1.24279	1.49646	3.01352	1.78788	2.58447	1.73745	1.85264	3.13367	1.96586	1.61759	1.32628	1.95199	2.68026	1.58889	2.19092	0.240313	0.308413	1.06896	2.04273	2.31341	1.3084	1.38967	1.98155	0.428992	1.15894
ACTN1	6.80206	7.08887	6.47724	6.51081	6.98245	6.85944	6.45281	7.26185	7.12505	6.44108	7.73378	6.86567	7.05856	6.63611	7.20634	7.43013	7.17406	6.55061	6.79725	7.79156	7.72185	6.96176	7.27034	7.93213	8.24267	7.7239	6.25895	7.6666	7.19324	7.45359	7.33945	6.88757	8.06585	8.2287	6.89376	8.02909	6.66033	6.79239	7.02811	7.75094	6.96991	7.28046	6.55855	6.87401	7.17105	7.30397	8.81025	6.49206	7.7681
ACTN2	10.2813	10.4403	10.0175	10.03	10.3797	10.4951	10.2302	10.451	9.9927	10.4304	10.3599	10.4403	9.96467	10.4835	10.5237	10.222	10.0649	9.66038	9.9157	10.5006	10.0994	10.178	10.5362	9.9787	10.3288	10.518	10.6548	10.104	10.4147	10.0257	10.1866	10.3382	10.0608	10.2482	10.319	10.4193	10.0102	10.3382	10.3382	10.3288	10.8258	10.73	10.3797	10.2962	10.5596	10.3095	10.8059	10.5237	9.76719
ACTN3	1.24224	1.21592	3.84224	2.8173	2.61245	1.25001	3.99012	1.27016	1.27016	1.85472	1.08639	2.56188	0.771053	0.275872	3.41167	3.02507	2.95812	1.14321	4.06778	2.0753	1.48319	4.09866	0.137666	1.03419	0.190201	1.52962	3.90988	3.15685	3.90005	2.60488	3.84885	3.76293	3.68061	3.2167	3.40596	0.973545	3.19653	1.63497	2.79453	0.465876	0.571939	3.90474	0.623771	2.11106	1.75244	3.94179	2.57761	1.72149	1.08999
ACTN4	5.95886	6.45131	6.4078	5.57083	5.44154	5.91579	5.59878	6.43611	6.01987	5.90579	6.39589	5.69342	5.46268	5.69855	5.76353	6.26015	5.04092	6.65862	6.65083	6.66319	5.91857	6.54867	5.62782	6.63286	6.24152	7.16306	5.90127	6.76905	6.88369	5.69855	6.74307	5.55296	7.3422	6.79767	6.95902	5.83143	7.04864	6.42526	6.99945	6.84575	6.71825	6.05665	6.41609	5.76767	6.56716	6.34844	7.38423	5.51738	6.26907
ACTR10	8.96016	9.82898	9.6205	9.10725	8.92233	8.67881	9.12538	8.81614	9.21994	9.2633	9.34543	9.31591	9.36148	9.43593	8.96016	9.58458	9.11315	9.43361	9.46967	9.38772	9.15314	9.38002	9.21812	8.60573	8.83938	9.19028	9.08511	9.17621	9.79868	9.59239	8.88166	9.09421	9.38484	9.53869	9.46699	9.11647	9.5458	9.6178	9.30285	9.41109	9.19222	9.43593	9.35466	9.33224	9.2834	9.47726	8.56723	9.61486	9.15703
ACTR1A	7.1928	6.89911	7.15652	7.39303	7.29983	7.70002	7.36141	7.37504	7.6027	7.82612	7.87171	7.53406	7.33118	7.57922	7.29585	7.81826	7.65447	7.74329	7.65187	7.55636	7.35151	7.47201	7.19619	7.72532	7.31353	7.96871	7.59329	7.72323	7.41567	7.74119	7.42744	7.53406	7.15462	7.85857	7.6027	8.13706	7.25932	7.56934	7.29983	7.55464	7.34706	7.87026	7.41281	7.81268	7.31188	7.7641	7.27233	7.49827	7.80465
ACTR1B	7.51945	7.10613	7.4263	7.62853	7.08936	7.36287	7.07734	7.07593	7.50568	7.61677	7.9548	8.24558	7.49302	7.37128	7.24752	7.49602	7.43676	7.62362	7.43676	7.27622	6.86158	7.49358	7.1882	7.62608	7.66906	8.08747	7.53909	7.26992	7.50934	7.70321	7.61116	7.89082	7.44366	8.38097	7.66906	7.96243	7.57793	7.80119	7.58921	8.2771	7.43178	8.06762	7.49358	7.75712	7.54328	7.60519	6.99445	7.78883	6.74484
ACTR2	6.94577	6.99265	6.41645	7.39369	7.64063	6.98706	7.2302	7.41687	7.13194	7.00747	7.07552	6.98563	7.55858	6.83042	7.55232	6.87708	7.83916	6.84357	7.14212	6.77649	7.85304	6.63208	7.30338	6.87129	7.46912	6.56594	7.36491	7.17058	7.29755	7.06141	7.23909	7.16508	7.11229	7.17355	6.51482	7.2481	7.20722	7.48992	7.4087	7.75646	6.79027	7.23533	6.79284	7.26949	7.1903	7.33316	6.66826	6.97522	8.25697
ACTR3	8.62377	9.13843	8.51891	8.73777	8.76702	8.9354	8.78824	8.7742	8.59815	8.55259	8.61587	8.63275	8.71202	9.00368	9.54362	8.83938	8.73906	8.4035	8.49787	9.14184	9.23911	8.76992	9.03314	8.77134	9.02814	9.05216	8.36821	9.00927	8.75009	8.50318	8.95164	8.55712	8.91286	8.70389	8.46811	8.82336	8.44604	8.3662	8.64761	8.8769	8.61842	8.60573	8.59535	8.60158	8.54518	8.61475	9.11502	8.38296	9.54118
ACTR3B	5.09387	5.41435	5.54055	5.24297	5.62955	5.08634	5.33648	4.52902	4.69978	5.29084	5.29969	5.40263	4.72294	4.8224	5.41659	5.10762	5.47584	5.2266	4.40211	4.80569	4.66188	5.37957	5.37881	4.98748	3.64109	5.25432	4.94081	5.47654	5.39131	4.42824	6.22959	5.6239	5.3296	5.75115	5.30946	5.58709	5.72444	5.68319	5.58376	4.92577	5.40335	5.269	5.28052	4.82276	5.21677	5.37419	5.61903	4.92813	4.48799
ACTR3BP2	4.01175	2.63487	3.04021	4.15556	3.52786	3.14189	2.97308	2.28664	2.96724	3.63026	3.14627	3.52955	3.98285	3.27806	4.66706	2.49987	4.05643	2.76586	1.22023	3.71212	3.74741	4.31987	4.68142	3.83605	2.69913	3.226	4.60936	3.8593	3.92171	4.05124	2.6396	3.92262	3.24103	3.77468	4.00294	3.53319	3.13112	2.87034	3.06548	2.35695	3.37342	3.20497	3.57165	3.07772	3.04481	3.54115	2.97608	3.43281	3.28064
ACTR3C	5.3545	4.75784	5.73893	5.03767	4.43227	4.94381	4.8762	5.0298	3.86957	5.31087	4.27628	3.87648	5.20852	6.07442	2.86157	5.17619	3.23679	4.86288	4.69978	5.33896	4.69138	5.78562	5.89779	5.76573	5.77962	4.37355	5.33788	5.22446	4.73182	4.54079	5.35528	5.17067	4.51254	4.8552	3.15863	4.87699	3.42935	4.77868	3.19531	4.42696	5.45111	5.34861	5.8658	5.17106	4.99365	5.07145	4.26621	4.81012	4.62343
ACTR5	5.06462	4.52587	4.68933	4.25313	4.31391	4.76797	4.92038	5.0726	4.61476	5.18004	4.67892	5.43141	4.89171	4.36806	5.24221	4.66706	5.11699	4.56906	4.63158	4.92848	5.09937	4.6157	5.27852	4.51668	4.14973	4.67759	5.06384	4.84915	5.17227	4.38994	4.58105	4.80409	4.5373	5.04169	4.82606	4.57626	4.73735	5.01843	4.65445	5.31562	4.91507	4.48676	4.91507	4.61825	5.27245	5.34778	4.19366	5.18762	4.9363
ACTR6	6.92211	6.31136	6.84357	6.81494	6.4798	6.69893	6.85192	6.69554	5.89194	6.19527	6.36702	6.56988	6.62269	6.14165	5.95381	6.40983	6.30154	6.27844	6.52743	6.68077	6.69046	6.32824	6.14723	6.23294	5.90737	6.73267	6.90005	6.51523	5.98241	6.06154	5.92813	6.43196	6.67143	7.07358	6.72159	7.18151	6.56466	6.67758	6.76988	6.82116	6.61152	6.78466	6.81186	6.81231	6.51119	6.64845	6.40555	6.92381	6.54504
ACTR8	6.19668	6.63805	6.32595	6.3233	6.29893	6.56466	6.88992	6.94577	6.21125	6.5993	5.91241	6.08837	6.16091	6.24822	6.38134	7.05616	7.05236	6.09507	6.09328	6.53812	6.30494	6.73427	6.48373	6.55105	6.20508	6.14284	6.50496	6.33812	6.19877	6.06849	5.98781	6.53307	5.98427	6.24074	6.64528	6.14003	6.30903	6.32941	6.34008	6.24715	6.27347	6.14387	6.58336	6.66826	6.3797	6.71526	6.18551	6.37251	5.96886
ACTRT2	2.31222	1.27364	1.35471	1.35366	1.3084	1.5815	1.30541	2.91754	0.914842	0.667344	1.06568	0.959612	0.244151	2.47779	1.80206	1.22198	1.25116	1.21638	1.27364	1.21329	0.228778	1.20953	1.29005	0.972801	1.29495	0.845128	0.665227	1.98069	1.21751	1.66556	0.906214	1.56089	1.12775	1.85679	0.734406	0.547999	0.656018	1.23919	0.481541	0.618179	0.276773	1.32143	1.63901	1.05843	1.28393	0.931114	0.784163	1.6444	0.776366
ACVR1	7.30618	7.25774	7.11825	6.96585	6.69381	6.76178	6.6281	6.69814	6.64925	6.88711	7.56337	7.22622	7.18924	6.90135	6.88757	7.09602	6.79947	7.02862	7.54385	6.98901	7.42959	6.96718	7.1127	6.70719	6.93066	7.05142	7.07456	6.5679	6.72874	7.51325	7.09456	6.91585	7.10895	7.37447	6.82953	7.15318	6.98611	7.0787	6.84793	6.79511	6.2564	6.70429	7.05465	7.35528	6.98994	6.97926	6.53617	7.27034	7.26795
ACVR1B	5.54874	5.39013	5.51786	5.71968	5.39399	5.63583	5.83368	5.54902	5.89565	5.84266	4.56906	5.43858	5.38611	5.58782	6.10778	5.27852	5.50578	5.40992	5.09969	5.7102	5.63193	5.41698	5.2171	5.28774	5.69209	5.34897	5.23627	5.79874	5.71898	5.75435	5.54465	4.934	5.24487	4.80241	5.51484	4.94879	5.13637	4.66058	4.96582	4.78868	5.15977	4.62937	5.37455	5.60082	5.19704	5.06384	5.5272	5.21469	5.10194
ACVR1C	3.43108	3.67658	2.7059	3.4981	3.42553	3.90658	0.65948	3.57468	2.8428	1.9292	3.2015	3.00362	3.46278	3.48377	3.90332	3.1781	4.11558	3.49764	3.46609	2.51403	3.45856	1.79293	4.12506	3.20664	2.11961	3.28006	3.16228	4.50441	1.78146	5.38426	3.71212	2.70407	5.98322	3.06292	3.75089	3.94271	3.07508	2.01033	2.4617	1.45342	4.014	3.8169	3.90005	2.37257	3.9394	1.61639	4.33304	3.05563	3.4034
ACVR2A	6.36484	5.80912	6.11273	6.23515	5.67379	5.53163	5.80251	5.93591	5.59477	5.37121	5.93996	6.4146	5.70441	6.05705	5.98392	5.9989	6.09876	5.70766	5.56966	5.59095	6.05059	5.95886	5.66471	6.31212	5.49635	5.60696	6.68357	5.78733	5.74033	5.76111	5.68319	5.68351	6.30975	5.5845	7.07781	5.83402	5.83006	5.80568	5.87713	5.78733	6.1858	6.36144	6.05243	5.75567	5.94323	5.59585	5.46995	6.34922	5.83255
ACVR2B	4.32283	4.72628	4.33157	5.20294	4.99512	4.28596	5.27388	4.16012	4.49619	4.393	4.39261	4.55231	5.51823	4.45729	5.05449	4.76675	4.95583	3.684	4.38024	4.38508	4.77952	4.9825	4.02647	4.03263	3.59058	4.03451	5.83402	4.53512	4.12724	4.63515	3.55385	4.66576	5.25241	4.67469	5.4826	4.77081	3.67797	3.10233	4.71071	3.95523	4.42869	5.34129	5.1477	4.32556	4.1653	3.49715	3.55327	5.39247	4.46523
ACVRL1	4.16921	5.27353	5.68023	5.22779	5.71514	6.03169	5.0722	5.88501	4.95987	5.60228	5.68023	5.46424	4.77214	5.62823	7.06919	4.72381	5.34275	5.86813	5.48091	5.85506	5.87445	5.69453	5.32744	5.32023	6.09507	5.91464	4.25493	5.30537	6.39657	4.63069	5.76538	4.99032	5.40163	5.01132	5.33538	5.02114	4.14715	4.85606	5.11253	5.30601	5.36383	5.10279	5.11174	5.57843	5.28052	5.95494	4.61022	4.56028	5.84694
ACY1	1.84729	1.79537	1.88696	1.91871	1.81584	1.82175	4.3527	1.84268	0.804378	1.12839	1.58528	1.29005	0.0685046	1.59472	3.18673	1.18644	1.37815	1.07376	1.1501	1.35366	1.54355	1.1501	1.33649	1.51373	1.45446	3.07833	1.65603	1.21526	1.91127	1.55799	1.38738	1.4686	2.28412	0.771996	1.33774	1.37754	1.62109	1.17056	2.90619	1.0906	1.01007	1.99308	1.0381	1.00378	1.92277	1.12131	1.19983	1.59893	0.329348
ACY3	3.47536	4.26089	3.22891	3.72298	3.36436	4.26135	3.94324	4.58597	4.27454	4.26879	4.02284	4.27808	2.92628	4.20078	6.17721	3.28343	2.39062	5.1991	3.9342	4.91671	5.08157	4.61429	2.51403	4.31015	3.8375	3.99109	5.49671	3.35973	3.93986	3.73187	4.74556	5.47409	3.07068	4.06734	4.1339	4.05914	3.93655	2.17023	3.45577	3.73082	3.65836	4.68188	4.23102	2.17635	4.39732	4.78783	3.97765	4.39953	4.3274
ACYP1	6.73504	6.77152	7.24904	6.89648	6.42673	6.4407	6.58298	6.57516	6.19808	6.96672	6.42187	5.7785	6.35763	6.29587	6.02523	6.30047	6.8207	6.49249	6.14126	6.37092	6.60754	6.70684	6.6281	6.68077	6.01242	6.61274	6.0157	6.92708	6.30079	6.75381	6.15785	6.72077	6.68195	6.22207	6.47766	7.03625	6.54912	7.09506	6.52352	7.01205	7.45892	6.44342	7.01721	6.74671	7.10129	6.51047	6.919	6.5683	6.76523
ADA	4.68728	5.94878	6.17358	5.53163	5.99414	5.5261	5.50384	5.91533	5.88951	5.24709	6.13768	5.29123	5.33031	6.84051	5.50124	5.76573	5.13452	6.09328	6.03458	6.65573	4.28165	5.93094	5.65804	5.74803	6.02309	5.74939	4.74556	5.75336	6.17322	5.19123	6.2395	4.98787	4.96371	4.67382	5.92919	4.03129	5.45073	5.57843	5.80813	5.20643	4.98826	5.40012	5.20184	4.414	6.14831	5.86335	4.73267	5.28239	7.15757
ADAD1	4.29692	2.63769	3.80771	3.65429	3.3854	3.3389	3.47943	1.75719	3.53068	3.92312	3.57735	4.16344	3.49328	1.22529	4.53864	4.1389	3.99012	3.83547	4.19625	1.7765	4.44754	3.92591	3.68006	3.91175	2.49223	4.05738	3.59942	3.36669	4.65617	3.79541	3.51892	3.84177	2.92542	3.87599	4.19894	3.67859	3.45737	3.48787	4.06209	3.39343	3.13812	4.46076	3.01484	3.60329	3.34725	4.1758	2.84422	3.80681	3.69501
ADAD2	1.46041	3.21422	3.72566	1.50926	4.67511	4.82412	1.45745	1.4697	3.56633	2.25015	3.18163	1.73974	1.96486	1.66796	4.25864	3.79541	4.39209	0.841868	3.84376	3.15563	0.980562	1.68226	1.67703	1.06568	1.80985	1.22529	1.53228	3.12253	2.62754	2.21763	2.05404	2.90544	1.35366	3.46777	5.10687	6.42187	1.33261	4.1981	3.08407	3.22415	0.744931	4.7111	0.342991	4.20355	1.49533	1.49481	3.82899	0.986649	2.60771
ADAL	6.48495	6.24337	6.54992	6.66529	6.33022	6.01209	6.11633	6.22744	5.77609	6.05458	6.4794	6.38016	6.23993	5.92668	5.40916	6.65405	6.45513	6.76821	6.56216	5.52144	5.90468	6.1747	5.92427	6.70646	5.98536	6.19668	6.53466	6.07579	6.60576	6.65573	5.9604	6.76302	5.93996	6.33247	6.51047	6.42934	6.61842	6.07406	6.10166	6.05705	6.58048	6.42934	6.45997	6.39884	6.38134	6.75181	5.60801	6.56466	5.64642
ADAM10	7.85721	7.70118	7.43805	7.55747	7.7239	7.33607	7.52742	7.69233	7.53539	7.04479	7.56273	7.12182	8.09389	7.12406	7.81548	7.2649	7.81207	6.80439	7.56633	7.44475	7.89082	7.95624	8.23893	7.39303	7.22725	7.30673	7.37896	8.1758	7.34428	7.83769	8.04146	7.46496	7.56569	7.42856	7.13297	7.05191	7.49302	7.87432	7.54552	7.80864	7.47936	7.64173	7.5598	7.30284	7.41629	7.52368	7.01672	7.56273	8.16811
ADAM11	1.53611	3.85833	5.95783	5.8008	1.53175	5.86741	5.44809	5.80426	4.20355	4.64316	2.7465	1.96944	3.49225	4.26355	5.39247	1.86479	3.30801	3.94507	3.56475	1.14144	1.46144	4.23977	3.95286	3.14875	2.58156	5.17657	4.2507	4.30443	3.82509	5.11291	3.79074	4.39996	-0.0770782	1.10513	1.73799	1.12468	3.66297	4.34515	1.80601	1.31179	2.94714	3.11202	3.54382	2.63662	3.3791	2.3344	1.12716	-1.31744	-0.234319
ADAM12	3.00992	1.93254	1.75486	2.82137	2.25757	1.69719	1.69668	1.86479	1.68226	1.0186	1.0554	0.166911	1.40285	1.50127	2.65122	3.42657	2.29987	1.10998	1.35366	1.21168	1.53787	1.96141	0.408658	1.96296	1.26102	1.26963	1.79473	1.81831	2.5983	1.59001	2.64438	1.68457	1.97492	1.58041	2.10998	1.61818	1.18764	0.519537	2.0114	1.67156	2.5894	2.80689	1.49646	1.62109	0.271285	1.39315	1.73218	0.907022	0.886128
ADAM15	6.04804	5.62351	5.58993	6.72964	6.24789	5.6503	5.86547	6.19081	7.23371	6.59259	5.1967	6.33022	4.84066	5.33975	2.79845	4.30716	3.49664	5.71937	6.18975	6.56756	4.49817	5.25359	6.8253	5.58782	6.51803	7.68074	4.66229	6.21992	7.85304	4.48001	6.26784	5.3545	6.20983	7.32378	6.36332	6.10702	4.5546	7.2042	4.35015	6.54834	6.55145	5.41544	6.23294	4.92382	5.35977	5.08116	5.1995	5.43613	7.10083
ADAM17	5.78004	5.58523	5.89533	6.19007	5.76144	5.62254	5.48948	5.5614	5.94363	5.99371	5.90656	6.20096	5.83754	6.50847	6.75058	5.8311	5.87033	5.99854	5.75404	5.75298	6.06665	5.7361	5.9338	5.81329	6.02343	5.78452	5.55617	6.11127	6.07183	5.22173	6.38633	5.49705	6.11309	5.87963	5.40414	5.84978	5.70546	5.70226	6.12297	6.05423	5.88707	5.08003	5.13992	5.70908	5.76144	5.67545	5.83789	6.2102	6.44147
ADAM18	3.21353	2.25757	3.06864	2.68586	3.43336	2.7547	2.19439	3.92069	3.0887	1.57834	3.59058	4.54733	2.21628	3.6588	2.39866	2.57373	4.00387	2.28306	3.38884	4.0145	3.26804	3.77573	3.03145	3.38884	1.95974	3.67859	2.99619	2.94069	3.25322	3.50799	3.12744	2.85308	3.18541	2.53777	3.34493	1.89844	3.32287	3.39517	1.58089	0.558887	3.51892	3.3905	3.30996	4.13979	2.66284	1.4789	1.96586	3.56529	3.17362
ADAM19	5.50759	5.15896	4.99558	5.11659	5.18645	4.20171	5.18722	5.17731	6.33549	4.59158	5.05102	5.39091	5.82969	6.474	7.08299	5.25126	4.59619	4.8337	5.29609	5.53272	5.30104	5.61473	5.78277	6.66362	6.1571	6.608	4.9706	5.21424	6.70646	5.86989	6.66451	5.09467	4.85648	5.80979	4.17196	5.29899	5.38647	5.82333	5.25126	5.10119	5.73137	5.28627	4.83208	5.25829	5.09152	5.51484	6.34954	5.62282	4.67171
ADAM2	0.931114	2.67937	2.42198	2.10121	0.475948	3.18295	2.44832	2.30362	1.04901	1.17234	1.24887	1.95518	0.82737	0.905489	1.1774	0.817119	3.86666	0.93192	1.22637	3.03616	1.01205	0.862779	4.02472	3.00796	3.68502	2.38249	1.26159	1.20554	1.31504	1.71782	1.25001	1.32143	0.93192	0.960895	0.224153	0.25878	1.54655	0.235589	1.10348	1.65778	1.13188	3.91823	1.13375	1.81831	3.38761	1.15594	2.44063	1.31075	1.99116
ADAM20	1.06691	1.03742	4.49985	4.60739	2.8459	1.09122	3.94464	1.10459	1.1648	0.797891	2.21763	1.20953	1.86332	2.81341	2.64048	3.36899	-0.378733	2.8347	1.38967	3.37449	2.18743	1.31896	3.72934	1.71367	2.16081	0.283948	4.55899	1.07747	1.14425	1.62328	1.96206	1.42496	2.50975	2.27952	3.8727	1.52858	0.166911	3.6492	1.74442	1.19586	3.54485	3.31636	2.16081	3.92262	3.34493	1.83873	5.1073	2.22254	2.26211
ADAM21	4.90433	3.21026	3.07381	3.58543	2.59313	2.98551	3.64371	2.05315	1.40086	3.59942	2.98016	2.82398	1.55134	1.48146	3.14508	1.61639	2.76398	3.54436	4.47877	1.69038	3.73867	3.60808	3.64564	3.07202	2.59143	3.07902	2.6647	2.1932	3.28448	4.03405	2.47157	3.48996	3.99305	3.20833	3.11693	3.1243	2.75	3.59619	2.95163	0.529792	3.83605	3.29919	3.37342	4.13103	3.48264	3.33219	2.43791	4.10633	4.49182
ADAM22	3.272	2.95625	3.28064	4.12954	3.18423	2.84656	2.6736	2.61054	2.71939	1.75904	3.80867	2.86712	3.48611	3.44848	3.47943	3.75463	2.87605	3.34725	3.67706	3.35223	3.26619	2.66641	1.1648	2.61163	3.12632	3.51687	5.08318	2.53115	1.31896	3.01736	3.18983	3.54902	4.09271	4.15064	3.33219	2.9373	2.05107	3.24892	2.78311	0.914842	3.06419	2.91046	3.25392	3.53706	2.40841	3.72771	2.51189	4.03978	3.44541
ADAM23	7.35586	6.8363	7.17898	7.32906	6.98425	7.32205	7.78665	7.11974	7.19667	7.08738	7.0787	6.89213	7.31575	6.71139	7.03336	6.45997	7.47642	7.27519	7.14417	6.53768	6.32941	6.65903	6.89043	6.65698	6.39438	6.93018	7.03722	6.98515	7.02202	7.06831	6.96084	6.88898	6.3773	6.41205	6.83537	6.54912	7.06091	7.09825	7.15462	6.15908	6.58253	6.79417	6.73427	7.39252	7.05465	7.14417	6.00816	6.42858	6.29422
ADAM28	1.26159	1.23274	1.31504	2.77428	2.33568	3.6157	3.61305	3.27517	3.41553	1.40937	2.85506	3.27084	0.734406	-0.126665	2.91347	2.5229	1.60993	1.33036	2.69824	1.74558	1.49969	1.03612	3.06932	1.71424	2.55886	0.166031	0.838785	2.04381	0.555849	0.552976	1.26963	0.529792	2.3344	1.21386	1.94765	3.08808	0.149468	1.6511	1.3696	3.64612	0.178667	0.822454	1.14547	1.93254	0.253392	1.69611	-0.0461083	1.46527	1.56386
ADAM30	3.12253	2.26575	3.15744	2.84803	3.08343	2.57761	3.21922	2.52601	1.8678	2.2562	2.75388	2.92474	1.56972	1.72021	2.98715	4.27182	1.72088	3.03318	3.2668	1.58261	4.07528	2.14889	1.6643	3.03378	1.84323	2.85381	2.50975	2.46646	2.57859	2.85941	2.6706	2.43681	3.18049	3.6366	1.73218	2.19092	2.12646	2.98784	3.60217	1.47683	1.39315	4.26089	3.37449	1.08871	3.25972	2.84058	2.36328	2.56677	3.15685
ADAM32	3.09335	3.37966	3.47757	3.55562	3.03378	2.81894	4.24105	2.48342	4.17298	2.80109	4.04982	3.09074	4.91793	4.61309	2.96017	3.34368	2.24063	1.23647	4.4013	3.75847	3.90282	1.48368	4.61694	1.54655	4.29824	2.73211	4.22382	4.0411	4.28772	3.97949	5.49824	3.21479	1.11778	2.96156	1.21386	4.74208	2.08491	4.2456	2.5894	2.53458	2.11338	3.92637	3.99498	3.5474	0.845128	4.03451	0.125476	4.30845	3.76202
ADAM33	5.47472	6.32016	5.75298	5.5272	5.18004	4.9501	6.01683	5.98241	4.29774	4.11224	4.92662	4.33988	4.01902	3.38022	1.48088	3.81445	5.05773	5.24409	4.79632	6.24571	4.35634	3.51586	2.63115	3.64321	4.10492	4.32786	5.37493	4.27322	4.86586	6.02377	4.92461	4.47085	5.91398	5.25932	5.17812	5.48228	5.28357	6.67143	4.95216	5.7266	4.4751	5.27748	5.74481	6.07876	3.52112	5.48581	6.73045	4.44709	4.01641
ADAM3A	2.18864	2.57569	2.86086	2.36107	2.38249	1.31453	1.78461	1.76634	1.53841	1.44585	2.07309	2.18535	2.4516	1.3084	3.87693	1.78657	3.17492	1.72021	3.78176	1.63901	3.72771	1.92031	3.22538	1.7096	2.46845	3.59619	1.81397	1.89515	3.69397	2.49223	2.03101	1.90088	2.79845	2.56387	2.34664	1.87598	1.91208	0.361515	0.256184	3.15508	0.785085	2.3802	1.63259	0.593288	2.55083	3.20317	1.26708	2.61422	1.72201
ADAM6	1.38269	0.915657	2.0676	2.23925	3.67428	2.63115	2.97742	1.75121	2.39402	3.40596	1.9292	2.11544	1.96206	0.749404	0.477688	0.332751	3.68246	1.77967	0.748492	1.29381	3.59619	2.73287	1.37864	3.65174	4.11314	3.29749	1.86408	1.77784	2.29517	2.79292	1.92031	1.78331	0.854376	2.09899	1.68457	2.45675	3.46122	0.542657	3.38085	3.00096	1.00511	4.4093	3.78578	3.71631	3.05293	3.46075	2.93365	1.36227	1.74505
ADAM7	1.18644	1.16069	1.24336	1.24279	1.19531	1.19927	1.20615	3.36838	0.0357145	0.214396	0.884807	0.279257	0.616911	1.27016	1.86253	1.31732	1.3667	1.1693	1.65238	1.2349	1.86332	1.24336	0.413858	0.424199	1.56611	0.880387	1.02822	0.914151	1.55243	0.560562	0.371276	0.242291	1.20327	-0.0691528	1.05971	1.46247	0.0788589	1.15252	0.451505	1.53283	-0.0730405	1.13541	0.830696	1.02955	1.22693	0.760188	0.28029	1.71139	0.459827
ADAM8	4.66188	3.74945	3.8457	4.89094	4.47678	4.13932	2.81094	4.42603	4.57715	2.6396	3.12074	4.44086	2.9524	2.22826	4.29048	4.21439	3.65785	4.4305	4.75207	3.00435	4.14624	3.7983	2.29861	2.68791	3.00992	2.83402	2.34791	3.90511	3.11951	1.84136	3.46389	2.8256	4.33761	1.68008	4.38892	3.59568	5.10004	2.50859	4.99512	4.1073	3.65785	4.25915	4.4387	3.50091	4.04347	2.52506	4.1104	3.88565	3.85331
ADAM9	8.1322	7.75499	7.86003	7.59523	7.57793	7.57125	8.7629	8.27143	7.35472	7.83554	8.01653	8.57078	8.51335	7.12894	8.03993	7.75363	8.18035	6.86521	7.57359	8.32137	8.25697	7.71728	8.18414	7.83178	7.91344	6.96718	8.5606	7.70248	8.14557	7.80261	7.92414	8.12032	6.59809	7.47201	7.51508	8.08747	7.05952	7.75094	7.87026	7.77678	7.47882	8.12795	6.60845	7.39942	7.4263	8.24637	6.84953	7.63999	8.39947
ADAMDEC1	1.7633	3.03378	1.31669	1.69321	2.8986	2.66107	4.19944	2.73721	3.38591	2.76226	3.36188	3.0947	3.13042	1.60287	4.42462	4.48295	4.1981	3.94464	0.546272	1.6875	2.1751	0.994889	2.31943	0.249287	1.75179	2.9524	1.73155	1.77719	1.92588	2.098	1.95268	1.77335	3.56408	4.20887	3.51029	1.80008	3.0497	1.85204	5.22249	6.06336	1.48735	2.78165	1.24781	4.28	3.85227	3.0887	3.21922	3.21026	4.92185
ADAMTS1	7.59581	7.31128	6.07477	7.28987	6.68871	6.6341	6.66204	7.02862	6.80899	7.878	8.18688	6.86788	6.04102	7.48699	7.61375	6.11448	6.66864	7.34379	7.269	8.09154	8.09542	7.03149	7.1992	7.77207	8.2872	6.46581	6.52271	8.28998	7.49663	7.30338	8.07487	6.3542	8.15771	7.75298	6.30419	6.35493	7.11527	7.03002	6.21089	6.69677	6.28787	6.65946	5.90234	6.20027	6.60889	6.51924	8.38777	6.22853	6.43851
ADAMTS10	1.7433	5.10431	5.13301	3.32345	4.86331	4.55369	4.7943	4.61136	4.06162	3.71845	4.91626	3.31757	4.61222	4.89672	2.53979	5.25548	4.46947	4.22064	4.80531	4.62299	3.60443	5.0007	1.69892	4.69886	4.8139	4.14216	3.87371	3.46886	3.81119	4.46123	4.35404	4.0896	4.97822	3.75999	5.32853	4.04495	5.07361	4.01175	6.3793	3.45915	5.56324	4.10913	4.49477	3.29433	5.21867	4.29605	7.03002	4.37755	4.55807
ADAMTS12	4.31684	3.91326	4.37491	5.0413	3.95286	2.62935	4.22337	4.20171	3.21541	3.91417	4.90545	5.10194	3.7402	4.38284	3.97308	4.47796	3.92764	4.5066	2.85308	4.37582	3.06864	4.55899	4.0079	4.34389	4.72127	4.28204	3.99545	3.85131	4.10861	4.11712	4.38766	4.04152	4.77006	4.30487	4.37977	3.8191	4.4233	4.30397	4.7496	1.76949	3.79882	4.13759	4.51336	4.21574	4.59117	3.51687	4.8857	4.54773	4.09362
ADAMTS13	1.66494	4.69575	3.86957	1.71957	1.65902	1.66249	1.66619	1.67098	1.52241	1.31615	1.6216	2.18007	0.834029	2.00086	4.55549	1.63433	1.38091	1.1112	2.95546	0.64039	1.54458	1.80328	2.93056	-0.503837	1.09986	1.03091	3.35674	1.15667	2.17023	3.42817	2.71044	3.47874	3.3985	0.788619	1.91208	2.57761	3.07974	2.79047	0.992873	3.61525	2.67842	2.58713	1.75121	1.31781	1.37691	2.87994	1.94069	1.61247	1.58528
ADAMTS14	4.20265	4.74916	4.66488	4.88892	4.57199	4.52146	4.72381	4.29346	4.66268	4.63889	4.36949	5.57551	4.70193	5.34738	3.41448	3.65271	3.17686	5.37881	4.81223	5.67841	5.5762	5.52869	6.02845	4.61267	6.55145	4.90393	4.4013	6.30903	6.11411	5.09857	5.04169	4.31987	4.44217	4.01689	5.67342	4.8753	3.57577	5.27972	3.63915	5.36742	4.05826	3.71155	5.77782	3.34183	4.97269	4.63431	5.48091	4.61022	4.38594
ADAMTS15	5.91678	5.27131	6.07876	6.8802	6.52165	5.68466	6.02523	5.89676	4.53254	6.07612	4.78229	5.36972	4.3841	5.69174	5.79256	5.06745	5.7804	5.85647	5.17697	5.48803	4.84597	6.54182	6.49167	5.87215	5.66929	5.86008	4.53172	5.26542	5.6875	4.90228	4.684	4.51927	5.93271	4.89635	4.55765	3.16295	5.81366	5.17227	4.89018	3.60979	4.6385	3.97804	5.18569	4.18306	4.68815	3.78266	4.74384	4.70111	5.0662
ADAMTS16	1.37316	3.48211	1.42824	1.42128	1.37917	1.37081	1.3678	1.38738	1.025	0.696546	0.131626	0.260655	0.383943	1.27077	1.20032	1.25617	0.771996	1.23757	1.00246	1.39248	1.273	2.44292	0.906214	3.16037	1.0626	1.55645	0.953347	0.898692	0.981269	1.21479	0.941916	0.952068	0.943244	0.708856	3.1781	1.07623	1.14373	1.03551	1.06151	0.66059	1.00041	0.969535	1.46197	0.53291	0.725957	1.99805	1.88433	0.510701	0.995546
ADAMTS17	4.13759	2.87321	2.81579	3.79687	2.84193	2.47419	3.3905	3.55729	3.98333	2.59934	3.49383	3.23743	3.51687	3.11059	4.23193	4.21169	4.55851	1.76831	3.51029	2.38703	3.79125	3.30218	4.04593	2.92179	2.26211	2.64232	1.87735	3.40394	4.21614	4.45594	4.13678	3.03006	4.53033	1.73155	3.02	5.05607	3.39698	2.14647	2.17635	3.09335	2.43428	1.26049	3.66406	4.11758	2.82647	3.96473	3.39456	2.85506	3.24722
ADAMTS18	4.41452	3.28343	2.68122	2.85655	2.66015	3.82411	3.56677	3.59524	3.68744	2.84949	3.90422	4.49315	3.99545	4.00206	3.4034	1.57084	4.03978	3.69957	3.76645	3.79323	4.0411	1.34121	2.01337	1.91945	3.79125	3.78531	3.85331	3.37398	3.4928	3.5474	5.63327	3.41291	3.05631	3.68006	2.92767	3.69957	3.47327	4.30259	3.72934	3.59058	3.7983	3.88282	3.57781	4.12464	3.41936	3.95664	3.65068	3.95037	3.58859
ADAMTS19	0.755766	0.679428	0.800243	0.787751	0.724086	1.86696	0.750443	0.787751	0.820752	1.62211	1.42076	1.54975	1.26215	1.4789	0.326483	0.669383	3.53271	1.03947	0.282647	2.92474	0.936433	1.35418	1.28953	3.92069	0.69469	0.977151	2.61422	1.85607	2.42291	1.0497	1.74622	1.44537	0.180597	1.47168	1.9884	1.00511	0.808611	2.81417	2.6953	1.28895	1.12646	0.101253	0.551327	1.82849	1.24443	1.80461	1.16192	0.339294	0.197018
ADAMTS2	1.29495	3.10574	2.63206	1.346	4.51802	4.09599	3.30862	3.46449	3.31757	1.77719	3.27629	3.43658	3.34131	2.6655	4.98618	3.89231	2.96088	2.3489	3.61623	3.68006	2.42619	3.76592	0.697605	1.80531	2.87106	3.69602	4.17668	3.96473	4.33483	3.48724	4.71277	3.75558	4.32556	5.30071	3.87371	5.23153	3.99864	3.74176	3.69163	3.34008	1.4555	3.81591	2.28919	2.0582	2.63309	3.39163	3.40545	1.8374	6.59524
ADAMTS20	2.25277	2.25391	2.60488	1.82849	2.53659	2.53878	2.36891	1.67877	1.47451	1.94164	1.69719	1.92588	1.04592	2.86552	0.256184	1.03876	1.37316	3.16557	2.49333	2.09263	4.24462	0.197018	2.31341	2.69616	3.96371	2.80507	1.79227	1.72865	2.06635	4.1026	1.8374	1.73155	1.35754	2.80274	2.79208	1.79898	-0.177119	2.56972	1.55472	2.72124	1.73155	2.91754	1.61298	2.7168	1.93177	2.96303	1.9024	2.44717	2.12893
ADAMTS3	3.60054	2.86391	4.33761	3.19418	3.66937	3.39163	3.7983	2.64048	3.16228	3.56054	4.3586	3.78483	4.41754	1.26963	4.48719	3.69602	3.20833	3.48611	2.337	3.97214	4.35404	3.34071	0.541108	3.68155	3.40545	3.15984	2.0676	4.66188	4.04982	4.27001	3.81639	3.22658	4.01254	4.25864	2.8516	4.22829	1.77218	3.54485	3.84524	3.72005	3.51837	3.68246	3.85171	3.72353	3.74273	1.50071	3.12744	3.62762	3.87648
ADAMTS4	5.51823	4.68565	5.50836	5.79908	4.96666	4.54851	5.1995	2.89476	4.18866	4.89483	7.57728	4.45948	4.31391	4.55989	6.43126	5.14258	4.46907	4.89283	5.84557	4.22571	4.67004	4.87977	5.03562	4.86148	4.63973	5.14654	3.34725	6.91241	5.80251	4.45143	5.98392	4.78108	4.64493	3.39517	3.86463	2.7168	1.57197	5.1073	3.06486	4.47556	4.58826	4.96538	4.45238	4.82737	4.70639	4.89058	5.6875	3.28169	4.68975
ADAMTS5	5.52252	5.29679	5.85473	5.36308	5.66132	5.69238	5.89779	5.15228	5.13873	5.69342	5.89127	5.81857	4.78186	5.74033	5.71235	4.76009	5.98095	5.09663	4.73139	5.45829	5.7852	4.549	4.55851	5.9568	6.10242	5.26463	5.39934	5.09896	5.41107	4.30532	6.2013	4.77255	4.76584	4.2896	5.63399	4.00657	6.74435	6.05973	5.61506	5.16214	5.59659	5.26383	5.43365	5.4939	6.25528	5.34054	5.02671	5.27932	7.63049
ADAMTS6	3.16927	3.27743	3.07974	3.71155	3.64969	3.45235	3.75692	2.71762	4.1104	3.53432	3.46225	4.95914	4.28039	2.76314	3.58162	3.62473	4.00657	2.34445	3.82011	2.94216	3.64518	3.60114	4.04251	3.83701	3.97174	3.57946	4.30087	3.07508	3.36545	3.18482	3.17362	4.17815	4.16012	4.04251	3.13683	3.16158	2.63574	3.68061	4.14579	3.43939	3.85131	4.11416	4.51626	3.93371	4.06968	3.20083	3.01736	4.2507	3.98908
ADAMTS7	4.26047	1.66796	1.76035	1.76634	3.90332	4.4163	5.02188	3.38146	4.05826	3.33664	3.95139	3.97995	3.09672	3.92812	3.63608	3.66099	4.65976	3.18295	2.43791	4.28416	2.64922	3.44718	1.94164	3.31817	5.24141	2.66641	3.68449	3.77154	3.57324	4.12506	3.5866	4.4004	2.47664	2.0828	3.66784	0.613202	3.74176	1.38032	3.54167	3.37966	4.01502	3.67472	3.35738	1.35203	4.35312	1.63316	4.47839	1.22315	2.42846
ADAMTS8	1.44164	4.39677	1.48941	3.47485	4.25733	3.49383	2.5009	1.994	3.69352	1.99116	1.37979	2.27182	2.37257	4.11134	3.80867	3.74481	1.34341	1.79358	0.861312	4.4013	3.05356	3.81782	3.19834	3.77771	4.14715	4.80278	1.35203	3.55562	5.39175	4.28246	3.38988	0.959612	2.74919	1.84857	0.848305	1.15368	3.03819	2.04997	2.36559	0.968856	2.51403	1.25831	1.67156	0.552976	2.64747	-0.0306192	3.72005	2.54597	0.0788589
ADAMTS9	5.48473	5.54535	4.90271	4.99155	5.20817	5.76739	4.8188	4.85345	7.40174	5.10319	4.8337	4.55718	4.11088	6.65903	7.14317	4.3881	4.92461	4.61779	4.81997	6.27347	6.05778	5.44008	5.92322	5.55617	5.63193	6.07646	3.89517	7.15757	6.13692	4.34075	6.14499	4.59543	4.5019	4.16344	3.45459	4.15064	3.99545	3.83346	4.44847	3.76395	4.0308	3.90658	4.43403	4.14973	4.10492	3.51141	6.51119	3.65271	4.73316
ADAMTSL1	1.39817	1.36564	1.45231	1.44276	1.40705	1.39698	1.39756	1.41316	1.24443	1.26708	2.93445	3.12857	1.31129	0.0867757	2.37257	1.54063	1.15073	1.62676	1.78265	0.135385	0.204593	0.850697	1.41528	1.56611	2.12893	1.15537	0.886933	1.33597	1.01007	0.909276	1.1841	1.39137	2.36891	1.69719	1.77082	1.97972	1.26807	1.70249	1.58377	2.55083	1.52962	2.8647	2.25277	-0.19264	0.173358	1.05779	1.44041	0.254062	0.594737
ADAMTSL2	1.72559	1.68392	1.77403	1.78265	1.71192	1.71493	1.71255	1.72865	0.684739	0.623771	1.10111	0.135385	1.02623	1.54975	0.80109	1.18124	1.02048	1.11724	1.5127	1.59576	1.25781	1.00637	1.63839	1.41579	1.06095	1.1087	0.786788	1.07258	0.946592	1.35092	1.2355	1.74442	1.23038	1.59704	1.25995	1.83044	1.00309	1.16655	1.36175	0.795586	2.22254	1.025	1.50336	0.534869	1.64261	1.50171	0.984691	0.850697	0.993462
ADAMTSL3	4.12142	5.91615	3.81782	5.45865	5.85195	5.78799	5.91167	6.02377	4.00206	3.7422	4.58826	3.57115	3.77048	3.20614	3.11336	4.04066	3.89376	3.67613	4.71673	3.71529	4.27808	4.18524	3.81304	3.87841	4.13103	3.61825	5.3119	3.28723	4.11798	3.96274	4.75454	3.88329	5.41775	5.45263	3.57892	4.21169	4.5433	3.87986	3.88418	4.49619	4.24373	4.10771	5.7785	4.73693	4.53254	3.79222	2.61422	5.46665	3.55675
ADAMTSL4	5.19822	4.63515	4.65816	6.89082	6.10702	3.00656	4.67557	4.98577	5.12847	4.69138	4.33441	5.04013	5.49536	4.88409	5.79696	3.06486	4.67759	5.13035	4.52505	5.78178	5.034	5.18525	6.25567	4.56554	4.45729	5.44882	5.35309	5.34018	5.10083	5.89019	5.14146	5.25432	3.74377	3.9408	4.64947	4.61267	4.32874	4.68142	4.3807	4.10133	4.56947	4.809	4.66358	6.03664	4.81097	5.44661	3.29493	4.72429	5.4382
ADAMTSL5	1.47505	4.68311	2.69336	3.19226	2.69616	5.3369	4.14757	4.25864	1.3471	2.82062	2.76398	1.89844	1.31504	3.56948	5.84557	4.92038	3.88669	1.20086	1.73618	3.32919	3.79882	4.03646	4.9854	1.30369	1.09122	3.77871	3.8727	2.9524	4.1201	2.36004	4.04152	3.98228	-0.0333132	4.45503	2.5418	3.32978	4.28374	4.73267	3.23118	2.34664	3.81263	4.26915	1.33261	4.76137	1.10177	4.39863	5.20294	4.74791	1.37691
ADAP1	6.28718	5.47029	5.84523	4.7483	5.62463	5.72367	5.18913	5.42881	5.99144	6.38094	5.2266	5.54726	5.20782	5.92996	5.64367	5.3141	5.6063	5.4751	5.49601	5.60833	5.68861	5.30104	6.3542	4.99719	6.49776	5.89398	6.06774	4.99914	5.04013	5.10119	5.39131	6.07912	5.71898	5.69743	5.96732	6.57272	5.36168	5.4939	6.16537	6.056	5.71898	5.18569	6.21557	5.28545	6.59767	6.14615	6.08731	5.94983	5.57883
ADAP2	4.60978	5.41244	5.15111	4.89136	5.13564	4.68055	4.59501	5.10279	4.34125	3.89231	5.14182	5.08194	5.35904	4.4004	4.80531	3.87693	4.19984	4.91543	5.07441	5.70117	5.62823	5.14694	6.02768	5.17968	6.0981	4.72381	3.11513	4.1808	4.0145	3.12253	4.92699	3.20833	4.64904	4.62001	5.07361	4.20748	3.96274	1.89597	4.65189	5.16948	3.65023	3.52059	2.11643	2.71762	3.68954	2.12556	3.57468	3.94412	7.99921
ADAR	7.28674	8.29104	7.55291	7.53539	8.22196	8.39741	8.04535	8.14057	7.70321	7.60991	7.88781	7.6124	8.88947	7.45418	7.72592	7.79156	7.85231	8.08666	7.97564	8.08495	7.99595	7.35528	7.66589	7.75579	8.14131	7.50108	7.4942	7.83261	7.84259	7.41109	7.70844	7.22975	8.34384	7.8341	7.78883	7.30618	7.73311	7.20273	8.38875	8.07487	8.00245	7.69939	7.64297	7.56753	7.92414	7.37648	7.64238	7.87171	8.45058
ADARB1	4.35359	4.73772	4.6511	3.78689	3.88861	4.76413	4.60448	3.99498	3.41615	3.64564	4.59543	4.58062	4.00977	4.10684	3.76247	3.97506	4.26915	3.73187	4.64316	4.19144	3.4992	4.36529	3.63462	4.24022	4.04593	4.27231	4.3807	3.96322	4.9825	4.09001	4.65976	3.97995	4.3841	3.22175	4.02091	2.26689	4.57666	4.19454	4.36039	4.27091	4.7247	4.35763	4.29735	3.60927	4.36949	4.24788	5.42103	3.99726	3.76395
ADARB2	1.68697	1.64623	4.43708	1.74442	1.67939	1.68063	1.68392	1.69206	2.39501	0.265505	0.899365	0.907022	0.703802	1.35629	1.71314	1.94409	1.68327	1.11888	1.39479	1.40993	1.51465	1.4926	1.50633	0.727993	0.51292	1.07935	1.17526	1.27199	2.01417	3.02945	1.87371	1.61759	0.181551	2.1144	1.1295	1.23162	2.14647	1.08127	0.255085	0.764614	1.81518	1.94069	1.24224	2.83806	0.856648	1.54522	1.14851	0.973545	0.693607
ADAT1	5.20329	5.05773	5.61008	4.67932	4.40889	3.85426	4.96868	5.33611	4.15064	5.90021	4.98706	4.64617	4.8374	5.46502	4.38508	4.90473	5.16254	5.69002	6.12511	4.32071	5.91241	3.2428	4.42913	5.24141	4.75124	5.86989	4.59367	4.51969	4.61097	4.75651	4.90249	4.84028	4.71318	5.15715	5.19586	5.66548	5.37596	5.23427	4.43955	5.01001	4.43183	4.89483	5.16486	4.95134	5.32529	5.20643	5.19266	6.05634	5.14378
ADAT2	4.41351	4.74384	3.03819	3.41504	4.59117	3.77468	3.37575	3.23009	4.02602	1.9244	3.55327	3.30681	3.84426	2.98083	3.81639	3.68954	3.65989	3.51141	4.73491	3.51892	2.44959	3.85531	3.30464	3.56839	2.26332	3.06798	3.91277	4.19196	3.90192	3.28779	3.66156	3.69059	4.16757	4.3122	3.86136	4.62691	4.1073	3.5999	4.21439	4.43274	3.60271	2.36328	3.95706	2.30849	2.83025	2.95089	4.50228	3.9852	3.9147
ADAT3	2.08701	4.64988	3.31052	4.57454	2.92038	4.48211	1.6023	4.02515	5.27164	4.23877	3.97458	3.47327	4.11271	3.74792	3.5999	3.82509	3.10233	3.70632	3.8774	3.41553	4.33937	4.10542	3.70315	3.90099	3.14934	4.05593	3.35922	5.12256	4.41452	4.46778	4.95501	3.98088	3.37575	4.33809	4.00831	4.60194	3.11202	4.14351	1.60349	4.90271	2.91201	4.94164	3.10057	4.65399	1.6187	3.76592	3.50146	2.85941	4.46618
ADCK1	5.39502	5.06858	5.93965	3.40769	4.69228	5.41071	5.01001	5.57083	4.98665	4.49477	5.28239	6.50535	4.15923	5.10153	3.1438	4.95987	5.12033	5.86076	5.53415	4.6106	5.00682	6.0363	5.74738	5.12256	2.91964	5.25241	5.38762	4.60936	5.88603	6.29932	4.90192	6.16953	4.94879	5.62317	5.30506	5.21227	5.40483	5.65804	5.20294	5.41544	5.13914	5.36972	5.31866	5.41507	5.47336	5.73759	5.08634	5.81297	5.03895
ADCK2	5.37815	4.58948	5.25279	5.61791	4.96705	4.96789	5.4537	5.18116	4.61267	5.23262	4.71413	5.4787	5.43645	4.91507	4.8192	5.19049	4.40617	5.11993	4.98291	5.43645	3.86666	5.06745	5.30839	5.24523	4.14532	5.24748	5.13758	4.62651	5.36781	5.92598	4.86544	5.53709	4.93883	5.09703	5.68165	5.52439	4.80609	4.48295	4.96115	5.20218	5.1477	4.82445	4.86503	5.44661	5.30506	5.36234	4.40437	5.86222	5.10431
ADCK5	3.8375	4.63553	3.50348	3.70315	3.70215	4.51086	4.89136	2.10888	4.43955	3.8808	2.49333	4.34708	3.81403	4.91466	3.88468	1.69502	2.61054	5.18405	1.46906	2.73033	3.45062	2.56188	3.68105	5.51738	4.05272	3.7999	4.03748	2.09371	3.45963	3.31278	3.23362	4.23059	5.66686	3.25197	5.70694	2.02371	3.23606	1.13305	3.76892	1.30208	3.16927	1.75844	3.42047	2.82221	3.10717	4.74597	4.09948	3.43227	2.09371
ADCY1	3.96185	3.43172	3.54436	3.34671	4.29959	4.25118	3.9172	3.92171	4.50228	3.10916	3.55623	3.40394	5.34708	3.2271	3.56731	4.5066	3.59831	3.35461	3.00578	3.55881	4.01546	4.50154	3.60548	4.53512	4.20981	3.46449	4.33761	5.11136	3.3262	3.75942	4.38854	4.11467	3.66099	2.65314	3.31872	1.47683	3.47813	3.3262	4.65936	3.14687	4.06499	3.61358	3.68896	1.50393	2.57286	2.53458	1.89844	2.95163	2.93804
ADCY10	3.57781	2.40949	3.9342	2.26575	2.81417	0.824176	3.00724	4.0308	1.99498	1.64377	3.05026	1.40823	2.66284	3.15744	4.22619	3.6588	2.92837	1.85134	0.355729	4.09098	1.98251	0.909276	2.15112	2.39062	3.83882	2.69437	1.8332	2.85025	2.04065	2.29987	5.20643	2.8428	2.06635	0.775502	2.77428	3.80528	3.05026	2.06635	2.93878	1.14905	3.00096	2.88941	0.761925	2.55772	3.49972	3.80419	2.06881	3.09406	1.59636
ADCY2	3.52733	0.549595	2.87775	4.14973	2.10535	4.14304	3.61525	3.68649	2.06439	4.0508	3.63859	3.06486	1.60121	1.3026	3.94464	0.244151	3.80419	4.63158	3.06168	4.10218	3.71473	2.78716	3.54436	3.76592	1.89678	3.70315	3.44327	2.87106	3.74128	3.9852	3.90658	3.14508	4.37927	2.65732	2.48225	3.57832	3.12136	2.11961	4.03129	3.3854	1.5127	2.70007	3.72668	3.84123	3.33664	4.2568	3.78578	3.72771	3.1231
ADCY3	5.56639	5.68679	5.6824	5.99525	6.32979	5.67877	6.05705	6.22672	6.46744	5.33239	6.61759	6.06192	6.45954	6.38327	5.78313	5.84052	5.49635	5.71514	5.12419	6.48699	6.15785	5.97808	6.57561	5.90541	6.63208	6.55658	4.8762	6.08731	6.19306	5.38352	6.39324	5.50124	5.9274	4.9363	5.78625	5.37229	5.72293	5.40916	5.62003	5.12296	5.81229	4.6086	5.57083	5.56675	6.05165	5.14847	5.18078	5.03443	6.11127
ADCY4	1.34652	6.98849	5.88951	5.81717	6.56138	4.92699	5.91746	6.35918	6.09736	5.55188	5.71129	4.84555	5.01314	4.90887	5.4678	5.11016	6.57441	6.43015	6.04425	5.12768	5.61361	6.60622	6.33099	6.2821	6.27658	5.57196	4.89483	5.63442	6.43527	5.17812	6.24822	5.75435	6.25455	4.74873	6.42187	4.50074	4.09049	2.55999	6.04578	5.34524	4.91137	3.60329	5.7008	3.71901	5.97125	5.19161	6.96447	4.58597	3.51085
ADCY5	5.79048	5.82296	5.2559	4.79996	5.98921	5.82157	5.92668	6.23142	6.04017	5.79527	6.87356	6.57561	6.61232	5.07292	4.69099	5.50983	5.24066	5.99256	5.73687	4.85298	4.55549	4.62469	5.16672	6.41767	5.85575	6.04727	6.17753	5.52644	5.08835	6.73973	5.19868	6.31739	5.91464	6.13397	6.71481	5.95381	6.60287	5.88918	6.14902	5.75835	5.82969	5.38383	6.6449	5.9995	6.03169	5.269	5.23954	5.51082	4.80774
ADCY6	6.42292	6.6009	6.22359	5.40883	7.33778	5.58487	6.77228	5.35347	7.32474	4.90928	5.30431	5.34164	6.6281	6.09152	5.80813	5.48878	5.83545	6.56636	6.45314	5.86222	4.91869	6.1575	7.08936	5.8658	4.81721	6.56216	6.77305	7.43234	5.62856	5.48765	6.43159	7.18768	6.08534	7.54863	6.02626	6.27919	5.7807	6.23218	6.80687	6.93636	5.97055	6.53505	5.9531	6.26015	6.09995	6.25752	7.36715	7.02202	4.34792
ADCY7	4.25534	5.41354	4.42294	2.79371	5.21227	4.02091	4.1706	0.65833	4.17196	3.48787	4.20845	3.73441	4.82889	3.35738	4.13759	3.00926	4.14216	3.9056	4.34209	5.21311	5.94983	1.86181	5.32023	4.17815	5.47472	3.66888	3.84841	3.64676	4.03646	3.16557	4.11798	3.55832	4.30716	4.19758	3.09143	4.58452	4.9336	4.01352	4.54984	5.8311	4.01119	4.18388	4.03931	4.65029	4.37842	4.42731	4.13639	4.49395	7.20273
ADCY8	1.46753	1.43121	1.51465	1.51748	1.46527	1.46298	1.46298	1.47683	2.69724	2.01337	0.981269	1.25218	0.970742	2.50203	1.04592	0.709881	3.65374	2.53777	1.25116	2.95882	1.7765	1.15778	1.34762	1.23919	1.3128	1.87522	1.35754	1.41688	1.38449	1.62736	1.278	1.33891	0.926937	2.26575	3.3614	1.42763	2.91487	-0.132587	0.845128	2.60871	3.14627	1.18928	2.14647	0.178667	1.24946	1.56709	0.709881	1.12412	1.37081
ADCY9	6.89956	6.92796	6.90395	6.65946	7.28773	7.12709	7.07639	7.3107	6.98994	6.73928	7.17952	6.71564	7.36086	6.70763	6.50578	6.60171	6.5679	7.137	6.85369	6.39089	6.36029	7.28932	7.07507	7.17455	6.64125	6.45827	6.65528	7.07261	6.4146	7.09272	6.91852	7.37235	6.24192	6.22246	7.26845	6.16654	6.47246	6.55658	6.96261	6.45001	6.56508	6.73135	6.65043	6.7669	6.80041	6.76347	6.46622	6.46506	6.28941
ADCYAP1	1.57985	1.54063	1.63035	1.63316	1.57245	1.57509	1.57245	1.58528	0.0235302	0.181551	1.0484	1.18528	0.759336	0.740533	0.731633	1.39698	2.098	1.43831	1.67755	1.94491	2.79598	0.770177	0.861312	0.86671	0.957005	2.93581	0.395111	0.77457	0.962128	0.573518	1.40823	0.843453	0.635066	1.46906	0.181551	0.864366	2.17371	0.937905	0.977151	1.74266	1.2349	1.1081	1.52681	1.18	0.666324	1.03287	0.474211	1.24155	0.217317
ADCYAP1R1	5.09589	4.85895	4.96247	4.84153	4.11362	4.09411	4.71959	5.01714	4.6798	4.57626	4.97269	5.47409	5.23918	5.17731	4.54456	4.81839	5.20677	4.95583	5.15228	4.22337	3.84841	4.75207	5.18612	5.00035	4.1026	4.30753	5.20218	4.50699	5.14963	4.56432	4.7496	4.95542	4.55588	3.48002	3.80419	3.57165	4.87074	4.89598	4.09362	3.51954	4.85895	4.46863	5.28896	4.36126	4.30532	3.94752	4.06254	4.36039	3.93508
ADD1	8.28902	7.92182	7.82532	8.08406	8.26216	8.00158	7.69748	7.95331	7.79506	7.54164	7.94415	7.762	7.73311	7.4357	7.35972	7.62101	7.71528	7.77406	7.86433	7.70321	7.40812	7.73647	7.71673	7.70248	7.69305	7.65041	7.47474	7.57297	7.46379	7.83034	7.98968	7.88566	8.0667	8.05117	7.82396	8.01418	7.94553	8.10803	7.88426	7.97252	7.75996	8.09461	7.92414	7.94951	7.95089	7.94059	7.85019	7.66906	8.22567
ADD2	3.95375	3.41004	3.68799	4.15464	4.04593	3.41233	3.13746	3.20019	4.08132	3.35738	4.62564	4.38854	3.42935	3.08041	3.92362	4.01902	4.32977	3.63513	3.60649	3.70063	3.39801	4.55029	4.44577	3.80721	3.87012	4.30087	3.71582	4.21439	4.07198	4.12773	4.02046	3.83202	3.79272	3.18983	4.38854	3.72771	3.19719	3.83486	4.07623	3.92725	4.17618	3.97995	3.8227	4.32977	4.52947	4.23658	3.83976	3.79741	3.56475
ADD3	9.0746	8.89576	8.77555	9.18421	8.98675	8.81333	9.13673	8.75406	8.44604	8.874	8.75281	9.17817	8.724	8.40976	8.31676	8.55612	8.94832	8.89239	9.01959	8.72674	9.09995	8.41344	8.76702	8.72282	8.66593	8.66096	9.01959	8.40247	8.17325	8.88297	8.3448	8.87837	9.26133	9.16661	9.06157	8.98334	9.32313	9.20088	9.12538	9.04534	9.06911	9.21413	9.04534	9.11835	9.04161	8.93691	9.0559	8.7974	9.05063
ADH1A	3.90238	4.17815	3.26804	4.70475	4.65399	3.65583	4.33304	4.34209	4.13335	4.81312	5.012	4.86829	5.00035	4.18625	3.0396	4.42824	4.81012	4.41546	4.84683	3.72154	3.30282	4.82445	4.7704	2.97895	4.35145	1.79898	4.14674	3.5943	3.17178	5.59027	4.99951	4.20036	3.76645	4.83208	4.33157	3.57424	4.8139	4.14073	5.09857	4.04542	4.15699	4.75573	1.24887	4.34167	4.38854	4.97269	3.76998	3.39517	5.66229
ADH1B	7.88915	7.66205	7.07639	7.58355	7.76332	6.64369	7.26639	7.62418	6.69381	7.70844	7.79506	7.64745	8.28619	6.98661	7.27403	6.65361	8.48538	8.28902	9.4215	6.543	7.01584	7.0163	7.45486	5.67763	6.73179	5.91857	7.32429	6.12084	5.34275	8.7324	7.74256	6.80817	8.18131	7.68706	5.95966	6.2845	8.19144	7.7845	6.51999	7.14911	7.79506	7.77067	7.56156	6.82911	7.33214	7.80057	6.97881	5.9338	9.48731
ADH1C	5.91615	4.20661	5.11016	4.83169	4.77214	4.89361	6.46147	5.08835	3.51085	4.97665	5.96146	5.05643	5.82122	1.71957	2.94069	5.42166	2.74333	6.18801	6.47799	5.67342	6.10855	4.77391	4.23518	4.43788	5.91398	1.66978	4.33532	3.30631	3.36488	6.89376	5.74347	4.53383	4.70897	1.3	3.90192	4.10542	4.9746	4.86503	4.33585	1.50281	4.98103	4.38945	4.71716	4.73267	6.71023	6.05778	4.0969	2.90307	7.79299
ADH4	3.76645	3.68291	2.87919	3.50146	2.83729	2.52928	3.37121	2.38136	2.99814	2.64048	3.00926	3.35922	3.66888	1.86998	2.04065	2.33568	3.51085	2.61974	3.50743	3.47813	2.36559	2.77582	2.88657	3.61241	2.97742	4.51214	2.86391	3.58599	3.04696	3.75274	3.80924	2.97393	3.69115	3.74426	1.75244	3.38195	3.61358	2.24198	3.35674	3.3389	3.91417	3.2895	3.06736	3.14687	3.51954	1.95518	1.77403	3.4633	3.09604
ADH5	9.33864	9.55371	9.23667	9.51355	9.31143	9.36148	9.51355	9.45734	9.02305	9.35201	9.10369	9.42408	9.55097	9.39432	9.02305	9.35466	9.28108	9.27869	9.06727	8.92883	8.89742	8.80341	8.98148	9.45734	9.12192	9.0316	9.54362	9.12717	9.16661	9.12032	8.80468	9.35929	9.46967	9.49212	9.73935	9.38772	9.77033	9.51084	9.72034	9.39215	9.80495	9.39886	9.80191	9.72723	9.44781	9.37048	8.9585	9.65817	8.70918
ADH6	1.42651	1.39365	3.1438	1.47168	1.43277	1.42234	1.42549	1.43716	0.56863	1.43831	1.43612	1.09188	1.43277	1.01988	0.217317	1.3592	1.03152	0.583443	2.1355	0.0573333	2.72855	1.62393	0.293945	1.42352	1.25934	1.24887	1.71615	0.897815	1.78721	1.0645	0.936433	0.920135	1.6572	0.750443	1.67813	1.7439	0.766466	1.66619	1.04077	1.13891	1.59576	2.34664	-0.169719	1.77967	1.88608	1.55587	0.196141	1.05407	0.266393
ADH7	3.72353	3.75692	3.94324	3.28565	3.7551	2.98016	4.2216	-0.551169	1.89678	4.01219	3.07068	3.73187	3.58433	1.32198	1.6584	4.80729	3.03441	1.30315	3.4089	4.23754	1.3747	1.66556	3.91517	1.791	4.99072	4.36722	3.55222	2.94494	3.58433	3.1243	2.99117	2.65314	3.59524	3.02351	4.92777	1.9136	4.40437	4.54809	4.34167	1.77082	1.38091	4.16393	4.65775	1.34394	3.69501	2.1597	1.4018	3.8018	3.62097
ADHFE1	7.30786	7.81071	7.6917	7.99527	7.87171	8.14474	8.11213	7.98743	7.71595	7.94415	7.83843	7.87092	7.59115	7.96632	7.67178	7.96632	7.90546	7.93142	8.03837	7.82462	7.39029	6.98849	6.68037	7.81268	7.2556	7.86569	8.3459	7.32378	7.55525	7.87593	8.12875	8.3702	7.73647	8.30699	8.65305	8.38008	8.1879	8.11931	8.31762	8.0684	7.91263	7.85857	8.19668	7.8289	7.30085	7.48645	8.76702	7.71164	7.27233
ADI1	9.45734	9.90458	9.59239	9.20523	9.37048	9.38002	9.47489	9.82591	9.66883	9.32997	9.96467	9.76138	9.54362	9.60248	9.60248	9.59733	9.45277	9.85368	9.83235	9.50264	9.18015	9.19028	9.02637	9.6826	9.44781	9.35705	9.61486	9.23456	9.53148	9.77919	9.47489	9.76138	9.054	9.07967	9.65526	9.35929	9.65526	9.1883	9.2411	9.288	9.82276	9.62611	9.83525	9.68752	9.98269	9.83855	9.03314	10.0069	9.29682
ADIG	3.02726	4.47796	2.88435	1.1473	2.97742	1.11369	1.10944	2.1585	2.24785	1.32315	1.45648	1.4975	2.42198	0.51292	1.66494	1.27585	4.378	0.240313	0.875927	1.73799	3.38761	1.42496	4.23232	1.00112	2.77582	3.09012	1.71424	1.65483	2.05517	2.6002	1.73503	1.67277	0.944506	4.79882	0.626304	3.71212	0.931114	3.3372	1.48846	3.98427	0.584727	4.16669	1.10744	2.67937	0.562213	4.04495	2.37146	0.753074	1.16539
ADIPOQ	7.22466	6.99445	6.31549	6.85041	8.56723	5.00682	6.10318	6.07876	5.78562	5.65094	5.6326	5.47722	6.82492	4.62218	5.19161	5.21112	5.49705	5.84414	4.92539	6.20761	5.9095	4.8569	4.61517	4.54984	6.29893	5.69146	5.98886	5.9274	5.05935	10.2178	5.47261	6.12546	10.8157	5.97772	3.24046	7.66522	5.37525	7.17746	6.37289	6.43997	9.81114	8.5318	9.52397	7.35852	4.02945	6.71302	8.60293	5.30754	5.08364
ADIPOR1	7.50165	7.53471	7.5182	7.35641	7.65887	7.69109	7.5598	7.2789	7.89388	7.7405	8.2334	8.38389	8.30699	7.76066	8.20246	7.37604	8.0008	7.85581	8.30887	7.19572	7.77332	7.45359	7.78592	7.59268	7.7489	8.2752	8.03591	7.64562	7.58791	8.16553	7.79841	7.94349	7.37355	8.23141	7.50875	8.69621	7.7641	8.19234	7.77003	8.34866	7.7681	8.53437	7.62992	8.47327	7.82396	8.15507	7.79841	8.43932	8.26949
ADIPOR2	8.00245	8.54648	8.25106	7.90612	8.5075	8.29939	8.30699	8.10803	8.48226	8.32022	8.31085	7.70248	8.20928	8.56966	8.30038	8.23709	8.46601	8.00487	8.09542	7.96243	8.21475	8.01418	8.08918	8.02217	7.536	8.23513	8.13976	8.24558	8.37715	8.02653	8.43932	8.11213	8.61587	8.31935	8.37613	8.15685	8.62234	8.24462	8.56154	8.20928	8.34866	8.11368	8.64241	8.09226	8.64761	8.03226	7.81969	7.93213	8.0485
ADK	7.93915	7.49827	8.13888	7.65328	7.19133	7.71464	7.67302	7.42799	7.33371	7.46972	7.75855	8.15237	7.42458	8.04931	7.63434	7.77806	8.11213	7.59767	7.60395	7.63999	7.93213	7.44475	7.05998	8.05824	8.48109	7.71402	8.06003	7.74823	7.72958	7.83701	7.66713	7.53162	7.2523	7.30898	7.61116	7.06234	7.46196	7.12318	7.57125	7.03149	7.53047	7.46912	7.74963	7.46496	7.69491	7.34985	7.20875	7.73378	7.10705
ADM	8.04787	8.24462	7.56041	8.08068	7.46379	8.45577	8.11287	8.42201	7.13246	7.31679	7.44827	7.40695	6.9622	8.46131	8.67622	6.83167	7.14654	8.18958	8.25501	7.96711	6.78843	7.30734	7.76942	6.04985	7.11034	6.93819	7.74396	7.66713	7.42856	9.22381	6.82322	8.26868	7.84602	8.11368	8.44049	8.23615	7.81548	8.01255	8.10383	7.54217	8.48641	7.87233	8.08236	8.63152	8.9065	8.96203	8.18482	8.51335	7.95863
ADM2	5.38207	4.77868	3.86421	5.10153	5.08276	5.29011	1.19636	1.20953	5.18845	4.21259	4.24788	4.01641	4.28374	2.47157	5.58636	5.85539	4.93109	3.04422	4.55107	5.21977	4.64865	2.16213	1.75786	3.425	4.82489	3.26733	5.59547	4.4004	4.65315	4.37318	4.65775	4.30259	5.80846	2.88657	5.09217	4.88726	1.6078	1.43121	4.2456	2.62754	4.18524	5.92363	4.34209	4.31476	5.77192	1.57402	3.94271	3.62473	3.24223
ADNP	7.32322	7.50993	6.94344	7.33434	7.27571	7.52498	7.34164	7.36781	7.00512	7.19185	6.85326	6.94709	6.82363	7.27778	6.99626	7.1266	7.07962	6.88411	6.93636	7.18212	6.84185	7.32106	6.96672	7.05998	6.93018	6.66981	7.1755	7.21844	6.80899	7.02389	7.20675	7.12993	7.54385	7.55408	7.10845	7.28518	7.13246	7.24585	7.02108	7.35911	7.24482	7.52126	7.34985	7.29434	7.01863	6.96404	7.75024	7.26639	7.17007
ADNP2	6.11448	6.25752	5.9182	6.11162	6.29587	6.34954	6.40357	6.25064	5.9568	6.41026	6.41274	6.08691	6.59022	5.84161	5.82122	5.97234	6.01644	5.59695	5.60008	5.93887	6.0894	5.92776	5.97125	6.38942	6.19418	6.13111	6.37807	6.43652	5.44225	6.12435	5.58015	6.05385	6.68445	6.47128	6.43896	6.47081	6.06009	6.42636	6.60976	6.36332	6.45827	6.38907	6.29626	6.08389	6.38173	6.29055	5.95018	6.80604	6.05778
ADO	8.10298	7.79228	7.84871	8.05197	8.0485	7.878	7.63617	7.66326	7.68283	7.69491	7.46853	8.41879	7.6092	7.58174	7.7874	8.04291	7.63877	7.84471	7.90612	7.68012	7.56273	7.75855	7.65384	7.45187	7.59767	7.49538	7.9913	7.6124	7.66454	7.9112	7.9905	7.95706	7.92569	8.06993	8.21545	7.89082	8.43261	8.08747	7.8952	7.6092	8.13796	8.35273	7.93837	7.82039	8.08328	7.90048	7.33214	7.84602	8.03993
ADORA1	5.35127	4.86708	5.73203	5.65197	4.59584	5.39463	4.9404	5.45985	4.87074	4.79204	4.97855	4.97822	3.95184	4.08671	4.23059	4.414	4.40302	4.49315	5.46386	4.89598	5.2768	4.76137	5.73962	4.69714	4.01026	4.79204	5.48948	4.56554	4.38192	5.75673	4.05036	5.27281	4.63553	4.85936	4.00977	4.67044	5.23815	5.51447	4.8188	4.76264	4.54284	4.85936	4.64316	5.59312	4.78868	4.95095	4.46485	4.89954	4.27917
ADORA2B	1.34975	4.11467	1.40471	3.24539	2.13899	2.92628	2.50859	1.36175	5.04092	1.95199	2.95747	3.72874	2.94363	0.708856	-0.740993	3.65222	3.8261	3.85887	2.98715	4.54284	5.08871	1.53228	3.25322	4.90673	2.09689	5.22055	2.74741	4.36764	3.85531	3.26733	4.63297	3.00506	3.69256	3.66728	3.4633	3.9916	3.56205	3.39227	4.23232	4.48374	2.79598	1.93845	2.86321	3.05026	4.45503	4.65775	2.51403	2.99117	2.57859
ADPGK	5.72257	5.4678	5.80011	5.55368	5.74939	5.24141	5.30839	4.92501	5.39613	5.57043	5.32777	6.05665	5.34418	5.51049	5.87033	5.54726	5.45513	4.86989	4.82606	5.78277	6.12435	5.88291	5.76081	5.44582	6.03664	5.33278	5.13491	5.38315	5.49156	5.15336	5.49312	5.14963	5.57261	5.89194	5.62576	5.17927	5.75939	5.65061	6.05352	5.53302	5.61968	5.56253	5.61688	5.11367	5.75797	5.326	5.75752	5.7211	6.6317
ADPRH	5.23706	4.91332	4.95987	5.45407	5.38942	4.8921	5.30877	5.45407	5.18405	6.1505	5.32994	5.10875	5.29536	5.2434	4.7247	4.91137	5.3024	5.00236	5.0413	4.63889	4.14802	5.09779	5.62609	5.05223	4.32416	4.85737	4.76752	5.2567	6.03349	5.02188	5.15599	5.36021	4.24239	5.03107	5.14258	4.60113	4.65816	5.24819	5.25432	4.97425	5.08634	5.64781	5.22409	5.42733	4.8374	5.35005	4.56554	4.64703	5.08634
ADPRHL1	8.39423	8.26682	8.86935	8.56853	8.40976	8.45231	8.17146	8.11709	8.68669	8.41879	8.14057	9.16266	8.41169	8.45139	8.67079	8.46704	8.45577	8.56356	8.76437	7.8398	7.83554	8.25894	8.27614	8.67757	8.92883	8.82622	9.0316	8.29939	9.14907	7.77266	8.82784	8.03759	8.27048	9.2633	8.96696	9.0746	8.68023	9.44304	8.74596	9.36808	8.71475	9.12538	8.88459	9.10369	8.44049	9.38977	8.7629	8.81755	7.62101
ADPRHL2	6.9078	7.65949	7.79094	7.15369	6.98706	7.13049	7.08738	7.12805	8.01898	6.88369	7.01205	7.10418	7.6027	7.5218	6.59301	7.34327	6.88542	7.32649	6.53812	7.61175	7.33546	7.04623	6.49741	7.36842	8.02749	7.6092	7.25774	7.10755	7.70188	6.92471	7.78521	6.92294	7.06406	7.39591	7.68204	6.80252	7.18528	7.07828	7.32906	7.17996	7.08983	7.26795	6.72575	6.75671	7.14708	6.97094	7.3226	6.93414	7.13454
ADRA1A	6.03316	5.91891	5.95124	6.27203	5.47939	5.48091	5.87445	5.93887	5.91241	5.34821	5.82226	6.44957	6.34414	5.40087	4.58948	5.41107	5.73312	5.69781	5.21793	6.00884	6.11673	6.26051	6.19562	6.27844	5.87101	5.28815	6.34809	5.38723	5.14219	4.58699	5.85264	5.69273	4.88175	5.03643	5.04054	4.53075	6.03848	5.48581	5.61075	5.07649	5.04289	4.55549	5.64566	5.33863	5.22825	5.02535	4.62259	5.37493	5.26
ADRA1B	0.750443	0.874403	0.795586	3.2466	2.90387	3.2668	2.22136	0.782556	4.63973	1.58377	1.55417	2.07203	2.92326	2.73287	3.64765	4.27586	0.699652	3.24892	1.65548	1.79835	1.42496	1.17116	6.72964	0.650102	3.69957	4.14973	1.45496	2.24198	2.28072	0.918489	4.549	2.79453	1.55918	2.316	1.65166	5.71272	0.609394	1.23705	1.21526	1.90875	5.14919	3.06612	1.12896	0.833224	2.98982	1.25507	2.72495	2.4988	1.71902
ADRA1D	4.46032	1.48415	1.57197	1.56972	1.51803	1.51586	1.51699	5.01276	2.03962	1.86696	1.08871	1.00442	1.64377	4.06162	1.32628	2.04688	1.06043	2.84735	3.62644	1.81964	2.16585	2.41867	1.38801	1.08309	1.86479	1.7392	2.98354	4.0034	0.966911	3.72668	1.40403	3.35405	1.71782	0.209555	2.38361	3.11693	3.00161	0.834029	0.133986	2.98914	1.70071	1.96764	1.93604	2.84193	0.172487	0.946592	1.12302	1.20159	1.6187
ADRA2A	0.896426	2.91897	2.47419	3.69501	0.884807	0.90998	4.30619	4.05179	3.7523	4.0411	3.22295	2.85506	2.27289	3.49611	0.147238	2.79845	3.20387	1.81064	0.275872	5.13532	5.00609	3.79222	4.50154	4.4004	4.31773	5.1687	1.25388	3.94179	3.5068	4.16344	4.1985	2.70959	3.82756	3.49225	1.97894	3.29175	1.18706	3.47327	3.88329	4.23518	1.12012	0.571939	0.70687	2.4755	3.105	3.9814	2.21386	1.39422	3.00992
ADRA2B	2.90089	3.95037	1.16428	4.51295	4.18388	4.03555	5.40374	1.14262	3.52112	3.14815	3.55273	1.67584	0.785817	5.1141	1.85827	2.67647	5.73927	1.11062	1.82849	1.86408	1.46476	2.37887	4.55151	1.54184	0.495332	1.36025	3.92262	0.293945	2.30247	1.24946	1.53126	3.58279	1.78977	5.42881	0.786788	4.02046	0.270554	5.44045	1.87673	1.26576	4.50787	3.06736	3.28565	1.46753	1.13426	1.38511	2.54293	0.935171	1.37015
ADRA2C	4.59791	4.72294	6.51364	5.69781	5.44661	5.56027	5.19161	5.87143	6.09841	5.91089	5.0421	5.29195	5.05265	5.27852	6.41845	5.37493	5.13226	5.58818	6.26604	5.22092	5.80979	5.27852	6.36332	4.99403	6.13223	6.01833	5.37229	6.31509	6.33247	4.91387	5.7519	5.41882	4.38686	5.93626	5.76081	6.12766	4.8845	5.84052	5.46854	5.65411	5.32529	5.78935	4.8569	6.09435	4.95583	6.07876	6.6281	4.63475	5.45647
ADRB1	8.64761	7.99921	7.25662	8.52009	8.00158	8.00323	8.41344	8.03837	8.91286	7.97485	8.15068	8.08328	7.43805	7.61867	7.93765	8.1264	8.13976	8.55021	8.29384	8.44718	8.35912	8.94832	8.72951	7.90387	7.61116	8.14557	7.88846	8.62234	8.11368	8.24462	7.47474	8.3309	6.82731	7.23642	7.30085	7.00128	7.42458	7.68074	7.89082	7.82761	6.72832	6.97563	6.93991	6.8811	6.81675	7.26639	7.43392	7.07685	6.15834
ADRB2	6.89341	6.78878	6.54912	6.8431	6.89376	6.52622	6.87479	6.58411	6.01242	6.52123	5.89565	6.60209	6.28293	6.49167	6.4563	6.15672	6.53689	7.16306	7.06362	6.00922	6.64804	7.20875	6.88458	6.72203	6.03458	6.19737	6.12011	6.69299	6.89466	6.73886	6.54419	6.27988	5.92085	6.16467	6.17753	5.96732	6.39807	6.93018	6.62848	6.60934	6.55186	6.12766	6.71564	6.53854	6.92973	6.49049	7.21478	6.44491	5.93196
ADRB3	1.25617	1.22869	1.31075	1.31075	1.26634	1.26215	1.26852	4.6798	-0.15642	0.862779	2.65036	2.63574	1.17843	1.6367	3.27806	1.10045	1.22975	1.49157	1.53944	1.82669	0.794788	1.31669	1.39817	2.25519	0.642752	0.29987	3.0106	1.16192	1.74266	1.45288	1.41417	3.29562	3.82804	1.74558	2.08596	1.02313	0.906214	0.673909	1.01128	2.21628	0.854376	0.16796	-0.0730405	1.13484	1.51158	0.737292	0.867405	0.231999	1.81964
ADRM1	6.62306	6.53728	8.2228	6.21831	6.5307	6.65946	6.09919	6.71741	8.11859	7.62608	6.83498	7.08299	6.41026	7.11133	7.49663	7.46853	7.27938	7.28046	7.57536	6.15524	6.11557	6.91812	7.01584	7.08258	7.10755	7.73021	6.99356	6.76861	7.07412	6.75467	7.06186	6.73006	6.61152	7.11034	6.60666	6.911	7.02952	6.77469	6.67992	6.6739	6.99037	6.09186	6.73179	7.10984	7.04087	7.25116	7.24585	6.5538	6.43774
ADSL	8.31935	8.53933	8.96531	8.50874	8.43487	8.42745	8.31194	8.18688	8.37225	8.20928	8.43932	8.66844	8.2771	8.80063	8.35465	8.9354	8.32137	8.49552	8.07398	8.81755	8.25003	8.56599	8.04291	8.34088	8.51335	8.54145	8.38008	8.25106	8.78385	8.54518	8.49552	8.50874	8.6414	8.58724	8.68669	8.1697	8.61587	8.52915	8.50531	8.37328	8.52565	8.08236	8.49787	8.38191	8.55379	8.31676	8.08328	8.75913	8.16186
ADSS	4.92382	5.0143	4.24919	4.16053	4.9404	4.65029	4.9854	4.58193	4.52283	5.53344	4.83941	4.75618	4.53557	5.2359	5.3234	5.00195	4.86019	4.51375	4.1808	4.80609	4.94546	4.72214	4.8048	4.37842	4.92147	5.10801	4.14488	5.05449	4.85175	4.4233	4.71716	4.55718	4.65854	3.97949	4.71873	5.17968	4.44971	5.32181	4.35359	5.02229	4.99719	4.67208	4.69062	4.95501	4.78271	4.64051	4.96291	5.04762	5.34971
ADSSL1	8.81918	8.86667	9.25478	8.60573	9.04534	8.75787	9.33412	8.86233	8.98334	8.88818	8.93204	7.77003	8.53808	8.59193	8.79275	7.74603	8.24735	9.09421	9.25039	8.32321	8.98489	8.41778	8.39105	8.47986	8.36325	9.09995	8.9935	8.47116	8.61708	8.89899	8.36007	9.10725	8.24637	8.87837	8.19059	8.28619	8.74724	8.88947	8.74047	8.77555	8.41778	8.81614	8.88818	9.14184	8.65439	9.13513	8.53933	8.46372	8.09694
AEBP1	4.29648	5.49899	4.79292	4.22382	5.84941	4.37082	2.45581	4.82737	3.59942	4.18166	6.34572	3.54849	4.66829	4.40617	4.58062	3.19531	5.07797	3.4183	3.92171	5.26463	4.98199	4.3161	5.08835	4.26662	5.41848	4.86503	3.724	5.10984	4.254	5.81682	5.11888	4.05364	8.89899	6.82568	4.24064	6.82996	4.2886	4.85478	3.20614	5.27019	5.4898	6.43527	4.44664	7.71225	6.34691	6.11857	7.70652	6.05665	5.48654
AEBP2	7.23738	7.01584	7.06736	7.05285	7.04183	7.10129	7.17058	7.08789	6.88711	7.03482	7.10129	6.65737	6.85421	7.27938	7.50043	6.28529	6.99177	6.9527	6.73676	6.87218	7.34164	7.30509	7.20927	6.93544	6.44179	6.71653	7.07216	7.54496	7.23533	6.85849	7.26236	6.71526	7.03948	6.88411	7.30618	6.54992	6.94663	6.77739	6.97186	6.74847	7.0582	6.77739	7.1401	7.1661	6.86831	6.7514	7.56753	6.61187	6.41353
AEN	4.80729	4.61779	4.45594	3.65068	5.24221	4.57199	3.8169	4.73267	4.42913	4.73891	4.27494	4.73365	4.68895	5.40883	5.02903	4.13103	3.70582	4.99323	4.13002	5.30071	3.39517	4.92736	5.5382	3.54218	4.42462	5.19266	3.77814	5.38574	5.07843	3.79323	5.66581	4.70722	4.94207	5.22549	5.33648	4.26316	4.71025	5.1047	3.4287	3.55944	4.19894	4.52325	4.35763	2.61612	4.00252	4.53512	4.55107	4.68055	4.23418
AES	7.44366	7.67496	7.72185	7.92182	7.75646	7.50875	7.4942	7.91049	7.71673	7.9069	6.98425	7.44882	6.79725	7.03625	7.24427	7.21024	7.85508	8.08406	8.09154	6.5307	7.02249	7.59189	7.86433	7.88639	7.77869	7.90477	7.93292	7.80261	8.04146	8.43487	7.84335	7.97798	7.1223	7.94553	7.21164	7.99755	7.84471	8.2559	7.6318	8.30516	7.08547	7.64297	7.64428	8.35465	8.10049	8.66949	8.11368	7.43234	7.18426
AFAP1	3.00724	4.73267	4.12724	2.57286	4.18121	5.08399	4.10861	4.92418	3.78531	3.70265	4.56947	3.82318	4.75784	3.90845	1.68697	4.16969	3.74273	2.97015	4.27231	4.46666	4.65358	3.82899	4.6385	4.57585	4.89954	4.61392	3.56948	4.49817	4.29824	4.42913	4.11182	3.44903	4.15611	4.36575	4.11224	4.5053	3.96135	3.80085	3.89376	4.02472	4.1201	3.91232	3.58477	3.78483	4.01068	3.6588	4.34125	3.86181	4.45686
AFAP1-AS1	3.16987	1.39315	1.47623	2.92399	2.8516	1.42185	1.85679	1.43653	0.937162	0.991573	0.924691	1.2068	0.112687	0.797891	2.40601	0.842638	1.87598	1.72452	1.97387	1.86916	0.0193837	0.188105	2.47872	1.80328	1.87296	1.87154	1.22975	1.32526	1.38569	1.52632	1.19698	1.13128	1.69719	1.62271	1.01272	2.17371	1.41265	2.64747	-0.43349	1.72388	1.7409	2.9486	1.72865	1.05169	0.739018	1.12468	1.53394	1.57347	1.49211
AFAP1L1	6.36144	6.65528	6.81589	6.49741	6.5562	7.16508	6.90819	6.80389	6.73306	6.85139	6.68792	6.53193	6.55272	6.47563	6.14351	6.61152	6.63925	6.71023	6.42022	6.59301	6.4575	6.2709	6.2631	6.76436	6.71653	6.83083	6.85139	6.52777	6.20249	6.81589	6.33138	7.04381	6.85041	7.17848	7.28835	6.91725	6.85944	6.79027	6.84617	6.68871	6.86389	6.78673	6.96672	6.68162	6.02122	6.38633	7.27346	6.56422	5.85909
AFAP1L2	3.77257	3.16804	3.95433	3.92116	4.54733	4.17527	3.60548	4.58372	4.08587	4.01735	3.50348	4.31818	4.36806	4.77823	4.5886	4.32927	4.18478	4.46209	4.32649	3.73139	1.62442	3.96274	3.12191	3.89331	3.82756	4.02807	4.21489	3.75899	4.83543	4.23193	4.8048	4.15831	3.58908	3.0522	4.20618	3.9333	4.56432	4.58597	4.64787	4.06734	4.27091	4.51336	3.36717	4.5437	4.38241	3.95939	5.27932	4.02602	4.65816
AFF1	7.10984	7.18375	6.8253	6.90223	7.26845	7.27938	7.23371	7.00512	7.02432	6.56262	6.80859	6.76733	7.50695	6.81408	6.89648	6.99265	7.17007	6.85192	6.64771	6.82687	6.81943	6.74069	6.66744	6.64804	6.11376	6.19381	7.09506	6.65657	6.58499	6.90436	6.59524	6.77152	7.52558	7.03482	7.29639	6.9527	7.38921	7.07781	7.52742	7.15124	7.21122	7.23273	7.43013	7.34655	7.21688	7.23642	7.42959	7.108	6.73427
AFF2	4.05545	3.61138	3.74839	4.27494	2.67842	0.692442	3.39105	2.44172	3.2319	2.94789	3.53117	3.44784	3.3958	3.46498	3.43822	2.78802	4.03792	2.49434	3.40014	4.16393	3.18354	1.39935	3.24595	4.55319	3.9361	4.19499	3.06486	3.07902	3.39456	3.56205	3.20083	3.13112	2.97895	4.12142	3.83253	2.92989	2.97742	4.11416	2.16585	3.41782	2.90089	3.61525	2.54096	1.84199	3.10847	3.72619	3.85033	3.35118	2.97608
AFF3	1.5923	2.49333	3.4287	1.64623	3.64264	3.69397	4.49229	2.91897	0.953347	1.5923	2.60297	2.14765	1.1383	2.4755	0.80694	1.40705	1.24553	1.86626	1.8246	1.99215	1.75661	1.3089	0.51292	1.97049	1.53394	1.58779	2.16213	1.09433	1.34815	4.0946	1.28333	2.66191	3.55327	1.49908	2.72939	1.55532	3.36318	2.16213	1.81643	1.37205	3.18295	2.58156	4.06822	3.32518	4.25586	3.02874	1.36339	1.70662	1.70071
AFF4	5.74519	5.88951	5.45477	5.80944	5.96115	5.58667	5.86222	5.81857	5.93485	6.05743	5.18193	5.17025	5.24221	5.66297	6.25752	5.54535	5.50726	5.4045	5.19123	5.71235	6.09289	5.28357	5.74102	5.60263	5.50911	5.37267	5.63161	5.99414	6.14318	5.3814	6.06084	5.52327	5.94287	5.86813	5.43719	5.62782	5.5367	5.36383	5.83255	5.49824	5.60973	5.90127	5.67272	5.47029	5.80707	5.26383	6.2131	5.54766	5.21387
AFG3L1P	1.49317	4.58193	3.6119	3.28285	2.41412	4.59501	4.18625	4.78656	1.90566	3.90192	2.99619	3.00992	3.19475	3.76592	3.61623	2.60871	2.11106	3.21353	2.39192	3.76998	2.5853	1.78026	1.61473	3.18541	1.56709	1.88518	1.8812	3.61358	3.51687	3.12074	4.00614	3.66156	3.65023	3.11336	1.63147	3.5866	2.71591	2.5538	3.25261	4.14757	3.81166	4.07329	2.21263	2.27952	3.48611	2.86712	4.53512	1.92514	3.02137
AFG3L2	9.6797	9.56688	9.35201	9.7419	9.73004	9.25684	9.48961	9.43111	9.35201	9.44098	9.12192	9.43593	9.14016	8.75787	8.88297	9.31361	9.47489	9.49996	9.13843	9.30924	9.3185	9.45019	8.9585	9.21413	8.86667	9.00736	9.75826	9.29682	9.00368	9.15897	9.2716	9.29011	9.30924	9.23911	9.81976	8.9354	9.58202	9.34339	9.77317	9.21178	9.35201	8.82784	9.66038	9.18015	9.23667	9.15495	8.95333	9.15314	8.51661
AFM	3.60704	0.714912	3.95139	0.823351	0.770177	3.46075	1.15126	2.86391	1.41417	1.57618	2.0635	2.74839	3.40699	1.53446	4.24919	2.77753	3.33513	-0.459521	0.3892	1.46527	-0.0333132	4.21398	-0.665719	2.87994	2.87692	3.13112	1.66978	1.57985	1.84588	3.724	1.65548	1.62498	3.00865	3.59619	2.20447	0.902358	3.90332	1.66197	3.03378	1.68924	2.45932	2.3308	3.78069	3.55442	3.17929	2.82062	1.54975	1.72388	2.54096
AFMID	0.724086	4.45062	1.52241	3.96559	3.35461	4.21489	3.29368	3.72718	2.45266	2.67547	2.47971	2.12893	2.82137	1.74686	1.37015	1.71367	4.59318	1.05288	1.31732	1.71014	4.4093	1.57197	3.6103	1.37864	5.10947	2.81004	2.82137	3.07068	1.49646	3.72049	0.715925	3.09864	1.86998	4.5433	1.83539	4.34749	1.66735	2.73211	1.09574	4.61429	0.834851	4.79041	1.37815	1.88924	2.79047	1.73037	2.03101	2.59227	2.68495
AFP	4.65315	0.475948	3.41669	3.50034	3.83882	4.029	2.7693	3.01127	1.51643	2.06881	3.36777	2.49987	3.2428	4.27137	1.12775	3.77257	4.89018	4.0002	2.95089	3.96559	3.50857	3.43502	0.897815	2.47291	2.10663	3.18163	2.21263	2.18288	2.66641	3.01422	2.46408	2.1144	0.755766	0.970742	0.962128	1.35029	2.29634	1.37917	4.17527	0.118359	2.10663	3.1157	4.21169	1.07202	2.24675	0.397895	1.48627	3.77257	2.55493
AFTPH	6.70841	6.64289	6.75871	6.91765	6.88188	7.00615	7.00561	6.90737	6.85369	6.43052	6.54419	6.41982	6.3404	6.87622	6.86071	6.82116	6.51246	6.85588	6.48142	6.72358	6.83537	6.86917	6.51564	6.71065	6.41168	6.38094	6.47563	6.79767	6.36372	6.3561	6.71741	6.4794	6.59335	6.38292	6.94709	6.0891	6.81546	6.32595	6.6926	6.64734	6.99669	6.42292	6.86957	6.70143	6.89956	6.3686	6.93901	6.60576	7.12454
AGA	6.04102	5.89957	6.04761	6.10458	5.99921	5.54941	6.19045	6.3875	5.69781	5.94398	5.66965	5.52144	6.20833	5.75567	5.33754	5.59277	6.49602	6.2496	6.25853	5.70262	6.24715	5.67579	5.56893	6.45211	6.61559	5.65696	5.81127	5.68679	6.04425	5.73462	5.99034	5.73246	5.88291	6.08137	5.56216	5.56818	6.32209	6.06849	5.91711	5.66229	5.39536	5.41507	5.82661	5.53234	5.62742	5.66581	5.42307	5.83181	5.82026
AGAP1	5.77609	5.37191	5.71583	5.70473	5.80813	5.92705	5.97161	6.18551	5.59908	5.35309	5.35603	5.09041	5.05181	5.41178	4.98456	5.80813	5.55964	5.90808	5.4678	4.92623	5.19986	5.62644	5.42413	5.59095	5.87549	5.21269	5.57883	5.66752	5.19788	6.10382	5.3756	5.51049	5.54198	4.87901	5.39013	5.16486	5.69632	5.42593	5.39463	5.09069	5.24599	4.8513	5.40992	5.66471	5.72007	5.47302	6.0406	5.11659	5.17274
AGAP2	0.15298	0.131626	0.15764	0.169861	0.158918	0.160169	0.150803	0.153998	5.60865	5.70945	5.60696	5.72404	5.36234	4.73267	4.69671	4.47839	4.40437	4.30303	5.21677	3.33948	4.10817	3.3996	3.20317	4.02184	4.99196	-0.234319	0.0193837	-0.302448	0.60063	-0.144427	0.216476	0.190201	3.13812	2.14647	5.09544	4.51802	3.68649	4.26707	4.50318	3.87841	4.37624	4.15786	3.90422	4.24022	2.85381	4.43665	5.60487	5.63902	5.35783
AGAP3	6.52239	6.13223	5.87289	5.98241	6.18551	5.85575	6.27277	6.20172	6.22026	5.75673	5.80325	5.60159	4.70599	5.21156	5.14219	5.71898	4.30799	6.03458	5.10358	6.08731	5.6993	6.46394	5.41033	6.23185	6.08648	5.43029	4.85175	6.75425	5.85814	6.40594	6.22636	6.32631	4.80569	5.72367	5.91646	5.76605	5.45299	5.53598	5.75567	6.20249	5.07063	5.73203	5.30209	1.80266	6.02224	6.60889	6.29161	4.414	5.56535
AGBL1	2.9524	2.61054	3.01797	0.551327	3.3506	0.615581	2.73474	2.75546	0.726979	0.9193	2.96088	1.84729	1.74145	0.243309	4.91095	3.52683	2.80604	1.9024	2.43931	0.348936	2.15112	0.257081	2.85381	1.94674	4.49985	1.67703	2.75163	2.64838	2.73121	2.87605	3.08808	3.16746	0.685952	1.01668	3.15449	1.51217	2.30723	3.12074	0.242291	2.5894	1.31838	4.35229	2.93936	1.02048	0.82737	1.52076	1.06043	2.27837	1.29894
AGBL2	2.95003	3.41504	2.53344	2.08826	3.04823	0.339294	2.78478	2.88435	1.80664	1.57728	3.10057	3.05026	2.6647	2.6868	0.758354	1.21431	3.80316	3.18354	4.0776	1.448	0.355729	3.47588	2.26332	3.8023	0.959612	2.17276	1.33486	1.35692	1.63259	4.11182	1.51158	1.3715	3.50916	1.54063	1.26397	3.3257	3.77981	2.81254	3.60502	3.68649	3.46554	1.47742	1.23875	3.94222	1.00856	3.3905	2.39982	3.38706	2.91347
AGBL3	2.64331	3.89184	1.96141	2.93517	2.58263	2.10211	2.95686	2.56972	1.48846	2.04493	3.32113	3.65174	3.44784	1.80985	3.3854	0.714912	3.07974	3.68449	3.72718	3.07772	1.58377	3.51687	4.10301	3.20446	1.72618	2.53248	3.20205	3.34432	3.47219	3.10431	3.13746	3.19418	1.1087	2.56272	2.73545	1.75605	1.25286	2.37257	1.04649	2.98715	2.50755	3.75274	3.1438	2.43319	1.50926	2.73474	1.29278	2.52072	3.46673
AGBL4	4.21439	3.6157	1.77719	3.44433	2.68409	3.02726	3.32729	2.52928	3.87554	4.43447	3.8261	3.30464	3.31109	2.66846	2.52183	3.65633	4.2216	2.83553	2.52816	2.87247	3.43172	2.85941	3.69449	3.53432	4.65816	3.14259	3.58599	3.7381	3.43559	4.28685	3.24892	3.86181	1.89766	4.31909	2.97236	4.21398	2.98151	3.03267	2.55283	3.48672	2.92837	3.95846	1.84388	3.55944	2.85804	3.85377	2.6655	3.94803	2.91684
AGBL5	4.79762	4.91011	5.34708	4.8082	4.94587	5.09305	4.52947	4.98902	5.11802	4.4674	5.29498	5.33278	5.24784	5.01392	4.44754	4.97307	5.53234	4.67557	3.57832	4.71757	4.10492	4.24919	4.60936	5.64047	4.92623	5.49571	5.03149	3.88329	5.5126	5.00924	4.73011	5.4826	5.12501	5.30911	5.01714	5.58181	5.40954	5.35675	5.07887	5.08157	5.69209	5.2119	5.12924	5.27642	5.24784	5.96774	5.12537	5.11535	5.25324
AGER	1.4686	1.43221	1.51586	1.51907	1.46694	1.46422	3.49173	1.47798	3.57165	2.31471	1.11257	0.818883	1.99984	0.684739	3.80528	3.15984	1.78657	1.13484	1.75179	2.09468	1.42824	1.5918	1.22758	0.680399	3.3695	1.45648	1.43774	1.8554	2.58156	1.01668	1.15252	0.759336	2.04688	1.57027	4.29346	1.88271	3.68552	0.411293	2.69824	1.52681	1.1501	0.171132	2.87692	1.31944	3.7551	1.93254	3.98228	1.45393	1.41688
AGFG1	7.16961	6.73504	7.04721	6.80687	6.70312	6.86521	6.80162	6.70646	6.84185	6.66789	6.98563	6.63493	7.24752	7.07685	7.09783	6.84401	6.93729	6.74188	6.99487	7.15267	6.98425	7.15413	7.29534	6.87442	6.86701	6.5582	7.04291	7.00032	6.96764	6.63374	7.19667	6.66489	6.51047	6.72401	6.56097	6.61402	6.83268	6.52239	6.72358	6.3542	6.5985	6.47444	6.62546	6.60713	6.62228	6.66571	6.57066	6.7791	7.30567
AGFG2	4.18966	3.96087	1.15833	3.36371	3.3262	3.74893	3.96417	3.57057	3.04823	4.18346	3.33454	3.9286	3.92457	2.96649	3.45402	1.5132	3.85227	3.72101	2.93662	3.14875	2.92326	3.65222	3.33948	4.11923	3.93558	3.78837	4.01641	3.28115	2.00676	3.25509	4.17152	3.78022	0.988784	4.5828	3.04224	3.36318	3.04897	4.22977	2.20793	3.84274	3.97174	4.1877	1.88197	3.7837	3.57324	3.92903	3.41004	3.75648	3.29063
AGGF1	6.73306	6.79464	6.39014	6.77152	6.65126	6.64008	6.69814	6.54834	6.14003	6.46506	6.00404	6.68871	5.93705	6.39884	5.66896	6.2047	6.50578	6.57561	6.35954	6.20211	6.61274	6.60934	6.42976	6.53728	6.25028	6.28787	6.4189	6.43963	6.55978	6.36332	6.39477	6.43083	6.50652	6.49692	6.72525	6.6281	6.58943	6.45168	6.38134	6.38367	6.73223	6.24032	6.79767	6.64051	6.35651	6.44957	6.3267	6.43724	6.58499
AGK	7.06919	7.09036	7.14969	6.41722	6.73427	7.18667	7.05329	6.86335	7.0023	7.35151	7.21798	7.60395	6.89911	7.35586	6.69046	7.34482	7.25288	7.50108	7.34706	6.16537	6.87218	6.72525	6.78633	7.27137	7.54552	7.37178	7.77131	6.59097	6.89171	7.24019	6.61644	7.16109	6.79767	7.12709	7.3226	7.01908	7.27233	7.05142	6.82322	7.01672	6.91541	7.00973	7.39775	7.08053	7.2042	7.04128	6.43997	7.18528	6.27919
AGL	9.89524	9.65526	9.10542	9.36808	9.18216	9.17028	9.47994	9.30924	9.34543	9.40381	9.15495	9.42637	8.89576	8.95664	9.06727	8.92722	9.00368	9.18421	9.04878	9.14538	9.12917	9.2308	9.22654	9.10369	8.21997	9.07967	9.64741	9.15897	9.19646	9.38221	9.27869	9.63141	9.07098	9.51625	9.22654	9.32775	9.39886	9.40834	9.43111	9.36148	9.29682	9.34085	9.44098	9.6205	9.11835	9.45277	8.71864	9.72034	8.50649
AGMAT	3.69756	3.80316	3.9992	4.3152	3.62243	3.30575	3.88329	4.13051	4.21802	3.85426	2.57569	2.34791	3.29002	2.40113	3.84326	3.60054	3.47813	3.79741	3.33392	2.72591	3.43055	1.48527	3.00578	3.1756	4.83042	2.94427	3.31991	3.83303	2.60771	3.42161	3.40831	3.20083	2.79453	3.0396	3.16417	2.99691	3.38306	3.95375	3.8681	3.99683	1.49533	3.50857	3.70215	4.3527	4.0057	3.5822	3.82366	3.32462	3.57003
AGPAT2	5.92495	6.59453	5.65943	6.20508	6.34196	6.59524	6.27385	6.67312	6.78257	6.38633	6.4282	6.54992	6.63084	6.57516	6.61842	6.09082	6.31781	6.81546	6.77429	6.50255	6.18151	6.57236	6.65483	6.71653	6.14979	7.27186	6.7791	6.60754	6.52271	7.52742	6.70719	6.65698	6.38633	7.10325	6.77152	6.97478	6.02845	6.87356	5.96003	6.40816	6.35574	7.53106	6.15834	6.5562	6.3233	6.86158	6.11594	6.34809	5.97234
AGPAT3	6.94805	6.72525	7.13049	7.20174	7.02202	7.01772	6.9119	7.17105	6.86521	6.6739	6.7309	6.56466	6.78508	6.67803	6.53984	6.59726	6.51436	7.13348	6.35303	7.10226	6.426	7.21743	6.70763	6.70021	6.51924	6.8913	6.36449	6.9386	7.16251	6.63764	6.93677	6.16054	6.22523	6.33392	6.65862	6.36254	6.94895	7.02757	7.16715	6.29664	6.76483	6.39734	6.87622	6.70273	6.93819	6.82911	5.8021	6.57236	6.7669
AGPAT4	1.20953	1.18355	1.26455	2.36785	3.00224	3.0396	3.16353	3.421	0.418885	-0.25868	2.5904	1.61048	1.81131	1.7759	2.45064	1.68457	1.88856	1.88518	3.28628	3.35973	2.94564	1.57834	4.24197	-0.0032134	3.82899	1.26215	1.53672	3.19653	2.39298	1.9152	3.31164	1.83676	1.43831	3.29749	2.6746	0.738075	2.70407	0.905489	2.64048	0.0967541	0.641642	3.21223	1.80664	1.69262	1.29495	0.862779	3.07202	1.30489	3.0846
AGPAT4-IT1	4.10399	3.86421	4.80328	3.4183	4.01352	4.3841	4.3122	3.99012	3.61084	3.51734	3.87693	4.15923	3.83158	5.04725	3.68845	3.7752	4.21439	4.68477	4.45991	4.83941	4.18579	3.64814	4.45375	4.76797	1.6875	3.421	3.33948	3.95523	4.26316	4.03843	4.52453	3.7523	3.63414	4.3152	4.60574	5.24819	4.64051	4.33891	4.12859	4.38854	4.46032	4.30668	3.81304	3.06168	4.0508	1.99308	4.10447	4.67336	4.18524
AGPAT5	5.10119	5.18985	5.09969	6.24822	5.07183	5.81476	5.83754	6.00018	5.67653	5.32421	5.68861	5.83006	5.28206	6.19198	6.33622	5.50308	6.13472	5.14419	5.70441	6.24337	6.4465	5.47547	6.33775	5.80879	5.08871	5.49194	5.45647	6.64528	5.8199	5.05409	5.89326	5.31446	5.73462	5.74481	5.5845	5.66264	5.44008	5.39536	5.82371	5.41467	5.69814	6.08876	5.4678	4.89245	5.37596	5.19123	5.21677	6.12916	6.56508
AGPS	6.40473	6.40854	6.03884	5.99144	6.46622	6.17247	6.4794	6.47246	5.72552	6.09841	5.95349	6.22636	6.10203	6.21955	6.26824	6.37057	6.29275	5.79115	5.87679	6.13034	6.57441	6.30823	6.21714	6.36669	6.04804	6.05743	6.34534	5.82511	6.34844	5.76246	6.31896	6.25104	6.12655	6.21677	5.92219	6.76347	6.16054	6.33213	6.19668	5.96546	6.35382	6.36484	6.30903	6.38942	6.34377	6.44848	6.39253	6.22895	6.30903
AGR2	1.16655	1.1383	1.22471	1.22023	1.17234	1.18124	1.18528	1.19814	0.566938	0.179767	0.138533	0.230684	1.02889	0.0823892	0.928802	1.41417	2.48558	1.34173	2.92326	1.46094	0.951383	1.19814	2.3489	1.31567	0.815276	1.20953	0.880387	1.46809	1.34921	0.872681	0.641642	0.43407	0.560562	1.70377	0.355729	0.712131	1.50504	1.19099	0.18611	1.54407	0.436181	1.33142	0.0573333	0.361515	0.644034	0.818033	0.842638	0.221417	0.759336
AGR3	0.740533	0.882553	0.78333	0.773064	0.712131	2.99339	0.738075	2.72319	1.15778	0.966225	1.49692	1.36175	1.5536	1.43653	1.72321	0.604866	2.84502	1.37815	3.94553	0.175492	0.64881	0.555849	3.53605	-0.028278	0.619647	1.83539	1.10744	1.08189	1.20554	1.42128	1.17526	1.04132	0.667344	3.3996	1.19157	-0.665719	1.68924	3.55511	3.27394	0.277803	1.18706	3.03267	2.54989	2.58263	0.602085	2.97538	0.191211	1.1693	1.31838
AGRN	5.24375	3.3985	4.70765	5.0694	4.88686	4.31773	4.99636	2.65219	4.32194	4.09599	4.96329	4.64447	4.64147	4.00977	5.84266	4.47954	4.28815	4.1985	4.90271	3.76892	4.68565	4.06734	5.14337	4.51969	4.99757	5.28159	4.66268	4.3274	4.08862	3.76844	4.26494	4.47556	4.49477	4.96666	4.34389	4.68975	4.51584	3.94657	4.2474	4.89058	4.76264	3.9992	3.71901	4.5171	5.67877	4.448	5.2426	4.92926	4.77475
AGRP	4.70309	3.95706	4.7111	2.87775	3.53371	2.88288	4.69276	4.40352	3.63169	4.42731	3.56054	3.74988	3.70733	2.52183	2.23666	2.10424	5.28278	3.31222	3.31278	1.8678	2.53115	4.52859	1.09488	4.03697	4.89879	4.8637	4.31476	2.95321	4.06303	4.5277	3.73546	3.79222	3.55675	3.98815	1.91871	5.80912	3.61775	2.27837	2.04155	1.80008	5.44545	1.53611	5.65515	2.83729	4.92108	1.88924	3.14189	3.77311	2.42291
AGT	8.82057	8.14292	8.71353	8.70389	8.7629	8.27229	8.26868	9.0349	9.22848	8.8292	9.29682	8.94518	8.1879	8.49195	8.52207	9.12538	9.14725	8.70918	9.01105	9.00537	8.97217	8.44177	8.88297	8.79423	9.02466	8.65561	8.41985	8.29477	9.42408	8.96531	8.99702	8.53933	8.15855	8.26107	8.8292	8.27975	8.4035	8.59193	8.11931	8.72143	8.70253	8.97042	8.13299	8.86072	9.01298	9.27869	8.82183	8.35465	9.12917
AGTPBP1	8.19144	7.77465	7.64297	8.19752	7.57297	7.62418	7.80864	7.37896	7.46788	7.5598	7.92569	7.32697	7.28092	7.10613	7.25875	7.28258	7.7006	7.79584	7.8053	7.30786	7.20124	7.87432	7.83843	7.58419	7.56997	6.98849	7.71352	7.50568	7.4782	7.82827	7.86502	7.404	6.97881	6.60666	7.34814	7.04087	7.8079	7.42458	7.39525	6.75058	7.24427	6.96493	8.13538	7.33717	7.19324	7.44253	6.69179	6.88458	7.95249
AGTR1	5.14815	5.82122	6.05818	6.03522	5.61325	6.05165	6.02265	5.41178	4.91053	4.80166	5.56389	6.35136	5.0188	5.54941	5.06384	5.84659	6.32979	5.0298	5.22369	4.80241	4.60153	4.87329	5.272	4.03317	3.88565	4.64013	5.22131	5.04953	4.66015	6.74307	5.53017	5.61616	6.73632	5.96512	5.48329	5.51863	6.0818	5.90199	5.75336	5.19986	5.43858	5.01677	6.4206	6.38094	5.56063	5.80642	5.57482	5.6299	5.48016
AGTR2	3.53706	2.49987	2.97308	2.75227	3.15508	2.5064	1.84014	4.27545	3.12857	2.64545	2.16444	3.47757	3.02211	1.7096	3.18602	4.06303	4.52283	3.73303	3.42272	2.87321	1.18	1.5503	4.43183	2.35695	2.90387	3.55012	3.50743	3.59383	2.86636	2.94292	2.82647	3.28723	3.59216	4.04542	2.95812	3.16228	4.8753	4.16393	2.15112	3.3004	3.29002	3.15744	4.46666	2.59725	3.23866	3.43172	3.06798	3.33219	3.69554
AGTRAP	5.21793	5.63193	5.42811	4.68142	5.06662	5.60159	5.11328	5.26197	5.09152	4.79632	5.62742	5.38029	6.03743	5.31372	5.4844	5.40049	5.74347	4.89439	5.44767	5.71583	5.94766	4.13808	5.61432	5.04169	6.04208	6.13184	5.24637	4.76797	4.89018	5.35347	4.52547	5.19625	5.16712	5.60228	5.66369	6.09082	4.9505	5.37957	5.0413	5.79908	5.26799	4.91714	5.18525	4.87164	5.02153	5.08871	5.14919	5.78452	6.28251
AGXT	1.90409	1.28333	3.41233	1.36025	1.31944	1.3128	1.31397	2.05404	3.0576	1.45919	1.27529	3.15744	1.72388	2.17635	2.69616	0.238735	0.0103481	1.55975	2.50203	3.00578	2.6923	1.48034	1.93328	1.79716	1.52579	0.800243	2.72229	2.52183	2.00505	3.29368	2.57859	3.08747	1.08756	0.383943	1.0148	2.5894	2.07727	0.765543	0.734406	3.66099	2.43681	1.18644	1.37691	1.24832	0.531382	2.249	1.14022	1.28047	1.63259
AGXT2	2.64232	1.10287	0.821576	2.9373	0.752194	2.23787	1.08933	0.799499	0.268003	1.48088	0.98804	1.47742	1.58889	1.77082	4.22293	0.793052	1.61519	1.16769	1.87811	1.80266	4.70111	2.77187	3.04696	2.23422	0.477688	2.84193	1.51748	1.47284	1.73218	3.03073	1.51586	1.539	1.32315	1.05971	5.09896	2.3308	1.435	0.868853	1.26102	1.57347	1.45852	1.67877	3.0167	0.172487	1.13255	1.02762	0.51292	3.00096	1.9884
AHCY	7.17058	7.44772	7.62801	7.04958	6.72525	6.96261	6.62104	7.00699	7.86502	7.25616	7.77743	7.31729	6.63041	7.59523	7.91344	7.07734	7.10984	7.4776	7.0792	7.18528	6.81633	7.37072	7.4263	6.79119	7.27519	7.77743	7.11581	7.08205	7.76531	7.67178	7.74396	7.62481	6.85761	7.74119	7.43121	7.96797	7.69815	7.74603	6.51081	7.25616	7.12894	7.6814	7.12942	7.65757	7.46664	7.79584	6.95032	7.02862	7.74534
AHCYL1	7.18426	7.44707	7.32205	7.50765	7.59115	7.46016	7.38136	7.54552	7.43178	7.37555	7.55356	7.43337	7.70966	7.55807	7.66205	7.40812	6.99669	7.35043	7.24075	7.39831	7.44366	7.58419	7.46196	7.57922	7.68507	7.35911	7.25503	7.77678	7.23738	7.42349	7.63049	7.36026	7.47141	7.45299	7.59051	7.0787	7.13853	7.21688	7.26444	7.10418	7.44772	7.21844	7.08936	7.29374	7.56273	7.42572	7.20973	7.44707	7.36549
AHCYL2	5.72293	6.3618	4.99914	5.47654	5.73165	5.99744	6.37614	5.55149	5.37304	6.17862	6.07612	6.58336	5.73137	5.62926	5.91783	5.69309	5.74842	5.63799	5.92919	4.89483	5.23228	5.5356	4.90624	5.31562	5.39175	5.38352	5.2171	5.07843	6.12125	5.46585	6.1549	5.56324	6.16467	5.52475	5.74164	5.82122	5.44809	4.99876	5.30677	5.17812	5.44118	5.93344	6.09082	6.04692	5.6605	6.31283	5.4299	5.84123	5.73203
AHDC1	4.37128	4.01502	4.15741	2.94922	2.51082	3.57687	4.14351	4.0445	4.02853	3.84326	3.28448	3.24346	3.78266	4.31094	3.48054	3.90332	2.65732	4.55989	4.83002	4.036	3.63077	4.29048	3.26972	3.6683	3.79787	4.38024	4.24605	4.15247	4.42082	4.11271	4.54733	4.18346	3.29919	3.54382	0.584727	4.36949	3.50246	3.86368	3.28285	4.11841	2.63309	3.71103	3.22053	3.62365	2.48457	3.34243	3.03441	4.33064	3.05688
AHI1	4.9505	5.08601	4.68477	4.98199	4.72799	4.55947	4.54984	4.38766	5.00682	4.95216	4.24418	4.02602	4.53254	4.74916	5.09857	4.57199	4.66268	4.64447	4.76504	4.55718	4.84555	4.79083	4.1653	4.49817	5.15371	4.40659	4.77391	5.2916	5.24896	4.40802	4.96705	4.78824	5.07323	4.5815	3.94507	4.39996	4.98826	4.7943	4.87117	3.9766	4.92886	3.99683	5.13914	4.22931	4.1233	4.3722	5.54085	4.96622	4.49229
AHNAK	6.3343	6.9494	5.53598	6.92252	6.55733	6.85421	7.05952	7.00615	6.03209	6.55898	6.33099	6.70185	6.36372	5.96584	6.02911	6.081	6.6317	6.14091	6.64453	6.02265	6.55304	5.78277	6.49776	6.35954	6.49206	6.36029	6.53854	6.3694	6.99177	6.03664	6.47481	6.09876	7.31679	6.74188	6.52905	6.57696	7.17649	6.88369	6.96404	6.53028	6.74929	6.85468	6.44455	6.84267	6.8708	6.70347	7.10653	6.09363	7.24075
AHNAK2	1.45745	2.41659	3.38825	1.50633	1.68641	3.81961	1.45496	3.32237	1.29894	3.93895	4.17769	4.76221	2.21763	1.65421	2.59624	3.87599	1.35754	1.73443	0.991573	3.34671	2.37014	1.00309	0.128048	5.20715	3.93895	5.35127	2.1932	3.19954	1.59893	1.47451	0.597694	1.3597	3.93986	3.48105	3.41782	2.80343	2.81417	1.61247	2.5718	2.07203	2.33829	3.43606	-0.111247	1.76268	4.1808	3.8227	1.54122	1.48034	4.50829
AHR	6.90051	6.66789	6.87218	6.8775	7.08053	6.47168	6.82864	6.39014	7.38863	6.36631	7.23074	7.04908	7.39942	6.65196	7.44882	6.66616	7.16203	7.08789	7.06487	7.18768	7.73311	7.32854	7.36957	7.1992	7.17105	6.47904	7.21429	6.96948	6.6449	6.19487	7.4776	6.57766	6.82606	6.92338	6.3875	6.61062	6.6239	6.17284	6.6739	7.27835	6.86917	6.27203	6.65083	6.4078	6.24646	6.82646	6.30272	7.08154	7.3406
AHRR	2.6655	3.01422	3.9674	3.88282	1.32891	3.19475	3.49119	3.2895	3.9056	4.48634	3.27022	3.62644	3.8774	3.82951	4.26224	5.03767	4.33064	3.2416	3.72619	3.43281	1.5132	3.70119	2.06031	3.83547	4.56863	4.07375	3.27517	3.83927	3.46225	3.69352	3.41233	4.07715	3.15685	3.46673	3.81735	1.01272	4.18038	4.63726	4.45015	5.53924	3.38146	3.71473	4.04695	2.99814	5.10431	4.56432	2.97236	4.15611	3.96417
AHSA1	7.71096	8.14131	7.88781	8.34866	8.36932	8.49195	8.27229	8.76992	8.12109	8.4786	7.7971	8.01813	7.76531	8.30786	8.21284	7.88781	7.76942	8.35465	8.33503	8.64915	8.59535	8.61975	8.40769	8.0667	7.61175	8.37715	8.30516	8.56482	8.01739	8.83792	8.07823	8.99523	8.48751	8.12383	8.75529	8.24067	8.40976	8.26003	9.05789	8.52321	8.74319	8.32626	8.58724	8.19059	8.79275	7.95706	8.5041	8.28821	7.85933
AHSA2	4.95914	6.33658	5.80325	5.52144	5.39325	5.22549	5.08478	5.43141	4.92736	5.2843	5.12461	4.92963	4.91869	4.96077	4.92108	5.33574	5.50946	4.95987	5.78452	4.78868	4.83328	5.12768	5.68061	4.95421	4.43489	4.49101	5.51896	5.47615	5.28701	5.2171	5.2426	5.32298	6.13544	5.75533	5.85575	4.91332	5.7976	5.80426	5.68389	5.60599	5.67379	5.60451	6.02911	5.93235	5.14464	5.10875	6.93414	5.30537	5.38281
AHSG	3.29865	3.17301	2.75871	3.49972	0.459827	3.19653	3.36717	0.487369	2.54989	4.58236	3.34893	4.3599	3.27875	3.96322	1.41316	2.87852	4.0186	3.57625	3.50034	3.75744	3.4535	4.16344	2.73545	3.73441	3.21857	4.09098	3.88189	3.95184	3.35118	4.80935	3.93245	3.71845	1.30208	3.53319	3.27455	3.81591	3.25912	3.92405	1.5953	2.8459	3.76247	4.21259	3.87465	2.90387	3.91232	0.710951	2.80343	3.04622	3.52369
AHSP	4.33848	2.59143	4.62343	4.8114	4.71917	3.14449	3.9471	3.88282	4.40211	3.91823	4.42647	4.51178	5.17883	4.04593	4.42696	3.71325	2.54293	4.97786	4.08813	4.25269	3.94271	3.82011	4.03931	4.8637	5.13452	4.33585	4.44577	4.33721	3.93655	4.02697	4.23232	4.35229	4.03218	4.07058	4.85478	4.58412	4.17956	4.47678	3.74534	3.65633	2.64438	4.32157	4.55504	4.24977	5.09741	5.13873	4.45325	4.05315	4.89672
AICDA	0.97154	1.6858	2.78549	1.0148	2.59624	0.983295	0.972145	1.43831	2.95747	1.0906	0.195315	1.82921	1.88924	1.92277	2.20793	1.23593	0.902358	2.99814	1.77082	0.449292	0.853598	-0.503837	1.44381	1.74622	1.68641	1.38328	1.31231	1.08871	1.51217	1.24553	1.11558	1.08309	-0.272647	2.46732	0.542657	1.76634	0.368559	1.50563	2.70874	1.5334	2.98083	1.57728	1.87071	1.18875	3.8593	2.07203	0.695523	1.01921	1.96764
AIDA	8.27229	8.41246	8.53808	8.46131	8.62905	8.3791	8.33309	8.194	8.28998	8.12383	8.34279	8.65819	8.76857	7.9448	8.06003	8.35465	8.28523	8.23513	8.31762	8.63152	8.70127	7.97252	8.4786	8.29576	8.3984	8.28902	8.50649	8.41684	8.43722	8.60158	8.54774	8.47769	8.52565	8.28146	8.45577	8.33703	8.52207	8.48226	8.76032	8.66231	8.35077	8.48109	8.32137	8.41169	8.62377	8.4721	8.23709	8.59193	8.71733
AIF1	5.3343	4.64865	4.39435	4.38369	5.2156	5.43858	4.26494	4.8853	5.42593	4.67602	5.03311	5.10235	5.70152	4.95795	3.09986	6.01792	5.88987	5.188	5.49705	6.25786	5.87033	5.59167	5.32925	5.57043	6.57516	5.29536	4.82445	4.92147	5.67992	4.5437	5.14847	4.77868	5.64367	4.34167	4.85606	4.79083	5.50308	3.65481	6.07028	5.90127	5.30169	3.81821	4.76339	3.69957	4.8188	3.72005	4.46258	4.59584	8.04454
AIF1L	5.68644	6.42105	6.543	6.42976	6.41168	5.85943	6.41809	6.03664	6.42746	6.82363	6.31781	6.93195	5.57043	6.43015	6.07646	6.63493	6.74307	7.16251	6.55026	6.09435	4.74261	6.31136	5.93059	6.22283	5.95819	6.38452	7.01811	6.07802	7.12075	6.35533	6.94166	6.27419	6.79682	6.78673	6.64845	6.41546	6.65573	6.74712	6.36372	6.64289	6.82953	6.54182	6.49532	6.4233	6.7497	6.87218	6.29501	6.35062	6.76436
AIFM1	7.52126	8.27229	7.20875	8.20246	8.32524	8.90976	8.9898	9.27411	8.24462	8.59077	8.36932	8.39947	7.41738	8.27794	8.23513	8.46601	8.79573	8.03506	8.22196	8.08747	8.5075	8.51335	8.76564	8.17851	8.42201	8.32524	8.37815	8.72951	8.37613	8.63522	8.67757	8.75787	7.42288	8.14643	9.038	7.95552	8.88818	8.12296	8.89091	8.00158	8.13044	8.06253	8.18688	8.17948	8.70389	8.6437	8.19234	8.2771	7.28882
AIFM2	5.23191	6.07837	5.67342	5.66716	5.70366	6.46108	6.40555	6.28101	5.6875	6.26537	5.9285	6.2619	5.84906	6.21754	6.3343	6.19198	6.11483	6.22101	5.97055	5.79728	5.78799	6.46664	6.63208	5.27972	5.30136	5.81366	5.88143	5.90505	5.80533	5.67238	6.70086	5.9531	6.10382	6.10818	6.01606	6.13768	5.68679	5.79048	5.77053	5.58334	5.81195	6.09507	5.3701	5.21156	5.6239	5.83468	5.69964	6.00957	5.54318
AIFM3	4.4404	3.59477	3.19653	5.13452	3.25392	3.91974	2.5894	4.07623	3.92312	4.06111	3.91369	4.00162	4.22619	3.30747	3.65989	4.12053	3.29493	4.93039	3.19226	4.72628	4.40715	4.62817	3.75463	4.25269	5.26655	3.72049	3.57324	3.96987	2.74058	5.45334	2.81004	3.92116	4.5908	5.3141	4.4112	3.74583	2.42509	4.9363	2.38822	1.78461	3.78837	5.02791	4.49013	2.41867	2.45675	5.87713	4.05227	3.94608	4.12282
AIG1	7.87432	7.33316	7.47533	7.76666	7.55858	7.53982	7.78521	7.62045	7.9741	7.79299	7.44882	7.67895	7.42288	7.82958	7.4782	7.55095	7.40934	7.94775	7.41164	7.65557	7.40695	7.58111	7.51628	7.84732	7.34541	7.6311	7.88353	7.68204	7.65187	7.88781	7.68642	7.91049	7.14911	7.43234	7.89755	7.61927	8.14474	8.21997	7.92634	7.48528	7.46788	7.41225	8.14891	8.01175	7.548	7.54552	7.11632	7.47201	6.97691
AIM1	4.2568	5.31446	4.83905	4.21533	4.57585	5.20782	4.81839	5.1477	4.46123	4.19144	5.19304	4.41892	5.64402	5.05693	1.84268	5.63583	4.65231	5.3234	4.82163	5.06056	5.31087	5.05066	5.00805	4.97107	4.80774	4.31684	3.92457	3.95037	4.37927	3.94124	4.33353	4.12423	5.51193	4.29346	4.48295	4.59117	5.02364	4.3126	6.32369	5.89637	5.0413	3.52633	5.04457	4.41546	4.79917	3.8384	4.26494	4.55989	7.13049
AIM1L	4.30259	4.26135	4.61267	4.25915	4.38151	4.29517	3.65429	0.850697	4.24418	3.81445	3.14508	3.74377	4.03978	1.89515	5.83006	3.12744	4.33761	2.88209	4.44536	3.09604	3.58808	4.42034	4.27412	3.79586	4.46394	4.15556	3.60502	3.64969	4.27962	3.66044	4.03646	3.20959	3.55623	3.22113	3.15332	3.41553	2.5303	4.68815	3.72985	3.62813	4.01951	3.14566	4.69532	4.55899	3.40496	5.23627	5.33896	3.67337	3.43172
AIM2	3.58279	2.74058	3.11262	4.83085	3.75129	3.02	3.84985	2.84193	2.64135	3.31636	3.70166	3.94608	4.05787	-0.209615	1.91606	3.90192	4.10586	3.61978	4.98103	2.26575	3.94179	1.41316	3.3262	4.75618	5.29723	1.2355	1.27421	1.67395	1.32989	1.13891	1.435	2.3344	3.01484	4.18434	3.31164	4.60898	0.589046	5.12694	4.60898	5.60801	2.92038	4.33157	4.32071	1.67453	1.36455	1.82175	1.55696	2.98083	5.33031
AIMP1	7.16508	7.42288	7.39369	7.19727	6.85546	7.13902	7.07593	7.04958	6.80041	7.21429	7.08834	7.14911	7.4942	7.23432	7.12454	6.79682	7.26639	7.13194	6.90395	7.15413	7.23273	6.96585	7.01393	7.01484	6.96355	7.16057	7.12276	7.35586	7.20521	7.01584	7.34271	6.92381	6.90522	7.24752	6.96355	7.49538	7.22675	7.2729	6.98286	7.18711	7.24644	7.33214	7.23323	7.1987	7.07456	7.01962	6.79641	7.05667	7.10613
AIMP2	7.89669	7.80328	8.72538	8.15855	7.63049	8.40769	8.05675	8.13538	8.25501	8.21922	8.30229	7.86082	7.14212	8.1758	7.91575	8.34088	8.04931	8.48641	8.17059	7.92496	8.14292	8.22469	8.35273	7.56633	8.06164	8.30321	8.1096	8.05197	8.50318	7.83261	8.31848	7.70002	7.86942	7.80465	8.37225	7.77997	8.43151	8.22372	8.31296	7.80661	7.66851	7.39471	7.88055	7.39591	8.4035	8.05592	8.1767	7.97564	7.48876
AIP	6.54025	6.43652	6.44917	6.55777	6.49893	6.8811	6.6341	6.6739	6.63925	6.74847	6.58862	7.05236	7.01863	6.76599	6.37892	7.06966	7.11974	6.96404	6.53307	7.05667	6.61108	7.01164	6.27919	7.03149	6.33549	7.10613	7.02012	6.608	6.14046	7.08154	6.4764	6.85088	6.93369	6.86957	6.4028	6.4442	6.84448	7.23589	6.99626	6.95498	6.53388	6.62459	6.59219	7.06362	6.83934	6.9622	6.70684	6.70884	6.2072
AIPL1	4.25586	3.80271	4.10861	3.65633	1.63901	2.72939	4.51891	2.63206	4.23977	4.03263	3.69602	3.84474	3.69449	2.98354	2.54293	4.66102	1.22869	4.03365	1.95111	4.19944	4.52989	4.029	4.20483	3.90896	3.70423	4.06693	6.51364	3.46942	3.6366	3.85277	3.57229	3.45963	3.94412	4.4093	4.86064	3.93655	3.67903	4.036	3.91823	3.83976	2.96156	4.36806	2.6706	3.75089	3.28507	4.2944	4.43665	3.41055	3.30464
AIRE	4.04299	3.64969	1.59001	3.425	3.49863	0.642752	4.31052	0.65948	4.35723	4.29915	3.25003	2.14889	3.99398	1.52462	4.43135	3.44658	5.59477	1.80664	4.05405	1.87811	5.0856	4.95216	5.72481	2.03402	2.68586	3.91672	4.81997	4.06303	4.99719	3.53006	4.393	3.86136	2.96568	1.78331	2.02564	2.78549	1.85472	5.60263	3.69908	1.28506	2.42721	4.44664	2.36559	1.70187	3.88723	3.76096	3.01924	2.80604	1.55918
AJAP1	2.29634	1.45288	1.53561	1.53672	1.48627	1.48415	1.48689	1.49692	1.21111	0.948777	0.734406	0.156516	0.0755663	1.57084	0.975696	1.46527	1.62736	0.274929	1.12839	1.16655	1.5334	1.70487	0.670605	1.75486	0.935785	1.05288	2.49223	0.98731	0.795586	0.877346	0.823351	1.06043	1.23448	1.19474	1.53175	1.16428	1.26576	0.510701	1.27868	0.297237	1.16012	1.11491	1.07316	1.2984	1.42946	1.21751	0.611921	0.377282	1.03947
AJUBA	7.05367	6.88062	5.20487	6.59058	6.289	6.23107	6.5009	6.34377	5.78105	6.12616	5.43537	6.34228	5.65271	7.11229	7.10984	6.26824	6.03664	6.02224	5.60263	6.08691	6.27203	6.3248	7.12894	6.14541	5.64886	5.54941	6.05095	6.39209	6.57353	6.51607	6.55061	6.72749	5.41399	5.83255	5.80879	6.02736	5.54162	6.17208	6.01833	6.2664	6.15524	6.34881	5.46307	6.08498	5.69146	5.97269	6.56178	6.24855	5.07107
AK1	7.99845	8.89742	8.76437	8.03315	8.41985	8.28146	8.05512	9.2308	8.38296	8.7515	9.02637	8.44807	8.24267	8.48109	8.73629	8.1697	8.56248	9.08117	9.11102	8.50318	8.13538	8.58482	8.60829	8.58609	8.44718	9.12192	8.67488	8.3309	8.42634	9.10369	8.62905	8.96696	7.97252	8.39947	8.29193	8.44932	8.7811	8.47011	7.95089	8.09621	8.6414	8.70918	8.51891	9.10725	8.93204	9.16489	8.38981	8.66593	7.3819
AK2	6.89213	6.44848	6.59375	6.90522	6.35136	7.00512	7.16715	7.05416	6.85992	7.25932	6.77349	7.16508	6.64771	7.40523	7.3422	7.32322	7.05329	7.23964	7.05003	7.24427	7.28932	7.36781	7.17455	7.25503	7.40346	7.15602	6.92122	7.10463	7.52008	7.03002	7.38809	6.82157	6.61719	6.48537	7.13499	6.89648	7.09174	6.5964	6.76599	6.54992	6.82363	6.45593	6.74435	6.61601	6.9494	6.81589	7.64063	6.46267	7.04291
AK3	10.2432	10.0069	9.80821	10.2302	10.1118	9.90885	10.0839	10.0002	9.52135	9.79868	9.87688	9.81359	9.95503	9.60009	9.33224	9.72723	9.9787	9.81679	9.63919	10.073	9.98269	10.2764	10.271	9.88552	9.62611	9.90458	9.57704	9.86013	9.98953	9.84467	10.0802	9.96164	9.9787	9.69369	10.2385	9.9157	10.2346	10.0031	10.0002	9.75826	9.88552	9.96164	10.0337	9.97203	9.98953	9.86975	9.28568	9.85077	10.0919
AK5	2.39501	3.55327	1.63097	0.602085	0.536713	2.6736	3.83927	4.13242	1.87071	3.50034	3.72985	2.94004	2.72027	1.85401	1.2466	2.15112	3.14627	4.46076	4.84641	2.60488	2.93936	0.843453	1.56505	1.64377	3.72353	3.48611	2.77355	2.76226	3.7752	3.30464	2.30969	1.94939	3.9147	3.78974	2.94645	4.03405	4.76413	3.45577	0.222441	1.3592	2.86801	3.96652	3.78317	3.89282	2.86956	3.48105	3.31343	2.1355	2.97538
AK7	1.33142	3.00029	1.38967	3.74426	1.33649	1.33384	1.33261	4.07715	1.49111	1.6023	1.53126	3.00926	1.58261	1.13595	-0.0333132	2.8986	0.875927	2.79292	2.86712	1.6	-0.162529	3.12253	1.5586	1.88767	2.63023	2.06238	1.653	1.28451	1.48627	1.994	1.35869	1.38032	0.724989	1.38269	2.89176	2.91421	1.54063	2.78165	1.43334	1.38801	1.64377	1.62328	2.56272	3.0947	1.29781	1.13891	0.692442	1.44692	1.08933
AK8	5.16178	4.94081	4.55151	5.25324	4.22699	4.11416	4.62299	4.40393	5.03601	4.87033	4.65189	3.87113	4.28547	5.29308	4.83576	4.34749	3.58764	4.81183	3.69059	5.03852	3.82563	4.0635	5.05371	5.46197	4.29555	4.74916	5.98815	4.35763	5.13414	5.0549	4.66829	4.67557	5.34673	4.02338	5.12217	4.77391	4.6217	4.12629	4.38024	5.41848	4.99072	5.23076	5.00403	4.3807	4.9492	5.20294	4.60532	4.42462	4.49058
AKAP1	8.11782	8.35371	8.31935	8.3931	8.08068	8.58609	8.45349	8.18482	8.55494	8.04535	9.0299	8.50103	8.34384	7.53406	7.37713	8.17146	8.3448	8.69877	8.11636	7.84335	7.65887	8.04931	7.90387	8.19144	7.70652	8.66949	8.33001	8.16553	7.55589	8.71353	7.80601	8.42201	8.20419	8.30404	8.54145	8.1322	8.63892	8.76437	8.65305	8.15949	8.23513	8.3448	8.63522	8.68258	8.37613	8.55494	8.10049	8.2559	7.30453
AKAP10	3.38425	4.53606	2.96878	3.78317	4.69575	4.3126	4.33937	3.5911	4.15611	3.95184	4.40527	4.57545	3.97402	3.79486	3.94859	4.11467	4.71318	4.37128	3.97804	4.34464	3.14687	4.19625	4.38766	4.36216	3.58955	4.26002	4.46349	4.1201	3.48486	3.74377	3.9499	4.15381	4.837	4.01119	4.11516	4.09647	4.86752	4.21976	4.63632	4.4714	4.99994	3.86463	4.60612	3.68155	5.03107	4.28455	3.52059	5.27523	5.12344
AKAP11	6.90689	6.99626	6.66274	6.81186	6.85139	6.48699	6.93544	7.03197	6.55978	6.79767	6.4241	6.43159	6.83845	6.9266	6.56386	6.53655	6.4473	6.476	6.48657	6.68357	6.71432	6.61559	6.78798	6.67435	6.12873	6.3694	6.89517	6.70974	6.12435	7.0079	6.41423	6.69299	7.10083	7.13348	7.09036	7.08094	6.86437	6.84704	6.74268	7.09692	7.00837	7.13348	7.25875	7.08547	6.92252	6.87708	6.4937	6.69814	6.97374
AKAP12	5.77351	5.78898	5.64747	6.12726	6.30308	5.35943	6.00018	5.51226	5.25466	5.61932	5.98962	5.30638	5.40625	6.18867	6.63286	5.37229	5.19087	5.2304	5.48878	6.3233	6.04208	5.8021	5.50578	5.72517	6.03316	6.09596	5.31056	6.80299	6.7791	5.63514	5.64886	5.09937	7.30843	6.08498	6.20279	5.64256	6.62306	5.76982	6.18551	5.99854	6.53617	5.86777	5.86741	5.66716	6.55937	5.80251	6.64008	5.45907	6.03492
AKAP13	7.07104	6.36484	6.49088	6.80991	6.81805	6.88369	6.81805	6.91993	6.68792	6.89043	6.63651	6.22994	6.75381	7.01205	7.02296	6.48969	6.47246	6.426	6.36449	6.66076	6.62717	6.80859	6.38134	6.93414	7.04958	6.99799	6.4818	7.65384	7.5145	6.29857	6.99984	7.0023	7.56633	7.05049	7.22725	6.79767	7.25341	7.05367	7.64489	7.03577	7.34428	6.78798	7.09692	6.56422	7.52498	6.96176	7.28773	7.26795	6.56988
AKAP14	0.645178	1.81518	2.65314	2.7572	2.04796	2.1789	2.22254	3.23988	0.941916	0.60775	1.0523	1.18764	2.4988	2.33568	2.47872	1.17792	1.46247	0.627559	0.563823	1.52462	1.95111	1.16539	2.86321	1.30103	3.27143	1.84068	1.30686	3.29628	1.42022	1.58474	2.92697	2.74058	0.146087	1.38328	3.28779	2.72229	1.16769	1.40937	2.07645	2.27063	2.76226	3.54583	0.590541	3.1763	1.74145	2.06238	0.255085	2.3395	1.9001
AKAP17A	6.10495	6.78798	5.78241	6.42895	6.03458	6.0135	6.23848	6.36407	6.04578	5.86335	5.91129	5.9128	5.6824	6.16689	6.07069	5.84266	6.02736	5.87474	5.55767	6.25853	5.50871	5.99603	5.58262	5.34275	5.4806	5.49866	5.33611	6.13925	6.16654	5.67379	6.4442	5.92996	6.30351	6.3652	5.94031	5.85229	5.65307	6.32866	5.68098	6.32703	5.71235	6.42261	6.12916	6.27165	5.47409	6.10527	6.25673	5.56461	5.52979
AKAP3	4.66829	4.09001	5.05265	7.08887	3.49561	2.86391	4.98706	4.85565	3.30747	3.96185	4.45816	1.62271	3.68449	2.80109	1.85204	1.11491	4.77651	0.967542	4.24883	1.31504	2.83245	2.19899	6.17247	1.20385	2.3622	3.48554	3.88468	3.89562	2.36328	7.07104	3.61416	3.81304	1.05169	5.65377	2.64838	1.74201	4.08499	7.02296	2.49763	4.57283	4.8513	5.26197	3.79323	4.05787	1.61473	3.78483	1.49481	2.39501	4.40527
AKAP4	1.93525	0.928802	1.02048	4.13808	3.72566	0.992873	0.981269	1.01547	0.287311	1.67877	-0.0209548	1.12251	1.44325	2.06031	1.71139	1.60543	1.37374	1.3	4.91793	1.15368	1.89285	1.1081	3.46498	0.283948	0.00382001	1.6402	3.31872	1.53126	1.4449	2.0676	2.03741	2.75964	0.885425	0.668311	0.771996	2.80202	0.141275	3.66784	-0.246945	1.33432	2.22957	1.37522	1.15474	1.04704	0.988784	3.85033	0.102457	2.26103	0.104279
AKAP5	1.26634	1.23875	1.31896	1.31944	1.2748	1.26963	1.27585	1.29005	1.4449	0.453508	1.3526	0.258062	1.19586	1.37979	1.05288	1.60474	0.172487	1.35754	0.566938	1.08933	0.929537	0.584727	1.99885	1.68008	1.91208	0.897815	0.922354	1.04458	0.51292	0.65948	0.730781	1.10626	0.775502	1.51699	0.883308	0.888397	1.25116	1.07029	1.46576	0.253392	0.952746	0.60063	0.714912	0.244917	1.09433	1.36175	0.104279	0.249287	1.43882
AKAP6	6.41061	6.16574	5.05735	5.86297	6.19987	6.14165	6.14653	6.0428	6.003	5.96953	5.46463	5.29461	5.75336	6.78418	7.02055	6.51047	6.32049	5.61968	5.59095	5.13105	5.94724	5.74939	6.35454	6.09507	5.45299	5.73794	6.69677	6.03209	6.5021	5.55996	6.36822	6.37892	5.57332	6.24892	6.25895	5.88143	5.73828	5.69377	6.29125	5.87923	6.20431	6.03383	6.27844	6.10527	6.33099	6.07364	6.03492	6.32442	5.01996
AKAP7	5.80846	5.15483	5.62151	6.0768	5.51585	5.4751	5.94253	6.00542	5.76317	5.84978	5.50759	6.21238	5.50946	4.85215	4.91466	5.85575	6.21238	5.60973	5.93196	4.77301	4.78144	5.12886	6.16396	5.61473	5.63902	6.04425	5.73462	4.83128	5.35049	5.40191	5.86408	5.72293	4.97901	5.3756	5.4325	5.25894	5.63161	5.7277	5.61968	5.17425	5.43141	5.74242	5.83255	5.89748	5.42521	5.51823	5.24784	5.13187	5.75404
AKAP8	6.3773	6.67992	6.23107	6.46069	6.79164	6.38212	6.08837	5.84625	7.00837	6.98757	5.94983	6.30933	6.4442	6.61313	6.69381	6.88992	6.92294	6.79947	6.50652	5.91428	5.68279	6.30047	5.95528	6.23911	6.68752	6.04245	5.88603	6.60622	6.78593	6.18305	6.73504	6.4442	6.19487	6.13331	6.27806	6.10495	6.1397	6.28718	6.01908	5.88886	5.87474	5.89848	6.14126	6.66789	6.24337	6.23401	6.75553	5.88143	5.82546
AKAP8L	4.24646	5.12033	4.013	4.02222	5.03562	4.97901	4.58412	4.70722	5.4939	4.962	4.25224	4.45459	5.08003	4.53033	4.37883	4.61309	4.5908	4.34973	4.15831	4.46166	4.49936	4.54124	4.1389	4.05643	3.68155	5.1614	5.06858	5.16672	4.29181	4.79996	4.78186	5.17106	4.9336	4.66102	4.48047	4.89713	4.84835	5.0602	4.63973	4.84269	4.94757	5.45647	4.82032	5.59408	4.5417	5.02751	5.22207	4.39863	3.93053
AKAP9	6.32125	6.68917	5.99603	6.19527	5.93196	5.88437	6.46995	5.97735	6.26679	6.24227	5.7601	6.34116	5.60801	5.50538	4.82032	6.57653	6.43774	6.59022	6.28371	6.17829	5.89127	6.19381	6.09289	6.13881	5.62675	5.50871	6.31937	6.2381	5.4207	6.0656	5.79494	6.59557	6.29542	5.97698	6.10993	5.83181	6.2131	6.14499	6.27495	6.14318	5.92882	6.02224	6.57315	6.29238	5.87248	6.25895	6.12125	6.38253	5.32816
AKIP1	7.16251	6.76004	6.65361	6.84013	7.01811	7.30734	7.1716	6.89213	6.67758	7.10129	7.00032	7.13902	6.90436	6.59097	6.43652	6.72316	7.15757	7.04434	7.15955	6.97325	7.24854	7.01962	7.17898	6.99089	7.0112	7.06319	7.14212	6.77562	6.86293	6.97736	6.68357	7.31575	6.8012	7.13745	7.1903	7.18319	7.0403	7.0112	7.20025	7.20071	6.79859	7.12942	6.6723	7.04573	7.16961	7.35254	6.32781	6.99311	7.08393
AKIRIN1	7.10274	7.20875	7.39998	7.22418	7.27778	6.98104	6.76773	7.09362	7.70454	7.28352	6.87306	6.96404	7.25932	7.74676	7.63754	7.10845	6.87884	7.10566	7.03769	7.04864	7.09981	7.3306	7.17255	7.37826	7.03525	7.10274	6.94487	7.59329	7.19469	7.0088	7.47084	7.28932	6.2549	6.65903	6.6857	7.24696	6.66938	6.96404	6.96084	7.08597	6.63286	7.14462	6.57066	7.07261	6.83124	7.31473	7.11527	6.57441	6.2627
AKIRIN2	7.04242	6.30115	6.48455	6.03169	6.57477	6.69422	6.67963	6.73541	6.44617	6.21754	6.89869	6.70841	6.87927	6.84653	6.80648	6.38094	6.49935	6.64845	7.06542	6.10416	6.57066	6.23142	6.81112	5.92531	6.02845	6.47799	6.28787	6.44179	5.9995	6.35954	6.66826	6.32519	6.57561	7.09127	6.41096	7.1992	6.37251	7.02518	6.63576	7.24379	6.46434	6.68317	6.45872	6.85944	6.56756	7.10566	6.08245	6.54834	6.39056
AKNA	1.47561	4.14169	1.52352	1.52579	3.59783	4.19673	1.94866	3.6646	3.24223	2.04381	1.52681	1.00856	3.24223	2.83172	1.66978	0.684739	0.238735	3.21605	3.9674	1.99885	0.257081	1.58662	3.68061	1.11724	3.88037	1.35308	0.829046	1.76455	1.03487	1.19157	1.10177	1.00378	2.55886	3.63373	1.13426	2.84735	1.34921	0.665227	3.72463	4.03263	1.27364	0.64039	2.46533	1.29946	2.41867	1.90636	2.81894	0.937905	2.10888
AKNAD1	0.642752	2.84656	2.96724	2.78633	1.89597	0.988784	2.77582	2.61612	1.435	1.87154	0.510701	1.11491	0.994889	1.16711	1.03947	3.06233	3.35118	3.46389	0.0979918	1.34441	2.72408	3.53801	2.00193	1.99022	0.697605	1.64561	2.48225	1.539	1.41969	3.33619	2.69824	1.78657	2.25015	3.35405	0.887682	0.918489	2.61711	1.50336	0.32281	1.85906	3.09539	1.92194	2.156	2.75087	1.55645	2.74232	3.1781	3.41344	1.87811
AKR1A1	7.44707	6.91541	7.40285	7.38309	7.03948	7.21478	6.9048	6.9494	6.93991	6.84953	7.27571	7.14502	7.69939	7.31473	7.26845	7.58856	7.58986	7.14317	7.48218	7.48357	7.34655	6.87574	7.11632	7.17058	7.82255	7.17746	6.81988	6.60845	7.09692	7.92108	7.00423	7.05236	7.15809	6.88711	6.62104	6.94487	6.80206	6.65006	7.07593	6.86521	6.68826	6.68485	7.19469	6.95412	6.72282	6.74268	6.73541	7.00282	7.74396
AKR1B1	9.26973	9.51355	10.0031	9.57418	9.41109	9.64741	9.68752	9.44543	9.39215	9.77317	10.5237	9.23911	9.49212	9.97203	10.1611	9.75567	10.222	9.62892	10.384	9.9787	10.0526	9.48731	9.99613	8.74047	9.60248	10.1653	9.9445	9.46967	9.67194	10.4193	9.62892	9.85077	9.23269	9.60248	10.0257	9.75015	9.69707	9.41109	9.20955	9.12032	9.27657	9.54362	9.15495	9.64983	9.68521	9.91939	8.82336	9.47994	9.35466
AKR1B10	3.54436	3.27688	4.07575	4.63889	2.13013	3.09927	4.65691	4.1772	3.33159	3.12744	3.25261	3.73497	2.90544	3.8097	2.03618	1.6023	0.741423	3.94904	1.89766	4.08627	3.98615	4.07623	3.80528	1.79589	1.13595	3.49173	3.3389	3.47697	3.38988	5.93271	3.15061	3.24103	4.95583	0.917137	4.27917	4.28907	4.66401	3.29805	4.27182	3.36899	2.65623	3.04556	4.1772	4.11271	3.5068	4.72509	1.59291	4.07943	1.96855
AKR1C1	7.06186	6.93819	7.63304	6.7047	7.61055	7.17305	7.30284	7.238	7.48823	6.4146	7.58174	7.25662	6.93369	7.29823	7.57359	7.15413	7.54443	7.88566	8.37328	7.19779	7.54443	7.04669	7.58236	6.98197	8.00412	6.9386	6.7514	7.68642	6.42105	7.77465	8.44401	7.16664	7.64063	6.38907	6.2138	6.45954	7.22768	6.28787	6.41546	6.6641	6.67629	6.5009	6.74579	6.08028	7.31784	6.57972	6.74393	6.75266	7.39303
AKR1C3	7.46912	7.47474	7.71728	7.08738	7.67895	7.59189	7.54616	7.05367	8.05017	6.44147	8.25306	8.07649	7.29374	7.83481	7.73512	7.90387	7.92767	8.11931	8.57707	8.16031	7.82396	7.56337	7.84602	7.54103	8.06418	7.59947	6.78926	7.72672	7.36604	7.52126	8.63414	7.63877	7.73311	6.72479	6.77993	6.97228	7.53282	6.86744	6.87708	7.05191	7.08299	6.42147	6.95459	6.3694	7.42124	6.66789	6.6922	7.30734	7.87593
AKR1C4	3.5822	0.293945	2.03517	0.43407	3.62966	2.95686	3.84885	2.27182	1.21431	1.78086	1.50691	1.69321	1.83253	1.20554	0.549595	1.29894	0.819887	0.182751	1.26634	3.26332	3.58908	0.984015	3.99455	3.8169	1.25875	1.32891	1.77784	3.45963	2.32568	3.30575	3.94032	3.20559	4.09319	0.558887	1.3964	1.3128	3.97126	0.810398	1.0269	0.982622	1.39935	3.54791	2.25873	4.11362	0.235589	2.28551	1.47022	2.62471	1.6875
AKR1D1	2.43194	2.70007	3.10364	2.40711	1.00041	2.32219	3.01736	2.42198	1.1365	2.156	2.25519	2.97173	3.05094	0.835628	3.80085	2.62852	3.40831	1.28895	3.47485	3.59942	0.996246	2.89794	1.27136	0.671627	3.37966	3.13812	1.81202	1.77218	2.2645	2.58713	1.84268	1.79898	1.20495	3.31817	3.66728	1.56089	0.635066	2.90472	2.94363	1.17292	2.56577	3.95139	3.0396	2.8516	0.894138	0.722062	1.75121	2.40949	1.58662
AKR1E2	1.76578	1.72021	1.80985	1.82523	1.7482	3.53432	3.46829	4.50154	1.63786	1.61187	2.89562	2.14988	1.12302	3.46777	4.12506	3.13239	1.1818	1.41473	3.47094	2.48342	0.904694	1.2466	3.45129	3.0106	3.31757	1.86853	3.36899	2.88363	2.23553	2.43552	2.43791	3.72619	2.25519	1.37917	2.049	-0.138372	3.40545	1.71729	1.75974	0.232685	3.13239	2.21143	1.36399	1.18813	1.71902	1.91043	1.42295	1.63839	2.10998
AKR7A2	7.94864	7.58791	8.63522	8.03673	7.98968	7.76138	7.49109	7.59767	7.93368	8.00933	7.65041	7.57854	7.23432	7.86082	7.54672	7.28352	7.99845	7.56753	7.66851	7.54164	7.9741	7.69939	7.70454	7.49982	7.58355	7.87356	8.1697	7.29036	7.86433	7.88125	7.84871	7.7405	7.88496	7.954	8.0684	8.17948	7.95863	7.79431	8.05117	8.26302	7.70248	7.97637	7.96095	7.86361	7.60582	7.63813	8.0485	7.43621	7.42349
AKR7A3	5.71092	5.09816	6.28371	5.44735	5.39288	5.51786	5.388	4.98665	5.77158	6.39695	5.2859	5.53234	5.78105	5.06662	5.798	4.87293	5.53955	6.08389	5.5502	5.66896	5.10947	5.78869	6.30079	5.29679	5.50269	6.10286	5.96919	4.71495	5.62351	5.53415	5.65476	5.73102	5.14258	5.62044	5.95195	6.05458	5.67342	6.31174	5.36484	5.67209	5.44661	6.27347	6.11939	6.4336	5.33896	4.8921	6.10028	5.14337	5.43141
AKT1	6.48537	7.33945	6.64051	7.12276	7.29823	7.38078	7.17355	7.18924	7.89669	7.5145	7.60519	7.97024	7.81268	6.89956	7.49775	7.23856	7.20675	6.26748	7.72323	7.39525	7.56156	7.16756	8.30128	7.63304	7.81548	7.91506	7.88708	7.28773	7.65887	7.30036	7.75855	7.71794	6.7497	7.54978	7.69625	7.75925	7.16152	7.44594	7.36842	7.90841	7.52498	7.37604	7.2772	7.62608	7.62481	7.23074	7.36842	7.74469	6.89376
AKT1S1	1.60938	4.8762	1.66197	3.93508	5.0232	4.97546	3.97458	4.54547	5.29679	4.65269	4.86453	4.39863	3.81639	4.45594	3.99012	4.36722	4.34883	4.64316	4.28501	4.11088	4.27091	4.61222	1.76772	3.63513	3.50458	4.69978	4.4431	4.36126	3.8191	3.85171	3.84022	3.8227	3.77625	4.83784	3.65933	6.04317	3.48054	5.26197	4.33353	5.10801	3.77981	5.03311	4.09271	5.71339	4.08499	5.73281	4.78693	4.6385	4.08263
AKT2	6.52123	5.73721	6.2564	6.56097	6.28981	5.61473	5.61688	5.67579	6.27056	6.24369	6.3652	6.01392	6.20903	6.23993	6.00648	6.22283	5.76353	5.99815	5.86144	6.04692	5.22409	6.12726	5.89603	5.79908	6.04425	6.17614	5.9378	5.6651	5.77122	6.25786	5.8692	5.89464	5.58181	6.02804	6.01833	6.23254	5.74554	6.30862	5.50347	6.30047	6.02663	6.02053	5.93626	5.7211	5.58487	6.04804	6.10102	5.6063	5.59937
AKT3	5.03149	5.35783	4.83495	4.92577	5.13677	5.10119	5.16987	5.15938	4.70983	5.34897	5.31334	5.22972	5.31866	5.28085	5.43141	5.136	5.3141	5.02903	4.96077	5.26833	5.41659	4.91833	5.0533	5.02535	5.35347	5.18193	5.10279	5.68644	5.11136	5.88673	5.21639	5.1141	5.6573	5.11457	5.58015	5.08716	5.68319	5.44189	5.40263	5.12924	5.50237	5.50578	5.81754	5.69743	5.74977	5.90505	5.21424	5.49536	5.42696
AKTIP	7.92569	8.27409	7.95552	8.00487	7.80261	8.40048	8.32626	8.31387	7.97637	8.1767	7.63617	7.90477	8.02053	8.74188	8.62377	7.93837	8.05512	8.26583	7.94553	8.13044	8.01255	8.21645	8.35627	7.84407	7.6743	7.93068	8.26682	8.10721	8.44604	8.16811	8.03759	8.06082	7.89826	7.88125	7.57297	7.46139	8.05352	7.81405	7.58294	7.56396	7.98028	7.88353	8.06082	8.30887	8.1995	8.04931	7.49827	8.00933	7.57477
ALAD	7.60452	7.46733	7.65108	7.28196	7.58921	8.06993	7.96797	8.40247	7.39471	7.80397	7.36188	7.88125	7.41567	7.52008	7.39471	6.67352	7.0403	7.53225	7.31679	7.78064	7.99371	7.81771	8.39524	7.99845	7.62608	7.51213	6.64253	7.68887	7.30618	7.05667	7.72185	7.95863	6.82116	6.86293	7.74256	7.53982	7.57536	7.8079	7.6743	7.48295	7.24224	7.34814	7.54863	7.76332	7.50165	8.13796	7.87432	7.37017	7.7999
ALAS1	8.89576	9.0316	8.89091	8.74724	8.84855	9.15314	9.25684	9.37789	8.89239	9.38002	9.07647	9.17412	8.41684	9.02814	8.45678	9.41109	9.28568	9.46699	9.10171	9.11102	9.00927	8.68538	8.86233	9.37549	9.40381	9.33412	8.89899	9.12917	9.12538	8.84233	9.41908	9.05216	8.60048	9.01494	8.98334	9.16661	9.2949	9.37307	8.98148	8.84537	8.94357	9.0399	8.9175	8.91451	9.46699	9.38002	8.83194	9.16661	8.5269
ALAS2	1.29894	1.27136	1.35149	1.35149	1.30588	1.30103	1.30315	1.32095	2.39753	1.2984	0.438086	0.8652	3.50458	1.67755	1.58943	2.99203	3.30099	0.033705	2.36328	2.4617	2.84878	0.20542	1.75486	2.99473	-0.11631	0.529792	1.01921	3.02067	1.16539	0.657204	1.80141	3.47588	0.729786	0.121591	0.798641	1.49047	1.67813	0.66059	3.10166	3.45181	1.91441	3.3478	0.0277791	1.58089	2.62567	1.50926	1.13484	0.282647	1.46094
ALB	3.14003	1.92845	0.725957	2.47049	2.51906	2.48654	0.679428	3.60054	1.75367	1.53175	1.65661	1.03551	1.61639	2.25015	0.192357	2.4988	2.92038	2.1597	4.03129	1.11062	3.58477	1.457	2.18288	1.41797	3.22843	1.92277	1.46906	1.52632	1.45231	1.26455	1.25567	1.32577	1.30489	1.3471	0.638976	1.79537	1.22471	1.78086	1.20159	1.89597	1.83539	2.70499	1.51094	2.8459	1.34061	2.89021	2.09165	2.23787	1.39137
ALCAM	5.40374	4.47038	5.13452	5.90166	5.80496	4.91332	5.27972	4.87446	5.47687	6.06228	5.36933	4.91993	5.24487	5.29227	5.15263	6.39807	6.29161	4.98939	4.98986	5.34562	5.72147	4.5053	5.14542	6.4465	6.77739	4.87329	4.72545	6.39324	4.78312	5.21311	5.25829	4.72755	6.25342	5.80912	5.4299	6.16953	5.53635	4.79882	5.4898	5.7782	5.56357	6.16689	4.26399	4.90713	4.93841	5.14258	5.79225	5.90021	6.78129
ALDH16A1	3.8808	4.12373	5.01241	4.08671	4.16669	3.54272	4.94799	4.29221	4.99994	5.11731	5.19751	4.75914	3.93845	3.40063	5.02791	2.40487	4.94757	5.04407	4.32977	4.79595	4.80652	4.50485	5.41507	4.83654	4.61656	4.84641	4.24788	3.70831	5.13715	4.31909	5.35486	5.04725	4.1735	5.05643	4.84641	4.80971	3.07833	5.39175	3.74426	5.46502	3.76442	3.95896	4.3058	4.72509	4.60153	5.39613	5.45647	3.72985	4.62042
ALDH18A1	5.33975	6.01644	5.83402	5.26085	5.86144	5.48546	5.64499	5.81329	5.30573	5.43719	6.22324	5.56603	5.48509	5.30279	4.8857	6.15197	5.85613	4.8766	5.2045	5.67415	6.30565	5.92919	6.29313	5.87619	6.10628	6.53193	5.56461	5.59625	5.65696	5.11888	5.31759	5.10656	5.9338	5.76179	5.75752	5.85437	5.69238	5.89533	5.35416	5.69964	5.50726	6.10778	5.33538	5.02364	5.44848	6.12546	4.95294	6.063	6.16467
ALDH1A1	4.57931	5.32023	4.293	3.62865	4.93191	5.41317	5.81924	5.71479	4.44398	4.91095	6.19769	5.6154	4.31946	4.44617	4.65399	4.5625	6.33812	5.24936	6.35341	5.82026	6.00513	4.82276	5.0682	5.06745	5.79559	4.53606	5.63018	4.89283	4.75454	6.02559	5.08157	4.91833	5.97951	5.97019	4.05227	5.06421	5.44393	5.00805	4.86708	4.50275	4.5699	4.98291	6.12685	6.08353	4.41803	5.21677	4.70062	4.84835	6.73391
ALDH1A2	1.98501	1.91286	2.01612	2.0635	1.94939	3.15263	1.94574	1.97305	1.91794	1.35869	1.57783	2.19672	0.200288	2.62395	1.01333	0.374236	3.68845	1.89361	3.29691	0.287311	2.96017	1.38032	1.12716	1.50747	1.99712	1.42549	3.89606	1.37316	1.39935	2.156	1.68167	1.73857	2.7547	2.7709	0.364861	1.8834	3.19161	1.55645	1.67642	2.00193	0.852895	2.28664	3.03073	2.23666	2.16444	0.894138	0.449292	3.75942	0.704756
ALDH1A3	5.80395	4.42647	1.95437	3.58764	4.39036	3.35674	5.14882	4.22021	4.46703	2.91964	4.00068	4.70722	4.15611	4.18579	4.15879	3.9172	3.32518	3.05153	3.60114	5.7501	5.85943	3.99771	4.3722	5.06462	6.49741	4.60532	2.38136	4.89797	5.43684	3.8097	4.54284	2.49223	4.28374	2.69824	3.65531	1.93604	3.81356	3.96559	4.03978	3.65068	3.28672	1.84454	3.27573	1.79835	3.15126	4.19144	3.51734	3.40699	3.76592
ALDH1B1	5.5759	4.5815	5.88291	5.21639	5.3296	5.58927	5.18684	5.59095	4.97786	5.53857	5.31372	5.14146	4.30883	4.91954	5.68351	5.26038	5.20524	5.13337	5.40587	4.85895	5.82371	4.96705	4.34125	4.73853	5.31021	5.75712	5.55548	5.381	5.2045	5.81399	4.97307	5.12962	4.34255	5.37085	5.26619	5.3792	5.03234	5.04169	5.06177	5.17581	5.14618	5.73794	4.78783	5.69002	4.97588	5.9945	5.98678	5.36234	4.73267
ALDH1L1	5.11253	5.90234	4.92461	5.33863	5.91646	5.60696	5.23671	5.61107	6.75266	5.80109	5.4806	6.05634	5.42166	4.67511	5.50049	4.97546	5.93485	5.73962	5.94109	5.13914	5.43645	4.73983	5.64047	5.45581	4.97546	5.86618	5.97409	5.35087	5.06783	6.03981	5.63902	6.08067	4.91216	5.6619	5.01086	6.26236	4.88094	6.42934	6.05423	5.84161	6.3233	6.4241	5.55443	6.05243	5.38611	5.75298	5.49236	5.09305	4.84996
ALDH1L2	3.25849	3.5097	3.09276	1.34441	3.33334	1.29495	3.28507	2.82876	0.0174932	1.26455	2.73287	2.81894	1.40823	1.71192	1.12359	0.793942	3.07635	1.45071	1.8834	2.04796	4.03931	2.13337	2.80202	3.34611	1.51465	2.01515	3.29865	1.60184	2.74333	1.70775	1.3043	2.50203	3.38249	3.2561	1.79835	2.59143	1.3886	3.84123	2.99473	2.51403	1.95799	3.51298	2.12328	4.07375	1.6602	3.66297	2.41659	1.75486	4.77993
ALDH2	10.5596	10.5237	10.1575	10.6694	10.5479	10.3288	10.6084	10.4616	10.7212	10.3095	10.6333	10.5237	10.5006	9.95503	10.2178	10.2129	10.4403	10.399	10.4897	9.90885	10.1403	10.271	10.2527	10.4351	10.7138	10.222	10.73	10.4897	10.0957	10.3741	10.7056	10.2257	10.4147	10.5712	10.5712	9.9014	10.5543	10.6017	10.3011	10.2129	10.2302	10.6333	10.4782	10.4725	10.4835	10.4951	10.2625	10.3741	10.1524
ALDH3A1	3.45684	3.08594	2.02468	3.41553	4.6298	3.09794	4.36167	0.979906	2.69142	2.0059	2.30849	3.11513	2.87852	4.18434	2.38593	1.50808	4.59791	1.86181	4.5776	0.833224	3.57003	1.7439	3.1756	0.890481	4.49229	1.50171	2.80027	3.72619	3.30575	3.12191	3.36082	4.00519	3.2015	3.3146	2.9098	0.812714	1.96668	4.02853	2.90544	3.46498	1.10177	4.12954	1.89766	1.33649	3.17301	1.21277	3.06292	1.69444	1.87371
ALDH3A2	7.51568	7.6814	7.68507	7.52244	7.70844	7.68012	7.8289	7.70188	7.11133	7.66068	7.6814	7.69687	7.97564	7.96949	7.63235	7.96019	7.16961	7.4505	7.22817	8.34675	7.95781	8.06334	7.82255	7.88353	7.70844	7.85581	7.59831	7.82761	7.29321	7.69305	7.21798	8.30786	8.10383	7.77003	7.98263	7.78521	7.52874	7.49722	7.96243	7.91728	7.62418	7.37447	7.43507	7.62801	8.25501	8.09969	7.49478	8.13128	8
ALDH3B1	4.73226	5.2011	4.75288	3.89184	4.57414	4.66188	4.46032	4.58412	5.1519	4.73452	4.33809	5.38723	4.16344	5.22249	5.15371	4.76797	5.21867	4.32238	4.17014	4.15506	4.68689	3.56408	5.71794	4.15506	5.66581	4.75495	5.20964	4.40617	4.76628	5.08157	4.50699	5.10358	4.07849	5.26085	4.75002	5.4537	4.74873	5.13263	4.40715	5.40883	4.13587	5.23468	4.52283	5.1731	4.88892	5.78768	4.89245	4.63632	5.57981
ALDH3B2	1.64377	1.6078	1.69558	1.69837	1.63839	1.6444	1.6444	1.96206	0.929537	0.944506	1.39879	1.3026	1.40769	1.7409	0.215338	0.230684	2.30723	1.94069	1.66619	1.56089	1.49111	1.20615	0.852228	1.67033	1.54816	2.5835	2.42721	1.27868	1.69837	1.18295	1.70717	1.97125	1.67215	1.1934	1.87735	1.3026	1.07812	2.0635	1.06043	1.20615	1.70604	1.83814	0.921596	1.01128	0.0773448	1.88856	1.10944	1.63786	1.45393
ALDH4A1	5.41244	5.33648	4.69623	4.87213	4.39732	4.49619	4.70111	5.26345	5.48765	4.81097	5.51447	5.11211	3.90511	4.8513	5.2304	4.10861	5.66752	5.33504	3.34183	5.30136	4.62423	4.69228	4.03218	3.86463	5.24675	5.81857	5.36524	3.80528	5.21639	5.4429	5.85575	5.29899	5.74618	6.87479	5.31677	6.53307	5.46307	6.06154	5.03023	6.8775	4.96291	6.47724	5.26307	5.55902	4.83248	6.03134	5.11659	5.63229	4.31731
ALDH5A1	6.16206	6.55339	6.70884	7.24224	6.75306	6.26907	6.57315	6.12084	6.54632	6.76004	5.91891	6.35574	6.04175	6.58582	5.49312	6.1747	5.93235	6.62766	6.16537	5.96186	5.36451	6.18345	6.26604	6.47318	5.40049	6.67591	6.87356	5.92563	5.96512	5.89089	5.52215	6.48855	6.056	6.62104	6.89341	6.57516	6.83537	6.73427	7.04087	6.60666	6.426	6.56422	6.66902	6.32941	6.23142	6.859	5.69814	6.41645	5.41955
ALDH6A1	7.49879	7.86502	7.37826	7.63434	8.194	7.44772	7.40987	7.57297	8.29663	7.17996	7.42517	7.38759	7.90258	7.44034	6.97736	7.27137	7.43922	7.78252	7.73845	7.23273	7.04381	7.53982	6.9801	7.69625	6.9801	7.33316	8.20596	7.14555	6.82646	7.25503	7.34706	7.66326	7.76596	7.88496	7.67827	7.45828	7.72672	7.71096	7.98263	7.63685	7.927	7.72323	7.8508	7.53539	7.97326	7.90325	7.23371	7.65041	7.16715
ALDH7A1	6.54752	6.68162	7.40584	6.59219	6.80899	7.12894	7.34765	6.96904	7.1848	6.97522	6.64453	6.96132	6.88274	6.5089	6.53617	6.51564	7.8341	6.80732	6.90089	6.83317	7.13454	6.68274	6.94031	6.77874	7.02432	6.61931	7.4357	6.39366	6.64771	6.71948	6.63925	6.75671	6.49008	6.859	6.45916	6.96132	7.17697	7.30952	6.67758	6.51286	6.99838	7.30786	7.09929	7.23273	6.57855	7.05416	6.24991	7.12894	6.32369
ALDH8A1	2.43428	3.03683	0.546272	3.75942	2.90307	3.96042	3.60502	0.968856	3.70781	1.93433	2.52072	1.52128	2.97672	2.1144	1.25388	2.96366	3.57625	2.78165	1.54816	0.497197	0.0823892	3.35798	0.169861	3.12796	3.94657	1.58662	2.45798	1.97788	1.91043	2.44172	4.01254	0.845128	3.56633	2.93211	3.70367	4.41931	3.06358	2.60577	1.49047	0.900098	2.78091	3.43227	1.61698	3.44376	3.26268	3.77154	2.91046	2.5229	3.2129
ALDH9A1	9.07647	9.30704	8.98334	9.2834	9.00927	9.14184	8.85322	8.98823	8.44401	9.08117	9.20523	9.32101	8.97798	9.29011	8.84537	9.3964	8.74475	9.04878	8.89407	9.1988	8.90201	9.16076	8.90501	9.13513	8.77827	8.90976	9.42637	8.87068	8.96867	9.08117	8.874	9.24547	9.26759	9.31143	9.57418	9.62892	9.31143	9.51625	9.12032	9.40381	9.48731	9.66883	9.00537	9.15122	9.288	9.40122	9.33224	9.43862	9.09995
ALDOA	10.3011	10.0608	10.088	10.3238	10.3336	10.7138	10.3288	10.2813	10.5479	10.4725	10.2	9.93765	10.1913	9.90885	10.3288	9.76138	10.4897	10.1825	10.4668	9.84467	10.4403	10.1575	10.3943	10.2385	10.4147	10.5421	10.3489	10.3489	10.2578	10.4099	10.2962	10.0649	10.1322	10.6694	10.4351	10.5774	10.2257	10.4782	10.399	10.4835	10.0449	10.3537	10.1482	10.3741	10.3943	10.684	10.4242	9.95503	10.2385
ALDOAP2	1.63147	1.5953	1.68392	1.6875	3.55385	1.63497	1.63433	1.64261	1.31453	1.42597	-0.183949	1.16012	2.58156	1.84798	2.60297	1.87891	2.82062	1.7633	0.178667	2.8932	1.35471	1.93915	1.53126	2.00938	2.12646	1.08376	2.62935	2.3395	3.26083	2.90839	3.7551	1.32844	0.56863	2.1978	1.13714	1.67395	0.0103481	3.61727	0.142461	1.52741	1.56033	0.455522	0.130522	3.39343	2.32082	1.42597	0.241364	1.64798	0.900813
ALDOB	3.16612	2.83326	3.59524	3.18541	2.61711	3.06736	3.80867	3.1243	3.00297	3.5806	3.0106	3.74273	3.9408	3.55511	3.44597	3.29297	3.96519	3.66984	3.11513	1.86696	1.60993	2.85381	3.32403	2.5303	3.42442	3.06358	4.05405	3.42383	1.88856	4.34345	3.80271	4.19582	3.01352	3.6312	3.71047	3.03892	2.11544	3.1438	3.83445	3.98664	3.29865	3.80771	3.01924	3.79687	1.75974	3.17178	1.448	3.68155	2.14282
ALDOC	8.71864	8.66593	8.07568	9.16661	8.49067	8.96867	9.18421	8.64241	9.65817	9.46214	9.21595	9.01959	8.69342	8.08068	8.05913	8.89576	9.80821	9.2949	9.18216	9.0212	9.55371	7.81141	8.13456	9.44098	9.27411	9.9445	9.40621	8.194	8.24637	9.37789	8.43366	9.24788	9.14725	8.95003	9.01494	8.85774	9.53403	9.58458	8.89407	8.69491	8.69342	9.37789	9.30285	9.19646	8.93691	8.95003	7.91658	8.90362	8.56154
ALG1	4.98063	5.38685	0.701758	4.94081	4.91754	4.89522	5.10319	5.08276	4.2474	5.63902	3.77048	4.29605	4.17396	4.27001	1.18355	5.47302	4.74032	5.73794	6.4425	5.47654	4.83085	4.29517	1.88608	4.61476	3.16987	4.10913	3.87693	4.37318	4.89439	4.47185	4.036	3.89089	4.36398	5.07608	4.90119	1.37374	2.39062	1.65358	4.61136	5.09969	1.54247	1.68273	5.03356	4.2507	3.44597	4.76839	4.01546	4.4057	3.95238
ALG10B	4.65189	5.14815	4.66706	5.10319	4.60658	4.42775	4.95175	4.5171	3.63814	4.47715	4.41032	4.8569	4.86453	4.66102	3.77205	4.49101	5.14063	4.31987	4.64196	4.85093	4.74062	4.94879	4.45062	4.82078	3.54485	4.30259	5.09741	4.36446	4.3833	4.74384	4.2189	4.64947	4.6844	5.10947	4.5546	4.57037	5.17581	5.33072	4.9404	4.96789	4.64531	4.7704	5.05534	5.35049	4.6298	5.00361	4.67336	5.18722	5.01918
ALG11	6.77263	7.14868	6.62624	6.97186	7.00373	6.99223	6.87975	6.96355	6.9195	6.8717	6.95715	7.22158	7.10653	7.19667	6.81675	7.02389	6.61402	6.94758	6.81762	6.92294	7.2237	6.87622	6.85761	6.82646	6.67992	6.64734	6.69179	6.80081	6.60845	6.97522	6.796	7.22817	7.15221	7.34765	6.87667	7.11825	6.9622	7.20322	7.1882	7.43392	7.17305	7.4608	7.25503	7.48699	7.08789	7.07828	6.56346	7.38253	6.80389
ALG12	2.18148	2.06238	2.17635	2.23422	4.0186	2.10324	2.11338	2.12646	1.68987	1.12359	2.98784	2.96878	1.36074	3.91326	1.26455	3.82951	3.02211	2.52702	2.90763	2.90907	3.7837	3.83976	1.1531	3.2561	3.35625	3.55385	2.92179	3.17178	2.90763	3.29919	3.32853	3.68799	3.30575	3.42553	2.96017	1.25286	2.59624	4.11965	2.25015	2.11338	3.90192	3.7523	0.599066	1.67584	-0.00551668	2.12765	1.40131	3.20446	3.21422
ALG13	5.69896	6.08422	6.10778	5.49424	5.74554	5.44464	5.78492	5.31759	5.90982	6.10242	5.40263	5.55514	5.37191	5.7782	5.84694	6.10666	6.05634	5.48329	5.04684	5.62742	5.65197	5.39976	5.16948	5.80912	5.81754	5.59547	5.27484	5.76538	6.06626	5.51375	5.85814	5.59277	5.97735	6.08691	6.05634	5.98717	5.76391	5.82511	5.74481	5.88291	5.52399	5.87963	5.70226	5.52291	5.495	5.97441	6.08648	6.06995	5.6769
ALG14	6.56346	6.55898	5.9531	7.02012	6.20577	5.93271	6.57441	6.62306	6.41576	7.36188	6.27165	6.49088	5.90468	6.57855	5.86076	7.38368	6.41274	6.33585	6.11162	6.3977	6.66157	6.3686	6.71481	6.29161	6.56178	6.46434	5.9949	5.97698	6.97186	6.84357	6.62624	6.18659	6.38979	6.6723	5.85613	6.73223	6.20172	6.30419	5.71514	6.10382	6.36631	6.16016	6.43567	6.35533	6.25263	6.52352	6.30231	6.36484	6.06995
ALG2	6.74435	6.63844	7.00183	6.89517	6.38907	6.65196	6.53854	6.75425	6.49206	6.86701	6.76004	6.55026	6.68955	6.58171	7.13348	6.25895	6.22959	6.39924	6.8253	6.65698	6.91455	6.5005	6.79073	6.59058	7.11581	6.525	6.14046	7.22522	6.8414	6.17687	6.3198	6.29275	6.14463	5.89262	6.39324	6.55543	6.38094	6.31937	6.08389	6.12803	6.38094	6.64651	6.37807	6.33549	6.39124	5.83402	5.97987	6.43997	6.13184
ALG3	5.70986	5.495	6.06481	5.52327	5.65618	5.55652	5.80325	6.02343	5.22446	3.99455	6.84871	6.9778	4.92699	6.58749	6.49088	6.25976	6.06336	4.26662	4.50441	5.4862	6.28756	6.00648	6.75707	6.81325	6.52743	6.98901	5.55443	5.47939	6.04175	5.90656	5.96003	5.08799	4.01817	5.7994	5.79008	4.60153	5.41917	5.40049	4.90393	5.32136	5.10358	5.15638	4.70475	5.08522	5.38835	5.18645	4.5789	5.16336	5.76508
ALG5	5.9629	6.53307	6.858	6.32209	6.24606	6.61601	6.58011	6.5081	6.49454	6.64008	6.78508	6.66237	6.48571	6.83845	7.07962	6.96176	6.74104	6.70924	6.47563	6.83498	6.66938	6.66237	6.63286	6.90051	6.78172	6.50652	5.9385	6.44297	6.97522	6.65778	6.83208	6.3135	6.54136	6.07876	6.33509	6.33474	6.26453	6.18419	6.19381	6.13845	6.4818	6.12803	6.29275	6.14653	6.54105	6.27385	6.426	6.83976	6.59809
ALG6	6.03349	5.33239	5.43141	6.13184	5.85717	5.65377	6.01501	5.83683	4.00977	5.39684	5.1614	5.5977	4.90763	6.15265	2.90011	5.88218	4.93589	5.01677	5.60382	6.51246	5.84301	6.18723	6.14205	5.77351	5.41585	5.50347	5.48911	5.08276	5.43467	4.75329	4.64074	4.72172	5.19304	6.29313	5.39247	5.11923	5.28502	5.87963	4.75161	5.60973	5.0085	5.30005	5.11057	5.71615	5.1641	5.60487	6.00542	5.43787	6.8228
ALG8	7.33492	6.84953	7.03336	6.31619	6.55501	6.64734	6.75381	6.63374	6.45513	6.50771	6.82232	7.10755	6.90223	7.02518	6.90862	6.92252	7.0047	6.99799	6.34196	7.36238	7.27346	7.20124	7.02296	7.04958	7.31297	6.96672	6.22523	6.91765	6.98245	7.38978	6.69554	6.74752	6.3652	6.73179	6.78508	6.55855	6.88992	6.76088	6.80439	6.65445	6.69636	6.67841	6.46228	6.7056	6.77152	7.07304	6.41237	6.9078	7.1223
ALG9	6.34954	5.94803	5.6411	6.09555	6.4473	6.15672	6.14979	6.26679	5.80178	5.88258	6.05458	6.07579	6.49167	6.83124	6.112	6.2709	5.88466	5.79078	6.05026	6.62351	6.40555	6.42561	6.11975	6.05423	6.21867	6.07328	5.89603	5.84694	6.43724	6.46394	5.65657	5.86699	5.90166	6.13653	6.11781	6.08028	5.80879	5.69781	5.77676	5.5913	6.0328	5.86039	5.97951	5.55584	5.91783	5.91363	6.09399	6.29857	6.14795
ALK	0.780678	2.62567	2.49643	3.46449	3.64518	0.797891	2.31713	0.810398	3.66204	3.80271	3.77771	3.5839	1.47849	3.08283	2.49003	2.49333	5.10586	4.46572	1.39315	3.70531	4.04881	1.49111	5.07107	4.22699	2.65732	3.69706	2.9183	2.89794	3.70582	3.53319	3.15001	2.80507	2.88435	1.44692	3.53271	3.52369	3.92637	2.4809	1.86046	3.42935	0.815276	2.12328	3.36188	2.00193	2.63769	2.96017	2.7824	3.29175	3.11262
ALKBH1	6.25528	5.69781	6.06995	6.4563	5.84161	6.01908	6.13508	6.42147	6.29789	6.00648	6.3434	6.22171	6.12766	6.65006	6.63925	6.62228	6.40745	6.24458	6.77228	6.10286	6.14758	6.44809	6.32091	6.30527	6.5918	6.88062	6.43405	6.23701	6.18002	6.30351	6.49293	6.41809	5.95819	6.12046	6.99526	5.81229	6.47831	5.82192	6.12655	5.96849	6.65698	6.14723	6.35574	6.03555	6.75919	6.22929	6.79994	6.61881	5.60973
ALKBH2	5.23954	5.50124	5.80879	5.7266	5.0662	5.83902	5.33239	5.73999	5.94724	5.4451	5.70797	6.25342	5.85264	5.33648	4.77993	5.73539	5.79288	5.75972	4.21802	5.67952	5.83863	6.40473	5.83754	5.92882	5.83291	6.15118	5.48725	6.29161	6.70763	5.4121	5.80109	5.03107	5.99815	5.69703	6.2496	5.78346	5.97987	5.79008	5.20142	5.52571	5.66437	6.10955	6.07953	6.00849	5.64499	5.56461	5.93094	5.80426	5.54198
ALKBH3	5.49156	5.61688	6.46707	5.87744	5.20964	5.85749	5.57332	5.65307	6.70974	6.85421	5.88402	6.0428	5.55188	5.99414	5.46886	6.66489	6.52865	6.03316	5.70001	5.94545	5.24297	5.94187	6.42366	6.12833	6.30975	6.32941	5.63831	5.74033	6.4012	6.30494	6.51482	5.95055	5.65444	5.9568	5.78178	5.75635	6.15785	5.70546	5.31334	5.8151	6.04102	5.63327	5.88	6.07612	5.71442	5.56675	5.54766	5.73203	5.69855
ALKBH4	4.38892	3.79486	4.16297	5.09152	4.71546	4.99323	4.65617	4.27454	4.40802	4.84996	4.62609	4.26662	5.02405	5.36933	4.83905	4.72628	4.934	4.19009	4.64904	5.26938	4.65445	4.8139	5.54124	5.14146	5.57695	5.10656	5.17968	4.29136	4.27091	4.90624	4.41546	4.9396	4.414	4.8293	3.41167	4.76839	4.77651	4.49229	4.60194	4.8766	4.99796	5.16254	5.51226	5.4121	5.35087	4.59318	5.29869	4.68604	4.75914
ALKBH5	8.46811	8.0407	7.7344	8.52439	8.63275	8.31485	8.62099	8.37122	8.36228	8.22674	8.46811	8.38777	8.55712	7.75094	7.90841	7.92259	8.17759	8.22963	8	7.91263	8.06418	8.21545	8.42745	8.04291	7.93985	8.1096	8.18323	8.3931	8.07741	8.40869	8.40769	8.44401	8.08406	8.51891	8.15418	8.61975	8.33608	8.5318	8.32907	8.59676	7.85581	8.61587	7.87092	8.51213	8.48329	8.85159	7.39591	8.29477	8.05756
ALKBH6	6.61313	6.21479	7.16358	6.39807	5.90021	5.89464	5.89262	6.07249	6.27277	6.79511	5.9095	5.86144	5.73652	6.17138	6.25377	6.14653	5.94689	6.08534	5.99414	5.94145	6.06522	5.81329	6.71257	6.16356	6.80859	6.63208	6.38253	5.34237	6.14864	6.4575	5.7386	6.07837	5.45612	6.31549	6.35533	6.50334	6.11781	6.05818	5.95164	6.21089	6.35493	6.39056	6.3952	6.55145	6.19987	6.30047	6.18867	5.82371	6.11557
ALKBH7	7.13745	6.81325	7.536	7.15896	6.95758	6.93153	6.9324	6.93327	7.32378	7.21688	6.35918	6.68195	6.22895	6.44297	6.859	6.71178	7.55858	7.83034	7.84871	6.43851	7.05667	7.00747	6.70924	7.05329	7.6092	7.56396	7.27186	6.41423	7.05714	6.75671	6.87518	7.22675	6.36449	7.16715	6.94391	7.20775	6.91145	7.27778	6.46267	6.91455	6.60209	7.12075	6.73391	7.03625	6.55429	7.23909	6.3806	7.2237	6.51286
ALKBH8	5.29342	4.2266	4.76752	4.9735	5.34418	4.89483	5.04255	5.2045	4.26399	4.72429	5.44916	4.49229	4.5975	4.77915	2.98551	4.5639	5.28815	4.78144	4.86916	4.63158	5.01465	4.48001	4.86453	4.7111	3.59831	4.73011	5.05265	4.34075	3.90658	4.78656	3.93285	4.41803	4.62771	4.4876	4.4093	4.73491	4.82325	4.66448	5.0143	4.37082	4.91172	4.64947	4.83654	4.51375	5.12344	4.38241	4.54456	5.09508	5.01953
ALLC	4.23102	3.26209	2.52072	3.24046	3.21541	-0.665719	3.62097	3.03754	3.92812	3.51786	3.98815	3.425	3.82318	4.60658	5.91204	2.87388	4.3527	1.52741	3.11389	2.61803	4.48501	3.64612	4.35145	3.04556	1.51748	4.15464	3.5068	3.33334	3.73497	4.15464	3.9342	3.8191	4.56947	4.66314	1.55587	4.54809	4.8476	3.94752	1.56817	3.48611	3.4427	4.70309	3.25728	4.42913	4.68975	3.13614	4.20355	4.43004	3.96274
ALMS1	5.63399	6.12372	5.35904	5.95819	5.91464	5.77192	6.04317	5.76282	5.57261	5.79559	5.56357	5.79359	5.68427	5.74481	5.5808	5.57804	5.40954	5.66132	4.98331	5.84337	5.82122	5.67342	5.31158	5.75082	5.81164	5.4537	6.24074	5.12149	5.71203	5.53529	5.64256	5.69238	5.91089	5.98815	5.78703	6.0846	5.85943	6.10416	5.82661	5.93271	5.64467	6.18551	6.22994	6.16206	6.12224	5.47761	6.33585	6.12084	6.01314
ALOX12	4.27765	3.79687	4.0776	4.79553	3.69852	3.98615	3.80636	4.37668	5.14146	4.63679	4.56432	4.37491	4.14169	5.15715	2.74741	4.549	4.22749	4.06452	4.35588	3.78176	4.47236	4.54984	3.12136	4.95759	3.73763	4.60027	4.01817	4.53557	4.42125	4.44217	4.20935	3.97849	4.30619	4.69099	4.45238	4.43955	5.0188	4.79083	4.48256	2.48225	3.63077	3.18234	4.816	4.3161	2.56874	4.89361	3.9471	4.53033	4.00387
ALOX12B	1.36126	1.32844	1.41528	1.40823	1.36718	1.35869	1.35754	2.64545	1.36126	1.5132	0.963648	1.02313	1.08505	1.6	1.3964	1.13714	1.97894	0.266393	1.02243	1.25995	1.63786	0.174211	0.201484	1.01333	1.44109	0.960228	1.85401	1.40033	1.19698	0.66059	1.25116	1.61473	0.868853	0.64881	1.13891	0.232685	2.75546	2.91046	1.15126	0.95561	2.68495	0.864366	1.60184	0.651264	1.7482	1.17056	0.263427	1.17176	0.0277791
ALOX12P2	1.40645	1.37374	1.457	1.45231	1.41579	1.40347	1.40645	1.41969	0.714912	0.935785	0.408658	0.51292	0.815276	1.8812	2.82221	0.526507	1.21479	0.907022	0.397895	0.531382	1.8993	0.551327	0.776366	0.966911	0.0912831	1.07029	1.04522	0.791275	0.871995	0.935785	0.805254	1.03551	1.33948	1.18465	1.77467	1.39935	3.48315	1.72973	1.34121	0.291809	1.92117	1.457	3.15394	-0.138372	1.39248	1.56275	1.0381	1.71902	1.27199
ALOX15	2.41412	3.59678	1.39756	1.3886	3.83976	1.34278	3.27084	1.35523	3.05428	1.45745	0.64881	1.1081	0.166031	2.7824	0.671627	1.66197	1.93254	2.45798	3.92764	0.243309	3.06676	3.48105	0.842638	3.64215	1.66735	1.28451	1.3526	2.62307	1.13128	1.86998	2.92767	2.2203	0.265505	0.147238	3.05688	2.43931	3.00796	1.81643	0.263427	0.20234	1.38032	0.714015	2.22608	1.40232	0.986084	2.98415	2.45353	1.59472	1.77784
ALOX15B	4.08905	4.29136	4.73098	3.05824	1.60407	4.3807	3.44489	3.27022	3.59161	4.92848	2.82221	3.0846	2.67155	3.64969	0.968856	3.51892	2.4809	4.09994	2.79122	3.90751	1.44692	3.95286	4.68015	4.01735	2.26815	1.57347	2.99045	2.89641	3.425	2.82398	2.85381	3.06103	4.54247	4.5373	4.18121	3.73244	4.78917	1.59704	4.66358	4.4017	5.08916	4.1981	4.98136	1.08189	3.5349	2.89403	4.42125	2.91347	2.73803
ALOX5	3.33031	4.44617	4.5321	3.98185	4.54688	4.5886	4.50441	4.50228	4.80075	4.42958	5.06541	4.71757	5.18323	5.17185	5.29011	5.39013	5.2399	4.41145	4.74302	5.01465	4.83169	4.46209	5.15821	4.46523	5.18193	4.62469	3.55118	4.70268	4.83085	4.0969	4.5639	3.89807	4.69755	4.61309	3.56262	3.78624	4.48211	4.16012	5.10153	5.69111	4.35359	4.71413	4.14928	3.47813	4.24462	3.38195	4.25022	4.34883	6.84094
ALOX5AP	6.20903	4.97227	5.61177	5.67763	5.94508	5.53093	4.23102	5.39825	5.52571	5.22131	5.93455	5.69146	6.00124	5.4499	4.96247	5.41585	5.68897	5.7804	6.38134	6.95629	6.86335	6.25936	6.36068	4.57369	6.20949	5.39722	4.11614	4.68975	5.05265	3.98427	5.55617	4.14532	5.76081	4.1706	4.5828	4.44353	5.69002	4.42869	5.98921	6.29932	4.91915	4.79379	4.43309	4.08452	4.61868	4.39732	4.6217	4.60702	8.31583
ALOXE3	1.53561	1.50021	1.58423	1.58423	3.71582	2.45581	1.53175	1.54407	1.66852	0.964951	0.965563	1.56555	2.25015	2.08596	2.39402	3.4992	2.72229	2.79538	0.174211	1.77719	2.10663	3.3958	3.07508	2.6002	-0.201158	0.686985	3.43382	3.37852	2.93936	2.63487	2.97895	1.87371	1.72088	0.614465	3.30801	0.0854138	2.49003	1.94491	1.52241	0.348936	1.70377	0.990127	3.33565	0.663908	1.93095	1.79473	1.15073	2.27063	1.15368
ALPI	0.15298	0.131626	0.15764	0.169861	0.158918	0.160169	0.150803	0.153998	5.80879	5.74242	5.40916	5.68573	5.39131	1.52579	4.10399	1.90493	1.73392	1.87891	2.40841	1.82849	1.41688	1.51643	1.78788	1.40937	3.88954	0.0214831	1.18644	0.195315	0.272633	-0.0461083	0.793052	0.842638	1.38617	2.72939	1.37015	3.81166	1.78848	2.52072	1.65421	1.49481	1.50281	1.55134	1.92117	3.52733	1.52024	3.61727	5.50794	5.19625	5.09741
ALPK1	4.55588	4.79807	4.16575	4.25224	5.01585	4.09647	4.78229	4.60574	3.25451	2.80689	3.99818	2.70304	5.87619	4.3807	1.46809	3.57366	4.23841	3.58808	3.32462	4.98199	3.50246	4.53606	3.98427	3.00224	2.5303	2.7168	3.06033	5.03107	4.01689	3.90238	4.42731	3.76395	4.99636	2.67842	4.61961	3.34432	3.89713	4.52146	4.13051	2.79208	3.7089	3.40943	4.46349	4.13242	4.69939	1.62271	3.47094	3.83202	6.68037
ALPK2	8.34765	8.41467	8.52565	8.35627	8.44604	8.55612	8.22777	8.13796	8.54518	7.78592	8.13128	8.31848	8.81473	7.66522	7.60134	7.84602	7.89326	8.35165	8.15151	8.78686	8.35371	8.93866	9.03639	8.4035	8.42531	8.25003	7.96467	8.63275	8.37433	8.54901	8.30699	8.74188	7.69491	7.70383	8.12875	7.7185	8.01175	8.03226	8.72951	8.11368	8.02137	7.82827	8.45058	7.82396	8.19835	7.88566	8.40976	8.43722	7.4505
ALPK3	6.45131	6.77831	5.98358	6.27919	6.87841	6.88711	6.63651	6.39056	6.51765	5.90298	6.11057	5.66092	6.27572	6.82953	6.618	6.27806	6.23294	6.51436	6.08876	5.95018	5.51226	6.33848	6.80041	6.56872	5.51934	6.2627	6.64734	6.888	6.82445	6.34534	7.36435	8.01971	7.22326	6.76821	6.83976	6.40711	6.19007	6.32287	7.67632	7.05573	7.55356	6.49454	6.7309	6.10203	7.41225	7.23173	7.78316	7.28403	5.17883
ALPL	4.29093	3.72005	3.96519	4.84472	3.89905	4.06008	3.58764	2.63487	4.55899	4.9336	4.02987	5.05896	3.21353	4.14839	5.05371	2.90307	3.8727	3.15863	4.86956	4.1004	3.94222	3.73187	4.08132	4.80121	3.82066	4.84066	3.81864	3.73963	5.27452	3.44718	5.55548	4.7111	3.84789	4.00831	3.77154	4.2216	3.86463	4.82199	4.17997	4.86104	4.25864	4.68015	4.06111	4.49182	4.62937	4.78568	5.10947	3.83651	5.12619
ALPP	0.15298	0.131626	0.15764	0.169861	0.158918	0.160169	0.150803	0.153998	4.76797	4.69755	4.58236	5.01132	4.72042	1.47122	1.53126	1.1774	1.19474	1.38511	1.33948	1.27585	1.24781	1.15894	1.3964	1.15252	1.74033	0.0294912	0.679428	0.908548	0.69137	0.195315	0.638976	1.08871	1.09488	1.47561	1.22529	1.09312	1.18465	1.23647	1.23705	1.27868	1.17942	1.32256	1.42496	1.29781	1.20207	1.41528	5.12419	4.64574	4.47678
ALPPL2	5.30136	4.96914	5.01392	5.51337	4.90433	4.96749	4.86503	4.11923	5.09467	5.28239	3.05428	4.99116	3.22947	3.90422	2.9524	3.84524	4.3152	3.28448	4.86752	3.69307	5.45263	3.72934	6.35493	1.95518	5.42132	4.15657	4.74873	5.08116	5.21867	4.67127	5.09467	5.10801	3.41504	4.72545	4.632	4.16575	3.8462	4.97185	3.7837	4.32416	4.59318	3.86081	4.13002	4.68689	3.86368	4.99596	3.90474	3.18423	2.62935
ALS2	6.03094	5.97481	5.6073	5.68507	5.81055	6.01467	6.06962	5.93094	5.5367	5.67032	5.84191	6.18941	5.90267	6.07328	5.81164	6.2072	5.82192	6.56555	6.19877	5.85909	5.61831	6.10702	6.06522	5.92182	5.40916	6.08211	6.27165	6.00684	5.92461	6.3109	5.76081	6.10028	6.09841	5.84978	6.23848	5.82263	6.24299	5.77577	6.29972	5.76767	6.20314	5.60044	6.07876	6.00335	6.3109	5.62955	6.21162	6.2845	5.47196
ALS2CL	4.98456	5.60523	5.36095	5.36858	4.50485	5.20218	5.22409	4.96538	4.94164	5.08157	5.09347	4.9735	4.14351	5.00722	4.70435	4.48928	4.549	4.51178	4.22873	4.8569	5.34597	4.60153	5.39976	4.73772	4.94965	5.14219	5.13187	5.67915	5.7807	4.98826	5.05534	5.37455	4.29774	5.25043	6.03316	4.02853	4.70062	5.17146	4.82737	4.99876	4.37977	5.56499	5.05223	5.82473	5.13794	5.90656	5.85506	4.96914	4.52146
ALS2CR11	4.62651	3.25676	3.53319	3.30631	2.47779	3.05909	2.89476	3.82366	1.45852	3.77413	3.03892	4.55549	4.46123	3.04224	3.79945	3.54436	4.96291	2.96568	2.78968	3.69208	2.69824	3.77981	1.2068	3.74325	2.6833	1.21048	3.09927	1.38388	2.84422	3.94608	1.89	4.44259	3.69397	2.80416	3.07772	2.61422	4.00068	2.36785	2.79845	3.95238	1.46298	2.1932	3.7523	2.94564	2.05208	1.44537	1.89766	2.07203	4.67602
ALS2CR12	1.84932	1.79716	1.88856	1.92031	1.81704	1.82391	1.81768	1.84323	1.64916	1.97788	3.31576	0.725957	0.0416165	2.81978	0.0867757	2.68409	1.76212	3.67428	4.7496	1.90717	0.635066	0.977151	0.933909	2.6953	1.27685	2.6647	3.95664	3.56112	1.1365	0.596175	2.39501	1.7784	3.80475	3.01548	2.74232	1.7765	3.55118	1.62564	3.48211	3.43108	3.18602	1.07437	3.02658	3.50799	4.58062	3.3004	2.34445	4.42294	1.62498
ALX1	0.15298	0.131626	0.15764	0.169861	0.158918	0.160169	0.150803	0.153998	3.5927	3.84022	3.62597	3.9471	3.76145	3.58908	3.421	2.95882	2.63769	1.73392	1.61759	1.86253	1.64203	4.15247	2.61422	1.65959	1.7084	0.64039	0.0854138	-0.459521	0.358474	-0.246945	-0.503837	-0.551169	1.95022	2.83806	3.36669	1.5127	1.62979	1.31944	2.71343	1.64623	2.69336	1.9884	3.30153	2.68495	4.41351	2.2562	3.52369	3.86515	3.82066
ALX3	4.02853	3.54485	4.11416	4.69671	0.950671	4.37176	3.03754	4.0256	4.0256	3.63814	3.02	2.24675	1.85751	4.3126	1.18061	3.1157	1.62922	3.93655	4.50275	1.26913	1.51094	4.86625	4.71365	4.91869	4.69623	2.76586	4.13759	4.30303	3.52219	1.73618	4.35946	4.30087	1.02955	1.72201	4.36039	4.59791	3.88329	1.66082	3.86957	3.26497	3.86029	3.48611	4.57326	2.88514	3.8384	2.85804	4.0002	3.23118	3.39343
ALX4	2.84502	1.12191	1.20784	1.20086	1.15594	1.1648	4.40352	4.91714	3.10431	1.4449	1.85751	0.153998	0.68801	1.31453	1.19927	2.66191	1.32943	3.92903	3.53271	3.82011	1.6367	1.16135	0.0614989	3.36838	0.0632538	1.81584	3.24595	2.02564	1.53074	1.53283	1.52128	1.73799	3.11693	4.0776	1.18991	1.87971	3.76844	1.44537	0.214396	0.479811	1.67277	1.12412	0.794788	1.40645	0.547999	1.47561	1.39879	1.3958	1.09754
AMBN	3.69004	0.890481	0.984691	2.098	0.931114	0.950039	0.945181	0.977151	1.5815	1.37081	2.15112	0.889048	2.47664	2.02282	0.0651668	3.5822	1.14547	2.86021	1.53126	3.1438	1.67703	3.64676	3.25912	1.60993	0.0277791	1.87891	3.9408	2.25873	2.13138	2.07838	3.78224	2.75163	0.907831	1.27632	2.45467	2.58447	0.815276	1.63786	-0.316675	3.65933	0.873602	3.10118	1.6286	4.20845	2.95163	4.5066	2.634	1.02762	1.83044
AMBP	4.60153	1.46041	1.54655	1.54714	1.99215	3.82855	1.49533	1.50504	1.8993	2.17371	0.0594004	0.509157	1.57935	2.13337	0.246742	2.16913	2.63662	0.584727	1.98069	1.60349	1.6444	0.64039	0.632657	1.29169	2.63309	1.68008	1.66494	1.01414	1.09986	1.19276	1.06896	1.01611	1.77467	0.637629	0.984691	2.36328	1.21693	1.03487	2.05601	1.25218	0.749404	0.28029	0.263427	1.76455	1.07376	3.20446	1.90566	0.183825	0.734406
AMBRA1	4.75738	5.16486	4.98063	5.39431	5.08716	4.77651	5.08916	5.01241	5.08672	5.01001	4.93478	4.3586	5.19788	4.82371	4.0445	5.02671	4.69575	5.00111	5.02114	4.7569	4.67288	4.03171	4.19758	4.90351	3.86666	4.38151	4.89324	5.23918	4.55275	4.83128	4.47954	4.83941	4.68096	4.87446	4.71277	5.12033	4.67249	4.60702	4.95339	4.99636	5.13337	4.9854	4.70677	5.40883	4.57806	5.01465	4.46076	4.81312	4.58699
AMD1	8.21183	8.46253	7.62926	8.18581	8.60829	8.23615	8.32907	8.05431	9.054	7.92569	7.59884	8.3459	8.46131	8.12713	8.55158	7.49933	8.57798	8.45678	8.2559	7.72811	8.2287	8.58134	8.69621	7.7971	8.12957	7.74178	7.8289	8.31387	8.33309	7.81894	8.62234	8.7974	7.17007	8.03837	7.2127	7.9929	7.67044	8.29104	7.62671	7.64428	7.87663	8.03315	7.75164	7.99371	7.20675	7.66326	7.4263	7.70248	7.8508
AMDHD1	3.30344	2.84193	4.04695	2.89403	2.42081	3.84022	3.58908	3.03504	3.43885	3.62152	3.39801	3.272	4.47715	5.07763	5.27891	1.64561	4.23327	2.93804	2.20117	4.28547	4.55636	2.10424	2.61054	4.20171	4.51759	3.98858	1.51158	4.89914	4.3274	4.17109	3.62473	3.73914	1.6631	3.57003	3.83303	2.68026	2.06545	4.67717	4.24151	1.82391	1.38569	4.09098	1.69387	2.04273	1.81518	5.28627	3.70166	4.11798	3.13683
AMELX	3.41291	3.56408	3.6168	3.8023	2.98016	2.80689	3.95286	-0.359414	3.57468	2.93365	3.75899	3.80924	3.15201	4.44709	4.62817	3.09604	3.29063	3.64469	1.38328	3.08594	3.73497	1.70429	4.54688	3.90192	1.04901	5.02671	3.26083	3.24892	3.44541	3.70265	3.77311	3.20317	3.79021	2.91347	3.74534	4.13103	4.22749	2.79845	3.42161	3.87512	3.53754	4.31566	2.96088	4.3599	3.89089	1.47505	3.56112	4.30929	3.28628
AMELY	4.03978	4.19543	4.75651	5.012	3.21422	3.97458	4.18434	4.2189	3.2895	3.14875	3.66888	4.34302	2.80027	3.96185	0.291809	3.90605	2.60871	4.36216	4.73611	3.02351	4.47758	3.54218	4.87773	3.76344	2.26689	4.45062	3.46173	3.44166	3.74634	4.14973	3.55327	3.48787	4.33721	3.77099	3.32403	2.56475	4.72127	4.44129	4.60281	2.30126	3.41344	4.30929	0.951383	4.8619	4.93077	3.45129	4.51003	3.99972	3.51029
AMFR	6.01276	5.73828	4.85606	4.12674	6.66157	6.39253	6.31549	6.68657	6.4821	5.91891	6.19877	5.79494	7.3493	5.37191	4.72665	5.72552	6.66033	5.42921	5.798	5.9458	7.01021	5.73794	5.74554	6.26453	6.04836	5.85814	5.63547	6.41388	5.69632	6.46069	6.63493	5.93814	5.19123	5.71968	5.24675	6.0751	5.90057	6.47766	5.96365	6.80859	5.51786	6.30672	5.47336	6.49416	5.06384	5.14542	5.20605	6.04317	6.17358
AMHR2	0.15298	0.131626	0.15764	0.169861	0.158918	0.160169	0.150803	0.153998	4.20748	4.32283	4.08087	4.37176	4.33304	3.29002	1.91871	2.25991	3.45292	2.18007	2.25519	1.77905	3.09143	4.47556	2.34445	2.85025	3.11951	0.263427	2.68791	0.073684	-0.00991589	1.25447	-0.111247	-0.126665	3.34131	2.87186	2.72495	2.92399	3.24346	2.19672	2.95747	1.78026	3.48672	2.27063	2.54894	1.94939	2.51082	3.17982	3.9623	4.06822	3.88819
AMIGO1	6.08837	5.54352	5.65696	5.70876	5.77708	6.04578	5.76317	5.81785	6.26156	5.35745	6.17934	5.51738	5.61287	6.06228	6.01136	5.91016	5.3369	5.85014	6.10955	6.15942	5.39536	6.07151	6.27658	5.70226	5.73828	5.91678	6.10527	6.16884	5.52943	6.29275	5.71583	6.4453	5.62782	5.44545	6.5017	5.81297	6.34954	6.23623	6.04836	5.61831	6.51047	5.80178	5.97625	6.12224	6.57561	6.08498	6.19634	6.03134	5.5762
AMIGO2	5.96849	6.56954	5.46117	6.69767	6.28787	5.71548	5.82026	5.26497	6.14795	6.14723	6.76861	6.21635	6.21992	5.7413	5.19822	5.84191	5.57374	6.2411	6.84448	7.00747	7.48699	6.2055	6.35842	6.07612	6.81633	5.74842	5.69238	5.7859	5.4234	5.49635	5.78625	5.64367	6.8363	6.20211	5.76353	6.17794	6.53102	5.28545	5.2045	6.2821	6.07646	5.50871	6.56636	6.27277	5.76391	5.91428	7.54616	5.86813	6.17895
AMIGO3	2.7605	4.45948	4.36348	4.67424	4.64865	4.84996	4.42869	4.62084	5.53986	4.71998	4.19327	3.98956	3.96893	4.14973	4.53417	5.24221	4.37355	5.90093	4.7569	5.66471	4.70394	5.08871	4.11886	5.77307	5.00403	4.64316	4.73098	4.30716	4.87329	4.3302	4.69939	4.99477	4.07575	4.23275	4.46076	4.25636	5.0549	4.14579	4.43489	4.19673	4.78734	4.32786	4.28685	3.83605	4.42958	5.05643	4.92382	4.60898	4.25864
AMMECR1	3.00435	4.26399	2.13899	1.53561	4.10957	4.45816	4.34389	4.29735	2.27952	4.3953	1.71082	2.93365	2.01796	3.72874	2.52396	2.82728	2.81813	2.17023	1.75974	2.80931	2.26103	2.12646	1.54063	3.25849	2.30247	1.29332	2.75388	3.62597	3.63273	1.42708	3.56529	2.66752	3.33619	3.79074	3.22175	2.14647	2.44959	2.28412	3.85628	2.81489	2.30247	1.56657	1.54297	3.35798	3.00724	2.51189	4.26002	1.47988	2.54894
AMMECR1L	7.54616	7.6027	6.81446	7.4608	7.35418	7.33833	7.62853	7.50043	6.78508	6.94302	6.73349	7.12805	7.01439	7.79299	7.73378	7.19469	6.90953	7.33371	7.01439	7.05142	7.22271	7.13499	7.28835	7.01962	7.12318	6.82568	6.69464	7.64357	7.50221	6.8811	7.47585	7.03905	7.78064	7.18375	6.83665	7.29272	7.47642	7.09362	7.16806	7.10175	6.90652	7.12805	7.31729	6.52271	6.97186	6.67268	7.30453	7.57922	7.17592
AMN	0.864366	3.95616	4.71757	4.82199	4.1597	3.33788	3.92216	4.17196	4.78917	3.81782	4.01689	4.45238	4.14262	4.36446	4.24291	4.24332	3.31817	3.93004	3.93245	3.70733	4.47715	4.82078	5.54985	3.92545	4.81997	3.64469	4.3364	4.73693	4.87117	4.58788	4.75573	4.48256	3.125	3.00992	3.9286	2.76507	4.76137	3.86463	4.08762	3.23679	4.04695	3.57946	5.35233	3.00029	4.777	3.57892	4.19414	3.1438	3.26145
AMN1	7.17105	6.9778	7.32106	6.97325	6.57104	6.5582	7.13297	6.66115	6.75181	6.67555	6.67841	6.67143	7.04183	6.60622	6.10318	6.67108	7.06781	7.45715	6.97736	6.62583	7.28466	7.20575	6.73973	6.70607	6.22324	6.72282	6.89466	7.36333	6.19198	6.83083	6.89466	7.09644	6.34228	6.72316	6.19162	6.15453	6.5021	6.45827	6.43083	6.37335	6.55501	6.43052	7.19524	6.39124	6.64925	6.29088	5.5382	6.67992	6.53466
AMOT	5.73828	4.80328	3.67748	5.57043	5.37994	3.69307	5.92085	5.06501	4.23059	3.63077	6.03781	4.87739	4.39953	5.80642	3.05428	5.81096	5.65444	5.52399	4.37538	3.34946	6.32016	3.53902	4.22619	4.75368	3.92545	5.44767	5.89848	4.23754	4.45686	4.91754	4.21076	4.24517	3.22778	4.91137	4.5634	5.7601	5.41659	5.35347	4.54211	4.85093	5.4224	5.71339	5.1684	6.55339	4.55319	4.7774	4.78271	4.89559	5.64747
AMOTL1	6.2664	6.75058	5.74876	6.36556	6.10102	6.011	6.60754	6.80859	5.79425	6.1858	5.9422	5.69667	5.37493	5.67238	6.02876	5.47547	5.71339	5.84301	5.87067	6.25064	5.73828	5.60263	5.91464	5.63547	5.65444	5.75673	6.39324	6.02876	6.44691	6.54632	6.15834	6.39253	6.78301	6.22636	6.2072	6.57353	6.55105	6.66981	6.52622	6.44383	7.07162	6.67803	6.27203	6.05059	6.44036	6.34994	7.32697	6.37021	5.24936
AMOTL2	8.31583	7.82324	7.13853	8.61226	7.84335	7.20575	7.56814	7.48766	7.15171	7.64357	7.09929	7.62481	7.32378	7.74534	7.97798	7.24696	7.54863	7.15171	7.46664	6.65483	6.28136	7.65887	7.59523	7.29374	7.15507	7.15124	7.78665	7.22003	6.7497	7.2772	7.26389	7.04573	7.72811	7.67895	7.24224	7.59329	7.48645	7.81343	7.63561	7.83034	8.39632	8.20596	7.59709	8.00412	8.05592	7.936	8.53437	7.13049	6.91812
AMPD1	2.34565	3.31278	4.36488	2.28412	0.501419	3.93371	4.06162	1.99605	1.86998	1.92117	3.55729	3.10299	4.10861	1.81397	3.37006	0.626304	3.04158	3.00297	3.69208	3.5147	1.6023	0.929537	4.92108	3.90059	1.32628	2.09899	1.53283	1.25116	1.32844	1.53175	1.42824	1.37864	1.40645	4.26089	4.89283	4.09555	3.24892	2.07645	3.35283	0.962128	1.15951	4.48421	1.86332	4.52859	3.70367	3.66657	1.73155	2.44618	3.27328
AMPD2	5.12344	5.28938	5.46961	5.22591	4.98136	5.26974	5.08157	5.44882	5.8102	5.31334	6.18618	5.47547	5.66896	5.45227	6.059	5.90808	5.68611	5.52943	5.88105	5.90234	5.39502	5.48162	5.50983	4.36263	4.9825	5.45155	4.9505	5.85909	5.83545	5.55224	6.27844	5.37191	5.98496	5.85264	5.32744	5.18845	5.29679	5.21977	4.95583	4.68645	5.28206	5.12419	5.01241	5.16636	5.70546	5.70876	5.34018	5.21828	6.21992
AMPD3	6.53728	5.29048	5.61287	5.39131	5.37493	5.83432	6.32745	6.56386	6.22597	5.66896	4.36446	5.18722	4.93153	5.35745	3.36838	6.84532	5.70797	5.82762	4.71159	6.24789	6.25455	5.8692	5.24709	5.89748	4.57499	4.37842	5.09217	5.50422	5.22706	6.23254	5.34375	5.66716	5.75152	5.1645	5.03311	3.91574	5.80813	5.35638	5.92813	5.66716	5.61432	5.50794	5.3814	4.7434	5.62955	4.78868	4.35103	5.21867	5.45752
AMPH	4.67469	5.2045	4.23193	4.35359	4.84641	4.91428	4.44891	4.378	5.71235	4.55765	4.90713	5.01086	5.30005	5.08522	4.6157	5.40125	4.51178	4.48047	4.36263	4.5789	4.30487	5.45407	5.4568	4.9825	4.89283	4.80609	6.02343	4.67127	4.54502	6.50971	5.04644	5.63514	5.32376	5.90808	4.85648	6.24337	4.99155	5.40224	4.89324	4.87487	5.91857	6.18514	5.27781	5.71412	4.31946	4.71959	4.81183	5.83143	4.60113
AMT	7.76666	7.96711	7.81141	8.14557	7.49663	8.10721	7.37128	7.07734	8.02653	8.1879	7.79031	7.30509	7.86942	7.55095	7.60519	7.52126	7.76745	8.05431	7.71673	7.37235	7.03905	7.46139	6.96176	7.71794	7.39942	7.82396	8.18223	7.13194	6.78129	8.01175	7.21024	7.8773	8.06762	7.8751	8.08918	7.40234	8.04635	7.83843	8.30321	7.8341	8.30516	7.85155	8.33899	7.98263	7.92108	8.1767	8.39105	7.64297	6.79073
AMZ1	5.28701	3.91175	3.78121	4.92265	5.28502	4.4889	4.45729	1.94574	3.92764	3.18482	1.6572	2.7456	2.49101	3.16612	1.62109	2.91964	1.71957	4.20265	3.85682	2.45353	3.84735	3.38884	3.13872	2.30969	0.947346	1.33142	2.37644	3.24722	3.40063	5.00195	3.43281	4.39632	1.90088	2.22826	1.8834	2.22957	4.36667	3.71582	2.59527	2.6833	4.11758	3.95184	1.48368	4.49315	1.66677	4.90433	3.86957	2.60666	1.94674
AMZ2	8.84537	8.63522	8.43366	8.88001	9.01959	9.22848	9.31591	9.35705	9.24788	9.39215	9.30704	9.37549	9.42408	8.98675	8.66844	9.08698	9.33651	8.8769	8.86805	8.94357	9.0316	8.92556	8.75406	9.29265	8.3309	8.92883	9.53655	8.22777	8.83627	9.1312	8.70003	9.21994	9.21413	9.21178	9.6826	9.47261	9.33864	9.01298	9.32313	9.02466	9.33412	9.24547	9.49493	9.00043	9.42408	9.21994	9.17621	9.15122	8.99702
AMZ2P1	6.50847	6.22929	7.05285	6.38942	6.03422	6.52701	6.62848	6.71526	5.86039	6.74352	6.61017	6.23066	6.01501	6.81363	6.06336	6.07328	6.90737	6.21792	6.34077	6.23066	6.04465	6.62766	6.05526	6.40002	6.66571	6.37289	6.62269	5.75873	6.29501	6.56555	6.05526	6.71696	6.63452	6.62015	6.68077	6.57315	6.60325	6.0818	6.63687	6.0451	6.73632	6.50618	6.98332	6.37335	6.9386	6.45791	6.41982	6.97691	6.39014
ANAPC10	6.41388	6.1397	6.73886	6.00648	5.88951	6.1927	5.79359	6.09841	5.88918	6.62104	5.8333	6.01606	5.80109	5.98206	5.36095	6.38633	6.33622	6.12685	5.56675	6.1587	6.28604	6.23588	5.86846	6.5009	6.09186	6.32016	6.4146	6.1233	6.27919	6.45093	6.02085	6.36293	6.22207	6.22815	6.50016	6.60845	6.43083	6.12372	6.25853	6.18034	6.6922	6.5679	6.53102	6.11939	6.31319	6.21635	6.13845	6.82568	6.11233
ANAPC11	8.9065	8.39741	8.82493	9.0399	8.92556	8.81755	8.86379	8.65561	8.76992	8.86935	8.55935	8.71613	8.61842	8.73504	8.51087	8.73777	8.78824	8.91451	8.68391	8.95489	8.55158	8.75281	8.49442	9.00537	8.8088	8.6437	8.50103	8.70656	8.75281	8.94198	8.76857	8.63275	8.70253	8.20596	8.5075	8.35824	8.71353	8.25408	8.65439	8.38097	8.63414	8.12032	8.68538	8.31387	8.54271	8.32137	8.37715	8.4786	8.32424
ANAPC13	9.32775	9.34085	8.90501	9.41908	9.34543	9.15495	9.1333	9.21178	8.9585	8.81185	9.35929	9.63141	9.14907	9.24788	9.01818	9.39886	8.91602	8.88297	8.86233	8.94198	8.66844	9.23911	9.01494	9.35201	9.1312	9.00368	9.26526	8.53933	9.35705	9.10922	9.17412	9.25039	8.92556	8.96531	9.38977	9.4287	9.00537	9.21812	8.83061	8.78248	9.53403	9.64454	9.32313	9.38002	9.10369	9.23456	8.80468	9.54118	9.22654
ANAPC16	9.54815	9.33224	9.43361	9.41109	9.68752	9.0399	9.14016	9.01959	9.40381	9.0165	9.50519	9.61201	9.54815	8.76437	8.94832	9.0299	9.32775	9.35929	9.57947	8.86667	8.86805	9.25478	9.16266	9.29682	8.98675	8.90201	9.10369	9.2633	9.23269	9.38484	9.24788	9.66304	9.55371	9.34944	9.67454	9.49996	9.52397	9.50798	9.44304	9.46699	9.60504	9.37048	9.51889	9.60734	9.3964	9.43361	8.46921	9.62611	9.3185
ANAPC2	4.00206	4.50354	4.82648	4.37624	1.85972	4.80328	4.0606	1.88049	3.23802	2.97672	4.16881	3.38022	3.3602	2.58156	-0.150766	1.03222	3.43715	3.75361	4.18625	1.13484	3.60927	3.52312	3.08675	3.09726	3.94271	4.42554	4.0545	3.09074	2.78549	3.80771	3.37575	4.18209	3.32978	3.79486	3.94324	4.21439	2.96366	3.59568	3.99305	4.28772	3.91878	3.85584	4.24829	4.014	3.13239	4.44709	3.68502	3.42047	2.12425
ANAPC4	7.75925	7.68959	7.58236	7.4087	7.37072	7.57611	7.43978	7.6222	6.539	7.1401	7.37017	7.17305	7.45418	7.31353	6.6397	7.17697	7.45828	7.13853	6.90313	7.2042	6.88235	7.47984	7.38423	7.33945	7.25007	6.90908	7.23738	6.70841	6.83498	6.95629	6.91335	7.04291	8.0134	7.55747	7.43805	7.36435	7.09871	7.11084	7.30509	7.0112	7.45715	7.01484	7.73104	6.81762	6.94577	6.94209	7.05049	7.40639	7.82324
ANAPC5	7.65557	7.66393	8.1697	7.56216	7.60452	7.47474	7.21688	7.17058	7.49358	7.47201	7.78389	7.79506	7.84732	7.75646	7.70512	7.73711	7.63372	7.64173	7.60329	7.43978	7.27137	7.48096	7.6318	7.53162	7.79156	7.80726	7.56633	7.06186	7.59268	7.40987	7.38921	7.47259	7.98811	7.37504	7.58049	7.1716	7.66781	7.23173	7.26992	7.38078	7.68283	7.25722	7.68827	7.26236	7.46325	7.16462	7.11176	7.73311	7.75298
ANAPC7	7.12852	6.83167	7.24644	6.76178	6.64845	6.9838	6.888	7.01484	6.63883	6.59097	6.93591	7.04522	6.89606	7.23533	6.9838	7.20634	7.12709	7.01908	6.87796	6.97606	6.9622	6.99945	7.04336	6.66826	7.18528	6.58541	6.71065	7.03525	6.90395	7.2302	6.9288	7.10895	6.66319	6.62766	6.69814	6.41353	6.93495	6.85421	6.92294	6.65361	6.85139	6.86437	6.70719	6.53235	6.69	6.39554	6.38452	6.9847	6.50771
ANGEL1	5.64678	5.38426	5.77646	6.04578	5.68965	5.36346	5.51738	5.36595	5.43613	5.71052	5.59878	5.4844	5.76111	5.37596	4.18434	5.43973	5.42272	5.7102	5.63442	5.62955	5.67618	5.76469	5.46197	5.41698	5.31719	5.56639	5.92394	5.72842	5.10544	6.19701	5.1828	5.5126	5.52794	5.06219	5.47654	5.66369	5.49083	5.53199	5.2194	5.30839	5.66686	5.7299	5.19586	5.69781	5.16712	5.81297	5.64747	4.99116	4.88849
ANGEL2	6.38907	6.25528	6.08876	6.24032	6.21201	5.91929	6.15834	5.88466	5.96732	6.29464	5.86846	6.10666	5.86846	6.0751	5.77016	6.22207	5.74202	6.13111	6.37371	5.36742	5.87363	5.87923	6.00124	5.73828	5.66015	5.52399	6.09662	5.64467	5.84731	5.81857	5.74277	5.6769	6.11748	6.23478	6.20431	5.97125	6.1858	5.75533	6.20903	6.0768	6.40901	6.06374	6.38792	5.72007	6.0891	6.03062	5.93553	6.38486	6.2055
ANGPT1	5.07527	6.11939	4.4057	5.50794	5.94878	4.1981	4.5019	4.15017	4.04018	4.30259	5.72327	5.96146	5.1828	5.26383	4.51846	4.96414	5.57804	4.20306	3.87217	5.40771	5.34562	4.24064	5.50688	4.66015	5.44393	4.58018	5.08757	3.88954	4.40393	5.00965	4.21614	4.67602	6.69852	5.0232	4.74748	4.70765	5.30352	5.15403	5.33397	5.06705	5.56818	5.92427	5.90914	4.78997	5.47836	4.12235	5.4121	4.73532	6.28756
ANGPT2	4.00474	3.15744	4.24373	2.60297	3.05563	5.25395	3.09726	4.39209	5.16015	2.62651	3.94324	2.79453	5.2156	5.26619	6.1089	3.70367	4.12907	3.72566	4.26316	5.01632	5.2616	4.6298	4.35763	3.98664	4.38766	5.1684	3.29175	6.55186	4.64827	3.46728	5.12069	4.06254	4.10817	3.51141	4.84996	4.53336	3.31817	3.12562	4.87033	4.19327	3.20019	3.13303	3.50402	1.91794	3.37628	3.14508	4.54733	3.29628	4.68188
ANGPT4	-0.459521	3.98037	3.90141	5.25632	3.22476	1.53175	3.9674	4.79917	4.51375	3.95037	3.55171	4.30397	3.95896	4.3364	5.54352	3.41055	4.30845	4.77129	5.39325	2.25873	4.72381	3.63216	3.23679	3.46829	2.51189	3.54003	4.78401	5.29416	4.58546	5.22626	4.12543	5.42881	4.58452	5.48298	0.978508	4.9854	3.2668	5.08916	4.96953	4.59703	2.35791	3.86612	4.15424	6.04761	2.7143	5.71758	5.30431	3.80924	3.71047
ANGPTL1	5.94724	5.83368	5.79696	4.89324	5.56499	5.95921	5.69002	5.3369	4.99796	5.9766	6.58622	5.85814	5.9989	6.78714	6.52701	5.43325	6.35728	6.55105	7.10129	6.09662	6.49416	4.94297	6.0981	5.05066	5.40954	5.82296	6.33549	4.96538	6.07069	5.47939	6.112	6.06665	7.47023	6.99799	6.50417	6.75467	6.86034	5.99073	6.31823	6.76645	7.61055	7.02296	6.8717	6.91416	7.58419	6.88628	6.18975	7.12758	8.43722
ANGPTL2	6.95077	6.22672	6.94209	6.57696	6.86477	6.69299	6.46108	6.55429	7.30085	6.13071	7.74747	5.77351	6.40555	6.81494	6.91585	6.76773	6.8414	6.7669	6.73179	7.03336	6.63611	7.05329	6.92381	7.05191	7.59051	7.51325	6.18723	7.30734	7.35472	6.28718	7.49165	6.06962	7.13101	7.23371	6.69931	6.19634	6.20314	5.98815	6.74712	7.2042	5.84014	5.32671	5.95018	6.14126	7.37235	6.93677	6.05859	6.75058	6.71825
ANGPTL3	2.91347	2.31943	2.8516	3.57115	0.988784	2.74839	0.909276	2.60121	1.50448	2.69052	2.5853	2.27558	3.42763	2.57286	3.0321	0.196141	4.37176	1.68167	1.76634	1.84136	1.73392	3.46609	2.48558	1.41637	3.2416	3.99642	1.79035	1.71957	1.89766	2.57475	1.79589	1.82849	2.82647	0.819887	3.19719	2.0209	2.18399	3.05026	0.790506	2.86157	3.14003	1.87811	1.6402	2.60577	1.65902	2.32328	1.39817	1.89766	1.62109
ANGPTL4	1.29332	5.53598	1.34496	5.1568	3.724	2.97236	1.93682	3.12136	2.21014	1.13305	1.35092	-0.0333132	2.79758	3.79074	5.28159	2.72591	3.88374	0.130522	2.47971	6.02626	6.22853	5.48911	4.88849	2.38703	4.77475	3.90192	-0.0962802	6.24299	5.4451	1.68008	5.04684	0.289031	3.42442	2.20005	0.0632538	1.78911	2.81489	-0.316675	3.03504	3.50402	3.0167	3.55012	3.26972	1.47122	2.23553	2.21763	2.7277	0.206334	3.72874
ANGPTL6	1.33597	1.30588	2.74058	1.38269	1.34173	1.33891	1.33649	1.35029	0.599066	1.32891	0.908548	0.952746	1.59824	2.7709	1.68987	1.20898	1.24279	0.208452	3.63763	1.36339	0.150803	0.748492	1.27926	0.0193837	3.47943	0.682612	2.69437	1.04132	2.75871	1.25875	1.73093	3.21541	1.60121	1.21858	0.610648	0.596175	1.71957	1.14262	1.63147	2.90307	1.84268	2.03618	2.73721	0.925546	-0.10059	1.87971	1.21479	1.02822	0.0253627
ANGPTL7	1.30729	1.28105	1.36399	1.35754	1.31567	1.31002	1.3094	1.32989	-0.19264	0.522867	0.139802	0.15764	0.0808639	0.374236	1.32198	0.0883124	0.65833	0.529792	0.424199	0.136515	0.531382	0.960895	1.08003	0.62225	0.0927011	0.0433309	1.75661	0.230684	0.00588198	1.83389	0.230684	0.880387	1.47122	2.64232	0.305158	0.761037	1.41736	1.10744	1.6216	0.200288	3.45235	2.65732	2.83729	1.28742	0.244917	0.766466	0.881895	1.34394	-0.201158
ANK1	6.24925	6.92973	6.53617	6.55543	6.92211	8.13976	7.35852	7.85857	7.03722	7.04815	7.06362	7.16057	6.40519	6.88542	6.75306	6.64964	6.47682	8.06993	7.37398	6.30419	6.11517	5.88069	6.03349	6.74671	6.32595	6.92512	6.919	6.7559	6.50417	7.70902	6.8811	8.29663	6.50618	6.80472	7.24533	6.70684	7.9188	7.89755	7.57238	7.01021	6.73928	6.81112	7.15073	7.35305	7.3819	7.41225	6.43814	7.1716	5.7102
ANK2	7.77997	7.12362	6.7522	7.67496	7.77067	7.29434	7.75229	7.49775	7.24533	7.0403	7.92035	6.48098	7.62545	7.34379	6.56346	6.72243	6.97826	7.26845	6.84493	6.83934	7.24904	7.18046	7.30509	7.09783	6.98245	6.80732	7.80261	7.73711	7.47362	7.70724	7.33371	7.71464	6.95807	7.25662	7.86717	6.88369	7.72323	7.31938	8.01418	7.2237	7.35641	7.37504	7.77207	7.35803	7.80397	7.45828	7.60991	6.78878	7.23589
ANK3	8.77275	8.55021	7.96632	8.65692	8.68669	8.4721	8.70918	8.71353	7.66139	8.093	7.73578	8.29477	8.29384	8.7811	8.84393	8.36228	8.02217	8.21004	7.77207	8.44049	8.11213	9.194	8.76437	8.07649	7.91049	7.57419	8.90201	8.28432	8.6437	8.82493	8.31194	7.70248	8.07741	7.63685	8.4296	7.69881	8.14201	7.75855	8.43366	7.99677	8.49666	8.0407	8.31296	8.15418	8.21085	8.02357	7.56633	8.54648	8.02824
ANKAR	2.11106	3.24776	2.77428	3.83303	4.03171	3.01797	3.34183	3.36082	2.66375	3.34671	3.76798	2.56076	3.00992	3.97804	4.8893	3.96042	3.48724	3.71103	2.21386	3.13303	3.98088	2.75871	2.26945	2.42291	3.64676	2.00086	4.02853	2.44523	3.59942	3.63961	2.62471	4.04881	2.49528	3.60757	3.66888	3.80636	2.55175	4.37355	4.37755	3.53605	4.35103	4.15556	2.11746	4.15786	3.48946	3.81821	4.0256	4.73098	3.86234
ANKDD1A	4.67336	4.33203	3.92637	3.05563	4.70941	3.42817	4.44353	4.17997	4.92461	4.03405	3.90511	4.21127	4.04495	4.29475	3.65785	4.7569	4.84432	4.5673	4.56508	4.42958	3.10992	3.78689	3.95482	3.09927	2.41168	3.84426	3.46886	4.3841	4.70983	3.95846	4.74713	3.62597	5.00236	3.83976	4.41032	3.94752	4.46821	3.98956	3.46498	4.42647	3.72005	3.76247	4.09772	3.42604	3.15449	4.10542	4.67208	4.33157	3.47435
ANKFN1	0.651264	2.48558	3.26268	0.682612	0.808611	2.62395	3.0745	3.81864	1.76578	1.68392	2.38249	3.25728	1.75006	4.1663	1.28847	1.46753	2.22519	3.65583	2.96649	1.97125	2.65419	2.90839	1.81518	2.37014	1.71192	3.92405	3.61978	1.64377	1.82037	2.10121	1.74558	1.64986	1.87154	1.70775	2.97173	3.12857	1.06512	3.50857	1.39935	2.45932	3.13303	1.76518	3.69115	1.85679	3.13812	0.874403	2.46646	2.00086	2.16804
ANKFY1	4.40802	5.65476	4.8552	5.29461	5.51966	5.11802	4.82032	4.86829	4.7704	4.79882	5.52571	5.76875	6.02491	4.91915	4.93996	5.42132	5.78417	5.31562	5.39863	5.95886	5.07397	5.02444	4.24977	5.69855	5.20643	4.58743	5.24784	5.25432	5.64747	5.57261	5.44081	5.92919	6.02985	5.4806	5.62222	5.10395	5.4519	5.25506	5.49236	5.14919	5.28701	5.46702	5.84838	5.19868	5.58334	5.19625	5.31372	5.45796	5.61791
ANKH	7.61677	7.43805	7.25503	7.97723	7.44086	7.43234	7.1203	7.10463	7.74178	7.7344	8.04931	7.68074	8.26397	7.68573	7.87882	7.47023	7.43234	7.50629	7.50333	7.81969	7.68573	7.83843	7.60134	8.23709	8.12109	7.9548	8.15771	7.85019	8.1096	7.91958	8.03412	7.46252	7.53282	8.08576	7.54732	7.71464	6.99984	7.21122	7.31188	7.61795	7.71464	7.95331	7.77003	8.33899	8.16811	7.82324	6.89376	8.33996	7.64627
ANKHD1-EIF4EBP3	6.12546	6.86437	6.24074	6.618	6.78798	7.06688	6.57066	6.75965	6.74752	6.29387	6.66826	6.62423	6.87975	6.8802	6.19737	6.39056	6.76988	6.70225	6.34266	6.44883	6.18383	6.73632	6.90652	6.37415	6.37057	6.58622	7.73243	6.2496	6.30154	6.27617	6.42292	6.77263	6.59301	6.88669	6.97881	6.97826	6.70607	6.90395	6.86521	6.76483	7.31188	7.48645	7.10175	7.19234	6.65821	6.57729	7.47362	6.55304	6.34691
ANKIB1	6.90819	6.69636	6.49776	6.62766	6.6397	6.72874	6.72401	6.76048	6.10203	6.38212	6.92036	6.61759	6.90395	6.61842	6.23437	6.37251	6.12511	6.32125	6.75349	6.8431	6.68826	6.43997	6.49644	6.32125	6.20868	6.58706	6.58048	6.47246	6.00849	6.29019	6.14165	6.99089	7.20124	6.87356	6.60713	6.73391	6.66981	6.22636	6.90652	6.81853	6.80732	6.6922	6.61152	6.5582	6.84226	6.75745	6.47318	6.94577	7.00332
ANKLE1	1.04592	1.01611	1.09574	1.09925	1.05288	1.07202	1.0554	1.08376	0.180597	1.13426	0.273463	0.0400888	0.361515	1.3667	0.28029	1.44734	0.633874	0.557369	1.84996	0.231999	0.823351	0.85832	0.84748	1.08439	2.51809	1.05726	0.635066	2.73287	0.681378	0.791275	1.42128	0.566938	1.58662	1.69387	0.113813	0.284988	0.0954027	0.400684	1.00934	0.228778	1.59893	1.10569	0.889048	0.961571	0.204593	0.929537	0.748492	0.56863	0.0318453
ANKLE2	5.35005	5.51113	4.53606	5.26938	5.74481	5.25085	5.37957	5.09896	5.42166	5.269	5.19704	5.4519	5.22858	5.32181	5.41544	5.08077	5.05534	4.7569	4.75368	5.27388	5.63018	5.27781	5.16293	5.35864	5.25797	5.23427	5.34597	5.78346	5.59243	4.8114	5.73999	5.16672	4.64827	5.40374	5.07063	5.75972	5.17425	5.4912	5.21387	5.22249	5.22972	5.51152	5.31562	5.79977	4.94339	5.14694	5.84767	4.89094	4.89598
ANKMY1	1.44585	1.41316	1.49533	1.49317	1.44913	3.37449	1.44381	1.45393	2.7605	2.5835	1.5923	1.17176	0.615581	1.88049	2.68225	0.726979	3.19365	3.19099	2.81254	0.219368	1.00511	0.965563	1.18235	0.915657	1.39025	0.436181	1.5691	1.51643	1.57563	1.17792	1.43653	1.6875	1.7084	3.57781	3.06612	2.70007	0.40635	2.28072	0.722062	2.11961	0.921596	1.53734	0.758354	1.7392	1.14675	1.38388	0.580791	1.3696	1.56089
ANKMY2	7.9188	8.52565	8.5318	7.90048	8.56356	8.43487	8.19668	8.70389	8.26583	8.72282	8.73906	8.35371	8.59423	7.99845	7.78521	8.47653	8.70389	8.71864	8.63152	8.53551	8.61708	7.95863	8.15855	8.4721	8.32524	8.47986	8.71613	8.07741	7.65041	8.76564	7.9711	8.43722	9.11102	8.85774	9.05216	8.93866	8.73357	8.6437	8.58028	8.61975	8.91286	8.56853	8.97217	8.61975	8.60829	8.48109	8.82057	8.60963	7.8289
ANKRA2	7.53406	7.57059	7.01164	7.26444	7.0047	6.74847	6.79554	6.89376	6.69341	7.19469	7.10463	7.05952	7.23481	7.10755	6.75919	7.34655	7.37826	7.15708	6.81494	7.41893	6.67555	6.7279	6.68077	7.35696	6.2131	6.89258	7.74603	6.77698	6.36029	7.03149	6.69299	6.97736	7.01672	7.35852	7.11872	7.32429	7.56997	7.29091	7.67762	7.44827	7.68959	7.29639	7.67044	7.40116	7.04721	7.37896	6.80648	7.71914	7.1417
ANKRD1	7.79642	9.84769	8.42745	8.66349	8.86935	8.61081	9.5945	9.08874	6.91335	9.12538	8.73357	9.0399	8.71475	9.19222	9.85077	9.29011	8.84996	7.55636	7.12126	8.79908	8.78248	8.67757	8.80341	8.97798	10.0994	9.04161	8.78385	9.43593	9.66883	9.63141	9.96164	8.28432	8.79138	8.49787	9.62318	10.7784	8.63772	9.06157	8.67371	8.71733	10.0608	10.0449	9.54815	10.8592	10.0002	10.3238	9.81359	9.40834	9.47994
ANKRD10	6.09772	6.3248	5.69002	6.19306	6.10955	5.86439	6.44297	6.19877	6.44179	6.3652	6.11857	6.05526	5.85229	6.28604	6.35993	6.54419	6.42895	6.20646	6.54385	6.12259	6.03209	6.32595	6.33736	6.14979	6.3233	5.93271	6.24571	6.22138	6.15974	5.93591	6.48059	5.87785	6.21992	6.06592	5.67415	6.30527	5.62151	5.99289	5.83975	6.10596	5.75673	6.06263	5.70797	6.10993	5.91579	6.1516	6.8056	5.93814	5.964
ANKRD11	5.86144	5.41285	5.54985	5.7785	5.54608	5.52539	5.51659	5.27932	5.40517	5.56499	5.15821	5.4751	5.27932	5.72736	6.15307	5.56283	5.57229	5.43537	5.61506	5.25359	5.58598	5.37347	5.97055	5.36524	5.82833	5.03311	5.43613	5.95232	5.60193	5.63654	5.40662	5.27419	5.26581	5.28858	5.29011	5.21603	4.99757	4.99072	5.37957	5.24851	5.43537	5.24896	5.14882	5.09152	5.51966	5.20929	5.64963	4.98706	4.78824
ANKRD12	6.11818	6.34077	5.91363	5.99414	6.09957	5.96919	6.70429	6.31283	6.3343	6.21677	5.20218	5.77053	6.32519	6.41576	6.40082	5.79146	6.04391	5.69309	5.51786	5.81476	6.18034	5.74876	6.19341	5.85843	6.01172	5.59585	5.92249	6.17102	6.05565	5.99324	6.29893	6.23437	6.97522	6.39734	5.8658	6.11025	6.06374	5.83937	6.56508	5.50726	5.84767	5.9128	6.15265	6.13397	6.02985	5.93665	5.63547	6.32595	6.37173
ANKRD13A	6.70347	7.1987	7.08434	6.30193	6.98151	7.08094	7.15854	7.26992	6.51436	6.89956	7.21429	6.4282	6.93289	7.04434	7.29036	8.05675	6.48657	6.64369	6.41506	6.82232	6.4821	6.8811	6.7309	6.71481	6.52905	6.32979	6.34077	6.65445	7.12805	6.32703	7.57125	6.35533	6.43159	6.43924	6.21479	6.37538	6.3248	5.9828	6.48925	6.46913	6.32125	6.01871	6.52586	6.20249	6.19701	6.21792	6.65043	5.99256	7.08936
ANKRD13B	5.11843	4.44536	4.72755	4.66314	4.68728	5.25632	4.31391	4.12464	4.31684	4.65231	4.69671	4.99365	4.67336	4.35495	5.17968	4.92736	4.85895	4.92577	4.23193	4.18866	3.70632	4.75873	5.70366	4.90192	4.27091	4.96494	5.18078	5.05735	5.32565	5.10083	4.82163	5.04993	4.7569	4.53383	4.60113	5.02829	5.0682	5.44261	4.6511	4.90887	4.67249	5.03356	4.16242	4.92813	4.47418	5.08003	5.52363	4.21745	5.00643
ANKRD13C	5.72147	5.19542	5.44154	5.38762	5.46386	5.29048	5.4224	5.17067	5.39288	5.40302	5.2616	5.53598	5.64566	5.34673	5.65271	5.20817	5.60696	5.20258	4.88849	5.1073	5.35347	5.10235	5.05693	5.44809	5.11136	4.96291	5.09467	5.69111	5.12107	5.12419	5.40483	5.33863	5.11016	5.44393	4.82078	5.46082	5.55476	5.77676	5.08364	5.49278	5.36707	5.45155	5.20329	5.51697	4.86288	5.56776	5.03643	5.07441	5.58015
ANKRD13D	3.08407	4.15108	4.05179	3.75463	3.85979	3.60387	3.70265	3.71901	4.04982	3.5927	4.21845	4.06734	4.35588	4.29915	4.55504	3.91277	3.90988	3.92499	4.22977	4.45325	4.35103	4.67382	3.3958	3.94412	3.8457	4.02427	3.59619	4.28907	3.96652	4.49101	4.20661	4.13335	4.64238	3.67613	4.15064	4.20122	4.31818	4.02647	4.45594	4.62042	4.60361	4.01254	3.226	3.81403	4.40393	4.24105	4.75495	4.58826	4.19673
ANKRD16	1.95974	1.89439	1.99498	2.03402	1.9244	1.92031	1.92277	1.94491	0.86671	0.825577	1.36853	1.74622	1.05843	2.11213	0.996947	1.26576	0.964951	1.36399	1.59291	1.61983	1.27685	1.69837	1.2984	1.19698	0.944506	1.62328	1.3964	1.24279	1.56505	0.983295	0.996947	1.39756	2.32687	1.90493	1.45919	1.75974	1.56611	1.54122	1.78977	1.4686	1.46694	1.30729	2.3489	1.26634	1.96052	1.64865	1.88856	1.74033	1.00856
ANKRD17	7.22768	7.0659	6.919	7.26742	7.37178	7.23323	7.14417	7.3406	7.35852	6.67883	6.888	6.78673	7.47585	7.12805	7.03769	6.50847	7.04815	7.09739	6.72077	6.82779	7.00561	7.05667	7.07304	6.97139	6.95629	6.82606	7.40462	7.56934	7.04336	7.17503	7.61927	7.43392	7.55356	7.13955	7.08094	7.19982	7.51628	7.40462	8.05913	7.10518	7.68012	7.24644	7.26694	7.37604	7.65447	7.29983	7.66274	7.29927	6.69554
ANKRD18A	2.72495	3.75744	3.68155	2.61163	2.68225	2.71846	1.51907	2.68495	1.50021	3.09335	0.0400888	1.58662	1.87071	1.63611	3.74481	1.02048	2.81417	1.94574	3.0167	1.8374	-0.169719	2.61803	0.69137	0.215338	1.05407	0.737292	4.22109	1.26278	1.28673	3.01276	2.65314	4.1597	2.38249	2.1789	1.35203	1.35149	2.13337	1.86916	1.50977	3.16927	1.58662	1.48994	1.57402	2.98715	0.893434	2.29283	1.20734	3.05293	0.501419
ANKRD18B	4.90506	1.33198	3.6157	4.26963	3.05026	0.820752	2.48762	2.17134	0.985409	1.92845	1.76394	1.57138	3.27573	1.06896	0.211608	2.61974	-0.740993	3.57687	3.0321	3.66044	3.50402	3.14066	3.2015	2.99203	3.5474	0.996947	4.816	1.12302	1.89	4.10133	3.00224	3.63608	3.13746	3.20767	-0.316675	3.06932	0.033705	3.72985	3.41291	2.87852	1.16598	4.19196	2.5894	1.36227	3.85331	3.21103	1.85472	5.59445	2.74741
ANKRD19P	1.06206	1.03287	1.11369	1.11614	2.33295	1.08688	1.07501	1.10045	-0.183949	1.25831	-0.0333132	1.45446	1.07623	1.2068	0.449292	1.21479	1.0645	0.151978	1.96586	0.616911	1.791	1.08127	0.135385	3.35223	0.191211	0.797123	1.34061	1.24384	0.964235	2.05707	1.54184	1.90409	0.368559	0.284988	0.160169	1.1365	1.01333	0.199111	2.89932	3.00796	2.44717	0.896426	1.54868	0.580791	1.74442	0.23674	0.0318453	1.00041	1.09433
ANKRD2	8.86072	8.5269	7.26992	5.76837	8.91602	9.51625	7.26992	9.1312	7.28146	9.1312	7.00183	10.0218	5.14654	9.30704	8.30887	9.5871	6.66826	8.07568	7.13405	10.1442	7.54047	9.038	7.85444	7.17007	6.68195	9.85705	7.97182	6.9622	10.03	7.42288	8.78824	8.64761	5.38574	5.47472	8.38777	7.59884	9.57704	8.41467	8.88166	7.04479	9.06727	8.59535	6.62501	8.41576	9.52135	9.7419	6.56422	9.26759	5.23262
ANKRD20A5P	2.91201	3.36254	3.04764	3.85628	2.51403	2.05107	3.43822	0.355729	3.21732	3.51586	1.20385	1.044	2.07645	1.51094	4.27962	1.19043	1.68868	2.92251	1.72865	3.29433	3.04021	4.15017	0.748492	0.812714	1.89202	0.147238	3.84474	1.63786	1.82849	3.87164	1.64561	3.02726	2.95321	1.07623	1.55243	2.29157	4.49101	1.09488	3.0816	3.92069	2.0907	2.74919	1.7392	4.47038	4.1663	1.00183	1.90409	2.01033	1.30637
ANKRD22	4.53947	3.0947	4.42554	4.53033	3.89466	3.4089	-1.31744	2.06881	3.19589	3.95433	3.80271	3.8097	5.81259	4.19718	3.57625	5.22409	3.86515	3.41167	2.69724	3.76798	4.414	3.09143	4.10492	3.13683	4.4431	3.41055	2.98016	3.01276	3.75045	3.0947	3.13367	3.07833	4.66448	3.08808	3.99353	4.46258	3.36717	3.95939	6.29422	6.13579	3.62644	4.20036	4.19499	3.31636	3.3614	2.68871	2.89641	4.39209	6.75631
ANKRD23	7.56454	5.95783	6.72617	5.76875	4.23877	5.79425	5.54055	5.59514	3.90238	6.49972	5.82801	2.5904	3.99012	6.1397	6.87479	5.35528	3.48486	4.67759	5.15336	4.40889	4.20845	5.37596	5.00277	3.8227	4.64904	7.9448	5.46117	4.42462	6.27495	7.03385	5.70622	5.56283	5.12962	5.4787	5.83504	6.54587	7.936	8.28998	5.30798	5.07928	5.64678	3.76844	5.64146	3.51837	5.13954	4.65652	5.26233	5.91129	3.88669
ANKRD24	1.54063	1.50563	1.58889	1.59001	1.53787	3.59216	1.53672	1.54918	3.02658	1.90493	1.38449	1.65661	1.3696	3.99642	2.12893	1.31669	0.0755663	2.7605	0.910741	3.16417	1.68167	2.61163	0.505083	2.68495	2.99893	1.11257	1.76035	2.59422	3.2416	2.17023	1.48146	3.10916	0.22318	1.81451	1.86332	3.0321	1.52352	1.67755	2.15345	1.632	1.59824	1.26455	2.92767	0.182751	2.27558	1.56765	1.6286	1.36175	1.02955
ANKRD26	4.82889	4.93153	4.87251	5.10656	4.92501	4.99994	4.91332	4.82525	4.01641	4.15156	4.55989	4.65066	4.67208	4.28082	2.7572	5.09589	4.31432	5.03107	5.0188	4.16799	4.45325	5.04326	4.97701	4.45729	3.48315	4.86791	5.25126	4.5789	3.63077	4.95339	4.55588	5.81682	4.64361	4.77868	4.64574	4.18209	4.68975	5.45155	4.85436	4.58062	4.6662	4.94546	4.94674	4.76339	5.30537	4.87901	4.29605	4.96953	4.53296
ANKRD27	7.43737	7.3638	7.23642	7.68351	7.47533	7.26138	6.91541	6.72443	7.07412	6.93414	7.03625	7.35752	7.21798	7.30618	7.32474	7.20521	7.34115	7.10034	6.57353	7.14061	7.73378	7.34879	7.47141	7.25444	7.31473	6.60128	6.96042	7.26795	7.53047	7.39081	7.27835	7.19324	7.12318	7.3638	7.09318	7.31729	6.90689	7.01344	7.35204	7.25007	6.86293	6.96132	7.59648	7.24379	7.269	7.25662	7.15462	7.32529	7.77678
ANKRD28	6.67143	6.61485	6.43405	6.33247	6.45872	6.38173	6.73306	6.75381	6.8128	6.72525	6.17395	6.56508	6.55186	6.66274	6.42934	6.6449	6.22138	6.36372	5.58598	6.31248	5.86259	6.5679	6.22026	6.49692	5.87744	6.16918	6.17649	6.41845	6.30636	6.02053	6.5246	6.86877	6.25528	5.86474	6.5315	6.07579	6.3397	6.02157	6.61559	6.16016	6.4465	6.03094	6.30862	6.36068	6.59219	6.4028	5.66785	6.27844	6.27056
ANKRD29	5.45796	6.09363	5.37634	5.65943	5.53489	5.07649	5.34821	5.70622	4.59911	4.98787	5.84873	6.14427	5.90881	4.8285	4.82078	5.12694	5.4207	5.68716	5.32453	5.98496	6.21201	5.37156	4.96749	5.36234	5.03977	5.53234	6.36782	5.34524	4.98456	5.2119	4.82078	5.79185	6.73592	5.74738	6.20172	5.9285	6.1575	6.03422	5.77494	5.65873	6.20096	5.75152	5.74033	5.87067	5.35127	5.41882	5.7804	6.05136	5.53709
ANKRD30A	0.380463	0.302469	0.416735	3.51298	3.0771	3.12632	3.16612	3.3985	1.67525	1.57669	3.21732	2.78716	1.71957	2.79371	3.87893	3.90896	3.08594	0.332751	4.05364	0.308413	4.4889	0.633874	1.70717	3.59477	1.23326	3.75558	2.85941	1.56446	1.71615	2.3489	1.62676	1.52352	1.09754	3.70679	3.96833	0.945181	4.12954	3.0497	1.62922	3.29865	1.59947	1.044	1.83389	0.637629	0.854376	1.0269	2.25757	2.22519	2.3395
ANKRD30B	1.63954	0.53291	1.8554	1.92743	1.95111	3.06103	0.638976	0.678232	1.03612	0.53291	0.69137	0.844181	1.28953	0.111191	2.24063	1.73093	1.38738	-0.0730405	3.97458	0.247588	2.95882	0.0773448	1.08871	1.33546	1.84798	1.50876	0.438086	0.51292	1.54756	0.852895	1.65661	1.20435	1.95612	2.0114	1.2967	0.125476	1.37081	1.61759	1.13375	1.58528	-0.0691528	1.01988	0.616911	1.54655	0.587585	0.792133	1.20435	1.1841	1.19698
ANKRD31	0.944506	0.990852	0.98804	0.982622	0.935785	1.19636	0.948777	0.983295	-0.126665	0.521237	1.13484	0.151978	-0.162529	0.27199	0.901515	1.11558	1.76578	0.501419	0.6302	1.29169	1.99885	1.50281	0.380463	0.507015	0.829916	1.31896	0.279257	0.274116	0.383943	0.566938	1.17893	0.583443	0.907022	0.534869	0.874403	0.465876	1.04199	0.339294	0.672696	0.221417	0.230684	0.27199	0.28029	0.834851	0.721066	0.626304	0.155097	0.141275	1.24832
ANKRD33	0.614465	0.514913	4.16344	3.68291	0.590541	3.11693	3.88518	0.646399	4.91833	3.87841	2.84502	2.97952	2.84502	3.34554	3.96371	0.146087	3.86758	4.24462	1.79589	3.29493	1.94409	4.11314	3.47219	3.68347	3.19893	2.14988	3.64612	3.97995	3.86515	3.98382	3.97402	4.2474	3.59783	3.16228	2.81813	2.9098	3.5349	0.0808639	3.56356	0.383943	1.24384	4.29692	3.4411	3.55675	2.68495	4.48844	2.8516	2.84193	2.82952
ANKRD33B	1.34441	5.49194	1.40033	1.39137	5.78562	5.21353	1.34441	1.35754	4.52018	4.59911	3.90845	3.66984	3.67337	3.77154	1.13305	4.94635	1.07316	3.33844	0.115437	3.95664	1.40033	3.91974	1.54355	4.77255	4.67644	4.13808	5.79048	3.30747	0.972801	3.28396	1.20495	4.9501	5.19161	5.58262	5.61831	5.24784	4.51846	5.71863	6.32745	3.31576	5.92322	5.6299	5.84625	3.87012	2.04155	0.201484	5.09217	2.9016	0.724086
ANKRD34A	1.61247	1.57834	1.66619	1.66677	1.6078	1.61473	1.61187	1.61928	1.14262	0.151978	0.4892	0.734406	0.910741	2.43791	1.56611	0.868853	1.23274	1.77335	1.80393	1.6078	0.730781	1.85607	0.973545	1.3094	1.32784	1.66494	1.31453	0.968184	2.18643	2.2645	0.969535	1.74033	1.653	0.377282	1.74201	0.196141	1.72689	0.528014	1.40769	0.268003	1.02436	1.39756	1.17575	1.21592	1.91043	0.947346	0.626304	0.172487	1.2911
ANKRD34C	5.53272	4.81467	4.69714	-0.302448	3.67958	2.96496	3.15126	2.02564	5.05773	2.5229	3.29805	3.16295	4.14928	4.36896	3.88233	4.63934	3.39163	3.33392	4.24291	4.44175	4.44847	4.34927	2.18643	5.61213	4.66576	4.20483	5.55063	3.54115	3.53651	3.74685	4.89483	3.27022	4.76504	3.45062	4.74791	1.71838	1.55085	3.30801	4.6798	5.4674	1.18764	0.77457	3.50799	4.32603	4.4387	4.09819	3.67223	4.5673	3.94947
ANKRD35	5.10912	3.97896	4.38892	5.04605	4.38854	4.18121	1.2355	4.72339	4.06303	4.50074	4.60487	3.76798	4.47758	4.72172	4.91579	5.01585	5.59659	4.15206	5.20524	4.85565	4.63387	5.21828	3.56054	4.53947	5.17619	4.34167	3.63216	3.8468	4.76921	4.8667	5.43755	3.85033	4.46991	4.10998	4.79595	4.15017	4.51802	4.65652	3.93508	4.4383	1.99308	2.36004	4.46435	1.63786	5.24675	4.40715	5.53163	5.09589	4.82412
ANKRD36	4.46306	4.21802	3.87693	5.25126	4.2658	2.99045	3.80681	3.39286	3.38195	4.64196	4.3833	3.75692	3.73914	4.4112	3.14687	4.38151	4.04018	4.03451	5.0856	4.55029	4.48295	4.36722	1.80985	4.89402	4.04982	3.47644	5.00519	4.35495	4.3058	4.61918	4.02338	4.27412	5.21469	4.61961	4.33721	4.47236	5.14882	4.88604	5.17025	4.35359	4.5437	4.84028	5.14378	4.32927	4.92813	4.19582	6.28981	4.69532	5.06981
ANKRD36B	3.89137	5.31158	3.95991	4.29517	3.91277	4.37755	4.42913	3.61623	2.61517	4.24829	4.13639	3.64371	2.81094	3.69706	3.67278	3.46498	4.1004	3.54849	3.3257	3.93508	3.79541	3.62532	3.5943	3.70996	3.41722	2.66846	4.66662	3.5349	3.70423	4.27494	3.30801	3.6588	5.69518	4.09049	3.42817	4.12101	5.1895	3.51527	5.93271	4.41754	5.27281	3.82066	5.23191	3.93196	4.90583	3.67903	5.82902	4.22829	5.17389
ANKRD36BP2	3.01422	2.87775	1.84932	3.85277	3.04696	3.20317	3.30631	3.43172	1.0484	3.24416	2.14889	1.55243	1.0186	3.64371	1.98501	3.73707	3.65531	2.99117	1.46362	3.79074	0.897093	3.80822	1.56148	4.13537	3.233	1.16371	3.45684	2.0209	1.81768	2.55175	1.48473	2.41768	3.42935	4.36348	3.85531	3.36669	2.95089	1.21111	1.98763	3.19719	1.08439	3.25728	3.53706	2.31713	4.26755	2.60577	5.53093	3.27573	4.2507
ANKRD37	7.92634	6.82363	7.60721	8	7.36026	6.82996	6.83208	6.83753	5.85943	7.00927	6.6239	6.54182	5.97374	6.70021	6.77113	6.12989	6.62351	7.18319	7.23221	7.48823	8.25894	7.72672	7.59884	6.69594	7.36899	6.39366	5.93094	7.6569	7.47259	6.888	7.95624	6.81026	6.77649	6.50535	6.4818	6.0428	6.18723	6.30154	6.57516	6.80206	6.2047	5.73246	6.59058	6.19634	7.27519	7.10939	6.78038	6.52665	6.89911
ANKRD39	5.50538	5.40553	5.31334	5.97772	5.29308	6.21714	5.95459	6.01392	6.36631	6.38253	5.96774	6.17506	5.52539	6.47357	5.7804	6.67841	6.29501	6.22597	5.70546	6.03981	6.27617	6.20314	5.61041	6.23515	4.59543	6.10495	6.2441	5.45612	5.97161	6.39089	6.09009	6.76088	6.1628	5.85305	6.71178	6.25028	6.07028	5.97481	6.45131	5.09703	6.15307	5.34673	6.09399	5.93455	5.92813	5.65271	6.13071	5.83545	5.2434
ANKRD40	7.17305	7.03816	6.71178	7.2413	7.35972	7.41846	7.48218	7.6092	6.89785	7.12556	6.43083	6.60364	7.09362	6.77071	6.78466	7.16664	6.87708	7.25288	6.40357	6.98804	6.86917	7.66851	7.52069	7.39192	6.80648	6.77953	6.7047	7.50391	7.18151	7.02713	7.18711	7.11369	6.63534	6.63243	6.63651	6.68917	7.13544	6.95498	7.19619	6.74352	6.78714	6.82911	6.65778	6.84617	7.04291	7.09127	7.81771	6.49494	6.88458
ANKRD42	3.61305	4.17196	3.09539	3.39105	3.64564	4.27808	3.23418	3.50627	0.900098	1.69719	4.25174	2.47291	3.7938	3.21795	3.58764	2.94004	3.17051	4.07284	3.11951	1.41579	2.27952	2.73721	2.95321	4.20618	3.37575	3.35342	4.0776	3.76998	3.16557	4.60778	2.07727	3.47435	4.48421	3.8097	3.52163	3.22415	3.39517	3.90845	3.66728	3.36254	4.27278	1.72452	3.92262	0.138533	3.93053	3.88669	2.32808	4.32827	4.21027
ANKRD44	4.93512	4.8192	2.99745	4.49528	4.06111	4.43955	5.30601	4.52719	4.26839	3.98956	4.8038	4.69441	4.65936	4.06452	4.9501	3.56891	3.72005	3.88282	4.45772	4.47375	4.02945	4.18673	3.52266	4.09948	3.98664	4.1877	4.23841	3.96135	4.09049	4.23102	4.32071	4.20935	5.03519	4.68015	4.17865	4.87446	4.99876	4.76839	4.96988	5.21828	4.49013	4.53823	4.8114	4.72969	4.44891	4.19499	4.19625	4.55765	6.25895
ANKRD45	0.923149	0.871311	2.62754	0.958962	2.15112	0.935171	3.50627	0.963648	1.09488	0.44734	1.58943	0.411293	1.57084	2.01999	1.80008	0.833224	3.15394	1.80531	3.67748	1.89145	2.95546	1.08999	2.34076	1.4555	0.986649	0.0788589	1.29229	2.16913	2.12646	1.93328	2.4809	2.74232	1.90797	1.45231	0.698704	0.113813	-0.10059	2.61245	-0.999504	-0.25868	2.18288	1.9001	2.54597	0.00588198	1.08067	1.45342	0.258062	0.723139	1.7506
ANKRD46	8.25697	8.43832	8.38389	7.90258	8.27794	7.90387	8.12957	8.1322	7.9188	7.98592	8.36725	8.03837	8.52565	7.83843	7.6917	7.80188	7.95863	7.88197	7.88846	7.97947	7.94775	8.00158	7.74329	8.19059	7.41786	8.03506	8.16553	7.71164	7.70248	8.11782	7.64428	7.81141	8.32022	8.44932	8.46601	8.45231	8.37225	8.33001	8.15068	8.29477	8.39207	8.32232	8.27229	8.25306	8.35165	8.35723	7.34164	8.44177	7.85155
ANKRD49	5.82157	5.80879	6.18903	6.00153	6.10242	6.00053	5.81818	5.91678	5.65838	6.24646	6.34454	6.39589	6.1571	6.69554	6.42858	6.37771	5.85229	5.94689	6.17721	6.3135	6.4206	6.27535	6.29019	6.10739	5.84806	5.94398	5.66369	6.18723	6.03522	6.24822	5.92598	5.66264	6.28981	5.63734	6.28334	6.20903	6.40357	6.09214	6.10955	6.05973	6.47081	6.08245	6.11517	5.60414	6.42487	5.80178	6.09469	6.44383	6.41722
ANKRD50	5.14419	6.16129	5.05935	5.40483	5.10947	5.50159	5.45227	5.86741	5.25166	4.9492	5.60008	5.82833	5.09428	6.05423	5.78346	6.45314	6.12125	4.77952	5.43937	5.4806	5.86297	5.44661	5.49466	5.78733	5.34971	5.4121	5.91857	5.45513	5.29836	5.61287	5.04605	6.19381	5.89957	5.46463	5.62003	5.93271	5.80782	5.55964	5.16636	5.33754	6.12766	5.35271	5.58636	5.52756	5.84231	4.83415	6.22597	5.95783	5.61654
ANKRD52	4.78443	1.99605	2.10324	2.1597	5.77016	4.98618	2.03301	6.35303	3.88233	2.58054	4.00741	3.47943	4.92736	3.22415	4.31566	2.05404	1.41316	3.18673	2.71513	4.35634	-0.999504	4.70897	4.09994	4.17485	1.45023	3.67958	2.96878	3.69004	4.13639	3.71796	3.39227	3.79586	3.08041	4.51668	3.92764	4.03502	4.10133	3.8246	3.15001	3.49664	1.86916	4.60194	3.16295	4.37128	4.31684	4.67171	3.35461	4.06111	2.04589
ANKRD53	0.941312	2.6726	0.984015	2.5064	0.930256	3.75648	3.47588	4.14973	3.71419	4.69181	3.44959	2.05315	3.82655	4.79672	3.5839	2.55572	4.27182	4.22931	1.10744	4.11798	4.12101	0.0400888	4.56906	3.80822	3.80924	3.72353	4.31946	2.74481	3.58477	3.41722	4.1597	3.68246	3.81356	1.63901	2.51189	3.2579	3.28779	3.47697	4.6106	1.52912	2.88583	2.38361	4.46907	1.64203	3.98956	4.77952	5.29342	2.82301	2.30247
ANKRD54	4.86064	1.18875	1.27364	2.29756	4.71495	4.49101	3.73082	1.24887	4.01352	4.37318	5.4678	4.72589	4.39435	3.3389	3.43108	4.18346	4.05685	3.26332	3.61084	3.3372	3.51892	3.9286	5.46082	4.37582	4.81183	4.73452	4.49058	5.35127	4.53685	3.80044	4.72086	4.87363	3.11951	3.92312	3.82804	5.25432	4.05227	4.23841	3.01276	4.448	4.0002	4.89995	4.06734	5.12924	4.56074	4.51214	3.86276	4.32416	1.94491
ANKRD55	4.26316	3.67748	3.92216	4.60448	3.48672	3.67903	2.79122	3.83445	4.54502	5.00195	4.98787	4.83905	4.45325	3.77667	1.9152	4.65269	5.38685	4.6217	3.06419	3.97804	4.31987	4.5712	5.05643	4.58948	4.85215	4.42647	4.32927	3.92812	4.06922	4.2279	4.11224	3.89949	4.58948	4.96247	2.85381	4.83654	4.40617	4.71917	5.01392	5.76081	4.47954	3.69208	4.30883	5.0488	4.49574	5.25432	3.79178	4.03031	4.40889
ANKRD6	6.04836	6.83083	6.82492	6.81724	6.20646	6.57972	6.7376	6.23437	6.063	6.7791	6.05705	6.80439	5.79078	6.25528	4.96622	6.5679	6.35175	6.6409	6.6449	6.21792	6.23185	5.84161	5.94689	6.17895	5.39573	5.9182	6.45047	6.14463	5.75371	6.91541	5.99221	5.97161	6.80439	6.7056	6.5081	6.14758	6.47037	5.9422	6.07546	5.90615	6.33549	6.11898	6.43724	6.33177	6.14577	5.97098	6.25306	5.95528	5.72842
ANKRD7	3.98228	2.70684	2.91046	2.43073	0.426602	2.0582	0.767346	2.15721	2.21516	3.71529	2.68586	2.11868	2.06439	2.92916	5.10544	-0.25868	4.00741	2.86157	3.67132	1.93095	2.79047	0.137666	1.25218	2.77753	0.528014	2.79681	2.62567	2.79758	4.33937	4.94339	1.92356	1.78396	2.98914	2.29634	1.45852	1.64261	1.69321	3.14875	2.73121	2.32328	3.105	2.99473	1.81894	2.92105	3.49225	1.99984	1.80141	2.20337	3.21223
ANKRD9	8.61708	8.54774	8.94028	8.85774	8.81185	8.38296	8.50211	8.11287	8.93691	9.2834	8.28244	8.21373	8.44049	8.76167	8.72143	8.68813	8.16626	8.92049	8.65047	9.21178	8.48844	9.12192	8.1995	8.71202	8.47011	9.11502	8.65561	8.67881	9.18421	8.48329	8.66709	8.47439	7.96019	8.26003	8.41985	8.33309	8.07066	8.52009	8.31583	7.9913	8.38582	8.33703	8.78385	8.70918	8.58028	8.79423	8.64915	8.35912	7.76666
ANKS1A	7.6311	7.54443	6.99445	7.37398	7.67698	7.04242	7.42458	7.21216	8.07649	7.14212	7.29321	7.28773	7.58049	6.91002	7.08789	7.13348	7.09224	7.37235	7.38253	7.21429	6.75919	7.79031	7.52935	7.19982	6.5164	7.02108	7.49478	7.47698	7.16806	7.53162	7.66781	7.77465	8.04454	7.70454	7.32529	7.06831	7.57419	7.56099	7.86082	7.62671	7.27346	7.34706	7.91575	7.46139	7.25826	7.42682	7.88915	7.35852	7.55162
ANKS1B	1.16192	2.99619	1.22266	1.21592	1.16828	2.59624	1.18124	2.14889	0.859051	0.155097	1.40285	1.79955	1.42651	0.644034	-0.222289	1.0426	1.57197	1.47742	1.71367	1.49803	2.27063	1.10626	1.62328	1.3558	0.958962	1.11778	1.75786	1.17792	1.33384	1.00856	1.81584	0.913584	3.06932	3.41669	1.55975	2.35695	1.14799	0.613202	1.73799	1.51803	1.53672	3.12253	1.68392	1.62053	1.52741	0.940008	1.8834	3.04422	0.392025
ANKS3	5.06344	4.71071	4.66268	5.21867	4.93153	3.69208	4.31818	4.22749	4.54124	4.69575	4.47913	5.07928	4.39677	4.77081	5.17849	4.56906	4.45686	5.26833	4.3058	4.56774	4.62771	3.85979	4.91293	4.11516	4.1981	4.25269	4.04347	4.73735	5.03149	4.72589	4.93512	4.42249	4.93153	4.66879	5.0726	4.10088	4.98331	4.04251	4.12629	4.34836	4.48501	5.04092	4.77129	4.43183	4.83208	2.82802	5.50013	4.04018	4.03748
ANKS4B	1.27016	1.30369	2.44394	1.32315	3.34995	1.27421	1.28047	1.29439	0.957005	0.999573	1.19636	1.2472	1.23326	0.856648	0.861924	1.4789	1.63097	0.950671	2.37146	1.11888	0.826482	0.510701	0.981917	0.895572	2.91421	1.49692	0.913584	0.87669	1.09694	1.19043	0.914842	0.864366	1.82391	0.526507	0.901515	0.426602	1.99984	0.818033	1.06756	0.922354	0.368559	0.995546	2.85099	0.809559	3.29493	0.611921	-0.602941	1.28268	1.10569
ANKS6	2.36449	2.68791	3.16866	3.05293	1.76268	4.24332	2.57569	2.39866	3.88621	2.19672	3.45402	4.09904	3.92903	3.55442	3.02351	4.39338	4.46863	3.43885	1.83814	3.90605	2.5904	3.15984	2.76314	3.39163	3.53432	2.18148	3.35405	3.77362	3.28396	3.64417	3.48611	3.84524	3.9814	3.62097	4.56774	3.21422	3.76293	1.92514	3.1163	2.78968	3.15126	3.80044	2.93445	2.07437	2.90907	2.33295	4.06822	3.49225	3.6157
ANKZF1	0.854376	5.17506	3.20664	0.886128	4.29692	5.19266	0.86356	5.4912	1.17234	3.40394	4.05405	3.9342	3.22241	5.20715	2.01905	0.737292	1.78589	3.63077	1.19213	3.41448	4.30259	1.28451	4.92848	3.76442	5.24177	3.57115	4.16053	4.98291	1.93002	4.52018	3.49328	4.9746	4.83208	3.65933	5.19542	5.16214	4.51336	5.78382	5.32492	5.76982	3.55442	5.24637	1.50071	4.63515	4.99796	4.40889	5.51152	4.32786	3.76645
ANLN	3.43446	2.90839	2.80931	1.47988	3.31278	2.64922	3.86421	2.97895	2.98216	3.39343	3.14566	3.35674	3.87942	2.79845	3.83927	5.82296	4.51336	4.44927	2.37257	3.41109	3.34995	3.68552	5.05607	2.30362	5.43973	3.65694	5.38464	3.28889	3.38425	6.79073	4.11558	3.84841	3.31398	3.58955	3.46075	4.0923	3.40232	2.6647	1.96764	3.48892	3.34671	3.83445	3.27688	3.67337	3.51586	1.27926	7.41567	3.09143	3.58808
ANO1	1.39137	4.40211	4.39863	4.14757	4.08905	3.62644	4.79917	4.71917	3.53706	4.1877	5.0044	4.00252	2.32933	1.08756	3.34183	3.49664	4.28204	3.68696	2.66015	3.13483	4.67084	3.00992	4.92963	4.44491	4.11088	3.98956	3.05293	4.01026	3.96833	3.98573	4.78443	4.42913	5.57843	5.76875	4.14448	5.13071	4.29774	4.63763	3.53902	4.43135	2.80109	4.38638	3.89424	4.73772	4.46076	4.80531	4.82032	4.34302	3.42272
ANO10	6.1643	5.46235	5.74519	5.85943	6.36407	5.87619	5.63054	5.9182	5.34708	6.03848	6.31212	6.50016	5.76426	5.63693	5.57196	6.08245	5.88218	6.17649	4.85345	6.36702	6.18867	5.92012	5.96438	6.63576	6.37501	6.24369	5.57161	6.20868	6.29275	6.02265	5.89194	5.87646	6.13331	5.40335	6.46466	5.96365	6.43774	5.85683	6.03884	5.84731	6.41767	5.63547	6.24535	6.16016	6.25895	6.51119	5.73031	6.06154	6.95032
ANO2	1.98251	1.91043	2.01417	2.06126	1.94674	1.94574	1.93987	1.97049	0.148448	0.475948	1.53611	0.886933	0.311782	1.61298	1.45071	2.46951	1.11491	1.5918	2.01999	3.06612	0.302469	2.13444	1.93682	1.96402	0.111191	1.55532	1.11558	2.86157	1.04199	0.663048	1.89678	3.23679	1.78589	1.62328	1.3	2.14889	1.02243	1.56866	1.65238	1.80393	2.87247	1.22023	1.77905	1.73218	2.55283	1.48941	2.31222	1.44325	1.32256
ANO3	0.732664	2.40113	3.21605	0.763619	3.39227	0.757439	1.46422	0.767346	1.08376	0.627559	0.737292	1.75786	1.53734	2.99203	3.76096	-0.0424334	1.63316	1.0504	0.670605	0.148448	2.86021	3.00724	2.45932	0.552976	0.946592	1.41143	2.56387	0.950039	1.04016	1.16247	1.01921	0.943244	0.849098	3.63414	1.48368	0.16796	1.36227	0.599066	0.606317	2.28919	1.06826	3.50091	0.613202	0.308413	0.654809	2.43681	1.18295	1.85751	1.23647
ANO4	3.85277	0.99417	1.07623	2.6868	1.03222	1.80075	1.03742	1.38511	1.14619	1.33597	1.11953	1.28393	1.30369	1.61818	3.39105	0.211608	0.118359	1.17526	1.84932	-0.378733	2.47157	1.8246	2.75964	0.82488	1.071	1.84136	2.43552	1.32256	3.02799	1.64736	1.45071	1.31231	1.26807	1.79955	1.54407	1.59001	1.83873	1.52128	2.20215	2.12425	1.69776	2.00938	1.36227	1.49692	0.0515615	1.14489	0.591996	1.48368	1.09811
ANO5	8.78519	8.94028	8.4286	9.14538	8.68391	7.41281	9.054	8.86935	9.23667	8.29663	8.82057	9.12357	9.22195	7.85581	7.84471	8.12875	9.054	8.96357	9.12917	8.27888	8.4056	8.55379	8.48751	8.86529	8.11782	8.44604	8.98823	8.63645	7.82761	8.55712	8.37328	9.1437	8.58134	8.82336	8.36821	8.84996	8.97798	9.17817	8.8292	8.90501	8.56723	8.90821	8.97402	8.72951	8.20338	8.41684	7.77465	9.00537	8.76992
ANO6	7.84198	8.14973	7.75298	8.02909	8.08236	7.64686	8.16553	7.84794	8.19567	7.3858	7.92835	7.75784	8.14057	7.97723	8.31194	8.28619	7.85019	7.98107	8.21829	8.01898	7.48592	7.4816	7.44827	7.70724	7.9188	7.71673	7.28568	7.6222	7.93686	7.78389	8.38981	7.68351	8.35723	7.79228	7.91728	7.60003	7.83843	7.59581	7.82827	7.28092	7.98422	7.26185	7.91344	7.63999	7.99371	7.65949	7.63372	7.95089	8.21997
ANO7	1.69837	1.65603	1.74686	1.75486	1.68987	1.69206	2.82221	1.70429	0.856648	1.88049	0.491092	1.75302	1.12839	1.7821	1.87154	1.91945	0.724989	1.19213	1.18875	1.14905	3.38022	1.08376	1.28895	2.08701	2.44959	0.973545	1.84268	2.63662	1.76949	2.45675	2.81094	1.71314	1.35471	0.67604	2.21896	1.61519	1.61983	1.80664	1.45987	0.933909	0.918489	1.49692	-0.000785066	0.928802	0.001227	1.75786	2.68955	0.663048	1.06568
ANO8	5.13187	0.989431	4.49146	4.55549	1.02955	4.07375	1.03612	5.02364	4.89879	4.20036	3.66204	3.13872	4.58236	3.57687	4.99438	3.97355	4.95456	4.47457	2.32328	3.35118	0.696546	3.95184	1.78396	4.64904	0.986084	1.6584	4.24022	5.04255	4.34562	5.09508	4.8857	5.10004	3.94608	5.21353	3.36371	3.12074	3.27269	4.46076	4.25447	4.46394	1.39879	4.19984	4.43274	4.31818	3.29126	4.71456	3.77205	3.49053	3.07576
ANO9	4.00118	3.57892	4.09049	2.84656	3.71212	4.32927	3.79074	4.8569	3.87796	3.92545	3.07508	3.69756	3.73303	1.87071	5.58376	2.09371	4.75407	4.42206	3.99498	4.55231	3.14449	3.76202	2.94137	3.42817	2.81649	3.23743	3.55511	2.17371	1.76268	2.80604	2.66107	3.2015	3.28889	2.01417	3.73139	2.05601	2.13444	3.8468	4.23564	2.99814	0.982622	3.87217	4.26963	5.01314	4.62734	4.36306	4.20122	2.51403	3.5911
ANP32A	8.05913	8.31296	7.40346	8.51435	8.50005	8.29193	8.14057	7.97723	7.82324	8.25697	8.50103	7.95943	8.44932	7.63813	7.95624	7.67566	8.2752	7.88496	8.2228	7.81405	8.06334	7.79642	7.87171	8.22963	8.09542	7.82692	8.528	7.96243	7.60582	8.02749	7.52558	7.96871	8.23709	8.58134	8.09879	8.54648	8.1063	8.31194	8.13538	8.40048	8.3098	8.79908	8.07998	8.64761	8.30516	8.38582	8.33899	8.67079	8.16715
ANP32A-IT1	3.95939	0.997618	1.07868	1.08376	1.03742	1.0567	3.29063	1.06756	0.141275	0.150803	0.104279	0.650102	0.146087	0.377282	0.551327	0.52456	3.30575	0.729786	0.0383333	0.374236	0.0400888	0.724989	1.91208	1.435	2.62852	-0.0879038	0.93316	1.99605	1.94574	1.535	2.23422	1.9152	0.870504	1.25781	0.0998539	3.50246	1.82725	0.0277791	3.16557	1.79776	2.8932	0.894138	1.93433	0.733567	0.449292	1.98501	1.4926	-0.302448	3.58433
ANP32B	8.83627	9.17028	8.56853	8.94667	8.9898	8.9065	8.9585	8.54774	8.77555	8.7811	8.53933	8.3098	8.79908	8.44284	8.9585	8.67214	8.89576	8.5318	9.06911	8.51891	8.75913	8.82336	8.70253	8.69621	8.99523	8.34185	8.40769	8.74188	8.71202	8.874	8.40444	8.75913	9.45734	8.67622	8.85468	8.50005	8.86529	8.34982	8.9175	8.67079	9.16489	8.89899	8.99523	8.79138	9.29265	8.54034	9.67194	8.50874	9.04161
ANP32C	1.64561	1.60993	1.69776	1.70012	1.6402	1.64623	1.99805	1.65483	1.32628	1.46694	-0.849845	0.436181	1.10045	1.30155	1.2349	1.64133	2.41768	1.54355	0.144825	1.38801	2.08062	1.11427	3.10431	1.09811	1.46906	0.653697	2.15488	1.90875	2.02994	1.3964	1.65778	2.15112	1.80328	0.759336	0.470086	1.16135	0.739779	0.998892	1.54458	1.03359	1.55696	2.7547	0.361515	1.57456	0.958341	0.881141	1.539	1.76949	1.11724
ANP32D	2.84422	0.28029	3.51837	0.397895	0.352668	2.23073	1.04334	2.94714	1.55645	1.4926	1.12012	2.00854	2.93581	4.57079	1.26049	1.62802	3.72049	4.19582	4.02184	2.36683	3.75999	0.761925	3.19418	3.85628	1.17116	1.71314	3.19954	2.43073	2.1978	1.87296	1.42398	3.69501	3.6157	3.39163	1.19983	1.07552	1.82985	0.848305	1.19698	1.17176	2.66752	0.603507	2.55283	1.0426	3.8169	1.11888	1.19401	4.27494	1.30489
ANP32E	8.05017	7.71528	7.5145	7.72045	7.77207	7.94059	8.21545	7.95624	7.54328	7.67496	7.46733	7.65041	7.69361	7.78521	7.39418	7.86796	7.3638	7.66851	7.40346	7.8508	7.46496	7.61984	7.36141	7.927	7.84732	7.36604	7.71464	7.45187	7.86717	7.30618	7.98743	7.64923	8.32524	7.84198	7.94864	7.79299	7.75024	7.64627	7.59051	7.57536	8.56248	8.194	7.88781	7.63304	7.8508	7.66274	7.76865	8.14557	7.43337
ANPEP	1.40993	1.37917	1.45919	1.4555	1.41797	1.40595	1.40993	4.22109	1.45745	0.459827	3.20019	1.16655	0.894138	1.13426	1.76152	3.45577	3.57946	0.133986	1.57985	0.84748	2.09468	2.62754	1.31838	2.44063	3.17982	1.81768	0.565552	1.30686	1.23647	0.603507	0.669383	0.793942	1.95199	1.5586	1.7096	2.15721	1.89515	2.79931	2.29634	3.21857	1.53126	1.16069	0.133986	0.107014	2.97608	1.90717	1.12646	1.57563	4.22293
ANTXR1	5.8383	5.80141	6.60412	6.12297	6.14795	5.99414	6.61442	5.79225	5.38906	5.82695	6.68357	5.89992	6.11673	6.02224	5.72327	5.97441	5.84941	5.85506	5.9338	6.19769	6.35574	5.82623	5.88466	5.8692	5.94109	5.63054	6.17395	6.32016	6.54675	6.26236	6.34731	5.55902	7.49722	6.51204	6.28251	6.46346	6.94391	6.46305	6.37459	6.60845	6.888	6.69767	6.48571	6.84997	6.86034	6.58411	6.53854	7.03149	6.66274
ANTXR2	6.80991	6.93066	6.30383	6.97228	7.21024	6.75349	6.53269	6.84226	6.5538	6.30784	7.00512	6.90005	7.58538	6.27535	6.02768	6.69381	7.13246	6.81325	7.04864	7.16414	7.27403	6.47724	6.83934	6.49454	6.54587	6.19341	7.21952	6.52539	5.96146	6.50255	6.69179	6.93066	6.98151	6.65281	6.87975	6.99223	6.63127	6.54259	6.77349	6.97967	7.26538	7.53982	7.19827	7.20875	6.87401	6.48416	6.61559	7.23533	7.67302
ANXA1	7.09557	7.32429	7.55095	7.3024	7.77997	7.78389	7.40584	7.65384	7.69815	7.42169	7.8053	7.64562	8.29193	8.10049	8.1322	7.49478	7.85653	7.47259	7.76332	8.07487	8.51775	7.09506	7.52874	7.7489	9.0559	7.98968	6.8802	7.65557	8.38296	7.11318	7.92985	6.5089	8.51661	7.64987	7.21322	7.52498	8.12032	7.79506	7.98028	8.32232	7.34985	7.13745	7.07962	7.31575	7.80726	7.52244	7.93213	7.61175	9.07967
ANXA10	0.682612	2.65623	0.727993	3.53432	0.65833	0.70274	3.7127	0.714912	0.184747	0.757439	1.19276	1.66082	1.7784	1.10626	4.80121	0.722062	0.28029	1.56217	1.56386	1.08639	1.42651	1.09754	0.487369	1.71139	0.192357	3.06864	0.775502	0.641642	0.763619	0.869695	4.76413	4.35404	3.23362	1.39422	1.34815	1.46753	1.25781	0.626304	2.18288	0.577809	1.25735	4.43532	0.230684	3.96135	0.69469	1.43221	1.01668	1.43988	0.240313
ANXA11	8.65177	8.75009	8.88947	8.90362	8.98489	8.93691	8.70656	8.89091	8.74319	8.90036	8.92722	8.87547	8.35627	8.99872	8.89742	9.17028	8.95664	8.97798	8.73097	8.97976	8.91602	8.95489	8.77134	9.17621	8.87547	8.84537	8.76437	8.67488	8.64516	8.90362	8.55494	8.70918	8.74047	8.5367	9.02305	8.35165	8.84233	8.39207	8.90201	8.83627	8.96867	8.35723	8.66096	8.60702	9.25931	8.60573	8.59676	8.7742	8.92401
ANXA13	0.560562	2.26332	4.14532	2.89248	4.53172	3.01422	1.47849	4.49101	0.960895	2.36891	1.68519	1.5536	1.73392	3.43055	0.0318453	4.0896	5.45715	3.67035	1.10405	0.0954027	3.64814	1.74888	3.73867	4.55107	1.81768	5.87963	1.41579	1.39079	1.53014	1.84323	1.50633	1.39365	0.364861	1.12839	1.6023	1.58528	4.2568	1.71082	0.944506	0.217317	1.49111	0.734406	1.07623	1.76831	1.85751	2.05404	2.62471	1.32095	2.29861
ANXA2	8.20843	8.21997	8.23709	7.81268	8.65047	9.0349	8.50975	8.66949	8.93047	8.66949	8.27048	7.93528	7.99755	9.44543	9.72723	9.04161	8.73504	8.50874	8.72951	9.06911	9.01494	8.49889	9.17817	8.65561	9.88267	7.88566	8.16031	9.08698	9.47489	8.7629	9.16831	8.45926	9.21178	7.73911	8.3098	7.45486	8.76167	7.43507	8.56723	8.23709	8.61081	7.79299	7.69881	7.53982	8.91602	7.96382	8.88459	8.01255	10.4725
ANXA2P1	3.42383	3.86612	0.754065	4.92225	4.20799	4.15556	4.43997	3.07902	3.21479	3.57165	2.84656	3.73396	3.58859	5.56253	5.69896	1.92356	4.96789	3.48996	2.02468	3.47094	4.0896	2.78802	5.21751	2.56188	1.67525	4.44449	1.45393	4.14624	5.5465	2.50294	4.67249	3.00362	1.24028	4.02389	0.0854138	4.32927	4.45503	3.81821	4.16242	3.91517	2.01515	4.89954	1.47168	1.85337	1.71782	4.34609	1.94674	3.56475	4.35723
ANXA2P3	4.87939	3.42383	3.75274	4.02515	4.84232	4.26316	4.86288	3.66406	3.65326	3.97804	4.28596	3.97804	4.9854	3.67859	5.51863	3.11822	4.10399	5.0413	4.89954	3.61727	4.52018	5.80178	4.73657	5.47906	6.12685	3.9394	4.07375	5.03023	5.8046	4.43997	5.33187	4.4383	3.04897	3.84985	3.46777	5.0549	5.3701	2.31471	4.33116	3.40943	5.70986	2.9373	3.38825	3.36371	4.45772	3.58111	3.66099	4.36529	4.08212
ANXA3	7.54552	8.70389	8.73357	8.21004	8.32137	8.66949	8.21373	8.96016	8.32808	8.39524	7.85372	8.04291	6.67803	8.9935	8.23425	8.49442	8.26216	8.71353	8.20142	7.45486	7.31834	7.7681	7.878	8.23615	8.25894	8.94028	8.05352	8.48329	8.89239	7.80397	8.8409	8.1264	7.44535	7.88781	8.92556	7.80601	9.28568	8.6414	8.51891	7.91425	8.84855	7.70321	8.16466	8.19234	8.42201	8.36821	7.99527	7.68573	7.7543
ANXA4	6.84013	6.6409	6.50578	6.49008	6.97649	6.54105	6.68357	6.48925	6.19306	6.74144	7.15507	6.91051	6.86477	6.06813	5.99289	6.5231	6.97228	6.9288	7.17746	7.16664	7.2556	6.49331	6.66981	6.89911	7.30898	7.08434	6.3198	6.31619	6.245	6.6723	6.24369	6.64572	7.72185	7.07639	6.71948	7.17898	7.11732	6.71481	6.78755	7.49231	7.12942	7.11779	6.33392	6.96764	7.25341	7.08738	6.76389	7.20368	8.15771
ANXA5	8.4286	9.09421	7.84335	8.26949	9.09067	8.89407	8.82622	8.75009	7.92259	8.03923	8.99872	9.01298	8.67757	8.63414	9.37549	8.85774	9.14184	8.16466	9.16266	8.66096	9.04344	7.91575	8.94518	8.24462	9.10725	9.31591	8.82784	8.87547	8.74188	8.09781	8.57707	7.99446	8.92722	8.96016	8.53056	9.20304	8.70918	8.94832	8.39947	9.12717	8.60573	9.16831	8.03412	8.76167	8.80468	8.88818	9.12032	8.89742	9.55614
ANXA6	7.18975	6.88274	6.75467	6.73973	6.58131	7.11974	6.74847	6.58452	6.78549	7.20927	8.54648	7.83336	7.54978	6.99037	7.23589	6.93729	7.76066	7.46733	6.94487	7.56396	8.11859	6.86158	7.09036	7.63813	7.98028	7.49478	7.83336	7.19779	6.46346	8.05512	6.22359	7.41738	6.20508	7.66205	6.4821	7.76942	6.21557	7.95706	6.71023	7.68074	5.65307	7.93142	6.25528	7.82612	5.80742	7.66139	6.43236	7.16856	7.43805
ANXA7	9.34944	9.12538	8.57798	8.60424	8.97217	8.94667	9.08304	8.83061	9.12357	9.17028	9.04722	8.95164	9.06911	8.74319	9.25931	8.54901	9.09617	8.63892	8.97798	8.85468	9.0165	8.79275	9.0316	8.90501	9.26973	8.9354	9.038	8.96867	9.25039	8.80341	8.69342	8.83627	8.89091	9.20523	8.88297	9.14907	9.00368	9.0165	8.81473	9.10725	9.07647	9.00368	9.10542	9.27657	8.77689	8.80341	8.6894	9.29887	8.94357
ANXA9	4.65445	2.04589	1.10459	2.94363	1.05911	1.07747	1.06392	1.09122	2.86956	3.02284	1.69558	1.63786	0.195315	0.945907	1.27136	3.17747	1.85972	4.20935	3.42047	2.98637	2.54597	3.06233	0.56863	0.23773	2.25277	1.38388	2.5418	2.69724	2.50294	3.89282	1.39079	2.19899	1.08127	0.132612	3.82411	3.78837	2.28072	1.26159	2.97015	0.861924	3.0321	0.235589	2.79292	1.25735	0.975696	1.71838	1.64261	0.636319	1.02243
AOAH	3.93004	4.62218	5.3343	4.08176	4.61825	3.61416	4.70983	5.40741	3.72251	3.36899	3.9342	4.10088	4.97022	4.49182	4.33891	2.39402	1.09986	4.26755	4.98577	4.52185	4.49655	3.1977	5.24896	4.6298	2.79122	3.22658	3.45634	3.73139	3.19653	3.07381	2.77005	2.80689	4.59117	4.52547	5.14464	5.21977	4.54408	3.97174	5.7994	6.05352	3.61472	4.44927	4.01219	3.50146	4.06734	3.6492	3.87371	3.77771	8.52321
AOC2	3.53651	3.42161	3.23249	0.449292	3.937	3.1763	2.22383	0.413858	1.76152	2.52072	1.4518	2.9486	2.41659	2.14647	3.89137	3.43281	4.414	3.64612	2.03197	1.62802	3.15201	3.94464	2.4295	4.46258	0.846651	2.86956	1.20207	3.88282	4.40659	3.93461	4.0256	4.51584	3.7983	4.06822	3.34995	3.29562	4.08587	4.16838	3.15627	0.817119	3.18423	4.00831	2.70499	0.257081	4.42869	1.70187	4.23232	3.88861	3.36838
AOC3	6.25064	7.19424	6.61644	6.78714	7.4782	6.55105	6.76821	6.71139	6.00849	6.55855	7.0706	6.51436	5.74695	5.93235	5.70038	6.02265	7.52805	6.59489	6.99711	7.34597	7.35696	6.97186	6.4457	6.27988	7.9548	6.87401	6.01755	7.21164	6.37092	7.9929	5.73652	5.99674	7.99371	7.30453	7.25071	6.40983	7.91575	6.53505	6.61274	6.88411	6.57392	5.70766	7.31632	5.87646	6.69179	7.33607	8.02992	6.36556	6.47204
AOX1	4.01587	3.81639	2.11643	4.39338	4.53296	3.64109	3.80528	3.33094	3.56948	4.26839	3.92457	3.19226	4.42125	4.47236	4.04542	3.70781	3.58808	3.74481	4.20483	5.08233	5.02943	4.48172	6.30047	3.09986	3.66156	3.93558	3.30153	5.04536	3.86666	4.95175	5.43214	3.75045	4.36992	3.56782	1.19927	2.52506	3.95797	3.72101	3.3905	2.85941	4.08212	3.90005	4.18434	1.95022	3.90896	4.25022	2.75388	3.47757	6.52271
AP1AR	4.9501	4.57846	4.64865	5.2229	4.87363	4.75495	4.32329	4.58452	4.78868	4.81997	4.90271	5.33538	5.272	5.12296	4.73452	3.99726	5.2229	4.77993	5.3369	4.92108	4.64574	4.47877	4.30716	4.60069	4.53254	5.14106	4.97144	5.33187	4.57283	4.58743	4.68096	5.2957	4.59659	5.12847	4.57715	4.86829	4.57079	5.17731	5.38723	4.87033	4.97425	4.96077	4.58986	5.09428	4.77081	4.76968	4.33157	4.96749	4.63387
AP1B1	5.39175	5.46702	5.19197	6.4818	5.42881	4.85855	5.10279	5.95819	5.33114	4.99914	5.39976	5.57043	4.66921	4.51178	6.18188	5.5808	6.09957	4.37491	4.51042	5.31446	5.70724	5.33827	6.10382	5.47368	4.61429	5.77016	4.47913	4.99678	5.67763	5.16178	5.84091	5.2229	4.6106	6.26907	5.43286	5.79494	5.12384	4.52105	4.33256	5.69632	4.4404	6.04873	5.33323	5.83789	4.62651	5.62894	5.09428	5.46702	6.69893
AP1G1	6.3652	5.88603	5.73927	6.02985	6.43774	5.88143	6.1549	5.81399	6.33888	5.76426	6.00373	6.30012	6.34008	6.3109	6.36556	6.4453	6.08318	6.10134	5.93235	6.31054	6.15834	6.02845	6.53932	5.79494	5.83647	5.65978	5.75264	6.51286	6.27806	5.8537	6.4078	6.00224	6.43652	5.88364	5.79842	6.04617	6.01716	5.52979	6.30193	5.88603	6.3952	5.79663	6.10242	5.74977	6.48455	5.82296	6.0857	6.20577	6.11517
AP1G2	3.00224	4.55851	3.52008	3.80271	4.06209	3.34946	3.20446	4.20216	3.0745	3.59161	3.6119	4.79595	3.25849	2.21516	5.77743	3.61825	4.49655	3.81166	2.5538	3.73707	2.00404	3.33031	3.53553	3.09864	1.70377	3.14449	3.13042	3.48672	2.87852	2.91046	3.56782	3.74325	4.33353	3.95088	2.22826	2.49333	4.17915	3.98382	3.32403	4.20396	3.38649	2.7693	1.75661	4.37355	3.71212	3.88621	4.14262	4.22064	4.77515
AP1M1	5.37191	5.83432	5.29679	5.42375	5.86008	5.78209	5.34708	5.75835	5.77234	5.44848	5.64815	5.76706	5.69377	6.27243	6.38367	5.81548	5.70294	5.34897	5.94287	5.60599	5.71615	5.50726	5.69592	6.53028	5.78492	6.22959	6.09699	6.25104	6.22138	6.33321	5.77088	5.98536	6.10596	6.36738	5.52539	6.62766	5.80642	6.02699	5.70226	6.28173	5.90435	6.67352	5.33072	5.94766	6.17687	6.35574	5.71479	5.94689	6.09876
AP1M2	4.52066	3.03267	0.822454	5.56818	0.753074	0.790506	3.15394	0.800243	3.08808	2.6746	3.51586	4.13147	2.94137	1.94338	1.60121	2.41412	1.36908	4.30799	2.51517	2.66641	0.912975	2.40487	4.16012	5.03234	1.89145	3.02874	3.93845	3.95572	1.88271	3.19226	2.44618	5.40587	4.52283	1.9024	1.52524	3.6103	1.83814	5.46159	3.64518	3.39517	4.5417	1.1841	3.7837	2.90907	2.38947	2.35342	1.22869	2.29634	2.65419
AP1S1	4.87773	4.93883	4.65732	4.9825	4.76584	5.19751	5.02028	4.94164	5.21903	5.23918	4.93841	5.0232	5.32492	5.01241	4.53075	5.20524	5.9182	4.69228	5.27715	5.02751	4.86019	5.47799	4.46123	4.76628	5.55548	5.19542	5.16753	5.11457	4.5437	5.13187	4.14802	5.08871	4.69401	4.73098	4.89018	5.19236	4.75573	4.92662	4.7943	4.78312	3.18983	4.69319	4.46523	5.24709	4.8921	4.56863	4.934	4.61476	5.37493
AP1S2	8.91451	8.88459	8.81614	8.59815	8.80341	9.06544	8.66949	8.36108	9.32101	8.90201	8.30786	8.88818	9.2308	8.83342	9.02814	9.23456	9.18647	8.71733	8.71864	9.1312	9.03314	8.99702	8.84233	9.37048	9.32313	8.56599	8.95003	9.04161	9.21812	8.62769	9.08698	8.45678	8.79573	8.66593	8.75009	9.00927	8.50103	8.45058	8.54145	8.74188	8.47116	8.23972	8.46372	8.49552	8.68669	8.60048	8.77134	8.83194	8.80594
AP1S3	1.78788	2.78311	3.012	2.55999	2.82062	2.00086	1.89361	2.60297	1.45446	0.979906	1.83601	2.55283	4.2507	2.74839	2.79208	2.74741	1.2349	1.53228	3.04021	1.68519	2.67547	3.31522	2.77753	1.37574	0.960895	1.44435	1.4926	1.76698	1.6444	1.69719	2.385	1.75605	1.64681	2.81341	0.589046	1.62053	2.23925	3.29493	1.14799	2.25519	1.37574	3.24839	2.63487	1.62328	1.69387	1.88767	1.7433	2.08491	2.65623
AP2A1	2.3344	2.21014	2.32219	2.37644	2.26211	4.69671	4.85936	3.02799	1.27077	0.647526	3.55832	3.16746	3.37234	1.94491	2.37014	1.84014	2.81649	1.65778	2.78311	1.35092	2.23666	2.14988	3.01127	1.54868	2.94494	4.19454	3.00297	2.12646	2.18148	2.12328	2.20215	3.12632	1.41316	3.47697	1.56446	3.50627	1.72865	3.77099	1.74266	2.35887	2.48762	3.78022	1.1774	3.37852	1.61119	4.13242	1.64507	3.44541	3.59831
AP2A2	5.56283	5.24675	5.41071	5.4674	5.65657	5.48298	5.57551	5.50463	5.43105	5.17619	5.7386	5.52327	5.49866	5.50347	5.5126	5.68427	5.63583	5.71412	5.26733	5.8696	5.84978	5.9568	6.26824	5.40992	5.84906	5.86408	5.81096	5.71235	5.37493	6.00957	5.88105	5.92882	5.75471	5.93344	5.86259	5.51193	5.56178	5.39247	5.68507	5.85051	5.28661	5.87248	5.14654	5.07724	6.12916	5.92882	6.04836	5.51049	6.76048
AP2B1	7.70002	8.06003	8.30699	7.71595	7.95706	7.9905	7.66589	7.8508	7.96095	7.47698	8.17759	7.98665	8.56966	8.28998	8.09542	7.9188	7.58049	7.98343	7.95089	8.18688	8.02824	8.13623	8.10721	7.98891	7.93686	8.05117	8.38296	7.72743	8.07823	7.90048	7.60329	7.63944	7.34706	8.11445	8.34088	8.18131	7.62362	7.93528	7.96949	8.02357	7.90258	8.46921	7.91728	8.30128	7.79031	8.16897	7.83105	8.31387	8.15237
AP2M1	8.20419	8.82183	7.80661	8.53808	8.37815	8.69877	8.42201	8.78686	8.59077	8.66349	9.07098	9.30456	9.27411	9.0399	8.49195	9.07792	8.78686	9.00927	7.98107	8.10879	8.54901	8.70253	8.36108	8.86667	8.65305	9.04344	8.72819	8.36108	8.90821	8.9585	8.86529	8.57573	8.72951	9.1312	8.3448	9.07293	9.02814	8.7811	9.15703	8.94357	8.95489	8.90501	8.81614	8.51661	9.18421	8.80202	9.22848	8.83061	8.74188
AP2S1	7.53047	7.28619	7.71794	7.24585	7.45715	7.6569	7.20071	7.37604	7.14555	7.71464	7.56396	7.54732	6.85326	7.43288	7.97637	7.65949	8.05017	7.67827	8.29849	7.68759	8.25788	7.21585	7.89755	7.42905	8.18414	7.96551	6.95544	7.76596	7.93446	7.96382	7.81894	7.10613	7.08258	7.80864	7.15896	7.8341	7.26138	7.77806	7.3638	8.11931	7.15896	7.65328	7.04908	7.62101	7.40746	7.8751	8.14381	7.41629	7.66274
AP3B1	5.89398	5.53302	5.3516	5.78313	5.97589	5.8692	5.78869	6.32244	5.72481	6.08422	6.23185	6.06481	5.45581	5.96919	6.37057	5.92495	5.8311	5.74033	5.97589	5.51863	6.13925	5.8151	6.08211	5.88258	6.43279	6.43814	5.96812	5.80251	5.79874	5.70656	6.14463	5.74657	5.71339	5.46197	6.42292	5.798	6.00442	5.85305	6.15307	5.79146	6.28604	6.22636	5.96081	5.78841	6.52586	6.0641	5.76573	5.72701	6.61402
AP3B2	4.29774	3.53432	3.34725	4.05036	2.84058	3.31522	0.444823	2.73287	2.80689	3.22415	3.12191	2.50203	2.50398	2.95625	1.89597	5.13715	1.99805	1.25995	3.57366	1.72865	3.69908	3.80419	5.19161	1.36074	4.83905	3.34493	1.97972	3.32403	4.23059	3.42383	4.25313	3.5943	3.11758	3.86421	2.91487	3.98382	1.21329	3.03616	3.85331	1.40347	2.85025	4.66058	4.0411	3.78421	4.08671	0.699652	4.254	3.44718	3.31933
AP3D1	7.57922	7.37017	7.57238	7.18528	7.62101	7.41514	7.12454	7.39658	7.28092	7.20675	7.45953	7.08547	7.51273	7.53162	7.2127	7.35641	7.00747	7.58605	6.77649	7.45953	7.01439	7.83261	7.20368	7.58605	7.17592	7.75363	7.28619	7.41687	7.79156	7.46788	7.41456	7.54385	7.19667	6.81675	7.65757	7.06272	7.27665	6.98563	7.69109	7.36141	7.72592	7.39081	7.76463	7.57664	7.60519	7.47417	7.60395	7.30509	7.27622
AP3M1	6.6739	7.11084	6.94031	7.1192	7.25288	7.03625	7.21164	7.08434	6.80859	6.70607	7.09362	7.3493	7.35418	7.07639	6.75467	7.38309	6.91495	7.10984	6.76905	7.18975	7.13151	7.59466	7.17213	7.09506	7.17213	7.10705	7.26088	7.11632	7.26236	7.02952	6.86251	6.99223	7.22271	6.92211	7.40639	6.93456	7.36649	6.91002	7.43507	6.88628	7.09739	6.88992	7.2789	6.61842	7.25932	6.77609	6.55543	7.40746	7.09127
AP3M2	6.00053	6.17433	6.25673	6.08211	6.36215	6.44108	6.17506	6.81853	5.55514	5.60125	6.01908	6.41129	6.26345	5.86989	5.81195	5.94766	5.4898	5.95459	5.80011	6.46959	6.12158	6.2047	6.05423	6.44383	6.34691	5.99711	6.48925	5.92705	5.95966	6.12916	5.66264	6.02699	6.65361	6.70429	7.27622	6.91416	6.71606	6.43159	6.94074	6.77831	6.8228	6.84357	6.54752	6.19527	6.55026	6.34116	6.83498	7.09174	6.43997
AP3S1	9.16661	9.06911	9.09617	8.76437	8.84393	8.73097	9.00199	9.07647	9.38772	9.2308	9.10922	8.80063	9.288	9.05063	8.81614	9.09421	8.93204	8.7515	8.86529	9.0316	9.31591	9.35929	9.02466	9.23911	8.96696	8.91141	8.80341	9.48485	9.25478	8.91451	8.81185	8.7742	9.66304	9.17219	9.06727	9.1883	9.19222	8.89407	8.95003	9.57135	9.25478	8.87547	8.95333	8.93047	8.98823	9.23667	9.054	8.8088	9.40381
AP4B1	5.84301	5.56709	5.76837	6.08353	5.87963	5.91428	5.98056	5.7361	4.8281	5.58262	5.80288	5.39502	5.68507	5.70656	4.94879	5.80178	5.34597	5.67272	5.20677	6.00542	5.61968	5.85874	5.61107	5.72257	4.81435	5.53857	5.72257	5.6714	5.43177	5.46995	5.15821	5.13992	5.7785	5.68389	5.93165	5.64781	5.92085	5.53489	6.02053	5.61325	5.91398	5.45227	5.73102	5.73794	6.1089	5.5762	5.66015	5.75873	5.26619
AP4E1	4.16669	4.45772	4.18673	3.58712	4.4163	4.46821	4.76839	3.67035	4.04794	4.34125	4.83415	4.75963	4.12773	4.76504	3.59783	4.45594	4.07666	4.84472	3.98956	4.59415	4.17439	4.47418	4.23418	4.39435	4.52146	4.42507	4.06008	4.76264	4.45422	4.02091	4.88686	4.69978	4.59703	4.31052	4.60405	4.0145	4.76177	4.3881	4.77651	3.79178	4.78443	4.27454	4.64865	4.25818	4.3727	3.71845	3.87648	4.79164	4.96291
AP4M1	4.47085	4.74597	3.50799	2.8247	4.57454	4.80121	5.12654	4.79379	4.67044	4.62817	5.3369	5.50269	5.54726	5.11057	5.09259	5.57261	5.64219	5.10875	4.32117	4.84028	4.80609	5.94398	5.58181	4.20122	4.92225	5.03977	4.83616	4.27628	5.26733	5.21867	4.64493	5.4806	4.69841	5.64256	5.46053	4.65775	3.53319	3.77413	2.55999	4.78524	5.38464	4.34255	5.42103	2.7709	5.24896	3.4411	3.83445	5.2434	4.87813
AP4S1	6.3797	5.6651	6.10067	6.06522	5.93094	5.68201	5.62609	5.26655	5.76282	5.19022	6.10318	5.4898	5.77088	5.21387	5.17067	5.78417	6.27347	5.58962	5.66297	5.77122	5.93304	5.51738	5.6665	5.39013	5.1836	5.69855	6.06048	5.39684	5.87713	6.09736	5.37493	5.93235	5.5808	5.82192	5.95528	6.12297	5.7361	5.64848	5.51896	5.69074	5.95055	6.02559	6.00264	5.47368	5.30911	5.43973	5.15521	5.74585	5.64437
APAF1	1.69091	2.32082	1.7392	1.7482	4.75454	1.68457	1.68697	3.82213	-0.0840358	0.20334	0.475948	0.937162	1.60597	1.99116	0.565552	1.43559	2.72495	-0.246945	1.27249	1.709	1.14547	2.93662	2.55283	1.2911	1.34975	0.470086	0.956275	3.05496	1.78657	0.723139	1.35523	0.950671	1.53283	1.79293	1.36908	2.0114	1.39079	2.64048	2.38249	1.76698	3.233	0.956275	3.08097	0.175492	1.46809	1.29726	1.37015	2.32082	4.13147
APBA1	1.84388	4.10633	2.66752	1.91441	1.81332	1.81894	1.81451	3.41553	1.31732	1.7439	1.60661	1.74944	3.11758	1.2984	3.65174	2.96156	-0.0802898	1.92194	1.09811	1.79166	2.96878	0.868094	1.79716	2.15345	2.1597	1.17234	3.38022	2.64648	1.70429	3.6366	1.45446	1.87522	1.40285	2.94292	3.52008	2.57286	2.19439	1.2349	2.36004	1.37423	3.49715	1.97213	2.06439	1.83459	2.69616	1.4018	2.7889	2.13241	1.03091
APBA2	1.62109	1.58662	1.67584	1.67642	1.61928	1.62442	1.62393	1.63147	1.15192	1.22693	1.40769	1.41473	1.56611	1.32367	3.28507	1.92514	0.0253627	0.926937	0.28029	1.74888	3.54957	1.84932	4.31432	1.16539	1.05106	0.949365	0.4892	0.474211	0.719076	0.804378	0.704756	1.22869	0.361515	1.61983	2.27289	2.55083	1.08189	1.46906	0.935785	1.68392	0.943918	2.79371	0.62225	3.0396	1.45446	2.13899	1.41528	1.46809	1.16371
APBA3	5.79977	5.50688	5.69038	5.59659	5.22446	5.11492	5.5977	5.0797	5.72074	4.80774	5.24936	5.45407	4.88646	5.25894	5.73687	4.81512	5.29123	5.63161	5.37085	5.66403	5.80325	5.90737	6.16316	5.09589	5.86377	5.44464	5.18405	5.83789	5.15638	5.70328	5.93665	5.78898	5.20677	5.24177	5.09508	5.38835	5.31484	5.74164	5.29227	5.62317	4.90673	5.03067	5.18645	5.19428	5.2266	5.13035	5.49866	5.6239	5.36972
APBB1	1.71192	5.74585	1.7633	1.77082	2.28785	5.16336	5.23468	5.56535	5.15564	5.28701	5.15483	4.10586	4.31349	4.12773	5.26085	2.96017	3.95706	3.82366	5.34344	4.66706	4.93996	5.32565	5.09259	5.40163	4.40302	5.64781	4.69802	5.11769	4.49013	6.0157	4.96821	5.88987	4.15292	3.08675	4.86752	4.22433	5.87549	3.33094	5.17768	2.99203	4.60702	1.95974	4.19673	3.29691	5.70656	4.46778	2.65036	4.57626	3.75899
APBB1IP	1.73974	1.69502	1.78589	1.79716	4.01689	1.85204	3.79222	3.42327	1.24028	0.666324	1.87444	2.76507	3.3985	1.53175	1.21431	3.54167	2.83729	0.250282	2.7693	2.89021	1.79537	3.11822	3.41392	1.93433	4.10088	1.43334	0.584727	0.907022	1.08067	1.5536	1.35813	0.297237	3.35855	2.99545	1.28333	1.94866	3.012	1.56505	4.39036	4.25915	1.67098	1.41203	1.79716	0.758354	1.19636	1.67098	2.68791	1.48207	6.37057
APBB2	6.40901	5.77782	5.66752	5.3409	5.3234	5.52681	5.50911	5.64707	5.76739	5.75115	6.06522	5.74977	5.48129	5.82226	5.9828	6.06263	5.75298	5.6401	5.40852	5.68573	5.59369	5.38066	5.66332	5.56357	6.00092	5.52077	5.87963	5.41585	5.70797	6.55733	5.88364	5.99289	6.48736	6.40319	5.44767	5.59514	5.99324	5.79256	5.86511	6.32369	5.52002	5.61473	5.67209	5.63054	5.98536	5.87512	6.21414	5.57161	6.01392
APC	5.69002	5.33072	5.16753	5.30169	5.38207	5.3141	5.69209	5.46502	4.95948	5.37383	5.41996	5.37347	5.28009	4.99994	4.91714	5.16214	5.71651	4.71793	5.36595	4.65816	5.07145	5.04953	4.97988	5.07566	5.19383	4.76797	5.81399	4.78186	5.17106	5.1691	4.9363	5.46665	5.07928	5.4751	5.59243	5.35347	5.4266	5.46886	5.47472	5.54275	5.59695	5.54318	5.85437	5.69038	5.34457	5.51863	4.22749	5.72186	5.57261
APC2	3.87942	3.94752	2.36328	3.7654	3.78483	3.20083	4.69886	4.37399	3.43446	1.55243	2.29756	1.31995	3.04622	1.23217	1.72388	-0.15642	3.76892	0.0719055	0.804378	3.45577	1.27585	3.03441	5.53709	2.87388	1.17176	3.79687	3.23478	1.39992	3.21922	4.38552	2.30247	1.72923	2.90011	3.62473	1.5334	2.05315	3.31757	1.9884	1.40823	1.52241	2.14282	3.1977	3.90474	2.93517	0.990852	3.73652	1.36621	2.69724	2.04796
APCDD1	6.19597	6.25104	7.59051	5.96919	6.98563	6.80899	7.0403	6.41096	5.92146	7.40812	7.95943	7.238	5.81229	6.74435	6.61062	5.99854	6.52665	7.20521	7.15221	5.39431	5.98322	6.03664	5.99921	6.62967	5.91746	6.51286	7.16414	5.38835	6.10855	6.34008	5.8209	6.5196	7.06091	7.27665	7.18426	6.59966	7.0582	6.93414	6.59375	7.0792	7.1192	7.23738	6.92168	6.85675	7.98811	7.90112	6.66115	6.7376	7.4816
APCDD1L	1.43002	1.3964	2.34664	1.47561	1.43444	1.58201	4.77608	2.80109	2.60205	0.129201	1.29005	1.59001	1.34975	3.42989	1.11491	1.82104	1.33649	1.7752	0.867405	0.107014	2.20005	1.98589	1.35092	3.67706	5.68128	0.70579	3.79882	0.0940788	0.64039	0.528014	0.239501	1.22023	1.21858	3.45856	1.49908	0.713077	1.50747	2.91487	0.582182	0.674886	0.818033	0.241364	1.26517	2.0907	1.43169	2.18643	2.22705	2.02786	1.15724
APCS	3.378	3.95664	3.3372	3.53801	3.37516	4.27673	3.87164	4.22699	3.7752	4.38945	3.52683	4.09772	4.56475	2.92474	4.90393	2.91754	4.95382	2.11868	4.55151	3.41291	3.97804	2.76398	4.92623	1.07437	4.39632	3.4992	4.64747	4.01254	4.45282	3.82756	3.89762	3.9623	3.74839	4.50956	4.18673	4.68522	3.2428	4.86104	3.43227	4.19718	3.8727	4.70394	3.23362	5.08835	1.17346	3.25261	3.91232	4.3274	3.50246
APEH	6.47481	6.65405	6.9288	6.61681	6.42487	6.82731	6.46506	6.618	6.78172	6.85088	6.75553	7.18577	6.64289	6.32631	6.47037	6.88411	6.88628	7.07685	7.07593	6.3343	6.59809	7.06362	6.47766	7.03859	6.84448	7.22105	6.93289	6.65946	6.55145	7.23642	6.80472	7.30124	5.81818	6.28823	7.06688	6.88992	6.73592	7.0163	6.64125	6.62669	6.57729	6.85421	6.67803	7.4431	6.85041	7.50993	6.66362	6.66616	6.063
APEX1	8.32022	8.66949	8.528	8.55021	8.62377	8.8769	8.70526	8.87246	8.88459	8.76564	8.98148	8.94357	9.11647	9.15314	9.40621	9.04344	9.06157	8.56599	8.76032	8.30321	8.28902	8.44401	8.70389	8.75009	8.91888	9.0746	8.72951	8.48433	9.03314	8.66949	8.74596	8.42094	8.65692	8.72819	8.46131	8.5075	8.55612	8.50211	8.45349	8.51087	8.57707	8.71202	8.63892	8.38981	8.60573	8.57798	8.27326	8.65047	8.62639
APEX2	5.02188	5.37304	5.14654	4.8188	4.84683	5.0533	4.40979	5.12808	4.62343	5.25966	5.51623	5.41107	5.45647	5.15821	4.95672	5.79115	4.09731	5.00805	5.31021	4.30716	4.64787	5.22249	4.45282	5.57656	5.44882	6.04873	5.13263	4.89018	5.23005	5.22092	4.8766	5.03933	5.40553	5.41071	5.43029	5.36383	5.11457	4.91387	4.56118	5.34375	5.27312	4.95294	5.41739	5.38503	4.95795	5.47196	4.95869	5.38281	5.5502
APH1A	6.02224	7.13405	7.06091	5.37419	6.16206	5.66997	6.11483	6.14499	7.02562	6.52427	6.10458	5.96003	6.51523	6.36484	6.41274	6.43196	6.69422	5.79323	6.65528	5.47836	6.05095	5.88218	5.3369	6.15601	7.37128	6.8717	5.60082	6.04761	6.95179	5.78277	5.77351	5.74202	5.72552	5.81366	5.71548	6.07028	5.28206	5.95195	5.27891	6.04102	5.1047	6.02122	5.48228	6.08802	5.51082	6.0075	4.96953	5.46502	6.51879
APH1B	5.36894	5.22858	5.60973	4.92418	5.03356	4.75738	5.11136	5.50871	4.23142	4.98665	5.19049	4.71833	6.38016	4.8345	5.53272	5.32492	5.60801	4.22749	4.69441	4.00873	4.60936	4.71495	5.59801	5.31087	5.84301	5.37156	4.29048	4.45904	4.91216	5.1641	4.78959	4.57931	5.16377	5.10119	4.70475	5.6619	5.2359	4.85817	4.82489	4.79632	4.60574	5.97409	4.54039	4.61738	5.28737	5.51014	4.87446	5.06096	6.41546
API5	6.21054	6.00264	6.14351	5.94031	6.43015	6.22171	6.15908	6.30598	6.52988	6.28981	6.35493	6.31283	6.52123	6.5093	6.46069	6.04102	6.45047	6.1575	6.4878	5.84091	6.20096	5.96003	5.82934	5.90579	6.00884	6.26784	6.72874	6.03316	5.98886	5.81785	5.98322	5.93126	6.13432	6.30193	5.84978	6.42784	6.03594	6.13432	6.52165	6.62146	6.21277	6.26907	6.11594	6.33848	6.22171	6.49494	5.94652	6.28371	6.3477
APIP	7.84871	8.011	7.41054	7.85787	7.62853	7.43065	7.91806	7.42228	7.89082	7.84407	7.38309	7.34482	7.55589	7.65328	8.09879	6.90005	7.74963	7.64627	7.13651	7.50278	7.42124	7.47474	7.2237	8.07157	7.29321	7.44647	8.11709	7.56041	7.81405	7.42905	7.59466	7.42856	7.68283	7.79371	7.03149	7.56337	7.73378	8.1758	7.36026	7.19572	7.12406	7.0088	7.50391	7.26185	7.21844	7.37504	7.49109	7.13651	7.35752
APLF	4.37842	3.94222	4.50866	5.41809	3.2883	3.52895	3.94947	4.34836	3.79432	3.8774	4.95456	4.66788	4.66879	4.30178	1.67215	4.33157	4.56592	4.42603	4.08403	3.91076	2.58263	4.18166	4.64947	4.35404	4.06734	4.63553	3.88954	3.84985	4.04881	4.4404	3.98427	4.07106	3.90701	4.4889	4.05124	4.63158	3.76442	4.25361	3.78121	3.90896	3.75361	4.3833	4.25534	3.46673	4.05493	4.78693	3.54115	4.49739	4.78186
APLN	7.5182	6.65573	8.30038	8.23615	7.28518	7.46434	7.67698	7.43392	7.43392	7.69881	6.85421	5.96812	6.19451	7.89902	7.18095	6.99311	6.90558	7.02614	7.01344	7.21743	7.05416	7.0023	7.28987	7.66713	7.51756	8.38582	6.49776	6.84997	7.7489	6.71696	5.56818	7.14911	6.18618	5.93271	7.43013	6.38212	8.00638	7.2433	6.18266	6.61017	7.07261	5.96546	6.87975	6.40854	5.81437	7.15369	7.48412	6.16654	5.86846
APLNR	6.63452	7.04183	5.61075	6.74144	5.12217	6.72316	6.38412	6.71865	7.07781	5.5126	6.40243	6.07183	6.19808	6.43052	6.10028	6.07406	6.41546	6.9324	7.25662	7.38863	7.65328	6.76483	7.28146	7.10613	7.13194	6.75101	7.38136	6.10344	5.90234	5.25712	4.95987	5.8021	5.97772	5.95088	5.9629	5.48194	5.76469	6.08731	6.28787	6.70429	4.96666	4.1706	6.10286	6.11857	4.34973	3.14124	6.70763	6.25306	4.0508
APLP1	3.42553	4.6106	4.25636	3.18234	5.09069	4.5437	4.83616	5.97698	3.40699	3.9361	4.1877	4.42294	3.63564	4.07715	5.7277	3.18602	3.3985	4.30178	3.54382	3.47536	2.80109	3.44433	2.29283	3.83445	2.6396	4.67249	4.9501	4.12954	3.86711	4.86829	4.03502	4.85606	4.21489	4.65976	5.71794	6.07953	3.77712	4.8176	5.9422	6.63041	5.05102	5.51298	4.27454	6.46147	5.76947	6.60576	4.56863	5.54236	4.30974
APLP2	8.08236	8.10204	7.71352	7.96382	8.75913	8.51891	8.12296	8.58482	8.30404	8.3448	8.35912	8.16031	8.9354	7.97182	8.26496	7.74469	8.55831	7.92767	8.26583	8.08576	8.51891	7.70966	8.33996	8.08328	8.3931	8.32626	8.45466	8.2069	8.05275	8.5041	7.93142	8.32232	8.16715	8.49666	8.10721	8.41985	8.28902	8.53808	8.64647	8.81614	8.27614	8.61842	8.21645	8.71997	8.69079	8.62234	8.14292	7.99446	8.34675
APOA1	4.91011	5.14694	7.39591	5.23427	5.88466	5.94287	4.58498	5.06585	7.83701	5.91533	5.92882	5.45334	5.64678	5.45985	4.34209	4.27091	5.87619	5.91363	6.62891	6.76599	6.24646	4.72429	5.04801	7.46434	5.86222	5.87401	5.81297	4.88023	6.43488	4.06499	5.30638	5.89362	6.80081	6.67517	6.08353	6.82322	6.34077	5.4266	8.44604	8.96531	7.01533	7.59884	6.15453	7.18263	6.99177	6.5133	5.88533	8.48109	6.56022
APOA2	2.76844	2.54796	3.28396	2.28175	3.70831	1.39756	2.8972	1.28451	2.90763	2.1205	0.217317	1.67642	1.21006	2.41659	0.261743	3.13367	2.1597	3.41392	0.693607	3.23065	0.693607	1.16874	0.726979	1.81831	1.6216	1.65548	1.40403	1.83601	1.40769	1.6187	1.43559	1.32095	2.44832	3.12562	0.637629	3.14747	1.87891	1.48415	1.94674	0.726979	1.82391	2.46533	1.13484	0.704756	1.60407	1.61298	1.64203	0.576236	0.166911
APOA4	5.23076	4.23601	1.55587	5.07566	4.26135	3.7669	3.40121	0.730781	3.95706	2.82301	3.26916	3.87986	3.57165	4.74032	4.96988	2.83245	1.55187	2.29043	3.90511	3.46449	5.15153	5.50124	4.55989	1.81964	2.48558	3.46015	2.63206	2.68026	3.5999	3.13303	5.3701	5.83579	3.21353	1.66556	2.35118	2.11106	4.44129	4.77172	1.77082	1.36227	3.06548	1.19868	5.35387	1.10045	2.85879	4.8893	3.48486	3.43765	4.07623
APOA5	3.90422	3.35169	4.0308	4.22829	2.91201	3.02799	2.80343	3.02284	3.92171	3.88819	2.87034	3.44376	3.3262	4.2279	2.44523	3.81639	3.43606	2.54496	2.55772	4.52675	1.34221	4.75914	1.46197	3.48002	2.78398	3.74128	4.15786	4.43489	3.29865	3.38195	3.36604	3.7983	1.81584	1.71493	3.52514	4.86104	5.02751	3.32919	3.24103	4.08132	5.44324	4.69623	3.77468	2.75227	4.25224	1.88696	3.74534	3.18922	2.30126
APOB	5.40852	5.02229	4.08546	5.54608	4.92736	4.25586	5.27312	4.69181	5.49083	4.54547	4.25636	4.18966	3.04224	5.89779	4.47278	3.88037	3.52572	5.15073	3.81119	4.26839	4.3807	5.41848	6.27203	2.8173	3.57526	4.16441	5.43065	4.27917	5.88782	4.73139	4.74748	4.55549	3.68502	2.30969	5.272	3.73546	5.6411	5.50946	5.50269	3.36436	5.28239	5.63442	4.57931	4.56118	5.08043	5.20715	3.2319	5.06138	6.6239
APOBEC1	2.14515	2.77753	4.09362	0.671627	2.7824	2.90544	3.98382	3.93745	3.26083	2.50294	2.53878	2.49333	1.52858	1.23101	4.48928	3.12684	1.4555	3.43172	4.11314	3.41055	0.0685046	1.04334	1.97684	3.51786	1.0174	5.46817	2.07309	2.11868	2.59934	2.8084	2.30723	2.11746	1.58261	3.04158	1.72388	3.6119	3.58808	4.71318	1.6875	0.915657	0.926937	2.69616	4.03646	5.10619	3.18541	0.970742	1.86626	1.9152	2.97464
APOBEC2	9.42408	9.40621	10.4725	9.49493	9.30704	9.57704	9.2716	9.038	10.5543	9.81976	9.92621	10.0957	10.1961	9.52613	9.36585	9.86013	10.2432	10.0766	9.93001	10.1403	9.95831	10.451	10.1913	10.2864	10.0839	9.93001	9.49493	10.0449	10.0839	9.24788	9.93765	10.2625	8.98489	9.34543	9.04878	8.96357	9.06157	9.26526	9.55869	9.4645	8.50005	8.88297	9.72391	9.45734	8.9585	9.3185	8.57329	9.53655	9.55869
APOBEC3B	4.92225	4.24151	5.0188	4.51134	4.83576	3.78689	5.3296	3.79323	4.46523	4.78034	4.09948	4.476	4.53645	4.08762	4.68522	5.19502	5.28085	5.15977	5.02628	5.15073	4.50033	3.97174	3.65744	4.70475	4.95914	4.45772	4.20661	4.11886	4.44398	5.33114	4.19327	4.60153	2.88723	3.51687	4.5625	4.82325	3.96087	4.26316	4.64051	4.25361	4.6106	4.07483	4.66141	5.09544	4.49058	4.7111	5.77234	4.31987	4.93883
APOBEC3C	6.54067	6.96447	6.01136	7.01584	6.78508	6.79947	6.90135	6.76905	5.97269	6.70273	6.26537	7.04381	7.01205	6.87039	6.68826	6.62351	7.04128	6.7514	5.76426	6.5821	6.43052	6.43924	5.94287	6.19701	6.35728	6.59557	6.73632	6.02845	5.90298	7.06875	5.97735	6.31248	6.41168	6.24032	7.03625	6.62188	6.69977	6.55429	6.64327	6.34116	6.45593	6.2773	6.61062	7.15955	6.9801	6.82953	6.589	6.30308	6.44957
APOBEC3D	4.2469	4.69441	4.34075	5.30279	4.71673	4.55319	6.19162	4.79513	5.02791	4.28455	4.65816	5.2156	5.46159	5.42626	5.59733	5.0749	2.66375	4.99914	5.13873	3.52219	5.09467	4.88849	5.49783	4.17109	5.85717	4.17815	4.77172	4.84028	4.69019	3.91823	4.10913	4.45991	4.68689	5.3701	4.76413	5.4787	5.03767	5.86377	5.16712	5.29048	3.58162	5.56105	4.16344	5.0484	5.24851	5.50083	5.48129	4.73182	5.40163
APOBEC3F	5.36819	4.5437	4.73267	4.95339	4.88726	4.68096	4.34609	4.51042	4.00519	4.70268	4.52105	4.54851	5.38537	4.03792	4.95795	4.63341	4.79632	4.85817	5.31484	4.21802	5.02751	4.65358	5.44848	4.28246	4.10301	4.6217	4.91714	4.30883	4.19009	5.2839	4.23102	4.62259	4.09819	4.66448	4.78997	4.65936	4.56818	5.08003	4.49101	4.54809	4.66788	4.82163	4.43183	4.67336	4.31773	4.66314	4.50318	4.98022	5.12847
APOBEC3G	4.33396	5.0488	5.41659	4.06778	5.06462	4.44891	5.00111	5.18845	4.67932	5.26	4.48211	5.46307	5.60341	4.91993	2.98354	5.08916	5.2011	5.73579	5.40049	5.1568	4.54211	4.99678	4.23142	5.74033	6.27243	4.79553	4.46209	4.46032	4.83616	5.13954	4.69362	4.14757	5.6619	4.76301	4.51626	4.91137	5.47472	4.41499	6.08137	5.91972	5.11328	5.02188	5.81259	5.37994	5.0143	4.73573	4.2939	5.1477	7.31517
APOBEC4	3.14189	3.81304	2.88288	3.35516	3.55562	-0.459521	3.83063	2.18007	4.0145	2.99969	4.0445	3.57229	3.92637	4.15657	4.33809	3.34554	4.07018	3.93371	3.32403	3.21103	4.20355	3.29063	4.36949	3.99012	2.76398	4.42125	3.17747	4.71833	3.44848	3.92457	4.40889	3.25676	1.43988	3.13303	3.10992	3.65374	1.21968	4.13979	3.82411	3.94271	3.37067	3.80721	3.36254	4.45375	3.80316	1.48264	2.02468	4.02987	3.74325
APOBR	0.60775	2.14647	0.654809	2.79122	3.63513	2.3395	0.613202	2.59313	1.17843	2.60488	1.71192	2.36559	2.91613	4.27322	0.998206	3.05563	1.42352	3.83002	0.760188	3.21857	1.19157	3.56782	1.16428	3.98709	1.20159	3.18865	0.16258	1.0768	1.97972	0.130522	2.90763	0.551327	1.6	4.19009	1.7765	2.00086	1.70249	1.31397	0.900813	1.60893	1.08189	1.21858	1.04132	4.17915	4.20216	2.64331	1.32367	1.13773	1.64916
APOC1	3.93371	4.80729	3.07508	3.5474	4.013	3.8407	3.82411	5.1641	4.51086	3.59014	5.33574	3.54791	5.42593	4.28772	5.21311	4.53685	2.43073	4.90839	5.39247	3.67903	0.763619	4.67249	4.97307	3.28779	2.06978	3.63859	3.53902	3.23362	4.43135	4.94799	4.30397	4.02091	3.65583	5.77494	5.02188	4.22021	3.86515	4.37668	4.45686	3.72353	4.77346	3.98285	4.33721	4.80328	3.82855	3.24595	5.08437	4.10301	3.64109
APOC3	1.435	1.40086	1.48319	1.48088	1.43831	1.43058	1.43121	1.44381	1.72618	0.261743	0.802735	1.61639	0.156516	-0.0922075	1.19759	1.30208	1.07202	2.72027	0.400684	2.54989	0.883308	1.99308	3.71419	-0.0181323	1.51094	1.48207	1.08871	1.06691	1.51424	1.15724	1.03947	1.12468	0.579204	3.89606	0.199111	1.11307	0.818033	2.30457	0.395111	0.209555	1.49969	1.68327	2.90472	1.6572	2.77005	1.78657	0.893434	1.61404	1.09188
APOD	8.13796	8.08918	8.52105	8.66096	7.16057	8.50318	7.2556	8.99702	9.15314	8.74047	8.64915	9.61486	7.9741	5.81717	7.32429	7.58921	7.47084	9.054	8.93359	9.47994	8.85929	7.48043	8.13044	7.93985	9.73607	9.05063	8.17402	8.38875	10.1739	8.22372	9.41351	8.94518	9.15495	8.06253	9.06544	9.43862	8.20775	9.04722	8.19567	8.85468	6.99747	8.2752	8.49067	8.76857	9.00927	9.87688	7.6814	9.98269	7.52008
APOE	5.56776	5.64924	5.9911	4.92348	5.65444	5.38574	3.89949	5.5808	6.82731	5.10544	6.05778	6.33622	5.72074	5.22481	5.92085	4.86989	5.47472	5.63902	6.93773	5.74585	6.58749	5.161	5.42447	5.06344	6.6641	6.02016	5.50871	5.31866	5.90737	6.32631	6.28136	5.74448	6.74752	7.76332	5.34673	6.57766	5.23115	6.14046	4.5699	6.13292	5.21828	6.39846	6.05565	6.13034	4.22749	5.2957	7.70724	5.52794	4.77391
APOF	0.431616	3.10916	3.25003	3.60054	0.538221	0.451505	0.431616	2.54894	1.45496	2.1789	0.866006	2.88941	1.69719	1.81964	0.487369	1.34815	1.16135	3.75801	3.03892	3.3602	0.25878	0.773064	4.26494	3.47697	0.539753	2.44717	1.63035	1.58041	1.66494	2.01999	1.58889	1.58943	0.462089	2.86086	0.642752	3.60704	3.04556	2.56475	2.98982	1.18584	2.53777	0.946592	1.04704	3.99259	3.83799	3.06736	2.11338	2.09263	2.45798
APOH	0.15298	0.131626	0.15764	0.169861	0.158918	0.160169	0.150803	0.153998	2.88514	3.04086	3.32287	3.10916	2.97538	2.94137	1.87598	2.44717	1.65778	3.73867	1.33649	4.11134	1.457	1.83601	1.68519	2.69437	3.74792	0.192357	-0.0153482	0.214867	0.220225	0.0651668	-0.00991589	-0.0153482	3.13483	3.83253	2.58054	1.83814	1.66978	3.72154	2.07943	2.5853	2.92326	1.60938	3.8246	3.16987	3.67337	3.59727	2.92399	3.226	3.14322
APOL1	1.14547	1.12012	5.29969	1.19868	5.37714	4.65533	3.33219	4.837	5.7859	3.7523	3.83976	4.41583	6.96811	3.86463	1.38388	4.52505	4.15831	5.43937	4.35495	5.23627	5.74519	4.88329	3.36488	4.07666	5.07107	3.91121	3.1763	4.13932	4.07623	1.35754	4.8114	3.54167	4.29136	2.59227	3.66251	2.90907	3.67223	0.408658	4.84432	5.4826	1.87971	0.440853	4.13719	1.64377	4.04152	2.70874	2.85228	2.00854	6.85633
APOL2	5.98781	5.57119	5.82405	5.8992	6.48495	6.24646	6.31619	6.60364	5.66471	5.40741	5.71378	5.54085	7.19727	6.16244	6.28173	5.51966	6.43567	5.72186	5.64994	5.84659	6.22442	5.97374	5.8372	5.73312	5.66369	5.7211	5.30601	5.95124	5.80325	4.91332	5.94109	5.12344	5.23342	5.18612	5.18323	4.93589	5.34562	4.74633	6.0075	5.35387	5.96438	5.28938	5.35638	5.19502	6.24925	5.60414	5.29932	5.35565	6.00684
APOL3	5.8021	6.60486	5.67801	6.62546	6.62583	7.07962	7.10325	7.26795	7.16358	7.07507	6.5562	6.86477	7.51756	7.30085	7.24854	7.12318	6.42526	7.56273	6.57696	7.03769	6.59097	6.89466	6.74671	6.77113	6.64804	6.07151	6.54218	6.19341	6.93414	5.69146	7.24585	6.26716	6.69931	5.86547	7.26444	6.3267	6.46542	5.63943	7.08738	7.04573	6.58131	5.83975	6.86293	6.76389	6.58862	6.07612	5.6073	6.55978	7.38476
APOL4	2.04273	0.891847	3.58002	2.40385	4.69671	0.950671	4.5546	4.21574	3.42553	1.51465	3.49611	3.88819	6.5683	1.34868	3.74634	1.15192	1.7433	1.81268	3.18112	4.65358	4.13444	2.36785	3.60443	3.93371	4.16799	1.51748	3.72668	2.99278	3.07772	0.976453	4.0896	2.05107	1.0906	1.33142	2.92474	3.20317	2.5009	1.58041	1.69668	4.34426	3.27084	4.31731	2.29283	3.01127	2.94922	1.83814	1.7409	3.39227	3.88374
APOL5	0.15298	0.131626	0.15764	0.169861	0.158918	0.160169	0.150803	0.153998	3.68291	3.54791	3.68006	3.74426	3.43227	1.63497	2.88514	1.80531	1.66796	2.17134	1.48264	1.58423	2.64545	1.89844	1.5815	1.71957	1.32256	0.139802	-0.105208	0.214867	0.701758	0.463947	0.0318453	-0.0530443	2.3245	2.17746	1.23919	2.19219	1.31995	2.05517	1.28268	1.84798	1.75786	1.49481	2.20793	1.5923	1.37634	2.15345	3.42763	3.49715	3.48264
APOL6	3.5866	4.99636	3.82166	4.67851	5.03643	5.02535	4.75047	5.11923	5.37957	4.77475	4.62384	4.68975	6.6723	4.04794	5.25632	4.76921	4.08905	5.59908	4.92501	4.99072	5.52077	5.11659	5.18323	4.69228	5.63867	4.34973	4.38024	4.38151	4.21398	4.01254	4.87329	4.26494	4.57585	4.25313	5.11993	3.96274	3.61978	4.8192	4.94879	5.04762	3.72463	4.15923	4.57454	4.03129	4.34515	4.61961	4.05593	4.4714	5.99144
APOLD1	7.28306	8.23893	8.02909	8.3459	7.92634	8.32524	7.92835	8.00487	7.52008	8.47554	8.05512	8.03923	7.35752	8.30699	8.26216	8.07487	7.68759	7.8508	8.13888	7.96632	7.7819	7.9069	7.9448	8.09542	8.25408	7.4505	8.41169	8.03315	8.30404	7.89082	7.63235	7.56633	9.23667	8.41778	8.08328	7.76531	8.42201	8.05352	8.28821	8.24735	8.31935	7.75024	8.00158	7.47417	8.2771	7.99207	8.32626	8.0684	7.67632
APOM	5.04916	5.00643	5.0488	4.94879	4.18478	4.70677	5.06585	4.73735	4.18579	4.88284	4.96033	5.74033	5.3756	5.26833	4.56818	5.52112	5.60044	5.25932	3.15803	4.28772	4.89635	4.50918	3.19719	5.59878	3.76344	5.82263	5.11174	4.11923	5.91129	4.44971	5.0722	4.93671	4.55765	4.51178	4.8857	4.97942	4.60658	4.13444	5.23918	5.15228	5.42447	5.23228	5.28239	4.39209	4.84351	4.84876	4.11558	5.04571	4.08546
APOO	9.41629	9.34745	9.76408	9.45515	9.22195	9.63919	9.65526	9.78187	9.46214	9.19028	9.47489	9.2633	9.20955	9.642	9.49996	9.44543	9.35201	9.78486	9.59733	9.10171	9.33412	9.62611	9.88267	9.50519	9.37307	9.49751	9.29887	9.45277	9.40621	9.45515	9.60734	9.72034	8.47011	9.08874	9.52135	9.74477	9.60504	9.22381	9.31361	9.58458	9.2949	9.23269	9.054	9.194	9.47489	9.95831	8.52105	9.46214	9.01818
APOOL	7.65447	7.49109	7.34327	7.97564	7.42228	7.86158	7.8454	8.19234	7.62731	7.65108	8.14557	7.87663	7.78665	7.68759	7.41225	7.7845	7.28835	8.07649	7.48412	7.67698	7.28258	7.78665	7.45892	7.47308	7.12505	7.67496	7.84052	7.33607	7.63877	7.55291	7.92035	7.61615	7.29091	7.31834	8.10298	7.68507	7.96243	7.76596	7.93292	7.39525	7.8079	7.6143	7.75996	7.4087	8.0667	7.76066	6.96585	7.6229	7.12182
APOPT1	6.73541	6.97478	6.52427	6.83537	6.82445	6.79554	6.93327	6.71825	6.9035	6.9035	6.43924	6.38792	6.45047	6.49249	7.02155	6.60666	6.88062	6.87975	6.64964	7.06362	6.5964	7.08887	6.68162	6.72077	6.76347	6.74484	6.65361	6.98757	6.61485	6.87306	6.80859	6.97374	6.36029	6.89869	6.76565	6.86477	6.87622	6.9494	6.78798	6.18689	6.73719	6.69	6.55777	6.1858	6.63286	6.83753	6.94031	6.82322	6.34414
APP	9.642	9.37048	9.06544	9.14184	9.43593	9.11502	9.43862	9.29011	9.39886	9.02814	9.01298	8.71475	9.40381	9.2716	9.194	9.16661	9.25931	9.0299	9.21994	9.26526	9.29887	9.13673	9.31361	9.31361	9.16661	8.62639	8.86529	9.41908	9.20955	9.07098	9.15897	9.19028	8.54648	9.44098	8.77275	9.33224	8.31583	9.27411	8.61587	9.6205	8.39423	9.62892	8.71733	9.65253	8.3309	9.41109	9.64983	8.63645	8.96696
APPBP2	5.89533	6.10628	5.84873	5.92882	6.19808	5.9385	6.41026	6.06192	5.97338	6.10382	5.81399	6.20314	6.28371	6.15379	5.70656	6.003	5.99144	5.88533	5.71583	5.95425	6.36407	5.94145	5.91498	6.10778	5.72257	6.0135	5.87744	5.78277	6.18071	6.02157	5.61432	5.89262	6.21596	6.28756	5.83863	6.09399	5.98642	5.64963	6.08975	6.19341	5.78313	6.28604	6.05634	5.84161	5.90737	6.00018	5.42132	6.10166	5.94323
APPL1	7.91958	7.30673	7.41629	7.93765	7.76463	7.73578	7.89168	7.3422	7.57728	7.76138	7.7006	7.5598	7.72113	7.10371	7.15124	6.87975	7.39775	7.6569	7.6007	7.09362	7.81548	6.90953	7.39525	7.17697	7.14061	7.54443	7.31473	7.08053	6.89213	7.05998	7.24904	7.37963	7.43337	7.83261	7.28882	7.76666	7.89669	7.88994	7.68759	7.38863	7.58294	7.87171	7.71026	7.61735	7.66205	7.49933	8.07157	7.42349	6.95672
APPL2	5.14219	5.44916	4.9825	5.21112	5.71758	4.85041	5.75152	5.92627	4.81183	5.47152	5.42447	5.56105	4.54851	4.72589	4.64013	5.54198	5.74382	5.53302	5.40224	5.26861	4.80075	5.42447	5.25506	4.85565	4.89754	5.52363	5.69146	5.67545	4.59501	5.24974	5.12694	5.24709	5.79048	5.95232	5.98678	5.63018	6.09662	5.97125	5.86144	5.36346	5.87033	6.00884	5.92776	5.61325	5.64642	5.5593	5.50196	5.28815	5.60487
APRT	5.99921	5.82333	6.46506	6.22636	5.50384	6.27015	6.24715	6.03458	6.27844	6.28941	5.37714	6.21162	5.63229	6.71741	7.0792	6.39589	6.46867	6.03025	6.48889	6.39014	6.33213	5.77885	5.93455	6.18457	6.98515	6.90005	5.84941	6.11483	6.82568	6.65615	6.30494	5.74309	5.8372	5.6573	5.94803	5.60125	6.31655	5.95459	5.85814	6.32408	6.19045	5.1645	5.55964	6.02736	6.1523	5.87646	7.32106	5.75673	5.63327
APTX	5.20929	5.29308	5.18078	5.52902	5.91167	5.60228	5.95055	6.04617	5.44625	5.7852	5.39613	5.326	5.68716	5.67877	4.96666	5.79842	5.29932	5.75567	5.40335	5.98921	5.56105	5.60451	5.43719	5.84231	5.52039	5.56966	5.84052	5.7413	6.08067	5.79078	5.3234	5.42307	5.6172	5.74277	5.71758	5.69209	5.90579	5.69174	6.00188	5.51193	6.11975	5.9095	5.69342	5.65061	5.84123	5.54465	6.01755	5.84191	5.47654
AQP1	7.99527	9.12032	8.66349	8.75529	8.67214	8.02217	8.15068	8.57905	8.31485	9.30704	9.01494	8.70127	7.89902	8.3061	8.36325	8.46811	9.08117	8.31848	8.57212	9.08698	9.12032	8.78248	9.19646	8.01484	8.21475	8.68391	8.88638	8.26763	8.62377	8.67214	8.66349	8.48751	8.62234	9.05063	7.98968	8.19144	8.41684	8.64915	8.55712	8.874	8.21004	8.64761	9.22195	9.60009	7.69109	8.09542	8.39207	8.40156	8.72951
AQP10	1.31231	1.28506	1.3696	1.36227	1.32095	1.31567	1.31615	1.33546	0.683732	1.4975	2.96017	1.50691	1.539	0.242291	-0.0153482	3.09927	0.892713	0.767346	0.16258	1.06206	1.22471	3.88037	4.99032	0.905489	3.04823	1.01062	2.76844	0.529792	0.0979918	0.767346	0.368559	1.23647	0.99417	3.47435	2.57078	3.65583	1.59472	2.60121	2.02994	3.90701	1.45393	2.32933	1.41046	3.28889	3.69706	-0.740993	2.44523	3.42442	0.944506
AQP11	1.90717	1.85906	1.95199	1.97788	1.87735	1.87522	1.86626	1.89597	0.109816	1.58261	1.72201	0.834851	0.481541	1.49861	0.033705	0.820752	0.254062	0.915657	2.29043	1.73343	1.45496	2.8986	2.93445	1.52632	0.0755663	1.37634	2.42291	1.62271	0.380463	3.03616	1.63839	3.02284	1.93987	1.91871	2.26211	2.1144	1.90324	1.75367	1.7084	1.78657	1.64133	1.64986	1.72258	1.68008	0.175492	2.05315	0.912975	1.28209	1.5691
AQP2	3.6492	2.61517	4.39123	3.31398	4.33585	2.5835	3.7089	1.17698	3.95664	3.61358	3.33664	3.27022	4.2829	1.49646	3.84524	3.3372	3.48892	3.56948	3.00796	3.07202	2.39501	2.31341	4.35103	3.22295	2.69437	3.46609	3.35118	4.62259	3.80475	5.30279	3.70531	2.67937	2.39501	4.21216	1.89439	2.8932	2.69336	4.88175	2.33186	3.12368	1.86408	4.06642	1.66735	4.07715	3.75408	4.22571	2.85099	3.48429	2.72408
AQP3	5.18762	5.9338	5.35416	6.61017	6.97478	6.618	5.91498	5.93665	6.87841	5.94363	6.92381	6.79073	5.52869	6.72077	6.24746	6.08498	4.87739	6.30672	6.02559	6.00957	6.16169	7.16462	5.4443	6.64845	6.73223	7.37713	4.97786	5.00277	6.80776	6.28641	6.77228	6.0818	5.28545	5.41848	5.12537	5.30506	6.90268	6.28371	4.62128	4.82163	6.06626	5.69002	4.0606	4.19543	6.19231	6.17862	4.87251	5.76605	6.25853
AQP4	4.58986	5.72074	5.30136	6.20249	6.0894	5.52179	5.52112	6.48699	4.65775	3.00297	6.10666	3.62152	3.49119	4.64013	5.86008	3.20497	5.33466	5.18443	3.41167	5.54686	5.30985	5.31484	6.32287	4.30087	5.17025	4.52675	4.23142	5.14963	4.93109	6.20868	4.41803	6.98661	1.44734	3.92764	4.69978	3.78883	4.68055	5.89056	5.22446	4.59195	4.31647	1.18235	5.93591	3.55118	1.42185	3.12368	5.33239	3.86081	4.08087
AQP5	1.71902	1.67755	1.76772	1.77719	1.70604	1.7084	1.70604	1.72258	1.02184	1.06631	0.764614	0.896426	-0.0645967	0.825577	0.990127	1.435	3.18234	0.903099	0.259705	1.2472	2.60666	1.4975	1.48895	1.59407	1.75302	1.06631	2.14889	2.01705	2.01612	2.48654	2.7709	2.50294	1.04334	0.763619	0.173358	2.32082	0.945907	2.73803	1.55918	0.965563	2.84193	1.48415	0.646399	1.38967	1.61698	1.95437	2.35695	0.262697	0.395111
AQP6	0.15298	0.131626	0.15764	0.169861	0.158918	0.160169	0.150803	0.153998	4.96988	4.75784	4.6157	4.72042	4.51214	4.49985	2.65419	3.67658	4.3022	4.26963	4.45686	4.91754	1.54714	3.72251	4.19414	3.37175	4.3685	0.233644	0.0174932	0.392025	0.534869	0.784163	0.0174932	0.0651668	3.24839	2.58821	4.81721	4.3022	5.25797	2.60666	4.05364	4.27231	3.87067	4.31052	3.86319	1.89361	4.8337	3.26083	4.99403	4.67382	4.46435
AQP8	1.20435	1.17843	1.25995	1.26049	1.21329	1.21858	1.22266	1.69444	1.26634	1.22975	0.570095	0.824176	0.70687	1.3	0.714015	0.923813	1.73564	0.32281	3.70012	1.6858	1.11427	0.455522	1.53014	0.358474	1.6637	0.507015	1.95268	1.59345	1.1841	1.46298	1.539	1.71014	1.09694	0.869695	0.348936	0.957005	1.0426	1.34007	0.491092	0.32281	0.805254	0.240313	0.917759	1.79358	0.265505	1.3128	0.948044	0.717108	0.115437
AQP9	0.708856	0.620975	1.97213	0.739779	3.02726	4.22021	4.62259	4.04847	4.05685	0.678232	1.63557	0.948044	3.80771	2.80274	1.88518	1.56148	3.14934	-0.359414	1.85134	3.47039	1.89	3.19294	5.29932	1.88924	4.26915	1.43882	-0.0390256	4.0969	3.85277	0.374236	1.81131	3.15803	4.0145	0.257081	0.646399	1.51967	4.46863	3.00029	4.59158	4.01546	0.86671	1.29332	-0.0362428	-0.0333132	1.16192	1.32844	1.17526	1.11184	5.35565
AQR	4.91293	5.04916	5.10947	4.94421	5.0557	5.10875	4.99951	5.22741	5.19236	5.21751	5.10319	5.30717	5.12768	5.29802	5.5283	5.03678	4.8176	5.33827	4.96622	5.32421	5.3126	5.50422	5.21793	5.27164	4.74384	5.04457	4.99323	5.38175	5.30911	5.25506	5.31798	5.33574	5.68201	5.31866	5.37881	5.06745	5.52039	5.13794	5.44545	5.35049	5.17883	5.27523	5.24709	4.9774	5.40414	5.22014	5.09305	5.42733	5.63734
AR	6.35341	6.65657	6.93289	7.23589	6.73928	6.78418	6.83537	6.31248	6.57934	6.57696	6.01755	6.87796	7.67044	7.03859	6.78218	6.47766	6.55339	6.56716	6.00996	7.33371	6.91629	7.41338	7.41225	6.60486	6.10286	6.30383	6.98804	6.81724	6.91241	6.46959	6.61527	7.22622	6.58411	6.27056	6.87039	6.03981	6.46434	6.30079	6.85088	6.02699	7.21024	6.77429	6.77071	7.03149	6.5679	6.45558	6.41353	6.9631	5.82405
ARAF	5.53017	6.37371	6.38094	6.34495	6.15265	6.57653	6.35062	6.14541	7.1192	6.76733	6.51158	7.1223	6.57392	6.27658	7.18768	6.61274	6.53728	6.41168	6.78129	6.01429	6.20391	6.76565	6.51839	6.02876	6.98661	7.16756	6.49815	5.93235	6.54587	6.38557	6.63805	6.66451	5.67107	6.46867	6.31477	6.26943	6.41237	6.81325	5.81548	5.84694	6.55777	6.27572	6.09919	6.45466	6.20903	6.64925	5.90234	6.27165	5.62709
ARAP1	5.04054	5.56253	5.80742	5.14219	5.13414	5.161	5.23706	5.14694	5.25632	5.27852	5.9378	5.41996	5.17657	4.29959	5.36484	4.94207	5.16526	5.27816	5.83902	5.30717	5.32925	5.35943	5.58782	5.38835	5.10358	5.29048	5.82473	5.7019	5.06858	5.66548	5.65943	4.73098	5.36451	6.05493	5.27972	5.81646	5.34493	5.46854	5.51585	6.24227	5.44952	5.90505	5.6619	5.72736	5.29609	5.90737	5.28122	5.24221	6.67143
ARAP2	3.37688	4.17396	2.99203	3.77667	2.87605	4.49182	4.57414	4.64787	4.01254	3.58111	3.67174	3.21605	4.23802	3.95184	4.31476	2.93936	2.74232	4.4093	4.393	3.57468	3.16094	3.9471	3.66784	4.93001	4.76628	3.68449	2.84803	3.59619	3.06676	2.26689	3.96652	3.12684	3.57526	3.04556	4.41754	2.93056	3.73497	3.82108	3.91277	3.71631	3.03318	3.50201	2.13337	3.26209	4.254	4.17152	3.125	3.62597	6.19701
ARAP3	5.53986	5.86547	5.52327	5.73067	5.68679	5.75835	5.47722	5.52439	5.60661	5.27164	5.11958	5.2057	5.0421	5.61325	4.99403	5.37121	5.11367	5.31759	5.43286	5.43719	4.93153	5.46268	4.82964	5.24563	5.14464	5.29123	5.14694	5.82902	5.87445	4.82119	6.00542	5.58709	5.93814	5.84806	6.27535	5.95275	5.61249	5.18525	5.67579	5.24409	5.233	5.3516	5.61756	5.8537	5.75909	5.66132	6.18345	5.49353	4.86752
ARC	0.15298	0.131626	0.15764	0.169861	0.158918	0.160169	0.150803	0.153998	6.40629	6.2055	6.10778	6.23254	5.87713	3.40288	4.99839	1.12131	1.32577	1.09628	1.72689	1.0645	1.63557	1.53014	1.85134	2.26575	2.95405	0.151978	-0.121723	0.214867	1.23757	0.703802	0.814386	-0.11631	4.20122	2.65419	2.36683	2.06439	2.31471	2.00505	1.10177	2.00769	2.53552	1.78977	1.61983	1.1818	4.4383	2.57475	6.57192	5.89089	5.96146
ARCN1	7.95552	8.09389	8.23425	8.24163	8.49889	8.58028	8.43366	8.61587	8.59423	8.27888	8.05017	8.18035	8.44807	8.34279	8.63032	8.06501	7.98263	8.10298	8.04787	8.39105	8.33001	8.35824	8.91286	8.36725	8.46704	8.04635	8.33608	8.46704	8.07066	7.84407	8.42531	8.05913	7.90477	8.09694	7.98343	8.49195	8.10468	8.15068	8.41467	8.25501	8.08144	8.50005	8.1264	8.09461	8.30786	8.13706	8.38097	7.93915	8.2334
AREG	4.48501	1.93604	4.00118	5.11136	4.42034	4.94587	5.04092	4.19414	2.55572	7.94693	2.2057	3.51527	3.3372	5.44324	4.28907	3.55562	-0.0129858	4.81956	3.17492	6.13733	5.81717	4.45282	4.40617	2.71044	3.49561	3.1977	3.80681	6.55339	6.36293	3.59678	5.00403	5.48546	4.26963	3.85478	2.66107	3.85584	3.07202	3.6683	1.87071	2.75388	3.47697	2.35342	3.43336	4.96161	3.10646	2.73721	1.93604	3.73604	3.64765
ARF1	2.40841	2.29283	2.38947	2.4516	2.34076	2.39402	2.34791	2.34445	1.86696	1.80728	1.86479	1.63497	1.51803	2.64545	3.59568	1.67336	1.95518	2.37014	4.0308	1.75244	1.84136	1.65778	2.92399	1.50977	2.0753	3.04357	2.86712	2.66375	3.31343	1.86853	3.11389	3.13483	3.7089	1.62393	1.66912	1.71255	1.4926	1.32891	2.22254	1.85972	3.56582	1.96486	3.35516	1.26913	2.3308	1.72149	2.76398	2.37014	2.25151
ARF3	6.9622	6.86701	7.2772	6.69814	7.13651	6.87708	6.56178	7.00561	7.54443	7.38702	7.36086	7.16856	7.73647	7.52558	7.12505	7.87026	6.82232	7.1266	7.40987	7.72323	7.18151	7.3858	7.22158	7.45606	7.53406	7.11369	6.79994	7.61482	7.32205	7.04434	7.25341	6.78978	7.14061	6.95364	7.09127	6.96355	7.02614	6.84267	7.01908	7.74676	6.95077	7.38809	6.85761	7.00423	7.71352	7.35362	7.91958	6.67841	7.96871
ARF4	9.21994	8.72951	9.22381	9.25931	9.48485	9.20088	9.16489	9.0559	9.44304	9.06357	9.52858	9.34745	9.78187	9.45981	9.44543	9.03639	9.06911	8.99158	9.47726	9.37048	9.80495	9.0316	9.61201	9.0349	9.44304	9.16489	8.81755	9.60248	9.52135	8.9898	9.50264	8.99872	9.49212	9.4645	9.2411	9.78962	9.17817	9.10369	8.7974	9.55869	9.13513	9.44781	8.91451	9.09617	8.9354	9.31591	9.04161	9.46699	9.81679
ARF5	6.04317	6.64528	5.82695	6.6857	6.0818	6.82232	6.47517	6.30823	7.09644	7.56273	5.58045	6.90522	5.24936	6.47831	7.22003	6.12011	6.35382	6.89301	5.56324	6.24925	6.63374	5.89019	6.49494	6.06962	5.09467	6.2013	5.43937	6.02804	7.48938	6.42261	6.63576	6.09772	5.62823	6.53812	6.0328	6.74888	5.9989	6.8775	6.02085	6.67352	6.27461	6.52123	5.80782	6.6852	6.53768	6.46434	7.10175	5.97951	6.33474
ARF6	7.64297	7.36549	7.22975	7.17058	7.73845	7.52244	7.25616	7.51163	7.26591	6.96176	7.56633	7.29321	7.73911	7.02862	7.54978	7.04669	7.44475	7.42799	7.50444	7.62608	7.40987	7.45953	6.94758	7.36715	7.36491	6.86114	6.72316	7.66522	7.07552	6.48657	7.04573	6.885	7.59268	6.92759	6.51607	6.8056	6.67963	6.8414	7.07456	6.86567	7.09036	6.81026	6.87518	6.50016	6.83083	6.76004	6.58706	7.07734	7.76264
ARFGAP1	4.61222	5.08955	4.8337	4.85895	4.50699	4.20122	4.37128	4.78868	5.03023	4.97107	4.35763	4.66448	4.69714	4.8082	5.38835	4.64361	5.18237	4.92382	5.43894	4.60027	4.30619	4.33848	3.27143	4.52947	5.65978	5.04495	4.68142	4.89995	5.381	4.41313	4.97107	4.40802	4.68229	5.41585	4.6844	5.34673	4.72429	5.4207	4.71634	5.13715	5.23153	4.67682	4.99032	5.0421	5.24523	5.41354	5.99744	4.55718	4.47877
ARFGAP2	5.78935	6.17649	5.53017	6.21089	6.37771	6.24337	6.41722	6.12435	6.59417	7.30567	6.71103	6.04906	6.2138	6.51607	5.79728	6.48612	7.07456	6.72479	6.46506	6.02559	5.86699	5.83683	6.12583	6.3694	5.61432	6.14499	6.7279	6.59058	6.57766	6.72036	6.36782	6.48495	6.47904	6.69422	6.75266	6.36669	6.56508	6.29501	6.38173	6.4818	6.63725	6.70386	6.74752	7.02811	6.87622	6.43652	7.02249	6.58978	5.92882
ARFGAP3	7.94951	7.69939	6.76821	7.4942	7.82692	7.27571	7.22105	7.05049	8.11709	7.39721	7.34271	7.62418	8.23972	7.88125	7.97869	7.18319	7.31473	7.27233	7.59831	7.75094	7.69939	8.00412	7.74256	7.66851	7.52368	7.4776	6.65483	7.96382	7.90918	7.06319	7.77465	7.15017	7.2127	7.26795	7.01533	7.28619	7.14768	6.68611	7.108	7.10845	7.25071	6.92759	7.02296	6.82492	6.70763	6.56178	7.05236	6.94622	7.07412
ARFGEF1	6.99747	7.02614	6.47766	7.04721	7.19371	7.05367	7.35472	7.29639	6.95672	6.98332	6.49494	6.65528	6.57891	6.69505	6.80948	6.80439	7.41054	7.06047	6.69767	6.54105	6.74069	6.65405	7.23173	6.61402	6.77113	6.34454	6.6599	6.92611	6.40745	7.11527	7.25173	6.4818	6.7376	6.60209	6.9838	6.61108	6.76773	6.55105	6.86657	6.37614	6.67435	6.46506	6.54067	6.38212	7.00927	6.78593	6.74888	6.92338	6.89736
ARFGEF2	6.87442	6.6739	6.34077	6.90177	6.7122	6.67629	7.04087	6.64925	7.03295	6.50731	6.8775	6.77305	7.1192	5.98465	5.85405	6.69046	6.88151	6.85088	6.88274	6.54025	6.82232	6.68077	6.76436	6.69931	6.22597	6.63328	6.9847	7.02614	6.5005	6.67435	6.7981	7.21122	6.62928	6.79239	6.95364	6.80817	6.85326	6.82399	7.21636	6.78978	6.83167	6.87975	7.09981	6.75506	6.79073	6.86207	6.27015	6.84051	6.21089
ARFIP1	7.03905	6.71606	6.25228	6.79994	6.95902	7.01344	6.63764	6.60486	6.31896	6.89213	7.1716	6.81026	7.12805	6.87975	7.15557	6.1858	6.77113	6.76949	6.67714	6.57812	7.38309	6.51607	6.8345	6.8431	6.90908	6.41353	6.77698	6.69636	7.01721	6.87841	6.8345	6.6723	6.85633	6.92425	6.2803	7.20273	6.94849	7.44475	6.98661	7.59767	6.42976	7.26992	6.58086	7.16907	6.72443	6.67435	6.65528	6.88846	7.53539
ARFIP2	5.44545	5.28206	6.61931	5.53924	5.3431	5.65094	4.95869	5.27642	6.42673	5.38175	5.11057	5.64047	5.87854	6.59135	5.29416	6.14577	5.53093	5.81259	5.88951	5.15483	4.91428	5.57843	5.99221	5.78703	5.4869	6.91002	5.30946	5.77782	5.88466	5.4568	6.01987	5.48948	5.24748	5.77053	5.33504	5.65618	5.09347	5.32853	4.46523	5.30469	4.16297	6.02157	4.68311	5.96732	5.17274	5.82902	6.93819	4.94164	5.29641
ARFRP1	4.5815	5.16798	5.13035	5.51082	5.22409	5.53453	5.69743	5.30506	6.11233	5.5502	5.37229	5.23507	5.48329	5.79115	6.01755	5.68128	5.33072	5.93271	5.77088	5.27715	5.03067	4.73139	4.86288	5.24101	5.57916	5.98921	5.92219	5.57006	5.54236	5.65094	5.24675	5.56216	5.54318	5.4234	5.72444	5.98427	5.78841	5.73137	5.43576	5.62823	5.57512	5.82026	5.77016	5.96081	5.44393	5.92954	5.84978	5.31598	5.20964
ARG1	1.80923	1.10686	2.40233	3.0321	3.28672	2.29157	2.34445	2.2057	1.4975	3.43172	1.04458	1.54184	1.78721	1.84014	2.37887	0.797123	1.58716	0.171132	1.2911	2.12893	0.293945	1.84068	1.47022	2.24675	4.02091	3.00224	0.991573	1.37574	1.4942	1.22591	1.09188	1.34007	1.92675	1.43716	2.32082	3.12916	1.53394	1.94338	1.50926	1.72321	1.54868	1.15951	1.18	1.15126	1.15423	2.24198	1.40879	1.55134	1.77905
ARG2	5.75298	5.2567	5.65061	6.19701	6.46707	5.90808	5.75533	5.87887	5.07323	6.52665	4.82276	5.33397	5.18722	5.61075	3.82899	5.96732	4.75368	5.24851	5.48194	6.30272	5.5913	6.22359	5.38503	5.75336	6.14758	5.87679	4.84232	6.24192	5.76538	5.06384	6.39965	5.35195	4.42462	4.18346	5.76246	5.8758	5.02272	4.38766	5.59585	4.50699	5.47111	5.3315	4.92662	4.85936	5.76317	5.58114	5.10544	6.17862	5.20643
ARGLU1	7.58856	8.00323	7.42458	7.07261	7.69625	7.37298	7.26591	7.05191	7.00423	7.39831	6.8913	6.66744	6.36215	7.41846	7.07162	7.45359	6.62228	7.17592	6.82911	7.68429	6.46959	7.54616	7.14267	7.07828	6.7559	6.38598	7.60519	6.8708	6.78301	6.76088	6.78129	6.52202	8.21183	6.9801	7.63499	6.85588	7.37298	7.16553	7.50506	6.92381	7.83034	7.10939	7.83178	6.77228	7.27079	6.68162	8.45058	7.02472	7.40746
ARHGAP1	7.86361	7.85155	7.25722	7.73176	7.93915	8.01971	7.50818	7.88197	7.79228	7.45244	7.58605	7.54164	7.97947	7.90546	7.26742	8.03993	7.33717	7.81771	7.32697	7.79094	7.25288	7.64124	7.16553	7.9448	7.59709	8.20338	8.27326	7.25071	7.65447	7.9913	7.1127	7.8952	8.59077	8.61975	8.50211	8.26397	7.8053	7.86717	8.23513	8.07916	8.31583	8.28902	8.30128	8.26216	8.12957	8.02053	8.41879	8.35723	7.15854
ARHGAP10	6.6239	7.43288	6.608	6.89736	7.0403	6.94805	6.94989	7.41338	6.07295	6.79371	6.22138	7.25341	6.42784	6.33099	6.0428	7.108	6.45791	6.76135	6.608	7.12505	6.60845	6.7047	6.19597	6.83934	6.5081	6.84749	7.35043	6.71825	6.21557	7.08936	6.27132	7.52688	7.39998	7.04336	7.39134	7.06047	7.62418	7.46853	7.43337	6.76302	7.6092	7.39658	7.41738	7.3858	7.27835	6.95032	7.47141	6.96447	6.56422
ARHGAP11A	3.80271	2.77652	0.845128	3.233	0.779831	2.93365	0.790506	2.28412	0.194539	1.00713	0.70274	0.802735	0.790506	1.58716	0.216476	1.63097	-0.0333132	2.49987	0.0103481	1.06151	-0.0390256	2.57859	1.60661	0.586175	2.69142	1.46298	0.698704	0.962802	0.866006	1.09694	1.10225	1.50563	2.40841	2.21143	0.606317	1.76772	2.87994	1.10459	1.4975	-0.111247	-0.144427	2.95405	2.29861	1.71678	0.521237	3.01276	1.41316	0.962802	1.60893
ARHGAP12	7.25774	6.5562	6.44297	6.70068	6.23588	6.69464	7.05191	6.87975	6.11939	6.25028	6.5196	6.82363	6.53655	6.09047	5.87401	6.5993	6.4818	6.82911	7.05765	6.5231	6.19045	6.18486	6.36372	6.9266	6.40555	6.25455	6.21089	6.70804	6.12011	6.73179	6.63725	6.7522	6.92796	6.61017	6.05243	6.62351	6.91629	6.13544	6.80991	6.79027	6.55429	6.5133	6.37057	6.4453	7.15507	6.5964	6.66076	7.07104	6.56954
ARHGAP17	6.91629	7.62045	6.83359	6.46434	6.74579	7.46972	7.12318	7.07358	6.01209	7.0047	6.22026	6.66938	7.25173	6.30636	6.86158	6.77305	6.57236	6.69636	7.01533	5.52399	6.7056	6.14864	6.76224	5.67841	5.66716	6.01064	7.21322	6.87442	6.72401	6.60976	7.1417	7.30036	6.68792	6.80648	7.02108	7.12606	6.44917	7.07552	6.91375	6.87518	6.80604	6.22853	7.10274	7.36549	6.96718	7.44086	7.24644	6.78257	5.68897
ARHGAP18	5.63478	6.29238	6.32287	5.86222	5.94545	6.45711	6.20096	5.65161	5.44154	5.46541	6.36372	5.77307	6.06441	5.55688	5.40012	6.58253	6.55145	5.53955	5.95088	6.33283	6.5606	5.73137	5.06705	5.81959	6.35688	5.6208	5.73652	5.38537	5.70724	5.3141	5.76767	5.62463	7.04768	6.03945	5.27891	5.92919	5.86297	5.43684	6.21238	6.44342	5.60801	5.57294	6.20613	6.0328	5.47472	5.30104	6.23401	6.04352	7.3422
ARHGAP20	2.33568	4.37491	3.83158	0.947346	3.78624	3.63414	2.36559	2.16213	1.27364	1.67336	1.70604	1.5691	1.9001	4.07147	2.49987	-0.111247	3.65271	3.04696	0.18611	2.92251	2.76226	3.67132	2.56387	3.10431	2.01337	3.05356	3.10786	3.71744	2.86877	3.58764	3.69501	1.62393	1.41473	1.30541	1.84388	0.214396	2.45932	1.3526	3.54272	2.84127	1.28569	1.71615	2.53659	3.58859	2.7277	2.88787	1.95437	2.21014	2.41299
ARHGAP21	7.11779	7.42682	6.57315	7.19371	7.09929	6.84013	7.06406	6.859	6.88943	6.74435	6.81069	6.70068	6.50847	6.15635	6.21512	6.28941	6.83405	6.72358	6.81026	6.41576	6.34731	6.81943	7.08983	7.20025	6.82731	6.20686	7.04768	6.62891	6.69179	6.42934	6.3773	6.54341	7.3389	7.17503	7.24696	6.70103	7.01205	6.77562	6.72401	6.67517	7.22271	7.03905	7.00032	6.52743	7.05714	6.68704	7.64866	6.60666	6.72617
ARHGAP22	3.90474	3.72203	3.48724	1.02184	3.48611	4.10861	4.45238	3.35738	3.09335	3.18541	4.81839	3.07068	2.39298	3.17747	2.33186	3.72298	2.34664	2.95089	3.06736	3.17868	2.76667	1.76518	3.7402	3.39401	3.52266	3.38483	3.14066	1.1648	3.23932	1.74752	3.48892	1.8812	4.40752	2.62852	3.81961	3.10233	2.81813	1.46041	2.92837	3.45634	3.44597	1.653	2.24418	3.84885	3.57165	2.14282	3.64469	1.89439	3.56356
ARHGAP23	5.75435	5.70694	5.6503	5.93235	5.72044	5.80325	5.5272	5.86408	6.36449	6.13544	5.62502	5.18525	5.4912	6.07028	5.81329	5.93271	5.34054	6.14615	5.8516	5.97987	5.4325	5.57765	5.12962	6.10382	6.14541	5.64642	5.81785	5.54236	6.36144	6.12297	6.43652	5.54352	4.8667	4.89361	5.49866	5.51337	5.83468	5.66581	5.6616	5.30877	6.27165	6.00996	5.9604	5.88501	5.63399	5.67952	6.03094	5.74977	5.18877
ARHGAP24	4.74261	5.44045	4.71071	5.3271	5.9604	4.67044	4.71318	5.07763	5.51697	5.3234	5.41585	6.1927	5.31759	5.44261	5.53924	5.76636	6.00188	5.59733	5.72327	5.41317	5.4844	4.70941	4.00741	5.16015	4.76675	4.5639	5.90468	4.97701	4.98022	6.48416	5.23468	6.0135	5.98851	6.03458	6.03555	6.31739	4.9825	5.56253	5.73462	6.09363	6.05939	6.27883	5.9949	5.76508	5.60414	5.88571	6.35218	6.42147	5.1684
ARHGAP25	4.53417	4.48459	5.23153	4.53685	4.74916	4.93077	4.25447	4.64097	4.57545	3.68799	5.12808	4.03931	4.7496	4.73983	3.93004	3.81961	5.42375	5.54124	3.54583	5.18004	4.61694	4.41169	3.73187	5.47584	5.16948	4.07242	4.08762	3.7402	4.19046	2.76398	3.94371	4.01546	4.3527	4.83248	3.58808	4.99951	3.61525	3.32462	4.65617	5.18877	3.91175	4.71238	4.46703	3.91777	3.37175	4.61346	3.86081	4.38508	6.59453
ARHGAP26	5.35271	4.92813	3.06486	4.85775	5.65197	5.80288	5.61107	5.89565	2.61612	4.29692	3.95797	4.23754	2.80763	4.25447	4.52859	4.36039	4.07106	4.02427	3.6512	4.20981	4.42775	3.6588	3.8457	3.37628	2.634	4.07849	6.44848	4.38284	4.77608	4.61267	3.54382	4.35103	3.98185	4.41313	5.33031	4.48172	5.04289	5.14419	5.29679	3.91777	5.22591	5.39048	5.68128	5.29308	5.10656	5.45334	5.81476	4.5975	4.45552
ARHGAP27	1.47227	4.44754	3.88861	1.52294	4.1219	4.78656	4.62691	2.10012	3.41392	2.04155	2.90089	3.46389	2.35695	3.68552	1.3526	3.40288	3.57735	3.73348	4.22571	2.98083	2.10211	4.64787	1.68113	3.64723	2.22705	3.20767	2.87034	3.45129	3.98185	2.0114	2.70874	2.156	1.17176	3.4944	3.4944	1.13959	2.71513	2.42846	1.67755	2.80109	3.90701	2.337	3.10574	1.07623	2.77355	3.79432	2.80109	2.11643	2.80109
ARHGAP28	1.18991	4.10771	1.2472	2.37014	1.19814	1.2027	1.47071	1.56033	0.266393	1.2027	2.60121	1.24606	1.16371	1.41736	0.113813	1.7392	1.653	2.84127	2.98784	2.8559	2.9486	2.45798	2.35228	2.51984	-0.316675	3.89905	3.53371	2.59227	1.21329	1.52912	0.967542	0.979218	1.26708	0.831507	1.59759	2.05707	1.75605	0.302469	2.9373	1.41094	1.11491	2.24675	1.69719	1.6286	1.23391	0.20542	1.33891	0.571939	1.14205
ARHGAP29	6.34534	7.35472	6.72358	6.70884	6.90558	6.90177	6.91629	7.26035	6.83537	6.68611	6.93819	7.04815	6.46434	7.2481	6.99526	6.67435	6.69046	6.919	7.19083	7.06141	6.88458	6.40711	6.64008	7.44475	7.83481	6.44809	6.46664	7.1266	7.32378	6.46581	7.41846	6.77609	7.01772	6.91416	6.84704	6.46867	6.84793	6.57891	6.63286	6.56674	7.09318	6.84532	6.9453	6.41506	6.96764	6.83268	7.16715	6.70517	6.69179
ARHGAP30	3.19226	4.04066	2.42619	4.5053	4.27917	4.3246	3.91777	3.38884	3.74534	3.68896	4.2469	4.47418	4.33988	3.67035	5.05298	4.16242	3.24892	3.30464	4.46991	4.4233	4.11088	3.17982	3.97995	3.26804	5.21828	3.92545	3.11202	3.59783	3.76145	2.75795	3.85377	3.11513	4.2886	3.75274	4.05914	3.90059	3.5474	2.3501	4.59619	4.65976	3.33031	4.22248	3.91326	3.92591	3.26439	4.09904	3.27328	3.59383	6.28334
ARHGAP31	6.56138	5.8046	6.03701	6.74531	6.25104	6.03025	6.29344	6.19231	6.84653	6.34572	5.964	6.07249	6.43279	6.38633	6.2971	5.74033	6.40038	5.90982	6.08975	6.03209	6.67758	6.50376	6.9631	5.81366	6.43488	6.18659	6.16953	6.57653	6.47444	5.68897	6.38094	6.21201	5.37714	5.83754	6.06592	5.99525	5.87324	5.97441	5.82623	6.08211	5.75567	6.00092	6.30079	6.41311	5.75404	6.21479	5.70441	5.60382	6.42561
ARHGAP32	3.17868	3.72934	2.96088	2.99278	3.29865	3.60114	2.72855	1.80923	2.68122	3.60704	2.6736	3.37067	2.79122	1.82037	4.23327	2.7456	3.30996	3.06358	4.05738	3.04481	4.09001	3.26379	3.30996	4.2944	3.77871	2.66107	3.99972	3.74583	3.34243	4.44353	4.32034	4.07575	3.33948	1.98589	3.30405	3.2015	4.35813	1.67215	3.67903	1.9244	3.73546	2.51809	3.00297	3.67088	3.0822	3.105	3.82655	3.58338	3.36899
ARHGAP33	1.81131	1.75844	1.84857	1.87229	1.78527	1.89285	1.78146	3.92457	2.05517	2.04065	1.24336	1.36126	2.53878	1.94939	0.183825	2.39753	0.183825	3.23362	1.83106	2.10211	3.24539	3.50091	0.928802	3.3905	0.245886	2.85506	1.8246	1.49861	2.37755	1.9244	1.41736	2.38703	3.43446	2.66015	2.19558	1.96944	1.58474	2.80604	1.4555	2.00404	3.13614	2.69052	2.70407	2.84422	4.03697	2.95546	3.84177	1.9024	0.977858
ARHGAP35	6.885	6.92931	6.75349	6.62306	6.96672	7.06966	6.77187	7.05765	6.89082	6.49602	6.52165	6.92512	6.88188	6.39253	6.77874	6.53028	6.73267	7.06319	6.47444	6.46034	6.1643	6.55733	6.90135	6.80162	6.74671	6.8207	6.58663	6.96261	6.47766	6.79725	6.83317	6.92122	6.54464	6.4575	6.67992	6.56674	6.41938	6.52865	6.8431	7.00512	6.73841	6.79767	6.79725	6.96042	7.16358	7.0787	6.70068	7.25288	6.48699
ARHGAP36	1.17893	1.15423	1.23705	1.2355	1.18706	1.19474	1.20032	1.21277	0.355729	0.818033	0.329348	0.651264	0.0537319	0.220225	0.988784	0.913584	0.767346	1.40471	1.45128	0.779831	1.3815	0.0154418	0.197018	0.962128	1.61983	1.11491	1.28619	0.654809	0.831507	1.21693	0.689059	0.665227	1.76152	0.932529	1.75426	1.80728	0.0979918	1.00246	0.824176	1.00309	1.03359	0.144825	0.93316	1.22135	0.260655	1.43389	0.824176	0.681378	1.07149
ARHGAP39	4.79672	3.40288	4.37842	2.88787	3.01924	4.58372	3.87986	2.5418	4.43913	4.46349	4.66576	3.26379	3.72101	3.45013	1.39188	3.20721	4.25493	4.07849	3.55273	3.233	3.66297	4.78069	5.10507	4.30487	3.76096	4.10173	3.98956	4.3466	4.92501	4.24517	4.92185	4.28416	4.87033	4.54547	4.8766	3.87421	4.22064	4.55504	4.32874	4.41351	4.66141	4.29001	4.35015	3.73867	3.79687	3.90605	3.8227	4.18866	3.99109
ARHGAP4	1.80266	3.95482	1.84323	1.86332	1.77905	1.77905	1.77467	4.35546	1.91127	2.52506	1.41854	1.06326	2.4809	0.785817	2.56577	0.0594004	2.70781	-0.0390256	2.82301	2.30605	3.83651	2.45064	1.00378	1.76268	3.75744	1.70551	1.39992	1.9001	2.23666	1.42763	2.52601	1.41316	1.19401	1.89678	3.56157	3.53706	1.71729	1.48034	3.2416	2.7709	0.138533	0.228778	1.11558	2.99405	3.27517	1.11614	1.43277	0.868094	4.0919
ARHGAP42	4.5066	3.55562	0.663908	3.36777	4.77475	4.66229	4.30487	4.25118	4.15879	4.18121	4.72799	4.8637	4.28815	3.44056	4.35187	4.34792	2.82137	2.67547	4.3807	4.66268	3.88903	2.24418	3.28285	4.68269	4.29181	3.50743	4.96447	4.04347	4.24517	4.15424	4.32556	4.28772	4.65572	4.32372	4.66749	4.84395	4.04982	3.7964	4.55151	4.62855	3.99545	4.28772	4.09599	1.70775	4.10771	5.31983	3.36669	4.6798	3.92591
ARHGAP44	5.6605	5.4343	5.26619	5.17657	5.17619	5.03895	5.05223	5.08672	5.12537	5.19304	5.62463	5.54608	5.65696	5.36972	4.73182	5.34275	5.54124	5.24066	4.76054	5.03195	4.92926	5.34971	5.20329	5.30279	4.43744	4.92577	5.19822	5.36205	5.13677	5.74242	5.49424	5.55368	5.09152	5.2355	4.99914	4.97144	5.16377	5.49156	4.57806	5.05735	5.41882	4.62771	5.28815	5.37714	4.3364	4.82564	4.83328	5.34861	4.83543
ARHGAP5	6.92168	7.17848	6.55543	7.04183	6.69852	6.62228	7.23533	6.78385	7.11825	6.76565	6.49569	6.95672	7.75855	6.77739	7.04958	6.54867	6.9453	6.88711	6.95364	6.60754	7.15708	7.29374	7.62481	7.05049	6.56097	6.56262	7.14768	7.24696	6.73267	7.11632	7.23688	7.32906	6.28173	6.93773	6.45168	6.95077	6.71432	7.09272	6.93677	6.94487	6.77033	7.24427	6.72749	7.47936	6.67669	7.04815	6.38708	7.2649	6.70841
ARHGAP6	4.56947	5.41507	4.50228	3.71419	4.74302	4.52505	5.06705	4.78483	5.15073	4.22571	5.42132	4.91332	4.31184	4.23373	5.87289	4.48374	5.31056	4.22337	4.3126	4.05493	4.99719	4.31684	5.19049	4.41981	5.3119	4.47085	4.79204	5.07649	5.54985	4.66448	5.44261	4.63763	5.41285	5.41244	4.4431	4.93794	5.26861	5.04644	4.3022	5.1614	4.95759	5.28545	4.51134	4.58321	5.18569	5.15263	3.87217	5.21639	5.42773
ARHGAP9	3.80867	4.41499	4.3527	3.30681	3.61241	4.02046	3.51029	4.09001	5.82801	3.87012	3.85331	4.23418	4.74032	3.47536	3.71582	4.52902	4.83495	4.68565	4.43532	4.91387	5.41244	4.20306	5.05814	4.54284	4.74675	3.9286	3.28169	4.59117	3.57274	2.97672	4.68975	3.44216	4.75738	4.64747	4.00657	4.10492	4.68604	2.28664	4.88811	5.95848	2.92989	4.51254	2.4516	3.94947	3.43765	4.46991	4.60936	4.03843	4.44259
ARHGDIA	4.93709	5.23848	5.27972	4.96161	5.2229	4.88686	4.61097	4.96447	6.55026	5.68897	4.97624	5.0722	4.8619	5.41585	5.99221	5.32994	4.65066	4.48928	4.77608	5.00236	5.57196	5.13532	5.58045	5.1645	6.07328	6.61356	4.6359	5.47472	6.11939	4.64988	5.54608	4.58743	4.87329	5.43719	4.83905	5.41285	4.23327	6.06887	4.48676	5.76179	4.34209	5.92461	4.03129	5.91579	4.8082	6.02377	5.91678	4.44754	5.42626
ARHGDIB	6.32979	6.97186	6.78633	6.62104	6.91288	7.11632	6.54504	7.44141	6.31509	6.53235	7.1203	7.33492	6.95946	6.64208	6.76483	7.5139	7.54385	6.66902	7.43013	7.53717	7.1661	6.62146	7.10129	6.99526	7.90258	7.03525	6.42105	6.33061	6.919	6.59809	6.49088	6.27203	7.85155	7.26035	6.60486	7.03049	7.57664	7.00561	7.76531	8.29104	6.64166	6.73045	7.00699	6.84493	7.47642	7.36549	6.61356	7.07593	8.70526
ARHGDIG	5.08799	2.5418	0.872681	4.05493	2.77283	4.59584	0.823351	0.856648	4.86544	3.44718	3.1157	3.8808	3.49173	4.21845	1.26708	3.72203	0.727993	4.25915	3.85781	4.05963	0.153998	4.27917	1.01611	4.40302	5.76636	5.06056	3.03267	4.98665	1.87735	4.74106	2.82728	5.19986	3.87217	2.95321	4.75454	5.11802	4.17109	4.41078	3.94412	4.4093	3.84474	4.4876	3.59058	4.71873	3.87113	5.16336	4.45015	1.80985	3.84426
ARHGEF1	4.5908	5.73031	4.85255	4.17915	5.37634	4.84683	5.11535	4.80856	4.82412	4.2189	5.67482	4.93671	4.59619	4.35634	5.9604	3.40121	3.96987	4.91626	5.92531	5.48365	4.74916	4.12373	4.46076	6.36293	4.4013	4.75784	4.45503	4.72843	4.96988	4.44086	5.0749	4.59911	6.10739	4.13242	5.40992	4.82078	5.34738	5.58636	4.45904	4.23802	5.44848	5.04407	5.3126	4.9355	5.06783	5.40302	5.68644	4.16575	5.14419
ARHGEF10	5.10984	5.72293	5.83863	5.39898	5.06894	5.36484	5.34597	5.21977	5.50946	5.54085	5.18722	5.18004	5.01465	5.22858	5.41507	5.49424	5.70038	5.74876	5.88291	5.57981	5.49278	5.32853	5.75264	5.20074	5.5382	5.10395	5.45111	5.71412	5.41354	5.96774	5.56893	5.7976	6.03981	5.41435	5.49052	4.8637	5.50871	5.31334	5.72074	5.17697	5.55257	5.012	5.24599	4.95629	5.95232	5.13452	6.17208	5.19197	5.19704
ARHGEF10L	7.02012	6.69767	6.52239	6.5081	6.39124	6.58367	7.02862	6.8253	6.67591	6.48925	6.63127	6.50496	6.19737	6.23658	6.66274	6.79994	6.39438	6.67992	6.71741	6.29125	5.96003	6.43159	6.32907	6.35382	6.58978	6.41205	6.40745	6.67714	6.51879	6.63805	6.39283	7.12942	6.99487	6.96536	6.77649	6.73006	6.9386	6.65698	6.3875	6.58943	6.77831	6.84226	6.62104	6.2849	6.51607	6.42487	7.2127	6.48855	6.23366
ARHGEF11	0.15298	0.131626	0.15764	0.169861	0.158918	0.160169	0.150803	0.153998	6.19987	6.09009	6.51924	6.45593	6.61601	5.85613	5.30169	5.76469	4.60448	6.0135	5.31598	5.51447	4.64493	5.02272	5.00567	5.45227	5.29869	0.811179	0.771996	0.0998539	-0.183949	0.0078426	-0.0181323	0.270554	5.16753	5.4678	5.7299	5.17768	5.68466	5.04326	5.47977	5.31798	5.43894	5.27606	5.57196	5.61968	5.66896	5.0484	6.31283	6.62269	6.56716
ARHGEF12	6.41767	6.25936	5.82583	6.3852	6.32745	6.29501	6.28334	6.14351	6.10382	6.1823	5.91398	5.86008	6.10739	6.85237	6.73886	6.14864	6.00404	6.09876	5.71272	6.10666	6.11975	6.64528	6.38598	6.02491	6.31434	6.32556	6.23478	6.18801	6.09328	6.0328	6.39056	6.49972	6.07183	5.95745	6.18867	5.70152	5.78733	5.81164	6.15379	5.97374	6.15265	5.64848	5.89262	5.61041	6.54795	6.10134	5.94253	6.63493	5.5913
ARHGEF15	5.37881	5.87067	4.99196	5.34129	5.39131	4.6385	5.44118	5.64678	5.67107	5.49571	5.31906	5.50538	4.90506	5.03271	5.73927	5.4678	4.75833	5.23954	5.68128	5.59585	5.06541	5.56639	5.8537	5.85338	5.56675	5.41544	5.54236	5.74415	6.01716	5.23706	5.76508	5.36451	5.31798	5.44582	5.95275	4.15556	5.32744	5.11923	6.02157	5.77646	5.63514	5.55617	5.32529	5.52179	5.69209	6.10562	6.71783	5.34237	4.82564
ARHGEF16	4.65732	4.4233	0.51689	3.57781	4.58062	4.21933	4.87251	4.4057	4.74106	5.166	3.0822	4.42603	4.02987	4.30259	0.173358	3.13872	3.78624	4.98986	1.24279	3.85087	4.75085	4.92185	5.13226	5.1895	4.0186	5.13873	4.32874	4.99032	4.78693	5.78004	6.02122	4.52105	3.55012	4.30443	5.15715	4.69575	4.45375	4.76752	4.79253	4.13808	4.57666	1.97125	4.78186	4.14885	2.77582	2.31713	4.21976	3.39456	2.6953
ARHGEF17	5.72917	6.56216	5.83143	5.43325	6.66115	6.36254	6.49602	6.66076	6.49851	5.27419	6.13472	6.53235	6.2072	6.4233	6.45314	6.31386	4.4017	6.45791	6.0451	6.47864	5.70294	7.14502	5.9989	7.04669	6.08318	6.02224	6.07876	6.32244	6.95498	6.3806	6.77469	6.60128	5.88533	6.31434	6.11857	5.9766	6.54867	6.38292	6.18514	6.01314	6.24606	6.37852	6.42709	5.44464	6.23848	6.00264	6.66571	6.22815	5.25466
ARHGEF18	6.30193	6.27243	6.6449	6.37415	6.68274	6.49331	5.96365	6.29972	6.32091	6.37135	6.12158	6.27165	6.6739	6.50618	6.70607	6.68917	6.42858	6.35805	6.80948	6.61232	6.16727	5.94878	7.14654	6.18551	6.57392	6.10955	5.97873	5.99854	6.37771	5.77743	6.47444	6.17649	6.1587	6.45349	6.57353	6.27806	6.04873	6.00124	6.24855	6.48699	6.23218	6.30933	5.99674	5.88	6.04761	6.29198	6.36449	6.24789	6.2631
ARHGEF19	0.335962	3.54957	4.33585	4.19196	2.49987	4.64747	3.45737	3.56157	4.06209	4.25777	4.61918	3.4411	3.95334	5.04495	5.24974	4.7704	3.40496	4.02807	3.23679	4.84996	3.14259	4.62609	3.23866	4.87977	4.84954	5.13337	3.3695	4.35062	3.89184	5.42593	4.51846	3.37449	4.65895	1.7439	3.30862	2.97015	4.92699	4.80569	4.58597	3.62152	4.70475	3.84123	4.89018	2.88058	4.57626	2.96802	5.51337	3.83445	4.36398
ARHGEF2	6.29932	5.80707	6.06887	5.74347	6.37335	5.83006	5.88501	5.8008	6.09662	4.71833	5.65307	5.72367	6.16244	5.5382	5.51518	5.70724	4.58948	6.17895	6.24337	5.98748	6.2971	5.88987	5.93271	6.33509	6.53193	5.92813	6.54464	5.61143	5.92668	6.01987	6.08245	5.60487	5.57656	6.60325	5.145	5.70797	5.45513	6.13768	5.80979	6.79119	5.55548	6.46305	5.21603	5.89089	6.1549	6.50731	6.36484	5.5502	5.63547
ARHGEF25	3.44433	5.20998	5.0258	4.89635	3.74988	5.17106	5.15153	6.27988	4.52105	3.7999	5.60833	5.30352	4.1403	6.06441	6.0075	6.02768	5.52756	1.74944	5.12217	4.85775	4.46166	5.76573	5.65411	4.49146	6.44617	4.61517	4.82964	5.3814	4.38508	6.2821	4.76009	6.08353	5.21156	5.77421	5.95164	4.7778	1.46527	4.22532	4.48972	5.26766	4.6653	6.14541	4.76462	5.14618	4.9505	5.31158	7.07507	4.99032	4.83128
ARHGEF26	3.21103	4.13002	3.61241	4.98456	4.41169	3.53117	4.48799	4.34033	3.32113	4.60238	4.96666	4.24605	3.64264	3.94032	4.62691	4.37447	4.65936	3.66156	3.57687	3.68552	4.29605	4.1758	3.49611	3.73914	3.09539	4.19327	3.92764	4.08263	4.93191	4.51042	4.41452	3.96788	5.44848	5.15938	4.29774	5.06344	4.28596	4.18209	3.93285	4.13932	4.34973	4.55807	4.34609	4.61517	4.27494	4.18166	4.64827	4.45816	4.28815
ARHGEF3	8.093	7.47308	6.80776	7.12993	6.93289	7.15896	7.0664	7.04573	7.22466	6.55465	6.95629	7.0399	7.47023	7.51945	7.27571	6.70386	6.18514	7.26444	7.19469	7.15896	7.23533	6.79284	6.62848	7.30567	6.6857	6.90268	7.37648	6.32408	6.11087	6.38253	6.88542	6.6239	6.95077	6.68236	6.12989	6.61527	6.29125	6.55777	6.81325	7.20675	6.64925	6.78755	6.49569	6.49569	6.42636	6.74752	6.52701	6.8228	7.07162
ARHGEF37	6.56594	6.41423	6.56262	6.58499	6.42526	6.59058	6.38452	6.35533	6.72964	6.5021	6.41809	6.24227	6.61559	6.22359	6.25104	6.17284	6.35493	6.60006	6.08422	6.31937	6.35651	6.63452	6.40082	6.55777	5.8658	6.14758	6.31587	6.36669	5.92776	6.52743	6.37135	6.47037	5.94842	5.56569	6.62501	5.64707	6.13845	5.56063	6.43896	6.05243	6.17967	5.86144	6.16884	5.81959	6.59135	6.41311	5.96438	6.06592	6.0857
ARHGEF38	0.80109	0.733567	2.60771	4.11923	0.785085	0.814386	2.77283	0.82737	1.54247	1.74686	2.05928	2.00676	2.385	3.98333	-0.272647	0.259705	-0.0730405	0.973545	3.46075	2.7059	0.449292	3.30862	4.38241	3.06358	2.96088	2.87247	3.06864	2.46408	2.33829	2.30362	1.37634	3.08944	2.90232	0.453508	4.09411	4.12543	0.698704	4.65816	3.15061	2.0582	-0.503837	2.75871	1.56972	4.0057	2.72495	3.05563	1.60938	2.73888	1.72388
ARHGEF4	3.43606	0.914151	1.00637	2.87462	4.32157	0.978508	4.10173	4.32506	3.54849	3.16487	1.82249	3.07202	2.4295	3.52059	1.11307	-0.0333132	0.0773448	4.27044	0.934544	4.51086	1.03551	1.47683	0.825577	3.60387	1.74888	1.8332	1.64623	1.23038	0.77722	3.63763	1.02371	2.08062	1.57783	4.31684	1.62053	1.10998	0.982622	2.67741	1.23162	1.1112	3.66984	1.03027	3.84474	1.61404	1.47227	1.66978	1.20086	1.39315	0.169095
ARHGEF40	5.44882	4.97786	5.21424	5.07441	5.04407	4.79337	5.00965	4.71673	5.13378	4.48047	5.45299	5.12183	5.11993	5.12654	4.84395	5.35271	4.98456	5.17968	4.96582	5.28627	5.14579	5.32631	4.94421	5.4707	5.09387	5.19586	4.49936	4.87117	5.50463	5.1645	5.53163	5.00924	5.38835	5.00403	5.00035	4.89058	5.07183	4.45646	4.83784	4.5975	4.98577	4.61779	4.96414	4.60532	5.11457	4.54124	5.2194	5.10912	5.09152
ARHGEF6	8.60829	9.20523	8.87068	8.59304	8.47439	8.72143	8.32424	8.1264	8.09154	8.31387	8.40669	8.23256	8.27048	8.42531	8.37715	8.27326	7.92496	8.6894	8.86379	8.80202	8.62905	8.84708	8.83938	8.54648	8.5041	8.52105	8.51661	8.40976	7.79228	8.4296	7.96243	9.07647	8.42293	8.14557	8.60048	8.34384	8.53056	7.92182	8.55612	8.1697	9.30079	8.69206	8.36932	7.84052	8.84708	8.35465	8.49666	8.90501	8.23615
ARHGEF7	5.43645	5.85647	5.53093	6.05385	5.69415	6.25567	5.88291	6.063	5.49783	5.70694	5.51049	5.64437	5.40012	6.00224	5.67068	6.00053	5.40483	5.67841	5.64402	5.63943	5.41739	5.59585	5.59695	5.57981	5.86335	5.65233	5.57695	6.02768	6.02157	6.22853	5.92996	5.74347	6.3875	6.03316	6.29387	5.5889	5.9338	5.84873	5.80707	5.49866	6.12952	5.65377	6.01538	5.8046	5.49052	5.49194	6.56022	5.6254	5.28502
ARHGEF9	6.2102	6.42858	6.21238	6.11233	6.21992	6.2631	6.38367	6.33247	6.35842	6.67183	6.44147	6.69594	6.29313	6.51765	6.06481	6.65657	6.82322	6.618	6.58499	6.289	5.98095	6.32287	6.28756	6.58749	6.45466	6.57766	6.94166	5.85874	6.22283	6.93153	6.23437	6.97649	6.32907	7.02389	6.72657	6.86034	6.13223	6.50694	6.56262	6.43774	6.74797	7.3422	6.63925	7.27079	6.58253	6.8802	6.12297	7.17105	5.81581
ARID1A	5.67915	6.19987	5.61968	5.89194	5.61432	5.84767	5.59937	5.85051	6.07477	5.81476	5.53234	5.65767	6.50255	5.90093	5.93996	5.7976	5.68427	5.96081	5.74481	5.76508	6.11376	6.46034	6.49532	5.65943	6.08211	6.33934	6.24192	6.12952	5.70038	5.70117	6.09152	5.88466	5.78799	6.33022	5.57695	5.60159	5.99144	6.25822	6.03349	6.37371	6.48969	6.56466	5.82867	6.22138	6.04873	6.28981	6.54504	6.34266	5.42375
ARID1B	6.2303	6.13071	5.70622	6.003	5.87646	5.77538	6.22523	6.01987	5.6824	5.2426	5.34018	5.86111	5.96146	5.20142	5.74448	5.63693	6.33283	5.53888	5.91204	5.18116	5.72444	5.77458	5.49571	5.72736	5.79146	5.23191	5.8036	5.79908	5.58962	5.89464	5.58334	5.97234	5.97558	5.45647	5.59408	4.88137	5.75635	5.53709	5.96217	5.59547	5.66716	5.64815	6.0846	6.00785	5.7519	5.68201	6.18383	5.60125	5.81959
ARID2	5.43613	5.31826	5.34928	5.67579	5.73203	5.73462	5.84014	5.23743	5.34203	5.52756	5.35977	5.46817	5.81366	5.59062	5.58146	5.9422	5.42034	5.57229	5.41882	5.58045	5.33072	5.64886	5.57729	5.25966	5.08522	5.10358	5.15403	5.35347	5.26542	5.22825	5.55866	5.68319	5.65943	5.08871	5.56966	5.2567	5.2859	5.22446	5.31524	5.36095	5.76982	5.07292	5.79323	5.49236	5.03895	5.01585	5.55514	5.81857	5.33648
ARID3A	4.88284	5.20892	4.45772	4.96821	5.54766	4.83784	4.81435	4.6653	5.1731	4.91543	4.82325	4.83824	4.59281	4.88892	5.11659	4.12464	4.74597	4.38151	5.2119	4.71071	5.47722	4.51086	5.25359	4.53033	4.80569	4.34609	4.48295	5.40125	4.55549	4.6798	4.95629	5.01953	4.68975	4.77515	4.74873	4.3833	4.56554	5.15786	4.73983	4.33988	4.57414	4.45858	4.71833	4.7247	5.31866	3.89048	5.00722	4.25361	4.63553
ARID3B	1.72021	1.67813	1.76831	1.77784	5.08601	1.709	1.70662	1.72321	1.26963	0.935171	1.48941	1.79655	1.42234	1.68987	1.36564	1.42651	2.81004	1.23217	1.24781	0.51292	0.64039	2.049	0.937162	1.01547	0.818883	0.75125	1.2472	1.48319	0.626304	0.771053	0.989431	1.02955	2.70205	1.22075	3.26439	0.619647	1.49157	3.05631	1.91441	2.89403	1.48088	1.04522	1.6631	1.37081	0.802735	0.961571	1.18584	1.06392	0.730781
ARID4A	5.8244	6.25786	5.71442	5.42521	5.49156	5.40517	5.72842	5.37881	5.54085	6.04617	5.54465	5.51518	5.54572	6.20064	6.07295	5.17968	5.01677	5.42375	5.27781	5.38029	4.87773	5.52399	5.67415	5.90166	5.17185	5.20218	6.12989	5.64078	5.53635	5.45947	6.29344	5.4678	6.24571	5.5283	5.70441	6.22171	5.93304	5.55476	5.78277	5.40263	6.14864	6.03884	5.76671	5.63979	5.73721	5.44809	6.056	5.50237	5.7008
ARID4B	6.66237	6.61842	6.42858	6.54675	6.83124	6.66362	6.77649	6.51523	6.30047	6.44342	6.14653	6.17284	6.38557	6.15415	6.37501	6.33177	6.51204	6.47081	6.29972	6.33177	6.77698	6.61842	6.58943	6.24822	5.68861	6.16206	6.65778	6.30565	6.04906	6.28293	6.47766	6.32824	6.82157	6.38327	6.45671	6.4425	6.67629	6.35805	6.69594	6.39924	6.80513	6.57766	6.74069	6.53388	6.66115	6.37173	6.80162	6.68274	6.58862
ARID5A	4.91172	3.01924	2.74409	4.75873	5.00519	3.2026	3.98185	2.14647	6.13579	4.5673	4.16921	3.53432	5.67272	4.35229	4.34426	5.00403	5.72552	4.036	4.29774	5.42413	6.06009	6.17687	4.30178	6.40711	6.3542	5.10687	4.53557	6.23848	4.80278	4.5975	6.8358	5.53302	5.84941	5.61432	5.39863	6.08534	3.13614	4.65775	4.53864	6.10666	2.78003	5.64499	4.81348	1.54247	5.6299	1.76578	8.48538	4.79513	3.72718
ARID5B	6.26537	6.40555	5.31906	6.22171	5.83975	5.60599	6.26453	5.65233	5.68351	6.796	5.50615	6.01755	6.9453	6.14864	5.96146	5.91891	5.82867	5.47029	5.1645	7.3777	7.65821	5.97558	6.08028	6.82191	7.11684	6.27919	6.20249	7.2237	6.12583	5.92954	6.95364	5.78105	6.62546	6.14205	6.02309	5.93626	6.12125	6.21512	6.27572	6.4728	6.10102	6.23848	6.19306	6.11594	6.35763	6.38292	6.55465	5.94724	6.67435
ARIH1	7.11732	7.04864	7.05049	7.13454	7.12318	7.3205	7.2042	7.20634	6.82116	6.92842	6.92077	6.87927	7.14911	7.10653	6.84493	6.9324	6.86293	6.99526	6.56555	7.0849	6.95544	7.23481	7.07216	7.03625	6.56306	6.59375	6.98994	7.28306	7.07104	6.95459	7.12556	7.12318	6.88898	6.90862	6.99136	7.09405	6.99037	7.13405	7.37713	7.18924	7.08834	7.17007	7.0112	7.15557	7.04128	7.13101	7.23688	6.98151	6.76088
ARIH2	7.91806	7.20071	7.15369	7.70454	7.57477	7.35586	7.63754	7.1987	7.51628	7.31015	7.36026	7.28882	6.89417	7.70383	7.69881	7.49109	7.99677	7.47882	7.71794	6.82819	6.99526	7.43234	7.43978	7.26344	7.08393	7.34597	7.14911	7.38863	7.39775	7.56814	8.10721	7.52008	7.38759	7.77743	7.4782	7.51273	7.72185	7.72185	7.55464	7.37896	7.10566	7.43337	7.32378	7.4494	7.6143	7.62671	6.9444	7.81894	7.02757
ARL1	8.1104	8.07741	8.16811	8.39947	8.25306	8.16626	8.36228	8.07741	8.32321	8.36415	7.99921	7.78124	8.14381	8.06164	8.15855	8.05431	8.47116	8.01016	8.08918	8.25003	8.42416	7.88639	7.82396	8.34866	8.41169	8.04707	8.13044	8.16186	8.34088	8.11142	7.92569	8.05117	8.1879	8.41684	8.11368	8.4286	8.3098	8.26949	8.03161	8.13456	8.34982	8.38097	8.33408	8.13888	8.03759	8.16031	8.19144	8.11782	7.90112
ARL10	5.34597	4.19144	4.87977	4.84232	4.95382	4.87117	4.68689	4.50956	4.87699	4.61918	4.64279	4.5886	4.71833	4.53947	4.05593	4.8857	4.61309	4.52283	4.71716	4.48211	5.10358	4.61476	4.62609	4.95339	4.17109	3.682	4.78524	4.38945	4.48256	5.13914	4.89995	4.73938	4.69276	4.99032	4.23877	4.39677	4.58948	4.20533	4.55851	3.9394	4.87363	4.35813	4.65269	4.25534	4.76968	4.13639	5.22972	4.62609	4.54079
ARL11	3.78224	3.19834	3.64612	1.18295	2.47049	1.14851	1.15252	1.57138	1.08933	1.51529	1.48319	1.97387	2.72939	1.49317	1.88924	1.71082	1.81202	1.94866	1.55134	1.68697	2.24295	3.18673	2.93517	1.16135	1.45288	1.63954	1.03152	1.0174	1.08756	2.12556	1.15724	0.964951	0.261743	2.24418	2.65532	1.81131	1.61698	-0.144427	1.47988	0.692442	2.99203	2.00676	3.47644	-0.162529	3.14508	-0.201158	0.289031	0.620975	2.91754
ARL13B	4.29001	5.01918	4.45729	4.90473	4.51507	4.50918	3.67337	4.98748	5.01314	5.48911	4.59943	4.42869	4.76009	4.86331	5.34129	4.28643	5.2045	4.37538	5.28858	5.21511	4.85936	4.35946	5.33936	5.04801	5.01354	4.76264	5.29932	5.1656	4.41803	3.48787	4.70152	4.69886	5.10045	4.80121	3.51411	5.20715	4.55319	3.84474	4.14216	4.96494	4.61961	4.42034	4.85093	4.75495	5.53955	3.80867	4.9774	4.49353	4.55151
ARL14	0.877346	1.83814	0.920135	0.908548	2.6868	1.41362	3.36488	2.19672	-0.209615	0.216476	0.207381	0.542657	0.766466	1.22815	1.23326	1.46694	2.72591	0.18611	0.638976	2.72939	0.0537319	2.92628	0.981269	1.66677	0.82488	1.3026	0.869695	0.769212	0.990852	1.17056	0.879657	0.749404	0.678232	0.852895	0.11687	0.928173	1.89844	0.483521	0.0900882	0.782556	0.113813	1.68226	0.200288	0.348936	0.948044	2.54293	1.20554	1.19927	1.06151
ARL15	6.75965	7.47084	6.86744	6.8034	6.99578	7.03905	7.20174	6.59489	7.15462	6.91852	7.38253	7.69042	7.31679	7.1992	6.08211	7.45606	7.39942	7.10083	7.06047	7.03295	6.91495	7.10463	6.52865	7.02472	6.31781	6.84575	7.73773	7.05998	7.2302	6.51119	7.69559	7.21743	7.59947	7.43676	7.10371	6.64369	7.38702	7.20575	7.3493	7.5182	7.61927	7.3819	7.51756	7.16414	7.27992	7.01164	7.33267	6.92842	7.77131
ARL17B	4.41169	5.03767	5.13532	4.72294	4.61346	5.26038	5.72404	5.53093	4.40979	4.82371	4.58498	4.8224	4.55947	5.08399	4.56774	5.02405	4.78734	5.23884	5.07527	5.00805	4.58826	5.25241	5.00195	5.08194	4.05036	4.777	5.29969	4.38686	5.07566	5.3271	4.57666	4.9492	5.73165	5.0602	5.39325	4.86625	5.23005	4.85345	4.92418	4.254	4.76504	4.69886	5.06745	4.63475	5.87067	5.53093	5.80251	4.87773	5.01164
ARL2BP	6.51047	5.99674	6.1505	6.48571	6.10855	6.40002	6.3769	6.36484	7.00615	6.41237	6.86701	6.64572	6.71653	6.94209	7.15267	6.67477	6.74352	6.71257	7.108	6.17934	6.63805	6.65196	7.04522	6.54105	7.16664	6.46305	6.29161	6.80252	7.16715	6.73632	7.08347	6.7791	6.21162	6.54419	6.17895	6.24369	6.62928	6.76988	6.525	6.58131	6.18975	6.54259	6.08211	6.37614	7.30124	7.09929	5.85083	6.70185	6.43724
ARL3	7.29534	7.48218	7.61615	7.42061	7.28882	7.49933	7.50444	7.50444	7.98028	7.76666	7.33214	7.82692	7.22921	7.50765	7.45771	7.28196	8.00487	7.8053	7.90048	7.7405	7.7641	7.64627	7.55525	7.69109	7.70966	7.50444	7.72883	6.99669	7.36491	7.93765	7.16961	7.2772	7.48876	7.41941	7.49827	7.56814	7.39658	7.52368	7.34327	7.44772	7.63434	7.47023	7.77131	7.5687	7.45486	7.05285	7.77678	7.442	7.52558
ARL4A	6.03781	6.4878	-0.201158	6.21512	6.39253	6.04465	6.28823	6.32049	8.93359	5.78703	5.37847	6.08731	7.76066	7.96467	8.42293	5.5573	5.69377	4.92848	5.77421	7.28932	7.09405	7.50165	6.93773	7.37017	6.48736	6.34116	5.54535	7.55525	7.23432	4.72665	9.06911	5.75336	5.49278	5.08799	5.5889	5.08003	4.86625	4.93324	5.59408	6.3652	5.41033	4.84801	4.70233	2.94789	5.87713	5.48911	5.50124	6.54419	5.36417
ARL4C	4.57326	4.8374	3.47943	3.8774	4.81097	4.4383	4.41981	4.61656	4.12543	4.46435	4.79379	4.02184	4.24291	4.96247	4.83328	4.87033	3.45737	4.40802	4.7434	4.66965	4.45904	4.54809	4.81558	5.01164	5.58376	4.59543	3.25392	4.70475	4.63297	4.70394	4.35445	3.56839	4.31987	3.73546	3.87942	3.70996	3.79945	4.1706	4.54773	4.82445	3.22295	3.23418	3.90701	3.0714	4.00294	3.92405	3.98427	3.79125	5.66965
ARL4D	5.30717	4.93077	5.31719	4.91216	5.50759	5.33648	5.15752	5.19542	4.66706	6.28563	5.03562	5.72257	5.26463	5.61506	5.56461	5.09467	4.93671	5.14694	5.44848	5.18645	6.02626	4.89402	5.84806	5.26276	5.69632	4.8345	4.65854	5.76144	5.25466	4.90545	5.67482	5.17146	4.70062	4.60778	4.86586	4.46907	5.51659	4.72628	4.86019	4.79253	5.48654	5.23388	5.40191	4.29824	5.34344	5.2011	5.20929	5.17581	5.59312
ARL5B	6.1747	6.22207	6.26415	6.54105	6.30744	6.26824	6.618	6.21596	6.58411	6.16467	6.62423	6.42487	6.34731	6.79027	7.13853	6.29587	6.41938	6.28251	6.4473	6.16574	6.52622	6.30933	6.12726	6.43652	6.7981	6.11127	6.54182	7.13902	6.54025	5.88918	6.51765	5.88218	6.04836	5.9604	5.68788	6.20613	5.97912	6.00153	6.0641	6.09047	6.08876	6.10416	5.65838	5.69896	5.8516	6.38598	6.21754	6.29161	5.75939
ARL5C	0.457584	3.07974	2.39641	0.501419	4.46123	3.43227	2.98551	3.83063	3.77814	2.56076	4.39036	2.73888	2.56874	1.21592	1.38672	2.27952	1.80664	2.58156	1.52024	1.69206	1.24384	5.74067	4.33937	1.63839	2.24198	2.60666	4.36806	3.80867	3.92725	2.91684	3.96042	4.15464	4.2474	4.65775	1.54588	4.43274	2.34076	1.48689	4.55275	4.28	3.90798	1.81964	1.87971	4.24418	3.03616	3.08283	1.90717	3.35798	2.65314
ARL6	4.64051	4.66921	4.684	4.1725	5.59878	5.37671	5.08601	4.83654	4.30303	5.05607	4.94251	4.77915	5.41775	4.96988	4.65066	3.84841	4.6359	4.76462	4.73816	5.03271	5.18722	5.03601	4.47715	4.65066	4.90159	4.83495	5.52112	4.76221	4.34426	4.48595	4.37582	4.9505	5.00519	5.17389	4.92699	5.12962	5.02862	5.50501	5.03271	5.16987	4.74597	5.39788	5.21977	4.5546	4.63553	4.14532	4.61267	4.91293	5.06177
ARL6IP1	7.89388	8.58028	8.30404	8.09542	8.26107	8.26496	7.99595	8.38097	7.43863	7.64124	8.16897	7.86646	8.25408	7.50934	8.24067	7.45828	8.59933	7.51695	8.74319	7.8289	8.92401	7.58605	8.50649	7.2302	7.93213	7.81268	8.40247	8.11546	7.55162	7.35043	7.82532	7.58236	8.45139	8.48226	8.17402	8.07741	8.2872	8.37715	8.52321	8.70127	7.82324	8.37613	8.77134	8.2771	8.36725	8.36725	8.39741	7.56156	9.01298
ARL6IP4	7.10175	7.58472	7.30567	7.30338	7.32854	7.67698	7.52244	7.24276	7.82958	7.68012	7.44594	7.46379	7.2556	7.55636	7.99527	7.25932	7.94775	8.02288	7.65041	7.47474	7.03577	7.84794	7.15507	7.31248	7.73711	8.03837	7.60782	7.33546	7.88781	7.75298	7.63617	7.41786	7.39942	7.74534	7.35752	7.50934	7.62853	7.74676	7.10274	7.48823	7.68827	7.24019	7.89755	7.32378	7.238	7.37235	8.22777	6.90268	6.97478
ARL6IP5	10.2962	10.3238	9.9157	10.0994	10.1442	10.1575	10.319	10.1118	10.4304	10.3052	10.5006	10.5421	10.7374	9.82898	9.86316	10.5308	10.5073	10.2346	10.2813	10.1575	10.3537	10.2085	10.5237	10.4897	10.5308	10.0102	10.3741	10.3599	10.1118	10.3696	10.0218	10.3011	10.1961	10.0449	9.76408	9.98269	10.0483	9.9157	10.4403	10.2482	10.4046	10.2666	10.4616	10.3893	10.2864	10.0526	9.75567	10.3696	10.384
ARL6IP6	5.77307	5.91746	5.31372	5.37714	5.32777	5.39722	5.6616	4.78271	6.07912	5.54608	5.09857	5.7169	5.96365	4.97022	5.95195	5.36742	6.21596	5.07107	5.60599	5.31021	6.08534	5.12069	6.03422	5.32816	5.91129	5.2045	5.75635	5.27164	5.81959	5.18612	5.88258	5.5977	5.42521	5.75371	5.73759	5.71937	5.74842	5.57804	5.41507	5.7601	5.12149	6.43236	5.39091	5.4266	5.21793	5.95848	5.63654	5.96657	6.42976
ARL8A	8.63032	8.1104	7.90112	8.13044	8.29939	7.7999	8.16715	8.06929	8.59304	7.67108	7.66008	7.13405	8.3098	6.73306	8.17759	7.52805	8.00784	7.9018	8.36325	7.60519	7.92414	5.78004	8.49311	7.54273	8.51775	8.27326	7.23856	8.17325	8.29756	7.63434	8.18688	7.63304	7.38253	7.90546	6.92512	8.07823	7.03442	8.45231	7.46252	7.91806	7.30673	7.90325	7.59884	8.0731	7.52805	8.21738	7.82039	7.52435	7.44772
ARL8B	8.9354	9.23911	9.14184	8.97217	8.99158	9.054	8.95489	8.92233	8.8769	9.08304	8.76992	8.71864	8.86379	9.01959	9.20304	8.88947	8.90362	8.82057	9.04344	8.99158	9.20523	8.91451	9.23667	8.3984	8.76857	8.87547	9.36384	9.2716	8.69491	8.92556	8.96357	9.04344	9.01298	9.14907	9.15495	9.32997	9.00927	9.04161	9.1988	9.21994	9.1333	9.21812	9.038	8.85159	9.1988	9.01298	8.96696	8.97592	8.7974
ARL9	2.5009	3.57229	2.3395	3.12632	0.773064	3.24416	0.521237	3.05496	2.9098	0.773064	1.61818	1.64377	2.45064	0.361515	0.501419	1.94164	1.52808	3.85781	3.94412	5.2119	1.0504	4.03365	1.26852	1.97387	0.438086	1.34652	1.2068	3.06798	1.63954	1.12716	3.22538	1.53175	1.58716	1.58837	1.24279	2.04065	3.50146	1.24606	1.58261	1.72743	1.46362	0.701758	4.67004	3.13184	3.3854	1.22637	1.04132	1.48473	1.72149
ARMC1	7.69625	8.19059	7.55589	7.878	7.7999	7.7489	7.60782	7.59523	7.66713	7.54863	7.80188	7.98811	7.71673	7.77535	7.46664	7.69361	7.76666	7.69305	7.51695	7.8363	8.13706	7.65506	7.63754	7.7999	7.58419	7.68959	7.762	7.71292	7.35204	7.65632	7.3819	8.06418	7.72457	8.05512	7.54918	8.46498	7.68351	8.14723	7.79584	8.03837	7.85721	8.07823	7.72532	7.91575	7.84871	8.22091	7.73021	8.07398	7.52498
ARMC10	6.72115	7.10463	6.88274	7.09318	7.01164	6.61442	7.02342	7.04291	6.60535	6.43814	7.08258	7.0112	7.04434	6.45093	7.14417	7.03525	6.87259	6.48889	6.80859	6.8228	7.21798	6.79947	6.86701	6.84997	6.97325	6.89785	6.6239	7.04908	6.68704	6.67517	6.70924	7.1223	6.58086	7.09783	6.858	7.14868	6.73504	6.89785	6.49532	7.16961	6.87401	7.20071	6.55501	6.79767	7.06406	7.36604	6.81762	7.30952	7.30338
ARMC2	3.3996	3.72353	3.20959	4.00873	1.97894	1.00856	3.8246	4.76137	2.70115	3.53319	1.91794	2.94427	1.72559	0.695523	2.83326	3.46777	3.9408	3.86029	1.44041	3.5999	3.72515	0.128048	0.481541	3.43559	3.64417	1.56446	3.2015	1.57509	1.19636	3.52422	1.25286	2.46845	1.60055	0.672696	2.88435	1.16655	3.36436	4.15339	2.43319	1.82725	2.56874	0.815276	1.29894	1.38032	3.79741	3.47435	1.27632	4.17915	3.72771
ARMC3	1.2027	1.17698	1.25781	1.25875	1.21228	1.21638	1.89202	1.23817	0.129201	0.766466	-0.0606992	1.17116	1.278	0.83222	1.35471	0.57488	0.227609	2.23925	1.64261	0.957714	1.38967	0.252351	2.54989	0.0685046	1.05726	1.1531	0.778938	0.98804	0.869695	1.04077	0.779831	1.26159	0.589046	1.25286	1.42946	1.82523	0.586175	1.76634	0.20334	1.06512	0.510701	0.750443	1.06691	2.37887	1.19474	0.125476	0.201484	1.15252	0.267273
ARMC4	3.15061	3.05293	3.97559	4.01902	2.78802	3.56112	4.15923	3.08343	3.65174	4.66141	3.39698	4.11923	3.78578	3.42217	1.89202	4.2568	4.84311	3.88723	3.59568	1.76455	2.30969	4.22619	4.10586	4.07198	3.56408	3.0497	4.72665	3.72668	4.92577	3.09726	3.24776	3.80373	3.13367	3.35625	2.83099	3.62532	4.27628	4.29774	3.80578	4.07849	3.47874	4.2216	3.67903	3.76344	3.79586	3.26268	2.17635	3.5822	3.47219
ARMC5	5.59547	4.86236	5.7169	4.32071	5.20074	4.98498	5.02829	5.01843	5.73893	5.44661	4.60327	5.20964	4.95542	4.16242	6.0641	4.95456	5.63902	4.69181	6.20833	5.15752	4.84432	5.40954	5.82728	4.77868	5.82296	4.97546	5.17883	5.45715	5.63364	5.46386	5.67727	5.49824	4.71757	5.10194	5.2559	5.0694	5.10875	5.18684	4.7434	5.27852	4.73316	5.32453	4.97425	5.73353	5.07145	4.69019	5.76837	4.945	4.73139
ARMC6	3.87648	4.61825	5.46886	5.12619	4.62218	5.05735	3.9499	5.03271	4.35312	4.73735	5.19542	5.7008	4.03129	5.76605	5.48298	5.62113	4.13242	5.27852	5.59277	5.0484	5.06219	5.18116	4.28331	5.08437	4.33761	5.17581	4.78917	5.58746	5.68201	5.00643	5.95511	5.31293	5.53199	4.00873	4.7525	5.14882	5.19266	5.50013	4.73365	4.47954	4.684	4.80774	5.47977	4.63021	5.61107	5.08799	4.94712	5.25043	4.57079
ARMC7	4.96115	4.56863	5.48654	4.79672	4.49528	4.50829	4.93794	4.95501	5.58334	5.31826	4.73611	4.00068	4.94757	4.42294	3.71744	4.46991	5.91053	5.36858	5.25241	5.166	5.50269	4.65269	5.07684	4.30532	5.88329	4.46435	5.14464	4.82412	5.53093	5.19161	4.89754	5.15977	4.35062	4.96414	3.90474	5.41809	4.04347	5.66548	4.48127	4.94457	4.55947	5.24784	5.2057	5.51786	4.80935	5.42272	5.74102	5.10656	4.48374
ARMC8	6.4818	6.19198	5.89398	6.17433	5.94724	5.97098	6.17284	6.22283	6.01606	6.31509	6.07546	5.64402	5.71203	6.66702	6.888	6.05319	5.98642	5.80011	5.88987	5.76046	5.88218	5.97481	5.94031	5.83863	5.64499	5.66617	5.6883	6.13768	6.36978	5.68128	6.40555	5.84191	5.84014	5.80813	5.64566	6.03815	6.07364	6.12158	6.02948	6.01987	6.112	6.12916	5.76282	5.91363	6.13149	5.88603	6.57441	5.91646	5.92627
ARMC9	2.36785	1.76578	1.83253	1.25507	2.56387	1.78265	2.83099	1.23448	0.738075	1.50633	2.99339	1.41914	1.73688	2.54096	2.44618	1.75661	2.57859	2.15721	1.76455	2.46051	1.74944	3.0745	1.3471	1.26159	1.94765	2.40487	3.85478	2.89248	0.695523	1.72201	1.10686	1.9095	2.39753	1.50171	2.89094	3.16927	4.21614	3.31933	2.46533	0.995546	3.15744	1.6637	3.07257	2.54597	2.20215	1.68987	2.69913	3.34946	2.70407
ARMCX1	9.55869	9.16076	8.92722	9.22654	9.08117	8.84855	8.874	8.7324	8.87246	9.38977	9.08304	8.86072	9.51084	8.22469	8.74724	8.90362	9.22848	8.63275	8.65439	8.97798	8.66593	8.33899	8.61081	9.28568	8.94357	8.90362	8.87547	9.01818	8.97798	9.40621	8.51541	9.26526	9.13843	9.02466	8.85322	9.15122	9.06544	9.36585	9.16489	8.96016	9.22195	9.29011	9.26526	9.01818	8.88818	8.93866	8.87837	8.58724	8.59304
ARMCX2	7.63499	6.94663	7.20124	7.16715	7.5105	6.96811	7.33214	7.59189	6.86389	7.15854	6.94709	6.94209	7.23642	7.01484	5.98678	7.50765	7.15896	7.17996	7.11176	7.73987	7.63944	7.24482	7.02472	7.54047	7.22522	7.19982	6.89869	7.32474	6.95807	7.64238	6.31549	7.51568	7.27835	7.54103	7.6526	7.54103	7.18924	7.18375	7.34001	7.55807	7.40523	7.65632	7.58665	7.57728	7.14811	7.61375	7.60134	7.21081	7.78316
ARMCX3	8.6595	8.54518	8.11445	8.28244	8.78248	8.22567	8.44807	8.55494	7.89982	7.8751	8.54901	8.25894	8.62769	8.03412	8.11636	7.87292	7.98343	8.09621	8.20843	8.45058	8.5041	8.35273	7.85304	8.37433	7.38863	7.8508	8.08576	8.21997	8.06501	8.59423	8.14131	8.61226	8.63152	8.19234	8.47653	8.30038	8.24462	8.11782	8.55935	8.22196	8.93359	8.4296	8.40247	8.06993	8.28432	8.20046	7.75229	8.42293	8.17231
ARMCX4	3.3854	3.52633	3.57946	3.75089	2.76137	2.03197	3.04422	2.70205	3.12684	4.3126	3.42047	3.43502	3.02584	2.89021	3.70831	3.29126	3.66204	3.59161	3.89562	3.74839	2.36683	3.12744	3.25065	3.58433	1.86626	2.03101	3.77362	3.4411	3.05026	3.75744	4.6359	3.53851	4.09555	3.79222	3.33159	3.35798	3.37575	3.04422	3.25065	3.76748	3.89807	3.91076	3.48211	3.55511	3.5839	2.35695	2.95747	4.0923	3.4928
ARMCX6	8.55259	7.8773	8.57455	7.98891	7.94553	7.88353	7.87026	8.18414	8.09389	8.24462	7.74603	8.19059	8.26496	8.03161	7.31938	8.59304	7.9711	8.23786	8.13044	8.14057	7.86646	7.86502	7.79431	8.44401	8.57078	8.06334	7.8363	7.56216	7.74396	8.70782	7.60858	8.18323	8.31762	7.66971	8.53808	8.04454	8.17325	7.64745	8.18414	7.95781	8.2872	7.72113	7.98505	7.73243	8.3319	7.81343	8.57798	7.54273	8.00323
ARNT	5.75371	5.32529	5.07527	5.19342	5.85786	5.58222	5.8333	5.48016	5.18323	5.23743	5.27056	5.30279	5.41143	5.53124	5.17025	5.33466	4.56774	5.43065	4.9706	4.89439	5.36894	5.41143	4.96868	5.27452	5.01585	4.63763	5.61143	5.25865	5.0207	4.98902	5.19161	4.92108	5.4382	4.96033	5.4045	4.7671	5.166	5.09589	4.76545	5.1691	5.50083	4.41351	5.0749	5.01241	5.40812	5.17274	4.74208	5.2359	5.62894
ARNT2	5.24409	3.724	3.82011	4.945	4.92662	5.40587	5.26307	5.54726	4.72294	5.05773	4.36764	5.27852	4.24883	4.21216	4.76877	4.61517	2.2645	4.30532	4.04018	3.91923	4.47678	4.51668	2.71762	4.34345	4.51969	4.61868	4.80207	4.75784	4.07943	5.18323	3.80044	5.08077	4.35445	3.61084	5.57804	5.10153	5.39213	5.37347	5.03895	4.08499	5.17274	4.77434	5.14733	4.44891	4.49315	4.15611	4.65895	4.74597	4.09319
ARNTL	5.95745	6.45384	4.08452	5.16377	4.99403	5.54465	2.95882	5.24675	2.95003	1.63732	2.50536	3.54115	4.19144	6.33213	6.52083	4.66314	5.53272	5.07323	4.74062	4.18625	4.91387	4.29648	4.68895	4.73573	5.5745	3.8261	5.32376	5.06783	4.89754	3.66156	5.32886	5.22591	2.62307	2.88514	1.78331	1.44913	5.86547	5.89957	5.8311	5.84091	5.12886	5.41659	5.18722	5.20258	3.25555	3.80085	5.32023	5.24637	4.63069
ARNTL2	1.70133	1.6602	1.75121	1.75786	1.69206	1.85906	1.69387	1.70717	1.21006	-0.0494645	0.580791	0.945907	3.79687	1.22869	1.1252	2.69052	1.89597	1.36126	0.125476	2.25391	1.77274	2.22254	3.11262	1.03551	1.2355	1.15594	1.51803	3.13429	0.994889	0.644034	3.04764	1.19868	1.46694	1.3696	1.29894	1.79227	1.19157	1.25286	-0.00807103	0.724989	1.39531	1.61639	1.0477	2.79538	0.4892	1.98251	1.79537	1.16302	2.57569
ARPC1A	8.65692	8.44284	7.34115	8.16031	8.60573	9.10369	9.2308	9.09995	8.83792	8.73906	8.4786	8.42531	8.00638	7.71914	8.49067	7.97564	9.3254	8.70526	9.4287	7.96313	8.7974	8.11445	8.78248	8.52439	8.99872	8.7324	8.89407	8.58609	8.24558	8.76032	8.06585	8.98675	8.50975	8.56356	8.37815	8.7629	8.70127	8.7515	8.88818	8.94832	7.87882	8.42634	8.51775	8.76437	8.50874	8.73504	9.14538	8.02431	7.70383
ARPC1B	6.20577	7.67895	7.29272	7.39942	7.55807	7.7405	7.36333	7.31632	7.51568	7.21122	7.83105	7.91049	7.73243	7.17058	7.48938	7.72811	7.94283	7.5145	7.90918	8.31935	8.56482	7.34379	7.99371	7.53717	8.30699	7.96095	6.17175	7.39192	7.67632	6.68274	7.17105	6.64694	7.40639	7.23173	6.86701	7.00927	7.12894	6.87259	7.70188	8.07823	6.9266	6.70185	6.22063	6.88235	6.9324	7.12126	6.85992	6.80439	9.34944
ARPC2	9.00736	9.34339	9.26526	9.20738	9.25262	9.4645	9.48731	9.35201	9.5945	9.43593	9.5458	9.45981	10.1278	9.64454	9.4287	10.124	9.53869	9.38221	9.17219	9.73935	9.6205	9.6826	9.72034	9.6797	9.81679	9.50798	8.94028	9.52135	9.53403	9.2633	9.51084	9.17219	9.63141	9.49751	9.49493	9.31591	9.45515	9.11315	9.62611	9.55614	9.41351	9.24788	9.21994	9.28108	9.38977	9.1883	9.39886	9.25262	9.79529
ARPC3	7.79506	7.50629	7.39471	7.59051	7.17213	7.97564	7.7845	7.75855	7.71402	7.89591	7.25388	7.57059	7.94208	7.85787	7.8454	7.94349	7.93368	7.67762	7.60858	8.34185	8.32721	7.87092	7.79228	8.0407	8.02653	7.61116	7.32322	8.01739	8.2559	7.67632	8.08827	7.84128	7.98665	8.76992	7.53106	8.48641	7.33005	7.46912	7.72113	8.82336	7.63813	8.14292	7.65632	8.07487	7.50993	7.81548	8.37328	7.73512	8.91141
ARPC4-TTLL3	1.96052	4.84835	3.2129	2.03517	1.92588	4.02697	4.24919	3.52572	1.36025	2.84803	3.07319	3.09143	3.44376	2.63769	3.49119	2.75871	3.47157	2.36559	3.5943	2.20793	3.74583	2.41412	3.2579	2.27424	2.95625	1.93002	2.92105	2.91754	2.71939	2.95812	2.96878	2.78165	3.29297	3.82066	3.44658	4.32034	1.99805	3.24046	1.89202	3.47697	3.29749	3.71845	2.48342	4.48595	3.21541	4.60281	4.45184	3.65222	4.86064
ARPC5	7.33607	7.38014	7.44594	6.97094	7.71673	7.77743	7.3024	7.69305	7.61735	7.2302	6.99445	7.13499	7.10566	7.7641	7.7239	7.62992	7.60395	7.28518	7.83916	7.74603	7.58856	7.39658	7.70966	7.57359	8.40048	7.3777	6.43527	7.72811	7.28196	7.29145	7.90988	7.3226	7.78966	7.17007	7.28092	7.42403	7.32906	6.87574	7.0787	7.31418	7.11581	6.90436	7.15221	7.10518	7.28352	7.03525	8.11709	7.10034	8.23972
ARPC5L	7.49982	8.00158	7.96467	7.56099	7.61544	7.85019	7.92259	7.77067	7.90841	7.91658	7.08936	7.63877	7.43621	8.09389	8.22963	7.69305	7.53471	7.57793	7.43065	7.84794	7.7185	8.06993	7.94864	7.76138	8.0485	7.57536	7.00561	8.12554	7.75925	7.54164	7.64238	7.64987	7.26949	7.3024	7.79642	7.57238	7.54672	7.60196	7.61375	7.31248	7.55636	7.34271	7.28196	7.1417	7.35204	7.14768	7.77535	7.37298	6.91288
ARPP19	8.59077	8.45349	8.44807	8.68538	8.41684	8.56482	8.83491	8.60702	8.5606	8.38981	8.39947	8.35545	8.82336	8.54034	8.59676	8.52321	8.47011	8.36725	8.21738	8.11636	8.65561	8.96357	8.89091	8.51775	8.55379	8.60048	8.38777	8.70918	8.60158	8.5367	8.8088	8.66096	8.35465	8.43603	8.34866	8.29663	8.55158	8.61226	8.46024	8.5367	8.29287	8.74188	8.30887	8.65177	8.46131	9.01105	7.74603	8.4721	8.63152
ARPP21	2.05107	0.816238	0.924691	2.77005	1.98251	0.897815	1.55312	0.90998	1.06568	1.00576	0.966911	1.04522	1.21329	1.35092	1.82985	2.32568	3.21795	2.02371	0.0318453	1.23705	1.48034	0.945907	2.1597	-0.378733	1.62922	1.79589	1.08688	1.02561	1.16247	1.39188	1.1252	0.962128	0.16796	0.584727	1.11257	2.95163	1.16135	1.6858	1.0484	1.87598	1.30052	0.644034	1.90717	0.760188	1.23448	1.67453	0.960895	1.39137	0.196141
ARR3	0.859725	0.884807	3.63026	4.95672	3.14934	3.57946	4.22433	0.889048	1.56386	3.25972	3.53215	1.59345	1.87229	3.63077	4.61825	3.69908	3.85033	2.23319	3.83063	0.667344	3.16677	1.82523	3.9286	0.0912831	1.33486	2.56475	1.62922	2.36107	2.95944	2.04997	1.94939	1.73218	1.65358	3.63513	3.39286	3.97033	1.78657	4.15064	2.83648	3.47943	0.141275	0.852228	0.126767	4.64747	0.674886	1.08688	3.11951	2.30362	1.69321
ARRB1	5.84337	6.07802	6.25786	5.4224	6.02559	6.45954	5.89817	6.3336	5.57294	6.17138	6.40157	5.73652	5.65618	6.44179	5.73759	5.8758	5.63547	6.20686	5.84373	5.91711	5.88635	6.15834	5.77158	6.35918	6.17895	6.27243	5.97338	6.01467	6.01948	5.96438	5.93304	5.82371	5.85405	5.26733	5.94187	5.26276	5.89497	5.31826	5.77016	5.7019	5.94878	5.40414	5.75404	5.63768	6.19737	5.65233	5.65804	5.48546	6.64884
ARRB2	2.098	2.76507	3.72049	3.36545	2.049	3.54957	2.05517	5.143	3.08407	1.33088	3.41722	4.64662	3.94271	3.10786	2.69142	4.4112	3.13683	3.68799	3.1438	4.38638	3.98815	4.13242	4.01587	3.00992	4.05643	3.378	3.46728	2.70007	2.35342	2.00086	2.62651	3.02799	2.62395	2.85381	3.57057	2.98083	2.249	3.08097	3.61525	4.14073	3.0396	-0.999504	1.66136	2.92474	3.14124	2.40385	3.22538	1.42651	6.77469
ARRDC1	4.28643	4.56118	5.01677	4.28416	4.62084	5.02405	4.78568	5.31524	4.52233	4.95672	4.51336	4.84028	4.82693	5.10279	5.16015	5.0188	4.62259	4.55107	4.97269	5.04326	3.81782	5.51554	4.75047	4.77081	4.71873	5.17544	4.8853	4.59543	4.65399	4.91507	4.62001	4.71413	4.97665	4.73491	5.22741	4.56774	5.09152	4.39632	4.84066	5.32565	5.34375	4.52675	4.22532	4.16393	5.10947	4.30716	5.88603	4.67249	4.809
ARRDC2	5.00805	5.82511	6.36669	5.74102	5.012	5.02713	4.86104	5.5502	5.37383	6.45047	6.00513	7.26236	4.67004	5.4207	5.15038	5.99181	6.01242	5.33323	5.70908	5.31484	4.24291	5.17425	4.69441	4.37883	4.22873	4.85565	5.48473	4.65617	5.71412	5.0298	4.78734	5.61287	6.62669	6.15635	6.14902	6.2138	6.15974	6.36215	6.20358	6.36144	6.5089	5.99854	6.45916	6.40243	6.12435	6.20903	4.69755	5.16987	5.88143
ARRDC3	6.94663	7.07962	6.39056	7.39658	6.93456	6.95124	7.34814	6.92611	5.81399	6.0891	8.05275	6.77429	7.06688	6.41809	6.79511	5.86008	6.08648	6.1571	6.13397	7.58986	7.70118	7.24644	6.73223	6.76302	6.94805	6.51803	7.52008	6.88757	6.32442	6.22324	6.57766	6.31509	7.80119	7.64238	7.66393	7.93142	7.91806	7.37072	7.56569	7.72457	7.76463	8.14557	7.4357	7.30338	7.3226	7.32429	7.21429	8.06082	8.1322
ARRDC4	7.03769	7.02055	6.45791	6.77429	6.83268	6.74104	7.4263	7.42517	5.7277	6.81988	6.65043	6.81762	6.48889	7.28882	7.58236	6.42858	6.41129	6.62104	6.51682	7.00423	6.64925	7.0047	7.05003	6.51803	6.27277	6.43527	6.17069	7.38078	7.22522	7.56569	7.41996	6.911	6.92759	6.56508	7.52874	7.89388	6.69931	7.0664	6.34454	6.21479	7.52742	7.40695	5.87289	5.78178	6.96672	6.93901	6.91288	6.55272	8.31762
ARSA	1.49481	2.82802	1.54588	4.73267	1.49646	1.97788	1.49481	1.50448	1.91441	2.12646	3.78531	2.4295	2.94645	1.74201	3.74325	2.97608	3.41167	3.86136	3.76096	1.28847	4.46209	-0.0032134	2.62935	1.95887	3.46777	2.68586	2.08384	2.13337	1.98589	3.1763	1.66677	3.33844	2.95163	3.52369	2.70684	3.22476	3.09927	2.8084	3.42604	4.46258	2.97173	1.1934	4.3022	3.76645	1.27746	0.853598	3.04764	3.59831	3.65481
ARSB	4.38594	4.47085	3.88723	4.24197	5.23774	4.72086	5.25466	4.8893	5.03977	4.85298	5.08601	5.20929	5.41354	4.65691	4.97269	5.43214	4.93077	4.80935	4.24022	4.88367	4.96247	5.13637	4.5946	4.48844	4.24829	4.9854	5.18845	4.31304	4.39209	4.53172	4.60898	5.0488	4.38284	5.19266	4.5277	5.6063	4.27454	4.72294	4.64574	4.80409	4.41032	5.21793	5.41178	4.98902	4.5053	4.93279	4.24605	5.29609	4.74062
ARSD	3.66514	4.45015	3.56633	3.0356	4.10771	4.05124	2.68791	2.2645	3.03616	4.23924	4.74471	4.49936	5.50269	4.87402	2.96947	4.20355	3.85331	3.96652	4.39435	4.48459	3.7422	4.33891	3.15394	5.21828	4.31647	4.393	4.20533	3.54849	4.91137	3.54849	3.29368	4.549	4.46947	4.03697	3.59831	4.52233	2.94564	3.01861	4.33532	4.45459	4.28643	3.81214	4.23418	4.16969	4.40352	3.27084	3.89376	4.61614	4.5066
ARSE	3.90373	0.984015	1.06896	1.07316	1.02371	4.07623	2.8117	1.05911	3.40014	3.31704	1.22758	1.50504	3.51029	0.101253	0.626304	3.69115	1.89064	0.284988	3.63564	1.89844	2.79122	1.97894	1.5127	3.45013	1.31669	2.76844	3.94179	3.50034	1.86479	2.18007	2.75163	3.00926	3.36188	3.72934	2.7456	4.18718	3.86957	1.65548	3.17239	1.97582	3.63216	0.65948	3.29749	4.22248	3.41291	2.54894	1.4422	3.00435	1.46694
ARSF	3.27143	3.97308	4.30716	0.526507	2.6655	2.92837	2.97393	0.497197	1.55187	2.31341	2.06439	2.51082	3.18865	1.33597	4.14802	1.43277	3.47271	1.43653	1.17942	4.51626	2.91897	4.01175	3.23988	2.40949	3.71796	4.05963	4.18478	4.00387	3.78739	3.97506	2.55999	4.69441	1.07812	0.20234	1.75844	0.546272	3.95991	1.68868	0.613202	0.994889	4.85255	2.2562	4.37883	1.01414	4.55899	0.549595	1.50691	2.87852	2.51082
ARSG	3.96788	3.37398	3.93196	3.17116	4.49776	4.11886	2.97608	3.20083	3.67859	3.58859	3.29175	4.42462	4.64617	3.49972	3.26083	3.32113	4.51254	3.73652	4.29475	3.13614	3.15332	4.32874	4.04982	3.26916	1.88049	4.09271	4.18388	2.97538	3.78932	3.5911	3.19294	4.36167	4.30532	3.62917	4.75914	3.82951	3.98037	4.0256	4.14402	4.63553	4.13002	4.61097	4.27322	4.49574	3.95482	3.80044	3.87164	4.10998	3.97709
ARSI	0.948777	0.899365	0.991573	0.98731	0.940008	0.960228	0.952746	0.98731	3.04897	2.55493	1.01797	-0.0461083	1.25567	1.45745	5.2156	1.34441	0.342991	1.3747	0.87669	1.02048	1.61928	0.268755	1.16192	2.79371	3.43559	1.89766	2.0753	2.40487	1.06756	0.656018	1.21968	0.228778	0.319499	4.73816	0.977858	0.269636	0.604866	0.897815	0.465876	0.319499	0.0383333	1.06631	0.903888	1.85472	1.38328	4.20216	0.787751	1.55085	1.53841
ARSJ	3.55784	2.84735	3.62416	0.801932	0.744057	1.92117	2.17746	3.72251	2.92179	1.76455	2.71939	3.4183	3.37688	4.83941	1.67642	2.85941	3.38825	1.24606	3.77205	3.52572	1.80923	1.3471	1.87071	3.96788	4.16969	3.20833	5.76605	2.22826	2.51621	3.12974	2.50536	2.26815	3.87693	3.02431	1.3651	4.4305	3.98759	3.08594	3.89949	3.95037	3.74325	4.00519	1.01988	2.15488	3.63026	1.81451	3.47157	3.97214	2.68871
ARSK	3.68896	4.03646	4.84311	4.62084	3.66514	4.41892	4.38151	4.28121	3.79074	3.39908	4.99596	4.69623	5.59973	4.87074	4.41546	4.02338	3.9674	5.18154	4.38892	4.48374	3.83445	4.14973	2.90907	4.68055	3.68896	3.89517	4.63387	4.09866	2.9016	3.95375	4.26047	4.99796	4.39953	4.38107	3.71582	2.75546	4.19944	4.56432	4.6298	3.50201	4.65617	3.64518	4.39817	3.76748	4.75207	4.11362	2.78968	4.079	4.53254
ART1	3.99591	3.87067	4.42958	4.41546	3.14687	3.93745	3.37628	1.80141	4.73573	3.35855	3.756	3.69852	4.01546	3.01797	3.8097	4.57079	4.0923	4.07715	2.95405	3.2561	3.46122	4.09411	4.07623	4.01352	1.70133	4.24462	3.54689	4.33585	3.74741	3.96042	4.71413	3.59161	3.7669	4.1725	4.01546	4.48972	3.8808	4.07666	3.10299	2.95882	4.14624	3.64969	4.01254	4.07106	3.77257	4.28374	4.03885	3.34368	3.4981
ART3	10.2039	9.29011	9.91275	9.95145	9.69054	9.01494	9.3964	9.05982	10.3439	9.62318	9.64454	9.54815	8.82622	8.99523	9.23456	9.19646	10.1698	9.44781	10.178	8.45792	9.62611	9.2834	9.81679	8.7974	9.1883	9.01298	9.21178	9.21812	9.70543	9.31361	9.39215	9.18421	8.14891	9.07098	9.38484	8.42745	9.81976	9.73295	8.4786	7.92909	8.0421	8.58134	9.0212	8.85616	8.53551	8.68813	9.20088	8.40976	9.37789
ART4	4.51336	5.20487	4.0919	5.45907	4.81641	4.51336	4.59195	5.07887	5.34673	5.28896	5.40012	4.76054	4.5886	4.63763	5.62576	4.59415	6.3109	4.21127	4.65029	4.22064	3.89713	3.57324	4.43621	3.63414	4.63515	4.66788	4.2266	3.88997	4.50571	4.44891	4.82445	4.78229	5.54499	5.40012	4.59501	5.19022	5.67179	5.49671	5.24487	5.93235	4.56774	5.22904	5.6073	5.19087	5.51823	5.43894	3.92069	4.8048	6.75745
ART5	1.52858	1.49365	1.57888	1.57728	1.52681	3.38369	1.52462	1.53734	0.801932	0.890481	0.166911	0.066649	1.19099	0.951383	1.24443	1.68805	1.33432	1.3471	1.31231	1.3084	1.19099	1.13959	2.79292	0.244151	0.178667	1.23647	1.40131	1.91794	2.10888	2.4988	2.13013	1.58837	0.657204	1.61404	1.02436	1.47227	1.27136	1.4734	1.82391	1.3084	1.17526	0.465876	1.5334	0.920135	0.566938	1.4686	1.26159	0.678232	0.282647
ARTN	1.69558	1.65238	1.74442	1.75121	1.6858	1.68868	1.68924	1.70012	0.722062	1.46298	0.797123	0.996246	0.555849	0.800243	2.0268	1.17292	1.70429	0.906214	2.57954	0.921596	1.69719	0.907831	1.69611	1.75367	2.3245	1.0626	1.06043	2.95473	2.12556	1.52352	2.11213	1.64865	0.709881	1.51094	1.48088	0.811954	1.55532	1.43774	0.853598	1.44852	0.734406	0.960895	0.787751	1.41528	0.780678	1.61579	0.975696	1.19759	0.853598
ARV1	7.28196	7.68204	8.2559	7.49538	7.53162	7.37555	7.31889	7.19371	7.58236	7.41338	7.69815	7.75024	7.99845	7.87593	7.41996	7.96797	7.16553	7.71096	7.62801	7.38368	7.37604	7.4431	7.34814	7.6724	7.60134	7.84471	7.84128	7.29488	7.76332	7.75925	7.33607	7.45828	7.38309	7.19371	7.78389	7.23533	7.84732	7.34115	7.78665	7.25985	7.74396	6.83753	8.12296	7.51273	7.56156	7.59466	6.87218	7.79094	7.48645
ARVCF	5.36234	1.94939	2.06545	5.30209	4.19543	4.25224	1.99215	2.01612	1.61473	2.29043	1.67336	1.89361	2.43681	3.80681	0.991573	3.724	1.97582	3.28779	3.25322	3.25849	1.32735	3.68744	1.22471	3.5822	4.70599	1.51586	3.67278	3.8169	1.74033	4.35495	3.65633	4.64404	2.1978	1.94069	4.10861	1.60543	3.85979	2.24675	3.86515	1.11257	3.05293	1.58779	3.61416	0.864366	3.89048	0.724086	4.31094	2.26945	0.857325
ARX	1.75719	1.71367	3.40448	1.81704	1.74201	1.74505	1.74033	3.48724	2.56577	1.88924	0.897093	1.56765	2.65036	1.6444	3.18295	1.62564	3.45915	1.69611	3.42161	0.0537319	3.7127	1.36621	4.01774	1.21751	0.60063	1.69776	3.11389	1.82037	3.42817	2.27837	3.28672	3.44056	1.13484	3.14875	1.5815	3.15563	1.79716	3.56677	1.64561	3.29368	0.704756	3.57687	1.61352	4.57414	1.18875	2.58713	1.40285	1.43002	1.85906
ASAH1	10.7138	10.4951	10.2917	10.518	10.5073	10.3741	10.7138	10.6626	10.4099	10.5543	10.7056	10.8915	10.5889	10.4562	10.5073	10.6201	10.6694	10.3893	10.7622	10.3336	10.6146	10.1442	10.4668	10.4046	10.5006	10.4464	10.2178	10.6768	10.6768	10.5362	10.6475	10.5543	10.4464	10.684	10.5889	10.4351	10.7056	10.7212	10.3893	10.8157	10.2385	10.5596	10.1611	10.271	10.684	10.8157	10.2178	10.6084	10.7685
ASAP1	5.52539	7.0079	6.17934	6.5133	6.29198	6.4206	6.21479	6.30711	6.3434	6.64771	6.22101	6.06813	6.29893	6.64804	6.90819	6.65483	5.99744	6.00615	6.14979	6.45314	5.77351	5.89262	5.73462	6.3477	6.02663	6.70225	6.58622	5.97772	6.18188	5.77192	6.17138	5.84452	7.32751	6.90522	6.82492	6.67312	6.53193	6.32408	6.49293	6.3769	6.95364	6.72115	6.50417	6.13544	6.5821	6.41546	7.63877	6.20646	6.76733
ASAP2	6.70312	7.20273	6.55145	6.83753	7.17305	6.31434	6.72709	6.53655	6.46784	6.39924	7.22211	6.67352	6.48287	6.97691	6.39589	6.82232	6.14758	7.11034	6.66789	6.8802	6.32168	6.70273	6.02876	7.13151	6.62848	6.62546	6.37538	6.89341	6.61644	6.17794	7.22158	6.82568	7.52312	6.8802	6.92077	6.71653	7.54217	6.67517	6.85139	6.95364	7.11779	6.81805	6.58367	6.39283	7.33492	6.59726	7.88274	6.98706	6.9622
ASAP3	5.77743	5.79494	5.97912	5.34597	5.88143	5.62502	5.52681	5.62926	5.74657	5.79908	5.42103	5.26619	6.16689	5.38835	5.96732	5.48016	5.7859	6.16992	5.92495	6.07719	6.31212	6.35805	6.10102	5.97338	5.31056	5.66132	5.97698	5.9828	5.68861	6.29825	5.44154	6.06813	5.30005	4.88094	5.23388	5.4674	5.56027	5.70262	5.82226	5.38464	5.50688	5.7102	5.55332	5.9385	5.3119	5.92427	6.26604	5.43537	5.58962
ASB1	6.65657	5.38647	6.21479	6.11341	5.87512	5.98496	6.53307	6.03884	5.13337	5.13794	5.65873	5.76538	5.0007	5.16712	5.3571	5.23774	4.8188	6.05136	6.35493	4.57626	5.10586	5.4234	5.70908	5.65548	5.24066	5.70876	5.43365	5.25712	6.06009	5.97808	5.98465	5.48129	5.53709	5.495	6.10458	5.63693	5.87854	6.06665	5.43498	4.83085	5.89326	5.36055	5.84414	5.75371	5.88603	5.70724	5.87923	5.85749	5.35528
ASB10	2.0817	2.0059	5.52902	2.16913	2.03301	2.04796	2.04589	2.05928	1.59824	2.70304	3.18482	1.74266	1.5127	1.43831	1.28619	2.36328	0.166031	3.05293	2.03962	0.418885	-0.0209548	2.6655	1.49111	2.83553	2.05601	3.4089	3.50572	2.26332	1.28268	1.97213	0.9193	3.20205	1.18	3.11951	2.67647	2.30247	2.95473	2.83326	2.03197	1.88767	1.76698	2.35695	3.24595	1.62498	2.41768	2.77913	2.42291	1.53611	0.219368
ASB11	4.85093	3.2466	5.20817	5.57512	4.98618	5.26383	3.99057	5.58667	5.97234	5.40517	5.90234	6.32287	6.64572	3.93053	4.2216	5.77609	6.29019	5.381	5.71615	5.32298	5.28815	6.19487	5.83504	5.05449	7.23432	5.28122	5.70366	5.73579	5.06177	5.35904	4.47678	7.52805	4.93996	6.33848	5.24297	5.29308	4.70515	4.9355	4.5983	4.16297	5.09969	5.7976	4.79337	5.71898	5.26307	5.87067	3.58162	5.69592	4.91869
ASB12	4.30974	4.24064	2.86877	3.39401	3.96135	4.77915	4.81348	2.76844	5.77421	3.70531	6.24991	5.57843	5.6254	5.1687	4.99072	5.77234	3.81591	4.73816	5.65515	4.63112	3.83202	5.86663	4.93671	5.32421	4.29346	6.54385	4.85606	4.5321	4.75914	3.83651	5.13564	4.57976	1.48735	3.35223	4.28772	3.35405	4.42775	3.43999	4.51414	3.50458	3.72203	0.672696	2.25991	2.74839	4.09731	1.93757	0.0497139	4.22382	2.91897
ASB13	6.72243	6.54504	6.97606	6.07183	7.24482	7.34541	6.476	7.08258	6.72874	6.60171	7.68283	6.34881	7.20575	6.04175	5.81959	6.65778	6.83934	6.88458	6.77512	6.77609	7.37298	6.63764	7.26694	6.27617	5.79225	6.61108	7.11684	6.66826	6.65862	7.28835	6.76483	6.88992	7.02202	6.94577	6.70103	6.99356	6.46913	7.21636	5.81259	6.19562	6.46346	6.99311	6.426	6.56756	6.4563	7.18711	5.82969	6.52743	6.28981
ASB14	4.6157	4.30487	4.14839	5.44916	4.24064	3.37688	4.44259	4.14121	5.40812	5.20892	5.71832	4.66749	4.09647	4.45062	5.87474	5.25241	4.78229	6.05973	4.54079	4.57585	3.48838	4.13537	4.22977	4.60448	2.98083	4.80856	4.26621	4.934	3.95706	4.12423	5.32816	5.82969	3.18295	3.724	3.94752	3.35283	4.50619	3.86711	4.71456	4.24022	4.82564	4.13051	3.95991	4.8293	4.23601	2.31471	3.76892	4.1706	3.25728
ASB15	5.65307	5.26124	3.7422	5.57729	4.73735	5.2559	5.19788	3.55623	5.94472	5.18645	5.64078	5.89089	5.76636	4.51295	4.34389	4.61918	5.59277	6.09009	6.13362	4.42414	4.89483	4.7496	4.60978	5.06261	3.47039	4.59195	5.66471	6.21867	4.23327	5.62576	4.77823	6.27461	5.88402	5.6326	5.7277	5.65476	5.65125	5.24709	5.21977	4.12907	3.46829	4.95421	6.02309	5.37634	5.0797	4.73267	4.25174	5.10984	3.96609
ASB16	5.15896	5.5367	4.11798	4.92382	4.06394	1.28268	1.28506	4.89018	4.37582	4.32649	3.86421	3.25197	3.95433	4.52325	1.96764	5.26799	0.938644	5.06501	3.38761	3.53956	-0.144427	5.47906	4.95095	4.21305	1.15667	4.50743	4.94674	4.45101	4.62343	4.1981	4.54124	4.76177	4.02602	4.37977	3.3506	4.07849	4.31015	4.96868	4.29475	4.36216	4.99678	3.86902	4.71318	5.8758	4.68188	1.50336	6.14427	3.76442	3.5806
ASB17	0.43407	2.11746	2.41299	3.35223	2.7572	3.75274	0.43407	0.442851	1.19698	1.34762	1.6602	4.01817	2.3308	1.32526	4.20618	0.471968	1.91708	3.69397	0.364861	1.26102	3.0887	0.262697	3.4411	2.88941	0.932529	2.69052	1.51217	1.4422	1.64077	1.95354	1.50691	1.48088	3.45292	1.09122	4.09049	1.15778	0.590541	4.09731	0.497197	3.32462	2.23196	3.8457	1.14144	0.843453	1.16655	1.71139	0.87893	1.3471	1.43559
ASB2	7.72113	7.29639	7.74676	6.95758	6.73349	7.42228	7.39891	7.90988	8.28619	7.36287	8.02288	8.06164	6.54675	6.52823	5.75635	7.46252	7.36435	8.26397	7.92035	7.36435	6.84051	7.35911	7.55095	7.13955	7.3406	8.22674	7.33717	7.94775	7.39252	7.81826	8.32626	7.76666	7.31889	7.82396	7.7344	7.53047	7.96871	7.93765	8.06585	7.91958	7.14369	7.10325	7.70321	7.66713	7.49879	7.61677	7.39721	7.2523	6.42261
ASB4	4.75368	4.3833	4.50743	3.77468	4.09819	4.65066	4.40617	4.84028	4.40488	3.8468	5.96919	4.60113	4.65445	4.10957	3.53754	4.64787	4.72214	4.92108	4.37977	3.65023	4.00614	3.77048	3.25972	4.36764	3.45292	4.16201	4.09362	4.26182	3.71744	4.7434	3.00926	4.76877	3.13872	3.27328	4.31909	4.09948	4.61476	5.07887	4.99757	4.13242	4.70351	4.94207	4.13242	4.4017	3.51354	4.16053	4.39479	3.83112	3.72463
ASB5	6.44215	6.03914	6.38173	5.77708	5.79323	5.59062	5.97625	5.39613	6.26975	5.69111	5.83432	6.41353	5.99984	5.56461	5.64781	6.12372	5.80011	5.61399	6.14541	4.95948	5.22549	6.29344	5.92668	5.34018	5.52215	5.98642	5.64047	5.04457	5.94187	6.858	6.11376	6.00884	5.56929	6.16206	5.92394	6.37173	5.98358	6.37135	6.48019	6.56988	6.19668	6.48098	6.12405	6.34691	6.01833	6.23066	5.18722	6.50496	5.76982
ASB6	4.90159	4.75085	5.30071	4.45594	4.48719	4.5908	4.3152	4.4233	4.99284	4.06254	4.98826	4.91095	5.33239	5.21828	5.2171	5.15228	4.12464	5.22446	4.97588	5.34344	4.49776	4.08359	4.5828	5.26463	3.59524	4.83328	4.41452	5.14542	5.0298	4.79337	5.19542	5.28122	4.88811	4.86544	4.16838	4.27368	4.05872	4.96414	4.74425	5.10153	4.81183	4.84597	4.60281	4.67557	4.58498	4.45772	4.41671	4.77868	4.93589
ASB7	5.44848	5.04407	5.60599	5.8718	5.44324	5.21033	5.22779	4.94081	5.52475	5.48509	5.94508	5.4045	5.65583	5.77885	4.75407	5.64256	5.4266	5.46082	5.81399	5.46925	5.15896	5.48091	5.61473	5.27419	5.62782	5.21112	5.78105	5.52571	5.08871	5.22591	5.06745	5.39648	5.29308	5.49671	5.47836	5.30754	5.05298	5.61143	5.41178	5.3409	5.41917	5.32925	5.55797	6.0075	5.5808	5.62709	5.01241	5.47439	5.34524
ASB8	7.87171	8.35465	8.17325	7.70724	7.8079	7.90048	7.84052	7.9711	8.18958	7.93837	8.75009	8.06929	8.44401	7.72592	7.44535	8.24558	8.10131	8.2069	8.11931	7.31517	7.43805	7.87171	7.32153	8.11709	7.98811	7.74747	8.20775	7.82532	7.70321	8.16283	7.88426	8.36821	7.70784	7.96632	8.13796	8.15418	8.13128	8.21475	8.08068	8.1063	7.96382	7.69109	8.05117	8.37225	8.07998	8.03923	7.28258	7.98028	7.75164
ASB9	4.1706	4.74514	5.02713	4.18346	4.37668	4.09098	3.03267	3.78739	4.12506	4.16969	4.77391	5.53986	4.4305	2.6706	4.3058	3.82213	4.11416	4.85936	5.60833	4.08359	4.28246	3.86181	5.05409	4.03931	4.72086	4.06734	3.95433	3.86234	4.25818	3.6661	4.00162	6.17069	3.25555	4.76797	4.03263	4.98787	4.29093	3.52369	4.33157	5.15483	3.2026	4.37491	4.3246	5.24101	4.40527	4.75963	4.32283	4.19293	4.20703
ASCC1	7.25388	6.78172	7.21164	6.9631	6.64166	6.88898	6.69636	6.74188	6.99799	7.09557	6.69086	7.20071	6.49416	6.88411	6.65903	7.11684	6.97046	7.47362	7.21844	6.32745	6.83706	7.08983	7.05191	6.84532	6.89341	7.01252	6.71653	6.89956	7.40116	7.06919	7.3406	6.82492	6.80732	6.80948	6.96948	7.17794	7.35472	7.30786	6.79027	7.03948	6.73391	6.95179	7.29036	7.19133	7.38136	7.14369	6.66938	6.98425	7.24752
ASCC2	5.63089	5.55688	6.05665	5.25395	5.78209	5.61867	5.67415	6.18941	4.237	5.05102	6.08534	5.16377	5.84731	5.51411	6.23993	6.43997	4.68522	4.78483	5.21867	5.95528	4.33304	5.06662	5.61903	5.45752	6.04947	6.78038	5.91167	4.82648	5.14258	5.27972	5.54836	5.48194	5.84231	5.92954	5.78241	6.24855	6.22283	5.79842	5.9132	6.17581	6.10666	6.10286	5.33239	4.33483	6.74352	5.4939	5.57043	5.956	6.63374
ASCC3	4.91332	5.53747	5.54124	4.77608	5.51659	5.4499	5.1828	5.28085	4.99678	4.97269	5.43065	5.75371	6.06374	4.78354	4.70897	5.47654	5.12344	5.59937	4.92848	5.74277	5.37347	5.09305	5.32853	5.41848	5.495	4.92461	5.09152	5.24446	5.08916	5.33975	4.91671	5.18193	5.40992	5.77708	5.81959	6.01467	5.74415	4.95672	5.13564	5.3343	5.63547	5.69814	4.93109	5.17768	4.8853	5.12808	5.36484	5.82762	5.74695
ASCL1	1.3371	1.98251	1.39188	3.20721	2.09371	3.63814	1.3371	1.35092	1.13773	0.861924	1.22869	1.00511	-0.0802898	0.882553	1.50977	1.23875	0.192357	0.641642	1.26343	0.40635	0.120666	2.66107	1.20207	2.18535	1.79776	1.42824	1.69611	1.63901	1.7084	1.06095	1.73974	1.71678	0.844181	1.32421	1.97788	1.61473	1.22693	2.7709	2.6396	1.26807	2.5853	1.31944	2.29517	1.0523	0.980562	0.654809	0.457584	0.505083	1.05106
ASCL2	1.47798	1.44164	1.52524	1.52681	1.47397	1.47284	1.47397	1.48573	0.119466	0.886933	1.09312	0.141275	1.13007	1.13007	1.95974	1.0497	1.40823	0.812714	1.50224	0.674886	2.22136	0.444823	2.06545	2.26103	0.977858	0.787751	0.704756	0.238735	0.554461	0.155097	0.240313	0.186993	3.20205	0.841868	0.962802	0.610648	1.56089	0.638976	2.36107	0.160169	1.05911	0.186993	0.111191	0.0773448	2.29043	0.635066	0.184747	-0.551169	1.06691
ASCL3	2.70684	2.0209	0.342991	2.48457	0.342991	0.833224	3.59524	3.63273	2.9183	3.26619	2.99405	1.80601	1.57456	1.41203	2.51809	0.954011	2.24785	3.88954	4.25269	4.39435	3.80271	1.70249	5.47409	1.53841	1.81964	3.16037	4.15339	4.13678	2.54796	2.70781	2.35695	3.85277	3.48054	3.38935	4.11467	4.83128	3.43382	1.28742	1.37522	4.44971	0.937905	1.14373	2.64838	0.729786	4.04542	1.05106	2.5064	2.05208	3.25197
ASF1A	7.47141	7.06362	7.52688	6.9048	7.00032	7.08154	7.39721	7.16109	6.76599	7.43737	7.11632	7.37555	7.11419	6.98515	5.98717	7.11732	7.26444	7.26138	7.3226	6.83268	7.16664	7.15462	7.49722	7.34115	7.25444	7.17406	7.51325	6.98994	6.5606	6.8551	6.37092	6.73799	7.02518	7.09692	7.22003	7.35911	7.29488	7.32959	6.74188	7.03722	7.15809	7.40174	7.46196	7.36086	7.12709	7.07012	6.29387	7.269	6.94302
ASF1B	3.70472	2.99405	4.23601	3.7999	4.07329	3.53605	2.66191	4.48421	3.22241	3.50916	3.34725	3.96473	3.47039	1.18813	2.90307	4.50228	5.07361	4.25022	1.78589	3.5474	2.11643	3.33094	3.91923	4.15381	5.31123	3.19834	4.04066	3.75089	3.77468	3.35973	4.65399	3.67132	4.36529	4.3833	2.53552	4.24022	3.95482	1.88197	1.41914	1.8374	2.13337	4.21359	4.03171	4.23418	2.70304	3.24416	4.14304	3.52461	4.08813
ASGR1	0.903888	1.82669	0.946592	3.87693	0.894138	1.61579	0.90998	2.05707	2.50203	0.297237	1.84068	1.60349	1.98763	0.961571	1.71255	1.18465	0.673909	0.674886	5.22706	1.63316	0.920135	1.29278	1.08309	1.535	0.903099	1.48573	1.16135	3.48554	2.55772	1.54355	1.71367	0.184747	1.45987	0.921596	1.36399	3.83445	1.03359	1.65959	1.69206	4.42507	1.22758	1.51855	1.22471	0.972801	1.9095	3.72668	1.53672	1.36908	0.829046
ASGR2	1.25218	2.72408	1.30729	3.47381	1.26215	4.39578	1.26576	2.90907	1.31944	1.76772	1.85972	1.57509	1.29278	4.23802	1.74266	2.18743	1.43988	1.57509	0.0614989	1.33432	1.04522	0.590541	1.55312	1.72689	2.29861	0.724989	0.457584	1.31397	1.38328	0.542657	1.34394	1.19043	3.30282	1.49692	0.799499	1.82669	1.67877	0.534869	3.17116	2.82137	0.967542	1.76949	1.15126	1.24503	0.193378	-0.000785066	0.991573	1.77144	1.55645
ASH1L	7.55162	7.56633	6.9989	7.86217	7.536	7.18151	7.41996	7.14654	7.26035	6.91676	7.28092	6.72617	8.14131	7.64357	6.93289	7.08738	7.12852	7.17406	6.72243	7.20273	6.6461	7.44366	6.77386	7.16057	6.4146	6.58862	7.02614	7.38423	7.24854	7.29272	7.40116	7.39591	7.55525	6.75833	7.19982	6.53466	7.33371	7.05003	7.63049	6.72575	7.59051	6.99487	7.30843	6.92842	7.52874	6.71349	6.78466	7.53844	6.95807
ASH2L	7.90988	8.08406	7.36238	7.98422	8.16466	7.94951	8.05117	7.77266	7.89755	8.09969	7.66326	8.28244	8.43366	7.98422	7.50818	8.27048	8.15507	8.24067	7.69361	7.91958	7.9905	8.05197	8.01898	7.92108	7.75712	7.94553	8.18131	7.4505	7.66971	8.22963	7.69748	7.93985	7.25173	7.94693	8.18131	7.48699	8.09389	7.71595	7.91806	7.52069	7.83554	7.91263	8.17948	7.67496	7.92985	7.64803	7.62545	8.13375	7.6569
ASIP	5.89637	2.75964	2.22826	3.91777	5.01164	4.3161	4.75573	4.72252	4.5277	5.22092	5.06138	1.08189	3.4535	4.51465	5.55514	2.93517	3.71691	5.97409	3.46015	2.74839	2.95163	3.2026	4.93001	4.46123	3.67958	3.75648	4.62001	4.05914	5.17389	4.51295	5.28774	5.15521	2.26211	3.29562	4.25586	3.89282	5.21828	3.16037	2.86712	3.42272	3.43939	2.72408	5.21903	6.35062	4.41546	6.41274	3.54325	3.83701	4.21359
ASL	5.48194	6.22709	6.53193	5.74415	5.60865	6.36332	5.62709	6.00884	6.44108	6.32745	5.88183	6.11633	5.95819	6.27419	5.64642	6.29893	7.00699	6.0363	6.12259	6.49935	6.61601	6.19231	5.64886	6.17395	6.28823	6.87442	6.52777	5.59908	6.20795	5.6503	5.57916	5.98241	5.86377	6.13615	5.97374	6.69086	5.96003	5.84838	5.70836	5.7259	5.45612	5.16293	6.12511	6.4821	6.29275	6.19841	6.06374	6.22171	5.91615
ASMTL	6.63883	6.9631	7.46551	6.95715	7.02562	7.42061	6.89301	7.77406	7.05856	6.87442	7.80397	7.39942	7.1661	7.42856	7.31679	6.8358	7.10226	7.28352	7.59767	6.90135	6.94895	6.75965	6.95544	6.75792	6.62546	7.70724	7.48471	6.77874	7.23124	6.95807	7.05765	7.21478	7.05236	7.536	7.55747	7.64745	6.9324	7.13544	7.28987	7.5334	7.58856	7.97869	7.62545	7.85933	7.38309	7.65108	7.58665	7.06047	6.69677
ASMTL-AS1	1.59704	1.55975	1.64681	1.65166	1.59059	1.59345	1.59345	1.6023	0.620975	1.69668	1.20435	1.77967	1.54122	2.09263	1.51699	2.64545	2.00676	1.1934	2.36785	3.37742	2.14988	0.82737	1.26634	2.64135	1.49317	1.40131	1.52024	1.61247	1.63316	1.73503	1.41969	3.0887	1.66735	1.47397	2.03962	2.8247	2.3308	3.71419	0.542657	2.34303	1.80531	3.73139	3.25065	4.08546	1.60184	2.73121	4.29868	2.60577	1.98589
ASNA1	6.67629	7.05518	6.55777	6.54713	6.66616	6.4764	6.40002	6.71653	7.61544	7.61984	7.18711	7.3306	6.78257	7.2237	6.83886	7.17406	7.49879	7.7845	8.00712	7.1987	6.53028	7.33371	7.17697	7.38921	7.15413	7.81969	7.26639	6.9801	7.18046	7.38809	7.27403	7.26795	6.88369	7.24533	7.28258	7.30284	6.97478	6.57972	6.17753	6.81147	7.25341	6.92122	7.29321	7.42403	7.59767	7.27457	7.32751	6.71865	6.92252
ASNS	5.00236	5.52399	5.33788	4.99323	5.27642	5.59369	5.6073	5.63089	5.18913	5.67618	5.14579	4.65231	4.82325	6.42225	6.91335	4.89361	5.12501	4.61267	4.49477	5.33975	4.75651	5.39048	4.47758	5.22937	5.75712	5.06981	4.35015	5.15786	5.51375	5.41809	4.46306	6.20172	5.41107	4.99116	5.38244	5.63768	4.33848	4.47839	4.54124	4.1725	6.03492	6.35651	4.93794	4.88604	4.86104	4.70193	5.37267	5.30839	5.16486
ASNSD1	8.21738	8.21738	8.01739	8.31848	8.49666	8.44177	8.73906	8.38296	8.28432	7.74178	8.34675	8.04787	8.24163	7.98343	8.24163	7.84128	8.31085	8.13128	8.18223	8.00784	8.58482	8.34866	8.87837	8.33408	8.24363	8.18869	8.41879	8.65439	8.05592	8.28523	8.38296	8.00712	8.14973	8.35627	8.14201	8.44177	8.27794	8.74319	8.12109	8.26949	8.16031	8.3702	8.21475	8.53808	8.1063	8.08406	8.3702	8.45678	8.12875
ASPA	3.95751	4.6157	4.77391	4.63679	4.71365	4.64787	4.79632	3.01612	3.31522	3.35568	4.41713	3.6512	5.31562	2.81094	4.21076	4.81052	4.7778	4.58597	5.29195	5.24101	5.55149	5.11492	4.4163	4.20483	4.34708	4.72042	3.54115	4.32372	3.81403	4.85436	3.98088	4.12907	5.94878	5.11769	2.37755	2.44717	5.49156	4.7774	4.95629	4.36126	4.60281	3.2026	5.28009	4.69575	3.14449	3.64969	5.49424	4.47278	4.74916
ASPDH	4.393	1.52579	2.37644	1.10944	4.27863	4.6662	2.96568	1.0925	3.75129	1.30686	2.8932	3.31052	2.3802	4.24829	1.77784	4.1653	3.55729	4.01998	3.94271	0.118359	4.25118	3.32978	1.23975	3.25912	5.83468	3.85682	4.7569	4.11314	3.08343	2.84878	4.40715	3.5927	2.0209	-0.316675	2.55175	4.36216	1.23391	1.95199	4.38552	4.58597	3.42217	3.50799	2.26815	4.47642	3.76798	1.16655	3.94371	3.98088	2.16686
ASPG	1.96855	1.8993	2.00193	2.04589	1.93525	1.9292	1.93177	1.95712	2.23196	1.32679	0.828214	1.18584	0.528014	2.5983	3.2271	0.992873	1.04649	2.36328	1.77218	2.02786	1.18528	2.05707	0.873602	1.45648	1.47505	1.97049	1.75121	2.61891	2.3489	3.02726	2.05928	3.11059	1.11724	1.14205	3.12074	1.39188	1.90173	1.69776	1.71255	1.5923	0.293945	1.86549	0.726979	0.953347	1.81704	1.00041	1.45393	0.217317	1.21592
ASPH	7.37398	7.22522	7.10845	7.25985	7.54918	6.97606	7.269	7.43805	7.19982	7.10175	6.70763	7.02389	6.47357	6.63452	6.67108	7.01164	7.36086	7.21081	7.0088	7.44086	7.3777	6.81546	7.14811	7.36287	7.67302	6.70347	7.00747	7.18874	6.34155	7.37298	6.91375	7.13246	6.86607	6.96718	6.92796	7.23221	7.21952	7.40746	7.10463	7.05856	6.87841	7.31784	7.20521	7.27571	6.90652	6.87259	7.53539	6.89693	6.72316
ASPHD1	0.674886	3.21541	4.05124	3.11758	2.46051	3.11887	2.65732	2.77355	2.30362	2.40113	2.87321	3.11758	3.14566	3.28507	4.52453	3.03267	4.08132	1.74033	5.00609	0.507015	0.795586	3.7127	1.80923	3.5349	4.22829	4.64447	0.424199	3.93285	3.95184	4.61779	3.14259	2.01033	3.63513	0.98731	1.02955	1.01205	4.11886	1.13068	3.34008	3.39286	4.02184	3.80822	4.35495	0.281259	3.61358	1.20159	2.89021	2.0209	1.01921
ASPHD2	3.80681	3.3004	0.44734	2.91897	3.55832	3.09864	2.48876	3.37282	3.4992	3.14189	3.70831	3.62033	3.37852	3.23543	2.29987	3.6683	3.23362	4.52233	2.51809	4.33396	0.80109	4.11965	3.60114	2.98982	0.721066	1.96402	2.8117	3.45792	2.24198	1.97387	3.47327	2.68791	1.83601	3.13544	3.60864	3.32729	3.60271	3.39343	4.30178	2.44717	3.71047	3.97709	3.68291	2.86956	3.16557	3.23543	4.34209	2.18399	4.17485
ASPM	2.84058	2.3308	3.54325	2.58821	0.551327	2.96649	2.85506	3.20559	1.45288	1.2472	1.84268	3.14322	2.14515	-0.0390256	1.74442	4.17815	3.47697	2.6132	2.59227	3.28889	1.12012	1.51034	3.35922	2.36328	1.0497	2.91964	2.32687	2.79931	1.66796	1.41046	1.46094	1.6572	2.96366	3.24103	1.50336	1.95437	3.01861	2.6746	3.33219	2.6002	3.03073	1.30637	2.79453	3.90658	2.8389	2.55886	3.09672	2.77005	4.16297
ASPN	6.87218	7.63561	7.09506	6.30784	7.38809	7.84794	7.53225	7.28046	6.72525	6.91416	9.18647	7.77067	7.92035	7.29639	7.43978	8.5318	8.09389	7.70844	8.28338	7.8454	7.31632	6.13692	6.17284	7.96551	7.28352	7.63617	7.72457	6.75833	6.72443	7.10755	7.02518	7.37355	9.89841	9.17817	8.56154	9.17412	8.10131	7.06047	7.46972	8.78385	8.724	8.7974	8.00487	8.89407	9.27411	8.92556	8.8409	8.97798	8.94028
ASPRV1	4.96789	4.87487	4.55504	3.55675	5.36742	5.24487	4.5629	5.19161	5.3701	4.56508	4.15556	4.98331	4.31476	2.13138	4.90433	3.89089	4.14579	4.47954	3.85584	4.28165	4.86916	4.51295	4.46209	4.45686	4.8667	4.31432	4.03129	4.33441	5.06384	4.06968	4.66102	4.29735	4.7671	4.87329	4.91714	4.62384	3.82756	4.9484	4.36488	5.03562	5.0007	5.21639	4.69623	5.40954	4.37318	5.32925	4.26447	4.68895	4.55029
ASPSCR1	2.04381	3.49173	1.75786	1.76455	4.55275	4.87213	1.69776	3.00161	4.32238	3.84932	4.19144	2.90544	3.13239	3.02726	0.146087	3.79741	3.59568	4.1882	1.43002	3.54272	4.63251	2.22957	3.34243	2.92326	5.2266	4.51507	4.0002	4.29648	4.04495	4.0919	3.97355	4.14715	2.70007	4.0092	4.21489	4.65816	3.63961	4.66879	3.67748	4.35103	1.15894	4.48088	3.47874	4.94297	3.23118	5.09779	3.6366	2.85804	2.44832
ASRGL1	1.31002	5.72257	4.29692	1.3597	2.80763	5.85473	5.34673	4.67851	5.7852	4.34836	4.44353	4.05315	4.17196	7.20322	5.72806	4.92147	3.98759	5.07763	4.42507	5.76081	4.84395	4.56508	3.69644	4.45772	5.03107	3.2319	3.3478	5.69632	5.42483	3.79741	6.05859	4.23601	3.51892	3.47094	3.94859	3.29368	3.54689	2.75305	4.28039	2.08826	2.09584	3.38306	0.753074	3.31222	3.27629	2.40487	3.79741	2.83806	4.66188
ASS1	7.39998	7.15369	7.10325	7.57664	7.2413	7.35803	7.14462	7.0399	8.53551	7.9188	8.40869	8.48109	7.04242	8.51087	7.84954	7.99527	8.29384	7.74119	7.69687	7.53982	7.92345	8.5075	8.47769	8.20775	8.28821	8.36325	6.71432	7.54273	8.60702	7.7999	8.52321	7.93142	7.56454	7.61055	7.30036	7.5182	7.37826	7.43337	6.55339	7.5598	6.84013	7.27079	7.07685	7.41338	8.20843	8.29104	7.26088	6.91765	8.55158
ASTE1	5.20409	5.25126	5.65804	5.40662	4.98939	4.92108	5.22014	5.32492	4.4305	5.60973	4.84432	5.59339	5.19428	5.71937	4.54039	5.42307	4.51802	5.42733	4.95095	4.98826	5.24637	5.86297	4.95253	5.30601	5.10801	4.96329	5.30985	4.63021	4.91507	5.10619	4.67171	5.24177	5.63327	5.31087	5.55149	5.32298	5.36484	4.3953	5.56324	5.29762	5.18645	4.89754	5.41354	4.72294	5.55964	4.84996	5.63799	5.42103	5.07608
ASTN1	1.91708	3.8246	4.12773	3.84376	3.16353	1.03876	3.86463	2.01796	3.11336	1.2355	2.69052	1.14262	2.8084	-0.201158	1.48994	0.371276	1.27868	1.0269	2.48558	2.02194	3.48002	3.53605	1.59116	3.3854	2.19672	2.02994	2.87994	3.09726	0.849098	1.46527	1.6584	0.940641	4.20171	4.04982	4.1663	0.211608	3.85478	2.37014	2.94789	2.94069	3.8457	3.74945	3.8107	3.96609	1.11888	1.62676	3.25197	2.17023	1.82391
ASTN2	4.36087	4.00474	3.9623	3.10431	3.99683	4.60739	4.25586	4.84432	4.5975	4.94207	5.31637	4.2886	4.32329	3.58808	3.12744	4.04018	4.22571	3.99057	4.33396	4.60448	4.90713	4.46394	4.25022	4.80652	3.84224	3.98573	4.0969	5.11699	4.46166	4.34792	4.3274	4.48501	4.46778	4.40256	3.86559	3.39163	3.74128	4.33396	3.72005	4.13444	4.38508	4.5639	4.95672	5.33936	4.29181	4.82199	4.54641	4.02472	4.16053
ASXL1	5.74382	5.88852	5.32565	5.6883	5.43365	5.51518	5.43894	5.61213	5.93626	5.46197	5.79115	5.35049	5.78452	5.66785	5.66581	5.87887	5.46541	5.55063	5.69038	5.69855	5.72623	5.58334	5.80642	5.54275	5.75673	5.45752	5.21977	5.7211	5.67305	5.3571	5.93418	5.36707	5.60382	5.34597	5.60599	5.0488	5.67545	5.19625	5.42034	5.39325	5.57656	5.48509	5.47111	5.41848	5.70587	5.0044	5.86547	5.44952	5.44081
ASXL2	5.97481	5.6239	5.95966	5.83504	5.56253	5.70117	5.88744	5.39175	5.26307	5.35603	5.90773	5.5283	6.03243	5.28009	5.71479	5.92776	5.21075	5.7976	5.48403	5.56639	5.5889	5.60159	5.28239	5.6154	5.65061	5.30798	5.66752	5.81229	5.08003	5.64642	5.35745	5.47547	5.62502	5.34164	5.78562	5.23627	5.70656	5.44464	6.04317	5.40483	5.62644	5.82157	5.67545	5.67653	5.84414	5.69632	5.45299	6.00579	5.64146
ASXL3	3.48892	3.25451	3.68291	3.03267	4.33532	3.45577	4.15247	3.86957	2.39982	2.13337	2.1144	1.68697	1.68113	3.937	2.80274	3.69059	2.17635	2.71591	2.41412	3.48377	2.84058	3.5125	1.91043	3.50402	0.777929	0.0883124	4.32329	1.01797	2.52183	3.80128	3.14934	3.88954	2.94714	2.42081	1.16428	1.61187	3.09794	3.15061	2.86391	3.02067	3.9394	3.74426	3.74839	3.26497	2.32933	1.62442	3.15332	3.30464	2.86801
ASZ1	0.652611	0.546272	0.697605	2.52072	3.16746	0.672696	2.50536	0.689059	1.05843	0.961571	0.178667	1.17792	1.63732	3.00435	0.945907	2.95812	1.75486	0.779831	1.71082	1.025	2.74919	2.60121	0.677107	0.0719055	1.18465	1.60407	0.841215	3.12368	0.93316	1.20385	0.86356	0.84748	0.23674	1.4734	-0.000785066	1.33261	0.196141	3.14449	0.364861	0.0455075	0.183825	3.53068	0.834029	0.499399	2.94137	1.38269	0.928173	0.797891	0.849834
ATAD1	8.84855	8.87246	8.69079	8.90821	8.85616	8.59535	8.72819	8.58609	8.87837	8.96203	8.47439	8.37715	8.65177	8.81755	9.13673	8.25408	8.74596	8.97976	9.0212	8.49067	8.92233	8.85468	8.82493	8.89239	8.62639	8.79275	8.67214	9.0299	8.85929	8.76702	9.00043	9.16661	8.2228	8.86233	8.45792	8.57329	8.88638	8.9354	9.00537	8.6437	8.49195	8.93047	9.0746	9.12717	8.85774	8.87068	8.68391	8.71997	8.22196
ATAD2	7.05518	6.2849	6.24458	6.16654	6.16654	5.7277	6.45384	5.35783	5.39976	6.00018	6.21677	6.06887	7.18577	5.06303	5.27781	6.40816	6.58131	5.95055	6.01392	5.59801	5.44697	5.66581	5.69342	5.50269	5.09589	5.548	6.01064	5.99921	5.26938	6.11087	5.61506	7.02249	6.19123	6.6009	5.98748	6.24535	6.36702	6.10028	6.05319	6.09596	5.86741	5.91363	6.79371	6.76302	6.02699	5.88105	6.36631	6.38792	5.5272
ATAD2B	4.9492	4.68522	3.71047	4.06968	4.46991	3.6738	3.94222	3.53162	3.22415	3.5822	3.4928	3.62243	3.86081	3.98615	4.54809	3.3478	3.92405	3.51687	4.01352	3.69004	3.59831	3.73763	3.36717	4.41713	3.61358	3.88282	3.81961	4.91993	4.03555	3.35568	4.02853	4.36216	4.49655	3.67658	4.15339	3.31757	4.01951	4.46258	4.99072	3.38369	4.39077	4.10957	4.49698	3.33565	4.71634	3.89653	5.36271	4.93234	4.48127
ATAD3A	5.87143	5.52756	4.99365	5.26861	5.27852	4.92185	5.145	5.06705	5.64256	5.97338	5.23005	5.23918	4.62895	5.12256	5.65838	4.9572	5.59445	5.48509	5.30877	3.23118	5.34708	4.92108	6.11087	4.07426	5.63364	6.31655	5.02671	5.79728	6.01064	5.32994	6.62146	5.2927	3.85732	5.54726	6.11127	5.62431	5.9828	6.36254	4.22977	6.18831	4.30443	6.46867	4.9396	6.05939	3.34832	5.75635	6.21792	4.13719	4.34836
ATAD3C	1.82669	1.7765	1.86626	1.89285	1.80075	1.80266	4.20748	1.82175	1.84323	1.96668	0.519537	2.05404	1.45023	2.90544	3.33334	2.70007	1.3471	1.35629	1.13426	0.90998	3.35738	0.503243	1.76212	3.55623	4.71959	1.72321	3.9847	3.60757	3.54167	1.20435	3.3695	1.7555	0.576236	0.279257	1.37522	1.6643	0.928173	1.57834	2.00086	2.87919	3.04295	0.773792	2.049	1.16302	3.55729	2.31105	2.72229	1.87154	1.08756
ATAD5	5.08043	1.63147	4.92699	5.55584	3.71368	3.93895	3.26733	4.41078	3.60443	3.15627	3.0771	4.61656	3.33392	1.6858	4.38284	1.709	1.58943	3.16158	4.036	3.12074	2.61803	3.45577	1.03091	3.59328	3.35674	3.06292	4.33483	1.79898	2.84656	2.29861	1.99984	1.80531	4.08087	3.83799	3.38988	3.9992	3.39227	4.13587	3.45515	3.51411	4.64574	2.22608	4.45772	4.06162	4.10913	-0.0879038	3.09604	3.6492	4.41892
ATAT1	4.54733	3.90005	4.04794	3.02211	3.43606	3.38988	3.60757	3.65836	3.49664	4.40845	4.254	3.77468	5.05693	3.80636	4.76054	3.86612	3.45235	3.99726	2.08826	4.03885	1.94338	4.16715	4.71071	4.26621	4.9008	4.04251	3.62532	3.97083	4.83866	3.33392	4.48719	3.88282	3.70472	4.57037	4.16881	3.78176	4.09001	4.34345	3.9342	3.87371	4.25956	3.7669	4.32283	4.43227	3.69256	4.22021	3.96087	3.91369	4.61825
ATCAY	1.3089	2.83729	1.36564	4.0186	1.31732	4.71159	1.31179	1.33142	1.60055	1.03551	0.679428	1.44637	1.31944	2.55572	1.45342	2.04381	1.73503	0.95477	2.97742	1.71838	2.27289	3.18049	3.62917	1.83601	1.22471	2.23073	3.17116	2.1205	1.52579	1.79418	1.45288	1.33486	1.75244	4.27962	2.27424	1.41579	0.487369	1.2967	0.463947	-0.378733	-0.121723	2.85655	2.34076	3.56948	-0.246945	4.76413	3.11758	1.71314	1.54756
[truncated: 15,161 more rows]
[truncated: 66 more columns]
