# Supplementary material for: Multiple effect mechanisms of FLNC in dilated cardiomyopathy based on genetic variants, transcriptomics, and immune infiltration analysis
Source: Research Square preprint supplement (doi:10.21203/rs.3.rs-2795537/v1), 2023-04-12
Supplement: Supplementary file 6 [file d1075ae5e0833b5348f8c0e3.xlsx]

## Sheet: merged  
Four datasets, GSE84796, GSE29819, GSE42955 and GSE120895, were merged, normalized and 32 normal myocardial tissue samples were removed.
geneNames	GSM739002	GSM739003	GSM739004	GSM739005	GSM739006	GSM739007	GSM739008	GSM739009	GSM739010	GSM739011	GSM739012	GSM739013	GSM739014	GSM739015	GSM1053915	GSM1053917	GSM1053918	GSM1053919	GSM1053924	GSM1053925	GSM1053926	GSM1053933	GSM1053935	GSM1053937	GSM1053938	GSM1053941	GSM3417944	GSM3417945	GSM3417946	GSM3417947	GSM3417948	GSM3417949	GSM3417950	GSM3417951	GSM3417952	GSM3417953	GSM3417954	GSM3417955	GSM3417956	GSM3417957	GSM3417958	GSM3417959	GSM3417960	GSM3417961	GSM3417962	GSM3417963	GSM3417964	GSM3417965	GSM3417966
A1BG	3.60613	4.58239	4.17609	4.12413	1.60028	5.12193	1.76435	3.21377	5.54725	4.78816	3.38108	2.73724	1.70085	5.15101	5.05354	3.58145	3.59395	2.59429	3.85753	4.31611	4.7373	3.88295	2.309	3.815	3.91041	3.28563	3.86231	3.16841	3.36666	4.03689	3.75301	4.07941	3.68663	3.89287	3.50912	5.04816	3.5776	4.03169	3.57109	0.468653	4.21617	2.96992	3.94844	3.74197	2.95973	2.34819	0.446691	1.71473	3.85459
A1CF	3.53206	3.70203	3.74441	1.97925	3.01712	0.158611	3.27239	3.90471	3.94896	2.39843	3.97155	2.57407	4.10837	3.75149	3.14001	3.55598	3.36265	3.71039	3.32226	3.35738	3.08011	3.61179	2.89703	3.65413	2.62254	3.75948	1.93592	3.70254	2.58996	3.85502	2.40327	4.39226	3.12938	3.70254	0.560386	5.38609	4.14702	4.11465	4.85763	1.57781	3.0553	3.32634	4.51828	4.05647	4.33265	5.06042	3.60279	3.53711	0.663459
A2M	9.67392	9.71829	9.34121	9.20159	9.19972	9.2361	9.6525	9.60684	8.87173	9.10928	9.0965	8.98474	9.25559	9.10401	9.11278	9.091	10.1984	9.21671	9.37373	9.2384	9.02152	9.40765	9.0965	9.12932	9.03745	9.55815	9.11469	8.84079	9.25726	9.19109	9.10928	9.33634	9.54803	9.66381	9.15271	9.97698	9.05947	9.39486	9.39486	9.11111	9.31057	9.60985	9.95273	9.72442	9.51418	9.81259	9.45265	9.36412	9.66381
A2ML1	0.96243	1.94429	2.02748	3.22808	2.48878	4.28582	3.98374	1.05884	3.45235	3.14126	4.08876	3.13295	3.71541	3.90471	1.30589	1.9202	2.8211	2.54672	3.81933	2.78253	3.03843	3.41499	2.36904	2.61065	2.5415	3.47085	2.13962	2.50941	3.42571	4.10699	3.47833	2.42836	2.42157	5.13755	2.79215	3.9649	1.89562	0.578668	2.96395	3.57707	3.57337	2.99029	5.38728	4.07941	3.01426	4.16825	2.20333	3.76446	2.78253
A4GALT	4.73688	3.85027	3.41222	4.0714	4.60042	1.5488	3.14954	3.44155	4.67135	1.97821	3.76397	3.73994	4.28751	1.44237	4.64613	4.21837	3.63812	4.32599	4.35466	5.33975	3.6128	3.23673	2.70727	2.30621	3.38157	3.68998	5.00744	4.47804	1.33319	1.3678	1.38549	4.63838	3.44869	5.10248	2.16178	2.93222	3.66051	1.33741	1.35091	2.93642	4.99261	4.60824	1.39133	3.88582	3.99899	2.54672	4.55401	4.99592	4.3832
A4GNT	4.0295	4.29818	4.44756	4.14509	4.30144	4.24159	4.2779	4.02706	4.48051	3.52804	4.14416	4.62026	3.98964	1.71284	4.54947	3.73625	4.01306	4.21837	3.9958	3.93347	4.07051	3.72387	3.88535	4.32936	4.05048	4.39007	4.57554	4.46718	4.26866	3.43614	5.0099	3.40544	4.29227	3.84253	3.76957	3.62056	4.17665	4.58567	4.92136	3.61999	3.97234	4.0883	3.71135	3.54027	3.90673	4.43882	3.88987	3.19206	3.08435
AAAS	5.26746	6.13255	3.01772	4.92659	3.91941	3.43	4.99984	5.99481	3.28135	3.84497	4.25605	1.17672	3.16269	5.67988	5.4553	5.26945	4.61392	4.20516	3.51881	3.89426	4.51489	5.24741	4.30366	4.37948	4.55362	4.16245	3.97949	5.20565	5.32318	5.60614	1.17121	5.16619	1.09347	4.83607	5.13755	4.24399	5.11842	4.41812	1.13748	1.13908	5.23088	4.92181	5.22313	4.93097	6.07282	1.24674	5.67589	6.05162	5.85711
AACS	5.20176	5.61184	6.3042	6.23119	6.30179	6.2613	5.76031	6.48011	6.33116	6.35668	6.73827	6.66959	6.51623	6.54501	7.04	6.03823	5.53285	6.39642	6.00869	6.11961	5.62039	6.83062	6.51701	6.48181	6.79322	6.64365	6.36646	6.64295	6.2884	6.65341	6.72323	6.45255	5.71384	5.95183	6.3319	6.06657	6.44442	6.57412	6.41915	6.24736	6.40146	6.66238	6.321	6.43164	6.10981	6.4053	6.5174	6.62016	5.98208
AADAC	1.82939	0.466612	1.00827	3.0637	3.83734	1.67834	1.78849	0.833126	0.584619	3.58145	1.59803	1.16858	1.12896	0.154631	1.08052	0.710002	1.1805	0.655723	1.13065	0.0302225	1.64958	2.03351	0.964392	1.14448	1.53559	1.06015	3.35105	0.84206	2.32774	3.56491	0.916015	0.922622	0.854023	2.54357	4.23215	1.07436	0.85031	2.52108	2.27953	2.38036	0.863789	0.884243	3.17328	0.995048	0.881958	2.97587	0.844246	0.828316	0.856502
AADACL2	1.58122	0.817957	0.201792	3.39073	0.170394	1.62541	1.11328	0.179547	2.62254	3.82579	0.211807	0.22075	2.57506	0.164216	1.56914	1.72231	2.40327	1.31142	1.57205	1.12557	1.68435	1.41203	1.18107	2.29306	0.270561	1.43559	2.78612	3.04647	3.32634	0.438287	3.39747	2.23843	2.07859	0.427274	1.99171	2.62063	0.961197	0.489294	0.440577	0.446691	2.24925	0.481487	3.31291	3.3879	0.458605	2.42413	1.85854	0.405388	0.466612
AADAT	1.97925	4.41682	1.63674	3.99765	4.11544	1.58283	3.6526	3.72742	3.01849	3.69395	2.80889	1.39694	4.08789	1.18107	3.71779	3.94347	1.61024	1.24214	2.04753	1.73805	3.8689	4.87114	3.94164	2.98496	2.25841	3.4964	1.15528	3.96389	1.15693	2.73125	3.14675	4.67439	1.13748	4.07182	3.70103	6.33231	3.44214	3.44595	2.69997	3.956	1.17568	3.38395	1.21541	1.29832	3.28448	3.23274	1.14873	3.72535	3.95454
AAGAB	4.88959	4.97402	4.91362	5.48986	5.46567	4.9391	4.79792	5.13322	6.04992	5.43263	4.6228	5.26523	5.99516	5.27412	4.66884	5.84579	5.51091	4.99709	5.45728	4.98691	4.39995	5.02236	6.46882	6.28052	5.5579	5.31704	4.60159	5.13088	5.88933	5.11805	5.29407	5.67222	5.13824	4.56842	5.3055	5.04427	5.47496	4.94598	4.39362	5.59501	4.93142	5.38288	5.06862	2.12031	5.20133	4.43702	5.08683	4.89189	5.1464
AAK1	6.25297	6.17189	6.86975	6.33528	6.41196	6.06105	6.84125	6.15677	6.6585	6.48996	6.33459	5.84548	6.78914	6.57725	6.48922	6.10085	6.15576	6.06034	6.29794	6.2	6.27612	6.37791	6.27006	6.49264	6.41078	6.12034	6.00721	6.24154	6.61572	6.02489	6.39987	6.52766	6.46761	6.0999	6.06514	6.37327	5.93146	5.80309	6.1218	6.68352	6.45807	6.55403	5.99931	6.24154	5.8972	5.69443	6.33611	5.8228	6.34837
AAMP	6.21664	6.60502	6.23273	6.28536	6.11048	6.41674	5.73919	6.23197	6.53199	6.87163	6.6585	6.76208	6.15539	6.90661	6.31051	6.09552	5.78769	6.06001	6.59675	6.215	6.75902	5.71874	6.24247	6.37523	6.65262	6.47854	6.3764	6.50954	6.59106	6.2191	5.75179	6.68736	6.02283	6.04253	6.27148	5.76236	5.8245	6.71946	5.70825	5.91543	6.53981	6.20439	6.21461	5.76385	6.47971	5.91887	6.62509	6.42301	6.43634
AANAT	0.832387	1.77359	1.02716	1.36718	0.920742	1.43661	0.218078	0.76251	0.951068	0.796228	0.895628	3.24419	1.81146	0.394939	1.20105	0.818873	0.192217	0.605982	1.05068	0.205677	1.73229	0.811578	0.580147	0.119611	2.51999	0.687821	3.44414	1.24007	1.26981	2.23987	1.32008	3.47495	1.24214	1.29348	1.25161	1.48122	1.25564	1.26981	4.51324	1.29023	2.72916	1.2737	1.32157	3.29167	1.29216	1.39751	1.25457	1.24674	1.25161
AARS	8.07484	7.96126	7.39617	7.54046	7.82627	8.02654	6.68511	8.18529	7.83621	8.03072	6.48605	8.10794	7.47856	8.04919	7.60003	7.224	7.33328	7.59865	9.32808	7.53402	7.65748	6.97501	6.52205	7.54879	7.04147	7.3843	7.43039	7.49469	7.38478	7.853	7.01924	7.93027	7.58555	7.23247	7.64126	7.89364	7.0281	8.05508	7.03903	6.37791	7.75743	7.97791	8.28504	8.49656	8.04761	8.18602	8.13913	7.96052	8.22753
AARS2	4.70672	4.4497	5.31818	4.6368	5.12464	4.36795	5.19902	4.82	5.5828	4.45912	5.15395	4.64065	4.9986	4.87444	4.89831	4.53203	4.55494	5.14329	4.80496	5.00302	4.84493	5.98496	4.40529	4.78172	5.24593	5.92927	4.87233	3.7605	0.424771	4.50046	4.533	5.05132	4.3118	4.21837	4.76593	4.94476	3.76905	4.49999	4.49585	3.62494	5.09791	4.72815	0.518006	4.31932	5.05967	3.64214	5.45271	4.76332	4.9359
AASDH	5.78769	5.69978	5.60882	5.32436	6.1445	5.5903	6.13144	5.48063	6.10165	5.39865	5.91851	5.50635	6.0878	5.51852	5.24707	5.88796	5.75356	6.04581	5.32557	5.7288	5.17764	5.98999	5.99695	5.65989	5.67253	5.71283	6.14777	6.07246	5.7053	5.72743	6.22192	5.81164	5.40499	5.69473	5.65063	5.86048	5.93217	5.88081	6.00828	5.75593	5.64094	5.46234	5.70381	5.60398	5.64968	5.64845	5.87132	5.62611	5.60647
AASDHPPT	7.56337	7.58914	7.21471	7.53573	7.37388	7.56576	7.56157	7.38647	7.14053	7.49191	7.2276	7.33688	6.94629	7.42979	6.74713	7.64832	6.87015	7.17891	7.32123	7.08332	7.22971	7.0541	7.52366	7.3826	7.35011	7.46621	7.39737	7.48457	7.73445	7.66001	7.78617	7.33047	7.34415	7.35011	7.54168	7.35908	7.42235	7.09405	7.55623	7.61931	7.23306	7.07448	6.64365	6.86657	7.0527	6.98484	7.00124	7.17471	6.93224
AASS	6.06763	5.44256	4.84457	5.1499	5.71283	5.41228	5.64602	4.95159	5.45391	4.89764	6.35562	6.15144	5.90743	5.33355	5.922	5.41046	4.9286	5.42862	5.36222	4.98127	5.53864	5.62004	5.36435	5.5428	5.51337	5.65989	6.03261	5.89481	6.23576	5.47427	5.51221	5.73777	5.89033	5.32198	6.18994	6.08682	5.19444	5.14678	4.17985	5.65625	5.94379	5.7288	5.14446	5.20017	5.61289	5.27188	4.73425	5.01272	5.29627
AATF	5.64883	6.27425	6.62701	6.30674	6.03024	5.86765	6.4278	6.69373	6.41335	6.71335	6.29506	6.55818	6.41265	6.70231	5.79485	6.44634	7.08972	5.96286	6.56424	6.13291	6.20335	6.29831	6.23381	6.33983	6.42848	6.65606	6.3135	6.14812	6.46365	6.16638	6.15372	6.60187	6.54226	6.35632	6.72058	5.90844	6.00941	6.35122	5.77878	6.31792	6.53164	6.76256	6.72882	6.33493	7.10272	6.66065	6.50519	6.5628	6.67674
AATK	5.92234	4.98509	6.25583	5.50153	5.59426	6.12775	6.09735	5.79254	6.45656	6.33493	6.17916	6.61238	5.27225	6.53312	5.95372	5.89481	5.27084	6.48373	5.77264	6.70951	6.26091	6.27503	6.11927	6.01236	6.19214	5.55309	6.08682	6.46365	5.92503	5.79517	5.75291	5.77835	5.84757	5.67123	6.07066	6.86567	5.89861	5.76657	5.45078	6.00608	6.76644	5.38836	6.56699	6.38371	5.85414	6.96024	6.26553	5.55112	5.42047
ABAT	7.35235	7.52073	7.15332	7.05503	6.3225	6.36074	7.65359	7.3745	7.43491	7.61254	7.63945	7.09457	7.39791	7.24018	6.05855	7.64579	5.89301	6.5699	6.85628	6.66407	6.26929	6.55732	6.03261	6.74949	7.82907	6.57496	7.5494	7.23754	8.10794	5.49338	7.52737	6.17444	7.55518	6.87645	6.90621	7.1818	7.00403	6.17335	6.18386	7.01842	6.87993	7.55792	7.33636	6.68774	6.56204	6.99469	5.76683	5.41665	7.36577
ABCA1	5.60474	5.40713	5.85816	5.64747	4.63884	4.36991	5.57524	5.33071	5.77449	5.66462	6.01791	5.79651	5.97384	5.65125	5.95071	5.75523	6.6096	5.32478	5.52841	5.00621	5.54317	5.23605	4.70624	5.51632	5.06784	5.27225	5.42796	5.38609	5.32846	5.79683	5.6904	4.92591	6.21842	5.62315	5.38912	5.88513	5.62288	5.52435	5.95489	6.32174	6.01606	5.31975	5.40571	4.57951	5.70413	5.99144	5.24891	5.46607	5.2478
ABCA11P	5.68228	5.56124	5.89793	5.67692	5.92022	5.71947	5.39164	4.94354	4.83848	5.24741	5.87354	5.07654	5.12314	5.79357	5.73809	5.67495	5.31025	5.15811	4.68773	5.36366	5.67253	6.07108	5.41706	5.51902	5.02315	5.6904	5.69372	5.74165	5.50299	5.64845	5.63813	5.58176	5.70192	5.56559	5.4926	5.52918	5.45632	5.62288	5.87927	5.6841	5.31452	4.67969	5.30984	4.89441	4.85636	4.73652	5.11197	5.79552	4.85724
ABCA12	-0.136194	2.00306	-0.101176	2.227	1.87062	1.5664	0.601932	1.90623	0.803272	3.40325	-0.141423	2.1854	0.0184174	2.0414	0.906627	1.24445	0.716503	1.30728	1.28715	1.20854	1.00504	0.59327	1.47856	0.865866	1.66744	1.13581	2.42977	0.665298	3.40483	0.698918	0.7342	0.740315	2.91603	2.15683	0.657924	3.47031	2.35074	0.715463	0.716503	1.68614	0.711878	2.44403	0.776195	3.41732	2.83031	0.841207	0.669999	2.13442	2.30621
ABCA13	0.628927	2.0174	1.70262	1.91347	1.7087	1.38822	1.25509	1.59614	2.54357	1.52363	0.902902	2.84927	1.1385	1.40812	1.33427	1.39188	1.23628	0.871926	1.39694	0.88654	1.22189	1.5082	1.41495	1.10396	1.14873	0.768492	2.51355	2.8397	2.33751	2.7931	1.76254	2.6841	0.651607	2.18112	2.81337	3.77942	2.77919	1.30824	2.81426	2.18813	0.666568	0.820283	2.94233	2.81838	2.40807	0.790469	2.37296	2.07399	1.58283
ABCA2	3.30073	3.81453	3.20445	3.5511	3.01573	2.78954	2.20219	4.00418	2.63477	3.79899	2.57612	3.30675	2.94373	5.05283	1.56857	4.23891	3.36731	3.44973	3.42737	2.89078	1.44632	3.22808	1.8099	3.23144	3.85894	2.8279	1.91454	1.90354	4.58239	3.49154	2.9401	2.69896	1.88787	1.95788	1.90029	2.31623	3.05471	3.85616	1.93206	1.93766	1.93674	3.93347	4.69195	5.09153	4.01723	4.27441	4.13507	2.75001	4.48188
ABCA3	3.28685	4.02229	1.90739	5.14209	3.63756	5.65273	1.48682	4.27707	1.51083	4.64247	3.07381	5.0431	1.67896	5.90401	3.96909	5.16994	4.11241	4.32936	4.53605	3.21377	1.48791	2.8245	3.62787	3.17137	4.57999	3.72583	3.35154	3.75301	3.44258	1.89562	3.56906	3.22503	4.50091	0.791469	4.02314	0.973468	3.27296	4.03961	0.791469	4.46264	0.776195	3.92684	5.09078	3.55006	0.774384	3.38108	4.81202	4.91682	3.66884
ABCA4	1.49013	1.35091	1.71974	0.0430907	1.76191	1.2737	1.22989	0.992562	1.03207	1.40176	0.851838	1.69187	0.877622	1.13805	1.56589	1.5397	1.10905	1.40497	0.843367	1.3552	1.70635	1.54079	1.66503	1.12344	1.8247	1.19622	0.802509	0.783954	3.91041	0.819576	0.860889	0.869368	0.794646	0.838873	0.782313	5.61184	1.69971	0.821214	0.834431	3.15238	0.811578	1.29451	0.890126	0.940952	2.34702	0.94691	0.790469	0.770316	1.50419
ABCA5	5.92167	5.41596	6.25708	5.8245	6.23889	5.91543	6.31051	5.37749	6.25259	6.03574	6.58288	6.36341	5.93179	5.75829	6.37562	5.70454	5.5417	6.30796	5.8141	5.97168	6.12967	6.86022	6.08204	6.08314	5.41374	6.4514	5.98061	6.24534	6.22421	6.33569	6.21417	5.69236	6.05197	5.80828	6.41078	5.65925	6.07617	5.76344	5.94603	5.85816	5.66602	6.35817	5.16115	5.84616	5.82739	5.59501	5.82527	6.10085	5.42762
ABCA6	6.34017	5.88695	4.54125	5.46457	6.99566	6.64175	5.7462	6.1274	6.44174	6.55526	5.95372	6.19425	6.76688	6.38617	5.77796	5.76001	8.6062	5.68492	4.6735	7.01384	5.72446	7.06805	4.56464	5.65034	4.87516	5.42324	3.80712	6.01043	5.70413	5.32814	5.02189	5.84086	5.50153	5.92269	5.97769	5.51981	0.919431	6.41335	5.52189	4.11149	5.65884	6.17881	4.06046	5.14253	6.50785	4.70307	5.73809	5.14559	5.91158
ABCA7	4.19607	2.77075	4.11378	-0.0365815	3.9644	3.53934	4.37163	3.58712	3.74441	3.85183	2.66778	1.12456	3.70103	1.25367	4.54418	1.67615	3.80566	3.61753	4.19438	3.17079	2.79389	3.02418	2.49487	1.82096	3.93109	2.90178	3.78637	4.37814	1.18663	1.22132	1.24713	3.13507	2.72179	4.65948	1.17238	3.5068	4.82487	1.19417	1.20787	1.21382	4.93259	3.68139	4.23944	1.32817	4.85974	1.32008	3.02727	2.55105	4.12761
ABCA8	8.19029	7.48981	7.42913	6.87688	8.32992	7.95278	7.65599	7.70354	7.97943	7.98012	8.00771	7.71318	7.93538	7.70659	7.01924	7.47127	8.41236	8.12798	7.30872	8.41565	7.6034	8.51791	7.03151	7.51348	7.4958	8.00874	7.52859	7.55623	7.47309	7.91128	7.8068	7.79324	8.02902	7.94898	7.84519	8.2362	7.4388	8.05413	7.28423	7.54554	8.02902	7.31538	7.59409	7.62685	7.96201	7.55681	7.43156	7.74581	8.00771
ABCA9	5.33672	5.28844	5.85711	5.11305	6.05855	6.37791	5.91039	5.9335	5.68267	5.56837	6.48255	5.60709	6.03614	5.92269	5.78628	5.71067	6.49843	5.7152	5.25556	6.00039	5.79998	6.2533	5.54071	5.63711	5.25815	5.87392	5.90963	5.5041	5.11927	5.60286	5.31487	5.28299	5.88728	6.24426	5.27728	6.13037	5.05967	5.81164	6.45807	5.66881	5.52841	6.05963	5.73882	5.3735	5.70928	5.17637	5.41228	5.23284	4.90421
ABCB1	4.0883	2.25841	3.97521	2.89142	4.12594	3.77897	4.26908	3.88153	4.17002	3.42146	1.85362	2.84141	4.66454	4.80814	2.94601	3.78482	3.99899	3.75751	3.00534	1.79717	3.90031	3.51881	3.89692	3.25503	2.85276	3.66051	3.82425	4.43449	3.00051	4.10652	0.453029	3.99386	2.38842	3.58823	4.31356	3.13083	4.00038	4.42574	3.12149	3.70254	4.37282	4.52823	3.04936	3.94301	2.407	3.75046	3.87872	4.0421	3.92684
ABCB10	6.75119	6.40385	5.97384	6.61826	6.58799	6.87336	6.64799	6.65386	6.36929	6.82697	6.67122	6.46365	6.22192	6.09366	6.84254	6.12506	6.39675	6.86699	6.28873	7.20434	7.03289	6.54822	6.25779	6.19457	6.60024	6.09808	6.7484	6.64841	6.54025	6.98484	6.60024	6.33049	6.4389	6.99141	6.45332	6.96433	6.84695	6.56352	6.68428	6.63077	6.35281	6.57535	6.45453	6.68736	6.21876	6.83998	6.29254	6.35281	6.07465
ABCB11	1.19783	1.63447	0.29846	1.76435	0.0948065	1.25413	2.0242	0.909858	0.953964	0.655723	0.171855	0.757468	0.848866	1.38159	0.182165	1.63949	1.28111	1.34185	0.0447781	1.5082	1.13411	0.270561	0.902902	0.603373	0.653486	0.547405	0.949917	0.931682	1.82408	3.70795	1.01649	1.02046	0.937977	2.407	0.941631	1.17623	0.948671	0.970766	0.980098	0.974048	0.968427	0.980098	1.03207	1.09889	0.979523	1.09008	0.940409	0.927268	3.20694
ABCB4	5.57451	5.53898	5.68447	5.15248	5.36026	4.91009	5.311	4.69485	5.63879	5.42198	5.46203	4.64247	5.8724	5.54883	5.52589	5.91686	4.62835	5.46162	4.96001	5.69372	5.18034	5.35987	5.5332	5.87583	5.5049	5.42696	5.692	5.64164	5.53573	5.5527	5.08762	5.00221	5.83195	5.68192	5.70961	4.79287	4.9144	5.34251	5.81482	5.30805	5.93645	6.15987	5.5049	5.65165	6.08061	5.06741	5.58209	5.76972	5.20674
ABCB5	0.133683	2.47573	-0.847811	3.02418	0.755112	3.89188	1.22302	1.84115	1.07037	0.674124	2.28787	1.46172	3.24723	3.74595	1.70635	3.03775	1.43052	1.41547	1.13009	1.63559	0.790469	1.28822	1.61894	2.06701	1.52406	1.29023	3.37538	3.82282	2.23329	0.774384	3.83545	4.18246	3.68823	2.45789	2.81516	4.5773	2.25967	4.16332	3.16896	0.783954	2.5825	0.786285	2.60871	2.23843	0.771854	2.34567	0.748006	2.78253	0.760648
ABCB6	3.86741	3.79794	4.6657	3.95695	5.51372	4.2109	5.55144	4.56375	5.06577	4.34822	4.90734	3.17596	4.27573	4.21488	3.79179	4.04124	3.64711	4.60379	5.0431	4.25377	4.51043	5.58391	3.91752	5.03248	4.13582	5.29335	4.59383	0.377984	3.27467	3.79131	3.33364	3.71928	4.57064	4.37033	4.59875	3.52146	3.32634	4.21964	4.17758	3.09431	5.00826	4.93872	4.63385	4.58489	5.01733	4.09205	5.07996	5.35694	5.08368
ABCB7	6.97411	7.59529	7.49965	7.05804	7.40738	7.64343	7.73173	7.59942	7.63061	7.07491	7.27271	7.55221	7.2982	7.34363	6.63741	7.68291	6.92278	7.50025	7.20746	6.85453	7.49711	7.53743	7.82768	7.23966	7.27729	7.6693	7.8401	7.0915	7.13317	6.94629	7.24853	7.28423	7.26457	7.29283	7.70917	7.588	7.66681	7.61548	7.23754	7.38046	7.44988	7.64702	7.93669	7.65542	7.59596	7.73577	7.46281	7.72896	7.31093
ABCB8	4.07562	4.37163	4.46718	4.2722	3.69816	4.71218	4.42626	4.43882	3.87089	1.95871	4.1542	3.90031	3.99482	4.5607	4.07846	4.07895	3.50124	4.23578	4.55535	4.70017	4.80569	4.47319	3.72282	4.18547	4.5607	4.21879	3.20375	3.83545	4.27747	4.61946	4.48772	3.15061	4.22192	3.20818	3.25683	3.76348	4.28391	4.08319	3.7223	3.77521	3.74706	4.17985	3.9644	4.68342	3.20445	4.58527	4.19334	4.43882	4.51447
ABCB9	3.23333	3.05895	3.56906	2.19537	3.11468	2.07153	1.87908	2.69896	1.39963	3.18199	0.178692	0.0774711	3.56764	1.1385	1.2406	2.49487	1.78911	1.64175	3.40544	0.890831	1.79457	1.29216	1.66559	1.88936	2.07153	1.81967	1.26041	3.71779	1.27027	4.37462	1.32057	5.22746	1.24269	1.294	3.10293	6.58329	2.95826	1.27027	1.28111	1.29076	4.46444	1.27432	5.7627	5.83574	1.29263	5.27225	1.25509	1.24713	1.25211
ABCC1	5.71726	5.45353	6.40385	5.51701	6.02655	5.87693	6.25366	5.67321	5.99966	5.46162	5.86508	5.8402	6.07142	5.86371	5.31062	5.9788	5.71874	5.74542	5.65273	5.75632	6.1274	6.09482	5.91194	5.83304	6.01315	6.28801	5.57413	5.47461	5.64501	5.79892	6.04473	5.5728	5.80511	5.78052	5.6187	5.88413	5.33035	5.7942	5.567	5.59601	5.48875	5.93865	5.76625	5.96829	5.36765	6.11151	5.72412	5.70261	5.89033
ABCC10	5.42554	5.22245	5.81099	5.09671	5.74584	5.57554	5.20346	5.71179	5.50041	5.42324	5.51482	5.17724	5.38362	5.10986	5.70413	5.53864	6.34254	5.53675	5.37281	5.74725	5.35134	5.44256	5.52226	5.26148	5.17266	5.17387	5.56202	5.07214	5.00022	4.38097	5.38036	5.46837	5.30247	5.52477	4.89074	5.45315	5.5417	5.43522	5.12894	5.61726	5.25104	5.65165	5.84827	5.68124	5.51372	4.65129	5.74725	4.51278	4.9835
ABCC11	1.18261	0.31675	3.5728	2.78093	1.48173	3.15176	0.809076	2.46836	2.58996	0.871237	1.03678	1.47272	1.78098	3.10725	1.60562	0.991346	1.47633	1.27644	1.30872	1.78025	2.33407	0.819576	0.940952	0.126878	1.87062	1.29937	1.02228	0.994385	1.02293	1.05179	1.08603	1.0952	3.06851	1.05956	3.66203	1.24164	3.80503	1.85427	3.04482	1.04659	3.55401	1.04895	2.77168	3.45292	2.04039	1.15851	1.71719	0.996803	3.37596
ABCC12	1.21814	0.485583	0.84206	0.472843	1.20105	1.40176	0.733118	0.537873	1.4257	0.225945	0.557574	1.59556	1.28421	1.59073	1.51417	0.754163	0.640264	0.20133	0.526119	0.601932	0.442848	0.008606	0.912096	0.359418	0.165116	1.18717	1.31953	2.55985	1.32924	1.36355	1.38273	1.41303	1.29995	1.36297	1.31306	1.54992	1.3162	1.33378	1.34757	1.35091	1.33266	1.33199	1.38774	1.4732	1.35091	1.45613	1.31466	1.30933	1.30824
ABCC13	0.217343	1.38602	1.32299	2.57944	2.75462	3.20445	2.09974	2.57407	2.90555	1.38703	1.62237	1.5189	1.58691	2.85276	1.26929	1.73675	2.79712	2.42157	1.79576	0.31675	1.86033	1.59733	1.26293	1.52463	1.36936	1.76371	0.824316	0.814882	2.17589	2.47157	2.87813	2.45453	0.824316	0.862393	2.26653	3.56079	2.16049	2.70622	3.33252	1.67661	2.87352	3.07663	3.11138	2.69511	0.849549	0.965667	0.814882	3.0397	1.62237
ABCC2	2.41046	0.670934	1.50765	0.748006	0.582872	0.346098	0.640264	0.969647	1.55439	0.236774	0.434087	0.19437	0.202652	1.12797	0.591581	1.25161	1.22602	0.228175	0.797129	0.202652	-1.13806	0.959293	0.549089	1.00504	1.27792	1.18152	0.973468	0.949917	0.969647	1.00504	1.03797	1.04544	0.959293	1.01461	2.53032	2.66396	0.973468	4.02899	1.00176	0.997394	0.991981	3.64711	1.05179	1.11783	0.999856	1.11496	3.76657	3.44214	2.69315
ABCC3	3.07124	3.69434	2.5143	3.6768	2.85751	3.19517	2.99336	4.5187	2.09249	3.79794	3.21007	1.99987	3.6768	3.61034	3.81885	4.01392	4.02131	4.00418	4.01204	4.19043	3.91659	4.05466	3.97752	4.01526	4.11198	4.06187	0.139764	0.134567	0.135641	0.133683	0.137795	0.136618	0.130235	0.132607	0.130235	0.173755	0.138676	0.140616	0.137795	0.130235	0.133683	0.140616	0.154631	0.15731	0.137795	0.162322	0.128661	0.132607	0.136618
ABCC4	4.11057	4.1334	4.02005	4.05647	3.70691	3.75347	3.55278	3.72125	4.70765	4.17002	3.56764	3.18321	5.07139	4.5865	2.71177	4.23795	4.36661	3.92263	3.46061	4.44112	3.9929	4.38797	5.30516	4.3992	3.82873	4.0112	3.71541	4.05415	4.74018	3.55164	4.43483	4.22692	4.457	2.73021	3.6143	3.8007	4.1046	4.0865	3.87958	4.59096	3.70544	4.39572	4.39742	4.03689	3.80616	4.66689	3.43397	3.66302	3.93876
ABCC5	6.14596	6.05093	6.07538	5.69941	6.22349	6.30605	6.35933	6.10794	6.25552	6.17477	6.38494	6.26856	6.18994	6.2449	6.3301	6.00941	6.36965	6.3597	6.33686	6.41151	6.23047	6.78258	5.82071	6.60457	6.12256	6.58958	6.3229	6.33381	7.24327	6.13291	7.03804	6.54469	6.45418	6.13107	6.24426	6.4382	6.65386	6.03165	6.7001	6.57997	6.75275	5.972	6.08712	5.70488	6.19064	6.35048	6.56826	6.23197	5.86729
ABCC8	1.11601	1.01461	0.553963	1.6772	1.85202	0.533073	2.49981	0.91738	2.78689	1.80126	1.79993	1.97016	1.0254	0.951068	1.41547	2.76164	0.651607	1.70635	0.77701	0.711878	2.53726	0.682639	1.03567	1.6373	1.3162	0.783136	1.83183	1.83019	1.84439	1.88936	1.90206	1.94323	1.79933	1.87313	1.82704	2.23097	1.83518	1.83183	1.8461	1.85202	1.85202	1.82544	1.88003	2.03117	1.84346	2.03221	1.82408	1.82333	1.79993
ABCC9	5.60215	6.24426	6.02254	5.66462	5.99376	5.95989	5.98386	6.19324	5.22245	5.83508	5.79119	5.71143	6.00072	5.86271	5.41153	6.02655	6.51851	6.00578	5.7627	5.8647	5.73282	6.37951	5.96619	5.65817	6.26971	6.32826	6.00515	6.31792	6.23152	6.75241	6.93781	6.30843	6.14415	5.75291	6.5335	5.69508	6.18034	6.08988	6.99771	6.64606	6.37361	5.76791	4.90177	5.6187	6.37212	5.70261	5.72963	5.97657	5.85216
ABCD1	4.61909	5.30479	5.56064	5.34989	5.572	5.33437	4.7445	5.68874	5.13131	4.04904	5.43002	5.67395	5.56837	5.56593	4.6355	5.64501	5.55623	5.13503	5.7226	4.7026	4.83371	4.61867	4.64377	5.11019	5.49926	5.11492	5.10356	5.1536	5.25035	4.96329	5.90639	4.99504	5.60777	5.31975	5.19444	4.92264	4.8377	4.82765	5.56422	5.94128	4.91154	4.86723	5.54395	5.2959	4.94953	5.06133	5.48548	5.6301	5.18606
ABCD2	3.44706	3.67733	4.84096	3.7949	4.97819	4.91982	4.93624	4.59218	4.43702	4.39271	5.10986	4.28713	4.31694	4.57147	3.68139	4.56108	4.68472	4.2863	3.79078	4.41634	5.01661	3.93538	4.98011	4.00568	3.93583	5.10952	3.91993	3.61227	4.14603	4.73688	5.75829	3.46872	4.4889	5.13356	4.72273	4.09299	4.19477	3.81746	4.49172	4.58605	5.15927	3.14001	3.9535	3.95558	3.12269	4.19521	2.9858	4.84414	3.95127
ABCD3	7.57515	8.4073	8.19783	8.35606	8.24949	8.59204	7.70029	7.7029	8.10953	8.44396	8.31032	8.60745	8.17623	8.47502	7.92713	8.6494	8.31399	8.39494	7.97707	8.47698	8.14972	8.75973	8.42986	8.49779	8.7218	8.48337	8.21083	8.45981	8.46487	8.32691	8.39494	8.23723	8.25765	8.28689	8.22939	8.05322	8.53605	8.12397	8.18529	8.60889	7.81906	8.10458	7.52426	7.98891	7.70917	7.80076	8.00547	7.993	7.75414
ABCD4	5.32925	4.97113	4.66884	4.72359	4.99748	4.6808	5.02508	5.03248	4.99226	5.02834	5.2079	5.1282	5.05166	5.05132	5.85414	4.87845	4.9629	5.3581	4.46978	5.09273	5.89234	5.31783	4.40039	5.33389	5.12155	4.60159	5.15772	4.77391	4.506	4.77225	4.24487	4.77955	5.14841	4.35283	5.04427	4.729	5.09828	5.0406	4.70896	4.58239	4.80227	5.69337	5.14253	4.11378	4.74739	4.62111	5.25072	4.91238	4.72058
ABCE1	7.0704	7.23016	6.97778	7.26567	7.12065	7.35393	7.39104	7.42979	6.93865	7.30921	6.97548	6.90128	6.99619	7.19939	6.63822	7.24586	6.97275	7.1221	7.23357	6.92996	6.94045	7.10544	7.6355	6.9552	7.37989	7.29923	7.1935	7.30135	7.35445	7.21317	7.68485	7.37941	7.25013	7.20797	7.13421	7.0915	7.34681	7.2982	7.41241	7.58348	7.0541	6.88517	6.67751	6.98751	7.05019	6.79543	6.95847	6.95437	6.73243
ABCF1	7.70721	7.71116	7.67397	7.65748	7.4708	7.67459	7.56101	7.39617	7.76819	7.70721	7.32014	7.37883	7.41766	7.72285	7.40682	7.49418	7.27674	7.27992	7.7009	7.59218	7.62876	7.47676	7.02518	7.60003	7.54732	7.18537	7.35113	7.44055	7.45171	7.42803	7.30368	7.68079	7.51293	7.58003	7.64411	7.94362	7.1697	6.90128	7.41402	7.6355	7.7973	7.51293	7.57757	7.78754	7.588	7.67178	7.74063	7.90304	7.75549
ABCF2	5.53675	5.85521	5.77264	5.88382	5.14329	5.43484	5.25736	5.48683	5.76683	5.7627	5.45353	5.38538	5.67082	5.85711	5.26188	5.57979	5.44789	6.01761	6.20188	5.928	5.45078	5.48136	5.34914	6.03024	5.81302	5.64164	5.50635	5.58882	5.40892	5.56942	5.33139	5.78898	5.7034	5.5583	5.81768	5.47062	5.42481	5.44677	5.75394	5.48683	5.48986	5.59162	5.58145	5.92861	6.05329	5.86508	5.849	5.65234	5.79759
ABCF3	6.02283	6.17617	6.30883	6.24809	6.33049	6.396	6.14275	6.09871	6.05063	6.22824	5.66986	6.23607	6.32133	6.06034	7.01842	5.45047	4.82416	6.5943	6.34663	5.45078	6.41584	6.50092	6.10085	6.66557	5.849	5.94885	5.45315	5.97101	6.17617	5.542	5.44468	6.00485	5.17598	5.05882	6.36341	6.3206	5.25219	4.98509	5.57694	5.69577	6.54469	6.35442	6.76208	7.05883	6.58329	7.09504	7.23808	6.68855	6.85093
ABCG1	5.56279	5.51337	5.66148	5.41268	4.29398	4.80723	5.05012	4.64445	4.51953	4.44112	5.79998	4.95913	5.37861	5.75102	5.53864	5.15027	5.62186	4.92348	5.15064	4.4195	5.26055	4.64739	4.76209	5.26292	5.24817	5.74028	4.8474	4.51535	5.78694	5.65989	5.37681	5.40854	5.88996	4.85426	4.72773	5.31975	4.58567	4.907	4.42759	5.5903	5.55413	4.94598	4.89441	4.56108	5.03572	5.2091	4.61311	5.47565	5.13972
ABCG2	6.24966	6.40226	5.99032	6.19457	5.48835	6.13107	5.84235	6.19392	6.11151	5.88218	6.24774	5.92052	5.41115	5.5049	5.57838	7.10634	4.78347	5.62971	4.81023	4.99374	4.8559	5.00266	6.37987	6.36965	6.18245	5.77107	5.74232	5.81832	5.46346	6.29985	6.06763	4.68552	5.34087	6.15413	5.8644	6.58677	6.20731	5.43484	6.4389	6.80193	5.10322	6.49045	5.77957	5.79892	5.89065	5.97449	4.93837	5.41228	5.27267
ABCG4	2.07515	4.50545	1.55315	4.86155	3.88681	5.15889	3.51613	5.0919	1.58955	5.18962	1.07934	5.17764	1.21237	4.17573	3.3038	3.79595	3.49911	4.67309	3.46281	4.80772	3.7949	3.88987	3.76957	4.53868	2.44054	4.15222	4.58445	4.81241	2.58901	4.75444	4.05777	4.23891	4.78936	2.48296	3.65111	4.83848	4.85763	0.813793	4.23396	4.89566	3.25747	0.822852	3.94164	0.933759	3.66051	4.44245	4.07562	4.03071	0.791469
ABCG5	0.189716	0.796228	0.217343	0.365239	0.154631	0.625505	0.329169	0.504016	2.95313	0.112935	0.647217	0.928428	1.20734	1.05068	0.349119	1.2856	1.03011	0.817222	-0.157248	1.01203	1.52363	0.0398055	1.14498	0.43619	-0.11836	1.03797	0.860199	0.85031	0.865163	0.877024	0.924566	0.928428	0.860199	0.899145	0.844246	1.08113	3.7605	3.30453	2.57506	0.879187	0.871237	0.893035	0.943029	3.87525	1.87825	0.999856	0.85031	0.832387	0.861606
ABCG8	1.77359	1.87313	1.47471	0.543969	0.798876	2.72179	1.57714	1.75646	2.14672	1.19564	2.09582	1.79107	0.683599	1.76254	1.07504	1.28266	1.45416	0.849549	1.22459	1.11207	1.5823	-0.185746	0.0483543	0.918814	0.998758	0.713763	1.6772	1.67896	1.69496	1.73033	1.74124	1.78301	1.67092	1.72231	1.68435	2.00086	1.68124	1.69076	1.70742	1.7087	1.70382	1.69187	1.73805	1.8461	1.70561	1.84785	1.68376	1.67834	1.73495
ABHD1	5.01978	4.81673	4.94263	4.50254	5.01063	4.29642	5.30805	4.4792	4.49258	5.12894	5.18481	4.65044	5.06206	5.21168	4.46675	4.79923	4.53247	4.87075	4.91945	4.23838	6.11961	5.06093	4.19477	5.027	5.39826	4.59752	4.86197	5.22667	5.38006	4.93837	5.50678	4.86109	4.54255	4.66972	4.82416	6.02689	4.55076	5.20426	4.99625	5.12857	5.43593	3.94896	5.44826	5.40815	4.43702	4.89908	4.48239	5.01941	4.18246
ABHD10	7.46843	8.12798	8.14087	7.64268	8.31032	8.32279	8.11999	8.11928	7.76084	8.16753	8.17411	8.07092	8.06325	8.02052	8.05068	8.04036	7.56399	7.67251	7.83481	7.55164	8.06839	8.00386	8.21162	8.06516	8.31302	7.97943	7.60274	8.35416	8.54437	8.57571	8.62807	8.30372	7.74193	7.74515	8.19344	8.00874	8.33373	7.79537	8.31399	8.15486	7.993	7.87866	8.02739	7.78412	7.89668	7.98251	7.84161	7.97373	7.64702
ABHD11	5.74479	5.9856	5.94128	5.83682	5.96435	5.56559	5.49926	5.8037	5.23725	5.99481	5.77922	5.9496	5.73429	5.50678	5.64307	5.78936	4.66485	5.54468	5.1639	5.70602	6.1591	5.85711	5.35556	6.17916	5.29745	5.69728	5.74085	5.22502	5.6144	5.3595	5.45599	6.17916	5.01552	5.46607	5.37945	3.9644	6.04325	5.77835	5.15772	5.26447	5.87693	5.39391	6.15951	5.97131	5.95844	5.98208	5.96397	5.66807	5.63342
ABHD12	5.07502	6.11257	5.7802	6.52157	5.22893	5.76451	5.2166	6.1474	5.7749	6.39113	5.51221	6.51142	5.8644	6.48414	6.55207	5.5616	5.4194	6.27305	6.50054	6.23088	5.06206	5.07376	5.58465	6.17114	5.37977	5.35556	6.25552	5.87424	5.76236	5.1417	5.65703	5.97922	5.35522	5.45426	6.1262	5.513	5.96092	5.33283	5.36978	5.85379	6.0999	5.5041	6.26441	6.0991	6.6573	6.08204	5.87726	5.928	5.94644
ABHD13	5.58721	4.78858	5.03935	5.28723	5.12427	5.52366	5.04265	4.4889	4.54173	4.92659	5.46497	4.68724	4.77876	4.83607	4.4889	5.10762	4.99261	5.00342	4.7541	5.01978	4.33228	4.9816	5.28215	4.31532	4.77755	5.31818	4.96361	5.22467	4.78088	5.2228	5.65096	4.57643	5.24927	5.16581	4.99901	4.8995	5.06453	5.19193	5.41976	5.26593	4.39956	4.5391	4.52353	4.42036	4.94555	4.85845	4.5698	4.22871	4.63085
ABHD14A	7.1381	7.20036	7.58413	7.08382	7.1504	7.63187	6.93265	7.11223	7.09892	7.54775	7.55221	7.63876	6.69965	7.49711	6.02379	7.13941	7.25815	7.22138	7.60638	7.8153	7.28054	7.26355	6.71946	7.57019	7.41179	7.51893	7.37167	7.10178	6.65429	7.17927	7.07788	7.00263	7.04976	7.32014	7.21264	7.72834	7.3098	7.52366	7.39964	6.72929	7.50854	7.49773	7.90605	7.64003	7.67945	7.75743	7.8923	7.81242	7.25917
ABHD14B	5.40644	5.20988	3.96778	4.63169	5.56315	4.68773	3.83545	5.8267	4.31445	5.81235	5.34364	5.72633	4.49133	5.62186	4.87075	4.70352	4.4272	4.57106	4.16549	4.14147	5.27084	5.18034	4.62364	4.60379	4.19648	4.39614	4.01441	4.65827	5.14918	4.68939	4.86904	4.51278	3.80616	5.32015	4.45007	4.61145	5.50338	4.81884	5.00784	4.4497	4.95073	1.72776	5.52624	4.53247	5.06167	5.00865	5.19984	5.402	5.62909
ABHD15	5.15515	5.23534	4.74949	4.48051	4.54686	4.68004	3.84105	5.37977	4.70017	4.37516	4.01024	5.46497	5.46309	5.29443	5.4777	4.6843	4.53041	4.40567	5.33776	5.594	4.33466	4.131	4.44292	5.5145	4.44112	5.69798	4.37282	4.37734	4.84861	3.70645	4.22649	4.05777	4.9766	4.83293	3.42787	4.85636	4.43324	5.12543	3.74595	2.95901	3.61951	4.85974	3.96823	4.8995	4.83407	4.14234	6.06001	5.89898	5.47958
ABHD16A	5.49845	6.00941	6.08275	6.85014	5.7292	6.34254	5.87166	6.13144	5.73954	6.58799	5.7292	6.62864	6.03925	6.31679	6.00485	5.89861	6.13864	6.02489	6.44133	5.78936	6.82733	6.04108	5.98175	5.48724	6.56826	6.11048	5.99866	6.08542	5.64565	5.83508	5.43041	6.09482	5.79185	5.88413	5.9654	6.09944	5.80652	5.87424	5.25518	5.09034	6.53479	6.79889	6.76564	6.66684	6.82121	6.03745	6.8337	6.90262	6.39519
ABHD16B	1.16231	1.64291	1.46172	1.85949	1.36656	1.51798	1.25672	1.30389	1.47528	1.24214	1.25272	1.23577	1.39649	1.41948	4.12594	4.58742	4.22107	4.98199	4.6258	4.46221	4.57315	4.39092	4.63385	4.42527	4.37776	4.57643	0.139764	0.134567	0.135641	0.133683	0.137795	0.136618	0.130235	0.132607	0.130235	0.173755	0.138676	0.140616	0.137795	0.130235	0.133683	0.140616	0.154631	0.15731	0.137795	0.162322	0.128661	0.132607	0.136618
ABHD2	6.75071	6.73705	6.42163	7.14117	6.14923	6.85758	6.71157	6.35487	6.97328	6.87114	6.4856	6.28471	6.80414	6.85801	6.77135	6.36371	6.55013	6.64606	6.415	7.11431	5.42591	7.03717	7.34029	6.57997	5.97488	7.09892	6.13402	6.39481	6.84339	6.00646	6.86146	6.65688	6.47045	6.41078	6.09028	6.71201	6.20188	5.97101	5.88861	6.85348	6.29095	6.58754	5.69941	6.32511	6.09447	6.15144	6.62701	6.3445	6.5998
ABHD3	5.27017	4.43929	4.38409	5.22667	5.03781	4.17985	4.92897	4.91115	5.15811	4.9422	5.49971	5.63378	4.78131	5.2026	5.80828	5.21206	6.26287	4.60712	5.63632	4.91945	4.33052	5.30006	5.19546	5.39712	4.91561	5.23894	5.20065	4.97586	4.89831	5.43593	5.2861	4.75249	4.81884	5.2738	4.95829	4.33504	4.87914	5.75426	5.07177	5.18303	4.63977	4.59427	4.53949	5.56771	4.87726	4.40264	4.78706	4.86197	4.35327
ABHD4	5.75454	6.44676	6.52643	6.62701	6.17656	6.17842	6.21379	6.2613	6.16444	6.57205	5.93074	6.19779	6.16966	6.72239	5.30703	5.85912	6.09062	5.89234	6.48644	6.00762	5.8511	5.91768	5.94603	6.05823	6.40619	6.83735	4.90854	5.90599	6.25394	6.12775	6.07503	5.9654	5.98999	6.01273	6.28089	5.05574	5.89234	6.49113	6.71248	7.0955	6.02984	5.61546	6.33793	6.3811	6.17303	6.1675	6.608	6.24933	6.51024
ABHD5	5.87759	5.76451	6.2548	6.34697	6.1053	6.05477	6.26856	5.90329	6.11335	5.96655	6.27612	6.06402	6.05264	6.2585	6.05927	6.58558	6.41629	6.33159	6.59797	6.12034	5.67846	6.15144	6.80455	5.84793	6.31318	6.26022	6.37751	6.37287	6.50912	6.33306	6.18598	6.03614	6.28357	6.08095	6.14197	6.00608	6.35854	6.1545	6.23815	6.33983	5.94275	6.44879	6.03504	5.88861	6.04914	6.10489	6.22149	6.00976	5.63378
ABHD6	4.51173	4.09702	4.63977	4.3657	4.87772	4.22831	4.58159	4.46221	5.04095	5.17387	4.63884	3.87473	4.75001	5.12975	4.1305	5.01774	4.67525	5.39712	4.72977	4.56464	5.42481	4.90177	4.43285	4.41459	4.6046	4.57819	4.54775	5.11095	4.07895	5.13538	5.01272	4.65792	4.9391	4.17799	4.74524	4.63036	4.29601	4.36854	4.75608	4.609	4.11907	4.20804	4.98274	5.0158	4.81803	5.14718	5.20599	4.92059	4.5773
ABHD8	3.56816	4.55362	1.14171	3.87423	3.46758	1.41399	1.75383	4.51988	4.67057	0.400286	3.24223	4.71384	1.56015	1.57835	2.36297	2.05893	1.16745	1.94323	3.18689	1.72967	3.34079	1.35856	1.60795	2.22052	1.91199	2.46017	4.35423	3.49205	1.22415	2.40807	4.05222	3.49355	3.65514	4.16825	4.69195	3.80664	4.6094	3.13764	1.24269	4.64739	4.08319	1.36152	1.27692	1.36936	1.24503	1.35743	4.79873	1.20009	4.30657
ABI1	6.54934	6.87114	6.52077	6.79111	6.3095	6.71335	6.44944	6.78472	6.49928	6.47245	6.3701	6.5155	6.16825	6.36929	6.37831	6.57345	6.51928	6.68774	6.24116	6.2439	6.24809	6.6433	6.87336	6.40657	6.45501	6.42447	6.5943	6.70613	6.87055	6.86975	6.66276	6.62546	6.38931	6.46957	6.61986	6.63669	6.41538	6.57579	6.72023	6.61788	6.42447	6.2439	5.66568	6.27898	6.39711	6.5135	6.42046	6.54426	6.49364
ABI2	7.3703	7.29323	7.31803	7.43764	7.21889	7.00356	7.49418	7.06127	7.60961	7.47561	7.35581	7.27835	7.20434	7.11042	7.56576	7.38831	6.34966	6.96347	6.71378	7.18333	7.1003	7.26071	7.27835	7.1844	7.19989	7.11671	7.30602	7.22199	7.67754	7.14801	7.33213	7.43101	7.20536	7.30921	7.33275	7.47127	7.10134	7.0576	7.00589	7.21536	6.90621	7.32723	6.57651	6.57687	6.81398	6.8337	6.88077	6.79404	7.08089
ABI3	4.58041	5.92269	6.03231	6.22898	5.35335	6.37248	5.18519	5.8855	6.52683	5.61546	4.85636	5.73176	5.85281	4.69064	6.30277	5.45494	6.42814	5.83989	5.67556	5.53607	4.63633	4.84861	5.38468	6.15487	6.2301	5.60947	5.47281	5.5583	5.37537	6.50828	6.67314	6.66959	5.91986	6.07658	5.82568	7.22868	6.50281	5.68124	5.9335	6.79153	6.64799	5.69077	6.46882	5.84412	5.80241	6.29574	5.67123	6.00287	5.27017
ABI3BP	7.52929	6.70559	5.58391	6.36154	6.58754	6.74457	5.94168	6.67596	6.53046	7.29534	6.26091	7.43101	7.16088	7.1779	6.69026	6.89086	8.09885	6.38255	5.80241	7.35445	5.80614	6.27349	6.32935	6.00907	6.91154	5.85848	6.12433	6.85178	5.81768	6.54384	6.50246	6.73787	6.36929	5.75179	6.66276	6.16517	6.62784	7.37278	6.38212	7.12866	5.5828	6.3807	6.46283	6.17261	6.18245	7.09991	5.16313	6.56158	6.90214
ABL1	6.52926	7.05369	6.58205	6.91856	6.72102	6.81821	6.79111	7.30082	6.689	7.1886	6.61274	6.86198	6.98538	7.04476	7.46963	6.76688	6.89395	7.0527	6.77573	6.80917	6.71587	6.90305	6.44978	6.38734	6.81821	6.96347	6.25743	6.75119	6.99518	6.97919	7.02951	7.09297	6.68982	7.05173	7.15189	7.50544	6.5628	6.8725	6.92747	6.67396	7.02329	6.86567	7.08657	7.01047	6.76433	7.08657	6.8996	6.92956	7.23357
ABL2	4.16378	4.09656	4.48515	4.86446	4.08319	4.56152	4.50839	5.04391	4.33681	5.05206	4.77016	4.75608	4.41041	4.85547	4.2779	4.58445	5.3021	4.86277	4.84294	4.19334	5.24471	4.86109	5.06979	4.30618	4.75333	4.65792	4.23891	4.95406	4.77391	4.93484	4.8727	5.2083	4.70497	4.96404	5.23725	4.65129	4.86723	4.34647	5.04976	5.17228	4.86484	4.58445	4.39867	4.61987	4.91238	4.92431	4.96561	4.66096	4.86066
ABLIM1	9.52618	9.85726	9.90364	9.52138	9.98434	9.95273	10.0602	9.57794	9.7764	9.84681	9.9672	10.0797	10.1717	10.1539	9.44326	9.97375	9.25559	9.87655	9.64169	9.4476	9.98021	10.0203	9.26404	9.72754	9.68565	9.93631	9.50132	9.64169	10.1361	9.73026	10.0094	9.94617	9.63868	9.52365	10.0246	9.88897	8.90584	9.20384	9.72442	9.51418	10.1076	9.68266	9.55301	9.70933	9.61515	9.81599	9.73519	9.72442	10.0171
ABLIM2	4.40492	5.33355	4.84372	5.31381	4.80609	5.21313	4.45349	5.09228	4.72147	4.99419	4.54992	4.95455	5.44295	4.58742	4.3118	5.62118	4.8345	4.49042	5.18808	4.64377	5.34214	4.63292	4.74117	5.2796	5.71907	4.51447	5.42827	5.27767	5.41406	5.05842	4.99182	5.37206	4.88257	4.7958	5.40892	5.18067	5.13503	5.02315	4.97619	4.92935	5.02058	5.22623	4.81447	4.49799	4.99748	2.57506	5.14559	4.49002	4.93097
ABLIM3	7.35176	7.49191	7.82768	7.62821	7.89364	7.90748	7.72214	7.45888	7.57019	7.90975	8.09885	8.05154	7.49534	7.39054	7.39054	7.25427	7.91523	7.62821	7.07319	7.61744	8.21083	7.82325	7.03612	7.0281	7.82247	7.31469	7.1221	7.25677	7.36417	7.02223	7.49191	7.02416	7.72896	7.71584	7.2896	7.64832	7.51233	7.60961	7.88915	7.80339	7.25677	7.41402	7.30656	7.27115	7.99064	7.46558	7.71246	7.50085	8.09968
ABO	1.15528	1.60261	3.71626	3.52866	2.28787	4.92181	2.85458	4.1019	3.41163	4.15303	3.36977	5.04902	2.69599	4.6748	3.5582	4.1542	4.07005	3.66302	3.99617	4.09518	3.88492	4.08178	2.24248	4.68043	2.50465	3.80964	4.00719	4.28834	2.36534	3.81885	4.21785	3.17835	3.60814	4.33466	1.62477	3.4755	3.65369	3.41047	3.98785	4.34877	4.44586	3.65321	3.48591	4.12273	3.61703	3.42301	3.38219	3.97378	3.44046
ABR	6.98261	6.89791	6.45418	6.63633	6.52077	6.70231	6.78791	6.70988	6.66959	6.83456	7.03289	7.13472	6.88037	6.86975	6.45772	6.73494	6.26596	7.0704	6.63192	6.76433	6.30633	6.50474	6.1769	6.83866	6.83322	6.36728	6.66276	6.48956	6.32973	6.38844	6.38494	6.55359	6.91894	6.86934	6.92444	6.69413	6.48011	6.09663	6.47697	6.33306	6.73747	6.97501	6.81323	6.76208	6.5603	6.91563	6.90621	6.84461	6.91154
ABRA	5.91002	7.08614	5.3869	6.39328	6.15721	6.88657	6.96024	7.20485	6.84254	6.30246	6.14669	6.31556	6.14777	6.27647	8.03153	6.97686	5.11676	9.07833	7.48312	7.11174	5.87693	8.2362	8.19441	7.07226	6.56424	7.18489	7.98096	7.04561	7.93391	7.10407	7.01329	6.06436	6.00907	8.19143	7.95028	8.19441	7.66869	9.58078	6.59675	7.22199	7.29283	8.96587	6.88118	7.48876	6.22608	7.19266	6.77535	6.25366	7.87799
ABT1	5.68305	5.58688	5.41374	5.17637	5.74798	5.35335	5.49804	5.10872	5.75291	5.44066	5.61367	3.02934	5.9195	5.84548	4.87154	5.49127	5.14125	5.31309	4.95036	5.21465	6.21264	5.04391	6.04402	6.22192	5.49635	5.42264	6.01082	5.75523	5.3074	5.74725	5.37281	4.97586	5.33602	5.62808	5.63489	5.00181	6.05637	6.02314	5.69473	4.87845	5.68766	5.9023	6.03395	6.04951	6.30215	6.07351	6.10205	6.06851	5.91079
ABTB1	4.64904	3.67577	5.28454	4.05048	4.44879	4.57233	4.70765	3.97999	4.69153	4.17665	4.25964	3.89751	5.22132	3.99189	5.84158	4.36362	4.43882	4.11378	4.75733	4.82124	4.72016	4.87028	4.0107	4.31843	4.80569	4.3219	4.25295	3.76348	4.31843	4.20004	3.90471	4.43094	2.81838	3.69301	4.85845	4.4272	3.71194	4.38797	4.49084	4.46182	3.76905	4.37909	5.01885	4.55401	4.89609	3.58572	5.09981	4.59712	5.09355
ABTB2	4.80185	6.21183	5.41228	5.97101	6.35203	6.13037	5.07956	6.14161	5.56986	6.60274	6.08883	5.61546	5.82171	5.74198	5.19616	6.33752	5.14559	5.65703	5.3964	6.20835	4.90494	5.23016	5.62808	5.79791	6.70904	4.76288	5.16429	5.8267	6.24426	5.45461	5.61253	5.92831	5.6984	4.90212	5.51767	4.59427	5.66638	4.65253	5.37318	5.61077	5.35335	5.26673	5.08368	5.52624	5.68017	4.80424	6.07066	5.80578	6.88863
ACAA1	7.7172	7.97623	8.5277	8.18686	8.4396	8.47801	8.35307	8.00631	8.08518	7.82768	8.39494	8.49779	8.57463	8.72297	7.79864	7.97051	7.43818	8.33577	8.29041	8.27172	8.42651	8.31999	8.18167	8.34927	8.52412	7.70597	7.96583	8.28861	8.13839	8.01196	7.43039	8.29974	7.993	8.21351	8.34676	8.13322	8.37241	8.06093	7.57387	7.45112	8.18602	8.37449	8.35606	8.65826	8.19242	8.49024	8.4211	8.4073	8.36402
ACAA2	7.68485	7.38046	8.66348	7.93963	8.363	7.96814	8.15234	7.70659	8.15311	7.46558	8.23315	7.70029	8.29041	8.10883	7.27163	7.84723	8.22654	8.86143	8.36199	8.00003	8.3483	8.15674	8.63392	8.32992	8.14174	8.7218	8.41687	8.19029	8.02739	8.72297	8.20105	8.03375	8.22023	8.42012	8.5	7.59469	8.36402	8.28593	8.53502	7.993	8.43566	8.12798	8.34927	8.46817	8.47284	8.44835	8.62053	8.31302	8.17326
ACACA	3.3473	3.66393	4.5619	3.52146	3.40161	-0.0365815	3.97949	3.91794	3.86281	3.6563	4.47676	3.54027	4.69485	3.02208	5.30771	4.58827	4.33815	3.4789	3.75403	2.65444	1.14826	3.49963	3.72335	3.53979	3.11875	3.85226	4.29041	4.03024	5.21096	1.83832	1.85509	4.58041	1.76254	3.96345	1.78776	5.42324	3.96865	5.20346	1.807	1.8099	1.807	5.06249	1.83605	4.5702	1.80778	6.05442	1.78519	1.78301	4.44067
ACACB	7.19939	6.6581	7.30827	6.36227	7.24899	7.18907	7.16185	6.45255	7.0617	6.67715	7.3354	6.70819	7.04923	7.22551	7.56399	6.6573	6.63033	6.77616	6.78388	6.75746	7.51042	7.72421	5.86729	7.06618	7.01579	7.61301	6.5998	6.97919	6.63379	6.83456	6.56508	6.87561	7.09011	6.82655	6.92229	7.01196	6.29128	6.48255	6.71587	6.22529	7.55518	7.12355	6.66276	6.72536	6.98015	6.50435	7.07179	6.95929	6.80622
ACAD10	2.1905	3.05965	2.86747	2.08608	2.73894	3.78687	2.35867	2.61773	1.67615	2.89555	3.02642	2.81337	3.1394	3.3747	-0.0632726	3.68777	1.72158	2.7639	1.58792	2.56998	2.47443	3.57004	3.05296	3.42468	2.24377	2.55219	2.22197	2.2008	2.22456	2.26519	2.27586	2.28522	2.17478	2.22971	2.19673	2.47029	2.227	2.21415	2.2008	2.22197	2.227	2.1905	2.2413	2.34819	2.21689	2.34449	4.38183	2.18813	2.15082
ACAD8	7.24076	7.88616	7.67044	7.79661	7.7776	8.04448	7.92626	7.99782	7.38647	7.69723	7.50544	7.64343	7.4958	7.8375	7.66276	7.72896	6.52157	7.45888	6.88419	6.98064	7.90679	7.56893	7.71116	7.81023	7.79189	7.50914	7.61019	7.66138	7.58667	7.55977	7.21889	8.05413	7.36741	7.48816	7.85357	6.68172	7.70858	7.08287	7.55792	7.42408	7.97623	7.31867	7.1594	7.06564	7.84095	7.68609	7.96897	7.79864	8.0166
ACAD9	6.67314	6.86146	6.51701	6.76343	7.06307	7.24265	6.64214	7.0162	6.62016	7.00589	7.21635	7.30255	6.46055	7.01924	6.46622	6.81779	6.28013	6.85269	6.71624	6.5603	7.49191	6.94221	6.69798	6.50435	7.10504	7.62254	6.78438	6.67271	7.13941	6.80587	6.62742	6.78616	6.90807	6.68554	6.67002	7.31803	6.22385	6.49222	6.55778	6.42814	7.09405	6.69759	7.47974	6.8037	7.01196	6.90007	6.91601	6.99771	6.39642
ACADL	4.30017	4.08319	4.29778	4.92555	2.89078	2.58551	3.43104	3.8633	4.765	4.93484	3.5338	4.49799	3.39242	3.89469	4.33999	4.39485	3.98923	3.3373	3.90031	4.2425	3.94943	5.19857	3.63472	4.1101	4.00038	3.9535	2.97781	3.11012	4.27573	3.77622	3.35571	3.56122	3.47085	3.50241	4.25016	3.73836	4.45049	3.30073	4.84613	3.87129	4.02992	4.77683	3.22111	3.9814	3.05965	3.85848	3.00259	4.41132	3.23038
ACADM	9.95273	10.4239	10.3878	10.7599	10.6171	10.8824	10.3412	10.585	10.4496	10.7886	10.4828	10.6821	10.0533	10.7301	10.0568	10.4544	10.0922	10.585	9.94617	10.3477	10.6043	10.3065	11.0737	10.0874	10.3878	10.2031	10.6677	10.525	10.6601	10.5371	10.4883	10.6102	10.331	10.6977	10.3574	10.653	10.5793	10.2824	10.6677	10.4772	9.93973	10.3159	9.96296	10.2342	9.94617	10.439	10.4126	10.2622	10.1237
ACADS	5.9424	6.74042	6.40735	7.04701	7.11916	6.97411	7.11861	7.15521	6.91109	6.8223	6.84919	7.06457	6.72969	7.47856	6.25149	7.31643	6.29468	7.1906	7.66138	6.66636	7.11671	6.64571	6.86606	6.66027	7.38106	7.23306	6.87473	7.15788	6.72102	7.10178	6.96729	6.87163	6.66636	6.97371	7.02951	6.7771	7.15741	6.85453	6.51142	5.87488	7.24423	7.32179	7.47856	7.43706	7.25969	7.58914	7.51711	7.82907	7.07656
ACADSB	7.63305	7.89072	8.38026	8.00874	8.30372	8.06186	8.02141	7.39737	8.443	8.36868	8.62807	8.51126	7.74063	7.86231	7.64702	8.15311	7.1089	8.03375	7.55572	7.81023	7.88769	8.38756	8.14629	7.96434	8.37241	8.2172	7.85791	8.41345	8.87494	8.39593	8.42651	8.14533	8.18686	8.06093	8.09543	8.12397	8.10382	7.59278	8.03879	7.99864	7.83621	7.75615	7.51841	7.56337	7.8068	7.87273	7.50671	7.588	7.92713
ACADVL	9.79155	10.0922	10.189	9.75011	10.5312	10.4126	10.181	9.99778	9.50132	9.60425	9.85726	9.20775	9.83441	10.1489	9.92963	9.67134	9.69068	10.0874	9.9672	10.1116	10.5605	10.3621	9.92295	10.1984	9.91972	9.96296	9.87338	9.99778	9.9672	10.3412	9.88286	10.3159	10.1076	9.87338	10.3621	9.77068	9.82812	9.65586	10.189	9.86141	10.4602	9.81599	9.86141	10.2776	10.4035	10.2342	10.585	10.4079	10.3722
ACAN	3.74706	5.08217	4.17179	4.11948	4.36052	4.5865	4.18113	4.14702	4.75809	4.77016	4.40438	4.9322	4.38453	5.27666	3.70851	4.07941	4.0983	5.13576	4.46582	4.75733	4.33428	4.13671	4.81673	4.77134	4.94263	4.29642	3.52544	4.80302	4.78131	4.5628	3.54751	4.25605	4.23891	3.74595	4.30576	5.41337	3.77296	3.87223	4.19691	3.69096	4.20044	4.43285	4.97929	4.58239	4.18636	4.9492	4.50421	4.51828	4.31356
ACAP2	6.18074	5.73777	5.5569	6.2439	5.99443	5.58432	6.14957	6.15303	6.23815	5.89033	5.69613	5.84757	5.77405	5.63412	5.59162	5.88344	6.21264	5.77653	5.29745	5.59162	5.50002	6.08024	6.1045	5.86371	5.47461	6.18529	5.83539	5.86335	5.84377	6.01459	5.83539	5.6264	5.99376	6.00869	5.62383	5.972	5.70192	5.95803	5.95445	6.07913	5.39062	5.55965	5.52435	5.97384	5.67395	5.88695	4.74949	5.6044	5.6639
ACAP3	4.74647	4.84096	4.81718	5.14253	4.7026	6.22111	4.01306	5.85414	4.81085	4.36743	4.52691	3.33852	4.49799	6.06805	5.85848	5.15144	3.52745	4.08965	4.92621	5.46095	4.75687	5.13503	3.54848	4.83926	5.00266	4.72359	4.97357	4.95196	4.06046	4.9097	0.925199	4.95743	3.79179	3.90282	4.39782	4.6551	5.14488	4.54335	2.27847	0.880586	5.07757	5.01506	5.44029	5.39905	4.89074	4.94683	5.69541	5.63206	6.19425
ACAT1	9.32808	9.64393	9.67392	9.05756	9.91504	9.7764	10.0835	9.88286	9.46779	9.34354	9.86704	9.49085	9.55518	9.5111	9.26404	9.66903	8.89024	9.64169	9.41001	9.31494	9.77867	9.66139	10.0057	9.56598	9.79457	9.82179	9.41001	9.59102	9.39241	9.80026	9.79155	9.71829	9.45265	9.59102	9.7764	9.7764	9.6525	9.6467	9.88579	9.88579	9.82179	9.61515	9.77068	9.52618	9.83728	9.80948	9.45995	9.55301	9.39988
ACAT2	5.66986	5.6941	5.64406	5.81338	5.81482	5.75062	5.84158	5.35913	5.82708	5.78724	5.70712	5.66353	5.5777	5.57803	5.42198	5.70225	5.62083	5.77034	5.89065	5.30832	5.07996	5.46009	5.8848	5.68158	4.69272	5.71214	5.45858	5.30516	5.69941	5.72963	5.48179	5.64679	5.63562	5.80652	5.83574	5.57166	5.63632	6.33493	5.55069	5.43184	5.70928	5.24891	6.79593	6.28281	6.12815	5.92167	5.31669	5.75356	5.88796
ACBD3	8.01739	7.70858	7.66869	7.58609	7.53859	7.36624	7.64068	7.66604	7.72631	7.4984	7.46675	7.64632	7.74386	7.30368	7.52246	7.49965	7.32605	7.49711	7.29706	8.03614	7.34469	7.21635	7.67044	7.51168	7.59804	7.61191	7.78892	7.68079	7.75891	7.50363	7.59218	7.64343	7.63061	7.43436	7.64003	7.32664	7.77903	7.50544	7.96497	7.85711	7.34363	7.55977	7.4931	7.24327	7.38314	7.35908	7.2577	7.29975	7.67535
ACBD4	5.08762	4.07846	5.71947	5.15811	4.83571	1.1261	3.55164	5.3321	5.59094	4.19135	5.37422	5.32846	4.6368	4.52991	4.93948	4.54465	5.08403	4.3391	4.71461	4.05048	5.703	3.87574	3.56958	4.74417	4.54077	4.96438	4.80185	5.53498	4.17224	5.59718	3.3731	4.85189	4.4272	5.45599	5.52953	5.3822	4.39528	5.34439	4.83293	4.68985	5.99481	5.74725	0.676375	5.8228	2.92691	5.85216	5.61517	4.79751	5.14559
ACBD5	8.29891	8.09885	8.33577	7.68428	8.45297	8.01277	8.37726	7.91523	8.50556	7.68166	8.51223	8.34579	8.31109	8.45981	7.6355	8.24279	7.57387	8.11693	7.57066	7.24423	8.35416	7.74326	8.72039	8.20638	8.52019	8.37534	8.24464	8.09	8.21516	8.16519	8.23122	8.26593	8.13913	8.59341	8.18948	8.55568	7.73844	8.13077	8.54894	7.95356	7.821	7.90235	7.98967	8.15391	7.38213	8.18269	7.66276	8.03375	7.54554
ACBD6	6.2297	6.28205	6.08542	6.53561	6.23684	6.47697	6.43984	6.27576	6.20111	6.29761	6.29985	6.45577	6.14669	6.28733	6.64571	6.19885	5.88447	6.1175	5.94679	5.90477	6.25189	6.37444	5.87203	6.14889	5.54437	6.55013	6.78051	5.86124	5.75214	5.84273	5.68836	6.15038	5.92755	6.10869	6.16065	5.72485	6.22308	6.18672	5.96795	5.87132	6.09331	6.69636	6.37171	6.22708	6.45372	6.10085	6.24042	6.54967	6.23769
ACCS	5.85816	5.98813	1.46063	4.79401	5.51337	5.34512	5.24177	2.70296	2.88291	3.17257	4.53993	4.18916	3.25452	4.2779	5.03322	4.14982	4.05647	3.92634	3.92779	3.64768	4.26866	3.40945	4.2849	4.74697	3.68502	4.15556	2.49487	1.57386	4.46444	5.11676	1.93875	0.325833	4.58489	4.55725	0.29846	3.32398	4.22606	2.68825	2.33407	3.2839	4.58363	4.50386	0.403173	5.25181	4.06394	3.05829	5.18884	4.37814	4.70402
ACD	4.72411	4.58527	3.93297	4.59137	2.83616	4.68592	3.55886	3.87717	4.39867	2.18112	4.81635	3.87525	3.21997	1.57205	3.37888	4.07433	4.36614	4.68852	4.42841	3.28263	2.83031	4.307	3.29355	3.13083	2.87272	4.09102	5.50718	1.41254	1.43877	1.47168	1.49449	1.52146	5.1585	1.46443	5.05354	1.66677	1.4257	5.54805	5.48441	5.29371	1.44237	6.13037	1.48952	1.57835	1.451	1.56971	1.42954	1.4172	6.28501
ACE	4.9418	5.3321	5.36405	3.8514	4.43847	3.40483	4.39362	4.45221	4.2097	4.32685	4.3756	4.77348	2.61464	3.28263	3.7435	4.22234	3.79333	4.17079	3.36977	4.02051	4.68342	4.22423	5.00266	3.43561	5.68937	4.44292	4.3469	4.81357	4.12463	3.8007	3.5744	0.797129	4.51278	4.91154	4.01164	0.953297	4.0285	4.52736	0.773523	3.8445	4.45265	4.96522	4.74239	4.65674	4.35327	2.65984	4.35854	4.21313	4.57359
ACE2	8.10208	8.42422	7.52795	9.22901	6.30347	6.39787	6.18598	6.9764	7.82907	7.69386	6.58329	6.96114	7.91128	6.91017	8.98474	7.853	6.71985	7.05722	6.58677	6.60719	6.53046	6.03359	6.89258	7.05978	7.91998	6.05709	7.36313	6.68041	7.14158	5.96655	6.53123	7.27674	6.92801	7.24632	7.16335	7.68079	7.95639	6.79506	6.77931	6.99234	6.62472	8.18356	7.17413	7.41072	6.83413	7.20636	6.2177	6.23119	6.93557
ACER1	0.627871	1.38774	1.17513	1.28209	1.14232	1.34929	1.40497	1.14293	1.19459	0.248132	1.33533	1.29116	0.374773	1.56197	0.222758	-0.847811	0.570405	1.00885	0.782313	1.00504	1.42314	0.802509	0.184664	1.05956	1.02115	0.822852	1.22811	1.20328	1.23264	1.26461	1.28614	1.31247	1.20787	1.2577	1.21541	1.44426	1.22079	1.23577	1.24993	1.25616	1.24269	1.2406	1.28502	1.37848	1.25564	1.36413	1.21593	1.20854	1.21237
ACER2	4.75207	4.42036	4.89908	4.8531	4.34498	3.4547	4.86863	4.98613	4.10879	4.0112	4.39572	3.22747	4.96522	4.85426	3.29047	4.34498	4.48334	5.15479	4.59571	4.92431	4.22014	4.96781	3.66745	5.50979	4.30962	4.79021	4.53247	4.32064	4.57951	5.04941	3.94258	3.53711	4.42759	4.45313	4.64377	4.85845	4.31611	4.46492	3.99094	4.94099	4.60333	5.11197	2.25841	2.79631	2.76899	4.64575	4.44462	3.55644	4.39133
ACER3	5.26553	4.70402	5.36255	5.17992	5.27188	5.13538	5.30771	4.71546	5.27267	4.87476	5.22815	4.85933	4.81673	4.9986	4.93792	5.61944	5.09313	4.91807	5.20674	5.03621	4.92468	5.37496	6.29542	5.28025	5.44677	5.80439	4.92181	5.43373	5.61289	5.4763	5.4415	4.92621	5.59501	4.99374	5.311	4.9629	5.39606	5.34728	5.55342	5.96397	5.10911	5.30247	5.10439	5.2095	4.9707	5.20755	5.07252	4.99748	5.27084
ACHE	1.32057	1.81285	1.4012	1.39649	0.502196	1.39038	1.39395	1.96638	1.60562	1.25367	1.26929	1.47216	0.240035	2.45039	0.966458	0.485583	1.2774	0.731307	1.08172	1.29623	1.84868	0.231852	0.683599	0.174475	1.13411	1.15796	1.68189	1.68492	1.70025	1.73675	1.74619	1.78849	2.44907	1.72903	1.68898	2.00865	1.68734	1.69496	1.7118	2.34212	4.34729	1.69621	1.7419	1.85362	1.71117	1.85362	1.6879	1.68548	1.66744
ACIN1	5.59306	6.06851	6.19254	6.17963	6.09331	6.33269	5.90366	6.3031	5.41745	5.8644	5.48211	6.19704	5.68627	6.09871	7.08474	5.40747	5.94416	6.05671	5.80614	5.64747	6.01043	6.03893	5.41153	6.43563	5.11235	5.67082	6.34762	5.08594	5.72412	6.35363	5.03364	6.28769	5.95407	5.80792	5.91412	5.36941	5.85414	6.2449	5.8752	6.11899	6.63379	5.95372	5.2166	5.83273	6.99102	6.4684	6.5099	6.43854	6.29542
ACLY	6.64606	6.40265	6.4213	6.31283	6.2122	6.26856	6.34254	6.5991	6.09298	6.46404	6.33905	6.04613	6.52855	6.43634	7.38372	6.23235	6.60149	6.0784	6.4248	6.4684	6.20665	6.38891	6.62052	6.37083	6.35326	7.05804	6.4389	6.44364	6.66238	6.608	6.79841	6.49401	6.69494	6.28471	6.26891	6.44546	6.59946	6.62909	6.80146	6.76124	6.60676	6.26287	6.06618	6.34254	6.23381	6.21087	6.31556	6.44479	6.71662
ACMSD	3.2491	1.09347	3.5582	1.36413	3.86569	-0.0598817	1.35802	-0.00238888	1.80634	3.19325	3.59395	1.97821	2.95973	1.18461	1.46172	2.79536	2.68723	3.18625	0.738583	2.32418	1.44074	3.04336	1.65416	0.979523	1.42462	1.08172	2.12829	3.84932	3.55213	2.7519	3.29047	3.3987	1.28925	1.98705	2.80833	2.60975	3.71541	3.07448	2.87429	0.598204	0.585918	3.28327	0.665298	0.710002	3.69908	0.720993	3.49261	0.545783	2.93711
ACO1	7.2512	7.21945	7.63305	6.81231	7.58202	7.37098	7.81906	7.25175	7.25475	7.30656	7.43317	7.46227	7.57144	7.3703	6.98585	7.06262	7.10224	7.34793	7.30135	6.9999	7.59021	7.14848	7.15631	7.42293	7.67535	7.28147	7.49914	7.49365	7.70659	7.66206	7.72631	7.58857	7.32393	7.56576	7.4251	7.65542	7.34735	7.08187	7.35011	7.24076	7.1381	7.32123	7.17891	7.48381	7.18389	7.16587	7.54109	7.38597	7.29594
ACO2	9.17956	9.82812	9.6525	9.53407	9.75907	10.1198	9.76811	9.73272	9.35465	9.83111	9.47525	9.74407	9.5734	9.77292	9.61756	9.64975	8.60889	9.69352	9.75011	9.34354	9.83441	9.74082	8.96928	9.97375	9.77292	9.57591	9.28972	9.64975	9.66381	9.57074	9.19528	9.65854	9.55518	9.74407	9.83728	9.46265	9.27529	8.955	9.19528	8.91894	9.92963	9.84061	9.77292	9.85726	9.84369	9.88897	10.0639	9.87338	10.1764
ACOT1	7.1823	7.90171	8.17892	7.98801	8.53605	8.28013	8.08607	7.92394	7.64702	7.84926	8.23723	8.37164	7.88769	7.98568	8.24374	7.80614	8.21934	7.96434	7.77404	8.68157	8.93956	7.51953	7.72421	8.52546	7.24632	7.8388	8.06516	8.58502	8.37064	8.60512	7.74515	8.90739	7.73034	7.8313	8.70601	7.7172	7.63493	8.19441	8.20809	7.71318	8.2895	8.00966	8.10794	8.05508	8.27172	8.18948	8.62189	8.43445	9.06762
ACOT11	5.12006	5.4297	5.32198	5.80958	5.15556	5.73882	5.33633	5.59858	4.90067	5.49671	5.1305	4.2331	5.36909	5.42154	5.94379	5.32015	3.706	5.50371	4.90854	5.16084	5.1228	5.17724	4.76332	5.97955	5.68091	5.21421	5.70121	5.29889	5.10214	4.62792	4.10837	4.81958	4.9418	4.52602	5.65412	4.74647	4.41086	4.03558	4.72496	4.00515	5.23894	5.1654	4.02131	5.29148	5.53104	5.58721	4.85885	5.1841	4.43525
ACOT12	2.49873	2.6687	1.83518	3.67785	3.51881	4.65948	3.42199	0.558937	3.21711	4.41993	1.11207	2.33023	2.69213	3.7675	3.1394	2.27421	2.39991	2.14816	2.68825	2.79051	3.07663	3.44101	2.69511	3.10347	3.522	3.68404	3.00986	2.43221	2.93865	4.03071	3.56597	4.25558	0.922622	2.36013	2.89078	3.42571	3.92034	1.97821	3.88681	2.58349	2.17478	2.58768	0.335372	3.00917	2.26254	4.04593	0.547405	2.96395	3.10293
ACOT13	7.86433	7.93232	9.09863	8.30162	8.87028	8.65351	8.4211	8.18686	8.78362	8.44223	8.75173	8.6062	8.88868	8.90287	8.84678	8.43752	8.36009	8.80535	8.77356	8.5	9.24878	8.91563	8.70856	8.9331	8.66851	8.66724	8.52546	8.46088	8.27612	8.56173	8.04448	8.09366	8.61279	8.74193	8.19441	8.49024	8.67789	9.07489	8.36968	8.2971	8.52412	8.77785	9.32142	9.15271	9.00121	9.12396	8.79966	9.04083	8.32184
ACOT4	4.69681	4.96937	4.12634	5.09949	5.01885	4.72016	5.02058	5.05727	5.30945	4.89723	5.30805	5.08255	4.43094	4.0883	4.47413	4.63169	4.18032	3.98052	5.30805	4.57682	5.44677	3.86683	4.88218	4.71639	4.69562	5.00941	4.96172	4.99709	4.68384	3.25396	5.288	4.44879	4.2122	4.55982	4.6123	4.3814	3.73539	4.60042	4.58239	5.26905	4.42967	3.63855	5.11455	4.81164	4.86066	5.12464	5.64437	5.35621	5.18646
ACOT6	0.877024	1.42314	0.775374	1.25564	1.22415	0.462524	0.122628	0.653486	0.170394	0.635229	0.624278	0.861606	1.83962	0.626502	0.155715	1.3162	0.897003	1.22757	-0.218295	0.0545436	0.865163	0.6972	0.969028	1.17672	0.44475	0.866465	1.0678	1.04717	1.07148	1.10791	1.13253	1.15365	4.11948	1.11207	1.06239	2.95973	1.07375	1.08903	4.05277	1.09717	1.09115	1.09406	1.14354	1.21126	1.10272	1.20977	1.06239	1.05296	1.06664
ACOT7	4.87845	5.47565	5.03977	5.65664	4.8527	5.80203	5.21206	5.39751	4.97744	5.77367	4.5628	4.80646	5.1904	5.54317	5.87392	4.96221	4.81478	5.4926	5.55588	5.96249	5.48342	5.17637	4.76817	5.52991	5.1585	5.00266	4.61354	4.57908	5.13755	5.17845	4.9731	5.01425	5.22467	5.11604	5.03322	5.00145	5.1127	5.0162	4.97929	4.58693	5.49635	4.7826	5.06293	5.2158	5.21535	5.25253	5.19193	5.01733	5.37612
ACOT8	5.58805	6.11961	6.73949	5.79287	6.14051	6.44133	6.04655	5.89481	6.16675	6.50435	6.12775	6.08467	5.83872	6.17002	5.99966	6.27463	6.01646	6.6359	6.3445	5.65447	6.46013	5.1379	6.16326	6.20589	6.19106	6.0999	6.53008	6.17514	6.25223	6.04613	5.85944	6.32553	5.77034	6.17584	6.27576	6.13633	6.34176	6.65139	5.51188	5.3503	6.5632	6.2331	7.10823	6.33116	6.15576	6.79972	6.34624	6.34176	5.73954
ACOT9	8.49227	8.70601	8.00066	8.50087	8.37726	8.45878	8.20638	8.03153	8.08454	8.35606	8.12159	8.36009	7.87935	8.57571	8.47502	8.94644	7.59082	8.15583	8.47159	8.09366	8.19441	7.97131	8.68702	8.41565	8.45667	8.2971	8.2971	8.2971	8.50198	8.10953	7.93466	8.65826	7.83621	7.86231	8.35812	8.36681	8.4801	8.0136	7.85077	8.33088	8.31187	8.6494	8.30557	8.57463	8.03614	8.07997	8.19863	8.26593	8.31595
ACOX1	6.65179	6.18853	6.15951	6.3109	6.64365	6.43126	7.27414	6.18807	6.54061	5.99966	6.66238	6.56552	6.89045	6.3701	5.9856	6.33231	5.95885	6.84254	6.16141	6.1755	6.34213	6.21842	6.47697	6.17584	6.74916	6.31318	6.4267	6.5244	6.81988	6.62052	6.27267	6.12395	6.18529	6.38457	6.41712	6.73161	6.4382	6.06001	6.10165	5.47565	6.4382	6.668	5.79322	6.34663	6.03093	6.39787	6.78966	6.39407	5.90366
ACOX2	7.03151	7.27476	7.7973	7.20746	7.66533	7.5368	7.23507	7.08519	7.23607	7.55164	7.2891	7.39054	7.27674	7.02614	7.41029	7.43436	6.36646	7.57201	7.51105	6.9129	7.45695	7.41402	7.18811	6.74669	7.59021	7.21057	7.3843	6.84125	6.73863	7.13317	6.91736	7.03289	6.69671	7.25969	6.92956	6.86888	6.74669	7.16868	6.70267	6.50675	7.22298	7.88075	7.52929	7.59654	7.32775	7.39849	7.92469	7.18715	7.20036
ACOX3	5.63177	6.02621	5.62844	6.00646	5.6235	5.89861	5.86508	5.99583	4.80569	5.16808	5.70784	6.30246	5.72562	6.23088	6.38734	5.54844	5.12615	5.26485	5.32742	5.91039	5.99866	6.56204	5.72633	6.03861	5.67288	5.64307	5.95915	5.73642	5.48101	6.05671	5.45013	6.11714	5.32778	5.5332	5.92468	5.92927	5.87092	5.62383	5.75632	5.33524	5.81099	5.6018	5.30907	6.00146	5.86205	6.00721	5.76718	5.88003	5.51091
ACOXL	1.62296	1.27692	2.78768	4.26268	2.85358	1.93674	2.39566	3.7173	3.18491	4.13805	3.77622	4.09102	1.52658	1.72602	1.88787	3.06631	1.99033	3.36615	3.0553	2.11219	2.20333	1.95569	1.67953	2.45905	2.39332	3.01296	3.04412	3.12449	2.49487	3.40544	3.09489	2.50581	3.31018	0.458605	3.90996	2.50465	3.82038	3.42513	3.61999	3.09615	3.3085	3.5269	2.85531	3.41676	3.49052	3.31083	2.65539	1.06606	3.16074
ACP1	7.54046	7.44825	7.92543	7.97943	7.62685	7.34901	7.69063	7.59469	7.93027	7.85505	7.87346	7.83275	7.63364	7.59156	7.99134	7.52302	7.35393	7.48981	7.56399	7.87507	8.18686	7.74121	7.75891	7.67945	7.92713	7.72421	7.77342	7.6979	7.68875	7.80401	7.31314	7.80755	7.97943	7.58857	7.70533	7.81753	7.90235	7.94523	7.83405	7.36577	7.70029	7.90098	7.85077	7.76884	8.09717	7.88616	8.02739	8.14087	7.7364
ACP2	5.64534	6.06805	6.67914	6.49187	6.17514	6.92701	6.38658	6.91856	6.7275	5.91377	5.80309	6.37083	6.11151	5.892	6.44723	6.1591	7.5461	6.75403	6.27713	6.831	6.57651	6.30347	6.15144	6.43783	6.19885	6.20731	6.46586	6.07423	5.55931	6.20366	6.00382	6.49222	5.90202	6.24966	6.15038	5.6841	6.38544	6.07913	6.44723	6.54545	6.86239	6.24247	6.62133	6.91695	6.67122	6.71704	6.842	7.03946	6.91563
ACP5	0.93095	3.46009	2.85895	3.77429	2.96615	0.742936	2.95226	4.45735	3.56906	4.56672	1.39798	4.49386	0.162322	4.44506	3.37596	3.38725	5.69443	5.04223	3.71541	3.41222	3.97653	1.60081	3.14501	1.80332	2.92392	3.83545	0.720993	3.9531	3.62605	4.69234	0.763334	3.17532	0.710002	2.41636	0.68572	3.815	3.81294	4.76683	0.748006	3.62104	4.42171	0.747032	5.04663	2.42026	4.25694	0.869368	2.62881	4.36743	4.36007
ACP6	5.86508	5.87424	6.44095	5.58078	6.09482	5.37644	6.3445	6.04438	6.65942	6.70775	6.46882	6.03538	5.8089	5.41228	5.31818	5.70784	5.27497	5.98669	5.37861	5.36941	7.17266	5.81768	5.41665	5.84412	6.52602	6.06217	6.53241	6.10981	5.70825	5.71214	5.87795	5.79586	6.01993	5.74764	6.11681	5.88623	6.2122	6.04737	5.84862	5.76451	6.51813	4.8755	6.33833	6.08204	6.13291	4.89764	6.95072	6.04544	6.04914
ACPP	1.54992	1.21917	1.80917	1.17991	-0.331782	1.67495	1.48324	0.149124	2.49487	1.02604	0.744605	1.41495	0.566376	1.65944	0.540929	0.867964	3.96201	0.417745	1.03514	0.703093	0.178692	0.23556	0.855823	0.260527	0.434087	0.552429	1.22504	1.19842	1.22757	2.90555	1.28209	1.30684	1.20415	1.25272	1.21082	1.43877	1.21439	1.23097	1.24619	1.25113	3.17328	1.23577	3.00461	2.86082	1.2505	5.07611	1.21082	1.20366	1.29677
ACPT	4.43245	5.27561	4.4076	4.81119	4.68122	5.2478	4.33954	5.45695	4.14795	5.3822	4.65792	5.22815	4.87476	5.45078	4.98239	4.39176	4.15921	4.46132	5.17807	5.10911	5.33633	4.33954	4.36795	5.12241	5.39792	4.19135	4.1735	5.0447	5.0447	5.32706	5.00585	3.66393	4.72195	5.04769	5.09273	4.84294	4.60009	4.07601	5.48578	4.66929	4.26052	3.76549	5.6032	4.87028	5.08104	5.25932	4.87677	4.14926	4.19135
ACR	2.09974	1.3053	4.7851	2.60171	2.34212	3.6768	3.92405	0.881286	4.09251	5.09828	3.54791	1.46844	4.31006	5.37905	4.76168	3.72481	1.93489	3.39139	2.7519	3.58823	4.6551	3.9452	3.15238	3.68998	3.45592	3.76549	0.847445	4.44506	4.36052	3.62494	5.17954	4.21055	2.43305	3.95736	0.831548	5.59306	3.23214	3.75597	4.63932	4.98089	2.64699	4.05415	2.87272	6.55526	4.62995	3.00629	3.85276	3.52591	4.56152
ACRBP	2.2072	3.64993	3.27535	3.53206	0.863176	4.1704	4.42036	1.9126	3.66543	4.49258	1.70025	4.96902	2.9039	4.29778	3.60219	3.48011	3.58877	3.8445	3.91419	3.6244	4.00768	3.19568	2.55785	3.94436	3.6526	3.10077	3.67235	3.21931	2.97374	4.60239	3.69592	4.02005	3.82528	3.10293	4.67272	2.58157	3.22437	4.19691	2.59972	3.14501	3.63648	3.70044	3.96294	4.1987	3.54751	3.40998	3.9273	3.83545	3.5511
ACRC	4.2109	4.32642	4.37066	4.742	3.37089	4.4366	3.49864	4.11291	3.97054	4.15741	4.09961	4.5568	3.81294	4.58963	4.78002	4.51828	4.8453	3.47768	4.92659	4.11948	3.29903	4.18113	4.30184	4.09299	3.56597	4.38364	4.38364	4.66485	3.89692	3.33187	3.93633	3.76859	4.02706	3.58662	4.02131	3.46116	4.47107	3.85559	3.72335	2.60752	3.05011	4.94511	2.86228	3.49695	4.29398	3.99533	4.16413	3.17721	4.64739
ACRV1	3.73365	3.00917	3.93922	3.17199	4.17179	4.80814	3.42679	4.54904	4.12224	5.21347	3.79746	4.5227	4.60783	4.29356	5.32958	4.12761	4.56108	5.60059	4.26951	4.35423	4.30497	3.89469	4.11339	4.39742	4.49675	4.12851	3.92213	4.34279	4.78976	5.3321	4.3805	5.30832	3.85459	4.25016	4.65164	6.18386	5.12427	5.07097	4.51828	4.25109	4.3091	3.2527	5.74369	6.01855	5.43928	6.23235	4.50545	5.41004	4.16378
ACSBG1	1.64735	4.26494	3.82179	2.89226	1.41606	3.9535	3.06177	3.94478	3.61598	3.64315	0.877024	4.42759	2.8749	1.44784	3.65369	3.13507	2.52671	3.03503	1.84958	2.40115	3.17532	3.20375	2.17718	4.21662	3.1279	2.36297	2.78462	2.40807	3.53206	3.48697	2.17118	4.13848	2.90323	3.7435	3.21568	2.72089	3.77166	3.32103	2.71974	3.60394	3.84205	0.509331	2.27162	3.34313	3.7779	3.14816	4.0378	2.88793	2.93222
ACSBG2	1.52866	0.787032	1.40459	0.197423	3.54958	4.08607	1.2856	1.26871	1.70208	1.15476	0.710002	0.896309	2.22849	1.24445	2.90885	1.44729	1.42799	2.60261	1.36297	1.07611	2.39332	1.17842	1.38657	0.788762	1.26566	0.830772	0.738583	0.717336	0.738583	2.16299	0.787871	4.33305	0.73498	0.770316	3.11875	0.948024	1.69128	0.756787	0.771103	0.765346	0.757468	0.766886	3.59608	0.874184	4.0883	2.76309	3.27405	1.98591	1.20522
ACSF2	5.26792	5.79322	6.44209	6.264	6.29574	6.58558	5.59537	5.87392	5.95227	6.28658	6.61986	6.6822	6.60628	6.42972	7.00945	4.80055	6.23235	5.44256	6.02218	6.14852	5.5041	5.95803	5.74085	5.94993	5.84054	5.89861	5.47461	5.40121	5.7802	6.17261	5.72152	6.19561	6.50281	5.30516	5.18189	3.41793	5.16273	4.92092	4.3875	1.68548	6.49079	5.39353	5.89301	6.32473	6.57847	6.65645	5.2738	6.34017	5.51981
ACSF3	3.63472	4.2421	4.12092	1.47471	3.24161	5.18373	3.70103	3.46977	3.32901	2.93711	4.80496	3.86796	3.39183	5.17637	2.85984	3.36919	3.95258	1.807	4.18636	3.67785	4.4076	3.56276	3.31759	4.02762	3.78534	3.45235	0.980098	2.64584	3.99242	1.00949	1.04202	3.31836	0.96319	3.03188	2.07859	1.20225	2.97781	4.06101	2.93499	1.00237	2.90718	4.7361	4.66725	3.66451	4.23215	1.11895	4.07051	3.42513	3.85661
ACSL1	9.12932	9.21442	9.70288	9.25974	10.0797	9.9672	9.64393	9.02998	8.98811	9.08426	9.37373	9.06945	9.47764	9.59102	9.4147	9.1429	9.24878	9.22481	9.43865	8.52412	9.90364	9.69961	9.33206	9.41935	9.5194	9.88286	9.35465	9.28818	9.12211	9.99101	9.0093	9.16026	9.20384	9.2384	9.80657	9.66665	9.26884	8.87173	9.56598	9.20558	8.99139	8.87028	8.68157	8.9936	9.23368	9.31901	9.893	9.60985	9.15271
ACSL3	8.1668	7.87583	8.15146	7.74731	8.05933	7.918	8.49779	8.02141	8.37064	7.95807	8.66348	7.96583	7.96434	7.88835	7.86493	8.19863	7.45171	8.1271	8.33862	7.78822	7.86493	8.27805	8.38244	7.95974	7.68814	8.26715	8.02739	8.1271	8.05413	8.08307	8.59102	7.8543	8.33776	8.03526	8.11024	8.2457	8.05592	7.70029	8.25676	8.06186	7.50786	7.74731	7.49914	7.75276	7.86866	8.14533	7.83621	7.76411	7.70221
ACSL4	4.73387	5.32015	5.05802	6.15372	5.01192	5.37977	5.51091	5.45315	5.37977	5.7718	5.4297	5.90329	4.91902	5.54006	5.36222	5.73502	4.89831	5.44536	5.40713	5.37905	5.14594	5.26673	6.3225	5.972	5.4594	5.29474	5.59792	6.11681	6.03093	5.82708	5.77298	5.84862	5.288	5.12894	5.82527	5.31748	5.82604	4.97157	5.46134	5.75356	5.20876	5.05621	4.32897	5.27992	5.23214	5.11676	5.2095	5.33914	5.45047
ACSL5	5.34087	5.35694	5.1346	5.23349	5.31975	5.28409	5.76791	6.00762	5.14402	5.52953	5.20387	4.81761	5.57979	5.7399	4.82124	5.43593	6.00578	5.44185	5.44677	5.08477	5.25253	5.41788	5.61611	4.64904	5.48136	5.74764	5.22667	5.32633	5.23687	5.49671	5.64023	5.43963	5.5728	5.14446	5.2753	5.13172	5.07611	5.63378	5.74826	5.64231	5.81338	5.35134	5.80128	5.98274	5.93458	5.43002	5.52654	5.85143	5.73845
ACSL6	1.10514	3.35105	2.74258	3.64487	3.17137	2.86147	3.07312	2.94373	3.07124	3.20629	1.68307	4.03519	2.89859	2.5607	2.13195	3.62333	1.49389	2.96114	3.61703	2.91379	3.07945	2.91293	2.52814	3.05895	2.87429	3.3731	2.93064	3.54449	3.73163	3.59858	2.31475	2.67045	3.25089	2.63382	3.67294	0.996803	3.18199	3.24974	3.05895	2.11486	3.11754	3.45354	0.874184	0.921301	3.08704	0.9259	3.96156	3.72798	3.23854
ACSM1	1.5392	1.61247	2.02546	0.182165	0.0759132	1.25367	1.04479	1.91199	1.57661	2.41902	0.0892679	1.29076	0.960564	1.59614	0.636707	1.06541	1.43464	1.23469	0.434087	0.605982	1.45416	0.724316	1.22655	0.844961	0.909142	0.901351	1.35236	1.33199	2.92833	1.39292	3.38395	1.44127	1.33319	1.39082	1.34246	1.57835	1.34757	1.36297	1.37789	2.75908	3.26139	1.3654	1.41443	1.49989	1.37628	1.48381	1.34596	1.33741	1.33378
ACSM2A	0.790469	1.78441	1.79717	2.46579	1.10337	0.201792	1.37628	2.50581	0.0845237	1.532	1.59194	1.76553	-0.383305	3.08297	0.651607	0.171855	2.49593	1.74871	1.67092	0.725121	3.66996	2.08354	1.04895	1.58955	1.21982	0.986115	0.841207	2.93292	3.08435	2.68303	0.900668	0.912096	0.842761	0.879837	0.824316	1.06183	0.83516	2.92764	2.89226	2.90323	0.851127	2.75001	3.72335	2.42728	0.870615	3.48381	3.09749	2.87896	0.844246
ACSM2B	1.37031	0.0367425	3.13364	1.52406	2.13195	0.874871	1.17991	1.12172	2.80574	1.7081	1.19564	3.37596	2.69997	2.85193	1.18396	1.45665	1.13805	0.820283	1.17991	1.88243	1.72718	0.918814	1.78243	0.912724	1.46294	0.812323	1.00237	4.09746	2.63881	2.89638	1.06541	2.92833	1.34471	1.03678	2.15922	3.59512	0.99938	1.0194	1.02662	1.02662	1.95062	2.50341	3.31586	2.51875	1.03073	1.13954	2.11126	2.75995	1.17513
ACSM3	0.771103	2.73419	1.6691	3.29646	2.68203	1.45209	3.57707	2.67494	3.22808	3.95872	3.68502	2.58768	3.70795	2.22197	1.61247	1.35147	3.07312	3.20694	0.669999	1.37901	2.96114	5.54883	3.84647	0.710002	1.29623	1.38703	0.852611	2.29982	1.42954	0.867964	2.48548	3.83905	0.851127	0.891707	0.837476	4.22423	0.845759	3.93208	0.88582	0.871237	0.860889	0.880586	0.933759	0.991981	2.24491	0.991346	0.84206	0.825851	2.81337
ACSM5	4.4677	4.39742	3.92876	4.13247	3.19015	3.43561	4.22958	2.9998	6.47971	5.8228	4.43847	4.51988	4.20184	4.20184	4.82416	4.41459	4.49345	2.98496	4.30184	3.9081	2.46143	3.75597	3.54072	4.11241	4.15168	6.37444	4.1987	3.06631	2.73894	5.09713	4.89609	4.93259	3.89133	3.41388	3.72639	4.74811	3.70985	5.3964	4.71885	4.43882	4.86277	3.44046	5.288	5.28409	5.57488	6.0784	4.41506	4.73518	2.85596
ACSS1	6.668	6.07423	6.23815	5.94712	6.93997	6.64649	6.67637	6.13362	6.32473	5.45117	6.35854	5.88003	6.24638	5.71553	5.42079	5.92022	5.22207	5.99757	6.6989	5.28573	6.62133	6.42814	6.11257	6.4649	6.85093	6.55692	5.89268	5.35403	6.1247	6.15107	6.36227	6.27576	5.36872	5.89967	6.13791	6.27797	5.40961	6.12324	5.81622	6.21183	6.62864	5.87726	5.96862	6.53046	4.76727	5.71246	6.42411	5.74439	5.52153
ACSS2	6.93647	7.39964	7.94284	7.56835	7.73445	7.48381	7.76546	6.66407	7.29234	7.55977	7.95639	7.4863	7.81317	7.80832	8.35709	7.36031	7.18125	7.44579	7.56576	6.93046	8.06251	7.83275	6.70951	7.01139	7.01665	8.04603	7.33154	7.38046	7.26845	7.70029	6.92073	7.90098	7.39272	7.45888	7.7973	8.42754	7.13472	7.45529	7.16335	7.03717	7.90832	7.32891	8.26891	8.85681	7.80143	8.83301	7.50786	7.94152	7.68945
ACSS3	6.22456	6.62303	6.46915	6.51508	6.55859	6.95034	6.75615	6.12537	6.64841	6.86064	6.78218	6.61522	6.28013	6.99422	7.40382	6.42848	6.37287	6.39866	6.67637	6.20269	7.1823	6.84295	6.42848	6.98484	6.30605	6.50598	6.71791	6.74421	6.55908	6.659	6.42591	6.77271	6.65645	6.40303	6.87473	6.73589	6.75746	6.57378	6.45219	6.67002	6.64175	6.44512	6.12853	6.40226	6.22421	6.415	6.70904	6.83062	6.12395
ACTA1	11.4609	11.7294	11.2955	11.6763	11.9109	11.7294	11.3456	11.8035	11.4609	11.6271	11.9109	11.7294	11.4609	11.8035	11.7294	12.089	10.3681	11.7294	10.9405	11.8035	10.9548	10.8285	11.8035	11.9109	11.8035	10.5605	11.8035	11.6763	11.6763	11.2387	11.6271	11.7294	11.7294	11.7294	11.6271	11.8035	11.7294	11.5773	11.6763	11.8035	11.5773	11.8035	11.8035	11.6763	11.4112	11.9109	11.4112	11.2671	11.9109
ACTA2	10.0014	9.60425	7.86575	7.34363	9.08576	7.56893	7.1381	7.727	8.22208	6.9773	7.47974	7.94812	7.62685	7.34141	10.0722	6.79972	8.2417	8.71148	7.25222	8.03697	7.65282	8.4845	7.98323	8.49227	7.79044	8.90584	7.81967	7.33636	7.87652	7.37563	8.16838	8.31187	8.35606	7.90023	7.29084	7.64343	8.25483	8.39494	8.79966	8.73508	8.49024	7.60003	8.2486	8.0166	7.4931	8.31032	8.01196	8.12798	9.80948
ACTB	10.2073	10.1361	9.43865	9.86438	9.68266	9.6467	9.68798	10.3255	9.5086	9.59102	9.12054	9.5734	9.76241	9.63868	10.145	9.25726	10.6043	9.64393	9.69068	9.61515	9.62286	9.65586	9.86704	9.66665	9.83441	10.1413	9.83728	9.54803	10.0284	9.62286	9.83728	9.98434	10.0678	9.66903	9.98434	9.77292	10.0322	10.0444	9.93294	10.1413	10.0171	9.74082	9.58592	9.7764	9.46265	9.88579	9.70288	9.99435	10.8619
ACTC1	11.9109	11.6271	11.9109	11.5773	11.7294	12.089	11.7294	11.4886	11.6271	11.6763	11.7294	11.6271	11.8035	11.5096	11.6271	11.6763	11.1132	11.8035	10.8088	11.9109	11.6763	12.089	11.9109	11.6763	11.7294	11.6763	11.7294	11.6271	11.9109	11.9109	11.8035	11.9109	11.8035	11.8035	11.8035	11.9109	11.5773	11.8035	11.8035	11.7294	11.8035	11.6271	11.7294	11.6271	11.9109	12.089	11.9109	11.9109	12.089
ACTG1	10.6303	10.6043	9.57591	10.331	9.60179	9.70288	9.5734	10.4997	9.73816	10.1939	9.48531	9.79155	9.88579	9.85052	10.653	9.18655	10.8515	10.0639	10.0246	10.3065	9.57074	9.91972	9.66139	10.1237	10.3477	10.4035	9.80339	9.71494	10.1076	9.68006	9.86438	10.189	10.1116	10.1627	10.0993	10.1413	10.1198	10.471	10.0762	10.1237	10.2031	9.99101	10.2776	9.88579	10.0284	9.86141	9.99778	10.0722	11.001
ACTG2	6.27425	5.81996	6.57808	5.55754	8.07394	7.21739	6.23851	6.29052	7.4275	5.65481	6.84793	6.78472	7.01092	6.29831	8.37534	6.19291	6.21379	7.9994	6.17002	6.13144	6.19457	6.48338	6.81578	6.56466	6.20835	7.59409	6.8223	7.15521	7.34363	6.74669	5.94679	7.25013	7.23857	7.28799	7.14053	5.93906	6.61004	6.94903	6.38734	6.51235	6.98261	6.6359	6.22933	7.75549	6.89342	6.47245	6.80951	6.49644	7.36689
ACTL6A	6.40265	6.63033	6.53083	6.82485	6.73366	6.81141	6.51701	6.97275	6.85057	6.63934	6.69928	6.67914	6.42552	6.468	6.27934	7.13421	6.58288	6.72969	7.00945	6.50828	6.59797	6.8777	7.23507	6.81445	6.89215	6.7771	7.23754	7.23135	6.67122	6.97275	6.76343	6.89705	6.74421	7.04	6.95034	6.74993	7.16587	7.11584	6.78388	6.52077	6.45851	6.47473	5.91887	6.63893	6.59069	6.47821	6.72058	6.88161	6.69118
ACTL6B	3.77012	2.11353	1.43052	1.96721	2.79536	1.53465	1.54079	3.69356	1.68251	3.6824	1.79043	1.68734	2.51522	3.23917	4.60333	4.43752	4.31356	4.53732	4.52691	4.45132	4.77915	4.34279	4.73234	4.55806	4.58404	4.7485	0.139764	0.134567	0.135641	0.133683	0.137795	0.136618	0.130235	0.132607	0.130235	0.173755	0.138676	0.140616	0.137795	0.130235	0.133683	0.140616	0.154631	0.15731	0.137795	0.162322	0.128661	0.132607	0.136618
ACTL7A	1.08362	0.549089	1.66397	1.7118	2.78689	3.88535	0.568939	-0.157248	1.66622	3.9649	4.20549	4.23396	3.52986	0.130235	1.37628	1.66288	0.713763	1.23846	1.85029	1.27073	1.31355	1.68251	1.79238	1.70692	1.5331	1.1202	1.09768	1.07674	1.10337	1.13692	1.15851	1.18304	1.08305	1.13581	1.09406	3.54639	1.10164	1.11146	1.12509	1.12509	1.12067	4.34822	5.59718	1.24269	2.20333	4.5391	1.09008	1.08172	4.80012
ACTL7B	0.982652	2.87716	1.91646	0.912724	2.07733	0.153905	1.11783	4.26595	1.51474	1.97446	1.47908	0.580147	3.04726	1.46001	1.36611	0.130235	1.15639	1.04544	1.38774	1.46661	2.89703	1.04999	0.710896	0.287162	2.33643	1.09768	3.06302	1.51635	1.53804	1.57205	1.59194	1.62069	1.50653	1.56748	1.5231	1.77282	1.5231	1.53465	2.72621	1.55625	1.54079	4.68253	1.58792	1.6807	1.55218	1.67661	4.55587	1.51946	1.51193
ACTL8	0.137795	3.10542	0.696252	0.98459	1.30389	1.12067	1.06664	0.862393	0.16015	0.893634	1.52762	1.0283	0.848169	1.17891	0.203929	0.956027	1.11146	0.942475	1.64958	1.12278	-0.469252	0.156444	1.5823	0.965023	1.35408	-0.0701203	1.43167	1.41495	1.44191	1.47528	1.49772	1.52501	1.41349	1.4671	1.42848	1.67092	1.42848	1.44383	1.45613	1.45884	1.44529	1.44937	1.49327	1.58073	1.45466	1.57267	1.43277	1.42062	1.41399
ACTL9	1.91646	1.56748	1.28976	1.90206	2.68614	1.5397	2.15683	0.21475	0.277554	1.04343	1.99754	2.28904	1.27274	1.35033	1.93303	0.40798	1.13009	1.07375	1.06664	2.47785	2.15207	0.863176	0.322491	1.60678	1.28871	0.867964	1.89761	1.88346	1.90832	1.95788	1.95871	2.00086	1.868	1.93489	1.88003	2.29431	1.90118	1.89669	1.90927	1.91016	1.91199	1.88527	1.93875	2.09368	1.90273	2.08972	1.87908	1.88164	1.85949
ACTN1	8.05841	8.22023	6.88898	8.02141	6.65606	6.78831	7.02223	7.74193	6.96433	7.27271	6.55481	6.86934	7.16432	7.29594	8.79828	6.48838	7.75891	7.17585	7.37615	7.28147	7.1337	7.0608	7.39791	7.89944	7.25379	6.87645	7.29234	7.28851	7.37615	6.89919	7.2896	7.32228	7.25723	7.04744	7.47856	6.95929	7.81099	6.89258	6.96301	7.6901	6.8127	7.34469	7.19695	7.18075	7.224	7.19904	7.17741	7.12611	8.16838
ACTN2	10.0444	10.2342	10.3065	10.4079	9.99435	10.3255	10.3255	10.3159	10.8193	10.7223	10.3681	10.2824	10.5485	10.2964	10.7995	10.5124	9.75011	10.189	10.3681	10.3621	9.99778	10.2031	10.5793	10.4883	10.3412	10.1764	10.2483	9.97375	10.5434	9.97375	10.439	10.1489	10.2964	10.5312	10.3159	10.6677	9.92295	10.0171	10.0722	10.2483	10.3776	10.7133	10.4035	10.5371	10.2776	10.4126	10.1316	10.0444	10.0057
ACTN3	3.70311	3.24042	3.43055	0.951833	3.21997	1.5846	2.80745	0.446691	0.555918	3.92405	0.607525	2.07042	1.69909	3.96067	2.57612	1.66863	1.0636	1.16577	2.21689	2.6841	1.20787	1.03073	2.74916	3.75403	3.57944	1.98818	1.21704	1.19092	4.16019	1.25272	1.27321	4.4272	1.19504	3.25396	1.20061	1.429	1.20639	1.22189	1.23577	5.21421	3.86845	4.06143	3.88535	3.87473	4.52196	1.35147	1.20266	2.92241	1.19958
ACTN4	7.33428	6.79365	6.95343	5.83047	7.04287	6.422	6.99384	6.84125	6.71422	6.05361	6.41298	5.76683	6.56352	6.3452	7.37615	5.51852	6.26635	6.42848	6.29211	6.49187	6.91601	7.13263	6.05637	6.92073	6.51623	7.09064	5.78769	5.6559	5.92302	5.7749	5.01978	6.03024	6.45619	6.70231	6.27349	6.72536	6.18733	6.56204	6.59722	6.62993	6.1831	6.52683	7.32393	6.90428	6.69759	7.19305	6.71873	7.10504	7.1779
ACTR10	9.36892	9.52138	9.44989	9.10199	9.52849	9.60179	9.28818	9.39486	9.17765	9.41935	9.3389	9.31711	9.26884	9.45995	8.55825	9.59873	9.1429	9.27775	9.2924	9.0965	9.30827	9.18449	9.98434	8.99933	9.49345	9.45778	9.0803	9.82812	9.12932	9.28414	9.26404	9.62555	9.13095	8.99551	9.24463	8.94999	9.20968	9.06608	9.2361	9.2361	9.60684	9.30827	9.18214	9.3481	9.52618	9.50381	9.56348	9.52849	9.33206
ACTR1A	7.14801	7.84997	7.59354	8.12884	7.25175	7.56038	7.29186	7.5461	7.33919	7.86161	7.40442	7.80401	7.30368	7.75495	7.26457	7.48981	7.79602	7.69862	7.93391	7.78546	6.71378	7.34681	7.25969	7.61805	7.62876	7.34681	7.78134	7.75209	7.53299	7.35538	7.21995	7.60215	7.48027	7.44884	7.4863	7.46785	7.68428	7.51293	7.37388	7.3843	7.64526	7.73509	7.77218	7.93605	7.74445	7.91128	7.92713	7.87114	8.0136
ACTR1B	7.43544	8.37241	7.66001	7.9542	7.56893	7.79256	7.58003	8.26891	7.42348	8.06021	7.48513	7.74798	7.53459	7.59596	6.98883	7.77978	6.74042	7.75414	7.72488	7.27614	7.90171	7.26792	7.5031	7.76612	7.57943	7.61548	7.60476	7.48381	7.30602	7.54235	7.26845	7.59942	7.45478	7.68485	7.59469	7.67251	7.78892	7.75006	7.32503	7.70597	7.76144	7.71318	8.10208	7.91582	7.93391	8.1255	8.11353	8.14268	8.09717
ACTR2	7.10593	7.16685	6.511	7.24076	7.19989	7.48137	7.40022	7.74731	6.78616	7.22815	6.78874	7.2618	7.18333	7.32555	6.66407	6.96977	8.2486	7.01665	6.9472	7.54235	6.7488	6.9649	7.42293	7.25013	7.21536	7.00403	7.02123	7.33746	7.47921	7.43436	7.18125	7.49648	7.22606	6.73081	7.52859	7.18489	7.19155	7.2159	7.61931	7.43706	7.04147	7.1906	6.49565	6.70951	7.11539	6.84084	6.70231	7.12511	7.0924
ACTR3	8.89967	8.69363	8.45981	8.8111	8.43752	8.35812	8.63776	8.86432	8.60889	8.59601	8.5861	8.59204	8.53605	8.60512	9.10063	8.37449	9.52365	8.48577	8.75841	8.69363	8.57099	8.86595	9.2361	8.6571	8.94999	8.48688	8.78996	8.73115	9.06105	8.66461	9.08237	8.81962	8.90287	8.72966	8.82274	8.50884	8.74193	8.70458	8.89818	9.31057	8.65599	8.61677	8.20537	8.5	8.45981	8.37241	8.17524	8.39494	8.73927
ACTR3B	5.33175	5.75024	5.31164	5.58765	5.72376	5.68305	5.58432	4.93097	5.40534	5.27152	5.28299	4.8288	5.21987	5.37612	5.61944	4.93338	4.49872	5.25326	4.61182	5.42762	5.65958	5.65377	5.62004	5.78304	5.16347	4.95406	5.80309	5.46646	5.61112	4.90421	4.54732	5.28685	4.95196	5.16228	5.70857	5.6187	5.42047	5.06862	4.99663	4.80852	4.99938	5.23497	4.36399	5.04941	4.79239	4.4012	4.65751	4.10314	4.78936
ACTR3BP2	3.26511	3.79542	4.02088	3.55644	3.15436	2.88635	3.08763	2.33643	3.39813	3.22863	3.59447	3.10015	3.06631	3.56438	2.99566	3.45692	3.30515	3.73683	3.26827	3.04482	3.92357	4.07795	3.79746	3.42085	3.3619	3.54848	3.5338	3.85226	4.07846	3.92973	3.38329	3.43614	2.94459	3.56906	4.02363	4.25109	3.40708	3.7944	3.16776	3.53875	3.73484	3.00191	3.58572	3.53491	3.73112	3.03262	2.58996	3.71356	2.83796
ACTR3C	4.5227	4.86109	3.18199	4.88257	3.45354	4.7855	3.21869	4.43847	5.45271	5.35066	5.8644	5.17426	4.99791	5.0754	4.28007	4.81635	4.63211	6.48489	5.29443	4.00328	6.36763	4.5773	5.56669	4.95073	3.92779	5.6018	5.42895	5.14678	4.8527	5.17073	4.62197	4.13887	4.80143	5.35369	5.37977	4.24565	5.1654	5.16886	4.46264	4.7859	5.23016	5.10477	5.32778	5.30984	5.19654	5.45271	5.23135	5.31309	5.04509
ACTR5	4.54732	5.04582	4.83211	4.58567	4.74487	5.02278	4.66276	5.31783	4.9202	4.49756	4.9202	4.62706	5.27497	5.34989	4.20876	5.19075	4.9414	4.93259	5.04391	4.6254	5.03279	5.01063	4.59007	4.75001	5.02508	4.71639	4.34279	4.67222	5.20491	5.23171	4.25432	4.63471	4.86446	4.86764	4.91561	4.5628	4.60712	4.25377	4.69759	4.506	4.69846	4.74326	4.9492	5.36366	5.15287	5.40892	5.00104	5.02657	5.05283
ACTR6	6.66718	7.06759	6.71746	7.17471	6.56117	6.67314	6.76564	6.81705	6.60766	6.78051	6.80785	6.80823	6.50748	6.64409	6.40226	6.91894	6.54144	6.44944	6.74421	6.16444	6.19743	6.58408	7.07226	6.69204	6.95201	6.66884	6.64752	6.97501	6.90709	6.96205	6.4389	6.58082	6.58882	6.52602	6.54777	6.5603	6.82035	6.75241	6.49565	6.3236	6.1218	6.47854	6.10205	6.13182	6.37327	6.24848	6.04874	6.19106	6.01159
ACTR8	5.98208	6.23815	6.64099	6.13708	6.30605	6.32622	6.33686	6.24459	6.27078	6.14086	6.57969	6.66407	6.3764	6.71119	6.1828	6.36929	5.96696	6.09627	6.49222	6.45453	7.0162	6.5603	6.831	6.97275	6.46882	6.58205	6.81779	6.65688	6.74183	6.18386	6.29021	6.18346	6.42848	6.33381	6.80279	6.24042	6.65942	5.64374	6.29869	6.2961	6.43854	6.53312	6.33611	5.86335	6.53654	6.08314	6.5884	6.31137	6.06657
ACTRT2	1.10009	1.80407	0.718163	0.531488	0.640264	1.20678	0.462524	0.601932	0.243614	1.28502	1.58847	1.03326	1.24936	0.910741	0.766886	1.59373	0.759106	0.77776	1.15142	-0.00505808	0.254804	-0.136194	1.0636	1.32669	0.808166	0.222758	1.26566	1.24772	1.27792	1.30434	1.32864	1.3552	1.25161	1.30389	1.25981	1.49013	1.26244	1.27595	1.28976	1.29774	1.28209	1.28365	1.32992	1.41948	1.3006	1.40459	1.26347	1.25509	1.2577
ACVR1	7.10272	7.36624	6.82522	7.14664	6.98064	7.07267	6.84339	6.79111	6.25366	6.7001	7.04873	7.34735	6.9844	6.97371	6.53241	7.26257	7.26023	6.65429	6.73409	7.08879	6.91061	6.86975	7.14935	6.90895	6.83779	6.78298	6.66479	6.98115	6.89488	7.10456	6.99904	6.92128	7.3463	7.18955	6.8966	6.75315	7.12511	7.12557	7.12252	7.59082	6.601	6.52811	6.60324	7.08332	6.96824	7.11809	6.83866	6.91981	7.22501
ACVR1B	5.2478	4.80885	5.51598	4.95369	5.13972	4.66884	4.9707	4.7953	5.16313	4.63802	5.37644	5.60136	5.20017	5.06784	5.52841	5.21776	5.10557	5.46758	5.32706	4.9665	5.15772	5.32706	5.00496	5.18808	5.36909	5.21872	5.09867	5.12507	5.30111	5.37574	5.972	5.04866	5.75102	5.53974	4.84457	4.84493	4.62912	4.75687	5.81302	5.93609	5.0042	4.83253	4.88959	4.93747	4.97855	5.21168	5.45695	5.20133	4.86361
ACVR1C	5.98101	3.08499	3.77203	3.96156	3.09749	1.96325	2.45039	1.41066	4.03169	3.83734	3.91941	2.35338	3.95828	1.5664	4.34597	3.07737	3.42787	3.90577	2.81247	3.86991	2.33855	3.87669	2.76568	2.95069	2.77168	5.90065	3.13295	3.11138	2.62881	3.09431	3.71445	3.87223	2.73992	2.8066	3.39073	3.43561	4.0799	3.68663	3.36731	2.93292	3.2527	2.43923	3.88874	2.67682	3.43936	3.46009	3.4547	4.40305	3.54791
ACVR2A	6.30674	5.58502	7.07179	5.83304	5.82908	5.80475	5.87552	5.78657	6.1831	6.35817	6.04951	5.75489	5.94128	5.59638	5.47132	6.34592	5.83157	5.82805	5.74479	5.79047	5.67879	6.2191	6.51395	5.86164	6.27038	6.31593	6.39787	6.25583	5.97168	6.02254	6.06175	6.12815	6.23047	6.18807	6.13673	6.34663	6.36227	5.86302	6.37523	6.16104	6.48489	5.72526	5.1654	5.81448	5.98061	5.83615	5.96169	5.95524	5.57377
ACVR2B	5.25518	4.68253	5.48372	4.77791	3.70044	3.12512	4.71849	3.97378	4.44021	5.34326	5.15101	4.33863	4.18069	3.52049	3.57651	5.39423	4.47628	5.27412	4.34931	3.90282	3.6154	5.01813	4.19334	4.43847	4.82	4.18769	4.48426	4.8719	5.28059	4.97244	5.27846	4.01348	4.68004	4.87318	4.5594	3.49261	5.18519	4.52949	4.89647	4.60746	2.78253	5.15772	4.33183	3.54848	4.15971	0.6972	4.41459	3.72172	3.70044
ACVRL1	5.40355	5.01552	5.33743	5.02552	4.16286	4.86197	5.11604	5.30832	5.36588	5.10644	5.1153	5.57908	5.28299	5.95298	4.61909	4.5702	5.84579	5.75024	6.30674	5.47537	5.49671	5.27449	5.17724	6.28125	5.28025	5.91507	5.91115	5.21132	5.38468	4.22234	4.72608	5.52189	5.76309	5.72087	4.90335	3.95872	4.70402	5.45353	4.77876	4.61515	6.08818	5.32958	5.86244	5.61944	5.652	5.24471	6.01459	5.86089	5.57451
ACY1	2.25689	0.755112	1.3006	1.33856	1.57101	1.14118	2.92392	1.06417	0.98671	1.94522	1.01391	0.980792	1.87146	1.09406	1.1691	1.54941	0.301428	0.218078	0.553963	1.23046	1.81429	0.874184	1.75185	1.78582	1.42167	1.28925	1.80199	1.80126	1.81429	1.85288	1.86891	1.90739	1.77478	1.84439	1.79789	2.18668	1.80199	1.80634	1.81889	1.82333	1.82248	1.80066	1.84958	1.99987	1.81889	3.71356	1.79521	1.79457	1.77359
ACY3	3.09287	4.08415	4.14982	4.07601	3.95558	2.13442	3.47956	3.75244	3.68094	4.68985	4.24565	2.14104	4.40963	4.79447	3.9958	4.41178	4.34046	5.14841	4.31798	4.39653	4.18769	4.35149	3.68874	3.91708	3.31642	3.99008	3.70645	3.44533	3.59654	4.8245	4.57643	4.62995	4.89524	4.37421	4.2109	5.75593	2.00418	-0.426546	4.14278	5.25407	3.69356	3.02934	3.97234	4.90734	4.43056	4.83168	4.98812	3.85937	2.95613
ACYP1	6.67751	6.2191	6.47409	7.03048	6.54545	7.08879	6.51971	7.00631	7.45046	6.43984	7.01139	6.74236	7.09504	6.50675	6.9143	6.56466	6.7608	6.71873	6.67227	6.73494	6.68384	6.64686	6.74323	7.43818	6.40735	6.46586	6.86606	6.97182	6.44588	6.54469	6.16517	6.32704	6.43289	6.54584	6.22149	6.31243	7.15788	6.75275	6.52602	6.05442	6.42629	7.07267	6.11297	6.3833	6.50954	5.7462	6.64534	6.33159	6.11459
ADA	4.96862	4.68166	5.92722	4.04867	5.45234	5.57908	5.80725	5.2095	4.99261	5.402	5.20491	4.42574	6.1453	5.86205	4.74018	5.2849	7.15093	5.04427	5.43184	5.55185	6.56204	5.73282	5.21028	5.13721	5.12392	5.27884	5.96696	4.72496	3.7269	5.04866	5.63994	5.00865	5.97488	5.61289	5.29407	5.17344	4.89036	6.51589	6.04874	5.31062	6.34331	5.53936	6.20079	5.594	5.55867	5.5141	6.24459	6.04992	5.06206
ADAD1	2.94373	3.89555	4.21397	3.70103	3.48114	3.51136	4.07895	3.41793	3.1614	4.4719	3.03572	3.62605	3.37203	4.19097	2.85895	3.82727	3.7173	4.16502	3.89287	3.48869	4.16682	4.02005	3.44652	3.86741	3.52804	3.45292	3.83356	3.8689	2.79536	3.81933	4.19385	4.91238	3.02568	3.80566	3.54553	4.5594	2.88793	3.40047	3.95695	4.01874	3.43345	3.3747	3.76004	5.1282	2.1231	5.17954	3.26398	4.16785	2.59429
ADAD2	1.31569	3.49154	5.1105	6.41875	1.29565	4.21313	3.10673	3.24786	0.728691	4.71885	0.31675	4.21837	1.4499	1.44937	3.84932	0.964392	2.60871	2.72436	2.78612	4.66408	3.71039	2.62617	1.42615	3.28915	3.07048	1.74735	1.4201	3.23038	1.43052	4.44067	1.48573	1.51138	4.8527	3.91326	3.63209	4.50301	1.41606	1.4323	1.44426	3.27296	4.08965	3.75799	5.14006	4.95121	4.27481	5.36294	4.30453	1.40955	1.40459
ADAL	5.93792	6.32935	6.50675	6.42591	6.61431	6.07108	6.09871	6.05403	6.57687	6.42591	6.45619	6.39558	6.37791	6.74757	5.60849	6.56117	5.64641	6.54584	6.42972	5.71067	6.54345	6.3811	6.98161	6.46365	6.36409	6.56243	6.55167	6.19457	6.43984	6.29869	6.54309	6.18923	6.12034	6.573	6.4274	6.12853	6.51884	6.39113	6.54619	6.51188	5.26593	6.49401	6.32826	6.44285	5.97488	6.3109	6.28052	6.18807	5.80652
ADAM10	7.55681	7.42034	7.12663	7.04608	7.48457	7.86575	7.5368	7.79992	7.4708	7.63237	7.55104	7.29482	7.40805	7.51532	7.01092	7.55398	8.16008	7.46401	7.52302	7.84519	7.29283	7.35581	7.89944	7.24265	7.67044	7.27992	7.21995	7.33047	7.80957	7.90898	8.06093	7.29594	7.7029	7.72488	7.24741	7.68166	7.59156	7.50854	7.76084	7.918	7.03855	7.57449	7.26216	7.15741	7.17585	7.15375	6.94221	6.85453	6.9723
ADAM11	-0.0510843	1.07833	1.68492	1.09717	3.68549	4.35813	1.75262	1.27595	2.96615	3.13507	3.56709	2.63969	3.40384	2.31184	1.09958	-1.13806	-0.185746	1.78301	2.53481	1.05296	6.01315	3.57592	2.83535	3.76496	2.92465	4.44506	1.49173	1.4806	1.5082	5.32236	4.13151	1.5874	2.51052	1.53258	2.67352	1.7401	1.49563	1.50549	4.41178	1.52552	1.51027	2.42728	1.55505	4.33093	1.52146	1.64291	1.49715	5.2091	1.47794
ADAM12	1.92599	1.53154	2.06921	1.56807	1.15747	0.502196	1.96436	1.6201	2.58901	2.82035	1.451	1.57101	0.238891	1.35355	1.67896	0.88732	0.86719	1.5082	1.37031	2.52214	0.922622	1.40857	1.50208	1.44333	1.32008	3.38329	1.65242	1.65715	1.67321	1.70742	1.72158	1.75931	1.88243	2.61065	1.6645	3.91941	1.65834	1.66863	1.68734	2.59429	1.68189	2.36013	1.71655	1.81967	2.38036	3.36919	1.66058	1.65658	1.64392
ADAM15	6.20697	7.31589	6.36006	6.10416	4.56464	7.19695	4.36319	6.54469	6.54777	5.41745	6.2301	4.92897	5.36177	5.08477	5.2026	5.43787	7.09457	4.1859	4.0658	5.45761	6.43324	5.35335	5.13088	5.5624	5.79185	5.79586	6.43533	6.32973	6.66636	7.06618	6.12815	7.04781	5.8245	5.95334	7.00589	6.5036	6.87473	6.58996	6.05709	6.67878	6.65341	6.25112	0.669999	2.78954	0.600663	4.07519	6.61702	6.57121	6.57378
ADAM17	6.11015	5.87795	5.40607	5.84862	5.70488	5.70154	6.12001	6.05129	5.88513	5.08368	5.14329	5.70857	5.76063	5.67556	5.83682	6.20731	6.43783	5.58765	5.54136	5.80546	5.25072	6.1831	6.17916	5.22132	5.67395	5.63632	5.74954	5.85655	5.94782	5.70712	5.95029	6.13402	5.79719	5.88513	5.8578	7.10407	5.81448	5.36765	5.86729	5.93681	5.9297	5.73135	5.92861	6.74794	5.61367	6.3229	5.32161	5.71106	5.8365
ADAM18	3.20873	2.53369	3.36977	1.8461	3.34777	3.41966	1.532	0.542348	3.54232	3.41499	3.33494	4.15556	2.66778	1.43418	1.91646	3.58823	3.19697	3.48235	1.8368	1.67556	1.89562	3.8378	2.90248	3.40431	2.88709	3.49052	4.68043	3.24098	3.17835	3.7207	2.81743	2.71582	3.59748	3.12647	2.78689	3.45354	3.13764	2.51875	2.6138	2.25967	3.02934	4.10508	3.51613	2.51355	2.42836	2.78171	2.55533	2.85751	2.76472
ADAM19	4.86235	5.8089	4.18718	5.3014	5.38836	5.8224	5.25407	5.10477	5.73072	5.28881	4.8381	5.26088	5.09517	5.51598	6.34624	5.62315	4.67969	5.18519	5.72339	6.31175	5.08999	5.17467	6.2	5.59827	5.86371	4.38883	5.79791	5.51372	5.88728	5.69005	5.3055	5.28059	5.43225	6.08913	6.02954	6.34176	5.79119	5.70825	5.61944	5.8511	6.07178	5.92085	5.72188	4.01665	5.2959	5.37681	5.42008	5.48211	5.62942
ADAM2	0.911443	0.939747	0.20133	0.2288	1.49901	0.210941	1.07674	1.60678	1.10396	3.9373	1.10581	1.76492	3.41222	1.12725	2.42728	1.27495	1.94323	1.294	1.39751	0.0759132	1.46345	1.22811	0.833771	1.46345	1.16353	1.67953	0.442848	2.25199	2.94082	2.70526	2.04371	3.68874	1.66008	3.17328	0.405388	2.58901	0.438287	1.30872	1.5488	0.438287	0.44475	0.680478	2.80745	0.574466	3.51287	0.575856	0.415783	2.2611	2.18934
ADAM20	2.50341	2.25199	3.8924	1.48173	0.153905	3.67187	1.69128	1.16525	3.56816	3.34131	2.12431	3.94164	3.36977	1.78582	5.11095	2.1905	2.23329	2.6894	1.72107	3.86034	2.76568	3.2176	1.58173	2.88855	1.18767	1.31142	2.60661	4.38542	4.60746	3.09149	4.15741	4.48142	1.02604	1.08052	3.67949	3.4564	1.04092	2.17247	2.45662	2.88548	4.35062	3.67733	1.11446	3.5511	1.07037	2.74181	1.03011	2.87429	1.04274
ADAM21	4.0112	3.23214	3.14001	3.14741	2.76078	3.61895	2.97068	0.512809	3.85616	3.32398	3.39813	4.14702	3.50629	3.35684	2.42413	4.12273	4.50254	3.81994	2.70622	3.6824	2.05784	2.30782	3.51028	4.49872	3.65951	2.00086	2.41266	2.59753	2.50465	3.02865	4.45132	2.12964	3.11212	2.60171	3.11546	3.72798	2.71582	2.50941	4.32229	3.02996	3.37256	2.81838	3.74899	2.39991	3.37036	3.00259	2.50341	2.52457	3.05829
ADAM22	4.10921	4.16633	3.35684	2.95613	2.00643	3.27296	2.79536	0.894878	3.08633	2.92833	3.27798	3.56033	2.39213	3.74947	2.50581	4.05688	3.46921	3.31836	1.38414	3.78735	3.42146	3.17257	3.16269	3.54498	2.80316	2.68518	3.26827	3.34661	3.79955	0.392197	3.01049	2.55533	3.35451	3.56764	4.03961	3.88582	3.22374	3.40279	2.72436	2.97374	2.25079	3.17835	0.491468	3.87423	3.28016	3.3379	2.2008	1.47581	3.65056
ADAM23	6.37402	6.40885	6.831	6.54545	7.05503	7.09194	7.14801	6.15617	6.57887	6.79013	6.73006	7.3843	7.04873	7.13764	6.00578	6.42515	6.29128	6.80097	5.91296	7.19904	7.10178	6.95847	6.67271	6.77413	7.0128	6.87561	6.5991	6.9427	7.20485	7.44988	6.76038	6.24848	7.2276	7.24076	6.60408	6.80951	6.14562	6.14239	6.89531	6.28658	6.44879	6.58247	6.67043	6.42163	7.03048	6.60067	6.53737	6.90522	6.39076
ADAM28	2.31184	1.18261	1.89761	3.11076	0.138676	1.60028	1.33093	3.66884	0.164216	0.804126	1.11714	1.88164	0.224419	1.64392	-0.0238596	1.42167	1.51579	2.07291	0.197423	0.122628	0.936693	1.64552	2.10363	1.24108	1.47422	0.133683	1.23209	1.94231	1.23734	1.26871	1.28976	1.31669	1.21281	3.39242	1.22189	1.44937	1.22602	1.23898	1.25457	2.9842	1.24772	2.31876	1.28925	1.38273	1.26144	1.36831	1.22037	1.2133	1.89761
ADAM30	3.20375	3.65951	1.67896	2.15683	2.08706	3.00783	3.62494	1.4323	1.35355	4.27481	3.39919	1.06239	3.2839	2.85531	2.34329	2.56486	3.18011	3.49754	2.52214	2.3617	3.59072	2.58551	2.60752	2.9539	2.78171	2.98496	2.87129	2.44403	3.49407	2.32774	2.3945	3.12867	2.60975	3.24284	2.97447	3.74441	2.41902	0.309246	2.79959	3.54639	2.77075	2.78842	2.1061	4.39528	3.03126	0.384302	3.31759	3.31905	2.27162
ADAM32	1.09065	2.98063	1.18261	4.74949	2.0425	4.26008	2.58901	2.53032	2.07291	3.9452	4.01306	3.57058	0.826807	4.05173	0.118619	4.3219	3.7829	3.41732	2.41902	2.10736	1.21029	3.12006	4.64167	1.3006	3.30018	2.96547	2.2413	3.57707	2.59972	3.60279	3.90898	4.09102	4.41297	0.319588	3.27914	3.56546	3.31127	4.17002	3.78432	2.54034	4.25605	3.88153	4.04387	0.470572	1.30169	3.73836	3.19697	3.69301	3.84105
ADAM33	5.91194	5.26188	5.1815	5.48342	5.2861	6.66718	4.95707	5.72596	4.48608	5.27992	5.74402	6.07577	3.54449	5.48683	6.72615	4.45823	4.03397	4.96561	4.59096	7.08614	4.15831	5.40168	4.14188	4.7759	5.00585	5.27017	5.84482	0.96319	0.982009	5.37206	1.05352	1.06127	5.28331	3.34661	0.970239	1.21126	3.454	5.18481	4.65827	5.13932	3.90673	6.13402	5.84307	3.19816	4.9731	3.73163	5.70121	5.19654	6.03614
ADAM3A	2.81152	2.5619	2.32516	1.82333	1.86033	0.335372	0.226843	3.17835	0.76776	2.3617	1.5823	0.577138	2.54773	3.22676	1.2333	2.61571	1.6691	2.15317	2.67682	1.49715	2.80396	1.34361	2.52108	1.16694	1.70085	3.21711	3.77111	1.59672	0.564963	2.99029	2.10363	2.80745	2.65444	3.69053	3.3987	3.23038	2.70102	3.23477	3.14741	0.580147	0.575856	1.84958	0.651607	2.33751	1.67263	3.28508	3.74849	2.57407	2.62693
ADAM6	0.835975	2.05784	1.6327	2.445	3.48492	0.526119	3.40544	3.0214	0.982009	4.42121	3.80664	3.73836	3.07448	3.48445	2.95226	1.32403	1.69187	2.1271	2.00196	3.10225	2.75617	1.63559	2.05997	1.2856	1.4403	1.87908	2.11126	0.865866	3.59748	3.7779	0.936693	2.77075	0.874871	3.7285	1.82859	1.0957	0.86993	0.900668	3.2019	1.79717	3.84052	3.32521	0.957322	3.8237	0.905228	3.02494	3.98094	3.18823	3.42085
ADAM7	1.17238	-0.0437051	1.03439	1.419	0.0802461	1.12405	0.432011	1.48573	-0.047219	1.10738	0.812323	1.00567	1.19504	0.743737	0.246364	1.6589	0.440577	0.764351	0.0623053	0.236774	1.08305	0.533073	0.510987	1.24936	0.448744	0.880586	3.75347	1.13692	1.16231	1.19622	1.22189	1.24564	1.14059	1.19143	1.15142	1.37526	1.15903	2.38153	1.18509	1.18767	1.18107	2.41636	1.21917	1.30169	1.18916	1.29348	1.15253	1.14354	1.15365
ADAM8	4.35062	1.6284	4.4012	3.61847	5.10356	2.50217	4.99938	4.12372	3.68042	4.27313	4.45007	3.52436	4.06046	2.51999	4.12674	3.9052	3.87325	3.55934	3.95828	5.57803	3.83905	3.36494	4.18678	3.53036	3.59608	3.8011	4.06676	3.98374	4.15971	3.63908	2.91197	3.05655	3.38	3.0781	3.75503	3.36666	4.07601	4.24871	3.91377	4.22064	4.18032	4.23669	4.92809	2.86834	3.17835	2.99491	3.51767	3.46659	2.36784
ADAM9	6.5943	7.46341	7.50671	8.07997	7.05369	7.74193	7.86161	7.76752	7.47028	8.11999	6.60457	7.39104	7.4182	8.23809	6.84503	7.63061	8.39076	7.3894	7.98729	6.70414	7.14469	7.71661	7.73445	6.98161	7.75006	7.56576	7.52426	8.01972	8.69749	7.9629	7.92394	7.81906	7.58003	8.07661	7.95807	7.71924	7.63876	7.07128	7.56835	8.43668	8.14011	7.24741	6.64962	6.91482	7.05173	7.26889	7.06405	7.04147	7.1337
ADAMDEC1	3.58712	4.22369	3.5338	1.74671	3.07124	1.79933	5.22545	6.06034	1.44237	2.79389	1.21495	4.29356	3.87223	3.11138	3.24284	3.23401	4.92697	2.02748	2.49487	1.50364	2.14231	3.53817	2.78365	1.88243	3.11012	2.837	3.45131	3.18823	4.24079	2.77168	4.36795	3.70454	3.0553	2.8271	2.88855	3.13566	3.86683	3.87958	3.8415	4.17936	2.85663	0.322491	2.55985	2.95769	1.97726	3.16709	0.472843	3.15627	2.3873
ADAMTS1	8.14972	7.74386	6.30136	6.35162	7.1089	7.02416	6.208	6.69242	6.28501	6.65521	5.90033	6.19743	6.60502	6.5155	8.37931	6.22568	6.43484	6.62171	7.09194	7.3843	7.8958	6.9427	6.10943	6.69242	7.35235	6.37523	6.92128	6.20913	8.03153	6.36608	6.23643	6.79013	7.48312	7.64126	7.11431	7.65748	7.05117	7.26889	7.09297	6.80146	7.07788	7.75142	7.26128	6.75902	6.63192	6.72575	6.55481	6.81779	8.37241
ADAMTS10	4.98274	3.78093	5.33071	4.06187	5.07757	4.0295	6.376	3.48283	5.56422	4.12552	4.50545	3.31905	5.22173	4.30962	7.02416	4.39007	4.568	3.9081	5.19616	4.64167	4.37948	4.65713	3.52634	4.44664	4.88297	4.27656	5.17073	1.19143	4.70672	3.74491	5.21387	4.28751	5.5417	5.35773	1.20171	1.42954	5.34364	3.63089	5.85979	4.98812	3.12712	5.15064	4.48608	4.61103	4.69681	4.90494	5.48613	5.30945	4.57999
ADAMTS12	4.7772	4.31843	4.39226	3.83953	4.43483	4.31745	4.75687	1.71586	3.81933	4.15343	4.52353	4.23045	4.60042	3.54027	4.89118	4.55769	4.1101	4.17573	3.88394	3.79078	4.05466	3.77203	4.53993	3.69208	4.20004	4.85505	3.5897	2.81838	4.0295	3.87525	3.85848	3.96253	5.1379	4.18069	3.77993	3.2491	4.06288	4.64824	4.32362	4.73811	4.7597	4.57682	2.70727	3.50241	4.47413	4.36282	4.53868	3.79647	4.53949
ADAMTS13	3.42301	0.771103	1.86033	2.57612	3.10225	2.80316	0.970239	3.63812	2.6841	2.58654	1.6979	1.28155	1.33798	2.89638	1.89018	1.56256	1.53614	1.66559	2.5382	3.63309	2.77651	1.7186	1.05476	1.45774	1.17347	1.31306	1.6166	1.61606	1.63509	1.66622	1.6807	1.71719	1.60852	1.66288	1.62237	1.89866	1.61714	1.62886	1.64392	1.64735	1.63949	3.57004	1.67444	1.77359	1.64447	1.77743	4.67643	1.61487	3.08891
ADAMTS14	4.45349	4.0344	5.67358	4.88091	3.59858	5.28215	3.66203	5.36941	4.07519	3.73365	5.77694	3.36666	4.97744	4.64292	5.48211	4.61909	4.39825	4.96256	5.19902	4.52783	4.61103	4.77055	4.48931	5.24558	4.40039	5.39938	4.24694	4.24565	2.34819	4.42673	5.2293	5.79517	4.06921	3.97653	3.75905	5.60849	4.14463	2.86228	5.24741	5.30411	5.05088	4.95196	5.88081	6.76391	5.12577	6.80995	5.351	4.64167	4.6521
ADAMTS15	5.93074	4.90177	4.5676	3.18625	5.8127	5.1755	4.89566	3.63258	4.64702	3.99617	5.18884	4.19833	4.69607	3.80353	4.75123	4.70896	5.07015	6.26929	5.36331	6.91563	6.05927	4.02658	4.3862	5.17467	4.45049	5.33246	4.14653	3.87371	3.37888	4.99419	5.59993	5.23566	5.12744	3.13764	5.10214	5.55185	3.2796	5.30805	4.91561	3.76905	4.47453	5.28409	5.6044	5.73777	6.51468	5.23534	6.02489	6.08024	4.16785
ADAMTS16	0.922622	0.692944	3.20129	1.05068	1.1155	1.01144	1.03624	0.644726	0.977435	0.948024	1.41855	0.516113	0.710002	1.95062	1.83183	0.492729	0.972791	0.922019	1.34471	0.937362	1.60974	1.08362	0.644726	0.250448	0.678647	0.636707	1.33631	1.31885	2.24248	2.28123	1.40018	1.42748	1.31719	1.37952	1.32817	1.56485	1.33427	1.35091	1.36355	3.7605	1.34878	1.34976	1.40497	3.12512	3.01573	1.47019	1.33042	1.3235	1.32157
ADAMTS17	4.54038	1.67834	3.04107	5.06005	3.42146	2.10862	2.14104	3.11609	2.42026	1.22707	3.68663	4.13384	2.84052	3.98329	3.41901	2.87035	3.27123	2.97587	3.88932	3.84105	3.76302	3.844	3.64385	3.20008	3.96865	1.46443	3.73895	2.59429	2.36904	3.01356	4.39176	3.50738	3.5338	4.02809	3.58363	0.640264	0.442848	3.60341	4.23669	4.04548	3.9407	3.5511	0.542348	0.580147	2.9063	3.12207	4.03641	3.60108	3.81346
ADAMTS18	3.0781	3.70254	2.94601	3.72172	3.49695	4.31611	3.75103	3.61325	3.81885	3.90233	3.60054	4.14068	3.44365	3.97521	3.67343	3.96909	3.61129	3.77385	3.33252	3.29047	1.5392	3.43614	4.10144	3.92488	3.20445	3.12647	3.14816	2.97714	4.15741	3.56853	3.16776	3.23144	4.36614	3.35105	3.25633	3.96678	4.26268	2.80489	3.40544	2.58157	2.82531	3.55055	3.35684	3.0397	3.70148	2.49873	2.9401	3.00629	3.38276
ADAMTS19	0.165751	1.42748	1.94039	0.982009	0.790469	2.8279	2.70199	1.25413	1.09889	0.0982195	0.534908	1.7754	1.21178	1.75115	1.13307	0.312953	0.179547	0.988619	0.497266	0.0510009	1.41948	1.98494	2.80316	0.742936	0.18583	1.13531	3.73209	0.680478	2.00643	2.41163	0.7462	0.758325	0.698025	2.83287	0.674124	0.912096	0.703093	2.68303	0.733118	2.40428	2.49873	0.733118	2.77821	0.838873	2.54357	2.97219	2.96329	0.665298	0.702228
ADAMTS2	4.33863	5.30314	3.89333	5.23459	4.01665	3.76302	3.71404	3.36494	1.41254	3.83636	2.26254	2.01402	2.6359	3.41607	3.43	1.78441	6.5914	3.30247	3.65951	3.39305	1.96056	3.51028	4.18956	3.33494	3.24223	2.8245	4.12463	2.09368	2.52903	3.19144	2.73021	4.45089	1.81583	1.29451	1.25211	3.7605	4.18769	4.38097	1.28155	4.55535	4.25558	4.62072	4.91561	3.9452	3.36494	4.62663	1.25564	3.77521	4.99938
ADAMTS20	1.31953	2.8159	2.80489	1.74563	-0.136194	2.5679	1.50706	2.73021	1.67834	2.93565	1.56308	2.72533	1.88086	2.9822	1.85029	2.43412	2.08972	1.71473	1.3358	1.7186	2.91036	1.47074	1.82171	1.18152	3.14613	2.69599	0.516113	0.462524	2.83287	3.03775	2.47029	1.92298	2.23329	3.39919	0.458605	3.51028	3.02494	3.24223	0.495205	0.519975	0.507474	2.68723	3.75503	3.52591	3.39183	3.14126	3.19206	3.44477	3.01573
ADAMTS3	4.03024	4.27265	2.86671	4.24289	1.7186	3.56816	3.86526	3.74197	3.54176	3.70499	3.87167	3.74548	3.76397	1.4552	3.15061	3.65056	3.896	1.77209	3.12149	3.76004	2.51522	3.25633	4.35236	1.88346	3.28263	3.24723	3.36977	3.89469	4.03169	3.18321	2.99637	2.76472	3.27467	3.20129	3.34489	3.39418	3.36321	3.20129	3.9535	2.73533	2.94907	4.03169	2.95313	3.81933	3.17951	3.47833	4.03689	3.77752	3.9814
ADAMTS4	4.65339	3.41966	3.88437	2.72533	1.52363	5.11095	3.08704	4.48656	4.59752	4.97024	4.46359	4.83336	4.71425	4.89609	5.68731	3.30623	4.69759	4.96937	5.07956	4.3756	4.68985	5.22545	4.07519	3.6244	3.35853	3.74899	5.05088	5.05659	4.91945	5.15661	4.66321	5.10688	4.01526	4.77876	4.71461	4.99984	3.98329	4.50091	5.27084	5.13685	5.1755	2.84772	4.77055	4.56891	4.00624	4.24781	4.75333	4.87358	0.349119
ADAMTS5	4.77306	4.30328	5.63412	4.02444	6.73993	6.05671	5.61546	5.1654	5.59718	5.26634	5.43522	5.4949	6.25259	5.34251	5.03096	5.28178	7.62126	5.2166	4.9359	5.48281	5.12392	5.16468	4.94511	4.82974	5.20491	5.57344	5.41374	4.61392	4.71849	5.4803	5.65447	4.27747	5.32925	5.02657	5.42008	5.35594	4.64292	6.82398	5.75426	5.62083	5.60947	5.36255	5.63489	5.06133	5.10952	6.16788	5.21244	5.97384	4.64167
ADAMTS6	4.17573	4.05955	3.16009	3.18491	2.63881	3.70311	4.16147	3.46338	3.87129	4.1305	4.52647	3.95258	4.0865	3.22437	3.03843	4.26494	4.00719	3.41047	3.12078	3.18823	3.95695	3.61703	3.83684	3.65111	3.11278	3.79131	3.51711	4.19135	3.36731	4.50996	3.48325	2.89401	4.16785	3.93783	4.17267	4.06101	3.72282	3.25572	3.21813	2.82614	3.70943	3.87669	3.79179	4.11198	3.15368	3.52146	3.23477	3.79179	3.71194
ADAMTS7	2.467	2.04039	3.69053	0.597049	3.76302	1.34129	3.56491	3.40431	4.03263	3.69725	3.38219	1.31409	4.36614	1.58283	4.48931	1.19143	2.414	4.09865	2.19338	4.14029	3.39183	2.23843	1.52463	3.71086	3.37888	3.0536	3.92684	4.05688	3.3619	2.55866	4.2892	3.61378	3.9711	3.99899	3.45526	1.96638	2.99491	1.67263	4.06876	1.6896	4.40347	4.07645	3.02208	1.8247	4.24443	4.37201	4.65422	4.2844	1.64735
ADAMTS8	2.75995	1.79576	0.829923	1.12509	3.05965	2.00523	2.34567	0.94747	2.50814	1.22504	1.6201	0.53638	2.65149	-0.010384	3.74197	2.5426	0.0802461	2.60975	2.81945	1.39188	3.47956	1.12725	1.64113	2.78689	2.02879	1.65416	3.45965	1.38549	1.41157	1.44278	4.35423	2.48033	3.12647	4.76727	3.71245	4.77016	4.26866	4.47022	1.42748	3.62985	1.41547	5.52689	1.46294	1.54941	1.42462	4.67179	1.40459	1.38881	1.38774
ADAMTS9	4.51246	4.17891	3.47833	4.16633	4.01348	3.8536	4.4596	3.78482	4.04816	3.92591	4.44545	4.16549	4.12139	3.53491	6.50748	3.67528	4.7407	3.85183	5.39865	4.35236	5.32814	4.85066	4.83492	3.57167	4.31968	4.91043	4.91154	4.99057	4.54418	3.86526	4.25149	3.98745	5.38113	5.12123	4.75733	4.42223	5.4444	4.73975	5.23214	4.74647	4.04296	5.6098	3.76302	4.49211	4.54038	3.65369	4.29913	4.00468	5.26148
ADAMTSL1	2.34939	1.64493	1.71719	1.93103	1.23427	1.65027	1.53465	2.54773	1.48269	2.8804	2.22333	-0.150316	0.159331	1.03259	1.39849	0.224948	0.578668	0.231117	1.20581	0.672014	0.0385103	0.460739	1.03981	0.730403	1.59556	1.40315	1.36196	1.34415	3.23099	1.40559	1.42417	1.45258	1.34415	1.40272	1.35408	1.59138	1.35575	1.37526	1.38881	1.39243	1.37184	1.3758	1.42366	1.51027	3.16512	1.49509	1.35802	1.34822	1.34654
ADAMTSL2	1.19842	1.54762	1.22655	1.77743	0.980098	1.13748	1.3235	0.77776	2.1905	1.00113	1.45774	0.518006	1.59194	1.45613	0.96243	0.832387	0.970766	1.01014	1.50263	1.67321	0.802509	1.62541	1.5488	1.34976	0.477096	0.0845237	1.67495	1.67556	1.69239	1.72718	1.73869	1.7796	1.66744	1.7186	1.68124	1.99514	1.67834	1.6879	1.70444	1.70561	1.70145	1.6896	1.73554	1.84191	1.70208	1.84346	1.68017	1.67615	3.77752
ADAMTSL3	5.41976	5.45426	3.60166	4.22649	4.55318	3.89938	3.90369	4.50688	4.25823	4.12413	5.77761	4.7445	4.54255	3.81294	2.61571	5.46799	3.57997	4.65467	2.75392	3.78432	4.62748	5.8752	5.36222	4.55362	5.00104	4.44339	4.42882	1.63042	5.13246	1.68492	1.69621	1.73293	5.41631	4.81447	4.18371	1.9202	4.88044	4.84649	4.85724	4.87444	1.65473	4.85933	1.6896	1.79177	1.65944	1.79318	1.63559	5.18189	5.98386
ADAMTSL4	3.76496	3.95963	4.65792	4.62154	4.34181	4.68939	4.39321	4.11776	4.57908	4.81522	4.67179	6.03395	4.81718	5.44826	3.31963	4.73194	5.43996	6.59797	5.12155	4.86522	5.00302	4.29442	4.33954	3.87574	4.36795	5.4297	5.11561	5.11492	4.87154	5.06616	4.05596	4.1987	4.04867	4.21009	5.928	5.44295	3.57109	6.29985	5.58957	3.9701	3.56438	5.48136	2.93222	3.36434	5.03697	3.70645	4.88091	4.39321	5.02102
ADAMTSL5	-0.0125548	4.46625	2.5382	3.35451	4.29731	4.74018	3.25503	2.32516	3.83318	4.283	1.29565	4.76854	1.07504	4.41086	5.20599	4.75525	1.33798	3.50849	3.32901	3.59229	3.6824	3.43397	4.14234	4.56108	4.20044	3.85319	3.77429	4.8284	4.5046	1.47745	1.50046	1.52709	1.41606	5.25481	4.37948	3.23401	5.56942	5.42481	1.46001	1.46227	2.09249	4.84563	1.49666	1.5846	5.2738	1.57551	4.15121	4.52231	4.62453
ADAP1	5.71833	5.69693	5.9654	6.5691	5.36366	5.4949	6.16247	6.05297	5.71833	5.18884	6.21264	5.288	6.59389	6.14312	6.08433	5.94782	5.57945	5.54136	6.73039	5.46346	5.53753	5.81962	5.26829	5.50083	6.39752	5.94742	6.65298	6.23769	5.60882	5.46723	5.76718	5.36177	5.92927	6.04655	6.01791	5.76487	6.08747	5.56986	5.64374	6.03861	5.81899	6.70097	6.58127	5.88826	5.40747	5.66881	5.48441	5.29966	5.99866
ADAP2	4.65751	4.62873	5.07757	4.22234	3.9814	1.84346	4.66019	5.17266	3.67294	3.54398	2.07622	2.72621	3.71194	2.08608	3.59748	3.96294	7.99134	3.42627	4.50135	4.31311	4.14926	3.74752	4.69234	3.6128	3.86526	4.16868	5.03532	3.84691	5.30247	4.59218	4.63932	1.06541	5.02236	4.86944	3.54398	1.21495	0.989937	5.8601	4.96602	5.30666	5.42591	4.88452	4.82078	4.82925	1.02115	4.28536	0.978153	4.99374	5.28331
ADAR	8.33577	7.82562	7.77978	7.2982	7.72421	7.19545	8.38026	8.06756	7.9946	7.69063	7.63364	7.55861	7.91582	7.36833	7.63305	7.86313	8.44223	7.56835	7.89515	7.81753	7.42084	7.65748	7.64895	7.61931	7.39272	7.63945	7.40211	7.31314	7.35687	7.24219	7.74063	7.3894	8.33956	7.8388	7.47187	7.77903	7.35113	7.65085	7.70533	7.65085	7.73034	8.08518	7.90446	7.58348	7.61931	7.72631	8.01803	7.57757	8.05669
ADARB1	4.39653	3.24537	4.03827	2.23843	4.58605	4.2097	4.37333	4.2849	4.73234	4.37066	4.31095	3.63209	4.38237	4.2623	5.42297	4.01526	3.78482	3.51136	3.64158	3.45235	4.69759	4.60009	4.10054	4.23528	4.52396	4.5619	1.9692	3.40279	4.38097	3.35331	4.79709	4.41041	4.62111	3.49154	3.66393	4.41857	2.59429	4.00624	3.91659	4.14795	4.15121	4.63511	3.99533	3.18625	3.81104	2.64584	3.80964	3.51881	3.77942
ADARB2	0.166534	2.07399	1.10164	1.19958	2.10862	1.05539	0.225945	0.748006	1.76191	1.89018	1.20977	2.85276	0.838212	1.49772	1.1202	0.951833	0.677537	1.84958	1.37628	0.713763	1.21982	1.1261	0.221297	0.929688	0.873436	1.36611	1.63559	1.64113	1.65598	1.69239	1.70506	1.7419	3.24098	1.68307	1.64618	1.93303	1.63891	1.65358	4.22192	1.66677	1.66397	1.65658	1.69735	1.80126	1.66744	1.80265	1.64392	1.6384	1.62652
ADAT1	4.72102	5.16046	5.19902	5.66568	5.37786	5.23725	4.45089	5.01425	4.44339	4.9003	5.16808	4.95624	5.32742	5.2095	5.19578	6.05329	5.14718	4.19477	5.16729	4.32728	4.84334	5.19075	5.36941	4.6254	5.20103	6.00453	4.76683	4.48552	5.28371	5.29185	4.80684	4.11907	5.58805	4.92978	3.20694	4.50046	4.30144	4.32362	4.26693	5.28685	4.61676	5.82908	5.73282	6.05519	5.26869	5.93107	5.1559	4.44506	5.5616
ADAT2	4.18291	4.32563	3.88109	4.6355	4.12372	3.62265	4.22911	4.4443	3.62546	2.34329	3.97561	2.2838	2.84454	2.96992	4.51278	4.00328	3.93399	2.2772	3.8633	3.78093	4.77838	3.61598	4.2122	3.00122	3.66051	4.0421	4.16732	4.70222	3.61847	2.86298	3.52926	3.70358	2.90461	3.90624	4.17891	4.28673	4.56507	3.10153	4.28391	3.7767	2.98288	3.59654	2.69022	3.39583	2.73992	3.18823	2.94974	3.21568	3.80457
ADAT3	3.40047	4.35112	4.02612	4.61103	3.13507	4.15921	1.5538	4.90814	2.92992	4.94683	3.12338	4.66228	1.56857	3.78687	3.52492	2.8749	4.47721	4.05777	3.5226	4.26091	2.57109	2.88121	3.09149	4.2714	3.96201	3.74239	4.98939	5.03901	4.87998	1.38504	3.62104	3.44918	1.32456	2.70846	4.75001	3.85411	1.94624	1.35628	4.12043	4.34181	4.62706	4.83048	1.4101	3.65466	3.54176	1.47581	4.99261	4.8531	5.13322
ADCK1	4.95369	5.6235	5.3074	5.21535	5.4068	5.65817	5.20599	5.41745	5.14253	5.37171	5.32083	5.41706	5.47461	5.73676	5.08999	5.812	5.0431	4.74417	5.12241	5.42008	5.21132	5.05727	5.06042	4.98732	5.48764	5.99443	5.32633	5.39606	5.49453	5.36366	5.12577	5.2478	5.06042	4.4272	3.33494	5.16729	5.36222	4.53041	4.52783	4.99504	5.63813	5.41301	5.42115	6.24042	5.51123	4.16914	5.92722	2.53481	5.70086
ADCK2	4.94396	5.10062	5.68158	5.52553	4.81241	4.49386	4.96602	5.20525	5.15101	4.83048	4.87075	5.44826	5.3074	5.36435	4.41634	5.86089	5.10797	5.10477	5.23566	4.97244	4.35854	4.62314	5.27188	5.50861	5.11758	4.61946	4.99901	5.08403	5.04694	5.3709	4.86277	5.10599	4.88648	4.33637	5.21697	4.3219	5.22467	5.01192	4.88179	4.7269	5.43554	4.96221	3.48325	4.3537	5.14043	5.23497	5.04621	5.30314	5.17033
ADCK5	5.66711	3.276	5.70638	1.97726	3.26	1.10514	3.78977	1.26671	3.19263	1.70506	3.44477	2.83616	3.13012	4.75333	4.11594	3.4564	2.05206	3.67785	3.61999	4.28834	3.75149	2.69213	1.88613	3.48235	4.62625	1.82171	3.39242	3.85276	4.09205	4.33815	0.578668	4.19955	0.502196	0.524415	4.57819	3.63648	3.34431	0.557574	0.526119	2.33643	4.22423	4.20331	4.51403	0.663459	4.10608	4.63085	3.15627	3.65369	3.55213
ADCY1	3.68351	2.65742	3.34365	1.4323	3.50178	3.35105	4.66761	3.17019	4.08178	3.63648	3.71135	1.45834	2.57109	2.53032	1.8461	2.97068	2.95691	4.49297	2.40807	3.60867	3.38446	4.67179	3.03572	3.34256	3.37538	3.49407	4.52949	2.25689	4.09102	3.94791	3.66837	4.2122	3.83864	1.17623	3.11609	4.45436	1.89761	3.15566	3.11609	3.41288	4.24606	3.08224	4.48376	3.72434	3.47031	4.14416	4.09475	4.03961	3.74294
ADCY10	2.02291	0.758325	2.78612	3.82579	3.07182	2.02291	2.95769	1.12067	3.0214	2.9063	0.745454	2.55533	3.52315	3.82471	2.02546	3.11685	1.54701	2.23592	3.11546	1.2712	2.55866	2.91121	3.43983	2.92619	3.88058	2.48548	2.4732	3.40325	3.12149	4.3118	4.03924	2.85751	3.28977	3.26827	3.23799	3.5728	2.51759	3.62667	3.39242	3.04412	2.15436	2.00086	2.84052	2.62152	3.3473	3.60006	2.18934	3.25329	1.48469
ADCY2	4.39176	2.66189	2.4732	3.60108	3.14444	2.07961	4.04867	3.40998	1.46661	2.70727	3.74849	3.86127	3.36135	4.27092	3.80664	3.74947	3.14613	2.80228	2.74086	4.04951	1.45719	3.87872	3.85319	3.9649	3.71541	3.08499	0.604746	3.30675	4.01526	2.73724	3.92831	4.33954	3.9439	4.283	3.66451	0.798876	3.11278	0.628927	3.04726	4.01441	0.605982	3.69954	3.6154	3.65413	4.39176	3.67842	3.79858	1.80548	3.72481
ADCY3	5.92538	4.9414	5.78551	5.37422	5.72223	5.41115	5.62039	5.1266	5.81134	4.61756	5.57166	5.56771	6.04874	5.15175	5.1841	5.03863	6.10835	5.63913	5.72852	5.67692	5.12507	5.70261	5.76791	5.24634	5.64641	5.57413	5.48613	5.62186	5.63452	5.78376	5.58613	6.67596	5.53898	5.77449	5.25283	7.16733	4.8531	5.4239	5.74922	5.76625	5.26792	4.97438	6.14777	5.33743	5.5569	5.70488	5.42481	5.28956	5.33319
ADCY4	6.25189	4.75608	6.41875	4.51131	4.10699	2.55785	6.04288	5.34728	4.91646	3.62605	5.70017	3.74094	5.9693	5.19479	6.9589	4.59526	3.53434	4.64824	4.81318	5.26485	6.82194	6.57345	4.52312	6.40265	6.45092	4.69105	2.55785	4.78742	3.66146	2.68203	5.83682	6.04951	5.8855	6.01198	3.18625	1.53804	5.90096	6.58408	5.61144	6.03287	5.90202	6.2588	6.62909	4.48471	5.86803	4.27747	6.28471	5.57311	6.61238
ADCY5	5.91262	6.13107	6.71076	5.95183	6.5991	5.88728	6.14596	5.75758	5.82872	5.38568	6.6406	5.99722	6.02914	5.27152	5.24248	5.51188	4.814	5.74232	4.92468	5.64883	6.09062	5.91194	4.74368	5.43707	5.99695	5.42419	6.03861	5.67846	6.54657	6.04511	6.00176	5.58765	6.12889	5.9496	6.50092	6.17477	5.70745	4.3576	5.90401	5.61405	5.81548	5.76001	6.00685	5.93037	6.16966	6.05963	5.21096	5.3488	5.74479
ADCY6	6.08238	7.53991	6.02379	6.27647	5.77986	6.22933	6.80279	6.93133	5.96862	6.53123	5.9511	6.25743	6.09703	6.2548	7.35908	7.0162	4.36092	6.65092	6.52009	7.32179	5.81797	6.18414	5.20876	6.58882	5.93282	6.2439	6.39366	6.18702	7.09792	6.90048	6.5607	6.20478	5.76451	5.89268	6.82969	7.03048	6.44588	3.45183	5.47427	6.38692	6.61124	6.92444	1.82333	4.00624	4.97929	5.58145	7.25068	4.12224	6.49565
ADCY7	4.32064	4.21261	3.11412	4.59383	4.93872	4.03124	4.55982	5.83015	4.02899	4.1991	4.05647	4.65866	4.39092	4.43882	4.15222	4.5046	7.19545	4.23711	4.84783	4.29085	3.81056	4.26091	4.46042	4.52196	4.0856	4.1101	5.18223	4.86646	4.99984	2.53032	3.52634	4.34232	4.85345	4.4471	5.0382	4.6228	5.09579	5.723	4.0421	5.34548	4.01164	4.79709	4.36143	2.93499	3.80203	3.70358	3.59131	4.62232	2.83367
ADCY8	0.906627	2.23727	3.38614	1.38657	2.93292	-0.0958701	0.826807	2.60975	3.16962	1.15903	2.10862	0.164216	1.21648	1.5189	0.693984	1.09664	1.33199	1.72602	0.921301	1.31355	1.58398	1.48381	0.972104	1.57835	1.24324	1.66008	2.89638	2.60752	3.72639	1.46844	1.49118	1.5189	1.40955	1.46172	3.08097	1.66342	1.42366	2.45789	1.451	1.45258	3.21134	4.57193	1.48627	1.57551	1.44827	1.56589	3.82325	2.08459	1.41066
ADCY9	6.23929	6.21949	7.26071	6.16368	6.46882	6.55285	6.95702	6.44634	6.56158	6.72705	6.64606	6.76256	6.79635	6.75902	6.46238	6.46124	6.28658	6.8721	6.39407	6.9981	6.90381	6.68265	5.8746	6.65773	6.80951	6.22308	6.56778	6.13906	6.93647	6.69587	7.11087	6.59636	6.97453	6.9589	6.5947	6.50709	6.14923	5.93906	6.85589	6.66884	6.6406	6.66959	6.34799	6.32133	6.53769	6.65429	6.53312	6.40028	6.56778
ADCYAP1	0.618956	1.42509	0.166534	0.845759	2.13816	0.91738	0.955334	1.6896	1.20266	1.08113	1.48001	1.15026	0.6506	1.00885	0.455223	1.20913	0.195824	0.128661	0.766886	0.187338	2.34212	1.11842	1.21814	0.890831	1.21082	1.23628	1.5331	1.5281	1.54992	1.58519	1.6032	1.63329	1.52146	1.58073	1.53559	1.78659	1.5331	1.54642	1.56532	1.56748	1.55315	1.55159	1.59963	1.69025	1.56411	1.68898	1.53559	1.5281	1.5231
ADCYAP1R1	4.56589	3.5037	3.82471	3.59447	4.87636	4.90137	4.1101	3.54288	4.86484	4.47966	5.29148	4.37421	4.31886	3.96632	4.07941	4.37333	3.95404	4.38542	4.21964	4.23129	5.30049	4.39226	3.78093	4.0856	5.09981	4.9629	3.64487	3.85027	4.29476	4.45173	4.9839	5.26869	4.7859	4.8927	4.77683	4.84613	3.89333	4.08923	5.56064	5.12975	4.7859	4.16245	4.64946	4.44067	4.70978	4.64292	4.71425	5.07915	4.22511
ADD1	8.05933	8.04369	7.8153	8.00631	7.93737	8.10051	7.87583	7.96434	7.75075	8.08684	7.91582	7.94152	7.94284	7.93232	7.84161	7.66001	8.2172	7.87935	7.73844	7.79602	7.59156	7.85357	7.43595	8.21162	7.98251	7.61432	7.9496	7.67315	7.7669	7.72421	7.97623	7.8557	7.86575	7.72421	7.63493	8.05413	7.44055	7.61019	7.83201	7.7973	7.79793	7.94523	7.82562	8.00386	7.50726	7.75209	7.78412	7.5368	7.727
ADD2	3.81346	3.21307	4.40082	3.74947	3.22063	3.85502	4.09299	3.94612	4.19135	3.99806	3.84305	4.34279	4.53949	4.25109	3.85987	3.818	3.58773	3.85753	4.50996	4.10837	4.74647	3.65951	4.1887	4.00328	4.02612	3.99765	4.44545	3.90419	3.42846	4.27656	3.81843	4.30366	3.43883	4.16286	3.71977	3.68777	3.73895	4.4272	4.14509	4.24565	3.54449	3.28862	4.12808	5.19407	3.85753	4.0421	4.15697	3.96678	3.49963
ADD3	9.24675	9.15271	9.04815	8.96928	9.30827	9.18655	9.11111	9.03189	9.05555	9.19972	9.03189	9.10401	9.02827	8.9237	9.04274	8.78542	9.03745	8.85554	8.57571	9.0536	9.2924	9.49615	8.40936	8.86896	8.99139	8.89024	8.71511	8.97267	9.12396	9.20384	9.43865	8.82853	9.2185	9.11111	9.05004	9.08237	8.90739	8.87764	9.45995	9.24675	8.8842	8.8391	8.71511	8.82994	8.83611	9.04815	8.67638	8.75173	8.66348
ADH1A	3.78735	4.8381	4.3445	3.59706	4.82	4.15647	5.10214	4.06232	4.17267	4.76288	1.21593	4.35466	4.40082	4.97744	3.79078	3.41966	5.6625	4.65866	4.15697	2.94308	3.11012	4.48142	3.49911	3.75244	2.91036	5.6032	4.15168	3.57004	4.80814	4.17846	4.53824	5.48136	4.6449	3.08704	5.12427	4.77683	3.92405	3.95169	4.66485	3.84001	3.73049	3.62104	3.51233	3.64261	4.66228	4.47368	4.3244	5.38288	4.35813
ADH1B	8.17326	7.6782	5.95768	6.28164	8.18356	7.7755	6.51623	7.14256	7.78617	7.76144	7.5528	6.82485	7.32446	7.79189	6.97328	5.93179	9.47035	7.53121	7.62189	6.09097	6.56552	7.38165	6.48644	7.13898	6.32394	8.78078	7.50254	6.61471	7.31034	8.13396	7.48137	8.15583	7.80957	7.84997	8.07318	7.23908	7.09792	7.24076	8.04036	7.32446	7.55623	7.02907	6.70696	6.78181	7.76819	6.7749	7.63187	8.31187	7.63945
ADH1C	4.71675	1.26461	3.92126	4.12186	4.97929	4.87075	4.34877	1.45719	4.98546	4.40174	4.72496	4.74018	6.70613	6.05477	4.11339	2.92064	7.78412	5.21622	4.63594	3.16199	3.77475	4.53528	2.93786	4.50804	2.50109	6.93821	6.15617	4.83607	4.70402	4.95743	4.41765	5.97769	2.80745	0.260527	5.29069	4.70624	4.1027	5.17881	5.29889	4.2835	5.39573	4.7377	3.82766	4.16914	5.10513	5.16697	4.43752	6.5603	5.09791
ADH4	3.71356	3.76549	1.69909	3.40656	3.63648	2.21169	3.38157	3.36368	3.93347	3.31409	3.08956	3.17019	3.54288	1.90526	1.72044	3.48697	3.11875	3.75046	3.04255	3.83734	2.83456	3.30073	3.72023	2.38036	2.52814	3.07312	2.79959	3.64487	3.23274	2.78365	3.75597	3.64824	1.88936	2.98151	2.98945	3.35154	2.96114	3.23979	2.30621	2.62998	3.12078	2.9401	3.20764	3.34608	3.79647	2.76568	2.9669	3.04936	2.64184
ADH5	9.45265	9.47525	9.72174	9.37161	9.75327	9.49345	9.70288	9.37615	9.78825	9.38268	9.78509	9.70933	9.43155	9.35465	8.94467	9.64169	8.6989	9.54229	8.89511	9.59102	9.61515	9.57794	9.55815	9.57794	9.52618	9.38268	9.26404	9.53709	9.78825	9.87338	9.54229	9.40258	9.5086	9.42208	9.57591	9.31285	9.76528	9.37615	9.54803	9.55518	9.62286	9.0965	9.25974	9.06762	9.44989	9.37834	9.08426	9.47035	9.14874
ADH6	1.60619	0.7342	1.62652	1.69076	0.749709	1.61487	1.01649	1.11076	1.54642	2.32516	-0.130684	1.72602	1.83356	1.5082	0.178692	1.02887	0.234792	0.842761	0.773523	1.4257	1.17722	0.951833	0.99938	0.0892679	0.528013	1.09065	1.38822	1.37076	1.39751	1.42954	1.45258	1.47856	1.37031	1.42366	1.38273	1.62237	1.38414	1.39911	1.41667	1.41765	1.4012	1.40559	1.44784	5.54039	1.41066	1.5209	1.38993	1.3758	1.37285
ADH7	3.618	3.04482	4.93301	1.86199	4.41634	4.55806	4.35466	1.71719	1.34185	4.17936	4.66613	1.30639	3.7173	2.1231	1.36196	3.8223	3.64385	2.45662	3.43397	3.63419	5.07376	3.14194	2.4732	2.81945	3.03337	3.21813	0.961802	3.52591	4.77876	3.89794	2.08706	3.4564	4.12322	4.21533	3.02275	4.05596	4.17224	2.44142	2.14936	3.28801	2.87129	-0.469252	2.72715	4.22511	4.04124	3.14444	3.39583	3.57222	3.67294
ADHFE1	7.72764	8.29891	8.64295	8.37164	8.17995	8.11177	8.30941	8.06093	7.90446	7.84997	8.18869	7.8203	7.29283	7.47799	8.7557	7.7029	7.26457	7.93466	6.86975	7.03946	8.254	8.04997	7.81669	7.86313	8.28689	8.17688	8.04688	7.48513	8.04688	7.75414	7.84588	8.35709	7.62876	7.91355	8.43566	7.27992	7.69862	7.18125	7.24586	7.60581	8.31801	8.73384	7.62072	8.21825	8.65351	7.89944	8.34927	8.51223	7.94676
ADI1	9.04083	9.06608	9.63868	9.34354	9.63868	9.1741	9.22672	9.27325	9.80657	9.60985	9.81845	9.67134	9.9672	9.82179	9.01974	9.99101	9.28211	9.37834	9.45995	8.95677	9.54504	9.12753	9.83441	9.06304	9.76241	9.68798	9.41935	9.73816	9.70933	9.24878	9.69961	9.55815	9.06945	9.35465	9.49345	9.65854	8.93654	9.22238	9.21671	9.57591	9.81845	9.33634	9.63097	9.43865	9.47278	9.79457	9.31711	9.23127	8.87173
ADIG	0.923887	4.80536	0.609989	3.73426	0.910741	3.3619	1.44333	4.00237	0.568939	4.18201	1.08052	2.68518	0.545783	4.06187	2.35209	0.736804	1.13636	1.20328	2.77734	3.0936	4.65044	1.12405	0.652592	2.08354	3.14741	1.50924	2.16178	1.04343	4.72453	1.10625	1.13124	1.15142	1.05352	1.10959	1.05956	1.28822	2.58654	6.07538	1.09664	1.0957	4.75368	1.09115	5.57908	1.20734	1.10009	1.20581	1.05956	4.46625	1.06417
ADIPOQ	10.8088	5.97558	3.26451	7.65599	5.37713	7.17065	6.36965	6.43634	9.79457	8.52298	9.50622	7.35055	4.04682	6.70904	8.59341	5.30984	5.08729	6.89919	5.46607	6.56699	5.59094	5.51522	5.74798	5.46916	5.38502	12.089	7.57449	6.43247	5.52226	6.67227	6.52009	7.38597	6.09168	5.98669	5.95407	5.71323	6.32784	6.12395	8.12397	6.29052	6.66684	5.26869	5.12464	6.11646	5.42796	6.11646	6.52157	9.22481	6.44879
ADIPOR1	7.36534	8.22289	7.50025	8.68576	7.75495	8.1844	7.76084	8.3406	7.75891	8.52546	7.62072	8.46487	7.8153	8.14712	7.78964	8.43087	8.2613	7.47241	8.13486	7.35393	7.23808	7.48197	7.91434	7.35113	8.01277	8.20174	8.00003	7.99219	7.88002	8.23044	7.33919	8.23315	7.65869	7.77839	8.32596	7.48381	8.33776	7.98891	7.74939	7.83346	8.15674	7.80755	7.77156	8.05246	8.29141	8.24744	8.21351	8.41687	8.50087
ADIPOR2	8.6062	8.31109	8.36765	8.14892	8.61279	8.2362	8.55229	8.20105	8.3406	8.10607	8.63266	8.08454	8.63776	8.02472	7.81099	7.92394	8.04092	8.47502	8.12884	8.22566	8.23221	8.65351	8.40493	8.01127	8.254	8.52909	8.10794	7.95887	8.62807	8.22566	7.92543	8.42651	7.80076	8.43752	8.42886	8.15234	8.13322	7.95555	7.95028	7.77082	8.2971	8.17995	8.31399	8.27075	8.27524	8.14972	8.26798	8.04919	8.45297
ADK	7.2448	7.30082	7.60215	7.0564	7.45344	7.11671	7.5622	7.02566	7.52181	7.46057	7.74063	7.45644	7.68609	7.34198	7.20144	7.72488	7.10083	7.2346	7.54109	7.00893	7.60961	7.52677	7.97541	7.68485	7.94362	7.97863	7.79537	7.84926	7.65869	7.76144	7.37503	7.53859	7.59409	7.80542	7.65025	7.33919	7.6053	7.75414	7.38831	7.18955	7.5031	7.50671	7.7568	8.23122	7.83554	7.9121	7.16911	8.07092	7.47028
ADM	7.8375	8.10607	8.43218	8.22753	7.8068	8.00462	8.09628	7.53349	8.47801	7.86372	8.07484	8.62189	8.89318	8.94836	8.17688	8.50452	7.95028	9.1645	8.14174	8.95344	7.96739	7.76411	6.94629	9.04655	7.86493	7.82562	7.57066	8.03879	8.69506	8.56865	9.10199	8.25058	9.02454	8.00966	7.47921	7.6979	7.0405	7.91742	8.42651	9.12753	7.85505	7.3169	7.77082	7.41029	6.92956	8.65351	8.42986	8.12884	7.28147
ADM2	5.80759	2.90323	5.09579	4.8927	1.55802	1.38993	4.26008	2.62998	4.20044	5.92167	4.35511	4.32806	5.77107	1.52552	3.96156	3.64768	3.26635	4.31968	3.84105	5.5828	4.61946	3.55443	3.80353	4.60539	4.15031	3.52804	5.37537	4.8288	4.99938	1.18352	5.24996	1.23427	4.82563	4.16502	5.17191	1.3654	4.93747	4.41591	3.67528	5.35176	1.17006	4.73885	4.77016	5.60353	5.36725	1.28502	4.65467	4.11907	3.71039
ADNP	7.53519	7.54554	7.10224	7.27729	7.12611	7.23857	7.01532	7.35113	7.23754	7.51293	7.34198	7.28647	7.0128	6.95847	7.74121	7.25861	7.16335	7.26624	6.98751	7.31093	7.33592	7.2982	7.2618	6.83998	7.14517	7.01329	7.18955	7.0576	6.9986	7.18755	7.34847	6.86323	7.45999	7.19596	7.07491	7.10315	7.07742	6.92996	7.39445	7.32393	6.92577	7.03717	6.67518	6.80917	7.0704	6.9143	7.04287	6.91154	7.13898
ADNP2	6.68003	6.46761	6.43533	6.46711	6.05709	6.42301	6.6059	6.36006	6.45453	6.38579	6.29343	6.08095	6.37831	6.28769	5.94818	6.80193	6.05477	6.17371	6.0306	5.69761	5.91442	6.06476	6.34299	5.81691	6.20665	6.43084	6.36116	6.422	6.73039	6.52009	6.73494	6.21575	6.44174	6.08126	6.30984	5.93792	6.17303	5.95694	6.22029	6.45501	6.12139	5.62844	5.9424	5.84126	5.8962	6.09808	5.85848	5.94379	6.33269
ADO	7.91742	8.06251	8.20703	7.88237	8.42422	8.07997	7.88686	7.60003	8.12979	8.34489	7.93027	7.81169	8.07577	7.8923	7.32446	7.8375	8.03217	8.00386	7.93232	7.96497	7.82176	8.09103	7.95639	8.01972	8.08518	7.69063	7.72971	8.20253	8.21825	8.02654	8.29599	7.8594	8.209	7.91051	7.67044	8.05068	8.12159	7.6979	7.87583	8.11928	7.93027	7.51711	7.62821	7.82843	7.90098	7.66206	7.72971	7.57201	7.5782
ADORA1	4.64408	4.86522	4.02762	4.67845	5.24114	5.51558	4.82487	4.76976	4.55271	4.86522	4.65164	5.59374	4.7953	4.95584	4.4759	4.90494	4.29276	4.88044	4.84048	6.08988	4.86277	5.08964	4.72608	4.9144	4.96085	4.78936	4.40174	5.13322	5.1536	4.95829	4.6972	4.12851	4.07433	4.62792	5.26148	4.0227	4.38709	4.65595	4.41041	4.4677	4.68166	4.71093	4.44545	4.53203	4.81202	4.0107	5.17467	4.64065	4.30962
ADORA2B	3.71492	3.68998	3.48697	4.00971	3.58516	3.41676	4.24694	4.49462	2.80889	1.88787	2.87896	3.07182	4.46625	4.66613	2.50814	3.01123	2.57726	3.68404	3.47716	5.09828	3.29242	3.618	3.37703	3.59447	4.05819	1.86557	1.31142	4.39092	1.32106	3.97155	4.29318	4.91807	3.59447	3.74441	2.7437	5.01348	3.02348	4.42491	4.32936	3.45592	3.21931	2.227	1.37789	1.46443	3.02996	5.04265	1.3077	2.87968	3.28016
ADPGK	5.57344	5.88996	5.62611	5.18265	5.75858	5.65063	6.05063	5.53423	5.62004	5.56349	5.61726	5.11714	5.75718	5.32814	5.75675	5.72049	6.62742	5.54955	5.47062	5.37052	5.49377	5.72125	5.16313	5.57413	5.37132	5.70413	5.85489	5.66602	5.8724	5.85143	5.34698	5.78628	5.45353	5.3021	5.46162	5.95152	5.91543	6.3811	5.64679	5.62499	6.03574	5.594	5.62315	5.48441	6.06136	5.65625	5.72596	5.99583	5.41631
ADPRH	4.25694	5.03532	5.14594	4.61024	4.66652	5.25104	5.25704	4.97893	5.08999	5.6478	5.22708	5.42895	4.84334	5.3521	4.57518	4.65552	5.08999	4.68122	4.97966	4.8345	5.13755	4.64167	5.0042	4.58203	4.78131	5.34945	4.95121	5.30805	4.39176	4.64539	5.22425	5.66568	5.27637	4.73885	4.48471	5.09313	5.18189	4.51785	5.22545	5.24558	4.75164	4.21397	4.61432	4.75164	4.70017	5.02102	5.15515	5.36621	4.64247
ADPRHL1	8.26235	9.24878	8.95344	9.06105	8.66996	9.42667	8.73508	9.35245	8.70458	9.11111	8.87173	9.08923	8.43218	9.37373	8.75173	8.80535	7.61191	8.85264	8.07015	9.06608	9.11469	9.16639	8.6989	9.35019	8.98656	8.72703	8.9331	9.11469	8.34292	8.8039	8.48337	8.56653	8.47284	9.28211	8.72562	8.72562	8.54894	8.58266	7.93669	7.77693	8.95176	8.94644	9.15426	9.34581	9.27098	8.9896	9.15641	9.31494	9.13713
ADPRHL2	7.05804	7.38763	7.67315	6.79841	7.17844	7.07226	7.32123	7.1731	7.08382	7.26023	6.72154	6.75241	7.14053	6.96541	7.31469	6.92919	7.1282	7.0128	7.1823	7.53796	8.06677	6.82522	6.67435	6.90177	6.59257	6.50519	6.7284	7.05883	6.70951	6.95248	6.11183	6.95113	6.61572	6.71791	6.40303	6.96931	6.83235	6.86934	6.26856	6.23235	7.53402	7.32605	7.55104	7.13472	7.49773	6.84421	7.30656	7.22501	7.1844
ADRA1A	4.8873	5.0406	5.0447	4.54077	6.03574	5.48683	5.61112	5.08034	5.04694	4.56548	5.64565	5.34054	5.23135	5.02961	4.63129	5.37681	5.26254	5.2095	5.17881	4.89764	6.02416	5.51091	5.19693	4.97503	5.48474	5.03279	5.62288	5.29069	5.78491	5.61831	6.22824	4.96937	5.80203	6.13864	4.9144	5.45599	5.91986	4.88218	5.93146	5.36366	5.21465	5.43144	5.25631	4.5391	4.91362	4.2552	4.75164	4.86571	4.83607
ADRA1B	1.51138	2.29191	1.60081	5.71214	0.59327	1.20474	1.18396	1.85681	5.15248	3.08829	1.10115	0.814882	3.00986	1.22189	2.73419	2.49136	1.66622	1.53861	1.50479	1.07436	3.40325	1.90443	2.91036	0.893634	4.25377	1.61024	1.34079	0.675248	3.1394	5.53463	0.743737	5.83047	0.693984	3.59748	4.59257	4.69802	2.62881	0.725121	0.728691	0.727748	5.07654	0.728691	0.787871	2.54034	4.85933	5.37644	2.89481	2.87352	3.9995
ADRA1D	1.66503	0.189716	2.36534	3.14001	3.02208	0.815696	0.125553	3.00917	1.64849	1.9183	1.88527	2.85663	0.158611	0.9259	1.0957	1.17073	1.56857	1.43106	1.50097	1.75049	2.74258	1.50419	2.53936	1.41066	3.06708	0.899145	2.09249	1.46661	1.49013	1.52762	1.54701	1.57601	1.46294	1.51842	2.98808	3.07381	1.47856	1.48952	2.73724	1.51417	1.49449	1.49715	3.5068	4.69802	4.33228	3.79746	2.99637	1.47633	2.92392
ADRA2A	3.84789	3.5156	1.93019	3.31642	1.15693	3.49695	3.90282	4.24966	1.09295	0.555918	0.690878	2.46579	3.1279	3.9995	2.18112	1.35465	3.03061	3.23531	2.87813	3.86936	0.863176	3.16962	2.73323	3.78583	3.48988	4.08373	3.8924	3.55545	0.85333	0.866465	3.11546	3.35056	3.4329	0.890831	0.836841	2.56692	3.55979	4.18166	5.08292	3.95642	4.74368	3.89938	2.13962	3.95127	3.2164	4.11057	2.92917	3.18199	4.85684
ADRA2B	1.73615	5.43041	0.769385	4.0378	0.238296	5.44222	1.82408	1.23209	4.51828	3.08956	3.31018	1.42366	1.10625	1.34596	2.53936	0.914783	1.33141	2.12031	1.5351	3.39983	4.45132	3.28915	2.59863	3.94654	1.52762	3.33301	4.39653	5.1464	1.08052	4.78628	4.91561	4.81318	1.06239	1.1202	1.65186	3.57058	3.92591	4.62314	2.54577	1.10464	1.09889	2.21022	1.15079	1.21917	3.66543	3.32282	3.31462	3.26827	1.07554
ADRA2C	4.3992	5.93419	5.76001	6.1247	4.89	5.83951	5.46995	5.65412	5.32742	5.78865	4.86277	6.09133	4.96085	6.07577	6.62394	4.64338	5.45792	5.74198	6.0784	5.4926	6.15872	5.79823	5.05499	5.50562	5.79119	5.75926	5.87552	5.92085	5.04181	5.44401	5.5777	5.68766	5.27602	5.83047	5.22966	6.2331	5.88892	6.04108	4.1859	5.96059	5.99226	5.51732	5.53391	5.78096	5.40571	5.48179	5.5957	5.52882	5.70745
ADRB1	6.82312	7.22924	7.29283	6.99566	7.41646	7.67178	7.88237	7.81906	6.72412	6.97023	6.9348	6.87645	6.8127	7.25861	7.42567	7.07085	6.15539	7.66402	7.93737	7.92469	7.7762	7.64268	6.88245	8.46934	7.29765	7.42567	8.00462	7.71456	7.32347	8.23903	8.35416	7.42631	8.13077	7.39964	8.08607	7.57876	7.64956	7.52542	8.16937	7.81023	8.04919	7.21422	7.19746	6.98665	7.30656	7.2319	8.00966	7.60581	6.53479
ADRB2	5.91887	6.16174	6.17477	5.9654	6.39481	6.92528	6.62431	6.60547	6.54822	6.1247	6.71157	6.53479	6.92483	6.48682	7.20746	6.44133	5.92999	6.93742	6.56352	6.11335	6.67637	6.58517	6.51928	7.27566	6.55692	6.65262	6.62909	6.77182	6.56393	6.87114	6.9981	6.63974	6.5335	6.76723	6.78518	6.76723	6.51851	6.49311	6.48011	6.25297	7.07226	5.95489	7.00356	6.08505	6.48095	6.45851	6.41196	6.7676	5.72188
ADRB3	3.84834	1.69239	2.04371	0.99938	0.88654	0.657924	0.987897	2.18388	0.835975	0.154631	-0.047219	1.10681	1.46558	0.720993	0.848866	0.207949	1.76632	1.70085	0.587293	1.79993	1.17006	1.1805	0.689807	0.564963	0.0789757	0.270561	1.22864	1.20366	3.977	1.26513	3.67036	1.31306	3.64487	1.25823	1.21593	1.44475	1.22132	1.23628	3.07448	1.25672	1.24324	1.41254	1.2856	1.37901	1.25672	1.36485	4.25432	1.20913	1.35193
ADRM1	6.60766	7.10407	6.60274	6.90621	7.02366	6.77047	6.67549	6.66959	6.98484	6.08883	6.7275	7.10356	7.03515	7.2437	7.23857	6.55013	6.43407	6.53857	7.1649	6.94446	7.19266	6.75991	6.23455	6.85014	6.8127	6.81398	6.96388	6.99722	6.38891	6.55859	6.50912	6.31593	6.58996	7.19904	6.65986	7.08382	6.92996	6.842	6.52643	6.46451	6.5532	7.33428	7.68079	7.85225	7.09405	7.51168	7.1731	7.3703	7.34198
ADSL	8.63162	8.57814	8.67638	8.16169	8.6062	8.52019	8.49656	8.36507	8.51672	8.07484	8.48916	8.37337	8.54437	8.30857	8.07577	8.74795	8.15391	8.35917	8.49779	8.11693	8.3439	8.74914	8.69214	8.69506	8.4335	8.65599	8.50653	8.31801	8.04175	8.34489	8.13322	8.29041	8.363	8.60512	8.31692	8.25058	8.488	8.60889	8.15583	8.03375	8.26053	8.62558	8.83154	8.86143	8.63162	8.59979	8.44739	8.59726	8.38963
ADSS	4.66689	3.99765	4.72648	5.18303	4.46089	5.32393	4.36661	5.02657	5.00145	4.68004	4.69846	4.96001	4.78936	4.64904	4.96781	5.05166	5.35176	4.79066	4.64022	4.63169	4.65129	5.05393	5.02466	4.80266	4.05647	4.72535	4.66187	4.8381	5.23171	4.69519	4.53475	4.87476	4.77306	4.66228	4.59911	4.731	4.36007	4.60159	5.02508	5.25631	4.54255	4.47771	4.34877	3.94943	4.77683	4.64863	5.10439	5.02013	4.91362
ADSSL1	8.23809	8.86595	8.18269	8.27805	8.73626	8.87627	8.72966	8.76409	8.40936	8.8039	8.87494	9.12753	8.64427	9.12054	8.53033	8.45549	8.08914	8.78217	8.96414	8.7128	8.85264	8.64051	7.77013	8.91734	8.85408	8.92532	8.4801	8.7571	8.38963	8.28013	8.93808	8.88868	9.03897	8.82571	8.49329	8.8452	8.21351	8.41034	8.75173	8.57099	8.8857	8.61416	8.48688	8.79381	8.55568	9.08741	8.70856	8.70181	8.40493
AEBP1	8.8857	6.82155	4.2552	6.82569	4.30226	4.86066	3.22987	5.27267	5.49091	6.43164	4.45778	7.70354	6.34372	6.1157	7.6979	6.05361	5.48764	6.66027	4.69105	7.44517	2.82357	5.19654	4.907	5.13932	6.21985	4.32642	5.46269	1.32817	5.66848	4.82563	3.9711	6.03893	4.70896	4.12372	2.61293	5.61405	5.41115	5.0042	5.05621	6.60457	5.57127	5.2278	4.92305	6.15337	2.84531	5.0382	5.14804	1.33378	7.72764
AEBP2	7.03374	6.87946	7.2982	6.54619	6.94128	6.77315	6.96636	6.74421	7.05232	6.77315	7.1337	7.1594	6.86365	6.74713	7.55861	6.608	6.4104	7.1731	6.6581	7.24632	7.53349	7.21839	6.74042	7.01435	6.84548	6.73827	7.03667	7.28647	7.25274	7.33374	7.44291	6.82697	7.19939	7.10224	6.83652	6.47971	7.14801	7.12017	7.25274	7.41029	6.64752	6.68941	5.94712	6.34134	6.80097	6.54061	6.488	6.63974	6.78664
AEN	4.94726	5.2285	5.33847	4.27707	4.718	5.10835	3.45292	3.58257	4.21397	4.53343	4.37066	2.61773	4.02051	4.54515	4.56108	4.68852	4.24871	4.713	4.06777	4.55769	5.03445	4.5109	4.74487	4.49211	3.7041	4.76368	1.84115	3.84001	3.65161	4.42759	3.65768	5.25253	3.55934	4.68985	4.40808	4.69026	3.98685	4.81241	3.37596	4.08965	4.533	4.91982	4.01615	3.4585	3.24537	3.68874	4.25258	4.28713	4.92809
AES	7.11584	7.93737	7.20434	7.98967	7.83621	8.24744	7.62254	8.2971	7.07943	7.63364	7.63493	8.34676	8.0928	8.65934	8.10607	7.42408	7.17741	7.91051	7.76612	8.15146	8.3503	7.9496	7.23607	8.53129	7.66869	7.27476	7.52542	7.95807	6.42301	6.92444	6.41113	7.31589	7.74581	8.12884	7.70029	7.76884	7.87935	7.94598	7.1282	6.38212	7.65478	8.11928	8.54552	7.64126	7.70221	7.66402	7.37615	8.33188	8.28309
AFAP1	4.17179	4.37857	4.12851	4.51581	3.97999	3.82132	3.91326	4.0421	4.13627	3.93163	3.60748	3.80566	4.0285	3.68139	4.35423	3.88153	4.46808	4.39614	4.37033	3.47716	3.03262	4.3219	4.28007	3.53875	4.29398	4.58527	3.94119	3.55886	3.55336	3.18951	3.69253	4.33815	4.19648	3.84834	3.88343	3.77385	4.24565	3.8633	3.51932	4.14603	3.81294	4.28713	3.36977	4.02444	3.39418	4.25694	3.95781	3.66104	4.54608
AFAP1-AS1	1.64493	1.57267	0.989307	2.13816	1.37237	2.65149	-0.35903	1.67092	1.6879	2.96763	1.67556	1.02662	0.722755	1.09717	1.48682	1.52501	1.44686	0.669999	0.895628	1.09295	1.19842	3.12078	3.02642	1.868	0.052835	0.159331	1.38774	2.45039	1.39694	2.25335	1.45209	2.51643	3.33075	2.43923	1.3822	1.62182	1.38363	1.39849	2.13078	2.07961	2.03919	1.65027	1.44729	3.94436	1.4101	1.52044	1.38933	1.85288	1.37237
AFAP1L1	6.84598	7.17172	7.28054	6.9125	6.85497	6.78616	6.84166	6.68428	6.85939	6.78258	6.96114	6.67715	6.01892	6.38295	7.26567	6.5607	5.8578	6.19359	6.20913	6.61238	6.95161	6.68078	6.79365	6.91482	7.07403	6.54469	6.63822	6.10377	6.22349	6.05519	6.34624	6.43407	6.78914	6.75201	6.47971	6.67637	6.41837	6.64365	6.40769	6.42088	6.659	6.88161	6.73161	6.55732	6.87473	6.47734	6.69671	6.97453	6.80024
AFAP1L2	3.61179	3.07381	4.22107	3.95215	4.57401	4.59526	4.65633	4.08415	4.2849	4.52353	3.39183	4.55362	4.39485	3.97792	5.28178	4.0434	4.66652	3.15176	3.74595	4.24731	4.00376	3.748	4.4012	4.20331	4.02527	4.49585	3.7767	3.22437	2.92465	4.16102	4.00376	4.59752	4.34597	4.68592	2.95069	4.40039	4.25432	4.23088	4.4596	4.65983	3.69301	3.29966	4.28834	2.92064	3.31704	4.89398	2.78253	4.21748	4.0295
AFF1	7.51711	7.02907	7.28851	6.9472	7.38106	7.07179	7.51893	7.14469	7.20394	7.22551	7.42185	7.33868	7.20944	7.22924	7.42133	7.10178	6.73006	7.23135	7.42631	7.10684	6.68265	7.15572	6.68003	7.02123	6.71704	7.11389	7.11174	7.01714	7.04425	6.76524	7.79602	6.95847	7.40317	7.27215	7.16185	7.23306	6.66238	6.60149	7.43101	7.42913	7.06901	7.19266	6.49113	6.71201	7.0915	7.21208	6.80193	6.89442	6.78616
AFF2	2.99855	4.13759	3.85276	2.94837	2.99712	4.1305	2.12964	3.44214	2.91841	3.63812	2.53726	1.78911	3.13147	3.748	3.87039	3.37596	2.99566	3.14741	3.49695	3.55487	4.07645	3.44046	3.29587	2.52671	3.276	3.82471	2.66294	3.70897	1.96325	2.81945	3.10673	2.07961	3.33252	3.9373	0.571612	3.27405	3.17721	3.22437	2.13314	4.0107	3.16326	3.65868	3.25683	3.06498	3.38276	2.44054	3.73895	3.54398	3.43676
AFF3	3.57651	1.45358	2.73894	1.50765	3.3879	2.12572	1.76312	1.33319	3.20629	2.58045	4.08505	3.35006	4.27001	3.05011	1.32507	1.65416	1.64849	0.744605	0.240035	2.87196	2.94459	3.38614	3.68549	3.19456	2.87968	2.6533	3.69208	3.66543	2.46017	1.59672	1.61422	1.64392	1.53465	1.59194	1.54992	1.79993	1.54365	1.55741	1.57661	1.58012	2.43704	4.14068	2.52814	1.70145	1.57601	1.70145	1.54941	1.54079	1.53367
AFF4	5.9409	5.86659	5.43892	5.62808	5.53789	5.36588	5.83157	5.49926	5.61013	5.89929	5.67288	5.47165	5.80614	5.26634	6.21019	5.54883	5.21697	5.81962	5.66175	6.06657	5.82708	5.61217	5.7589	5.74126	5.36798	5.61144	5.64641	6.01342	5.98274	5.59264	5.78197	5.58209	5.6187	5.62734	5.79853	5.71907	5.46723	4.84096	5.33561	5.54844	5.40085	5.73461	4.60285	5.33811	5.21913	5.29889	5.18962	5.17191	5.35913
AFG3L1P	3.67294	3.13645	1.58122	3.60926	2.72436	2.55105	3.27666	4.16332	3.83217	4.09005	2.17988	2.25199	3.50971	2.88291	4.54515	1.87387	3.04255	3.48541	1.85759	2.89776	3.33134	3.49312	2.52671	3.00986	2.52214	2.66493	3.07448	2.5143	4.11465	1.49989	1.52202	2.50217	3.34489	1.49118	3.00259	3.30959	1.4504	1.46443	1.47958	1.48269	2.44781	4.82604	1.51474	1.60678	2.09825	1.59614	4.08607	1.44632	3.34489
AFG3L2	9.29481	9.22481	9.80339	8.92212	9.56598	9.32808	9.75609	9.19749	9.33634	8.81566	9.64393	9.16639	9.22238	9.14108	8.93956	9.13919	8.50771	9.28414	9.52618	9.03897	9.54229	9.38507	9.24878	9.59873	9.26404	9.23368	9.14495	9.22901	9.35465	9.55518	9.5734	9.13919	9.2971	9.32142	9.37373	9.06762	9.01808	8.97267	9.30143	9.3389	9.25088	9.22032	9.10063	9.04083	9.0803	8.89166	9.13713	9.15271	8.92685
AFM	3.02934	3.61895	2.17118	0.882779	3.92263	1.61079	3.0553	1.6373	2.44781	2.30782	3.80154	3.5776	3.20256	2.83456	1.50208	1.67092	2.53726	1.78849	1.38273	1.34185	1.7754	2.95613	1.76435	3.19697	1.52363	2.27586	0.737765	3.68604	0.736804	3.10347	2.75995	2.41163	2.65857	4.05415	0.711878	3.64115	0.733118	3.66203	4.24335	4.39092	0.756787	0.766071	4.10921	0.873436	2.42581	3.39583	3.66793	4.27481	4.27001
AFMID	1.81734	4.55318	1.78243	4.36052	1.61606	2.74181	1.06927	4.62314	0.816539	4.79709	1.33911	1.8368	2.80316	1.6772	1.98494	2.59212	2.69117	3.40047	2.50341	1.77145	2.32516	3.40325	3.02275	3.03188	1.08663	3.52634	4.18331	0.644726	2.6359	0.669999	2.98945	0.721846	0.664404	3.12078	0.635229	3.49205	3.66302	3.34777	4.31574	3.92263	2.47906	1.5664	0.748006	3.84834	2.92064	3.14314	3.77429	2.5825	0.668768
AFP	0.739442	0.94923	0.940952	1.31247	2.27024	1.34017	4.19043	0.112935	2.06574	3.13882	4.22649	1.04659	2.21689	0.374773	1.44127	3.79333	2.55219	2.09974	1.86033	1.60974	1.09347	2.81152	3.12574	1.29169	1.32251	2.08054	1.79177	2.62998	2.88635	0.526119	4.29966	4.58693	3.34831	3.4981	2.69315	2.81152	1.04948	3.40544	2.76899	3.79131	0.53638	3.07312	3.10474	0.661045	1.68734	0.665298	2.59306	0.499338	1.78301
AFTPH	6.58958	6.37951	6.94175	6.08613	6.81141	6.3229	6.68816	6.64295	6.99102	6.4198	6.86489	6.69714	6.89488	6.36533	6.93396	6.60187	7.11809	6.46326	6.74138	6.69455	6.66321	6.80325	6.48682	6.48761	6.34924	6.94629	6.48644	6.28658	6.42267	6.51468	6.86657	6.54061	6.58448	6.67956	6.7993	6.57969	6.52479	6.42447	6.67002	6.61471	6.39675	6.64925	6.54934	6.47929	6.5155	6.82035	6.56393	6.48682	6.47366
AGA	5.88115	6.0784	5.56315	5.56908	6.31903	6.06549	5.91507	5.6625	5.39712	5.41706	5.82568	5.53353	5.62767	5.66602	5.42481	5.83085	5.81931	5.34623	5.83833	5.5079	6.45965	5.76385	6.64686	6.01491	6.24707	5.63412	5.95631	6.11864	5.92468	6.28125	6.40265	5.27602	5.93458	6.10023	6.25189	5.61517	5.95803	6.10377	5.99481	6.23727	5.43819	5.44327	5.88892	5.41442	5.98456	6.11831	6.07733	6.39947	5.85912
AGAP1	5.54317	4.88452	5.39197	5.16808	5.69577	5.42762	5.3964	5.09431	5.24891	4.85724	5.41189	5.66491	5.71947	5.47427	6.03784	5.12006	5.17598	5.72188	5.63813	5.75965	5.66287	5.74764	5.03781	5.14329	5.52841	5.43928	5.24074	4.97744	5.58805	5.46009	5.56986	5.45013	5.52296	5.49453	5.51522	5.67766	5.23315	4.85464	5.4803	5.3746	5.17033	5.33319	4.91078	5.07015	5.04544	4.73234	5.4767	5.18223	5.02552
AGAP2	3.1614	2.10862	5.09904	4.52823	3.70897	4.28095	4.51368	3.89794	4.38883	4.1735	3.92357	4.25476	2.86906	4.44802	5.6054	5.63913	5.35987	5.80059	5.43749	6.00828	5.81338	5.74858	5.64883	5.66319	5.97168	5.54395	0.139764	0.134567	0.135641	0.133683	0.137795	0.136618	0.130235	0.132607	0.130235	0.173755	0.138676	0.140616	0.137795	0.130235	0.133683	0.140616	0.154631	0.15731	0.137795	0.162322	0.128661	0.132607	0.136618
AGAP3	4.81202	5.723	5.91442	5.76522	5.45461	5.53715	5.75489	6.19969	5.07457	5.73135	5.30449	1.74926	6.01993	6.60502	6.28873	4.42574	5.56634	5.75926	5.65737	6.21664	5.52259	5.60099	4.72496	5.31597	5.74725	5.6165	5.76864	5.73	5.61611	5.29222	6.24671	4.9202	6.28984	5.594	5.25035	0.582872	5.47732	5.47732	5.97168	6.3042	5.64602	5.70154	4.91154	3.99717	5.45663	3.99664	5.46162	5.69902	6.07246
AGBL1	0.669999	0.9931	3.17774	1.46614	2.28247	3.14385	0.216195	2.58901	1.28209	4.36529	2.95826	0.996803	0.809076	1.47422	1.03514	2.25079	1.26347	3.08633	1.93961	1.8645	1.44475	1.31466	1.65186	3.02865	2.62519	2.64584	3.33301	0.427274	2.80833	3.15004	0.477096	3.34949	3.49154	3.03843	0.413482	2.51052	3.85937	3.10474	3.09951	3.38614	2.37756	0.477096	2.42157	3.39747	0.455223	4.04816	3.18321	1.79933	0.571612
AGBL2	3.53263	1.49327	1.23046	3.35056	3.8007	2.82614	3.62787	3.70897	3.48927	1.43277	1.20639	3.96109	0.985361	3.41499	2.38283	3.41163	2.93139	1.78722	1.43782	3.04107	2.58901	2.02193	3.10015	3.47768	1.55439	1.3053	1.9281	2.01983	3.19144	2.50941	3.77385	0.270561	2.39213	2.96395	2.37662	3.36265	3.20008	1.29995	2.16399	3.22503	2.17988	2.91036	3.00191	4.06963	2.77348	2.39213	3.55979	2.70945	3.11685
AGBL3	1.08172	2.5607	2.74536	1.70262	1.21982	2.35338	1.02172	3.00706	2.50109	3.77385	3.16709	2.41902	1.46345	2.74455	1.2577	2.51522	3.49052	1.56807	1.08903	1.58955	3.71445	2.61065	2.88386	2.72359	1.61127	1.79318	2.9401	2.60062	2.57944	2.8397	2.78768	2.76309	2.72359	2.69315	2.79868	3.04936	0.43619	1.56411	3.29903	2.67909	3.25503	2.93499	1.56857	2.30244	0.448744	2.4865	3.25329	1.79107	2.80396
AGBL4	1.84532	4.33228	2.99171	4.22871	3.00122	3.05417	2.54993	3.51028	2.94677	3.977	1.79107	3.58257	2.87352	3.87371	2.67045	3.96678	2.93499	2.65246	2.34702	3.83265	3.76905	3.6489	3.20873	3.07312	1.75729	3.72898	2.6533	3.14613	3.95075	3.07312	3.53657	3.5068	2.98496	3.67391	4.31532	2.91197	3.55401	2.61676	3.42468	3.8031	3.21568	4.14278	3.71492	3.58049	4.47771	2.27162	3.7331	3.16896	2.42026
AGBL5	5.12857	5.31133	5.02142	5.58242	5.41153	5.35881	5.08255	5.08517	5.69172	5.21502	5.13281	5.27884	5.25072	5.96583	5.12894	5.11882	5.25599	5.13246	5.53391	5.24593	4.2645	4.67222	5.49377	4.72321	4.9665	5.21819	4.77096	5.06133	5.12932	4.66884	4.00822	5.00459	4.53041	4.68808	4.64118	4.68985	5.42008	4.62072	4.55535	4.50688	4.78088	5.76385	4.54648	5.95334	5.35881	5.2293	5.027	4.87154	5.20636
AGER	2.00196	1.52202	4.307	1.83019	3.70795	0.38922	2.70526	1.48001	1.12172	0.15731	2.89315	1.28317	3.77622	1.88164	4.00038	1.41111	1.37628	0.787871	2.59212	1.35236	2.23214	1.36015	0.578668	0.897003	2.20333	2.22052	1.4271	1.4101	1.43661	2.38036	4.42354	1.51946	3.97851	1.46294	2.8804	1.66503	1.42462	1.43922	4.01348	4.55725	1.44074	3.581	1.48791	3.93447	4.84173	1.56807	1.42799	3.74652	2.57109
AGFG1	6.50675	6.71985	6.55732	6.61004	6.82841	6.51851	6.71946	6.35086	6.5947	6.47089	6.62133	6.60324	6.61826	6.66148	6.56699	6.7749	7.29765	6.63974	6.7608	7.01477	6.69636	6.69671	6.64962	6.60547	6.7484	6.66065	6.85219	6.75441	6.9783	6.79543	7.18666	6.51971	6.90935	6.88118	6.6822	7.18582	6.96931	6.73039	6.8729	6.76644	6.29831	6.69068	6.61347	6.96541	6.50519	6.69541	6.47441	6.5174	6.29689
AGFG2	0.966458	4.59218	3.0637	3.3879	3.07048	4.24443	2.17478	3.86281	3.99008	4.20279	1.82939	3.80457	3.59608	3.94791	3.43459	3.77752	3.31518	3.43883	2.63284	4.24606	2.80833	3.39073	3.07663	3.55644	3.70203	2.32283	3.35056	4.29818	4.0799	2.43923	3.79131	4.01263	3.78093	3.41163	3.82471	1.29169	3.12712	2.45572	3.23144	3.80664	3.96294	3.88203	1.14777	1.21541	3.3379	1.21382	4.01482	2.94082	4.27965
AGGF1	6.50281	6.49311	6.72102	6.62394	6.58558	6.448	6.37791	6.38022	6.72794	6.23769	6.79365	6.63633	6.35326	6.44588	6.3236	6.43361	6.58127	6.64925	6.65521	6.97411	6.37171	6.59344	6.47089	6.75036	6.38658	6.12139	6.30719	6.40619	6.71076	6.58641	6.75746	6.43634	6.44209	6.52715	6.29304	6.67358	6.2843	6.37791	6.53312	6.4248	6.1722	6.05226	6.10598	6.24459	6.20765	6.02806	6.12577	5.99226	5.99516
AGK	6.79365	7.12065	7.31469	7.01329	7.26457	7.04561	6.81908	7.01092	6.91061	7.00403	7.3894	7.07448	7.19695	7.03555	6.43634	7.17844	6.27647	6.93647	7.05722	6.88245	7.14214	7.20746	7.43101	7.23082	7.20394	7.07943	7.02223	7.18755	7.1629	7.34093	7.48027	7.13941	7.12968	7.16185	6.99273	6.51235	7.50085	6.80622	7.48816	7.40022	7.35908	6.73161	6.9352	7.32228	7.18624	7.03667	6.99141	7.02416	7.13014
AGL	9.05756	9.49895	9.21257	9.31285	9.38268	9.39241	9.4147	9.34581	9.28211	9.32542	9.42454	9.60425	9.10401	9.43623	8.70856	9.70288	8.49779	9.40258	8.7571	9.09268	8.93654	9.03389	9.81845	9.25559	9.58846	9.09863	9.25088	9.87655	9.58345	9.6128	9.80026	9.36892	9.47035	9.05555	9.42454	9.26645	9.21442	8.86896	9.40765	9.59102	9.08426	9.08576	8.52412	8.9237	8.7218	9.11111	8.85264	8.94644	8.90287
AGMAT	2.80745	3.06109	3.18751	3.01712	3.40765	3.97234	3.88783	4.01482	1.4499	3.53206	3.72434	4.3657	4.02363	3.60495	3.844	3.34949	3.59286	3.29167	4.20596	3.454	3.31409	2.6841	3.00122	3.52049	4.6538	3.33673	3.1394	2.76823	3.75503	4.1019	3.17137	3.27914	2.91036	3.69863	3.46711	3.15109	3.02727	2.74181	3.37703	3.61325	3.70103	3.39697	4.0464	2.97447	2.34567	3.87621	3.1569	3.73001	2.9539
AGPAT2	6.38295	7.09699	6.76723	6.96931	6.02593	6.86888	5.95803	6.40491	6.35246	7.52246	6.15539	6.55247	6.32023	6.85707	6.11297	6.34487	5.97031	6.88077	7.06307	6.53164	6.02379	6.69714	5.89861	7.00676	6.40418	7.56038	6.77413	6.72366	6.59757	6.166	6.02254	6.72198	6.573	6.33647	7.20696	5.67358	6.80713	6.30719	6.48181	6.52479	7.62307	6.82485	7.1277	6.67154	6.63703	6.68078	6.87473	7.54168	7.16049
AGPAT3	6.22236	6.3308	6.65429	6.35933	6.9435	7.02168	7.16049	6.29381	6.76038	6.39407	6.87163	6.69848	6.93308	6.82485	5.80128	6.56871	6.76256	6.93865	6.8195	6.86657	6.36227	6.81398	6.51813	7.07825	6.50519	7.04194	6.20697	6.42374	6.23381	6.63379	6.47891	6.90976	6.59106	6.56778	6.67154	6.84598	5.97628	6.38414	6.14161	5.94885	6.63741	6.95611	6.97143	7.39445	6.5628	6.79322	6.94809	6.5914	6.45965
AGPAT4	1.39649	3.32226	2.68016	0.721846	2.71177	0.88582	2.64383	0.0948065	0.625505	3.23603	1.75322	1.64057	1.25981	0.844246	3.09431	1.26929	3.10725	1.47374	1.6979	1.64392	2.13442	3.47495	1.78776	1.14171	1.43004	2.00969	3.42146	1.15967	3.62667	1.21982	1.24503	1.26819	2.61879	3.80457	1.17121	1.39963	1.1793	3.68455	1.20639	1.21178	1.20366	4.12043	1.2406	1.32669	1.21126	1.31885	1.17513	1.16525	2.30244
AGPAT4-IT1	3.65715	4.32852	4.61478	5.25104	4.64904	4.35192	4.14463	4.40082	4.47148	4.32014	3.83356	3.08369	4.06777	1.94522	4.12092	4.68122	4.20044	4.78476	4.53824	5.06577	4.28673	5.13648	3.78583	4.19691	3.84888	4.04124	4.02487	4.86764	4.76209	4.66321	4.68808	4.63932	4.92732	4.16958	4.9414	4.5256	5.2467	4.91731	4.49999	4.25016	3.21243	3.61325	4.61311	4.39485	2.44907	3.56324	2.82531	2.46143	4.54038
AGPAT5	5.73388	5.74402	5.58502	5.66287	5.44185	5.39712	5.8228	5.41665	5.69761	6.0858	5.46916	4.89794	5.37786	5.19444	5.21987	6.1262	6.56158	5.51054	6.11899	5.6941	5.19546	5.83405	5.85489	5.35403	5.74826	5.8141	5.52841	5.81302	6.45807	5.94312	5.76236	5.96092	5.44601	5.75965	5.88253	5.11455	5.89518	4.86446	5.69137	5.64437	5.70745	5.57554	5.63994	5.73845	5.95524	5.95264	5.29069	5.43928	5.80309
AGPS	6.12364	6.21379	5.92022	6.75902	6.15755	6.329	6.19392	5.96358	6.35048	6.36154	6.30605	6.38617	6.3405	6.44479	6.38931	6.22608	6.30605	6.15987	6.25394	6.20335	6.32704	6.29725	6.84969	6.3225	6.31714	6.36341	6.46124	6.36074	6.58127	6.3597	6.63304	5.97384	6.23929	6.46668	6.23119	6.14631	6.53654	6.15647	6.31283	6.70656	5.9383	6.29761	5.93385	6.05063	5.93419	6.13906	5.91377	6.01198	6.09586
AGR2	0.543969	1.65142	0.329169	0.696252	1.45943	1.16061	0.170394	1.49666	0.415783	1.29451	0.0623053	0.335372	0.627871	0.799763	0.824316	0.199184	0.742936	0.778481	0.903566	0.855823	1.11446	0.851127	1.16632	0.715463	0.195204	0.912096	1.13531	1.11714	1.14232	1.17294	1.19958	3.35738	1.12278	1.17183	4.5121	1.35465	1.14118	3.74039	1.16694	1.16694	1.15903	1.15747	1.19903	1.27792	1.16955	3.11609	1.13307	1.12278	1.13182
AGR3	0.651607	3.42415	1.16116	-0.574069	1.6373	3.57826	3.29846	0.244416	1.15693	3.05417	2.54672	2.58157	0.585918	2.99491	0.174475	1.13999	1.28209	1.09889	0.969028	1.1261	1.54476	1.40909	1.68734	1.87632	1.18207	1.38602	2.79712	0.66768	3.82471	0.703093	3.34256	3.44414	3.53491	3.77521	1.22037	0.902902	0.692944	0.717336	2.3174	3.47209	3.27239	0.723596	0.77776	0.82764	2.77255	2.94082	3.59858	3.13645	0.687821
AGRN	4.50545	4.97157	4.35689	4.69759	4.52602	3.9654	4.26185	4.89609	4.76976	4.01723	3.74094	4.52736	5.67879	4.45912	5.24558	4.93449	4.78172	4.92264	3.94436	5.32353	4.04387	4.44021	4.55362	5.01101	4.68685	3.95075	4.7953	5.30479	5.05842	4.67179	5.02919	5.45353	4.25332	4.18371	5.05882	4.95539	4.68685	4.94953	4.93872	5.19075	4.65295	4.11198	4.68342	4.50176	0.844246	4.77634	4.05277	4.10751	4.57682
AGRP	3.57997	4.00624	1.86719	5.80828	3.64065	2.25079	1.99618	1.74671	5.44713	1.48896	5.6552	2.85193	4.92621	1.8368	3.16512	3.79388	2.40807	3.6744	3.98785	2.62392	1.55096	3.20818	3.42199	3.05081	5.20565	3.6154	4.05415	3.46921	1.68673	0.487355	4.19607	3.67528	3.97234	4.88917	3.96591	3.94347	3.19144	4.59957	4.64022	3.89085	3.87669	4.57603	4.28007	4.17936	0.502196	0.632566	4.12634	4.27921	3.60495
AGT	8.15044	8.25281	8.81695	8.27172	8.39494	8.58266	8.11177	8.71148	8.69214	8.95677	8.12471	8.84811	8.99933	9.26404	8.80965	8.34676	9.11469	8.54676	8.87627	9.12753	8.11928	8.89967	8.23903	8.47608	8.26715	8.37931	8.43566	8.67496	8.30941	8.19525	9.00578	8.81695	8.81262	9.0028	8.7408	8.37834	8.06914	9.10199	8.7795	8.92062	9.21442	8.39494	8.7557	8.65599	8.66348	8.74914	8.54894	8.64545	9.37373
AGTPBP1	6.97328	6.60274	7.34029	7.03515	7.79925	7.41646	7.38698	6.74628	7.237	6.95929	8.1271	7.32935	7.18624	7.43436	6.68736	6.87993	7.94439	7.89515	7.14801	7.59354	6.93914	7.50544	7.70424	7.16587	6.8227	7.49257	7.35055	7.75075	7.46843	7.60828	7.29706	7.81242	7.82627	7.32179	7.58555	6.70375	7.25625	7.38831	7.61744	7.41402	7.14214	7.01842	6.86526	7.27271	7.17065	7.13851	7.68353	7.52366	6.80146
AGTR1	6.73202	5.96327	5.48441	5.51981	6.0788	5.89999	5.75255	5.20299	5.44029	5.02102	6.4175	6.37751	5.5616	5.80546	5.57554	5.6301	5.48136	5.29335	4.84013	5.02919	5.57413	5.55342	5.40459	5.07688	5.27637	7.5248	5.7939	5.18481	5.37644	5.28409	5.49453	5.69443	5.84126	5.70154	5.63452	5.30805	5.45047	6.02489	5.97735	5.72526	6.23929	4.54384	5.26829	5.37496	5.90366	5.4194	4.90103	5.37318	4.83734
AGTR2	3.61487	4.06232	2.97714	3.1856	4.88091	4.17936	2.11353	3.32521	3.31462	3.18068	4.47771	2.59753	3.26267	3.45592	3.09014	3.35684	3.71779	3.94844	3.16709	3.05296	2.47157	3.22063	3.65768	3.55055	5.01389	4.20549	3.19015	3.63472	2.66969	2.84454	2.85193	2.84772	4.36529	4.0344	3.11212	3.83022	3.31963	4.29818	5.08762	3.38395	3.26398	4.44154	2.88793	3.7779	4.51828	-0.136194	3.32345	2.86609	2.97447
AGTRAP	5.17033	5.60286	5.6639	6.0878	4.95539	5.38152	5.04544	5.79823	5.27051	4.92222	5.18844	4.87726	5.02589	5.09228	5.15248	5.78376	6.27973	5.18681	5.21279	5.82346	4.75444	4.92305	5.56452	5.36331	5.23645	4.95876	5.57524	5.28132	5.38648	5.32015	4.989	5.45117	5.2228	5.46758	5.351	4.86024	5.76424	5.04582	4.02229	6.00907	5.14886	5.73351	5.68192	5.57803	5.32198	5.47025	5.16808	4.81522	6.10165
AGXT	1.06127	0.359418	0.991346	2.58901	2.03432	0.748851	0.718163	3.68351	2.42303	1.15639	1.33798	1.21541	0.514519	2.21922	1.11207	1.24619	1.5823	-0.218295	1.32619	2.15817	2.00306	0.290941	0.38922	0.829923	1.28209	0.1967	1.27549	1.25869	1.28822	1.31669	3.55598	4.22831	1.26091	1.31719	1.27321	6.76524	1.27274	1.28715	1.29995	1.30824	1.29305	1.29076	1.34017	1.43106	1.31092	1.41606	1.27549	2.98945	1.26819
AGXT2	1.28667	1.03439	5.10248	2.30782	1.39344	0.85031	1.22757	1.52501	1.41547	1.62714	3.03775	0.158611	1.10464	1.00375	0.495205	3.0214	1.94039	2.90323	1.22415	0.446691	2.62693	1.52658	2.75807	3.55213	1.68614	1.39911	2.73533	0.698918	2.8098	1.71586	0.76776	4.3814	0.715463	3.94258	0.691846	3.02568	2.40115	2.40428	3.44918	2.83616	2.74258	0.751474	0.813113	0.858616	2.5679	2.73323	2.81516	4.08079	3.29646
AHCY	6.85307	7.73244	7.42293	7.95974	7.68945	7.73705	6.50709	7.24853	7.12252	7.67251	7.12301	7.64832	7.45811	7.78696	6.94488	7.02274	7.7364	7.32996	8.02052	7.33275	7.79464	7.36313	6.75788	7.50981	7.32393	6.89919	7.4275	7.49033	6.98015	7.25584	6.43324	7.38698	7.16185	7.45584	7.22815	7.1802	7.43647	7.4931	6.68601	6.56739	7.46675	7.51348	7.94284	7.9729	7.95639	7.70424	7.91355	7.79992	7.7695
AHCYL1	7.46281	7.44467	7.58143	7.07267	7.13212	7.20944	7.25677	7.09792	7.43941	7.21099	7.08332	7.28589	7.55398	7.41766	7.20247	7.4388	7.35751	7.26946	7.51475	7.15093	7.09064	6.92701	7.47744	7.17927	7.42408	7.53349	7.47623	7.25723	7.42691	7.21995	7.52426	7.46057	7.11482	7.13941	7.34793	7.42631	7.55735	7.11671	7.53991	7.51348	7.18125	7.33481	7.08232	7.27476	7.35113	7.20247	7.26406	7.35349	7.51348
AHCYL2	6.16174	5.52589	5.74085	5.82032	5.44977	5.00302	5.30907	5.1815	5.44295	5.93146	6.0878	6.04402	5.66063	6.30984	5.43144	5.8402	5.73135	5.17807	5.26792	5.42731	5.35556	5.49091	5.48953	4.88371	5.84447	5.54468	5.402	5.44536	6.26702	5.30666	6.32553	6.17155	5.54915	5.5102	5.54317	5.22588	5.43963	4.91646	5.79791	5.99481	5.49671	5.23315	5.03138	5.72376	5.29258	5.1536	6.15071	6.16517	5.4553
AHDC1	3.32398	3.56709	0.568939	4.38237	3.52591	3.88343	3.30741	4.13464	2.6359	3.7331	3.24419	3.64662	2.47573	3.36731	3.05592	4.3436	3.07866	3.53547	3.77385	4.99261	3.9008	2.56692	3.19456	4.32482	3.64065	3.47152	2.92241	4.58963	4.67018	3.74849	5.11419	3.88203	4.25558	4.56548	2.65539	3.62605	1.10065	4.56632	3.21931	4.32324	4.58869	2.86671	4.88417	3.34256	3.14194	4.5568	3.91708	3.61895	1.87223
AHI1	5.0772	4.59096	3.96389	4.41216	4.99261	4.80108	4.87677	3.99482	4.93409	4.01482	5.14253	4.24399	4.13934	4.38495	5.542	4.97113	4.50301	4.60583	4.31694	4.9418	4.57359	5.23805	4.55318	4.76209	4.15085	4.77134	4.74117	4.84649	5.16581	4.75525	5.11965	4.60625	4.16195	4.23711	4.5628	4.84048	4.95584	4.47966	4.96477	5.21206	4.73018	4.58782	3.42679	3.83826	4.30962	3.88636	4.32324	3.76549	4.1859
AHNAK	7.30872	6.73747	6.52519	6.57345	7.1697	6.87906	6.95847	6.52643	6.74497	6.85014	6.44095	6.83821	6.86606	6.69928	7.1003	6.09062	7.23357	6.41335	6.23684	6.77223	7.25427	6.84919	6.2591	6.5135	6.45732	6.28658	6.53857	6.3095	6.62052	6.66027	5.88588	6.87602	6.79238	6.42629	6.82312	6.23152	6.64175	6.74278	6.56352	6.15144	6.96433	6.80325	5.93609	5.86205	6.72575	6.42046	6.27861	7.0527	6.86489
AHNAK2	3.95872	3.50476	3.44214	2.81663	2.8279	1.56256	2.56998	2.02879	2.31623	3.46009	-0.0780842	1.70923	4.19607	3.84305	1.49389	1.43559	4.5187	1.77681	2.81516	1.08663	2.6369	1.42848	1.73554	2.00306	1.52202	0.835975	4.71639	4.12273	4.75001	1.45884	1.48381	1.50874	4.00281	1.45416	4.00281	1.65531	4.1887	4.82974	1.44191	4.74326	4.05596	4.86277	1.47794	4.14702	3.62985	1.55565	2.0425	1.40718	2.53032
AHR	6.82194	6.91856	6.38414	6.60676	6.61986	6.17002	6.66959	7.27061	6.86449	6.26929	6.64649	6.40453	6.2439	6.8223	6.29985	7.07548	7.33275	7.10684	6.61124	7.224	6.48095	6.27006	7.03196	7.01971	6.6359	6.44325	6.97686	7.14313	6.79543	7.08287	7.21	6.1449	7.08614	7.42691	6.44406	7.0123	7.29872	7.28054	7.18907	6.92996	5.91115	6.92396	6.90128	7.07548	6.88863	7.1935	6.03962	6.12395	6.85057
AHRR	3.18011	3.49052	3.8378	0.989307	4.19562	4.64575	4.46132	5.54039	3.40609	3.73683	4.06394	3.01849	5.10797	4.57401	2.99171	4.17179	3.98273	4.45313	4.01441	4.13627	1.95462	3.79595	4.19097	5.17764	3.8007	3.65514	4.15388	3.91041	3.14126	4.0883	4.63838	3.21197	4.60419	4.09475	3.52634	4.31968	0.60871	4.37382	4.48931	3.65715	5.19001	4.66843	4.62364	4.17665	4.90618	4.54077	4.83607	4.83848	4.02051
AHSA1	8.4791	8.11608	8.74423	8.23221	8.40121	8.25176	9.04465	8.51427	8.73234	8.31801	8.57814	8.18269	8.78078	7.94898	8.49537	8.28013	7.85077	8.4823	9.03389	8.50198	8.41034	8.56307	8.20353	8.79381	8.28013	8.47698	8.27075	8.15391	8.5423	8.06756	8.07997	8.53033	8.50771	8.4073	8.62558	8.44223	8.15044	8.20105	7.97541	8.22654	8.72426	8.48916	8.41236	8.58375	8.61542	8.5477	8.49227	8.3887	8.52412
AHSA2	6.13255	5.75454	5.85451	4.91848	5.79683	5.80341	5.68369	5.60647	5.67395	5.60506	6.02655	5.93037	5.14804	5.11235	6.92919	5.30771	5.38468	5.34848	5.36833	5.64231	5.6705	5.97628	5.25776	5.92538	5.00539	5.27112	4.94263	4.77915	5.50899	4.46625	5.26905	5.69172	5.76657	5.402	4.71978	5.15624	5.1266	5.58577	5.17954	5.77957	5.92538	5.15395	5.0864	4.50219	5.25368	5.10513	5.58845	4.88648	5.60777
AHSG	1.26671	3.55644	3.29903	3.83636	3.28327	3.94301	1.54592	2.86082	3.78334	4.22736	3.89426	2.92151	3.93163	0.69508	2.81663	3.06775	3.54692	2.72179	3.25572	4.00376	3.24537	2.4732	3.52866	3.40279	3.17019	2.28787	2.10862	2.309	3.2466	3.62166	4.7377	2.69022	4.76683	3.77296	2.98352	3.38725	3.36795	3.36368	3.55443	4.44067	3.72282	3.56764	3.62787	4.32145	3.63258	3.97851	3.81015	3.76802	3.87525
AHSP	4.04951	4.08738	4.86066	4.59345	4.19477	4.48772	3.76657	3.67895	2.64809	4.33466	4.56507	4.2641	5.10097	5.14209	4.46444	4.07005	4.90212	3.66947	4.09156	3.80566	3.88733	5.04902	4.41591	4.04251	3.88733	4.33466	4.18547	3.6526	4.2412	4.87358	3.54791	4.48931	4.02363	4.70402	4.69882	3.80012	3.44706	4.41459	5.06539	4.99015	4.96477	2.78768	4.69437	5.44468	4.49756	3.64261	4.67057	4.79963	4.07795
AICDA	-0.218295	2.45662	0.526119	1.71284	0.343142	1.46001	2.71683	1.48627	3.00051	1.52866	1.8181	1.15851	3.87915	2.02879	0.67942	0.9956	1.9183	0.799763	1.27644	2.03541	0.177889	1.03567	1.54417	2.06809	0.690878	0.560386	0.927934	1.57661	3.33432	0.953964	3.51661	0.9956	3.56276	0.969647	0.921301	2.80316	2.65984	3.03061	3.27239	2.467	0.945583	0.956027	3.33554	1.07554	0.961197	1.0648	0.91807	3.37203	0.931682
AIDA	8.51672	8.27332	8.44739	8.32895	8.51322	8.47396	8.74914	8.65226	8.34292	8.47284	8.31302	8.40306	8.61416	8.4637	8.22851	8.58266	8.70726	8.41345	8.39593	7.97212	8.19143	8.42309	8.5861	8.18948	8.09	8.35812	8.23122	8.30073	8.42529	8.51126	8.61025	8.4335	8.56076	8.59726	8.3844	8.51898	8.18167	8.55333	8.58864	8.53033	8.33373	8.25058	8.55964	8.30557	8.28689	8.48916	8.21825	8.27075	7.96973
AIF1	5.64374	4.35466	4.86197	4.79751	5.5041	3.67733	6.0672	5.89929	5.30411	3.83864	4.77055	3.72172	4.82487	3.74197	4.47368	4.60502	8.03697	5.15966	5.12932	4.70585	4.07233	4.62835	5.53353	4.87592	4.88417	5.23315	5.51809	4.98274	5.51668	5.48101	5.19693	4.46492	4.58693	4.18678	3.99617	5.51767	4.62499	6.75788	5.01464	3.69053	4.38237	4.83848	6.32622	5.16849	5.28881	3.91659	4.77306	6.01236	5.36366
AIF1L	6.79277	6.78258	6.64409	6.41234	6.65139	6.74278	6.36041	6.63855	6.82522	6.53818	6.4915	6.42014	6.74539	6.86747	6.29211	6.34727	6.75991	5.67627	6.29941	6.47045	6.68428	7.02865	6.55652	6.78756	6.1045	6.94446	6.54501	6.14312	6.55167	6.51235	5.99901	6.47366	6.05709	6.01082	6.53737	7.01139	6.14128	6.73705	6.57651	5.9511	7.07179	6.56466	6.91981	7.11584	6.59797	7.20485	6.92956	7.31469	7.01924
AIFM1	7.41467	8.13839	9.02454	7.94746	8.87494	8.11529	8.87764	7.99382	8.12243	8.05508	8.17892	8.17139	8.69363	8.63392	8.1844	8.26891	7.28098	8.4191	8.30471	8.10382	9.12572	8.59341	8.79677	8.49024	8.56307	8.40306	8.22939	8.37726	8.52657	8.40622	8.47026	8.96049	8.7189	8.24073	8.74423	7.97943	8.1668	8.18767	8.26053	8.35917	8.82708	8.46606	8.23903	8.62445	8.62053	8.5861	8.57332	8.65098	8.79143
AIFM2	6.10085	6.1053	6.01382	6.13477	5.68664	5.78976	5.76972	5.58391	5.81099	6.09208	5.37206	5.21465	5.62426	5.83366	5.69902	6.00721	5.54437	5.07688	6.13791	5.53216	5.9297	5.64602	6.09331	6.36692	6.09871	6.12292	5.49018	5.75965	6.05329	5.93251	5.68558	5.88826	5.68906	5.47598	5.92755	5.13426	5.65234	5.35444	5.74693	5.34285	5.98208	5.33283	6.23455	5.89268	6.35632	6.03325	5.93282	6.32473	6.1545
AIFM3	4.60009	5.31636	4.42304	3.76699	2.41046	4.9414	2.37033	1.73098	3.80919	5.03213	4.50091	2.40327	2.445	5.87552	4.06921	3.9649	4.13887	3.73112	5.69236	4.10879	4.00468	3.72481	4.06	4.6123	4.1887	4.08223	4.2587	4.02314	3.90577	4.58527	4.74897	4.33863	4.28049	3.97337	3.71626	3.9535	4.80227	3.57707	4.72773	4.41765	4.43009	3.99717	3.75403	4.765	4.17485	5.42862	4.29601	4.51535	-0.70291
AIG1	7.14256	7.42408	7.88915	7.61019	8.13668	8.21162	7.918	7.47676	7.45939	7.40382	8.14087	8.00386	7.53926	7.5368	7.10987	7.46341	6.97143	8.14268	7.46401	7.68945	7.74515	7.82989	7.92469	7.78485	7.57201	7.93877	8.15825	8.12243	7.44933	8.00312	7.62009	7.82627	7.72129	7.63818	7.89164	7.9121	8.20638	7.65416	7.76546	7.84926	7.97051	7.46905	7.42185	7.57449	7.5782	7.84652	8.11024	7.88552	7.59728
AIM1	5.513	4.307	4.49386	4.60042	5.0279	4.32599	6.3206	5.89447	5.04544	3.54958	5.04866	4.4272	4.80569	3.85848	4.27879	4.5698	7.12415	4.57475	4.64167	4.64995	4.72411	4.70896	5.22098	5.02552	4.39825	4.71461	4.42121	4.35956	4.92697	4.8284	5.77586	4.07433	5.27188	4.56507	3.62494	4.52067	4.75444	5.30111	5.28723	5.34251	5.20565	4.50545	4.17665	4.73652	4.50349	4.77186	4.1542	5.50338	4.47721
AIM1L	3.57944	3.24477	3.17664	3.43983	2.52574	4.69607	3.75149	3.65111	4.03689	3.16896	4.70307	4.56891	3.4295	5.23933	5.34087	3.69592	3.45592	4.09102	3.96109	4.30576	3.68604	3.91708	3.50578	3.87423	4.4012	4.04769	4.45735	4.52353	4.01921	3.80712	0.829078	3.99899	3.44365	3.40279	4.39485	3.88535	4.90103	4.31798	3.50124	4.58527	0.788762	3.72742	0.868692	0.912096	4.01348	3.62218	3.87958	4.0813	4.34647
AIM2	3.03572	4.19955	3.33673	4.6179	0.57298	5.1305	4.6179	5.60849	2.93865	4.3445	4.33384	1.62296	1.32619	1.76853	1.50924	3.00051	5.33246	4.15971	2.77255	3.40945	3.58257	3.97653	3.28801	3.53934	3.46219	2.85358	3.33187	0.386451	5.19113	5.85249	3.79746	2.89315	5.00585	2.94677	3.95963	-0.24214	4.43285	5.41552	5.17228	5.23422	3.78137	3.01426	3.03843	3.61753	3.34024	5.0435	2.47029	4.94396	1.98163
AIMP1	6.90048	7.24018	6.95796	7.48688	7.21945	7.26509	6.9773	7.1802	7.23908	7.32446	7.22606	7.19155	7.06848	7.01384	6.79238	7.05068	7.09991	6.92661	7.17689	7.00589	6.9981	6.99904	7.34141	7.06506	7.13104	7.26946	7.13421	7.16826	7.27934	7.20797	7.14158	7.05117	6.93689	6.9723	7.09405	6.98585	7.09504	7.16911	7.09647	7.0546	7.1089	7.03667	7.12511	7.02518	7.14713	7.15093	6.83952	7.10634	6.67396
AIMP2	7.86087	7.79602	8.36402	7.77082	8.42309	8.21516	8.30471	7.79793	7.65944	7.38647	7.87202	7.38763	8.39494	8.04837	8.16838	7.96739	7.48027	7.78617	7.75006	8.05322	8.57688	8.20537	7.91128	8.31801	8.0166	8.04369	7.67178	8.03072	7.91355	8.06914	7.90898	8.26053	8.04603	7.79864	7.76487	7.69862	7.86313	7.88237	7.58269	7.51475	7.71801	8.04448	8.59204	8.66996	8.14533	8.2417	8.34489	8.4211	7.93466
AIP	6.92874	6.86489	6.39947	6.44057	6.83998	7.22868	6.9906	6.94942	6.53008	6.62052	6.5884	7.0576	6.83499	6.95662	6.70267	6.70463	6.20439	6.81359	7.18333	6.57412	6.61702	6.49264	6.62212	7.5031	7.1649	6.42267	7.0045	7.10224	6.90262	6.94991	6.48137	6.86365	6.72102	6.86198	7.09792	6.88606	7.24167	7.10593	6.60274	6.53276	7.00086	6.83735	7.25222	7.20301	7.41241	7.26509	7.09598	7.1823	6.74993
AIPL1	3.96294	4.42121	4.86646	3.95558	3.70148	4.05319	3.9373	3.85987	2.98063	4.38097	2.67587	3.77203	3.30959	4.30795	4.44802	3.43506	3.32966	3.92488	4.04296	4.9391	3.09688	3.69053	2.9063	4.28391	4.35645	3.31409	3.32834	3.73426	2.93139	4.30366	4.2641	3.8989	3.51183	4.16332	4.40963	3.86569	4.27356	3.16962	4.35854	4.27524	3.52926	3.94119	5.10835	3.77111	3.70851	4.31745	4.77134	4.12273	3.36494
AIRE	2.98496	1.72967	1.97925	2.79784	1.80199	5.6032	3.72125	1.2505	2.41266	4.45778	2.34567	1.64958	3.90673	3.78189	3.04031	2.81945	1.51138	3.63702	3.56853	4.60204	3.64936	2.9669	3.51613	3.72387	4.16785	2.95458	3.1279	4.283	4.4195	5.23933	2.81337	4.01723	4.20004	3.07381	4.13507	4.10314	4.0107	3.45692	0.580147	2.15436	4.04722	3.87167	3.90853	3.5226	3.96733	0.711878	2.86298	0.53638	0.568939
AJAP1	1.20225	1.16415	1.48469	1.13531	1.23209	0.492729	1.24445	0.264489	1.13124	1.08782	1.04773	1.26293	1.38822	1.18616	0.595793	0.352231	1.01524	1.30275	0.971437	0.953297	0.397313	0.570405	1.01587	1.18663	0.521479	1.35802	1.44729	1.43106	1.45572	1.49173	1.51526	1.54183	2.43091	1.48324	1.44237	1.68673	1.44237	1.45613	1.47216	1.47528	1.46001	1.46443	1.5082	1.59908	1.47168	1.58847	1.44827	1.43922	1.43052
AJUBA	5.41596	5.83157	5.80792	6.02489	5.5428	6.16929	6.01606	6.26358	6.15217	6.34554	5.46457	6.08204	5.6911	5.97066	6.55818	6.24601	5.07502	6.17997	6.04438	6.26022	7.22348	6.17407	6.3042	6.15337	6.56243	5.84513	6.62742	5.83405	6.65139	6.14161	5.68091	5.7883	5.92503	6.59871	6.58923	6.1474	5.84158	6.35004	6.29794	6.1218	6.60149	6.37679	5.81584	5.40315	6.1445	5.67464	6.23197	6.45453	5.56092
AK1	7.96434	8.39076	8.28403	8.44087	8.76957	8.46182	7.94284	8.08845	8.63162	8.6989	8.51012	9.09268	8.91894	9.15084	8.38119	8.65599	7.37388	8.77222	8.65934	8.46723	9.01974	8.73234	7.81967	8.83301	8.81837	8.74309	8.34579	8.79381	8.07917	8.45878	8.31495	8.68832	8.4801	8.93956	8.82571	8.18356	8.65351	8.9299	8.38649	8.26979	7.73445	8.58735	8.91563	8.8966	8.51548	8.91254	8.46606	8.93476	9.02454
AK2	6.61306	6.48181	7.12866	6.89172	7.08561	6.59257	6.76161	6.54619	6.8195	6.45219	6.73993	6.61196	6.94396	6.81184	7.63121	6.4589	7.03717	6.65474	7.19904	7.05117	7.2618	7.28851	6.67878	7.13764	6.46957	7.11276	7.1594	7.1436	6.90575	7.19496	6.95796	7.0576	7.0924	7.07742	6.97597	6.46586	7.40499	7.17891	7.14214	7.0704	7.22815	6.85402	7.32935	7.23406	7.5042	7.12355	7.40088	7.51348	7.2319
AK3	9.96296	9.67706	10.2241	9.90005	10.2205	9.98747	9.98434	9.74082	9.86986	9.94617	10.0171	9.95629	9.97375	9.85362	9.27098	9.83441	10.0762	10.0956	10.0922	10.3722	10.0014	9.9074	9.88897	10.0835	9.91504	9.94617	9.92295	10.1361	10.1675	10.2389	9.99435	9.93294	9.97698	9.96296	10.0014	10.1627	10.145	9.83441	10.2389	10.2241	9.71829	9.54803	9.48259	9.67134	9.59583	9.52365	9.78191	9.69352	9.70288
AK5	3.93399	3.81056	2.96547	4.05127	4.77134	3.47956	0.199973	1.32106	2.88386	3.98508	3.80405	3.91238	2.88548	3.50476	3.33852	2.09696	2.99491	3.61378	1.83605	2.77734	2.99411	3.41732	4.29731	2.70622	1.7796	3.64261	2.08972	3.90898	3.72953	4.01615	3.18491	4.13627	4.07941	3.90369	3.70148	4.87952	4.84334	3.77942	3.66496	4.29518	2.49246	3.10293	3.94119	4.16868	3.64768	0.645974	4.14463	2.70296	3.14314
AK7	0.708972	1.34361	2.90885	2.93222	1.49327	2.79389	1.39188	1.34878	1.59312	1.57322	2.5607	3.11754	1.26244	1.11076	0.676375	1.40459	1.06292	0.781656	2.02291	1.15903	1.13954	1.30169	2.58045	1.34654	1.15903	1.43106	1.29305	1.27644	1.30639	1.33741	1.3591	2.62617	1.27844	1.33741	3.6768	1.52406	1.29348	2.18112	1.32057	1.32817	2.22333	1.30933	1.36152	1.44827	1.32817	1.43609	1.29451	1.28614	1.28614
AK8	5.3488	4.04076	5.12577	4.78088	4.63036	4.14234	4.39271	5.42047	4.99504	5.23385	5.00826	4.39321	4.95406	5.20599	4.61432	4.43614	4.50135	4.72608	4.73975	5.64534	4.77876	4.49042	4.73975	5.34439	5.67222	4.57147	5.18303	5.40534	5.16347	5.07097	3.86526	5.64023	4.52865	5.2026	4.50545	5.92234	5.53463	5.24891	5.09474	4.85763	4.3657	3.9456	4.47107	3.79286	4.22736	5.69337	4.17305	4.61024	3.99051
AKAP1	8.19614	8.29599	8.53241	8.12397	8.62917	8.75329	8.64295	8.15146	8.22654	8.33675	8.62558	8.67222	8.36765	8.54552	8.0928	8.24744	7.29651	8.05841	8.03294	7.90679	8.65599	8.38544	7.63061	8.2172	8.26798	8.30941	8.44949	8.26891	7.62629	8.18948	7.77839	7.86161	8.15234	8.12312	8.46487	8.3551	7.94152	7.82176	8.18686	7.28701	8.41687	8.5513	8.53129	8.45981	8.68952	8.4191	8.76115	8.56777	8.61935
AKAP10	4.84294	4.02899	4.13151	4.11291	4.87318	4.23438	4.6449	4.48239	5.0042	3.88437	4.61515	3.7041	5.03532	4.29818	3.54398	5.27767	5.12706	4.54827	4.02762	3.71626	3.87423	4.92181	4.69026	4.20184	4.17079	4.3118	4.34498	4.61064	4.03024	3.39368	4.5203	3.03713	4.6843	3.26511	4.34279	3.43	3.8989	4.30618	3.75461	4.6509	4.40529	4.68122	3.53206	4.25432	3.82471	3.51613	3.70254	4.15085	4.30541
AKAP11	7.09457	7.12714	7.08434	7.07491	6.85983	6.84254	6.73827	7.09064	7.00263	7.12714	7.2512	7.07943	6.91775	6.8725	6.48996	6.69373	6.96824	7.01435	6.43448	6.86323	6.94446	6.92483	7.38165	6.82398	6.89842	6.9764	6.52965	7.237	7.24018	7.04194	7.0123	6.98395	6.76524	6.97023	6.84166	6.85057	7.07548	6.49187	6.84831	6.94533	6.41674	6.65092	6.05747	6.42014	6.61471	6.73039	6.59344	6.77751	7.09647
AKAP12	7.30027	6.08204	6.2	5.64265	6.61903	5.769	6.1828	5.99624	6.53241	5.86621	5.86584	5.66742	6.55565	5.80167	6.6359	5.46055	6.03231	6.24567	5.53216	6.52157	6.38891	6.27388	5.85816	6.71985	5.89898	6.45807	6.00907	5.68594	5.5424	5.52841	6.04806	6.22029	5.8848	5.8267	6.03893	6.04108	6.2961	7.1594	5.70961	6.63507	5.88413	6.18114	5.26088	6.04655	5.54006	6.00072	5.40009	6.02074	6.62431
AKAP13	7.55735	7.04476	7.21995	6.79365	7.24586	7.04781	7.6355	7.02999	7.33636	6.78388	7.09064	6.5607	7.51654	6.95611	7.27992	7.26023	6.56625	6.91601	6.79543	7.79992	6.84125	7.3463	6.93997	7.36417	6.77047	6.45772	6.86787	6.80024	7.51293	6.92996	7.05932	6.83535	7.11276	7.14418	7.10987	7.08287	6.85888	6.67154	7.02168	7.15277	6.86934	7.37388	6.88738	7.12714	6.7993	6.49478	6.64099	6.55652	7.23808
AKAP14	0.135641	1.34415	3.31234	2.73125	1.1385	1.36936	2.03351	2.24248	2.77348	3.56906	0.574466	3.19954	1.68844	2.01859	0.225945	2.3174	1.84785	2.81426	1.59194	1.13692	1.82096	1.78098	3.03643	1.85427	1.26871	1.67263	2.8159	2.77444	3.0536	2.99712	2.23987	2.75995	1.65715	2.73992	0.542348	3.14675	0.580147	2.76983	2.01285	2.22971	3.0536	2.63284	2.89078	0.726896	3.01217	2.89226	3.12647	2.64699	1.14232
AKAP17A	6.30064	6.3619	5.9383	5.8511	5.65303	6.32553	5.68091	6.32394	5.71179	6.41948	6.1262	6.26891	5.47537	6.10234	6.25394	5.56559	5.53104	5.6625	6.64175	5.67288	6.10794	6.48721	6.25743	6.11714	5.26523	5.75718	5.77796	5.63073	5.85944	6.16247	5.91377	5.89337	6.10794	5.66711	5.67222	5.71874	5.37281	5.80278	5.8815	5.91442	6.22192	5.65412	5.58502	5.40238	5.80929	5.44327	5.84937	5.62039	5.58109
AKAP3	1.02662	5.65377	2.65246	1.68898	4.10144	7.01714	2.49014	4.58239	4.85724	5.26447	3.81398	4.07483	1.56485	3.80566	1.44937	2.37756	4.41719	3.7829	4.57643	1.48896	3.53817	2.60465	3.33134	3.76151	3.31181	4.67309	3.43397	2.11219	3.87167	5.28454	4.55318	0.371782	3.05707	4.64539	2.56385	0.545783	2.72621	4.55535	4.12413	0.362582	4.54335	0.374773	4.57475	4.34729	0.365239	5.53064	0.329169	4.9665	4.38665
AKAP4	0.866465	0.652592	0.755112	2.81516	0.131673	3.69053	-0.197427	1.2972	2.19825	1.33631	1.1261	1.02228	0.966458	3.87039	0.0992894	2.23214	0.100772	1.98053	1.54592	2.47157	0.91541	1.39963	2.06701	1.26513	1.08959	1.49952	3.02642	4.4889	0.940952	0.968427	1.00375	1.00761	0.927934	0.980098	0.933759	1.16577	0.937977	3.95963	0.970766	0.96319	0.956027	0.9678	1.02046	1.08725	0.972104	3.45183	0.927934	2.5426	0.944292
AKAP5	0.758325	1.47074	0.864547	0.869368	1.21814	1.04479	1.42211	0.224419	0.931682	0.584619	0.698918	0.218078	1.0678	1.3235	0.100772	0.221297	1.39694	-0.0866163	0.0608508	0.182165	0.245495	1.02228	1.15747	0.93034	0.121585	0.171148	1.23734	1.21082	1.82248	1.27274	1.29305	1.32157	1.21593	1.26566	1.22546	1.45358	1.22989	1.24376	1.25869	1.26403	1.25161	1.24826	1.29263	1.38657	1.26671	1.37122	1.22546	1.21704	1.22079
AKAP6	5.57413	6.24638	6.25625	5.87962	5.73743	5.69337	6.2884	5.87759	6.20151	6.03124	6.27576	6.10234	6.32784	6.07066	6.03231	6.32133	5.02434	6.31556	6.42374	6.79506	6.23345	6.601	6.24283	6.37751	6.03707	6.00795	5.95071	6.24205	6.73787	6.14562	6.93689	5.77556	6.21121	6.41113	6.4589	6.15038	6.14852	5.11305	6.70506	6.36533	5.92269	6.25517	5.58577	6.34697	6.34727	6.00795	5.8644	5.67464	6.17617
AKAP7	4.9835	5.37749	5.43409	5.26148	5.63177	5.72707	5.62004	5.17764	5.43299	5.74165	5.83157	5.89553	5.42696	5.5194	5.25072	5.13538	5.75327	5.4767	4.98812	4.85974	5.08683	5.83474	5.97657	5.33975	5.01941	5.66491	5.13866	5.97628	5.61944	6.06851	5.17881	5.72562	5.66848	5.5569	5.78449	5.08841	5.81513	5.38184	5.84937	4.5369	5.5579	4.99592	4.49999	5.08292	5.43634	5.38799	5.42154	5.96059	5.30006
AKAP8	6.19214	6.13037	6.27539	6.10205	6.13673	6.2843	6.01679	5.88695	5.87312	5.89649	6.13824	6.6637	6.24083	6.23119	6.75119	5.87962	5.8245	5.89825	6.14631	6.15647	6.57929	6.09871	6.01342	6.33381	6.11335	6.09133	6.3807	6.01855	5.98496	6.4104	6.16863	6.39006	6.22933	6.41837	6.13362	6.89791	5.9335	6.44406	6.33231	5.77694	6.66598	6.15721	6.27114	6.52602	6.56552	6.601	6.19457	6.39366	6.169
AKAP8L	4.93872	4.66929	4.49133	4.90252	4.85426	5.06417	4.64824	4.84861	4.95241	5.45792	4.82636	5.59464	4.55162	5.03176	5.22502	4.41086	3.94943	4.46851	4.70896	4.62748	5.07574	4.9629	4.43324	4.95743	4.71137	4.60712	4.93301	4.97819	4.5832	4.09251	4.11948	4.5832	4.80384	4.49386	5.04621	4.61676	5.30945	4.30871	4.5369	3.57058	5.43409	4.55318	4.97157	4.12717	5.49671	5.33139	4.68939	5.35987	4.58159
AKAP9	6.29254	5.97488	6.10701	5.83085	6.21019	6.14197	6.27221	6.14019	5.92683	6.01993	6.5695	6.28948	5.87092	6.25625	6.11831	6.37909	5.33035	6.90083	5.83405	5.93319	6.16788	5.98779	5.97955	5.99412	6.02519	6.36074	5.70671	5.91002	5.91412	6.22933	6.61196	6.73039	6.2297	6.12001	6.40453	6.24003	6.29343	6.01828	5.95071	5.93503	6.12395	5.81235	5.13866	5.80402	5.83304	5.89967	5.96464	5.41596	5.50635
AKIP1	6.79715	7.13104	7.18333	7.17638	7.03462	7.00548	7.19305	7.1935	6.79455	7.12301	6.668	7.04	7.1629	7.34469	6.32473	6.98751	7.07788	7.16826	7.25175	7.04376	7.15879	7.07825	6.9649	7.1731	7.18811	6.76256	6.93821	7.10456	7.0527	7.09746	7.09064	7.05068	6.88328	6.9134	7.17363	6.13824	7.28423	7.07548	7.02566	6.97778	7.09647	6.94488	7.2137	7.10987	7.20944	6.92356	7.19791	7.15832	6.93997
AKIRIN1	6.25223	6.65474	6.68131	7.23966	6.66514	6.95847	6.9552	7.07995	6.62864	7.1381	6.56699	7.0666	6.82697	7.30656	7.1089	6.57081	6.25985	6.72794	7.10407	6.67227	7.24531	7.30135	7.10634	7.14158	6.83608	7.09598	7.05068	7.10634	7.09892	6.83735	6.45051	7.04287	6.70819	6.47971	6.95662	6.76305	7.0546	6.5135	6.78051	6.93742	6.6822	6.85219	6.28245	6.97501	6.66718	7.02951	7.1722	6.97597	6.85589
AKIRIN2	6.57205	7.08519	6.40769	7.19204	6.36929	7.01924	6.63156	7.23651	6.46055	6.67878	6.45501	6.85497	6.56393	7.09943	6.0795	6.54469	6.38734	6.77182	6.57345	6.57378	6.14852	6.5032	7.40913	6.94309	6.98395	6.76208	7.13851	6.84461	6.88467	6.61238	6.61388	6.70613	6.54777	6.68003	6.47854	6.09519	6.94768	6.47854	6.19885	6.33752	6.77271	6.89258	6.43126	6.70656	6.56466	6.28357	7.01971	6.71624	7.28589
AKNA	2.55657	3.65672	1.10625	2.86228	1.31142	0.64949	3.74652	4.04994	1.23954	0.624278	2.45453	1.26403	2.40327	1.85427	2.83287	0.91738	2.06809	2.47906	1.94429	1.50208	3.17199	0.88732	1.38602	0.881958	1.44784	1.73733	1.43464	1.41765	1.44529	2.36297	1.50097	1.52762	1.41667	1.4696	1.43167	1.67321	1.43106	1.44632	1.46063	1.46345	2.83367	1.451	4.02402	1.58571	3.42737	3.69536	1.43559	1.42462	4.05415
AKNAD1	2.22052	3.37888	0.868692	0.898403	2.61879	1.45774	0.294409	1.80634	3.11817	1.87062	2.11883	2.76164	1.50874	2.75283	3.20129	3.43789	1.82544	3.60108	1.74619	2.05552	1.75797	1.18663	2.27282	0.780779	0.874871	1.43609	1.74871	2.56581	2.61571	2.94677	3.45292	2.64289	3.26696	2.91913	1.11388	2.86451	2.40428	3.31518	3.08297	2.99109	2.92465	0.632566	2.5426	0.724316	3.09749	2.79469	2.69315	2.48427	2.20477
AKR1A1	7.15143	6.88245	6.61702	6.93953	6.79798	6.64571	7.06992	6.86064	6.68384	6.68041	7.18755	6.94854	6.71873	6.73827	6.73115	6.99722	7.73509	6.81746	7.2159	6.80823	7.29765	6.49601	7.01762	6.79153	7.34469	7.20197	7.01384	7.1282	6.86747	7.03855	6.60719	7.27566	7.04096	6.96114	6.85888	6.26971	7.08136	7.14001	6.69118	6.52205	7.12511	6.85939	7.18582	7.12301	7.33979	7.12714	7.282	7.38763	7.19266
AKR1B1	9.2185	9.58592	10.0094	9.73272	9.68006	9.39486	9.19528	9.1059	9.26205	9.52618	9.14108	9.63323	9.66903	9.90364	8.8111	9.46265	9.3389	9.893	10.3412	9.44989	9.93973	9.64975	9.42906	9.61982	10.2522	9.54803	9.65586	9.60179	9.41244	9.32998	9.31285	9.4476	9.48531	9.46265	9.71494	10.1155	9.35465	9.95629	9.36892	9.00444	10.5312	9.59583	10.1413	9.86438	9.66903	9.91972	10.0284	9.82812	10.0488
AKR1B10	4.96085	0.897003	4.29276	4.30272	4.67222	3.32282	4.28582	3.39368	2.66072	3.06708	4.19237	4.12897	3.53036	4.73272	1.54365	4.0961	1.91925	3.88636	4.33183	2.6369	4.53528	3.65369	4.17846	2.33519	3.90996	3.66146	-0.633246	4.10508	2.02987	3.55006	3.74548	4.09565	-0.847811	2.4971	4.28873	4.08079	3.27351	3.36977	3.32458	2.32418	3.23531	3.54346	3.87915	3.24161	3.05417	3.06044	4.40864	3.76657	3.86479
AKR1C1	7.63121	6.38579	6.21087	6.45577	7.2204	6.28501	6.41234	6.65986	6.67188	6.4972	6.74138	6.07733	7.3098	6.57615	6.73949	6.7484	7.38478	7.36624	5.75214	7.42034	6.20227	7.33481	7.70221	7.14935	7.22298	7.04476	6.76433	6.72705	6.56699	6.9981	6.69671	6.54345	6.48996	7.07691	6.1675	7.18811	6.659	8.11776	6.882	7.01971	6.98964	6.55247	7.30199	6.9129	7.48197	7.4958	6.89488	8.0136	7.1886
AKR1C3	7.72421	6.72058	6.77573	6.96681	7.52426	6.86281	6.8725	7.04608	7.07691	6.41837	6.94903	6.36608	7.41306	6.6637	6.68774	7.29923	7.86731	7.14713	6.65606	7.63619	6.49519	7.92394	7.1722	7.29084	7.69723	7.61254	7.44988	6.90473	6.84125	7.20354	7.20434	7.03804	7.30027	7.15332	6.22529	7.27115	7.60003	8.59601	7.39791	6.87561	6.73827	7.65139	7.65359	7.61134	7.68814	7.16335	7.2512	7.75825	7.5213
AKR1C4	4.10967	0.542348	1.35686	1.27692	3.98964	0.792337	1.00302	0.960564	1.35962	3.57109	2.22971	4.12996	0.210941	2.25841	1.42615	2.62693	1.63559	1.44278	1.34878	1.17722	0.60871	3.38446	1.72718	1.54079	1.63674	0.75996	3.51767	3.18372	1.93674	3.03423	0.355709	2.51153	2.97781	3.262	0.83516	3.47209	1.09768	3.91891	2.43221	0.312953	3.16269	0.424771	0.413482	3.27914	2.55305	0.448744	2.64809	3.62392	3.38108
AKR1D1	1.174	3.34313	3.68998	1.51297	0.618956	2.92241	2.96263	1.14354	2.56385	3.9701	3.06109	2.86671	0.874871	0.706123	1.6979	2.39332	1.5375	2.81247	1.69301	1.23628	2.71776	1.80265	1.9126	1.64958	1.72602	1.92492	2.70417	2.94162	-0.31048	3.14385	3.20008	2.7519	2.59863	2.85016	3.00332	3.67294	2.99029	2.90027	2.88211	3.36434	2.8245	2.96395	2.77734	2.6504	2.91121	2.8271	3.13216	-0.426546	1.00949
AKR1E2	2.22599	1.34017	2.00418	-0.101176	3.43	1.6645	1.70635	0.208581	3.15566	2.17859	1.32571	1.15796	1.66622	1.85854	1.3822	1.58792	2.06921	3.1569	3.52591	1.06541	1.40664	1.77002	0.858052	1.74442	2.5143	1.64113	1.71473	1.71909	1.73615	3.54346	1.78098	3.62605	1.70506	1.76062	1.72231	6.01198	1.72425	1.72363	1.73869	4.01824	1.7401	1.72846	3.86845	1.89125	2.99712	3.47152	1.71909	3.03061	1.69682
AKR7A2	7.87652	7.94598	8.06093	8.17139	7.95028	7.78546	8.04369	8.25483	7.69386	7.96814	7.95278	7.85505	7.59654	7.62876	8.04092	7.42803	7.41531	7.77903	8.07661	8.06756	7.65025	7.99064	7.36905	8.10458	8.10281	7.95491	7.74581	7.82484	7.54775	7.67535	7.44115	7.68814	7.62189	7.821	7.83061	8.03781	7.77404	7.80903	7.37883	7.0576	7.59654	7.86648	8.30073	7.85077	8.04369	7.83481	7.70803	7.7973	7.60145
AKR7A3	5.14594	5.62083	5.94993	6.05162	5.67358	6.30883	5.36686	5.67222	5.44826	6.27078	6.11646	6.43009	5.34087	4.89764	6.09735	5.14678	5.43299	5.10986	5.93574	5.76132	5.83331	5.97449	5.48578	6.4213	4.84613	5.33914	5.922	5.96619	4.82636	5.58209	5.09828	6.21985	4.54212	5.5624	5.84447	6.24154	6.01791	6.20987	4.76288	4.84783	6.1435	5.70928	6.36533	6.22568	5.65273	6.29689	6.00072	6.25552	5.46723
AKT1	6.74539	7.54109	7.68746	7.75006	7.15471	7.43764	7.36031	7.90023	7.51654	7.36791	7.26946	7.6168	7.61548	7.22348	7.36031	7.73577	6.88898	7.24632	7.56515	6.90428	7.06354	6.74757	7.10938	7.25427	8.03697	7.42034	7.15093	7.43941	7.72971	7.27115	7.40211	7.47241	7.28746	7.44467	7.75549	7.39445	7.53402	7.01803	7.5467	7.52426	7.99543	7.44579	7.73292	7.68353	7.79602	7.69723	7.65542	8.32279	8.52298
AKT1S1	3.79702	4.84372	3.6819	6.04034	3.50422	5.26447	4.34647	5.1116	3.8007	5.03736	4.10921	5.71283	4.10144	5.73211	4.79364	4.64702	4.09915	4.6843	4.07182	4.62072	4.04436	3.85027	3.54498	5.01695	5.47537	3.83022	4.64338	4.90659	3.63525	2.41767	3.80919	5.45234	2.80833	4.61987	5.30907	1.82171	5.14087	5.2278	3.64936	5.24211	4.85684	5.16046	5.35913	1.7186	5.52624	3.88153	5.78232	6.1474	5.86879
AKT2	5.58242	6.02552	6.01606	6.2297	5.74479	6.30567	5.50451	6.29761	6.02416	6.01828	5.93419	5.72049	5.5854	6.04511	6.09808	5.60677	5.59993	5.71384	5.91725	5.87166	6.23851	5.41485	5.57344	5.75558	6.34331	6.01791	6.16517	5.88796	5.92613	6.02552	6.32622	6.26169	5.50899	5.84126	5.94854	5.64265	6.29304	5.69798	5.96249	6.25625	6.63263	5.88081	6.05477	5.652	6.02806	5.68267	5.93107	6.00146	5.78052
AKT3	5.65737	5.11805	5.58078	5.09078	5.68305	5.44366	5.40459	5.13281	5.50338	5.50678	5.8166	5.69693	5.7489	5.90296	5.21733	5.49635	5.42862	5.41153	5.00941	5.24817	5.3913	5.83157	5.89898	5.31452	5.62118	5.54725	5.39232	5.10021	5.55342	5.34171	5.62288	5.33071	5.34326	5.23171	5.24741	5.25181	5.07252	5.60506	5.73388	5.68937	5.44789	5.43749	5.56124	5.51632	5.28059	5.28059	5.0962	5.22545	5.42115
AKTIP	7.88991	7.87273	7.56399	7.45288	8.04603	7.80542	7.57387	7.55518	7.97212	7.87507	8.05322	8.30073	8.19143	8.04175	7.48981	8.00151	7.56576	8.51012	8.30557	7.84797	8.00003	8.0928	8.2895	7.51293	8.22487	7.97051	8.13396	8.16169	8.10051	8.16346	8.33373	8.13486	8.32596	8.07256	8.26979	7.98174	8.12798	8.14087	8.20253	8.12243	7.93877	7.85711	7.74445	7.60638	8.12979	7.93099	7.83481	7.98729	7.88329
ALAD	6.81705	6.85843	7.73366	7.53121	7.56634	7.79925	7.66533	7.47448	7.23507	7.34029	7.53991	7.75414	7.4931	8.12979	7.86575	7.36203	7.7912	7.39206	7.28851	7.17363	8.50653	7.79044	7.17741	7.7776	7.14664	6.6581	7.56576	7.59409	7.44884	7.5494	8.34579	6.9143	7.48255	7.66478	7.58609	7.58413	6.98751	7.49914	7.4612	7.45046	7.64068	7.40738	7.51411	7.31412	7.06848	8.04175	7.81836	6.88565	7.45751
ALAS1	8.59102	9.00121	8.96928	9.15271	9.28006	9.35729	8.96748	8.83301	8.9299	9.02652	8.90439	8.90134	9.44989	9.36412	8.81962	9.15271	8.51791	8.88868	8.90937	9.18891	9.31711	9.4339	8.99139	9.19749	9.48786	9.11665	8.96928	9.48786	9.5111	9.17573	9.23368	9.35019	9.31057	9.19749	9.35465	8.90439	9.02314	8.32384	8.95677	8.85989	9.39031	9.23127	9.04274	9.50381	9.03189	9.10755	9.34121	9.20384	9.60425
ALAS2	0.713763	0.115628	0.780779	1.44529	1.62652	0.644726	3.12449	3.4755	1.86281	3.37256	0.0385103	1.532	2.62801	1.46345	1.10681	0.248132	1.41765	1.29565	0.959293	1.49327	0.560386	2.29982	0.939131	0.910741	3.3747	1.42509	2.38153	1.24445	3.02568	1.30275	1.32571	1.35236	1.24772	1.3006	1.25728	1.48791	1.25924	5.07056	1.28667	1.29565	1.2805	1.28111	3.76802	2.80228	1.29832	1.4036	1.26091	1.25211	1.25564
ALB	1.26929	1.30933	0.622775	1.7419	1.19304	1.72718	1.17073	1.84346	1.78243	2.71274	1.46503	2.86082	1.3033	2.90718	2.04976	2.2072	1.35193	1.55096	1.61127	1.00827	2.46933	2.21689	1.8947	1.44278	1.61079	1.65531	2.38967	3.08829	0.627871	2.86082	3.48697	3.06708	0.622775	2.85984	2.76983	3.08567	0.618956	1.73554	3.04255	0.648128	2.9539	2.83202	2.3174	3.3038	1.68614	3.44258	2.42728	2.91467	2.70102
ALCAM	6.25074	5.80828	5.43144	6.16675	5.53753	4.80536	5.49091	5.77731	5.56452	6.16404	4.2779	4.91238	4.94354	5.14594	5.79157	5.89825	6.7771	4.95913	5.36068	6.23455	4.16914	5.91851	5.79185	5.19113	4.76288	6.18114	5.52991	5.5141	4.79923	5.21206	5.71214	5.57127	5.75327	5.40644	5.53285	6.82441	5.97591	6.55987	6.61431	5.55623	6.45092	4.91238	4.96045	6.407	6.53611	6.02074	4.63252	5.05206	4.94953
ALDH16A1	4.1887	5.06042	4.85231	4.81597	3.10077	5.39353	3.76549	5.46646	3.78534	3.97752	4.31932	4.73272	4.61064	5.39792	5.45792	3.75149	4.62912	4.06963	5.34439	4.54125	3.94742	4.09656	4.42673	5.16273	4.61311	4.51706	4.80464	4.22285	3.429	3.73578	4.50545	4.2412	4.62951	4.42036	3.97561	3.39139	4.96602	5.07502	5.16046	4.99335	4.6179	4.67179	5.18106	5.57058	5.01941	3.76859	5.25736	5.82872	4.89
ALDH18A1	5.93179	5.76096	5.75675	5.85312	5.692	5.89337	5.35621	5.69902	5.50827	6.10489	5.33743	5.0279	5.45013	6.12256	4.95781	6.06001	6.16174	5.74335	5.68664	5.85045	5.72376	5.0962	6.40491	5.71384	5.89065	5.3869	4.8527	5.74369	6.07465	5.39353	5.70638	5.4093	5.85617	5.26088	5.52589	5.19268	5.02552	5.15322	5.6054	6.10085	5.01143	5.28916	5.25446	5.528	5.3913	5.28685	5.12464	5.52991	6.55908
ALDH1A1	5.97735	5.96829	4.06921	5.06821	5.44567	5.0123	4.8727	4.51324	4.57951	4.98732	6.12395	6.08061	4.42967	5.21987	4.70846	4.85426	6.72969	6.28617	4.44756	4.7826	5.60911	5.74798	5.27112	5.14523	5.1841	5.32318	4.85763	5.75926	5.42696	4.69802	4.76008	6.30064	5.47353	6.0306	5.23315	5.01774	5.1153	5.98101	5.91654	5.68334	5.69273	5.13131	4.50386	5.40459	5.98496	5.76718	5.95803	6.27898	6.83143
ALDH1A2	2.76568	2.78253	0.339036	1.83092	3.21502	1.50874	1.62477	1.95462	0.834431	2.25967	3.05217	2.20597	2.12829	0.874871	0.429584	3.78032	0.688757	1.03864	0.804956	1.40459	1.71473	2.20597	2.80833	0.96243	3.2911	1.7678	1.93961	2.45453	1.96638	2.01402	2.00751	2.05681	1.91925	1.99033	1.93019	2.34329	1.95788	1.95462	1.95871	1.96141	1.96544	1.9281	2.00418	2.14936	5.33883	2.15082	1.93766	1.93019	4.72411
ALDH1A3	4.29731	2.70526	3.67785	1.88527	3.83406	3.98414	4.05688	3.67343	3.31127	1.79177	3.30018	1.74504	3.17461	4.2065	3.54072	3.43156	3.78687	4.84988	4.7269	3.6744	3.27666	3.48869	4.54648	3.89469	4.2783	3.62931	3.30568	3.56383	4.4155	4.32936	3.46921	4.04816	3.0637	3.61227	2.98496	4.48239	4.86024	3.79899	3.7285	4.20926	3.07663	3.41222	3.73001	3.67294	2.21022	3.93163	3.78189	4.25649	4.92384
ALDH1B1	4.35558	5.37281	5.26869	5.38113	5.0366	5.04582	5.06577	5.17919	5.14959	5.73709	4.79447	5.68971	4.98055	5.99226	5.98456	5.36435	4.74018	4.98691	5.1904	5.17426	5.55185	5.11379	5.81513	5.40009	5.49602	4.89524	5.06206	5.0123	5.23645	4.86764	4.11198	5.61184	5.09313	4.94511	5.10835	5.57908	5.40315	5.55112	4.75444	4.79287	4.86571	5.15175	4.95913	4.06777	5.12507	4.58869	4.75928	5.58651	5.36654
ALDH1L1	4.91731	5.66207	5.01506	6.25951	4.88648	6.42591	6.05129	5.84054	6.32023	6.42088	5.55556	6.04951	5.38799	5.75214	5.49338	5.09671	4.8559	5.64602	6.31517	4.62835	5.62675	5.28059	4.93142	5.70017	5.53498	6.34254	5.51701	5.74085	6.20665	4.98127	5.30623	6.0991	5.74798	4.73059	6.32023	5.95264	5.36145	5.03781	4.53652	5.03572	6.21985	5.2305	5.76718	5.33561	5.85711	6.13791	4.31219	5.46723	6.1831
ALDH1L2	3.40708	3.28016	1.74504	2.59118	1.34929	3.86127	3.01495	2.50814	1.90832	3.53657	2.08354	4.09052	1.60909	3.68549	2.40115	1.70145	4.78668	2.76078	2.6369	4.12808	0.766886	3.81701	3.74151	1.52552	2.05302	2.73894	2.98874	1.23898	3.41732	1.2972	1.31885	2.33269	3.43936	1.29263	1.2505	1.4806	3.83318	2.19673	1.2805	3.33908	1.27432	2.78093	3.14816	3.34661	3.85502	1.39597	2.49981	2.5415	3.43345
ALDH2	10.4035	10.5605	10.5605	9.88579	10.5434	10.5913	10.2876	10.1984	10.2157	10.6234	10.4659	10.4602	10.471	10.4828	10.2483	10.3621	10.1361	10.3878	10.2296	10.145	10.5981	10.4349	9.69352	10.2824	10.4659	10.4079	10.2342	10.5981	10.5312	10.6234	10.525	10.4544	10.5312	10.189	10.4496	10.2824	10.0993	9.98434	10.4544	10.0835	10.5913	10.2389	9.94912	10.0568	10.4079	10.3524	10.4948	10.4544	10.3621
ALDH3A1	3.22503	3.33962	2.92764	0.794646	1.91734	4.04593	2.9231	3.48869	1.07504	4.14554	1.84532	1.29937	3.19634	1.18152	3.08499	1.64232	1.82096	4.15697	3.71135	3.14816	1.78849	2.41163	2.08054	3.15871	2.13561	1.90739	4.37603	3.32834	2.08706	2.87896	0.961802	0.965023	3.40161	3.76004	2.25199	4.07233	3.9407	2.86671	2.57313	0.9259	0.912724	3.04336	2.1854	1.04717	3.06708	2.88855	3.68404	0.879837	3.99533
ALDH3A2	8.09628	7.76084	7.97458	7.7762	7.52014	7.48876	7.9542	7.90898	7.61481	7.36624	7.42691	7.6188	8.24654	8.09196	7.4863	8.12312	7.99219	7.75825	8.10692	7.92244	7.63876	7.44703	8.26891	7.92876	7.63007	7.39849	7.5782	7.66336	7.51475	7.50141	8.04603	7.77282	7.77156	7.60003	7.4809	7.07226	7.76289	7.8543	7.61301	8.25862	7.67459	7.87722	7.70974	7.82484	7.78964	7.68353	7.84454	7.85711	8.10531
ALDH3B1	4.09518	5.2634	4.75733	5.4553	4.75608	5.13612	4.41911	5.41081	4.15168	5.23765	4.533	5.17637	4.89441	5.78694	4.89794	4.6449	5.58045	5.07654	5.02961	5.75024	4.58693	4.6808	4.73688	5.17637	4.5227	5.05882	5.00266	5.35444	4.76976	4.95241	4.61636	4.90854	5.0788	5.01348	5.56382	2.93292	4.91287	4.10699	5.1536	5.43443	5.47994	5.39905	4.79873	4.92659	5.52553	5.19819	5.78936	5.26905	5.3822
ALDH3B2	1.62069	1.16294	1.8247	1.26722	1.05243	2.01983	1.03514	1.17513	1.65358	1.78519	0.901351	0.987897	0.0789757	1.83605	1.08249	1.5874	1.41111	0.844961	0.133683	0.868692	0.909858	0.961802	1.26144	1.07254	0.162322	1.34246	1.59614	1.59496	2.52814	1.64791	1.6623	1.69621	1.58955	1.64113	1.60206	1.868	1.59445	1.61305	1.62652	1.62986	1.61714	1.61422	1.65658	1.75451	1.62477	1.75582	1.60146	4.03024	1.58628
ALDH4A1	5.74542	6.87015	5.31893	6.52926	5.46457	6.05855	5.03445	6.8729	4.96781	6.47366	5.26553	5.56002	4.83848	6.02881	5.12006	5.63244	4.33052	6.17617	6.01009	4.99829	5.86271	5.03322	4.69396	6.41078	6.28052	5.28956	5.45663	5.72814	5.79853	5.12427	4.39698	5.769	4.23396	5.14678	5.64565	4.06442	5.89929	5.16956	5.03138	5.27084	5.58805	5.93503	6.02416	5.44899	5.74198	3.67343	5.60849	5.32886	6.69671
ALDH5A1	6.05297	6.61702	6.88863	6.57162	6.831	6.73006	7.03515	6.60274	6.42267	6.5607	6.66479	6.32622	6.22856	6.85453	5.69761	6.41335	5.42154	6.27349	6.63741	5.71246	6.58996	6.40303	6.45732	6.88738	6.69759	6.96931	5.80929	6.83866	6.6342	6.56699	6.33306	6.80995	5.84616	6.70463	6.92874	6.45965	6.17881	5.82171	5.7427	5.31748	6.02552	6.27797	6.34487	6.55167	6.19667	6.69714	6.43204	6.36692	6.18149
ALDH6A1	7.7568	7.87652	7.6693	7.44988	7.71801	7.70221	7.97458	7.62749	7.91857	7.71456	7.84226	7.52677	7.96497	7.89515	7.22654	7.64126	7.16049	7.58348	7.91434	7.16238	7.33275	7.40621	7.56893	7.35847	7.77013	7.97373	7.78197	7.74265	7.88154	7.1802	8.01739	7.40022	7.84095	7.84095	7.64579	7.62254	7.61744	7.08474	7.51348	7.37883	7.45888	7.43101	7.13212	7.12017	7.58667	7.32393	7.26257	7.06618	7.51105
ALDH7A1	6.48644	6.85453	6.45542	6.95569	7.17019	7.30135	6.67314	6.50912	6.99273	7.29975	7.09297	7.22551	6.57496	7.04828	6.24736	7.12252	6.3206	7.10134	6.60766	6.41584	7.5494	6.79404	6.80917	6.68816	7.63305	7.05232	7.02518	7.42235	6.82485	7.08561	6.38579	7.27115	6.54025	7.09991	7.4931	6.5335	6.45295	6.60766	6.77843	6.50092	7.10407	6.77315	6.91695	6.67002	7.27992	6.88245	7.07691	7.33374	6.8149
ALDH8A1	3.58925	2.95069	3.72583	4.43094	3.08567	2.60661	1.44529	0.880586	2.7931	3.4564	1.56693	3.46758	3.28685	3.79234	2.92833	2.51759	3.23673	3.28801	1.18304	1.7754	2.05206	3.14385	1.85759	1.7796	2.88635	1.54476	1.41765	2.5619	3.49754	2.89555	2.15317	2.8804	2.64184	3.0397	3.05707	3.18751	0.434087	3.86683	0.42284	0.43619	3.73365	3.31963	3.06109	2.62063	3.32768	2.14231	3.37203	1.76312	3.10077
ALDH9A1	9.25327	9.2971	9.55815	9.6128	9.2971	9.49895	9.1059	9.3879	9.47035	9.6525	8.99139	9.13713	9.27325	9.38507	9.31711	9.42208	9.08576	9.2423	9.36624	9.04274	9.31285	9.22901	9.57074	9.51695	9.04465	8.96414	8.91563	9.25726	9.31285	9.2924	9.72754	9.27775	9.36206	9.31057	8.99551	9.39988	9.02652	8.8966	9.28414	9.38268	9.3481	9.25559	9.30827	9.32314	9.16639	9.35019	9.46779	9.19972	9.38034
ALDOA	10.1155	10.6601	10.4239	10.5676	10.2111	10.4659	10.3878	10.471	10.0284	10.3412	10.1316	10.3621	10.383	10.6754	10.4126	9.93973	10.2241	10.1583	10.399	10.4239	10.4496	10.471	9.74407	10.7886	10.383	10.3208	10.2876	10.3255	10.653	10.5124	10.3109	10.439	10.4544	10.4544	10.5124	10.1361	10.5062	10.2522	10.1237	10.1116	10.399	10.2483	10.4948	10.4496	10.5676	10.5312	10.4772	10.3938	10.4349
ALDOAP2	0.552429	2.16399	1.10905	1.62237	0.0237902	3.64014	0.132607	1.4806	1.5124	0.43619	0.122628	3.41793	2.29719	1.38504	0.215381	1.59733	0.881286	1.15476	1.53154	0.986115	1.5082	1.69682	1.41948	1.75115	2.5426	1.76435	1.58519	1.58336	1.6032	1.6384	2.91673	1.68614	1.57896	1.63142	1.59194	1.85202	1.58398	1.60206	1.61422	1.61894	1.60562	1.60261	1.64618	3.63472	4.27524	2.79784	2.00196	1.58173	3.68404
ALDOB	3.03423	3.65413	3.73258	3.06044	2.07515	3.16709	3.85459	4.00468	3.32345	3.82813	3.04031	3.81746	1.70635	3.19517	1.40559	3.7041	2.10478	3.8007	2.27953	2.51643	2.9476	3.70985	3.83905	4.10879	3.03713	3.67391	3.03775	2.414	3.35507	3.17257	2.80889	2.77734	2.16525	3.44753	2.41767	0.793956	3.17532	2.93935	3.35105	2.0174	3.92876	3.50578	3.39534	4.36362	3.40765	3.99846	3.38497	3.47833	2.62063
ALDOC	9.13282	8.93654	9.00121	8.8452	9.51695	9.56819	8.88074	8.68449	8.6829	9.36206	9.28818	9.18214	8.9237	8.93654	7.90832	8.89024	8.55229	9.11665	8.11353	9.54229	8.96049	9.59873	8.16092	9.37834	9.06105	9.26645	9.01258	9.65854	9.57591	9.37834	8.9299	9.36624	9.0803	8.59204	9.71829	8.56974	9.28972	8.52657	9.35465	8.8391	9.68266	8.8842	9.14689	8.7763	9.91972	9.70288	9.63097	10.1316	9.87338
ALG1	4.37695	5.07996	4.90659	1.33489	2.37296	1.60261	4.62026	5.10322	1.49509	1.63085	5.03781	4.26494	3.46977	4.77558	4.03308	4.41765	3.9711	3.47152	4.82765	3.21502	3.0214	4.2892	4.84214	4.27879	4.14463	3.37256	3.66393	5.40085	4.98978	3.08567	0.638994	2.68016	3.63756	3.83406	4.2844	4.33591	2.79051	3.24537	2.91913	0.611275	3.95075	4.68985	0.686734	0.733118	4.37421	3.69634	5.06784	1.55159	4.58114
ALG10B	4.69234	5.11305	4.56464	4.57999	5.17919	5.33283	4.94555	4.9728	4.6538	4.77755	5.0593	5.35256	4.63838	5.00784	4.68122	5.1904	5.02353	5.24326	4.50723	4.71017	4.86197	5.10911	5.1815	5.17845	4.67439	4.75687	4.89398	5.36405	4.88917	5.10397	4.94396	4.54384	4.65866	4.80384	4.95913	4.56425	5.37713	4.37516	5.02657	4.76288	4.6368	4.79401	4.38709	4.52525	4.43409	4.53041	3.61753	4.41041	4.39528
ALG11	7.14566	7.33979	6.8721	7.11174	6.95662	7.19596	7.18125	7.42567	7.16639	7.45232	7.24741	7.47856	7.08187	7.07226	6.55987	7.3745	6.79972	7.15375	6.77888	7.0666	6.83013	7.24219	7.4931	7.03612	7.03462	7.25677	7.11628	7.1649	7.17363	6.87473	7.49418	7.11087	7.45397	7.53243	6.93821	7.06949	7.087	6.94128	7.3136	7.41306	7.29084	7.3431	6.9348	7.13421	7.01665	7.0546	7.06029	6.83535	7.07884
ALG12	3.33075	3.44973	2.97917	1.21982	2.59642	4.13582	2.22052	2.07291	3.92126	3.77347	0.582872	1.62424	0.0107553	2.08842	1.36152	3.22808	3.23799	3.706	3.70943	2.57944	3.19086	2.87196	1.49901	2.77168	3.76496	2.84615	2.14672	2.12171	3.39183	2.20219	5.04732	2.22456	2.09974	2.16525	2.11126	2.44781	2.15683	2.13561	4.71218	2.13962	2.14672	2.12031	5.25704	4.20331	4.84861	2.29045	2.10995	4.48741	4.40907
ALG13	5.97523	6.08396	6.05329	5.98496	5.76309	5.82413	5.74402	5.88115	5.52513	5.87795	5.70154	5.52402	5.49602	5.97236	6.08348	6.06688	5.67692	5.7053	5.51668	5.5906	5.63782	6.33343	5.84968	5.55722	5.44366	5.66424	5.75102	5.65556	6.12928	5.59338	6.1157	5.32318	5.88382	5.82805	5.64094	5.65341	5.58651	6.00608	5.71067	6.1247	5.11805	5.7462	5.73576	5.81032	5.5049	5.1417	5.2849	5.42115	5.44789
ALG14	6.38658	6.668	5.85489	6.72794	6.19885	6.30136	5.71454	6.10085	6.36302	6.15721	6.43204	6.35203	6.24996	6.51971	6.29941	6.36154	6.06688	6.62742	6.33269	6.51024	5.86949	6.19359	6.79715	6.18245	6.52284	6.07211	6.52284	6.64925	6.5155	6.73949	6.68601	6.57454	6.73284	6.29725	6.35122	6.00349	6.88698	6.1005	6.77616	7.00893	6.2533	6.30493	5.93681	5.70928	6.18219	5.94416	6.43084	6.52889	6.44442
ALG2	6.14161	5.89065	6.39006	6.55167	6.37751	6.31633	6.08095	6.12506	6.37751	6.64214	6.37478	6.33231	6.38803	5.83304	5.97769	6.43634	6.12889	6.407	6.75441	5.94454	6.40998	6.65386	6.39006	6.08204	6.19425	6.94991	6.60923	6.31137	6.6059	6.64925	6.51024	6.12001	6.63192	6.27713	6.42629	6.99176	6.47045	6.57205	6.51235	6.4389	6.43938	6.03093	6.26856	6.28577	6.4856	6.50519	6.00685	6.10794	5.97769
ALG3	4.03558	5.79853	5.78936	4.61064	5.42115	5.40238	4.90929	5.32353	5.10727	5.15966	4.71258	5.08883	5.39023	5.18962	4.58827	5.1666	5.76424	5.12123	5.89686	6.39481	6.08818	5.39677	4.90814	5.72339	5.8828	5.68228	5.5141	6.06257	5.46386	1.05476	5.11019	6.08913	5.73743	5.76344	5.92927	5.3913	5.41552	5.98856	4.9629	5.78936	5.57344	6.23501	6.73787	5.68874	6.55095	6.56625	6.6581	6.8208	6.2533
ALG5	6.53769	6.07577	6.3319	6.33159	6.26169	6.18149	6.19106	6.13556	6.47821	6.12506	6.28984	6.1435	6.53737	6.27114	6.42267	6.83535	6.5943	6.1918	6.36728	6.83998	5.92896	6.26971	6.74713	6.35162	6.1247	6.65773	6.4278	6.33269	6.27267	6.57496	6.33793	6.2191	6.31243	6.44676	6.12001	6.78	6.52117	6.70506	6.28125	6.13673	6.19743	6.31824	7.18279	6.66407	6.95248	6.89748	6.31283	6.66407	6.34727
ALG6	5.19616	6.29021	5.39423	5.1228	5.2876	5.87795	4.75887	5.61013	5.01272	5.30247	5.11419	5.71553	5.16729	5.6054	6.00315	5.43963	6.8187	5.56669	4.8948	4.6258	4.8377	6.01679	6.89705	5.32353	5.84579	5.50718	5.52882	5.66462	5.68192	6.02655	6.06549	5.76236	5.41268	5.23385	5.59858	0.622775	5.87488	5.93609	6.16517	5.71553	5.34054	5.32633	5.59858	0.563299	5.78052	5.71628	5.80958	5.71179	5.76936
ALG8	6.3619	6.7275	6.78095	6.55481	6.88517	6.75658	6.80024	6.65006	6.69204	6.67396	6.45851	6.70147	6.76723	7.06702	6.40919	6.90305	7.11584	6.90935	6.95437	6.77083	6.79751	6.85547	7.2896	6.48878	6.9129	7.22868	6.69636	6.72656	7.03804	7.1649	6.91154	7.14896	6.6342	6.76479	6.94809	6.78472	6.54469	6.75658	6.71201	7.24899	7.05068	6.77271	6.6096	7.19545	7.0031	6.98015	7.37563	7.15375	6.90709
ALG9	5.89967	6.13362	6.11495	6.07733	5.80792	5.69728	5.77586	5.59194	6.03024	5.85912	5.97735	5.5569	5.91579	5.91158	6.09097	6.29574	6.1449	5.77556	5.81962	6.00578	5.652	5.63879	6.17155	6.00349	6.16714	6.50206	5.88695	5.53285	6.22495	5.79322	6.24247	6.06034	6.01421	5.84086	5.69541	6.54104	5.70638	5.56803	6.32747	6.04695	5.88382	6.04613	6.00146	5.76096	5.94679	5.76683	5.9654	6.04473	5.90599
ALK	2.901	1.40459	3.55598	3.54692	3.9452	2.47157	1.80778	3.45354	0.797129	2.08354	3.38658	1.95462	2.64087	2.97917	2.79469	3.31642	3.13566	4.05596	2.85531	2.20597	3.04177	3.39919	3.63039	2.86747	2.03221	1.7118	3.5511	3.39073	3.03061	4.28957	2.96615	3.76095	3.95695	3.89645	4.39614	3.42846	4.03641	4.07335	4.46305	0.75996	2.80574	3.68298	3.62056	3.9551	4.95539	3.28915	2.8271	3.83406	4.09156
ALKBH1	5.95631	6.1175	6.98964	5.81134	6.47473	5.82105	6.12364	5.96655	6.65262	6.14415	6.35246	6.03287	6.75489	6.22641	6.79593	6.61471	5.61013	6.04613	6.74949	6.35326	6.448	6.45577	6.55207	5.80546	6.37831	6.689	6.25112	6.53008	6.75201	6.47697	6.65298	6.23543	6.44912	6.5155	6.39558	6.51884	6.84548	6.31633	6.54736	6.33159	6.44174	6.27576	5.78976	6.60457	6.39006	6.46915	6.66718	6.48922	6.21949
ALKBH2	5.99583	5.69649	6.24707	5.78267	5.97769	5.78936	5.20455	5.52689	5.66462	6.10666	6.07658	6.00608	5.64501	5.56559	5.92896	5.80341	5.54317	5.96327	5.14959	5.65481	5.85881	6.15872	5.84692	5.68558	4.61354	5.70086	6.3236	5.83508	5.32517	5.69577	5.4788	5.89097	5.57979	5.73211	5.79823	5.44185	5.99695	6.12928	5.99866	5.10513	6.30984	5.78491	6.3308	6.50166	6.3301	6.22856	5.55446	6.70375	5.95844
ALKBH3	5.65447	5.95489	5.78096	5.75558	6.15487	5.70488	5.31558	5.8141	6.03823	5.63342	5.87828	6.07315	5.71384	5.56771	5.54883	5.73135	5.69798	5.67846	5.78587	5.93645	5.84548	5.86765	5.98137	5.92123	5.67952	5.66353	5.97994	5.98744	5.61013	5.45117	4.93184	5.98313	6.05093	5.89757	5.86765	5.81482	6.01315	6.04438	5.7922	6.06136	6.23197	6.27828	6.12256	6.19638	5.95768	6.28536	6.35562	5.83833	5.94679
ALKBH4	4.42574	4.83536	3.43614	4.77558	4.78347	4.50301	4.61103	4.88218	5.00221	5.16581	5.51337	5.41406	5.35293	4.60239	5.30111	4.69396	4.76635	5.12049	5.18106	4.52647	5.81032	4.86406	4.72273	4.79447	5.71591	5.13281	4.94063	4.92468	4.82078	5.02589	5.19654	5.15699	4.36444	4.91982	5.08477	4.85108	4.79623	5.25776	4.92897	4.96085	4.98546	4.95326	5.311	6.03925	5.24891	5.16115	5.52553	5.5049	4.90252
ALKBH5	8.07661	8.51012	8.14629	8.61025	8.32804	8.52298	8.32095	8.58735	7.84723	8.6062	7.86231	8.50321	8.47502	8.8391	7.38763	8.28689	8.04997	8.10125	8.35307	8.06426	8.41236	7.87202	8.1995	7.96656	8.47801	8.53733	8.03879	8.26053	8.28776	8.33956	8.17326	8.15234	7.8923	7.77404	8.20174	8.33188	8.27075	7.8923	8.10794	7.87866	8.53502	8.16346	7.72	7.60215	8.16092	7.9994	8.4791	8.19863	8.30658
ALKBH6	5.45761	6.31243	6.35203	6.4997	6.11495	6.05519	5.9496	6.208	6.35162	6.38734	6.39198	6.54777	6.19704	6.29761	6.18598	5.8228	6.11257	6.19969	6.15487	5.81962	6.85667	6.40226	6.11899	6.31865	6.65341	6.03325	6.86281	6.35933	6.03427	5.7462	6.30064	5.93681	6.21664	6.62656	5.66063	5.86949	6.2832	6.19667	6.04288	6.17371	6.00578	6.20188	6.67358	6.33874	5.73532	6.0788	6.16825	5.81099	5.7489
ALKBH7	6.36116	7.16049	6.93865	7.20036	6.90661	7.27007	6.4589	6.90976	6.59837	7.11431	6.72969	7.03048	6.55058	7.2319	6.37719	7.21635	6.50912	7.42856	7.70221	6.95662	7.0564	7.12968	6.62133	7.918	6.81746	7.00216	7.30199	7.08519	6.34799	6.79841	6.05927	7.00999	6.67956	7.06949	7.16088	6.39675	7.35538	7.67459	6.35562	5.75214	6.82522	7.49257	7.56634	7.48255	7.41975	7.31913	7.37719	7.50726	6.86657
ALKBH8	4.63633	4.49835	4.42121	4.74239	4.82925	4.67272	5.0185	4.38364	4.91682	4.65792	4.84253	4.52396	5.12706	4.39485	4.55444	5.09867	5.0239	4.23795	4.1019	4.48097	4.37421	5.41826	5.19113	4.42804	4.65674	4.45221	5.21872	5.10872	5.43409	4.75123	4.78628	5.23135	4.2097	4.3413	4.82683	4.67179	4.3091	4.26185	4.04816	4.83891	4.36444	4.61024	4.15741	4.3862	3.70311	4.52231	4.25649	4.04488	4.3814
ALLC	4.57908	4.67135	1.5082	4.55806	4.85345	3.96632	1.51994	3.50971	3.46659	4.71093	3.28135	4.44067	4.69759	3.15946	4.21837	4.44154	3.9814	4.41086	2.85663	3.72639	3.65909	3.08097	4.18817	4.46808	3.34256	4.0196	2.4971	3.44365	4.51278	5.44633	2.67352	2.58349	3.12207	3.22863	4.25109	5.09867	3.06229	5.37052	2.62254	5.28844	4.21701	3.47716	4.8377	4.17002	3.12207	5.82486	3.54288	3.9644	3.65995
ALMS1	5.90882	5.98596	5.78628	6.08167	5.85816	6.10122	5.82568	5.93074	5.6447	6.1828	6.22708	6.1591	6.11927	5.4788	6.33269	6.1179	6.01082	5.90639	5.2796	5.70825	5.55144	5.60947	6.25297	5.67692	5.62224	5.93792	5.85816	5.84235	5.5603	5.31783	5.81513	6.17881	6.00941	5.80167	5.49191	5.63275	5.68971	5.71143	5.95768	6.08275	6.2548	6.1045	5.40815	5.74165	5.61327	5.58465	6.1157	5.76132	5.60677
ALOX12	4.31968	4.69882	4.46359	4.45089	5.02315	4.79751	4.49345	2.4732	3.65369	3.20567	4.82212	4.32936	2.56692	4.89908	3.96591	4.54038	4.02182	3.89333	4.37814	4.28391	4.33093	4.15506	4.33052	4.25694	4.25964	3.78093	4.91982	4.49542	3.75948	4.97966	3.83591	4.77096	3.50791	4.2714	5.25556	4.07182	4.55587	5.35484	4.29518	4.41993	4.2452	4.99057	3.8536	3.63702	3.60613	4.30618	4.5088	4.71461	3.57109
ALOX12B	0.85031	0.632566	1.11076	0.208581	2.76647	2.92833	1.12278	0.934659	2.69117	0.845759	1.55218	0.635229	1.69496	1.14118	0.23246	1.14232	0.0385103	1.47581	0.880586	1.66965	0.153121	1.20225	0.0350701	0.812323	0.816539	-0.11836	1.32299	1.30589	1.33378	1.36936	1.38657	1.4172	1.30389	1.3678	1.31719	1.55439	1.32057	1.33856	1.35236	1.35575	1.33686	1.33631	1.39395	1.47745	4.4497	3.06302	1.31825	2.74651	1.31197
ALOX12P2	1.30222	1.15476	1.72107	1.35962	3.5068	1.67661	1.30389	0.258088	1.86981	1.41399	3.17721	-0.101176	1.35292	1.51474	1.01391	1.66622	1.23797	0.763334	1.47581	0.529779	1.53258	0.820283	0.352231	0.355709	0.869368	1.54183	1.36989	1.35236	4.53949	1.41303	1.43277	1.45834	1.35193	1.4101	1.36196	4.32014	1.36485	1.3822	1.39649	1.40018	1.38004	1.38549	1.43004	1.51689	1.39133	1.50097	1.36656	1.35686	3.55979
ALOX15	0.234176	0.136618	3.07866	2.42581	3.02865	1.76312	0.23246	0.183896	1.34129	0.698025	2.19433	1.36242	0.963851	3.00392	2.44142	1.54536	1.72425	3.29355	2.34329	1.34079	0.894878	0.0336335	0.15731	1.90623	1.93875	1.47074	1.30484	1.28667	1.9202	1.34757	1.36936	4.55162	2.26802	2.94837	1.29995	1.53559	2.54034	1.31719	1.32864	1.33631	4.11506	4.19955	2.68518	1.45884	1.33798	1.44383	1.30222	1.29348	2.23329
ALOX15B	4.55237	4.54732	4.19648	3.75403	4.7958	1.54762	4.67179	4.41382	5.09273	4.21313	4.9858	1.05598	3.5582	2.91121	4.43285	2.93139	2.74823	3.78977	4.3219	4.04816	4.44462	4.2122	3.1279	4.10314	4.20279	3.13824	5.08403	4.4366	4.18547	0.677537	4.88452	3.94654	3.81648	2.96114	4.43847	0.879187	4.23088	3.09489	3.67343	3.262	3.77942	4.33006	3.3619	3.24786	4.90177	4.91982	4.49835	3.60613	0.754163
ALOX5	4.70534	4.62197	3.58572	3.80712	4.49297	4.17573	5.10513	5.69077	4.36661	4.72195	4.16502	3.50178	4.25914	3.40656	4.2645	4.36186	6.83652	4.3875	4.96126	4.39271	4.22285	4.2714	4.45313	4.2425	4.36399	4.47107	4.58404	3.9864	4.82487	4.27001	4.9665	5.23605	4.75608	4.85189	4.35813	4.73885	3.46559	5.19857	4.36795	5.288	4.41719	4.19607	4.70803	4.7605	4.24032	4.62154	4.79833	4.00768	4.38364
ALOX5AP	5.76001	4.1859	4.59218	4.45481	5.68971	4.44021	5.98703	6.29648	4.92431	4.80055	4.44462	4.101	4.62748	4.40963	4.63036	4.61604	8.30762	5.01143	5.77003	4.86814	5.00744	4.7625	5.33478	4.37241	4.73688	5.52047	5.57803	4.96902	5.21946	6.09703	3.91238	5.59501	5.68192	5.96286	5.70891	4.94437	5.40168	6.7275	5.57908	3.43055	6.12292	2.50708	6.11215	5.77332	6.10943	5.98274	5.86089	5.50263	4.8105
ALOXE3	1.66807	0.598204	3.33301	0.0855419	2.48184	1.8947	1.47581	0.322491	1.65142	0.9678	3.36036	0.648128	1.88003	1.74124	1.12229	2.24248	1.12509	1.02772	1.74563	1.41443	3.27726	1.24164	1.31355	1.21758	2.05206	1.38822	1.49118	1.94522	1.50765	1.54304	1.56256	3.80712	1.47691	1.532	1.49068	4.75041	1.49509	1.50479	1.52044	1.52501	1.50976	1.50874	1.55439	3.15238	4.02487	4.65339	1.49666	1.49013	1.47691
ALPI	1.34702	2.73894	1.33141	3.83217	1.73495	2.51522	1.6032	1.44937	1.45719	1.50364	1.86981	3.55055	1.47374	3.64014	5.50899	5.1994	5.10097	5.32393	5.55446	5.542	5.57023	5.45894	5.45821	5.70488	5.25035	5.31025	0.139764	0.134567	0.135641	0.133683	0.137795	0.136618	0.130235	0.132607	0.130235	0.173755	0.138676	0.140616	0.137795	0.130235	0.133683	0.140616	0.154631	0.15731	0.137795	0.162322	0.128661	0.132607	0.136618
ALPK1	5.00062	2.6841	4.62835	3.36919	3.91659	4.53163	4.14653	2.80489	3.73112	3.43397	4.47453	4.14839	4.70725	1.57267	3.49461	3.85226	6.67596	4.50839	3.46338	2.63105	3.17951	4.12043	2.93565	3.03713	3.46921	4.02229	4.26091	4.76209	3.51767	2.4732	2.83118	2.66493	3.956	3.7207	2.71683	0.761763	2.90178	3.38329	1.59847	3.41499	3.748	4.45823	2.90323	2.70296	3.56853	3.30318	4.26693	1.77282	3.93829
ALPK2	7.68609	7.69519	8.12075	7.70974	8.00386	8.02472	8.7189	8.10607	8.0136	7.81967	8.44223	7.8153	8.19029	7.87722	8.40121	8.42886	7.44225	8.31902	8.10794	8.34292	8.05933	8.5861	7.12968	7.98174	7.87722	7.94812	8.44396	7.72834	8.33088	7.94746	7.93877	8.04175	8.21083	7.99543	8.54894	8.54437	7.64068	7.63007	7.44646	7.80542	8.13486	8.65934	8.72703	8.58502	7.78546	8.2613	8.37337	7.69969	8.15311
ALPK3	7.2159	6.76391	6.83535	6.40385	6.18733	6.31979	7.66737	7.04976	7.54504	6.49079	6.72656	6.0991	7.40382	7.22447	7.77404	7.27614	5.18223	6.86934	7.33275	7.10083	5.94057	6.70819	6.38144	7.15631	7.28589	6.39866	6.68265	6.20874	6.93308	5.91915	7.03717	5.66986	6.38963	7.40554	7.12065	7.31193	6.42046	5.95658	6.13144	7.18125	6.18245	7.19111	6.4248	7.1504	6.14777	6.69413	6.89705	6.02379	7.15375
ALPL	3.86796	4.02612	3.79234	4.23627	3.88437	4.82803	4.19521	4.86681	4.27265	4.68808	4.07795	4.50254	4.63802	4.79239	5.11305	3.85661	5.12975	3.9156	4.4076	4.11465	4.18916	4.05727	3.78778	4.60981	3.8031	4.17758	4.86571	4.81447	3.73112	4.64739	4.17485	4.58963	3.46338	3.76207	4.06143	5.2876	4.87075	4.64539	3.81202	4.56464	4.80646	3.81933	4.10415	4.48552	3.33852	5.48342	3.9008	4.35062	3.81843
ALPP	1.06836	1.43106	1.19357	1.06664	1.15476	1.20415	1.20474	1.24445	1.1497	1.28614	1.38414	1.26244	1.17121	1.37471	5.12778	4.65422	4.48772	4.9682	4.69396	4.75444	4.93523	4.88371	4.69966	4.86814	5.16581	4.40264	0.139764	0.134567	0.135641	0.133683	0.137795	0.136618	0.130235	0.132607	0.130235	0.173755	0.138676	0.140616	0.137795	0.130235	0.133683	0.140616	0.154631	0.15731	0.137795	0.162322	0.128661	0.132607	0.136618
ALPPL2	3.43936	4.73301	4.64065	4.18113	3.8662	4.9766	3.80457	4.33723	4.60239	3.88058	4.14603	4.69485	3.88343	5.00022	3.92405	3.20764	2.63199	4.12808	5.45013	5.24074	5.65303	4.36943	3.92973	3.63648	5.27884	4.58445	4.83848	5.44222	3.90031	2.19944	4.27001	0.978153	5.1716	5.11882	5.09671	1.13805	4.81023	5.73135	5.03621	5.32015	3.77475	4.79873	0.9956	1.06064	5.1654	1.05068	5.21697	4.99938	4.6657
ALS2	6.09552	5.84862	6.23576	5.82171	6.24042	5.7749	6.29689	5.76683	6.20036	5.60099	6.07577	6.00107	6.30796	5.62971	6.20874	6.28164	5.47322	6.03745	5.80167	6.29725	5.86302	6.04511	6.39407	6.13362	6.08126	5.94454	6.27861	6.06851	6.29343	5.88344	6.36888	6.09871	6.24003	6.43563	6.06068	5.98137	6.02954	5.67464	5.88963	6.31714	6.03784	6.34134	5.71693	5.95768	5.88661	6.26856	5.83157	5.84793	5.63177
ALS2CL	4.31136	5.25326	6.0306	4.04593	4.70846	5.17467	4.83336	5.00302	4.39226	5.56593	5.05621	5.82381	5.14125	5.90441	5.85379	4.97402	4.53163	4.40492	4.67969	5.09153	5.95915	6.0306	4.37603	4.93484	4.79364	5.0919	4.14029	3.956	5.09828	5.37052	4.30962	5.38502	4.4076	4.50839	4.10363	3.19697	4.63292	2.70945	5.35843	5.26634	5.49971	3.82179	5.46134	5.46916	5.64164	5.72743	5.64968	5.73176	5.30907
ALS2CR11	3.71626	2.81743	3.10015	2.61571	4.01874	2.34819	2.81152	3.9711	1.41948	2.15922	3.77347	2.96464	2.00751	1.40315	1.84532	2.02879	4.68384	2.65857	0.86993	3.31234	1.75998	1.46063	3.58823	2.63969	3.5897	3.97291	3.38	3.52492	4.49799	4.01204	3.22304	2.67249	4.02402	2.64184	4.03689	3.95915	4.6046	2.04039	4.83048	3.60341	3.2007	0.643724	2.85358	3.37256	2.49136	3.07381	2.32516	1.24564	0.755112
ALS2CR12	3.82528	3.03643	2.75283	1.72289	3.5744	1.57551	3.50578	3.45526	3.20932	1.04895	3.04791	3.53149	4.59007	3.32521	2.32283	4.43449	1.57486	3.96963	3.68923	1.50765	1.00176	4.43449	3.07249	1.52202	2.54034	2.68614	2.76078	3.53817	2.11759	1.85427	1.87062	1.90927	3.37419	3.55934	1.79993	2.18934	3.19263	4.74417	3.87167	1.8247	1.82408	4.51828	4.25109	5.31309	3.75244	1.99864	1.79652	1.79576	1.77478
ALX1	1.90029	2.85276	3.39139	1.46661	1.57956	1.28317	2.72179	1.59556	2.69997	1.94039	3.32634	2.69117	4.42527	2.227	3.54692	3.88492	3.84105	3.75244	4.03124	3.51183	4.17396	3.80154	3.91469	3.48816	3.55055	4.01348	0.139764	0.134567	0.135641	0.133683	0.137795	0.136618	0.130235	0.132607	0.130235	0.173755	0.138676	0.140616	0.137795	0.130235	0.133683	0.140616	0.154631	0.15731	0.137795	0.162322	0.128661	0.132607	0.136618
ALX3	1.00567	1.6691	4.37333	4.60712	3.90282	1.60974	3.88932	3.28915	3.88008	3.50971	4.58277	2.90178	3.85848	2.87352	4.01824	3.25503	3.41793	3.99717	3.63969	5.79967	3.98594	4.00768	3.06631	3.56324	1.47794	3.22437	3.9407	2.89555	4.0983	2.93429	5.52513	4.61311	1.61606	2.58768	2.47785	5.08477	4.7508	2.05784	3.19456	3.44753	4.54947	3.09549	4.81838	4.04951	4.33052	5.2641	0.909142	5.39062	0.922622
ALX4	3.14001	4.09436	1.15967	1.82704	3.78935	1.40315	0.193624	0.460739	1.62127	1.09664	0.77701	1.36656	0.531488	1.43106	1.3591	1.35628	1.07091	1.66503	1.51946	2.59642	1.90832	0.605982	1.79457	1.18818	1.38822	1.4499	2.48184	1.09831	1.12557	4.35423	1.18152	1.20474	1.10396	4.03872	1.11446	1.33686	2.87813	1.13253	3.16512	1.14873	3.54122	2.78462	1.18509	1.26293	1.15198	1.25823	1.72158	3.93447	2.37662
AMBN	0.888049	1.24214	2.44273	2.58349	0.797129	1.5874	-0.256025	3.6819	0.854958	3.12401	1.57835	4.22328	2.97068	4.51706	2.6369	1.00375	1.77743	1.60028	2.37662	1.2856	1.42417	1.93766	1.57205	1.4499	1.94968	3.0698	3.5582	2.15436	0.899145	0.921301	3.20818	4.26091	0.892337	0.940409	0.881958	1.12117	4.54992	4.21785	0.926593	0.923292	0.908432	3.54449	0.982652	1.04414	0.929688	1.03567	3.8662	2.79126	0.903566
AMBP	1.72107	0.621454	0.96243	2.34329	1.18558	1.01084	2.01163	1.21917	0.733118	0.246364	0.23246	1.71117	1.04831	3.22808	1.85362	0.168474	0.718163	1.27595	0.550619	1.07934	1.429	0.690878	1.08305	0.0545436	1.59847	1.15419	1.45719	1.44237	1.46614	1.50263	1.52406	1.55218	1.43877	2.84772	1.45358	3.3747	1.45313	1.46614	1.48269	1.48469	1.47074	1.47581	1.51743	1.60909	1.48226	3.36036	1.45719	1.44877	1.43877
AMBRA1	4.68891	4.87998	4.72058	5.12392	4.68043	4.61604	4.95829	5.00062	5.13685	4.98978	4.71461	5.41081	4.58742	5.01885	4.4719	4.81924	4.59622	5.07457	5.0919	4.85147	4.54827	4.53782	4.76727	4.7457	5.17764	4.61676	5.0593	4.99938	4.61946	4.41459	4.32728	4.8995	4.39321	4.24487	4.80569	4.9492	5.10322	4.64338	4.6179	4.57682	4.17079	5.18559	4.16732	3.95404	4.48097	3.63648	4.74018	5.02746	4.37462
AMD1	7.16335	8.03072	7.20536	7.98486	7.66138	8.28309	7.61744	7.63493	7.86801	8.02558	7.74265	7.98568	7.19939	7.65416	7.4182	7.69386	7.84226	8.26053	8.00003	7.71318	7.52859	7.81317	7.98568	7.34415	7.48876	8.45297	8.21825	7.7015	7.79464	8.46606	8.01803	7.78485	8.06583	7.98096	8.49227	8.20638	8.20809	8.09366	8.08607	7.61074	7.65359	7.93391	7.27566	7.15143	7.91582	7.81317	8.28192	8.2895	7.70974
AMDHD1	1.61185	3.59286	3.85319	2.68614	2.02193	4.68509	4.25605	1.77072	1.34654	4.10751	1.64175	1.99754	1.76191	5.28881	3.72387	4.13421	3.16009	3.20445	3.262	3.26069	1.77145	3.52804	4.1735	2.48548	4.56632	3.37089	3.72172	4.02229	4.39614	3.53657	2.86971	2.5607	2.37033	4.38007	3.90282	3.77203	1.95462	3.31127	3.77842	4.49675	4.33504	2.3945	1.9183	-0.847811	3.87089	3.92034	2.14936	4.18246	3.86683
AMELX	3.81104	2.93139	3.76657	4.14702	4.2421	2.81152	3.44595	3.89469	3.56079	4.32897	2.97993	4.37282	3.91041	1.43052	3.58417	4.32276	3.31083	3.04791	2.94837	3.64261	3.35006	4.11685	4.09339	3.79746	3.06177	3.48752	4.28095	3.43789	4.15506	3.70254	3.70795	4.45349	3.70148	4.307	3.25329	3.19015	3.80712	3.52544	3.85706	3.49052	4.09102	3.21377	2.18813	3.37147	3.13566	3.53711	3.62787	3.49754	3.02642
AMELY	4.3502	3.79179	3.34888	2.56278	4.729	4.45265	4.61182	2.27586	3.43789	4.32276	0.93034	4.86764	4.9359	3.47495	4.5203	4.01777	3.5338	3.79542	3.2839	3.66451	2.7437	4.2623	3.32165	5.02142	3.61378	4.43056	2.58349	4.58869	3.81015	4.4012	2.97844	4.66652	2.85895	4.73652	4.53652	3.3964	4.22736	3.72481	3.76657	4.68685	3.9883	3.68455	2.32774	3.76207	0.343142	4.17305	4.03603	4.814	3.63145
AMFR	5.19444	5.71907	5.24964	6.07211	5.89861	6.47409	5.96169	6.80455	5.51902	6.3038	5.47461	6.49045	5.06784	5.14886	5.2091	6.04034	6.17079	6.00072	5.74085	5.81513	4.96085	5.27225	5.70993	5.34477	5.81622	5.69871	5.42626	5.63994	6.32747	6.29906	4.7361	5.6098	5.84862	5.67288	5.89301	5.23385	5.34439	5.8746	6.41196	6.22385	5.42079	5.62535	5.90599	5.23765	5.23687	5.64406	5.9133	5.19113	5.93948
AMHR2	3.36615	2.88793	2.73419	2.94233	3.26763	2.16299	2.9765	1.72658	3.51028	2.24248	2.54577	1.89944	2.50465	3.20314	3.98094	4.08505	3.90766	4.08607	4.06101	4.11112	4.07433	4.3875	4.2421	4.05688	4.16502	4.05647	0.139764	0.134567	0.135641	0.133683	0.137795	0.136618	0.130235	0.132607	0.130235	0.173755	0.138676	0.140616	0.137795	0.130235	0.133683	0.140616	0.154631	0.15731	0.137795	0.162322	0.128661	0.132607	0.136618
AMIGO1	5.62808	5.44713	6.49801	5.812	6.34624	6.23345	6.04544	5.6187	6.50675	5.80095	5.97415	6.11927	6.57205	6.08204	6.19359	6.02881	5.57694	6.53479	6.13708	6.48838	6.21575	6.10598	5.61367	6.10701	5.85347	5.92052	5.8402	6.05637	6.15647	6.03165	6.20765	6.02141	5.8724	6.11215	6.28164	6.5691	5.84548	5.61474	6.14889	6.1591	5.972	6.01342	6.28357	6.25036	6.11495	6.20621	6.67122	6.52965	6.12853
AMIGO2	6.83199	6.19926	5.7627	6.17514	6.52715	5.288	5.20755	6.27934	6.07351	5.50979	6.5628	6.27006	5.76309	5.91227	7.53743	5.86659	6.17617	5.58045	5.63913	5.24857	5.79892	6.00287	6.2297	5.63879	6.80279	6.42707	5.97735	5.66026	5.83195	6.11335	6.66598	6.00578	6.55359	6.3597	6.41151	6.6342	6.47473	7.29482	6.91601	6.12967	6.57887	6.10794	6.08505	5.99866	6.2134	6.48299	5.64998	6.50828	6.40028
AMIGO3	4.09251	4.24731	4.4719	4.27048	5.05882	4.16147	4.44628	4.2118	4.79401	4.34091	4.30054	3.85616	4.44112	5.06042	4.92897	4.6179	4.27265	4.6094	4.9322	5.92335	4.56632	4.84013	4.48142	5.03697	4.43752	5.29745	5.0864	4.609	3.93876	4.99466	4.59176	5.02961	3.66837	2.5382	5.1521	3.88783	4.6808	4.46675	2.96191	4.02572	5.25518	4.7508	4.98732	5.53178	4.87807	4.34968	5.36068	5.49091	4.96522
AMMECR1	3.36089	3.81153	3.24537	2.10862	2.43704	2.25689	3.87621	2.82867	2.2772	1.51842	1.49563	3.38276	3.02795	2.50581	4.27398	1.43512	2.54577	0.64949	2.32283	1.35628	4.2023	2.26653	3.30018	2.62998	3.09951	2.2838	2.37662	3.26884	1.45416	1.49068	1.51417	1.54079	1.42748	1.48173	3.50524	1.68548	1.44074	3.38845	1.47168	1.47374	3.91752	3.4547	1.50706	1.59847	1.47019	1.58691	2.54357	1.43782	1.429
AMMECR1L	7.77156	7.17689	6.83235	7.28485	7.46785	7.0874	7.16138	7.0955	6.90177	7.12161	7.30921	6.51884	6.96636	6.66839	7.29651	7.57019	7.16911	7.82484	6.89342	6.95611	7.25333	7.64068	7.59804	7.10407	6.71076	6.94768	7.0162	7.14935	7.61368	7.35235	7.82176	7.47187	7.39206	7.05883	7.36363	7.1731	6.95477	6.81988	7.5534	7.63187	7.24219	7.09457	6.73589	6.83572	7.09194	6.85136	6.80917	6.83013	7.01842
AMN	3.14816	3.03061	3.94742	2.77651	4.76854	3.88437	4.10415	3.26069	4.06394	3.60219	5.35444	3.02073	4.78393	3.60166	4.20926	3.16709	3.28563	3.81153	4.5187	5.38394	4.17305	4.24871	4.21964	4.20804	4.22871	3.72639	3.8662	0.804956	4.57682	3.27666	4.69359	4.35854	4.39614	4.74949	4.66802	4.16019	4.3083	3.45526	4.84414	2.92833	4.06963	4.13464	4.24731	5.42895	3.68874	4.45912	3.97904	3.54692	3.62985
AMN1	6.33905	6.71908	6.1889	6.15144	6.49843	6.45453	6.4274	6.3701	6.5513	6.42707	7.18811	6.38803	6.64493	6.28801	5.53936	6.67549	6.53083	6.77006	6.68982	6.92747	6.09808	6.38734	7.33154	6.52683	6.64649	6.62431	6.7229	6.66065	6.9125	6.76801	7.09351	6.69965	6.78218	6.45656	6.37869	6.28089	6.73747	7.00263	6.84793	6.71587	6.5032	6.39481	6.47473	6.49401	6.71908	6.70656	6.448	6.42046	5.74198
AMOT	3.2516	4.91646	4.57315	5.75926	5.41861	5.35556	4.552	4.85684	5.42419	5.71283	5.1716	6.54967	4.56325	4.78433	4.78936	4.90103	5.64747	4.99466	4.82803	4.64863	5.12427	4.78816	5.32015	6.02489	4.92659	5.04976	5.51482	3.41047	5.2876	5.1815	5.46162	5.31783	4.94994	5.57246	4.23711	5.33524	4.72016	5.88661	4.90618	5.67952	5.04866	5.36405	3.09149	5.7627	5.34017	5.11604	5.10952	5.47701	5.03248
AMOTL1	6.77888	6.22349	6.20439	6.5699	6.54736	6.66557	6.52243	6.44019	7.06564	6.67358	6.26929	6.04769	6.43674	6.34663	7.31913	6.36692	5.25219	6.69118	6.17963	6.4213	6.2961	6.20478	6.407	6.45691	6.12577	5.97101	6.16065	6.30179	6.58716	6.27078	6.76877	6.49478	6.48878	6.18733	6.44879	5.57311	6.20079	5.53216	6.37444	6.8966	6.46238	6.4856	5.19371	4.93021	5.78491	5.78769	6.02185	5.43707	6.45926
AMOTL2	7.71924	7.66993	7.23507	7.58413	7.47799	7.80478	7.62629	7.82176	8.38756	8.19783	7.588	7.99633	8.04837	7.9279	8.52546	7.12415	6.9134	7.84226	6.99326	7.65802	8.51898	7.7568	7.44703	7.55922	7.53743	7.71318	7.87722	7.5782	7.90446	7.71318	7.45046	7.65025	7.63876	8.08307	7.88552	8.14972	7.4182	7.48137	7.57876	7.33428	7.59278	7.4182	7.2512	7.21	6.89086	7.23808	7.19155	7.4893	6.92834
AMPD1	1.36656	4.27481	4.89831	4.11198	3.27296	2.03351	3.37765	0.940952	1.13065	4.49505	1.81069	4.53868	3.72583	3.68923	1.67834	2.43305	3.29778	3.59608	3.45592	1.75115	1.83832	3.58877	3.44753	3.67187	3.31704	2.51522	-0.218295	2.56692	3.72282	4.54827	3.65817	3.94697	3.41163	4.24826	3.15627	3.6154	4.33265	4.12552	3.66601	3.65321	3.11875	3.59554	2.98151	3.39183	2.61293	-0.0732348	3.16074	3.17328	2.23097
AMPD2	5.98274	5.85143	5.32958	5.19158	5.29926	5.2228	4.96085	4.69437	5.28454	5.12778	5.01661	5.16956	5.70488	5.70825	5.34214	5.22132	6.21701	5.18223	5.09904	4.91323	5.48211	5.51668	5.03532	5.10952	5.39973	5.2622	5.58882	5.52189	5.09474	5.00744	5.00181	5.14043	4.95829	5.33602	5.20491	5.38288	5.43113	5.44713	5.34623	5.42762	5.76972	4.90659	5.91986	6.1073	5.26634	5.52153	5.87583	6.05823	5.91507
AMPD3	5.75062	5.16768	5.03736	3.93495	5.80725	5.35843	5.92613	5.66742	5.61474	5.50899	5.38329	4.7508	5.62971	4.7953	4.36399	5.22173	5.45894	5.90096	5.99931	4.99297	6.72969	5.15248	5.54006	5.63813	5.43002	5.31487	5.16768	5.08926	5.43184	6.07733	6.45295	5.2622	5.55867	4.26866	5.70638	4.80569	5.17305	5.40121	5.85281	6.02455	5.74693	4.82487	5.54689	5.16956	4.51246	5.45894	5.63562	5.46681	5.09228
AMPH	5.32591	5.90599	4.86235	6.24083	4.99592	5.40418	4.89873	4.88044	5.91654	6.18245	5.28025	5.71356	4.33265	4.72732	4.81803	5.83047	4.61024	5.01552	4.71849	5.11095	5.67627	5.57377	5.43554	5.33105	5.33811	4.40396	5.75291	5.83682	5.91915	5.27084	4.93837	4.74897	5.03049	5.38329	5.69728	5.73882	5.85347	4.77348	5.27412	5.06862	5.45632	6.43674	5.88182	5.40049	5.44185	5.13898	4.47282	4.5046	5.34132
AMT	8.06021	7.86648	8.08161	7.39392	8.03879	7.82989	8.29519	7.82562	8.2971	7.84302	8.33088	7.97458	7.91284	8.16838	8.38244	7.63364	6.78664	7.6168	7.68079	7.56038	7.75276	7.9729	7.5431	8.04997	8.04688	7.79464	7.60828	7.2512	7.67621	8.04919	7.7912	8.42422	7.75825	7.70858	7.94055	7.90446	7.6238	8.07997	7.77482	7.5782	8.55693	7.9946	7.8557	8.2971	7.71661	8.40121	7.90369	7.74939	7.75276
AMZ1	1.84868	2.19673	1.83092	2.19825	4.37948	3.73787	2.59535	2.6894	4.13384	3.97054	1.43877	4.50386	1.61547	4.9097	3.88932	2.60752	1.89669	3.13507	4.61562	2.26384	2.28787	4.09391	3.17137	3.17388	3.51079	1.46661	1.69909	3.90717	1.71909	1.75322	1.76708	1.80475	1.69128	1.74619	3.63361	2.03541	1.70923	5.10292	1.72658	1.72718	1.72231	4.98199	5.19344	6.03614	1.72658	1.87556	1.70506	1.70208	1.68307
AMZ2	9.19972	9.19749	9.66665	9.45553	9.32314	8.99933	9.30827	9.01084	9.31901	9.23127	9.47764	8.98656	9.40765	9.20558	9.16246	9.13713	8.98294	8.80838	9.4147	8.91894	8.76957	8.77079	9.0803	8.47284	9.44075	9.02152	8.97423	9.50132	9.57074	9.50622	9.35245	9.55301	9.10199	8.9237	9.51695	8.72426	9.33206	8.96587	9.36412	9.39486	9.32998	8.96414	8.74423	8.84216	9.17233	9.19528	9.22481	9.33399	9.40505
AMZ2P1	6.63033	6.61611	6.67637	6.5695	6.59946	6.0788	6.63263	6.04221	6.73202	6.50246	6.97778	6.3701	6.93353	6.45418	6.41674	6.97143	6.38692	6.38177	6.8236	6.41538	6.63893	6.4684	6.64137	5.96795	6.67435	6.59871	6.76343	6.86239	6.42339	6.53276	6.64493	6.4649	6.39752	6.43204	6.58716	6.21949	6.52365	6.82522	6.46711	6.60408	6.07733	6.46451	7.22447	6.87861	6.38963	6.5155	6.4267	6.4514	6.17477
ANAPC10	6.2191	6.22529	6.49644	6.60457	6.4274	6.12074	6.25583	6.17759	6.68774	6.56424	6.52715	6.11646	6.31019	6.2134	6.13556	6.82155	6.10943	6.53008	6.3236	5.89582	5.88218	6.48996	6.32511	6.16557	6.05442	6.44841	6.55058	6.64799	6.41298	6.21538	6.3229	6.06688	6.42972	6.55732	6.31205	6.29254	6.69373	6.46915	6.31243	6.329	5.76522	6.24671	6.14669	6.18386	6.16286	5.96021	5.78657	5.83539	5.72485
ANAPC11	8.69214	8.19783	8.49878	8.3503	8.70328	8.2457	8.64427	8.37241	8.62445	8.11276	8.67496	8.30557	8.53373	8.31302	8.36868	8.47026	8.31595	8.63162	8.81695	8.41796	8.68032	8.35101	8.16008	8.86747	8.61677	8.38649	8.62053	8.87904	8.47698	8.71377	8.55568	8.62674	8.47396	8.48122	8.65469	8.69506	8.62674	8.81695	8.52164	8.34676	8.4791	8.51672	8.54325	8.41437	8.60512	8.44501	8.53972	8.56974	8.25943
ANAPC13	8.91254	8.95176	9.37373	9.41244	8.99139	9.20384	8.81837	8.77079	9.51695	9.62806	9.30827	9.36412	9.08923	9.22032	8.79261	9.52365	9.21257	9.07673	9.06608	9.2185	8.7218	8.64682	9.32998	8.96049	9.26884	8.95677	9.2971	9.05004	9.40258	9.24031	9.39241	8.82274	9.34121	9.32314	8.69214	9.11665	9.31901	9.17956	9.49085	9.60985	9.19528	9.02652	8.90584	8.92843	9.19749	8.87173	9.02454	9.00578	8.88707
ANAPC16	9.53709	9.33399	9.65854	9.48259	9.50622	9.49085	9.42667	9.44989	9.58846	9.35465	9.50132	9.59102	9.38034	9.41708	8.46088	9.60985	9.3039	9.28211	9.40258	9.20384	9.16824	9.14689	9.47525	9.04274	9.3389	9.5194	9.10401	9.44075	9.15084	9.18449	9.63603	9.39486	9.58345	9.58592	9.2361	9.45995	9.30622	9.27325	9.6525	9.56103	9.2361	9.28818	9.01258	9.13282	9.18891	9.34121	8.955	9.20968	9.31711
ANAPC2	3.35451	3.81551	3.96201	4.22911	2.98288	3.61847	4.0112	4.30144	3.93783	3.87574	4.26268	4.03169	3.15566	4.45823	3.70744	3.44477	2.08459	2.53032	3.30183	3.2796	3.86429	4.04593	3.36556	3.74548	3.87574	3.42679	3.98508	1.8461	1.8645	4.36743	1.91734	1.95962	3.14314	5.07457	4.65674	4.51246	4.13151	1.85288	1.868	1.87146	1.87062	3.98374	4.90814	5.75858	1.86033	5.64747	3.7829	1.84039	3.89555
ANAPC4	8.00547	7.54879	7.42979	7.35633	7.0924	7.10456	7.29706	7.00548	7.44884	7.00893	7.72214	6.81359	6.94045	6.93689	7.04476	7.39791	7.81457	7.35011	6.91154	7.07884	7.47921	7.55681	7.13263	6.85628	7.08879	7.37563	7.27414	7.18389	7.41709	7.36534	7.20846	7.0924	7.5494	7.28701	7.2159	7.32605	7.06949	7.24899	7.34198	7.30255	6.96931	7.07319	7.0955	6.71335	6.91109	6.9165	6.64877	6.63462	6.69413
ANAPC5	7.98012	7.36689	7.57144	7.1649	7.65869	7.22447	7.26216	7.37278	7.67397	7.24959	7.67945	7.25475	7.45478	7.15788	7.10544	7.72421	7.74386	7.25013	7.40738	7.2346	7.22868	7.3431	7.56157	7.16639	7.66681	7.7029	7.63876	7.36689	7.02274	7.47921	6.80544	7.39677	7.2512	7.49257	7.43491	7.43491	7.50671	7.68609	7.0527	6.96824	7.39206	7.55164	7.97131	7.83201	7.59469	7.62571	7.70659	7.64832	7.41709
ANAPC7	6.659	6.62351	6.69373	6.4104	6.92996	6.84969	6.91814	6.64925	6.84695	6.85983	6.70299	6.52855	6.68554	6.39232	6.3811	6.97919	6.504	6.77455	6.75364	7.1906	6.5947	6.88898	7.0527	7.13667	6.98625	6.97597	6.91856	6.91482	6.63192	6.68428	6.75788	6.85497	6.86526	7.10987	6.39294	6.54144	6.88657	6.72575	6.73538	6.54903	6.74539	6.86489	7.29084	6.79675	7.0342	6.91061	6.88783	7.04781	6.75071
ANGEL1	5.52918	5.06616	5.4777	5.6639	5.49191	5.5332	5.22245	5.31062	5.66711	5.7292	5.19902	5.69728	5.17033	5.812	5.64747	4.99551	4.89398	5.37861	5.59374	5.68558	5.35293	5.65989	5.29258	4.93097	5.88728	5.69761	5.26148	5.60882	5.77835	5.9013	5.47025	5.75356	5.17426	4.98011	5.31669	5.85347	4.8873	4.94476	5.45973	4.96862	5.21168	4.98613	5.68158	5.35176	4.77134	5.50188	5.30378	5.03138	4.9418
ANGEL2	6.11459	6.23197	6.20151	5.9693	6.1831	5.75454	6.20621	6.07385	6.40577	6.06068	6.38457	5.71947	6.08613	6.02806	5.9335	6.38144	6.20269	6.01928	5.73809	5.63452	5.36654	6.44546	6.16368	6.01043	5.99333	6.06136	6.12577	5.99997	6.00417	6.15258	6.35363	6.03861	6.24042	6.20151	5.89861	6.1053	6.05519	6.16326	6.39787	6.11183	5.81164	5.95727	5.87622	5.86089	5.90441	5.67879	5.58391	5.71214	5.34767
ANGPT1	6.69413	5.02746	4.75482	4.71546	5.30585	5.15729	5.33602	5.07097	5.56908	5.92234	5.90711	4.79663	5.47958	4.13848	5.41406	4.74285	6.28471	5.62767	4.48013	4.61064	4.81202	5.42453	5.40009	5.21096	4.59752	5.48724	4.81884	5.84793	5.91887	5.97488	5.5957	4.8453	5.43749	5.46567	5.94712	5.45461	6.11215	4.70453	6.19106	5.6197	4.62314	6.06436	4.43796	4.39403	5.00662	4.65295	4.52067	5.24517	5.20299
ANGPT2	4.12463	3.53491	4.8559	4.54335	3.34313	3.14879	4.87592	4.20837	3.22374	3.15627	3.52745	1.86645	3.40102	3.16841	4.55725	3.32103	4.68985	3.84647	5.28844	3.48114	3.80776	4.8474	4.18166	5.13503	3.21134	4.15031	4.94099	3.14001	5.4444	3.76348	3.82918	4.10232	4.27481	4.56325	4.01024	4.25558	4.41857	4.1101	4.15506	4.54947	4.21837	3.85091	4.93409	4.6769	3.12078	3.87129	4.17179	4.00515	4.76896
ANGPT4	4.59383	5.48408	0.95662	4.98978	3.2911	5.09273	4.97438	4.60625	2.33751	3.88582	4.17002	6.04473	2.72271	5.71693	5.30666	3.82974	3.73258	3.70943	4.59875	4.92348	5.40571	4.48968	3.76549	4.4155	4.13421	3.8445	4.54827	4.46359	3.748	3.7269	5.1282	1.06664	4.97586	4.1704	4.48931	4.26741	4.04548	3.81885	3.17461	3.63039	5.36588	4.731	5.7332	5.572	5.09474	6.321	5.06862	5.1228	4.31798
ANGPTL1	7.46172	6.99234	6.50054	6.75036	6.85589	5.98856	6.31517	6.76208	7.60145	7.01714	6.86699	6.90935	7.57515	6.88161	6.18702	7.12112	8.42886	7.00893	6.58641	7.53859	5.72412	6.57969	6.75315	6.32826	6.64214	6.42552	6.6059	6.5632	7.13014	6.59675	7.40265	6.44174	7.1798	7.03804	6.27038	6.3095	6.44944	6.91017	6.81578	7.57876	6.53699	6.93133	6.41948	7.21739	6.08275	6.96541	5.5141	6.27713	6.59257
ANGPTL2	7.12468	7.22654	6.69494	6.19359	6.20036	5.98596	6.74278	7.19695	5.83911	5.32886	5.94818	6.13824	7.36417	6.93173	6.05557	6.74628	6.71422	6.89172	7.42408	6.53083	6.34017	6.40998	6.85939	7.1003	6.86787	6.34924	6.44978	5.4415	6.51309	7.00172	6.76644	6.55285	6.73006	6.52479	6.26287	7.11628	6.14812	6.90763	6.86412	7.00042	6.50709	6.41837	6.99771	7.18755	6.26856	6.50785	6.80239	6.55987	6.99469
ANGPTL3	2.84052	0.801703	3.22063	1.97446	2.14936	3.07182	0.7728	2.87716	3.16326	1.82544	1.58955	2.60661	1.60795	2.29982	1.35856	1.84532	1.57101	1.47908	2.80316	1.57205	2.97714	2.0449	1.89866	1.21648	1.9281	2.43221	3.69301	3.41557	2.27282	2.27586	2.66778	3.06775	2.13314	2.34819	2.26914	2.88121	2.90963	0.580147	2.91991	2.92465	3.66104	0.580147	3.43459	2.43704	2.28904	3.06229	3.19456	3.33364	2.78529
ANGPTL4	3.44869	2.16641	0.0674843	1.73554	2.82867	-0.256025	3.05655	3.52745	3.03775	3.57337	3.29414	1.4271	2.20477	2.1854	2.73724	0.187338	3.75046	5.62224	5.78376	3.67577	4.97619	4.89036	2.93139	3.55164	0.717336	4.97503	1.25869	1.23954	1.26871	4.88417	3.71626	1.34702	3.6824	1.29305	5.60028	3.14613	3.24974	1.9183	3.11076	2.57109	1.27495	4.7851	1.32057	1.41157	4.88959	1.39649	5.8228	3.77842	5.08883
ANGPTL6	1.55159	1.18717	0.594392	0.580147	1.66677	1.11446	1.58122	2.92064	1.78984	1.99033	2.74732	0.905228	-0.0701203	1.82704	1.18352	1.00433	0.0367425	1.82248	1.87632	2.05206	1.08725	0.38922	0.740315	1.32157	1.59496	0.349119	1.29677	1.28002	1.30872	1.34185	1.36297	1.39038	3.14501	1.34129	1.29505	4.82526	1.29774	1.31092	1.32299	1.33093	3.81933	1.31247	7.00589	1.45258	4.00196	1.43978	1.29774	4.06	1.29023
ANGPTL7	1.4271	2.64584	0.273696	0.744605	1.37673	1.08052	1.57154	0.182165	3.47604	2.66189	2.85193	1.25272	0.218078	0.749709	0.863176	1.30639	-0.157248	1.88243	0.142319	0.0662677	1.72231	2.94837	-0.010384	0.213519	-0.0437051	0.591581	1.27165	1.25672	1.28459	1.31247	1.33427	1.36108	1.25728	1.31197	1.26929	1.49666	1.26929	1.28317	1.29623	1.30484	1.28976	1.28871	1.33686	1.42659	1.3077	1.41254	1.27215	1.26244	1.26513
ANK1	6.50246	6.80057	7.23808	6.70267	7.91051	7.88915	7.56337	7.0045	6.73494	6.80713	7.14418	7.3452	7.37388	7.40382	6.43448	7.1649	5.70961	6.24638	6.34924	6.71248	7.87273	7.282	6.78831	7.17413	7.17471	7.73173	7.23561	7.14713	6.45219	7.03763	7.21208	7.25723	7.13764	6.7676	6.27612	5.96996	6.91382	7.20797	6.45501	7.22606	7.46506	6.88565	7.27163	7.30135	6.77006	6.03359	7.11861	7.16776	6.91695
ANK2	6.95248	7.24899	7.8586	6.87906	7.71456	7.31142	8.00631	7.21635	7.34847	7.36689	7.76289	7.35011	7.79537	7.44988	7.60077	6.78472	7.22868	6.97597	7.15688	7.4321	7.57387	7.39054	6.75824	7.30541	7.46227	7.31142	7.52795	7.00631	7.71862	7.48457	7.75209	7.20592	7.44348	7.48751	7.32996	7.14896	7.38046	7.22447	7.5213	7.42185	7.0704	7.0564	6.38767	6.6504	7.00172	7.09647	7.25969	7.25068	7.4612
ANK3	8.07015	7.62749	8.4211	7.6901	8.13396	7.74939	8.42529	7.98891	8.488	8.03294	8.30471	8.14629	8.20253	8.01583	7.55735	8.53733	8.02052	8.84811	8.57688	8.50771	8.78217	8.22654	8.06839	8.14533	8.05669	8.14972	8.07577	8.14972	8.71148	8.46817	8.81399	8.33776	8.58266	8.38963	8.37642	8.62445	7.92953	7.588	8.41437	8.46934	8.36968	8.30272	7.48571	8.01509	7.53991	7.88915	8.15912	7.62307	7.72214
ANKAR	2.48748	3.63039	3.69157	3.8268	2.54871	4.3862	4.39007	3.55934	4.36399	4.17129	2.07733	4.1735	3.51287	3.83864	4.04296	4.73853	3.88203	4.35283	2.71055	3.46165	3.20694	4.61024	4.51131	3.82918	2.97993	3.86127	3.69816	3.96345	3.30901	4.28582	4.23088	3.16512	3.75799	3.6744	2.82035	3.43831	2.93139	2.99109	4.87075	3.70358	4.09339	3.88058	4.02658	3.49312	4.44245	3.25089	3.65768	3.80405	2.66072
ANKDD1A	5.00662	3.85987	4.42223	3.96632	4.4792	4.00768	3.48869	4.43796	3.74197	3.78334	4.11417	3.45026	3.17774	4.12186	4.68004	4.3445	3.4981	3.45292	4.16245	4.21055	3.84105	4.66761	3.96823	4.36399	3.98785	3.35105	4.65552	3.48325	4.71093	3.19634	2.84373	3.98273	3.91708	3.68139	3.55055	2.57726	3.82179	4.16413	2.62392	4.05466	4.25109	3.84789	3.88823	3.61487	3.84747	3.66051	3.11609	4.09251	4.56235
ANKFN1	1.81889	1.65531	2.99109	3.15176	1.03981	3.53206	1.35962	2.44781	3.15627	1.7118	3.71356	1.80407	3.1614	0.855823	2.45572	1.95358	2.13195	2.01285	2.59753	2.44907	1.19903	2.6533	2.82867	2.35338	2.27586	2.91036	3.04482	2.61676	2.8159	2.61173	3.05655	2.30621	2.77255	3.97521	2.63791	3.23732	0.585918	3.6824	1.88936	2.73724	2.46579	2.90248	2.52214	2.97068	2.98945	3.64768	2.91758	2.93356	0.59327
ANKFY1	6.02727	5.48179	5.62256	5.10762	5.45353	5.25776	5.49338	5.15248	5.28956	5.46837	5.84726	5.20176	5.58391	5.1994	5.31597	5.4594	5.61831	5.50599	5.21946	5.23605	5.4093	5.43749	5.31025	5.70712	4.6748	5.33883	4.89831	4.99226	5.63378	5.20491	5.52763	4.94354	5.23933	5.45761	5.79791	5.68874	4.65595	5.12975	5.61831	5.53353	6.17916	5.94416	5.84862	5.13392	5.82835	5.35987	5.14291	5.49191	5.44677
ANKH	7.52426	8.07831	7.53859	7.70597	6.99422	7.20394	7.30368	7.60887	7.70597	7.94523	7.76084	8.33088	8.16008	7.81457	6.88898	8.33188	7.63694	8.02818	7.97623	7.7776	7.18489	7.21264	7.63945	7.13719	8.03217	7.78696	7.60077	7.85225	8.00874	8.52019	7.80832	7.96371	7.72353	8.12243	7.82176	8.8212	7.71584	7.72631	7.78485	7.76212	8.04761	7.60706	8.50653	8.17139	7.77013	8.1668	7.45644	7.75209	7.68746
ANKHD1-EIF4EBP3	6.58923	6.882	6.97328	6.97275	6.70193	6.89919	6.86064	6.76038	7.30368	7.47799	7.0955	7.18537	6.65386	6.57378	7.46506	6.54934	6.34372	6.57969	6.30605	6.74368	7.27614	7.07319	6.57997	6.89531	6.4514	7.05315	6.88823	6.44764	6.76723	6.4972	6.78258	6.29761	6.84461	7.09598	7.41467	6.61788	6.48255	6.67358	6.91522	6.573	6.90128	7.46558	6.77573	6.86198	7.13564	7.16685	7.07943	7.11332	6.86606
ANKIB1	7.19401	6.86888	6.60324	6.72969	6.66557	6.22349	6.90177	6.81445	6.80325	6.68774	6.60766	6.55442	6.83779	6.75315	6.46957	6.94045	6.99771	6.57929	6.58329	6.80414	6.26441	6.37402	6.87561	6.29941	6.73538	6.45255	6.56352	6.55732	6.93601	6.48137	6.90895	6.396	6.69759	6.16638	6.44209	6.49565	6.59757	6.34592	6.56552	6.96388	6.38255	6.63741	6.23197	6.47045	6.35086	6.57162	6.52044	5.88661	6.64649
ANKLE1	1.5375	1.64175	0.108966	0.250448	0.0936632	0.377984	0.986115	0.205022	1.54941	1.07885	0.86993	0.940409	0.18583	0.909142	0.732186	0.552429	0.041742	-0.35903	0.842761	0.884243	0.718971	0.528013	0.193624	0.171855	0.818873	0.675248	1.0194	0.991981	1.02115	1.04999	1.0842	1.09239	1.00761	1.05828	1.00433	1.23898	1.0194	1.04038	1.04773	1.046	1.03921	1.04544	1.09239	1.16294	1.04895	2.89142	2.11486	0.993775	1.01587
ANKLE2	4.65674	5.40571	5.07457	5.7589	5.17764	5.49226	5.21697	5.22545	5.23284	5.51257	5.31783	5.79892	4.94846	5.15027	5.84652	4.89647	4.90137	5.26634	5.44713	5.25481	5.68526	5.32393	4.8377	5.29889	5.19513	5.2753	5.55623	5.34698	5.69005	5.40607	4.96862	5.43634	5.11095	5.3746	5.62004	5.44899	4.92978	5.18928	4.92621	5.01695	5.27051	5.2091	5.10477	4.83571	5.24248	5.35444	5.24361	5.35403	5.1923
ANKMY1	1.65598	3.60054	3.08829	2.70727	0.384302	2.25335	0.706123	2.07961	0.901351	1.49013	0.741946	1.68614	1.11842	1.34471	0.564963	1.33093	1.51297	0.60871	2.01523	1.57896	1.16858	1.74619	-0.0365815	2.79712	1.31355	0.362582	1.40718	1.38993	1.41606	3.82579	1.47168	3.38052	2.94601	3.02013	1.40176	1.64447	1.40315	1.41948	1.43106	1.43512	1.42062	4.18817	3.91847	3.16269	2.8749	1.54252	1.40857	1.39395	1.41547
ANKMY2	9.0965	8.8452	9.03897	8.92532	8.72297	8.63392	8.57099	8.61025	8.89967	8.55964	8.9587	8.61025	8.59841	8.47284	8.80838	8.59979	7.8203	9.00578	8.45182	8.26326	8.56173	8.61809	8.81262	9.0965	8.55001	8.11776	8.83611	8.94644	8.93165	8.21246	8.64295	8.24464	8.58735	8.68449	8.30658	8.58266	8.9587	8.26593	8.70998	8.34489	8.72562	8.56865	8.65826	8.70601	8.6829	8.82994	8.57099	8.2651	8.61025
ANKRA2	7.01092	7.35055	7.11223	7.31643	7.56101	7.28308	7.66869	7.43995	7.68079	7.28851	7.66138	7.39272	7.04147	7.37098	6.80239	7.71042	7.1353	7.34029	6.85093	6.511	7.06307	7.57201	7.50254	7.52542	7.01384	7.59354	7.16826	7.41345	7.74939	7.52366	7.98323	7.18955	7.31193	7.29084	7.35011	7.06307	7.35235	7.26071	7.69969	7.81836	7.15093	6.91563	6.55818	6.94991	7.07788	7.10634	7.16868	7.06949	6.88037
ANKRD1	8.7795	8.48916	9.60684	10.7703	8.62807	9.04815	8.66348	8.70726	10.0444	10.0284	9.53106	10.8515	9.98434	10.3109	9.79707	9.39241	9.46265	9.36206	9.52138	9.58846	10.1984	9.59583	9.58078	9.40258	9.7467	9.40258	8.6494	9.05756	10.036	9.68565	10.0835	8.84811	8.72426	8.6711	9.02454	9.58078	8.54676	8.20638	7.18125	9.53965	10.3574	10.4772	9.19749	9.82812	8.77785	9.06608	8.45182	9.72754	9.53407
ANKRD10	6.21701	6.06292	5.67431	6.30246	5.62186	5.99065	5.83872	6.10305	5.75593	6.05963	5.70745	6.10701	5.91377	6.14852	6.80146	5.93609	5.96208	5.81622	5.86089	6.2449	6.24848	6.511	5.94454	6.10835	5.77731	6.03784	6.166	5.97955	6.01928	6.18191	6.29794	6.27425	6.17155	5.7589	5.9335	5.90639	6.17114	5.98703	6.21701	6.44442	6.11335	5.85347	5.64307	5.86833	5.97353	6.34592	5.92123	5.99866	6.30719
ANKRD11	5.26829	5.29109	5.29258	5.21913	5.00181	4.99504	5.38152	5.25136	5.43707	5.25181	5.1521	5.09517	5.5208	5.21244	5.64968	4.99143	4.79489	5.84652	6.08712	5.2026	5.22708	5.58502	5.30479	5.39573	5.36654	5.81235	5.06896	5.12857	5.31857	4.75333	5.63748	4.82526	5.78694	5.45013	5.44401	5.5049	5.01885	5.16347	5.43593	5.48801	5.25072	5.81832	4.21837	4.98978	5.33071	5.34404	5.19113	5.3128	5.39865
ANKRD12	6.96977	6.39407	5.8644	6.1073	6.06068	5.83833	6.56158	5.50827	5.84652	5.91079	6.14957	6.13107	6.02727	5.93458	5.63562	6.3229	6.36847	5.86543	6.09407	5.83236	5.85079	6.26891	6.53083	6.09771	5.82413	6.15372	6.19106	6.40064	6.18245	6.28769	6.58882	5.89582	6.13291	5.89301	6.11335	5.72596	5.80341	5.65412	5.98779	6.25036	5.77694	6.2832	5.27497	5.56634	5.61611	5.78694	5.32557	5.76202	6.04066
ANKRD13A	6.42814	6.43563	6.21183	6.37212	6.32174	5.98061	6.4856	6.46538	6.31824	6.01646	6.52205	6.19969	6.19425	6.215	6.64606	5.99032	7.08332	6.69455	5.75394	6.36646	6.55565	6.34966	6.96347	6.54903	5.96327	6.4053	6.31391	6.05927	6.03995	6.4589	6.21876	5.8037	6.50748	6.66148	5.9673	6.52044	6.4915	6.52715	6.36302	6.74582	6.43126	6.38963	6.73949	6.48878	6.40846	6.89395	6.39481	6.33381	6.23607
ANKRD13B	4.76405	4.54384	4.61024	5.03248	5.07214	5.4444	4.65948	4.91403	4.68043	5.03781	4.17799	4.93338	4.48515	5.08368	5.52477	4.23215	5.01063	4.91362	5.06167	4.15388	5.09034	4.77427	4.57359	4.74326	5.05727	5.067	5.20426	4.97893	3.81746	3.84497	4.64613	4.63036	4.0883	4.51403	5.28454	5.26055	4.22285	5.05243	5.35335	4.3413	5.02657	4.42491	4.95495	5.11758	4.61392	5.05243	5.36222	4.60502	4.93021
ANKRD13C	5.11379	5.44567	4.82683	5.46234	5.55588	5.77586	5.08729	5.49377	5.36909	5.45315	5.20636	5.51809	4.86863	5.56866	5.0406	5.07835	5.58078	5.06935	4.86522	4.95241	5.3228	5.36798	5.58432	5.6098	5.25972	5.50299	5.40009	5.55229	5.40315	5.35987	5.75024	5.19984	5.31309	5.57624	5.47242	5.56986	5.44256	5.25815	5.38799	5.47958	5.04265	5.12932	4.82803	5.29371	4.97966	4.92136	4.90252	4.95913	4.91323
ANKRD13D	4.6509	3.69863	4.16633	4.21617	4.33139	4.04387	4.46718	4.62912	4.61262	4.03024	3.24974	3.83454	4.41591	4.25558	4.76209	4.59752	4.2118	4.03641	4.38409	4.533	4.09391	4.29966	3.92405	4.51828	4.33006	4.12092	4.27481	4.1987	4.25377	3.896	3.9273	4.89987	3.36795	3.63039	3.81294	4.14795	3.94164	4.59526	3.78977	3.94301	4.48968	4.14029	4.15971	4.72102	3.66496	4.17758	4.61562	4.43752	4.50839
ANKRD16	2.30361	1.85288	1.41606	1.70635	1.51798	1.49389	1.73615	1.42462	1.42314	1.27165	2.32774	1.23264	1.91102	1.59803	1.83605	1.68734	0.985361	1.30484	0.741063	0.564963	1.2856	1.35962	1.5281	1.22602	0.242878	2.72359	1.91535	1.90443	1.93206	1.98494	1.98272	2.02546	1.88858	1.95871	1.90118	2.3174	1.9281	1.91925	1.93303	1.93875	1.93766	1.90029	1.96808	2.11219	1.92599	2.11606	1.90443	1.90526	1.87908
ANKRD17	7.54504	7.13317	7.07491	7.19266	7.50786	7.39617	8.05154	7.09892	7.67117	7.23908	7.25917	7.36791	7.64526	7.29186	7.65359	7.29131	6.69118	7.2577	6.86606	7.48513	7.15093	7.39677	7.31412	7.32891	6.99422	7.30921	7.20592	7.18537	7.3354	7.23966	7.2512	7.14418	7.38165	7.62009	7.35349	7.26624	6.92919	6.52009	7.1649	7.35235	7.07601	7.44517	7.38165	7.1381	7.35349	7.30309	7.40265	7.21057	7.25861
ANKRD18A	2.3642	2.1439	1.31409	1.31355	2.09466	1.81646	1.46389	3.19263	1.5375	1.44475	1.52552	3.00706	0.874184	2.26653	1.17623	3.07448	0.483533	4.3537	1.62182	0.607525	1.60909	1.75582	1.33141	1.25869	0.560386	0.640264	3.35632	1.11446	2.72621	1.16858	1.19622	1.21982	1.11895	2.42157	2.79712	3.06917	1.13748	1.14672	1.16231	1.16353	1.15528	1.15365	1.19622	3.31083	1.16577	1.27165	1.12849	1.1166	1.12725
ANKRD18B	3.16074	3.23144	-0.256025	3.09149	0.0430907	3.75149	3.43735	2.89481	1.13692	4.20705	2.58901	1.32403	3.87325	3.23477	1.80199	5.59501	2.75807	1.36196	1.75523	1.25564	1.17513	2.0242	3.44706	3.00332	1.37237	2.12964	2.53481	4.3445	3.93399	4.06442	0.811578	0.815696	2.1231	0.789554	4.26355	4.59911	4.24399	3.60441	4.80424	3.94436	3.87717	2.79051	3.15368	3.76603	3.34365	0.900668	0.744605	3.25936	0.759106
ANKRD19P	0.343142	0.250448	0.148015	1.10845	0.989937	0.181235	2.91673	3.02865	2.43412	0.877024	1.50097	0.564963	1.69128	0.211807	0.041742	0.977435	1.0678	0.477096	0.780154	1.24882	1.02772	1.01014	0.00254037	0.841207	0.897003	0.489294	1.03797	1.01084	1.03797	1.06927	3.22176	1.11207	1.02046	1.07504	1.0254	1.25869	1.03567	1.05651	1.06292	1.06239	1.05702	1.06127	1.11076	1.17623	1.0648	1.174	1.0254	1.01524	1.03624
ANKRD2	5.38764	5.47598	8.37931	7.58962	9.56103	8.40622	8.86896	7.03903	9.0536	8.5861	6.62089	8.4073	9.50381	9.72442	6.5607	9.25327	5.23566	8.92212	9.21442	7.93877	8.69506	7.84226	9.41244	8.40121	8.69506	8.68157	9.73026	7.76884	9.20384	6.89045	6.75364	8.2971	8.12798	8.94999	8.86896	9.19528	9.48786	8.53502	6.43563	8.44501	8.58735	9.31494	9.04815	9.3879	6.84339	9.24675	8.30857	7.94284	7.64895
ANKRD20A5P	2.97219	1.05068	1.50479	2.26519	4.50176	1.06836	3.10412	3.9397	2.04878	2.75995	1.68614	4.48142	4.18166	0.978877	1.85202	1.96325	1.27073	4.06232	2.86373	3.2007	3.46116	1.86033	1.88443	2.1271	2.00643	2.4732	2.33987	3.07182	2.72271	2.93565	1.4271	2.3642	0.998173	3.18625	2.22599	0.458605	3.00191	2.16641	0.309246	1.69847	2.28666	3.33301	2.13195	2.67798	2.5619	3.73112	3.37703	3.31018	1.92693
ANKRD22	4.67272	3.11076	4.01164	4.47368	3.39183	3.97792	6.29128	6.13291	3.64936	4.21533	4.21009	3.34131	3.38614	2.69511	2.91379	4.40438	6.75201	4.24731	4.15343	3.33187	3.60108	3.68094	3.96345	4.18413	3.52986	3.52926	4.38409	5.06539	4.29276	4.2892	4.28873	5.17426	4.33815	3.977	3.43506	6.44095	2.83202	4.63085	4.55362	4.7759	3.97792	4.45574	3.70499	5.11638	3.45354	4.96404	2.90461	4.77876	3.81104
ANKRD23	5.13322	5.47994	5.83405	6.54226	7.9279	8.28192	5.31025	5.08292	5.64679	3.78935	5.64164	3.54176	5.14291	4.66485	5.26485	5.90925	3.90624	5.00865	5.25407	5.73502	6.68041	5.58145	5.74126	5.48408	6.81578	6.33343	5.96829	4.97198	4.99143	6.27187	5.52953	4.94063	5.60575	5.4093	5.08217	6.38144	6.29648	6.0858	5.66711	5.71214	4.86324	5.40384	5.40121	6.6822	3.53711	5.59681	6.22385	5.5041	6.78472
ANKRD24	0.200559	1.7612	1.81069	3.0536	1.47691	1.62593	2.11606	1.58173	1.5488	1.23097	2.94601	0.167572	2.2478	1.51946	1.57835	1.3235	1.00567	1.79933	1.1202	1.70742	3.9052	-0.00505808	0.234792	1.32507	2.91913	0.965023	1.49563	1.48573	1.51354	2.34212	2.45789	1.59254	4.52353	4.5227	1.49563	1.74619	1.49989	1.51027	3.74039	4.05955	3.45292	4.32402	4.30541	4.64292	1.52607	1.64735	1.50208	2.25446	1.48324
ANKRD26	4.6521	4.7855	4.65422	4.19737	4.69759	5.45315	4.86024	4.59007	4.67439	4.95036	4.95159	4.77055	5.30771	4.88452	4.30962	4.97438	4.54298	5.43443	4.57193	3.82974	4.69359	5.26792	5.67589	5.41745	4.50923	4.32482	4.62792	5.51701	5.24361	4.76124	5.08438	5.06293	4.29442	4.95369	5.07835	4.29136	5.21733	4.55401	4.21134	4.60625	4.7134	4.65903	3.57651	4.42304	3.8223	4.29476	3.25683	2.27847	3.39242
ANKRD27	7.11671	7.35581	7.087	7.30921	6.90214	7.00763	7.34415	7.24265	6.85843	6.95569	7.58735	7.23651	7.26128	7.24899	7.14801	7.3174	7.76752	7.32446	7.51348	7.25475	7.26071	6.74916	7.06992	7.3431	6.96114	7.1277	7.43491	7.282	7.31412	7.37214	7.34735	6.91601	7.66804	7.15227	7.21471	7.46172	7.5261	7.12161	7.63876	7.31093	7.12065	6.96541	6.99102	7.39392	7.35176	7.01532	7.25861	6.98161	6.9143
ANKRD28	6.25259	5.86335	6.52766	6.07282	6.33647	6.01928	6.61157	6.15721	6.44285	6.02839	6.30567	6.35743	6.5884	6.39947	5.66807	6.27576	6.2678	6.3042	6.12217	6.00976	6.30674	5.93645	6.39558	6.1274	5.93574	6.34092	6.40804	6.36692	6.36116	6.46124	6.56424	5.72446	6.49565	6.58595	6.24318	6.27114	6.34966	5.99376	6.40265	6.66754	6.09062	6.3135	5.79157	5.8245	6.0364	6.08095	5.87354	6.07658	6.13791
ANKRD29	6.73161	5.74665	6.19885	5.9265	6.1545	6.03165	5.77405	5.65884	6.19812	5.75062	5.73954	5.86913	5.35335	5.42079	5.77957	6.04846	5.53826	4.88417	5.33743	5.45426	6.25779	5.88996	6.01082	5.80475	5.57344	6.04066	6.10981	5.62083	6.03465	5.11095	5.67395	5.23088	6.22673	5.75426	5.36026	5.27808	5.80439	6.45092	5.44862	6.12395	5.67627	4.94302	5.77221	5.73241	5.13576	5.38113	5.39353	5.44713	6.22898
ANKRD30A	1.07091	3.72898	3.98685	0.924566	4.14554	3.07124	1.57896	3.32345	1.54992	1.0194	1.78098	0.621454	0.835975	1.00302	2.22849	2.19338	2.3174	1.38459	1.78243	2.5619	1.72425	1.61606	1.66342	1.77282	1.82248	1.72658	2.4865	2.54471	0.329169	3.38	0.362582	2.9476	4.06627	2.81663	3.38108	3.66051	0.319588	2.39843	3.32345	3.07381	4.35466	2.68203	3.00986	2.72179	3.85226	3.86683	3.2516	3.42571	2.74086
ANKRD30B	1.90623	1.96436	1.26144	0.118619	1.33199	1.56748	1.10581	1.53614	-0.0437051	0.996326	0.600663	1.49901	0.571612	0.774384	1.17347	1.15419	1.16632	0.98459	0.97536	0.448744	0.624278	1.26621	0.91807	1.03439	0.793102	0.44475	0.977435	1.40315	0.585918	0.581508	0.626502	0.631275	1.54476	2.45662	2.73323	3.00986	0.570405	1.75523	2.59306	1.72107	2.3642	0.741063	0.674124	0.718971	2.77075	3.42787	2.89401	2.19944	0.582872
ANKRD31	0.88732	0.518006	0.855823	0.446691	1.01752	0.312953	0.656679	0.199184	0.206655	0.239457	0.246364	0.816539	0.705151	0.609989	0.143288	0.131673	1.21541	-0.0203272	-0.00238888	0.470572	0.0936632	0.510987	0.77701	0.0430907	0.12368	0.0959085	0.899145	0.888726	0.905228	0.925199	0.965023	0.968427	0.897003	0.945583	0.888726	1.12666	0.896309	0.920742	0.932288	0.927268	0.916689	0.928428	0.98671	1.04999	0.93602	1.04145	0.88654	0.883503	0.909858
ANKRD33	3.62056	3.1856	2.83202	2.92764	3.5582	0.0815994	3.58662	0.359418	1.21126	4.31049	3.46507	3.57997	2.69117	4.49915	2.86671	2.85663	2.84373	4.30618	3.37703	3.12712	2.8271	1.8947	1.78379	1.72602	3.00629	1.83904	0.570405	2.59972	3.63039	4.56939	4.12463	2.91537	3.27001	3.9654	2.28123	0.766886	3.6526	2.95613	4.17799	3.55761	3.46977	3.31409	3.83591	2.27847	3.15436	3.77012	3.88109	4.45735	4.11685
ANKRD33B	5.19479	5.5832	5.6187	5.25072	4.52865	5.71796	6.32438	3.34079	5.92123	5.6301	5.84513	3.88987	1.99618	0.183154	5.09579	2.91913	0.708062	3.41607	3.96865	4.32563	4.70402	4.76937	3.42249	5.31558	4.51246	3.95915	6.00608	1.28871	7.03946	5.08683	1.37076	1.40176	6.3229	6.49843	5.71356	4.01615	1.3053	1.31953	1.33141	1.33856	3.76151	7.22298	6.8187	6.07211	4.35112	4.2623	3.80712	1.29677	7.00042
ANKRD34A	1.60206	0.352231	1.68898	0.178692	1.67393	0.510987	1.3678	0.236139	1.0005	1.35802	1.14609	1.18461	1.85854	0.926593	0.609989	0.158611	1.25616	0.810735	0.877622	1.10791	1.21237	1.18396	1.38933	1.07994	1.83904	0.664404	1.56485	1.55965	1.58283	1.61714	1.63329	1.6645	1.55916	1.61185	1.57205	1.82408	1.56589	1.58012	1.59312	1.59908	1.58519	1.58283	1.6284	1.72231	1.59496	1.72107	1.57041	1.56256	3.99717
ANKRD34C	4.77225	3.47422	4.75525	1.66559	1.50313	3.33301	4.68773	5.4687	1.15747	0.757468	3.53149	4.3391	4.45007	4.11465	3.69481	4.57682	3.96823	4.36743	4.21879	5.51091	2.84684	3.54072	3.77347	4.63932	3.98329	2.93222	4.3391	4.27921	4.3469	4.28049	5.14523	3.85661	3.66393	4.46444	5.0042	5.2285	3.89426	3.99189	3.36036	3.99051	2.67682	5.52189	3.56079	4.22423	3.86936	3.83265	1.27692	3.00986	3.19634
ANKRD35	4.48097	4.12634	4.80266	4.16591	4.52823	4.66485	3.95404	4.4497	1.94522	2.33987	4.47538	1.5874	5.24964	4.41911	5.53285	5.09949	4.83016	3.9373	4.61064	4.24289	4.22234	3.93783	4.27707	4.54515	4.07795	4.8453	4.72535	4.10554	1.44333	3.85937	4.13191	5.11927	4.06876	1.99754	3.85319	4.58827	4.4443	4.25823	4.42171	4.81673	4.93371	4.58742	3.844	5.16697	4.32599	4.91731	4.97586	5.58993	5.21421
ANKRD36	5.21776	4.62835	4.3502	4.48334	5.1521	4.89151	5.17344	4.36661	4.55362	4.84613	5.14718	4.34232	4.93338	4.2109	6.28698	4.70307	5.07376	4.11198	4.31968	4.48284	4.86446	4.89359	4.6254	4.83016	4.29642	4.95743	5.12744	4.9986	3.65715	4.13627	4.96172	4.16057	4.44292	4.25784	3.82038	4.45481	4.99791	5.6018	4.89151	5.17387	4.07645	5.09273	4.65295	5.01029	4.72235	3.85027	4.14653	2.69599	3.60279
ANKRD36B	5.69473	4.10699	3.45235	4.13721	5.19268	3.53875	5.93074	4.42925	5.2753	3.84105	5.23497	3.95075	4.91115	3.70148	5.82805	4.24289	5.17724	4.18505	4.30054	3.73112	4.29136	5.09431	3.93259	4.18455	4.06394	4.57401	3.66146	3.86936	3.83406	3.62265	3.95915	4.5227	3.66104	3.9439	3.50629	4.41591	3.58516	4.62835	2.34092	5.28025	4.41382	5.14253	4.55034	3.46872	4.7958	3.5338	3.69783	3.49205	3.12647
ANKRD36BP2	3.45354	4.37648	3.87525	3.39139	2.96992	1.17991	1.93961	3.22063	1.05828	3.28135	3.56033	2.29306	4.2814	2.60661	5.53216	3.30018	4.26494	1.96721	1.7081	3.81746	3.86845	4.38709	2.47573	3.86796	1.64735	3.25224	3.55336	3.80919	1.50924	4.11291	3.0553	4.25964	2.79959	3.69686	3.30318	3.72335	3.8307	4.29442	4.0658	3.59021	3.43983	2.69436	2.86298	3.18427	3.93876	3.97199	3.17835	3.59654	3.6768
ANKRD37	6.77223	6.50166	6.47821	6.03995	6.18446	6.29869	6.57162	6.79798	6.20188	5.73176	6.58677	6.19359	7.26739	7.10315	6.77616	6.52284	6.89442	7.41709	8.47698	6.55692	6.48299	7.23857	6.42629	7.15189	6.55778	6.99176	6.71873	7.00356	6.97686	6.92618	6.99722	6.82194	6.87473	6.51928	7.03555	7.41179	6.87516	7.97943	6.24459	6.32747	6.3236	6.80669	6.19027	6.4382	6.32784	6.17728	6.39407	5.93865	5.8601
ANKRD39	6.15987	5.85186	6.70775	6.24774	6.0672	5.97276	6.44764	5.10062	6.14999	5.3488	6.09097	5.93251	5.92613	5.65273	6.12775	5.8344	5.24634	5.53353	6.71946	6.35522	6.48721	5.61289	5.3843	5.96619	6.35004	6.10666	6.80146	6.15539	5.65412	6.00608	5.77922	5.86986	5.63597	6.25708	6.20036	5.63378	6.46365	6.83608	6.17759	5.98137	6.06292	6.51851	6.55987	6.62259	6.5099	6.39866	6.54025	6.28769	6.31051
ANKRD40	6.63116	6.62816	6.63229	6.68474	7.12904	6.94942	7.18907	6.73907	6.78298	6.82485	6.65341	6.84166	7.03717	7.08519	7.80903	6.49113	6.87993	6.86526	6.91109	7.24531	7.20592	6.63462	6.75902	7.35581	6.83275	6.92874	6.34554	6.60628	7.08287	6.89258	6.73949	6.8127	6.88419	7.0031	6.69671	6.83779	6.64137	6.81398	6.72058	7.10593	7.04511	6.83199	6.73081	6.81033	6.9129	7.04327	7.08046	7.12017	6.97411
ANKRD42	4.49505	3.83022	3.54498	3.24786	3.41966	3.92779	3.68998	3.38725	4.28673	1.67157	3.94164	0.129331	3.94943	3.90624	2.30486	4.3413	4.22511	3.40279	4.0434	1.9623	3.05763	3.57109	3.99806	4.00768	3.73001	3.32282	2.60062	2.76309	2.69436	3.89469	3.25867	2.67909	4.0112	3.39813	3.45692	3.07249	3.31518	2.20597	2.8245	4.05777	3.75194	3.7585	0.57298	3.50971	2.93711	2.98945	3.89751	2.66593	4.08789
ANKRD44	5.03935	4.68808	4.19385	4.87998	5.00302	4.77558	4.9747	5.22132	4.50091	4.54827	4.81761	4.7373	4.46008	4.21009	4.21134	4.5676	6.25625	4.2421	4.2641	4.21488	4.32276	4.69924	4.57315	4.02658	4.17758	4.42399	3.68502	4.41682	4.40492	4.76083	5.32161	4.18069	4.72535	4.0227	3.80616	3.7944	4.40039	4.22692	4.81803	5.33811	4.53385	3.78836	3.63309	3.41336	3.80154	3.94258	4.14234	4.05222	4.25914
ANKRD45	1.85602	1.40955	0.682639	0.108966	-0.0701203	2.6138	-0.847811	-0.20772	2.14816	1.84785	2.5426	0.0200824	1.05476	1.41066	0.228175	0.707116	1.69735	1.02115	1.66677	0.68469	1.68898	0.774384	1.05884	1.5306	1.294	1.28871	3.86796	0.869368	0.881958	0.902902	2.21793	3.51233	3.71404	2.60752	0.866465	1.09958	2.61464	3.27239	2.14816	0.900668	1.93489	0.909142	3.24786	1.02409	0.912096	1.01697	0.868692	0.858616	0.881958
ANKRD46	8.31187	8.44087	8.45778	8.44396	8.36402	8.32184	8.14268	8.28689	8.38334	8.31399	8.26407	8.24464	8.3439	8.34927	7.33374	8.4335	7.84302	8.18075	7.90023	8.01972	7.89445	8.09968	8.36681	8.25943	8.25676	8.15391	8.47159	8.53605	8.20023	8.44739	8.35307	7.8394	7.95028	8.44949	8.1995	8.0876	8.49537	8.20987	8.254	7.86866	7.85711	7.99064	7.7669	7.84302	7.93298	7.96497	7.94812	8.06325	8.03444
ANKRD49	6.28698	5.63748	6.28052	6.20621	6.40028	6.08913	6.10666	6.05671	6.46711	6.0795	6.11215	5.60474	6.42163	5.80095	6.09168	6.44019	6.41417	6.12364	6.00828	5.84196	5.92613	6.18733	6.58039	5.92613	5.75454	6.19969	6.02107	6.3701	6.24283	6.45542	6.28013	5.72526	6.16482	6.19254	6.02218	5.99333	6.45051	6.53818	6.4915	6.62581	5.94818	6.30098	6.42014	6.19561	6.36608	6.36692	6.2632	6.16444	6.25779
ANKRD50	5.89757	5.46607	5.62039	5.93074	5.80694	5.56064	5.16956	5.33943	6.1247	5.35484	5.58688	5.52882	5.84126	4.84013	6.22308	5.95593	5.61689	5.85379	5.60882	5.70381	5.66986	5.513	6.32438	6.01761	5.53285	4.98613	5.32557	5.58651	6.08204	5.70638	6.15182	6.09627	5.86986	5.62675	5.83755	5.65958	5.66491	5.03736	5.98246	6.3619	5.49569	5.86986	5.26985	5.30411	5.49845	5.59162	4.73194	5.29558	5.60709
ANKRD52	3.10293	4.52691	3.94654	4.05222	4.11776	3.84497	3.17328	3.51994	1.81646	4.61103	3.18625	4.38409	4.33006	4.67969	3.37942	4.07795	2.00086	4.00867	3.52146	2.13719	3.10859	3.69634	2.8211	2.36685	3.35571	4.23396	2.05784	4.55806	2.05681	2.11126	2.11353	2.14936	2.02077	2.09466	5.80614	2.40807	2.05302	3.5728	2.05997	2.05681	2.06701	2.03432	5.48953	2.23097	2.05302	2.23329	4.18636	6.50598	1.99514
ANKRD53	3.83406	1.58847	2.50581	3.28204	3.31234	3.50067	4.61946	1.48226	2.90248	2.36534	4.48013	1.59138	4.00768	4.78628	5.2959	2.837	2.2772	2.76647	1.67778	5.19578	4.10508	1.93961	1.51083	4.57603	2.64478	3.3473	4.2552	0.884243	3.80776	4.57193	0.959876	4.14234	3.75244	0.939747	4.18505	4.97402	5.12392	2.94308	3.96778	2.77075	4.62912	0.923887	5.11604	6.0885	4.70064	5.75102	3.83167	4.90734	4.48142
ANKRD54	3.14254	3.94209	3.84834	5.25704	4.06921	4.25295	3.03337	4.45912	4.01824	4.90535	4.08415	5.13281	4.57064	4.52231	3.88249	4.33723	1.8947	4.30453	4.79239	3.93259	4.32563	4.33228	4.14509	4.44067	4.15788	3.18372	4.08965	1.16858	5.3128	5.23975	4.42121	5.38468	1.17183	5.31597	4.36319	5.51337	5.32814	5.66026	4.63169	1.21864	5.28409	5.3709	5.71143	5.62224	5.10356	5.75718	3.18133	5.23171	4.6538
ANKRD55	4.59875	4.96736	2.86906	4.84253	4.41812	4.7269	5.01813	5.76001	4.49042	3.71445	4.32229	5.05283	4.50645	5.25704	3.81253	4.04769	4.42079	4.54608	4.21261	4.34968	5.86986	4.50804	5.02434	4.44339	4.2892	3.818	4.44925	4.98939	4.23669	4.96561	5.66491	5.62703	4.2118	4.7826	4.56632	5.00459	4.21662	4.55896	4.77186	4.53163	5.21733	4.20549	5.61546	6.10271	4.94263	6.35933	4.88959	4.66613	4.24781
ANKRD6	6.80024	6.70147	6.50435	6.1445	6.46668	5.94024	6.07246	5.90401	6.33231	6.11609	6.43361	6.32865	6.14275	5.96902	6.25036	5.95334	5.72778	5.79517	6.18702	6.2585	6.40735	6.09808	6.55732	6.504	6.61826	5.56422	5.78449	5.90065	6.10377	6.30674	6.15617	6.00646	6.34092	6.08433	6.16929	6.07804	5.83474	6.61522	6.52205	6.28873	6.12577	5.90774	6.14161	6.35246	6.09298	5.97955	5.74165	5.86244	5.82071
ANKRD7	3.00917	2.27024	1.41547	1.59194	1.64113	3.17199	2.74086	2.29982	3.1279	3.01495	1.76553	2.93935	3.5156	1.95253	1.74801	2.16997	3.23603	1.6896	1.72967	1.22546	1.33686	2.08054	2.79631	1.76435	2.95826	2.0242	1.88443	2.51052	4.16057	3.39073	3.8007	3.12006	2.95458	2.50581	2.17247	0.581508	3.3879	0.432011	0.374773	1.50549	3.40544	2.75539	2.62152	2.72436	0.377984	3.46607	3.67577	3.04647	2.48184
ANKRD9	7.95201	8.25176	8.4114	8.32496	8.06325	8.51126	8.30762	7.98323	8.37726	8.32895	8.77222	8.6989	8.57099	8.78217	8.63913	8.35101	7.75743	8.20537	8.7557	8.64051	8.73626	8.51322	7.84519	8.63162	8.58988	8.8857	8.72039	8.66348	7.8849	8.32279	7.52014	8.42886	8.53373	8.49656	8.24279	8.3406	8.30471	8.10953	7.99382	7.39272	8.32992	8.85681	8.74193	8.91108	8.363	8.50653	8.87904	8.7128	8.55333
ANKS1A	8.03697	7.69591	7.3174	7.06218	7.56515	7.55221	7.85225	7.61744	7.26567	7.33919	7.90748	7.45288	7.25068	7.41864	7.88075	7.35055	7.5431	7.26457	7.2577	7.84454	7.23966	7.26674	6.59389	7.00548	7.21208	7.08926	7.51532	6.92128	7.43706	7.00216	7.41179	7.39897	7.2891	7.49711	7.08926	7.17741	6.82155	6.76038	7.17471	8.09968	7.16049	7.29706	6.67637	7.41864	6.9844	7.34469	7.67315	6.81398	7.66804
ANKS1B	3.09149	3.44101	1.51193	2.33643	1.11969	0.597049	1.68492	1.47168	1.48952	3.1456	1.63203	1.57041	1.4806	0.919431	1.83092	3.0657	0.368485	1.20734	0.0594894	1.35575	1.07611	0.989307	2.72822	1.43782	1.05884	0.793102	1.13182	1.11496	1.1385	1.1691	3.83636	1.22037	2.82867	2.56998	1.79717	1.35147	1.13805	1.14735	3.03188	2.91036	1.15587	3.20314	1.19678	3.21869	2.39566	2.62881	1.12896	1.11714	2.07859
ANKS3	4.93665	4.6769	5.07654	4.11732	4.98772	4.05955	4.14234	4.36143	4.49585	5.04509	4.77838	4.44339	4.8381	2.84211	5.5012	4.05727	4.05466	4.94437	4.9422	4.39321	4.65164	4.76124	4.49637	4.62197	3.87473	4.718	4.22958	4.80684	5.04866	4.71017	4.16019	5.08517	4.5702	3.81885	5.14886	3.9273	5.24143	4.12851	4.43056	4.49345	3.17388	3.45911	3.80405	4.04769	4.23993	3.70544	4.56029	4.10363	4.85426
ANKS4B	1.77072	0.509331	0.881958	0.405388	1.95253	0.799763	1.04202	0.902099	0.343142	0.972791	2.86609	0.791469	3.31963	0.595793	-0.518168	1.24826	1.07885	1.48226	1.13748	1.44278	-0.847811	1.21495	1.34361	1.04831	-0.0510843	0.522995	2.1439	1.21541	1.24376	1.27692	1.29677	1.32507	1.21917	1.27027	2.09582	1.45834	4.06232	1.24993	1.26196	1.26871	1.25616	1.25306	1.29774	1.39082	1.27165	1.37628	1.23097	1.22302	1.22602
ANKS6	3.9995	3.64385	4.5773	3.23799	3.78381	1.87387	3.1394	2.80228	3.17461	3.82092	2.95313	2.03117	2.92691	2.31026	4.08505	3.5156	3.63855	3.38	3.38446	3.1394	3.31642	3.71866	3.36494	3.19816	2.03802	1.91734	3.818	3.53094	3.00191	3.15238	2.54471	4.08458	3.42571	2.25079	2.50217	4.00196	3.5156	2.99919	0.61401	3.25036	3.83356	2.05302	2.62519	2.81426	2.47906	3.956	2.41636	3.30183	3.51767
ANKZF1	4.8381	3.6819	5.19857	5.1654	4.52353	5.78304	5.32706	5.769	3.5776	5.24927	1.4552	4.64377	5.00221	4.42079	5.51257	4.34091	3.78735	4.29913	4.56589	4.18916	4.51706	6.05927	3.54595	4.35689	3.93055	3.88394	4.78668	4.45173	2.08842	3.25224	4.34181	4.77265	5.58008	4.5983	0.793102	1.0254	4.12139	4.15031	4.283	4.59571	5.40384	5.06539	5.23765	4.12851	4.5773	4.97024	3.7779	0.77932	2.32774
ANLN	3.33908	3.61227	3.48445	4.10879	3.42679	2.66969	1.9183	3.51233	3.37147	3.85459	3.30132	3.69592	3.53934	1.24503	7.40738	3.11412	3.61076	3.35982	3.22808	2.96992	2.79051	3.16841	5.74232	3.18068	3.04412	3.49261	2.39332	3.68502	4.06777	3.43397	3.25747	4.01824	3.70897	3.69096	3.72023	2.8804	4.71182	3.3879	4.08373	3.16586	3.70795	-0.20772	2.55105	4.96329	3.36368	3.04107	3.08369	3.13216	2.8804
ANO1	5.57908	5.76791	4.16019	5.13426	4.31136	4.64613	3.56222	4.44292	2.81426	4.39867	3.91377	4.74524	4.4719	4.81164	4.82636	4.35601	3.44706	3.80012	2.35338	5.4553	3.98876	4.77186	4.97402	4.08319	4.533	4.42491	4.44664	4.30576	3.43789	2.78171	3.28862	4.97966	5.04976	3.85803	3.9551	4.06627	5.02589	4.93707	1.38414	4.06777	4.23438	1.37031	1.41948	4.16732	4.38585	4.59526	4.30576	3.93399	5.51632
ANO10	6.13037	5.40534	6.46086	5.96169	6.43407	5.85552	6.03614	5.84616	6.4146	5.63562	6.24283	6.15721	6.25625	6.50748	5.72963	6.05855	6.94488	6.1247	6.05519	6.00382	5.95727	5.7627	6.29254	5.41189	6.17796	6.19743	5.68937	6.20111	5.45461	5.85379	6.10598	6.3619	6.22149	6.52811	6.12034	6.71119	6.17656	6.33306	6.31679	6.19027	4.95369	6.17617	6.39076	6.36268	5.95559	5.89929	5.81338	5.65958	5.88115
ANO2	1.73229	1.57322	1.26461	2.11126	0.998758	1.52044	1.60146	1.75049	2.88855	1.18862	1.72543	1.67896	2.54993	1.44426	2.28787	1.4012	1.28614	2.78253	1.32924	0.991981	1.66288	3.31291	1.41157	2.63791	1.37628	1.58792	1.93766	1.92599	1.96436	2.00969	2.00306	2.05302	1.91535	1.98818	1.92693	2.34092	1.95358	1.95062	1.95788	1.95871	1.9623	1.92693	3.70851	2.1439	1.95148	2.14672	1.93489	1.92492	1.90118
ANO3	0.830772	3.65715	1.43877	0.154631	1.32403	0.582872	0.590154	2.26254	1.04274	3.52436	0.597049	0.277554	0.638994	2.42303	1.15309	1.80475	1.20415	1.16014	0.189716	1.23427	0.919431	0.198179	1.31512	0.676375	1.20328	1.68124	0.683599	1.7796	3.60279	3.01926	2.81426	2.72621	2.81663	0.716503	3.15109	0.890126	3.68722	0.705151	1.85202	2.2838	0.699907	2.19186	0.765346	0.809951	1.75931	0.825159	0.661045	1.5846	3.67133
ANO4	1.23427	1.74619	1.49666	1.54079	1.78582	1.47471	2.16874	2.08459	1.64552	1.9623	1.32403	1.45147	0.0578381	1.1166	0.575856	1.43877	1.07148	1.12725	1.34702	0.502196	0.884243	0.112935	1.71586	3.64214	0.220208	1.3552	0.999856	0.971437	0.9956	1.02887	3.53491	1.07436	1.99754	1.03384	0.981365	3.26	1.76929	1.01649	2.15817	3.12938	1.01649	1.0247	2.63105	3.12712	1.02716	1.13636	0.986115	0.97536	1.94429
ANO5	8.57208	8.8111	8.36009	8.83754	8.96414	9.1645	8.81695	8.89166	8.55825	8.89511	8.96049	8.7189	8.19525	8.40844	7.76546	8.99139	8.75841	8.38244	8.55333	8.30272	8.28192	8.58988	8.60512	8.06756	8.68576	8.74552	8.31187	9.06304	9.10755	9.07489	9.22481	8.59341	8.89818	8.86294	8.91254	8.58147	8.57463	8.27612	9.08741	8.55229	8.88074	8.74795	8.05154	8.33577	8.59726	8.39494	8.37931	8.35606	8.45182
ANO6	8.34927	7.78338	7.90898	7.59082	7.82989	7.58667	7.81967	7.27312	7.97623	7.25427	7.90527	7.63061	7.98568	7.65025	7.62445	7.94284	8.21162	7.49257	7.40137	7.95491	7.63007	7.66604	8.12884	7.27674	7.95278	8.13668	7.63121	7.64068	8.11276	8.10382	8.26798	7.75349	7.88552	7.98323	7.91523	8.02472	7.75891	7.50786	8.06516	8.22289	7.79464	7.577	7.00042	7.52677	7.63364	7.69461	7.37826	7.31412	7.61134
ANO7	1.31669	0.659983	2.18668	1.56532	1.56971	1.75322	1.41667	0.913521	0.898403	1.45147	0.0149782	0.908432	0.016463	1.70444	2.69599	0.647217	1.04038	0.241139	1.28925	1.26461	0.455223	0.563299	0.108966	1.30728	1.07934	1.40718	1.64552	1.65082	1.66622	1.70085	1.7153	1.75115	1.64232	1.69367	1.65715	1.95062	1.65142	1.66342	1.67953	1.67896	1.67495	1.66677	6.40846	1.81211	1.67834	1.81363	1.65358	1.64907	1.63613
ANO8	3.9649	5.2166	3.38845	3.14385	3.29719	4.4719	4.26866	4.47496	1.3591	4.21488	4.4443	4.33139	3.31586	4.72235	3.79286	3.51394	3.09817	2.8159	3.43506	3.57167	4.44545	2.6687	2.94531	3.91993	4.63511	4.41002	5.10727	4.89873	0.991981	1.02604	6.31137	6.00721	4.98939	1.03073	0.978153	6.87809	0.993775	5.1417	5.7627	5.27188	4.84951	5.25072	2.34939	1.13954	5.51598	6.22608	3.81701	0.972104	0.994385
ANO9	3.31347	1.96721	3.75301	2.01163	2.09582	3.86683	4.25016	3.01849	0.960564	3.89188	4.2835	5.01733	4.63594	4.37603	4.21617	2.50814	3.61378	3.96389	4.33466	4.32014	2.10363	4.45089	3.46758	2.33407	4.17267	3.62494	4.44292	4.00237	2.53131	3.92779	0.688757	3.44046	3.44314	3.09688	3.48011	2.93711	3.59748	3.34949	0.675248	4.48239	3.26944	4.54827	4.11378	3.48541	1.59194	4.61714	4.63838	4.06876	3.57337
ANP32A	8.22851	8.57208	8.09103	8.53733	8.09885	8.30372	8.1271	8.39185	8.30162	8.78716	8.07256	8.63776	8.2971	8.37726	8.33088	8.66062	8.15912	7.93877	8.14351	7.92394	7.97373	8.09543	7.60828	8.72562	8.17892	8.10953	8.2895	8.00631	8.53733	8.20537	8.46088	8.37534	8.19699	8.07758	8.35606	8.43752	8.15486	7.96497	8.53733	8.68157	8.19525	8.19242	8.12075	7.75947	8.10794	7.77903	8.01879	7.92158	7.98174
ANP32A-IT1	0.851838	1.22459	0.097148	3.52591	1.77411	0.0385103	3.18894	1.74442	2.91036	0.874871	1.88346	0.717336	0.429584	1.93674	1.44729	-0.24214	3.60703	0.31675	2.41767	1.43559	1.14293	0.197423	-0.047219	1.0648	1.70692	0.669999	1.00504	0.97601	1.00176	2.47029	3.05707	1.07775	0.993775	1.04038	0.98671	1.22459	1.00113	1.02115	1.02955	1.03073	1.02172	1.02955	1.07729	2.5607	2.81337	1.14118	0.991981	0.978153	2.17589
ANP32B	9.44075	8.66591	8.84216	8.49136	8.85264	8.34186	8.90439	8.66062	9.15084	8.8857	8.98125	8.7795	9.27775	8.53129	9.65586	8.5	9.02827	8.72703	8.61416	8.72562	8.85989	8.60512	8.90937	8.74552	8.70328	8.92685	8.92062	8.72824	8.60889	8.49878	8.70601	8.65351	8.86896	8.95176	8.63266	9.02152	8.45778	8.91108	8.7128	8.955	8.95677	8.9237	8.87338	8.71643	8.81399	8.71643	8.29141	8.36507	8.42529
ANP32C	1.74981	0.742936	0.45109	1.13253	0.723596	0.97601	1.49715	1.00949	1.50924	2.76568	0.335372	1.52607	0.937362	0.862393	1.49173	1.71586	1.09008	0.923887	1.00885	1.15587	1.23159	0.199973	1.0648	0.553963	1.46172	1.21082	1.59803	1.59733	1.6166	1.64958	1.66342	1.69735	1.59138	1.64347	1.60388	1.87062	1.59672	1.61365	1.6284	1.63085	1.61837	1.6166	1.65766	1.75582	1.62652	1.75861	1.6032	1.59614	1.5874
ANP32D	3.63855	3.41607	1.1691	1.04999	1.77681	0.829923	1.16632	1.14232	2.67249	0.587293	2.54993	1.01809	3.83734	1.09174	1.16353	4.28873	1.26929	3.14954	2.31184	1.68376	1.26244	2.9858	3.36795	2.23214	1.77478	1.71655	3.01426	0.273696	2.86147	2.78842	4.2632	0.290941	3.04482	2.17589	0.260527	2.73621	0.290941	2.62392	3.57651	3.12449	2.94837	0.499338	2.93565	3.11945	3.2516	3.43397	2.85895	3.86683	3.06631
ANP32E	8.31692	7.83346	7.94055	7.78412	7.74121	7.63694	7.58143	7.56634	8.55333	8.18602	7.87935	7.6238	7.84226	7.65359	7.75947	8.1375	7.4251	7.83405	7.5042	7.51233	7.71801	7.53349	8.30762	7.7029	7.64468	8.25176	7.99382	7.77218	7.77978	7.64003	8.20703	7.94676	7.87722	8.06325	7.74515	7.95639	7.90605	7.68428	8.14712	8.22851	7.6355	7.69862	7.38549	7.76021	7.43706	7.65599	7.26509	7.54989	7.26567
ANPEP	1.90206	1.51083	1.65715	2.12031	1.84264	2.81247	2.27024	3.24223	1.48427	1.13182	0.125553	0.103149	2.99566	1.85509	1.09889	1.52709	4.2375	1.44074	2.09466	1.80847	1.51297	-0.24214	3.30959	0.580147	2.2346	1.64677	2.15082	1.35575	2.73227	2.9765	1.43512	2.81516	3.49355	3.22747	2.55426	3.7269	2.93292	1.38459	1.39911	3.07516	1.38316	1.38822	3.05217	1.5189	1.39444	3.62494	1.36989	2.49873	1.35686
ANTXR1	7.48876	6.50828	6.27973	6.45965	6.93865	6.45926	6.37129	6.60457	6.88328	6.69331	6.48216	6.84548	6.85589	6.58039	6.53479	7.02566	6.6585	6.40769	5.67729	6.84873	6.07423	6.4997	6.59174	6.46013	6.78573	6.69159	6.19291	5.63632	6.30098	6.37402	6.78095	6.44676	6.77656	5.97769	5.8724	6.28245	5.98813	6.74183	6.01761	6.77135	6.21623	6.20151	6.8195	6.62993	6.33833	6.66718	6.18486	6.33686	6.8208
ANTXR2	6.97597	6.64841	6.87516	6.98665	6.62701	6.53897	6.76922	6.97411	7.2577	7.53121	7.19111	7.20144	6.86934	6.48054	6.61157	7.22815	7.66402	6.79404	6.76922	6.92874	6.70049	6.63116	6.56739	6.4514	6.96161	6.7993	6.90854	6.9435	7.69461	6.81618	6.88161	6.84919	6.96977	7.18582	7.53573	7.1697	6.7284	6.44325	6.64257	6.71908	6.51024	7.04287	6.89579	6.61431	6.60457	6.69068	6.77967	6.60719	6.51884
ANXA1	8.50771	7.64068	7.20592	7.51654	8.11276	7.78617	7.97212	8.31399	7.34198	7.13104	7.0736	7.30768	7.79864	7.51411	7.92394	7.60274	9.06608	7.62504	7.18537	7.23406	7.3826	7.70917	8.13668	7.07656	7.81388	8.51126	7.4931	7.75549	7.37989	7.577	7.09991	7.66869	7.36577	7.18811	7.44933	7.7695	7.9193	8.57688	7.25524	7.64762	7.84652	7.57876	7.76612	8.07577	7.96897	8.16346	7.74939	8.78362	8.44835
ANXA10	3.25747	1.35465	1.31038	1.42366	1.22459	0.609989	2.14816	0.561993	1.22415	4.44664	0.206655	3.97999	0.678647	1.39082	0.9931	1.39798	0.21475	1.00433	1.55625	0.392197	1.6979	1.69429	2.16997	-0.0632726	1.13636	2.88635	0.635229	3.24974	2.90799	4.3455	0.670934	0.678647	4.07483	2.58996	0.587293	3.94896	0.621454	0.666568	0.654704	0.656679	2.06435	2.8749	4.44925	0.757468	0.6506	3.35331	1.75451	0.58873	0.625505
ANXA11	8.72966	8.5277	9.0093	8.3439	8.82994	8.38334	8.88868	8.82415	8.955	8.34927	8.65098	8.59726	9.24463	8.59601	8.58735	8.76273	8.91108	8.89318	8.79381	9.27529	9.16246	8.66348	8.39593	8.88868	8.92212	8.74423	8.87028	8.77785	8.63036	8.7408	8.62917	8.67638	8.82994	8.90739	8.63661	9.07139	8.73783	8.54552	8.31302	8.19614	8.85554	8.98125	9.16824	9.18449	8.84366	9.06762	8.96225	8.66062	8.98125
ANXA13	0.339036	1.10065	1.55264	1.53614	4.27092	1.65834	0.923887	0.195824	1.44593	0.718163	1.05068	1.71473	1.80475	2.00969	2.62693	1.28459	2.27282	4.08738	1.33489	1.12948	0.950423	2.61571	1.76191	1.23898	1.11783	3.19697	2.75094	0.460739	0.510987	2.52457	0.545783	0.539365	0.481487	0.487355	2.87429	3.17461	1.86981	0.533073	2.78253	0.514519	3.39418	3.5338	4.9322	5.75426	0.514519	2.55657	0.477096	0.477096	3.05417
ANXA2	9.19749	7.73034	8.30162	7.44646	8.75061	7.42691	8.55825	8.22851	8.60095	7.78412	7.6901	7.53121	8.90287	7.95555	8.87173	8.00462	10.4602	8.24744	7.853	9.76528	8.3521	9.03897	8.63913	8.19699	7.64343	8.42202	8.16262	7.68681	8.53033	7.93027	8.51126	9.05004	8.58502	8.4791	8.05154	8.08074	8.08307	9.39241	8.63776	9.06945	8.92062	8.4791	9.09863	8.89318	8.72703	8.86896	8.12884	9.18449	8.59102
ANXA2P1	1.20787	4.04124	0.0855419	4.34232	4.46625	3.83864	4.17799	3.93447	1.96808	4.90494	1.42748	1.80066	1.66503	4.35902	1.89669	3.58773	4.37033	3.21869	3.86683	3.24223	3.27296	4.47413	4.78214	3.27726	1.75523	3.68	3.17835	0.634005	5.22058	0.655723	4.22736	4.43245	3.91181	3.618	5.23605	3.83454	0.655723	4.52691	3.91086	4.15031	0.676375	4.42264	5.18646	0.783954	3.91286	0.799763	3.61703	2.19338	3.46219
ANXA2P3	3.07048	3.86991	3.49154	5.05882	5.37206	2.29045	4.34412	3.43397	5.70928	2.95613	3.41288	3.38845	4.46899	3.60394	3.68351	4.37814	4.09865	5.067	3.87766	5.34806	4.8156	4.48608	5.79927	4.27001	3.75149	4.00919	4.34729	4.36895	5.20103	4.93058	3.77706	4.32099	4.94476	4.24289	4.37421	3.36731	4.78088	5.63562	4.54608	4.58782	3.84789	4.42574	4.13582	2.79469	4.35689	3.67733	3.20496	3.75046	4.49999
ANXA3	7.43706	7.87935	8.91254	7.7973	9.27098	8.63162	8.51012	7.90605	8.83611	7.69461	8.15674	8.1844	8.41345	8.36009	7.98729	7.67682	7.74515	8.62053	8.01196	8.31187	8.81262	8.955	8.63162	8.71377	8.38026	8.40622	8.33188	7.82247	7.68233	8.4211	8.60245	7.68291	7.94812	8.54096	8.07831	8.45878	8.36765	8.27075	8.29519	8.31801	8.75061	7.75209	8.16169	8.03614	8.35606	8.69506	8.38244	8.69506	7.39445
ANXA4	7.71318	7.0704	6.71537	7.1722	7.11087	6.71076	6.78341	7.48381	7.12301	7.11129	6.3308	6.96205	7.24586	7.08136	6.75943	7.1964	8.14972	6.7749	6.76479	7.18955	6.28501	6.86109	7.12714	6.8777	6.86836	6.78438	6.85269	6.62701	7.15143	6.54025	6.76124	6.97597	6.95248	6.882	7.04425	7.13941	6.92577	7.35349	6.7275	7.20797	7.00263	6.73993	6.94128	7.00893	6.78388	7.22298	6.46197	6.80279	7.24632
ANXA5	8.91402	8.94644	8.52164	9.18891	8.6989	8.93476	8.39076	9.11278	8.59601	9.15426	8.02654	8.75061	8.79261	8.87494	9.1059	8.8842	9.53965	8.68032	8.56307	8.75061	8.30162	8.92685	9.25726	8.58735	8.7795	9.03897	8.71762	8.45182	8.80838	8.64295	8.72824	8.9896	8.78078	8.7763	8.81695	8.58864	8.74552	9.2361	9.10755	9.0536	8.81262	8.46723	8.05933	8.34186	8.80965	8.45667	8.8966	9.27098	9.41244
ANXA6	6.20227	7.65282	6.47854	7.76021	6.21264	7.94898	6.70613	7.67178	5.65303	7.92319	6.25259	7.81753	5.80652	7.65214	6.4289	7.16185	7.42979	7.20746	6.71662	7.19596	6.77888	6.0878	6.85136	7.05019	7.81753	7.24423	7.5431	7.57635	7.30199	7.68233	7.28537	7.69326	7.15189	7.33746	7.63007	5.21502	7.39328	7.77978	7.19155	6.87688	7.84797	7.65416	8.23122	8.17688	7.73915	8.26715	7.821	8.03614	7.91355
ANXA7	8.87764	9.19109	8.87028	9.1348	8.9896	9.0028	8.80242	9.09268	9.06304	8.9896	9.091	9.26205	8.76545	8.79143	8.67905	9.28414	8.9299	8.99551	8.85408	9.08576	8.55333	8.93808	9.0644	8.45085	8.85264	8.98125	9.08426	8.97582	9.14495	9.00444	9.38034	8.87338	9.20968	9.06945	8.92062	8.80113	8.9936	8.70726	9.03897	9.13095	8.78867	8.75841	8.62807	8.72426	8.71377	8.9587	8.94114	8.73783	9.0644
ANXA9	1.05539	0.12446	3.8445	3.80919	2.25335	1.22811	2.98945	0.843367	3.0536	0.210941	2.80574	1.22415	0.953964	1.66559	1.59194	0.620198	0.998758	3.0657	1.80066	3.5037	2.33987	1.61487	0.16015	1.07554	1.31569	2.64809	4.14147	0.999856	1.0283	1.0577	1.09065	1.10115	2.85596	2.79126	1.01649	1.24826	3.69536	4.41857	1.05413	2.38283	1.046	4.15085	1.09831	1.16858	1.05539	1.16294	2.58901	1.00302	1.0247
AOAH	4.60042	4.53567	5.14804	5.2228	4.55401	3.99008	5.79853	6.05063	3.63756	4.46042	4.02992	3.52492	4.08415	3.67187	3.89333	3.79858	8.51427	4.51988	4.18718	3.52492	3.80012	4.75041	4.71639	3.9535	3.12712	4.307	4.907	4.74524	4.05511	3.09081	-1.13806	4.98472	4.14878	2.87813	3.7331	3.85803	3.88394	4.68773	5.06093	5.1153	4.65633	4.90535	3.18068	4.54298	4.25295	4.71885	5.48136	2.75712	5.10168
AOC2	3.81885	4.08505	3.3747	3.32033	4.10232	4.18371	3.17951	0.798876	3.20764	4.02612	2.71274	0.227362	4.44021	1.64958	4.24694	3.9081	3.39305	3.41163	3.70044	3.50791	3.42085	3.15509	3.52544	3.22747	2.26384	3.71866	0.335372	3.95963	3.91847	4.06733	3.51136	3.69783	3.36036	3.65817	3.37089	4.0344	3.45526	2.89703	3.91041	3.71779	3.56383	4.04076	4.33139	0.474786	3.80353	2.37436	3.42146	2.98288	3.11278
AOC3	7.98568	7.29651	7.24327	6.40657	7.90748	6.53123	6.60887	6.87946	6.57032	5.70712	7.30827	5.87488	6.68736	7.32834	8.02231	6.36227	6.4684	7.39392	5.88344	7.50478	7.10272	6.78756	6.46086	7.07448	6.73705	8.28776	6.95753	6.3833	6.28577	6.77931	6.19638	7.01579	7.22815	7.03374	5.84616	6.6378	6.86657	6.81618	7.01435	7.23651	6.20665	6.9764	5.60745	6.27713	5.61253	6.15755	6.95437	7.97051	8.01803
AOX1	4.38276	3.59072	1.16858	2.51999	3.97653	3.74294	3.41499	2.8749	4.09865	3.91941	4.19955	1.90029	3.92831	4.2645	2.76472	3.50124	6.51884	3.67627	3.69954	3.51136	3.96632	4.49872	3.45692	3.48171	3.89555	4.32852	4.3436	4.01824	-1.13806	3.17835	3.83318	4.38883	3.68	3.89692	4.3445	4.14878	2.85016	4.70107	4.16147	4.06494	4.51131	4.38364	4.57401	4.14326	3.2839	3.29778	3.80154	4.77016	3.6819
AP1AR	4.60583	5.13209	4.5865	4.87396	4.58041	5.18067	5.38912	4.87592	4.97893	4.96561	4.59911	5.09791	4.77791	4.77683	4.3445	4.97244	4.64247	5.05882	5.05132	4.43614	4.2641	4.62403	5.30172	4.85763	4.72273	5.11965	4.85636	5.44185	5.19693	5.0754	5.25283	4.86604	4.80684	4.55237	5.17426	4.39614	4.97929	4.74739	5.21946	5.21987	4.83129	4.68043	3.93297	4.283	4.93371	4.43614	4.34232	5.06539	4.78393
AP1B1	4.61946	6.26635	5.43443	5.7942	5.12744	4.53122	4.3455	5.69577	4.45173	6.04581	5.33524	5.83682	4.63511	5.62909	5.09791	5.46837	6.69455	5.78628	5.8752	5.41826	4.47413	5.13426	5.20299	5.55069	4.95876	4.93058	5.1346	5.65925	3.82038	4.96602	3.76603	5.44401	4.64946	5.39164	5.78197	5.70745	5.40355	5.79823	4.93449	4.32064	4.9766	4.64209	6.1545	6.30757	5.18844	5.12857	6.18807	5.77922	6.23455
AP1G1	6.43289	5.88182	5.79759	6.04325	6.01491	5.53104	6.29906	5.88413	6.39198	5.79586	6.09944	5.7489	6.48095	5.82206	6.08275	6.20296	6.11215	6.07658	6.20036	5.9693	5.528	5.89411	6.63379	5.7627	5.85881	6.28471	6.07066	5.87055	6.4053	5.68057	6.44133	5.89793	6.37562	6.24042	6.22273	5.96397	6.16482	6.39912	6.34837	6.38022	5.9424	5.8746	6.58247	5.41153	6.06585	5.17681	6.3319	5.69871	5.95658
AP1G2	4.34647	3.96963	2.19673	2.48548	4.19438	4.00196	3.34888	4.21879	3.41107	2.78093	1.70324	4.3862	3.73426	3.90577	4.15831	4.23528	4.78214	3.31291	2.91036	3.79333	4.1101	2.90885	2.76309	3.54791	1.43167	3.46977	3.81843	4.0983	3.20567	3.30515	2.3856	3.40279	2.88709	2.78171	3.89044	1.12456	4.26741	4.66369	3.60613	4.09565	4.47966	3.74039	4.06494	1.04773	3.91752	4.06777	3.29301	3.63969	3.90942
AP1M1	6.10305	6.36409	5.52654	6.62351	5.80546	6.02455	5.70154	6.27898	5.9023	6.66924	5.33283	5.94569	6.17407	6.35246	5.7142	5.94492	6.09586	6.45772	6.40735	6.05162	6.31937	5.31597	6.04364	6.5947	6.39481	5.70568	5.99032	5.8511	6.28125	5.96249	5.50899	5.89861	5.41706	5.86833	5.90743	5.91507	5.78798	5.78724	5.71981	5.44862	5.98633	6.02806	6.49843	6.51268	5.91816	6.51666	6.57887	6.27006	6.64409
AP1M2	4.533	1.85029	1.47856	3.63309	1.78519	5.46309	3.66793	3.41966	4.55162	1.15419	3.80457	2.92691	2.37166	2.33269	1.19678	2.27024	2.65857	3.17951	3.09875	3.90673	3.82282	1.87556	2.87716	2.66778	3.31409	3.27535	5.27728	0.701168	4.53652	4.52736	0.768492	4.16785	4.09656	4.76368	5.02746	5.46417	4.04076	3.40888	0.755112	4.97198	3.90471	3.92488	5.00221	4.04682	4.10837	4.814	0.698918	3.29526	4.17573
AP1S1	4.70186	4.73853	4.89566	5.19546	4.76288	4.93184	4.80108	4.78976	3.21307	4.70107	4.47628	5.24996	4.89764	4.57819	4.9391	4.62364	5.37681	4.16549	5.09078	5.22667	5.16084	4.10751	5.26634	4.31488	5.12193	4.69396	4.73348	4.98472	4.96256	4.49505	3.54553	4.80464	4.79193	4.51043	5.26553	4.55982	5.01813	5.52226	4.29778	4.68592	5.16084	4.84951	4.92181	3.73787	4.98011	3.74491	4.68472	4.64209	5.12392
AP1S2	8.78362	8.65599	8.73927	8.99551	8.49227	8.44223	8.53241	8.73115	8.46277	8.23122	8.45549	8.48688	8.67638	8.59102	8.75973	8.81962	8.79381	8.79381	8.98125	8.57688	8.50452	8.39814	9.15084	8.6115	8.443	8.53605	8.70043	8.57688	9.04655	9.09268	8.98125	8.55333	8.81695	8.81962	8.91563	9.18214	9.0536	8.84957	8.96225	9.16026	8.57463	8.81262	8.92685	9.07673	8.81962	8.85104	8.26053	8.4791	8.73234
AP1S3	1.59614	2.8271	0.57298	1.57041	2.20868	3.31963	1.11969	2.22599	1.33686	3.27239	2.63791	1.57322	1.64175	1.83518	1.69025	2.0425	2.66072	1.48324	1.08362	1.4552	0.874871	1.5281	1.67556	1.30169	1.98591	3.06302	2.83287	2.61173	1.70923	2.04371	2.2072	2.69798	2.74086	2.36297	1.92125	3.48114	2.77075	2.64584	2.14104	2.5783	2.45789	2.32283	1.96141	3.57592	3.3592	2.81247	1.67661	0.468653	2.63791
AP2A1	1.37285	3.50067	1.51635	3.52986	1.67556	3.79179	1.6896	2.33855	2.47906	3.8011	1.14777	3.40325	1.56142	4.14839	1.59445	3.46921	3.62104	3.09817	2.28787	1.19242	1.79043	2.01859	1.83605	1.71407	2.06316	2.74181	2.31623	2.28904	2.32137	2.35867	2.35867	2.35209	2.2772	2.32662	2.30782	2.51248	2.33643	2.309	2.29982	2.30782	2.32774	4.38922	2.34567	2.41266	2.33143	2.41636	2.25967	3.91602	2.23727
AP2A2	5.75394	5.93146	5.86124	5.513	5.56279	5.39423	5.68492	5.84937	5.28916	5.87092	5.1499	5.08104	6.1262	5.92683	6.04544	5.51157	6.75615	5.62383	5.77694	5.72526	5.64679	5.59264	5.42762	5.63669	5.50188	5.7942	5.39197	5.45494	5.69798	5.30049	5.15479	5.53573	5.26829	5.62426	5.67952	5.14918	5.23605	5.402	5.43859	5.04544	5.77653	5.58765	5.87693	5.87166	5.88182	6.09407	5.79651	5.87927	5.93681
AP2B1	7.33919	8.10692	8.33276	8.17326	7.61432	7.92713	7.96126	8.01583	7.89445	8.46088	7.90898	8.29326	7.78134	8.16092	7.82247	8.30557	8.14438	8.33188	7.96973	8.25176	7.73776	7.76487	7.85644	7.70221	7.90304	8.05508	8.20537	8.11353	8.22851	7.95201	7.95028	7.70659	8.11776	8.27075	7.9729	8.38119	7.86087	7.58202	7.67945	7.65025	8.06093	8.11999	8.26407	8.50556	8.08914	8.15756	8.28861	7.93877	8.17139
AP2M1	8.7189	9.11665	8.33675	9.05947	9.01447	8.76957	9.1429	8.9299	8.94114	8.89166	8.8039	8.50771	9.17017	8.78996	9.21442	8.81837	8.73115	8.61935	8.42012	8.56653	8.28403	8.42422	8.93476	8.9896	8.62807	8.16593	8.42202	9.03545	8.98811	8.97423	8.43087	9.31901	8.75173	8.51322	9.41708	9.03545	8.97582	8.47801	8.66996	8.68952	9.15271	8.80535	8.77496	8.9896	9.21257	9.09478	8.72562	9.05186	9.51695
AP2S1	7.07656	7.79992	7.15227	7.82562	7.25379	7.76884	7.35581	8.11177	7.15227	7.64411	7.04327	7.61191	7.39897	7.86648	8.13579	7.40805	7.65359	7.70029	7.78964	8.42651	7.77282	7.76021	7.1697	8.10281	7.69129	7.1823	7.86372	7.65671	7.29442	7.48197	7.21099	7.73244	7.57264	7.88154	7.81836	7.97131	8.14972	8.02317	7.4275	7.70659	7.43595	7.43647	8.39298	8.15674	7.95491	7.88835	7.65944	7.96371	7.88403
AP3B1	5.71283	5.46346	6.4198	5.79719	6.00215	5.85186	6.14999	5.79079	6.2832	6.22349	5.95885	5.78769	6.52205	6.06105	5.76487	5.72633	6.61004	6.33049	5.9673	5.93037	5.7749	5.88037	6.24154	5.87092	5.84235	6.29381	6.00382	6.13556	6.05031	5.91227	6.34592	6.06328	5.98347	6.23543	6.01315	6.29941	6.01459	6.18529	6.31137	6.15217	6.04438	5.82171	6.04581	6.38494	6.05747	6.12506	6.25259	6.20731	6.20765
AP3B2	3.1406	3.88394	2.93292	4.00196	1.18207	3.05763	3.87325	1.36355	2.86536	4.66884	4.05819	3.80503	4.10314	0.683599	4.26823	3.47085	3.34431	2.59118	3.40708	3.77429	4.82045	2.227	4.38276	1.34702	3.23099	3.40483	0.371782	3.581	5.22667	4.15647	4.09005	3.11546	3.43345	3.46116	4.67884	0.563299	1.1805	2.84684	4.16019	4.13247	3.2164	2.08706	2.79215	5.28215	4.1019	4.35689	3.53817	3.68298	3.09287
AP3D1	7.18955	6.8127	7.64832	7.05676	7.26889	6.98015	7.68233	7.35349	7.7172	7.3826	7.75549	7.56769	7.59596	7.46558	7.59469	7.29706	7.26845	7.36905	8.23809	7.49773	7.13317	7.16911	6.78616	7.35908	7.30602	7.40442	7.19939	7.02658	6.95477	7.00042	7.5444	7.04976	7.46728	7.38647	7.05804	7.61611	6.84793	6.86365	7.15375	7.12714	7.14985	7.88237	7.64268	7.38831	7.36689	6.96433	7.79992	7.13719	7.41531
AP3M1	7.21536	6.91736	7.39791	6.92956	7.35847	6.90522	7.42691	6.88161	7.09105	6.88517	7.27115	6.61431	7.25175	6.77182	6.55167	7.39897	7.08519	7.21536	7.16685	6.86109	6.98214	7.12663	7.3703	6.99722	7.12557	7.17065	6.91695	7.05932	7.2276	7.0281	7.48571	6.65429	7.27674	7.20247	7.23357	7.01579	7.12714	6.96388	7.4251	7.4708	7.20394	7.08561	6.93557	7.15572	7.00042	7.1798	7.08136	6.9165	6.98161
AP3M2	6.64925	6.7001	7.26845	6.90935	6.71201	6.42814	6.93557	6.77413	6.8187	6.8391	6.54384	6.19254	6.54657	6.33793	6.83062	7.08561	6.43634	6.46013	6.43674	6.04034	6.45332	6.68428	6.73039	6.89842	6.5914	6.3445	6.20589	6.24996	7.04701	6.60844	6.55247	6.61742	6.52321	6.54061	6.44174	6.8227	6.47441	6.1274	6.47582	6.42014	6.37562	6.51701	6.21183	6.20188	7.1089	6.51928	6.11183	6.03465	6.68554
AP3S1	9.6467	9.1584	9.0536	9.1741	9.17765	8.88074	8.93654	9.55518	9.24031	8.86294	8.93956	8.91734	8.97423	9.22238	9.04083	8.79677	9.3879	8.81695	8.88707	9.28414	8.90439	8.70998	9.02827	8.84811	9.2924	9.22032	9.08576	8.82708	9.13095	8.83154	9.42454	8.97086	9.16639	9.07489	8.97955	9.15426	9.27325	9.32998	9.59873	9.4339	9.1059	8.93654	9.07673	8.88074	8.87764	8.9936	9.08923	8.99139	8.96049
AP4B1	5.77761	5.68369	5.9297	5.6478	5.91887	5.53607	6.01828	5.61367	5.91194	5.45391	5.73037	5.73709	6.10598	5.57694	5.66026	5.75795	5.26869	5.55754	5.75718	5.87893	6.1445	5.89582	5.77796	5.57091	5.76063	5.89649	5.87203	5.37496	5.51257	5.00104	5.9399	5.73072	5.64094	5.69304	5.7288	5.32121	5.21946	5.36068	5.95372	5.80475	5.73211	5.40277	5.80929	5.67288	5.77146	5.65817	5.892	5.723	5.51767
AP4E1	4.60625	4.32402	4.61311	4.03217	4.76896	4.40039	4.78347	3.81253	4.79109	4.28834	4.65713	4.2722	4.38542	3.74039	3.896	4.79833	4.96781	4.37695	4.30795	4.09005	4.31843	4.32973	5.14841	4.29398	4.33681	4.31843	4.48471	4.65866	4.19737	3.98374	4.79623	4.64784	4.92384	4.16195	4.55535	4.16914	3.6744	4.12761	3.80457	4.46444	4.17002	4.3083	4.40907	4.35236	3.95169	4.36943	4.17704	4.15388	4.568
AP4M1	4.70624	5.64265	5.46203	4.66613	3.55644	3.7949	2.55785	4.79193	5.38648	4.35558	5.42297	2.78253	5.25181	3.46507	3.85459	5.24634	4.88371	5.71907	4.87028	5.10248	4.50254	4.0295	4.31269	4.54648	4.35813	4.41132	3.27405	4.57193	5.33943	5.8228	4.96902	3.95258	4.59712	5.33914	5.63378	5.65063	5.55069	4.86277	5.11638	5.20599	5.43707	4.64022	5.10797	6.04325	5.33035	4.97779	4.55162	5.44826	5.32706
AP4S1	5.58145	5.82105	5.95334	6.12001	5.73532	5.64845	5.52011	5.6904	5.94854	6.02314	6.00039	5.47496	5.31133	5.4415	5.1585	5.74511	5.64437	5.68804	5.62466	5.89929	5.24964	5.70121	5.30945	6.20151	5.86124	5.8245	5.92269	5.77731	5.77957	5.64709	5.69273	5.64164	5.62224	6.06068	5.71454	6.09838	5.70891	5.88218	5.82137	5.7749	5.35987	5.93251	5.62703	5.66424	5.45728	5.55556	5.49804	5.34285	5.21465
APAF1	1.48573	1.73941	1.33042	1.96436	1.35147	2.64383	2.3642	1.71344	3.25683	0.935348	3.10347	0.161215	1.42417	1.26196	1.33141	2.29719	4.14754	1.76708	0.634005	1.21917	0.955334	1.44729	2.39843	1.27165	1.01391	1.97346	2.04878	1.64392	1.6589	1.69563	1.7087	1.74563	1.63447	1.68673	1.64907	1.93875	1.64232	1.65658	1.67321	1.66965	1.66744	1.6589	1.70025	1.80475	1.67024	1.80634	1.64677	1.64175	1.6294
APBA1	1.36297	2.96191	3.54346	2.57109	2.16049	1.20266	2.33987	1.33533	3.52049	1.92298	2.02077	1.78166	2.70296	1.36196	2.8015	2.09368	1.00697	0.9678	3.17199	1.48122	3.01123	0.781656	1.47528	1.68189	1.3742	1.90354	1.7986	1.79933	3.20764	1.85029	1.86645	2.63969	1.77145	1.84264	2.37033	2.18388	3.79702	3.42737	3.23099	1.82096	1.81734	1.7986	3.30247	1.99754	3.57651	4.38453	1.79318	1.79318	2.0174
APBA2	0.335372	1.56971	2.24491	2.54773	1.05598	1.42509	0.91541	1.63203	0.923292	2.8066	0.605982	3.06109	1.41157	2.10085	1.37471	1.42417	1.13477	2.73227	1.06239	2.23843	1.04948	0.612624	1.28772	1.70025	0.73498	1.37952	1.57601	1.57154	1.59194	1.62886	1.64347	1.67495	1.56914	1.62127	1.58173	1.83832	1.57601	1.59073	1.6045	1.60974	4.47368	1.59312	4.47496	5.84652	1.60562	1.73293	3.07312	3.89426	1.5664
APBA3	5.20988	5.24471	5.09867	5.39023	5.31704	5.74085	5.29474	5.6235	4.91201	5.03491	5.18962	5.19743	5.22966	5.13392	5.49971	5.62426	5.37171	5.84235	5.45761	5.93251	5.37824	5.20565	5.45315	5.50002	5.09034	5.54955	5.40782	5.24471	4.676	5.09867	5.5041	4.93872	5.51522	5.22746	5.24042	5.31857	4.90296	5.39537	5.1994	5.25704	5.78936	5.1464	5.81931	5.6559	5.528	5.27846	5.59681	5.46095	5.65925
APBB1	4.16868	3.10938	4.87318	4.23891	5.87392	3.35571	5.18106	3.01217	4.61604	1.91016	4.2118	3.32165	5.70602	4.47878	2.65444	4.58567	3.77993	4.82563	5.61013	4.27313	3.67036	3.24098	4.15556	4.68808	4.81318	5.18681	1.66166	6.05823	4.97503	1.71407	1.72776	6.07066	1.65473	1.70692	6.07465	1.97239	5.64064	3.16269	1.69367	1.69429	6.38144	5.90296	5.75675	6.85269	6.66884	5.63177	6.30493	6.52766	6.93742
APBB1IP	3.38329	3.01573	1.24882	1.89866	3.03262	1.51689	4.40264	4.27313	1.61956	1.37184	1.74381	0.741946	1.16577	1.61956	2.69436	1.43727	6.36728	1.49327	2.91467	1.60504	1.07833	1.49563	1.7401	1.27274	1.11146	3.03775	3.93685	1.69076	1.70561	4.31574	1.75322	2.63382	1.68017	1.73495	1.69682	4.33999	1.69301	2.97844	3.61034	1.7186	4.56029	1.70208	1.74735	1.86199	1.71655	4.56589	1.69429	1.69128	4.34877
APBB2	6.48373	6.39987	5.44932	5.5957	5.991	5.79185	5.86371	6.3206	5.52115	5.61517	5.67222	5.63073	5.98313	5.87354	6.21121	5.57246	6.01159	5.68627	5.06658	6.02254	5.94379	5.81448	5.7802	5.48875	6.13864	6.1591	5.31975	5.62909	5.81134	5.90065	6.50206	6.01679	5.91507	5.86089	5.54955	5.56349	6.10305	5.6625	5.76936	6.43009	5.86879	5.61112	5.99226	5.69693	5.62909	5.79892	5.86949	5.23725	6.09627
APC	5.08292	5.4763	5.59306	5.35556	5.42827	5.47025	5.47598	5.54395	5.59754	5.54437	5.85312	5.69005	5.34661	5.51981	4.2421	5.72125	5.57344	5.43225	5.16468	5.26447	5.19743	5.33561	5.87392	5.29518	5.33975	5.40049	5.22588	5.5569	5.51558	5.73	6.04846	5.50718	5.21502	5.38764	5.13209	5.41153	5.51767	5.37644	5.00941	5.49804	4.34279	5.25481	4.17891	5.08403	4.85845	5.00496	5.01506	4.40664	5.03736
APC2	2.91758	3.64768	1.48627	2.00865	3.34256	1.94039	1.36831	1.47581	2.10478	3.22111	3.92405	2.9539	0.968427	3.75799	1.32773	2.70417	2.00306	3.36853	1.96544	1.69367	1.58955	1.67212	2.4971	3.8031	0.983194	1.0254	2.14816	1.02887	2.53481	1.08487	1.11496	3.43936	1.03864	1.09463	3.45744	4.33139	1.05651	1.07037	1.07934	1.07994	3.01926	4.42759	4.36319	4.62403	3.75799	4.44067	1.04343	1.03384	2.86228
APCDD1	7.05503	7.26889	7.17741	6.59594	7.05232	6.92919	6.58996	7.07319	7.11276	7.23016	6.91695	6.85219	7.98012	7.89294	6.65688	6.73323	7.47309	7.07548	6.08913	7.40554	6.39912	6.70097	6.52044	6.08988	7.19266	6.43854	6.99941	6.69068	5.98527	6.08505	6.28769	7.01477	6.33116	6.57687	6.60923	7.58348	6.71499	7.78065	6.01273	6.3645	6.5607	6.25189	7.29442	7.84519	7.02566	8.2791	6.39232	7.28701	7.12112
APCDD1L	1.18717	3.48235	1.45358	0.6972	1.46172	2.93292	0.566376	0.658849	0.799763	0.215381	1.23159	2.04878	1.39038	2.15207	2.19537	1.98163	1.12849	1.4403	1.6284	3.54122	0.922019	1.07148	0.122628	0.184664	2.64699	1.42114	1.39082	1.37325	1.4012	1.43332	1.45466	1.48173	1.37325	1.42659	1.38504	3.33908	1.38703	1.4022	1.41855	1.4201	1.40459	1.40812	2.40327	1.53804	1.41303	1.52463	1.39344	1.37848	1.3758
APCS	3.76957	4.51988	4.20184	4.69316	3.26696	4.86681	3.4564	4.2122	3.8924	4.71182	3.25747	5.0919	1.14402	3.27666	3.93163	4.34046	3.52591	2.71474	3.7829	4.16825	4.9058	4.52736	3.54346	1.88164	3.60979	3.85027	3.56546	2.73894	4.99226	4.62453	2.6841	4.85805	3.08829	2.76164	3.52926	3.88437	3.61179	2.29982	-0.847811	4.08738	3.81604	4.73652	4.16413	4.56029	4.77348	4.3862	2.77821	4.36186	4.50176
APEH	5.81727	6.28536	7.0608	6.88517	6.73161	7.01047	6.63703	6.62259	6.57378	6.84969	6.67358	7.43491	6.84598	7.50141	6.65942	6.66192	6.06001	6.71834	7.37214	7.30541	6.50519	6.91017	6.15647	6.72969	6.77843	7.01803	6.86934	6.83275	6.5691	6.8894	5.92468	6.76256	6.86606	6.69331	7.02658	6.39076	6.66718	6.52284	6.20366	6.14161	7.04608	6.98484	7.26355	7.24632	7.22551	6.9884	7.26674	7.31589	7.13472
APEX1	8.64682	8.71762	8.45297	8.49878	8.54676	8.49329	8.44501	8.50198	8.56777	8.70181	8.62917	8.38119	8.59601	8.56865	8.2651	8.64051	8.61677	8.25281	8.59601	8.33188	8.70856	8.26891	8.74423	8.2895	8.84957	8.82415	8.76273	8.71148	8.66062	8.76957	8.62053	8.72562	9.01447	8.58864	8.55333	8.09366	8.81695	8.65351	9.01084	8.59204	9.10755	8.90287	8.33956	8.4073	8.49024	8.49136	8.7408	8.67789	8.80707
APEX2	5.40747	5.41268	5.43184	5.36588	5.11805	4.91902	4.57106	5.34579	5.27561	4.95781	5.4194	5.3869	4.9629	5.47322	4.96361	5.38468	5.55144	5.24042	4.7597	4.64022	5.86879	4.85231	5.10021	4.92468	4.91603	5.04732	4.96602	5.00022	4.55725	4.99143	5.06133	4.61515	5.04095	5.29443	4.39867	4.69759	5.07337	4.67135	5.20988	5.20714	5.40277	4.8539	5.6098	5.39712	5.34132	5.68836	5.97804	5.43263	5.11379
APH1A	5.72485	5.8127	5.7149	6.0672	5.28454	5.94993	5.28132	6.03823	5.10835	6.01892	5.48342	6.08505	5.51188	6.00515	4.97438	5.46646	6.51508	5.79853	5.14678	6.05063	5.79453	6.08945	5.95227	5.60745	5.42481	6.11961	5.25072	5.9409	5.96327	5.82413	5.40815	5.55144	5.21987	4.95036	6.04402	5.8228	5.47537	5.17467	5.71628	5.2083	6.1449	5.47201	5.68836	5.90477	5.6301	5.86089	5.8828	6.04511	6.03538
APH1B	5.16697	5.10477	4.71258	5.66207	5.23894	4.86406	4.83095	4.80302	4.61478	5.972	4.55034	4.62625	5.2899	5.51123	4.87998	5.06495	6.41234	4.19648	4.86155	5.84616	4.98691	4.95369	5.28685	5.11561	4.5594	4.76008	5.11095	5.24399	5.25368	5.27602	4.87396	4.53343	5.39712	5.3595	4.97244	2.71177	4.95666	5.05967	5.2106	5.15699	5.19371	5.17919	5.40892	5.06331	5.17033	5.18962	5.33561	5.27808	5.32778
API5	6.13144	6.29906	5.84862	6.42447	6.03325	6.13144	6.5178	6.61742	6.20987	6.26635	6.11297	6.33528	6.21876	6.49113	5.94454	6.28089	6.3445	6.23501	6.31937	5.77298	5.95298	5.95658	6.50598	5.61577	6.3645	6.47409	6.23815	6.41234	6.36692	6.30098	6.69068	6.23684	6.16517	6.26929	6.25438	6.27388	6.36495	6.12256	6.54426	6.54061	6.0991	6.21664	5.81032	6.19779	6.02379	6.14051	6.03893	6.1142	6.03261
APIP	7.67397	7.78485	7.02566	7.55458	7.72488	8.16753	7.35235	7.1886	7.11763	7.0031	7.49534	7.25427	7.21099	7.36689	7.48255	7.13014	7.34957	7.1353	7.03903	7.30135	6.90709	7.80755	7.37214	7.3745	8.48916	7.3597	7.45171	7.62307	7.74386	7.46785	7.35349	7.62445	7.14754	7.40211	7.38106	6.96255	7.78617	7.09105	7.28851	7.02614	7.44773	7.37098	6.98751	7.32068	7.55623	7.19401	7.33636	7.36624	7.01139
APLF	3.92634	4.49959	4.06815	4.64022	3.78534	4.26782	3.80203	3.92831	3.77475	4.39572	4.26951	3.49052	4.07182	4.79364	3.56438	4.50804	4.78858	4.07378	3.57707	3.98685	3.43561	3.69253	4.72102	3.94844	4.26866	3.92684	3.44101	4.457	4.42171	3.13083	4.42036	3.70254	4.82765	4.33549	3.78381	4.46544	4.07694	3.92441	4.69966	3.52492	3.82471	3.95215	3.89133	4.7026	3.99386	4.58693	3.00392	4.62197	3.17721
APLN	6.18346	5.93074	7.42185	6.37869	7.99864	7.23607	6.17997	6.60628	7.0666	5.96358	6.87516	6.4053	5.81338	7.14713	7.47561	6.16368	5.86693	7.30368	6.68601	7.61074	6.66884	6.76124	7.47241	7.15997	7.17585	7.07128	6.78616	6.62431	6.59069	7.06564	6.91563	5.74053	7.04511	7.17844	6.0672	6.23889	6.8729	7.4708	6.55949	6.33381	6.25297	7.16185	7.05503	6.03745	6.95034	5.93146	7.14664	7.03763	6.0306
APLNR	5.97558	5.94885	5.96092	5.4831	5.76385	6.08433	6.28501	6.7001	4.97157	4.1859	6.0999	6.1157	4.36282	3.16443	6.70341	6.25036	4.06777	6.72412	4.53122	6.06105	7.26457	6.91981	6.98302	5.40384	7.69519	5.02315	5.73461	5.27637	5.89337	5.45271	6.34799	5.6559	6.6406	6.35779	5.34512	6.59722	6.1045	6.64841	6.54345	7.07403	6.89172	5.24326	6.48922	6.93173	6.61004	6.04473	7.09647	7.04873	7.08136
APLP1	4.22958	4.66802	5.71726	6.07658	3.79794	4.82369	5.94024	6.62619	5.05499	5.5141	4.28834	6.45772	5.76864	6.60187	4.57819	5.54356	4.32324	5.78232	6.24534	5.29028	2.2611	4.48188	4.74239	6.53981	5.33355	3.78032	5.567	4.93837	4.2835	1.04717	5.59501	4.02182	5.62808	2.61293	3.73836	4.54648	3.48011	4.17985	4.20422	4.44292	4.17224	5.62971	6.13325	5.60709	2.24248	5.83015	5.43337	3.75103	5.80402
APLP2	8.15912	8.488	8.09968	8.4114	8.28099	8.52909	8.63661	8.8039	8.26798	8.60889	8.20809	8.70998	8.68032	8.61279	8.13486	7.98649	8.33862	8.32095	8.11529	8.20174	8.25483	8.43668	8.4791	8.4387	8.56653	7.88002	8.23809	8.36507	8.7218	8.39916	8.22402	8.54437	8.41437	8.15044	8.6829	8.254	8.47608	8.19029	8.55825	8.23809	8.254	8.32804	8.36868	7.96434	8.43668	8.20703	8.31595	8.2362	8.7189
APOA1	6.79675	6.67085	6.08061	6.81908	6.33752	5.42827	8.43752	8.95176	7.00945	7.58962	6.15144	7.17585	6.98625	6.50954	5.88344	8.47284	6.55652	7.41646	7.18666	7.13941	4.71935	6.75489	5.45761	7.0207	6.34092	4.95455	7.80207	6.62394	7.32834	6.1274	4.16591	5.85682	5.89686	6.60719	6.8899	6.19254	7.34198	7.70974	6.63379	5.82739	5.21313	7.90679	6.89395	8.14972	6.32826	7.74193	7.24531	6.1274	5.75858
APOA2	2.43549	3.14879	0.621454	3.17079	1.82624	1.43922	1.89669	0.710896	1.77072	2.45453	1.10681	0.688757	1.55439	1.56308	1.59138	0.560386	0.153905	1.67556	3.01356	1.10396	1.75931	0.960564	1.95871	0.198179	1.35962	2.88291	3.70044	1.20474	1.23427	3.73426	1.28772	2.65857	2.00418	2.11759	1.21814	3.27467	2.72533	1.23734	3.72481	1.2577	3.35632	2.64809	2.53032	2.76164	1.2577	4.02005	1.21704	1.21082	1.33489
APOA4	3.23732	1.61422	2.33023	2.07042	4.45265	4.77876	1.71719	1.32403	3.08763	1.16793	5.35594	1.07375	2.87429	4.8948	3.50849	3.46165	4.09299	3.03061	3.80012	2.7437	4.02487	3.52315	2.28904	3.21243	3.30797	3.13147	4.11198	5.15556	0.659983	4.14068	4.61946	3.5332	4.17573	0.680478	4.84988	5.01506	4.60746	4.73234	3.43883	4.28713	0.661045	3.8514	5.03322	4.50959	3.38658	3.99094	4.53163	2.51153	0.644726
APOA5	1.76254	1.6623	3.54848	4.86681	5.03176	3.3539	3.26511	4.09789	5.44502	4.70402	3.79542	2.76309	4.26649	1.83445	3.76657	3.21243	2.27586	2.43549	4.33863	2.05302	5.09113	3.41222	3.76207	3.79234	4.18718	4.10363	3.35507	4.73301	5.00377	5.09078	3.8924	4.9986	2.69511	4.60204	4.33504	4.35062	-0.218295	3.54398	3.61598	3.73836	5.33561	2.96547	4.47721	3.96156	4.66019	3.6824	3.04412	5.05243	2.7437
APOB	3.70744	2.28522	5.27449	3.75697	5.64128	5.51054	5.50371	3.38908	5.2849	5.63452	4.58869	4.57106	5.08403	5.21028	3.25572	5.06539	6.61986	5.98496	5.42591	5.06373	3.8999	5.42516	4.57643	3.90282	3.17199	4.78433	4.57106	3.27726	3.93922	5.4553	5.09034	4.44384	4.95406	5.06042	4.94846	5.13008	4.48515	0.86993	4.72195	4.66321	5.06821	4.80852	5.05621	5.24287	4.48051	5.45197	5.53141	4.93707	4.81241
APOBEC1	1.53367	3.06302	1.67092	3.63472	3.61076	4.72102	1.63559	0.895628	0.906627	2.70296	4.05365	5.10986	3.20873	0.94923	1.81363	1.86357	2.99411	2.73621	2.68203	1.3822	1.86645	2.60564	1.80475	4.04296	1.98818	3.68823	4.11378	3.91326	3.66837	0.577138	3.48869	0.628927	0.574466	2.97447	4.21879	0.782313	0.564963	1.77282	3.24723	3.21502	0.58873	3.44809	4.60379	0.71469	3.1569	2.58768	3.47604	3.14613	3.27535
APOBEC2	8.97086	9.32998	9.03545	8.94999	9.04815	9.25088	9.54229	9.4476	8.49136	8.87028	9.70652	9.44075	8.94467	9.3039	8.56417	9.5194	9.54229	9.56348	10.2073	9.63323	9.14495	9.08576	8.98125	8.97582	9.06945	9.54229	9.64393	9.52365	8.87627	9.32314	9.09863	9.09268	9.49345	9.91082	9.56103	9.2971	9.37373	9.18891	9.46536	8.76957	9.54803	9.85726	10.2241	10.1583	9.5086	9.75011	9.91504	9.59873	9.16824
APOBEC3B	2.9039	3.54027	4.57233	4.82925	3.97949	4.27707	4.64904	4.26782	4.61946	4.09156	4.66972	5.09904	4.50135	4.71885	5.77146	4.33305	4.94396	4.39653	5.11882	2.84211	4.73145	4.46808	5.05967	4.14653	4.35423	5.13131	4.29731	4.71137	4.45778	5.0366	4.5291	3.98964	4.36895	4.92181	3.72125	3.62726	3.4185	3.55545	5.1417	4.54827	4.17936	4.70896	4.27001	5.11419	3.97851	4.74784	4.45735	4.75249	3.818
APOBEC3C	6.40846	6.23769	7.03048	6.61788	6.69541	6.55058	6.63893	6.33793	6.45219	6.27463	6.60676	7.15277	6.97453	6.82522	6.58517	6.3002	6.44588	6.29761	6.52157	6.22456	7.37167	6.73993	6.43634	6.4274	6.68941	6.53123	6.56826	6.62259	6.54384	6.33159	6.38891	6.81618	6.62133	6.49401	6.61656	6.29906	6.38371	6.27647	6.28577	6.62546	6.69068	6.88037	6.80669	6.39263	6.40735	6.17189	6.45372	6.72102	6.70506
APOBEC3D	4.69485	5.37206	4.77134	5.47994	5.04181	5.86244	5.17033	5.29297	3.60441	5.56202	4.17891	5.05243	5.25136	5.50188	5.48247	4.73928	5.40355	4.36895	5.82486	4.78002	5.14718	4.80227	4.64408	5.26378	5.55413	4.72453	4.75733	5.55556	4.12139	5.69172	5.30247	5.05802	5.30907	6.03538	5.19075	5.42895	5.02236	3.46977	5.35369	5.51558	5.24326	5.15661	3.84497	4.25745	5.928	4.87883	4.989	5.43634	4.3455
APOBEC3F	4.11465	4.67272	4.79663	4.66761	4.57772	5.08368	4.50176	4.55806	4.676	4.82765	4.44339	4.68122	4.33093	4.67135	4.51368	4.98472	5.13209	4.8755	4.9399	4.08223	4.46851	4.76209	4.89313	4.64824	4.81635	4.57603	4.56672	4.96691	4.96001	4.23129	4.73018	5.08762	4.62026	4.6972	4.54125	4.88616	4.78476	5.14757	4.6843	4.69924	4.50506	4.67565	4.67969	3.98232	4.30017	4.73145	4.51246	4.26951	4.06101
APOBEC3G	5.66207	4.77016	4.52647	4.91646	5.47598	4.42673	6.0784	5.91768	5.11676	5.02618	5.81164	5.38184	5.0185	4.74326	4.30742	5.15101	7.30705	5.85912	4.90891	4.62111	4.53385	5.26869	5.16188	4.99374	4.96126	4.95369	4.82078	5.23459	5.62039	5.33975	5.27808	4.76593	6.04951	6.2588	3.21197	5.28132	4.1354	5.91543	5.10168	4.23396	5.20065	5.66319	6.23851	4.63036	5.54437	5.42762	5.66491	5.39938	5.31242
APOBEC4	1.39798	3.15627	3.13295	3.67627	1.18818	4.15556	3.8445	3.96156	3.39534	3.82766	3.38725	4.46492	3.8237	1.43782	1.97821	4.04722	3.76446	3.2293	3.59178	3.1569	2.10233	4.80723	3.82425	3.3592	3.67391	3.77111	3.32583	3.9711	3.41047	3.11945	4.45386	4.54212	3.07516	3.7223	3.58612	4.26866	3.618	4.34181	3.748	4.457	2.89776	2.01402	2.94308	3.87272	3.70358	3.97378	3.6824	3.25452	3.18068
APOBR	1.55043	4.20516	1.72289	1.95358	1.65027	1.27792	0.881286	1.55916	1.05598	1.18717	1.01697	4.19438	4.21701	2.64699	1.28715	1.10959	1.59847	1.02887	3.8378	3.93163	3.00917	0.899145	0.434087	1.79993	3.18491	2.88211	0.560386	3.10725	3.29465	3.97378	0.597049	2.23592	0.550619	2.66493	2.39716	2.47906	0.53638	0.587293	3.29778	2.76243	3.39242	2.73021	1.79717	4.01482	3.62333	3.68604	3.44595	3.73049	3.28508
APOC1	3.67842	5.77405	5.02618	4.23484	3.88492	4.38922	4.46808	3.74548	4.78046	4.00094	4.3502	4.80972	3.84888	3.27001	5.08798	4.11948	3.66393	3.65995	4.26185	3.93109	4.4366	4.10921	4.21009	3.77385	4.60981	3.19015	3.71297	0.301428	5.5079	3.13433	4.16868	4.40039	4.23838	5.45315	4.33052	4.68004	4.20837	4.17485	3.55545	4.30328	4.79663	4.54125	4.91521	0.429584	5.00302	2.21022	4.90421	3.74441	5.50827
APOC3	0.563299	3.9156	0.181235	1.08603	0.799763	2.27953	0.371782	0.189716	1.45416	1.63142	2.92241	1.60619	2.78171	1.73293	0.874184	1.56411	1.06541	1.0952	1.23469	2.02748	2.54871	1.80847	1.00697	0.238296	0.140616	0.841207	1.39539	1.37848	1.40459	1.43661	1.45943	1.48523	1.37732	3.49261	1.38993	1.63042	1.39292	1.40612	4.21662	1.42462	1.40857	1.41399	1.45416	4.86024	5.1585	1.52964	2.94373	1.3822	1.38004
APOD	9.14108	8.05508	9.05186	9.42208	8.1995	9.03389	8.18767	8.84216	6.99176	8.26715	8.4823	8.7571	8.99551	9.86141	7.67251	9.9672	7.51168	9.26205	7.3136	8.57332	7.44579	9.52849	8.61025	7.60145	6.88898	8.63392	8.7408	8.58864	8.57463	6.45418	7.65416	7.76212	9.19528	7.99633	8.67222	9.73026	8.11999	8.5	9.37161	8.60095	9.61982	8.55001	9.6467	9.56348	9.15084	7.73244	9.35019	10.1155	9.61756
APOE	6.74323	7.75414	5.3488	6.57412	5.23422	6.13748	4.57951	6.13001	5.22132	6.39519	6.05264	6.1274	4.2421	5.29818	7.69862	5.52918	4.78088	5.79683	5.17764	5.6625	5.20176	5.04816	6.65567	6.10666	5.40238	5.61367	4.96221	5.93645	5.82708	5.12577	5.34767	6.15303	6.29869	5.79079	5.34171	7.20144	6.24736	6.04613	5.53643	5.53064	5.03863	5.60911	6.3109	6.23152	7.17891	5.28723	5.87622	6.61826	7.97458
APOF	0.442848	2.87642	0.626502	3.62985	3.06708	2.56278	3.00986	1.15587	2.53369	0.9259	1.02228	4.0107	3.85803	3.08956	2.07291	2.05085	2.44646	2.87716	2.13816	1.71407	0.213519	2.34329	2.46289	1.09065	1.31092	3.48697	0.355709	2.52671	2.90885	3.88783	3.25936	3.19325	1.80407	2.83118	2.20219	2.78842	2.66294	1.91016	2.16874	1.70985	4.04769	2.25583	0.448744	3.63258	3.13012	3.34661	3.23401	1.76062	0.355709
APOH	3.15804	3.85276	2.57944	1.78519	1.61837	3.7435	2.0367	2.58446	2.94162	1.55965	3.84497	3.19325	3.69592	3.61999	2.94233	3.24974	3.16652	3.21307	3.05895	2.85016	3.27239	3.29414	3.25633	2.96907	2.901	3.19456	0.139764	0.134567	0.135641	0.133683	0.137795	0.136618	0.130235	0.132607	0.130235	0.173755	0.138676	0.140616	0.137795	0.130235	0.133683	0.140616	0.154631	0.15731	0.137795	0.162322	0.128661	0.132607	0.136618
APOL1	4.30497	2.59212	3.68502	2.92691	3.69481	0.386451	4.85023	5.48372	1.82704	0.420545	4.15303	1.59312	4.0586	2.71683	2.86747	1.96141	6.85178	1.8099	4.55849	1.81285	3.13083	2.42157	3.8989	2.62392	2.01523	2.20333	3.95558	2.91758	4.19097	1.15419	3.97521	4.676	5.46269	3.31083	4.26693	1.33533	1.12278	3.94119	1.14873	4.41634	5.18844	5.23459	4.60042	3.93163	2.01859	3.46659	2.80574	4.66972	4.66689
APOL2	5.23645	5.18928	5.18646	4.94099	5.34767	4.75368	6.00515	5.35594	5.96249	5.29185	5.35843	5.19819	6.24671	5.60474	5.30172	5.35773	6.00453	5.36026	5.90925	5.49165	5.37422	5.57732	5.59792	5.48986	5.33524	5.58176	5.74165	5.14523	5.68124	5.56634	5.22588	5.78096	5.89553	5.75141	5.23088	5.56837	5.32015	5.41268	5.59162	5.47132	5.35444	5.74542	5.71553	5.89447	5.59374	5.49736	5.7883	5.3709	5.19546
APOL3	6.69494	5.86406	7.25677	6.3236	6.46158	5.63955	7.08136	7.04	6.57773	5.83872	6.85843	6.75943	6.58484	6.07315	5.60777	6.55607	7.37666	6.51188	6.31824	5.8141	7.01579	7.00216	6.46586	6.31051	6.68642	6.52479	6.66192	6.30605	6.6783	6.40958	6.35743	7.27729	7.10938	6.54192	6.62431	6.09366	6.65222	6.89531	6.51884	6.89045	7.6168	6.72656	6.50557	6.72366	7.19401	6.62958	7.40022	7.29442	7.01884
APOL4	1.06417	1.29451	2.94308	3.22676	2.4936	1.53154	1.64447	4.35726	3.29526	4.33052	2.26653	3.03188	2.96829	1.78519	1.6879	3.41676	3.9033	1.67157	3.29047	1.22504	1.26767	1.19958	2.42413	1.60974	1.72776	2.82867	3.62726	2.54871	4.70222	2.63199	2.30361	2.56998	3.76859	0.941631	4.96862	3.6526	2.04976	3.3373	0.928428	3.39983	3.12938	4.79151	4.34597	2.81152	2.95826	3.85459	2.17589	3.40833	2.88855
APOL5	2.30119	2.14231	1.20678	2.15817	1.28365	2.01082	1.24826	1.79521	1.70444	1.44937	2.17478	1.54304	1.33741	2.11606	3.45183	3.52049	3.50629	3.44414	3.63908	3.37089	3.7173	3.62667	3.63648	3.62392	3.73258	3.77067	0.139764	0.134567	0.135641	0.133683	0.137795	0.136618	0.130235	0.132607	0.130235	0.173755	0.138676	0.140616	0.137795	0.130235	0.133683	0.140616	0.154631	0.15731	0.137795	0.162322	0.128661	0.132607	0.136618
APOL6	4.58527	4.26741	5.12351	3.9814	3.64261	4.82526	4.95369	5.05166	3.74652	4.17485	4.58404	4.04867	4.35813	4.62835	4.07283	4.48239	5.98925	4.4677	4.907	4.02229	3.97378	4.51173	4.61311	4.2641	4.23528	4.87807	4.11776	4.67309	3.83167	3.3085	5.53463	3.38658	4.82331	4.37695	4.48608	4.69519	3.72172	4.90618	4.96438	5.02189	5.46009	4.46264	4.42171	4.07694	5.2622	4.9629	5.03364	4.73301	4.18769
APOLD1	9.22238	8.40936	8.07577	7.75615	8.41345	8.04603	8.28013	8.23903	8.31109	7.74121	7.99382	7.46558	8.26891	7.984	8.31801	8.06093	7.66737	7.80401	8.13579	8.46277	8.61416	8.2613	8.14533	7.69723	8.26407	8.14712	8.08914	7.98568	8.20353	7.84723	8.2486	8.10953	8.11177	8.04837	8.01879	8.40936	7.8313	7.83061	8.06093	8.54096	8.57688	8.12884	8.03072	7.65085	8.2971	7.84226	7.9946	7.74265	8.13396
APOM	4.5676	4.52196	4.89118	4.9839	4.61562	4.15031	5.24211	5.15556	5.42626	5.23534	5.2849	4.40438	4.84951	4.85464	4.13191	5.04976	4.1019	4.06337	4.88616	5.18373	4.66142	3.81294	5.13648	5.53898	5.40713	4.64784	4.92468	4.68724	4.90535	4.83734	5.36654	4.24966	4.82045	5.14488	4.28391	4.0714	5.0239	5.13356	4.9418	4.52312	5.10872	5.25518	4.69272	4.9986	5.05206	4.45173	5.11235	5.05882	4.49002
APOO	8.46182	9.07489	9.50381	9.72754	9.58846	9.20968	9.29913	9.56819	9.28006	9.2185	9.04083	9.17956	9.45778	9.94286	8.51223	9.44544	9.00444	9.4339	9.47764	9.39241	9.55518	9.53965	9.99778	9.38268	9.71494	9.85362	9.64169	9.40258	9.42667	9.06945	9.56348	9.40765	9.61515	9.07833	9.18655	8.69363	9.68565	9.58345	9.62286	9.03545	9.54504	9.69649	9.6128	9.61982	9.59873	9.07139	9.64975	9.57794	9.46265
APOOL	7.28308	7.31034	8.09543	7.67621	7.9542	7.7568	7.92469	7.38698	7.79925	7.6053	7.75075	7.40022	8.05933	7.75142	6.96024	7.61368	7.11539	7.67117	7.43706	7.3354	7.8486	7.85711	8.04688	7.31034	7.35293	8.03375	7.39897	7.74121	7.96371	7.80542	8.66461	7.53402	7.86231	7.62445	7.51592	7.50914	7.39054	7.04648	8.14438	8.15044	7.68552	7.39617	7.03855	7.63237	7.55164	7.58667	7.61611	7.39158	7.43039
APOPT1	6.35704	6.89395	6.76124	6.86022	6.87163	6.94396	6.78388	6.18414	6.73284	6.68554	6.55403	6.1831	6.62864	6.83322	6.9352	6.81908	6.34092	6.5335	7.16088	6.29021	7.05117	6.89086	6.85307	6.81231	6.48838	6.57378	6.86198	7.12161	6.58517	6.61826	6.17444	7.20897	6.49843	6.44095	6.89342	6.78135	6.86699	6.94396	6.30179	6.68131	7.22868	6.87906	6.23684	6.72794	6.51971	6.55692	6.67469	6.84873	6.92356
APP	8.53733	9.42454	8.76115	9.31711	8.30762	9.25974	8.6062	9.60425	8.38544	9.6128	8.70726	9.63603	8.32279	9.39486	9.63323	8.62674	8.95344	8.77079	8.57332	9.36892	9.11111	9.38034	9.04274	9.31711	9.28972	9.05004	9.18655	9.02998	9.33206	9.06762	9.4476	8.75973	9.63097	9.19972	9.17233	8.80838	9.11469	9.06304	9.34121	9.58078	9.22901	9.01447	8.27705	8.254	8.99933	8.78362	9.16824	9.08576	9.1429
APPBP2	6.21299	6.28471	5.83755	6.09097	5.98419	5.64968	6.08682	6.19064	5.78232	6.2832	6.05329	5.84054	5.90527	5.99789	5.42324	6.09871	5.94128	6.01315	6.06851	5.83796	5.83796	5.91725	6.29052	5.88447	5.87166	6.11532	5.82346	5.99333	5.93385	6.01491	6.22608	6.02455	6.00176	5.96327	6.03962	5.75675	5.84412	5.73709	6.20439	6.35246	6.03124	6.05197	5.71246	5.70671	5.99624	5.74826	5.87759	5.86803	5.98779
APPL1	7.4251	7.82413	7.28098	7.75743	7.88835	7.88154	7.67873	7.38046	7.57387	7.86313	7.7015	7.60828	7.65282	7.49085	8.06426	7.41531	6.95113	7.13667	7.40211	6.99176	7.36141	7.52302	7.3894	7.76289	7.46785	7.26355	7.44703	7.54046	7.88403	8.02902	7.55398	7.32996	7.73292	7.65478	7.55221	7.65869	7.38549	7.2276	7.8394	7.6979	7.1003	7.82907	6.73366	7.15832	7.3431	7.1381	7.26128	7.18537	7.55922
APPL2	5.78976	5.95029	5.98456	5.63039	6.09366	5.9693	5.8601	5.36548	5.86879	6.00646	5.92578	5.61367	5.64641	5.5603	5.50299	5.29069	5.6054	5.6841	5.71454	5.63813	5.99757	6.13791	5.33602	6.2	5.52296	5.38394	5.34326	5.63489	5.5458	5.91725	5.75965	6.00453	5.0962	5.22667	5.91002	4.91848	6.00795	5.43002	5.02353	5.53024	5.30984	5.19654	6.329	5.80652	5.96397	6.01198	5.53573	6.4856	5.95803
APRT	5.83615	5.65737	5.94603	5.6018	6.3135	5.95264	5.85682	6.321	6.18772	5.16768	5.56064	6.02489	6.14923	5.87488	7.31314	5.75593	5.63342	6.19392	6.65645	6.56393	6.33343	5.8855	5.67253	6.42046	6.37044	5.67952	5.91686	5.99443	5.21819	5.9383	5.25972	6.38931	5.79998	5.71591	5.95631	5.74479	6.19704	6.32973	5.51981	5.52882	6.32784	6.48878	6.63703	6.28052	6.34213	6.2191	6.81033	6.85939	6.62581
APTX	5.61759	5.74198	5.71693	5.69172	5.90366	5.69137	5.99966	5.513	6.11681	5.90743	5.69304	5.65063	5.8402	5.5458	6.0153	5.84086	5.4777	5.65625	5.92831	5.64128	5.52189	5.52624	5.88826	6.05855	5.6552	5.65096	5.73429	5.78724	5.83273	5.69372	5.95631	5.85489	5.7332	5.41902	5.53498	5.8601	6.01828	5.84447	5.96169	6.13906	5.61577	5.50527	5.83195	5.71693	5.92683	5.93503	5.79791	5.70671	5.43373
AQP1	8.61279	9.03745	7.98174	8.18356	8.40844	8.63913	8.5477	8.86143	8.20174	8.63776	9.20775	9.58345	7.68233	8.0876	8.38334	8.39298	8.7189	8.79966	7.98012	8.65098	9.13282	8.78996	8.8212	7.46401	8.9936	8.32804	8.28593	8.06516	7.96739	8.57332	7.90171	8.96414	8.60512	9.18214	8.69506	8.24744	8.0876	8.57814	8.16262	8.24464	8.47698	8.09	8.83463	9.02827	9.31057	9.16246	9.11278	8.82274	8.83154
AQP10	0.971437	3.4981	2.56898	3.67842	1.54536	2.60171	1.98386	3.92634	1.41111	2.30621	1.37031	3.31347	3.71928	-0.633246	2.43221	3.44869	0.923887	0.2288	2.95901	0.967137	0.137795	1.63891	1.96436	3.22304	1.32057	2.35472	1.2774	1.26091	1.29023	1.31825	1.33962	1.36656	1.26196	1.31953	1.27549	5.20133	1.27495	1.28925	1.30222	1.31038	4.3436	1.29305	5.67222	4.55806	4.66761	1.41806	3.77521	4.87592	5.90711
AQP11	1.88936	1.86719	2.23329	2.07399	1.85118	1.70025	1.65598	1.73293	1.59073	1.59908	1.66965	1.6284	0.161215	2.00865	0.893035	1.24772	1.5209	1.61487	1.63329	0.815696	1.52259	1.85427	1.0283	1.83962	0.227362	2.10363	1.86557	1.85854	1.88086	1.93103	1.92915	1.97346	1.83264	1.91102	1.85362	2.26914	1.87062	1.87146	1.88086	1.88443	1.88691	1.85681	1.91454	2.06701	1.87556	2.06206	1.85602	1.85427	1.82939
AQP2	2.37756	4.22692	1.84191	2.91036	2.69997	4.8873	2.309	3.14675	1.81146	4.08319	1.61606	4.09391	3.77521	4.24032	2.86609	3.50791	2.73323	3.53149	3.13433	3.28685	3.26069	2.52903	2.5382	2.77348	4.2122	1.85362	3.76549	4.0107	3.6489	3.42146	4.16332	3.97851	1.09768	3.23979	4.21701	5.07139	3.30568	2.35741	4.0983	3.97234	4.40808	1.13636	3.41288	2.72715	3.75751	3.41288	3.57167	1.09717	4.05909
AQP3	5.288	5.42047	5.12894	5.3074	6.89791	6.28089	4.62995	4.82765	6.06328	5.68971	4.07746	4.21055	6.18959	6.17584	4.87807	5.76522	6.25583	5.75356	5.76132	6.53046	6.05063	4.71849	5.2083	6.06476	5.00302	4.67057	4.89647	4.72977	5.74764	5.13824	7.03612	5.42591	6.55167	5.78724	6.33493	6.14596	5.35134	6.32326	5.54317	5.6984	5.92302	6.47245	5.14718	5.52226	4.94765	5.82908	5.50678	6.06657	6.85939
AQP4	1.40497	3.94654	4.70765	3.80964	4.68852	5.88861	5.22746	4.6012	4.32973	1.15253	5.93385	3.5744	1.3811	3.14675	5.33437	3.88058	4.09746	5.90366	3.2466	4.32685	4.19097	5.27307	5.04941	5.49926	1.33631	6.08644	1.43727	3.90853	2.21544	4.72535	5.48101	2.91293	3.2527	4.71258	4.27398	3.9814	2.10363	4.83095	4.29818	2.41636	4.87952	5.572	2.52574	5.6018	4.78172	5.23214	3.71086	5.81134	3.38395
AQP5	1.01875	0.747032	0.159331	2.29719	0.925199	2.74823	1.51138	0.944292	2.85663	1.43922	0.630184	1.35033	1.56693	1.90443	2.33643	0.231852	0.371782	1.72363	1.75646	0.510987	1.32403	1.70506	0.287162	1.50924	1.10272	1.66744	1.66863	1.6691	1.68614	1.72107	4.44628	4.04682	1.6623	1.71284	1.67495	1.98272	1.67212	1.68251	1.69909	1.70085	1.69496	1.68251	1.72903	1.83445	1.69682	1.83605	1.67321	1.6691	1.65658
AQP6	3.27239	2.58768	4.82331	4.31574	5.26055	2.60752	4.07051	4.2863	3.89044	4.32402	3.88295	1.84115	4.83969	3.28508	4.99829	4.68166	4.47538	4.71048	4.66408	4.66142	4.83734	4.53084	4.69802	4.66096	4.73272	4.6368	0.139764	0.134567	0.135641	0.133683	0.137795	0.136618	0.130235	0.132607	0.130235	0.173755	0.138676	0.140616	0.137795	0.130235	0.133683	0.140616	0.154631	0.15731	0.137795	0.162322	0.128661	0.132607	0.136618
AQP8	1.07037	0.851127	0.322491	0.93602	1.01809	1.30275	0.472843	0.294409	0.787032	0.21475	0.897644	1.7401	0.234176	1.27692	0.927268	0.701168	0.110557	0.0350701	0.937362	0.012686	1.22546	0.6506	0.518006	0.497266	0.479233	0.243614	1.18107	1.15587	1.18107	1.21495	1.2406	1.26461	1.16061	1.21178	3.7435	1.39482	1.17623	1.18767	1.20225	1.20734	1.19842	1.20061	2.39991	1.32211	1.20639	1.31466	1.17073	1.16168	1.16955
AQP9	4.03217	0.227362	0.630184	1.4732	4.47966	3.02073	4.60082	4.03308	0.848169	1.25823	-0.014886	-0.0125548	1.13307	1.29169	1.14557	1.08487	5.35773	0.270561	4.54686	1.27165	1.29216	1.52918	1.26722	1.40765	1.11207	1.81363	4.36007	0.631275	2.75617	4.25332	0.699907	3.16652	0.654704	0.689807	3.67842	0.862393	0.653486	4.63292	2.75617	0.683599	2.8397	2.81663	2.48427	2.83202	2.9039	0.797129	4.48608	3.24223	0.654704
AQR	5.68192	5.32083	5.38072	5.07139	5.52153	5.14125	5.44713	5.35256	5.18223	5.27767	5.24996	4.98199	5.40607	5.22313	5.09671	5.42895	5.63748	5.27112	5.21028	5.29407	5.04265	5.44502	5.79683	4.98011	4.94555	5.4415	5.2091	5.45761	5.59229	5.14918	5.61944	5.10214	5.44826	5.1994	5.39274	5.10911	5.11095	4.84613	5.36405	5.50338	5.19693	4.97929	5.27051	5.36978	5.17073	5.41115	5.22467	5.12392	5.58145
AR	6.58039	6.2678	6.86567	6.03707	6.46055	6.29794	6.84643	6.02455	7.20301	6.77006	6.76644	7.02566	6.56424	6.45185	6.4104	6.95753	5.82315	6.92874	6.41948	6.70819	7.10733	6.5155	6.29906	6.93133	6.50709	6.78472	6.60844	6.65986	6.69671	6.68041	7.26509	6.85758	6.65298	7.20746	7.13157	7.09297	6.55949	6.57345	6.8721	6.47089	6.76962	6.9134	6.84339	6.45009	6.66321	7.34575	6.60719	6.64686	6.6581
ARAF	5.67123	6.4649	6.31175	6.26672	6.40919	6.80917	5.81448	5.84579	6.55403	6.27305	6.09627	6.45092	6.20621	6.64493	5.90033	6.26891	5.62734	6.24205	6.5632	6.06763	6.62742	5.97101	5.99443	6.20227	6.33611	6.54736	6.07108	6.7275	6.16206	6.62472	5.65165	6.67715	6.05129	6.49364	6.65092	6.3445	6.35933	5.8724	5.92613	5.98347	7.0342	6.64365	6.46326	6.75615	6.68601	6.75201	6.86365	6.85758	7.02951
ARAP1	5.36654	6.05197	5.28215	5.81548	5.34698	5.46995	5.51701	6.23964	5.45117	5.90296	5.66207	5.7267	5.29857	5.90527	5.28371	5.24517	6.66718	5.27808	5.77835	5.42934	5.23687	5.63526	5.05764	5.44468	5.61013	5.46681	5.31934	5.7053	5.13685	5.63308	4.41132	5.62942	5.08292	5.08841	5.69172	5.32083	5.44977	5.15966	5.21502	4.68208	5.92335	5.62383	5.6559	5.54955	5.73072	4.99419	6.00762	5.87622	5.92302
ARAP2	3.59811	3.06708	4.42925	2.94907	3.75651	3.8415	3.93208	3.73836	3.05471	3.52544	2.09466	3.28632	4.26823	4.18678	3.14816	3.6489	6.19425	3.47495	4.33228	3.43104	3.23144	3.98052	3.68404	3.46116	3.64441	3.69481	4.16591	2.84852	4.09391	3.24843	3.34949	3.70795	4.56375	3.01296	2.97587	4.14029	4.25295	3.70691	3.31462	4.77427	3.54751	2.33269	3.05011	3.56383	3.93347	2.83456	3.52544	3.38052	3.42513
ARAP3	5.93609	5.84692	6.27267	5.95071	5.61289	5.18844	5.67589	5.24707	5.23605	5.35369	5.61795	5.85249	5.75829	5.66148	6.18074	5.49453	4.87318	5.21132	5.44222	5.32633	5.98527	5.7427	5.53898	5.68305	5.96829	5.36978	5.05132	5.45013	5.95694	5.03248	5.31347	4.93409	5.08762	5.60506	5.72633	5.58918	5.74858	4.98978	4.87845	5.81832	5.43963	5.31597	5.60812	5.44114	5.49091	5.54071	5.26523	5.95445	5.28573
ARC	4.21617	2.65857	2.34702	2.02077	2.29045	1.95788	1.07504	1.96056	2.53131	1.73615	1.56971	1.15198	4.4497	2.57313	6.56826	5.88892	5.95948	5.99695	6.12139	6.36575	6.32174	6.07465	5.94416	6.3002	6.38295	6.07538	0.139764	0.134567	0.135641	0.133683	0.137795	0.136618	0.130235	0.132607	0.130235	0.173755	0.138676	0.140616	0.137795	0.130235	0.133683	0.140616	0.154631	0.15731	0.137795	0.162322	0.128661	0.132607	0.136618
ARCN1	7.89668	8.08914	7.97541	8.48337	8.09717	8.14268	8.40622	8.24654	8.07394	8.49136	8.11851	8.08684	8.29974	8.12884	8.37241	7.93099	8.22487	8.06677	8.37164	8.30372	7.8401	8.32184	8.68576	8.19614	7.98891	8.16262	8.29599	8.06325	8.46088	7.90098	7.87583	8.20353	8.14174	8.12798	8.16346	8.26053	7.98967	7.80271	8.52298	8.0876	8.24949	8.16593	8.17139	8.34489	8.06756	8.27251	8.39393	8.14629	8.23723
AREG	4.2835	3.87473	2.66593	3.87574	3.09431	3.69096	1.8181	2.76472	3.50067	2.33269	3.45744	4.9665	3.12938	2.74732	1.88527	3.75751	3.67036	3.95781	4.74609	1.6166	2.74732	3.5226	4.81241	3.37089	2.18934	5.33071	3.69157	1.94727	2.94601	4.47067	3.84052	2.41636	2.42728	3.59021	3.78977	3.10347	2.92619	4.04027	1.87908	2.54871	3.48591	4.47368	2.92833	3.5582	3.96294	4.71978	2.17859	4.1354	-0.35903
ARF1	3.73112	1.57386	1.61772	1.66008	1.44729	1.29216	2.1905	1.807	3.58877	1.91535	3.38	1.23524	2.30782	1.66863	2.77538	2.35074	2.22197	2.36534	1.84039	3.15436	2.02193	2.73125	1.01203	3.49587	1.6879	1.8612	2.38283	2.38283	2.40807	2.44054	2.42303	2.41902	2.38036	2.40115	2.40234	2.56581	2.42303	2.37912	2.39566	2.40234	2.43091	2.34567	2.42581	2.46435	2.39716	2.46836	2.33751	2.3617	2.31026
ARF3	7.13421	6.94809	7.08519	6.95796	7.02021	6.83821	7.01329	7.73776	6.94533	7.37989	6.85307	6.9986	7.70481	7.34575	7.91128	6.67396	7.96052	7.07691	7.11332	7.20944	7.07179	7.09598	6.76922	7.11916	7.09457	6.87114	7.37503	7.23406	7.40499	7.26792	7.94217	7.21635	7.57387	7.40805	7.17891	7.40211	7.54732	7.1381	7.76612	8.07577	7.37503	7.13615	7.48513	7.58202	7.33746	7.48571	6.96879	7.19496	7.4182
ARF4	9.47525	9.4476	9.22672	9.77292	9.1645	9.08923	8.78542	9.54229	9.12054	9.43155	8.90134	9.08237	8.92212	9.30143	9.02827	9.44989	9.80026	9.31285	9.02827	9.45265	8.67359	8.93956	9.49895	8.79966	9.08237	9.0965	9.1584	9.42667	9.54229	9.54803	9.08576	9.34121	9.39241	9.21671	9.26205	9.26404	9.25974	9.2185	9.58846	9.70652	9.12572	9.04815	8.7795	8.74423	9.1429	9.01258	9.091	9.11278	9.35981
ARF5	5.62844	6.53436	6.03024	6.74457	5.99661	6.8729	6.01855	6.66924	6.27187	6.5174	5.80694	6.68078	6.53389	6.46055	7.0955	5.97735	6.33159	5.97276	6.09258	6.63229	6.3807	6.03823	5.55185	6.86836	5.67556	6.09871	6.02489	6.9723	6.35933	6.47328	6.27463	6.52365	6.28909	5.96498	6.92528	2.72271	7.13104	6.50867	6.25112	6.10765	6.70696	6.3308	6.08348	6.44841	6.69242	6.63229	6.20731	7.06307	6.94809
ARF6	7.58348	6.92278	6.51235	6.80146	6.67518	6.83696	7.06848	6.86109	7.08434	6.80622	6.87055	6.49644	6.82655	6.75574	6.58329	7.07128	7.75349	7.00497	7.02614	6.90522	6.73039	6.46711	6.73827	6.81578	7.20696	7.19266	7.36031	6.86606	7.13472	6.86064	7.19596	7.14313	7.27007	7.02366	6.89307	7.13421	6.94045	7.29442	7.18075	7.23016	6.78616	6.92996	6.18853	6.35048	6.27221	6.33493	6.75275	6.5335	6.80587
ARFGAP1	4.69026	5.41788	4.69234	5.3488	4.73194	5.42264	4.72411	5.14043	5.23459	4.68472	4.99466	5.04621	5.24817	5.41552	5.99516	4.56712	4.48968	4.79364	5.02466	5.45821	5.72526	4.98546	4.91646	5.43787	4.84214	4.83848	4.58527	5.06658	4.9418	4.83253	4.86235	5.24287	4.92222	4.58277	4.96981	4.51745	4.29227	4.29865	4.5088	4.17445	5.652	5.17387	5.41442	5.1755	5.13356	5.05659	5.47098	5.42008	5.85007
ARFGAP2	6.47546	6.68982	6.7484	6.36341	6.56158	6.29211	6.37831	6.47821	6.63304	6.69965	6.74323	7.02223	6.87163	6.43289	7.01665	6.58595	5.92683	6.40192	6.53897	6.07315	6.17584	6.77315	5.91039	6.4053	6.33049	6.39076	6.40919	6.56739	6.77315	6.90339	6.23197	6.86526	6.34799	6.43634	7.09194	6.50054	6.46404	6.27463	6.19291	6.15303	7.16639	6.17261	6.73907	6.74457	7.09647	6.91522	6.71662	6.9879	6.94533
ARFGAP3	7.20536	7.26023	7.00945	7.27835	7.14117	6.68172	7.10178	7.10224	7.24327	6.92278	7.01714	6.8208	6.70341	6.55818	7.04648	6.94086	7.06805	7.07825	7.38314	7.24327	6.98115	7.15093	7.22348	6.9348	6.92996	7.18389	7.56157	7.32555	7.2512	7.20036	7.30705	7.36417	7.24265	7.06405	7.34957	7.25625	7.52302	7.41646	7.52302	7.42979	6.9999	6.86934	5.79967	7.1844	7.07995	7.09746	7.22501	7.37883	7.23306
ARFGEF1	6.73323	6.59837	6.9783	6.60719	6.76343	6.54736	6.86198	6.37287	6.67002	6.46124	6.53699	6.37869	7.00356	6.78181	6.74457	6.91856	6.89258	6.47045	6.08467	6.76208	6.9165	6.94991	6.89531	6.58558	6.82927	6.87688	6.79196	6.64493	7.13057	6.91736	6.66148	6.9884	7.00999	6.75991	6.94768	6.69118	6.61572	6.54104	7.06759	7.16868	6.35854	6.71457	5.97922	6.16444	6.16714	6.20949	6.54903	6.51024	6.50709
ARFGEF2	6.62509	6.78831	6.94809	6.80414	6.84873	6.81988	7.20897	6.78573	6.82733	6.87516	7.09351	6.75071	6.78664	6.85758	6.26739	6.83608	6.208	6.84339	6.74539	6.53199	6.96729	6.85497	6.90262	6.72412	6.45542	6.47971	6.64409	7.06354	7.20144	7.06949	7.31867	6.78341	6.80951	6.84793	6.86836	6.76564	6.67227	6.25112	7.29872	6.85453	6.47045	6.82613	6.01928	6.57808	6.37171	6.42267	6.53008	6.25189	6.55013
ARFIP1	6.85178	6.91936	6.27754	7.19545	6.94309	7.43647	6.98115	7.58857	6.42629	7.26216	6.57725	7.16238	6.72023	6.67002	6.65092	6.88371	7.52677	7.01532	6.73161	7.38997	6.52243	7.14985	6.81359	6.75746	6.85843	6.12364	7.08232	7.28254	7.27566	7.46453	7.36203	7.28701	7.1594	7.05232	7.30082	6.61947	7.32935	7.25969	7.36363	7.30768	6.55167	6.39866	6.20621	6.32973	6.52926	6.42591	6.41376	6.70463	6.99941
ARFIP2	5.25035	5.76972	5.33709	5.65625	5.09713	5.33071	4.47628	5.30703	4.17846	6.01928	4.69105	5.9654	5.17598	5.82805	6.93308	4.94683	5.29889	4.04593	5.43409	5.81235	5.46162	5.52882	5.27051	5.43409	5.16468	5.58008	6.15372	5.85281	4.96902	5.5836	3.89692	5.34214	5.38362	5.7683	5.42827	1.25272	5.77332	5.65125	4.95326	4.72608	5.49018	5.68731	6.33493	6.8743	6.17842	6.07178	5.95152	6.09586	6.16557
ARFRP1	5.54437	5.42516	5.72376	5.98208	5.78769	5.73072	5.43749	5.62844	5.57584	5.81931	5.76936	5.95885	5.44567	5.92755	5.84862	5.31818	5.21279	5.69649	5.72633	6.20765	5.70413	5.97994	5.44502	5.4687	5.30832	5.20491	5.71726	5.79254	5.86833	5.69798	5.98596	6.12139	5.59895	5.41976	6.02806	5.49018	5.6552	5.53643	5.98456	5.88996	6.19392	5.53607	5.71214	5.81727	6.00762	5.55588	5.93574	5.9511	5.54509
ARG1	1.87556	1.39539	2.29719	3.15238	1.48682	1.89302	1.46345	1.67024	1.50097	1.13065	1.15026	1.12278	1.12557	2.21169	1.36885	1.50364	1.72543	1.2737	1.28667	0.690878	0.9678	1.31038	1.24324	0.197423	1.19194	2.52903	3.03503	1.04659	1.07091	4.88333	2.91293	2.59118	1.05476	3.69592	1.06183	4.71593	3.65321	2.85358	2.00523	2.48878	2.66396	1.32299	1.14293	1.21082	1.10217	1.20913	1.06183	1.89302	2.17718
ARG2	4.43614	4.1987	5.76162	5.87424	5.027	4.39995	5.59638	4.51745	5.47242	5.33355	4.93184	4.86522	5.76236	5.58176	5.10911	6.17584	5.2095	6.16174	5.72125	5.00539	3.79131	5.14291	5.10952	5.24964	5.2305	5.62703	5.928	5.19693	5.83405	5.02434	4.99374	5.12778	4.87318	5.15064	4.9986	5.60911	5.20988	5.8224	3.66343	5.16046	4.17846	5.1536	4.55318	4.49714	4.98732	4.39403	4.0799	4.2331	4.47676
ARGLU1	8.20353	6.97453	7.62571	6.85136	7.36479	7.15879	7.49648	6.91894	7.82176	7.10315	7.82325	6.76801	7.26299	6.67715	8.44223	7.01884	7.39897	7.02329	6.76962	7.44175	7.48255	7.73173	7.03289	7.44884	6.9435	7.24853	7.04608	6.7484	6.92996	6.8966	7.62749	6.63822	7.20144	7.11671	6.73633	7.30368	6.99422	7.45999	7.29534	7.24327	7.21099	7.29283	6.75441	6.67518	6.69798	6.56508	6.99422	6.61388	6.71119
ARHGAP1	8.58147	8.61025	8.49329	8.25571	7.79661	7.8586	8.22654	8.07179	8.30762	8.28099	8.29326	8.254	8.12159	8.01277	8.41034	8.34927	7.15189	8.04997	7.64832	8.34676	7.39964	8.44223	7.86866	8.4791	8.48688	7.93466	7.94523	7.79602	8.26235	7.86866	8.40209	7.65478	8.46606	7.98801	7.6355	8.03294	7.52677	7.14614	7.71862	8.20809	8.2362	8.06677	7.89866	8.60512	7.79392	7.86942	8.02231	7.77693	8.66461
ARHGAP10	7.39158	7.03763	7.38314	7.0546	7.61481	7.45999	7.4251	6.75858	7.60003	7.38831	7.40913	7.37767	7.27061	6.94488	7.46281	6.9589	6.5607	7.21995	7.22348	6.601	7.3745	7.57943	7.40805	7.53743	6.88467	7.02716	6.8829	6.63156	6.94533	6.37287	6.39046	6.2606	6.47734	6.68041	7.36031	7.25427	6.97411	6.61947	6.35704	6.25583	7.08926	7.23857	7.14117	6.7608	7.62009	7.13317	7.39503	7.35235	7.12968
ARHGAP11A	2.39213	2.17859	0.590154	1.71407	2.89638	1.07775	1.45209	-0.0780842	-0.107016	2.97298	2.27282	1.66397	0.504016	3.03337	1.37285	0.941631	1.55916	0.105559	0.231117	0.432011	0.0688409	0.681525	2.55533	0.705151	0.155715	5.37383	0.749709	0.727748	0.750534	3.84253	0.801703	2.27024	0.745454	0.77932	1.68673	0.95795	1.86033	2.65742	0.783136	2.59212	3.48752	0.775374	3.96909	0.882779	0.761763	2.61971	1.91646	0.716503	0.744605
ARHGAP12	6.92315	6.60628	6.04951	6.61947	6.91154	6.13255	6.80587	6.78616	6.55058	6.50954	6.36728	6.44174	7.14848	6.59257	6.65645	7.06506	6.56591	6.45051	6.1045	6.38494	6.43706	6.57454	6.87724	7.00086	6.29648	6.396	6.93046	6.8899	6.90083	6.77888	6.40769	6.57887	6.4762	6.76962	6.67314	6.30215	6.80057	6.79841	6.2301	6.59215	6.21121	6.65179	6.01761	6.17335	5.92831	5.86913	6.28698	6.32659	6.63507
ARHGAP17	6.68352	6.80239	7.01532	7.11967	6.44546	7.06949	6.90895	6.87055	6.80193	6.22568	7.09647	7.35751	6.96161	7.43263	7.23908	6.77843	5.68874	7.24167	6.23964	7.04976	6.68816	7.36624	6.47283	6.31137	5.75795	7.34363	7.28098	6.75615	7.16386	6.03538	7.7364	5.47806	6.83535	6.48922	6.02379	6.43084	6.24933	5.4594	7.0405	7.27366	6.32023	7.14614	6.20913	5.5828	5.25669	6.2591	6.57249	4.95159	6.56871
ARHGAP18	7.04194	6.03672	5.28132	5.92722	5.86164	5.43859	6.20949	6.43984	5.60849	5.57377	6.20335	6.03024	5.47598	5.30348	6.23119	6.04066	7.33428	5.45858	5.70928	5.34989	5.53643	5.75858	6.37129	5.62767	6.26856	5.85711	6.10869	5.24287	6.24601	5.68804	6.39447	5.58145	6.65139	5.8601	4.99709	5.59638	5.79927	6.50557	6.23543	6.54584	5.6032	5.16808	5.64565	5.82944	5.62535	5.32436	5.34251	5.52226	5.50153
ARHGAP20	1.3742	1.26981	1.79107	0.193624	2.44781	1.31466	3.56597	2.85596	1.25113	1.66342	2.5325	3.61129	2.73724	2.90461	1.90443	2.17718	2.39716	2.92619	1.06541	2.87574	1.94727	1.88346	2.04976	1.60562	1.32456	4.40664	3.79131	3.91659	0.872597	0.890126	2.03117	0.936693	1.18352	1.99514	3.0637	1.09174	3.05417	3.28685	2.5426	0.891707	0.880586	3.49154	2.47029	4.09475	0.897003	3.99051	4.29442	3.44706	1.04479
ARHGAP21	7.33099	7.16826	7.23966	6.69671	7.00631	6.77135	6.71985	6.67085	7.21536	7.03331	6.99469	6.52365	7.05117	6.68265	7.63945	6.60274	6.72198	6.72536	6.06884	7.17471	7.27835	7.06901	6.4997	6.99326	6.58082	6.57997	6.78756	6.66192	6.79841	6.87724	6.77535	6.87473	7.05369	7.05978	6.7001	7.16776	6.47162	6.89748	6.86747	6.85843	6.82312	6.64962	6.55859	6.67878	6.62509	6.76433	6.05963	6.51235	6.5628
ARHGAP22	4.4195	2.63105	3.84001	3.12512	2.83202	1.4172	2.94677	3.48011	3.46977	1.60206	2.21415	3.8689	3.59447	2.10478	3.66745	1.84191	3.58662	2.42977	2.69511	3.23144	1.65304	3.87816	2.53726	3.26069	3.18751	2.53588	2.5607	2.83202	3.37942	0.964392	0.999856	1.00375	3.27798	3.81202	3.36135	3.07124	2.9858	1.57101	3.95915	0.959876	3.86526	3.51508	3.64993	1.08305	3.61598	1.07314	3.73001	4.55896	4.19288
ARHGAP23	4.87233	4.89908	5.49971	5.5145	5.83366	5.66602	5.66175	5.311	6.26891	6.00762	5.95844	5.88309	5.63412	5.67952	6.02839	5.7489	5.19193	5.83085	5.48764	6.36965	5.37945	6.16788	5.29474	5.9335	5.65556	5.25631	5.48578	5.63244	5.75758	4.92092	6.07315	5.62004	5.72485	6.01993	5.98101	5.68492	5.49703	5.58176	6.04141	6.2122	5.74584	5.78197	6.24894	6.27221	5.52689	6.35892	6.44285	6.33793	5.34512
ARHGAP24	5.98633	6.03197	6.03287	6.31434	4.98691	5.56349	5.73388	6.09062	6.05637	6.27612	5.99265	5.76424	5.60474	5.88382	6.34878	6.41837	5.1716	5.45013	5.36909	5.13088	5.04816	6.23197	5.4068	6.50912	5.50041	5.44401	5.81622	5.87622	6.03672	5.36145	5.76132	5.47062	5.79287	6.40657	5.72778	5.85944	5.81235	5.24707	5.87092	6.57969	5.88996	5.76936	5.26746	5.94644	5.88996	6.06851	5.09748	4.82974	5.3913
ARHGAP25	4.3657	4.83848	3.61076	5.00377	3.63812	3.34949	4.66454	5.19193	3.93109	4.72016	4.47804	3.93685	3.3964	4.62232	3.88058	4.39742	6.59069	4.84861	4.20422	4.42841	3.91326	3.95169	4.76635	4.45349	3.90369	4.91646	4.27265	3.88681	4.27656	3.97752	4.83891	2.90323	4.78668	4.88648	4.2835	4.43409	3.52049	4.44925	4.67272	4.06394	4.54515	4.9414	5.60247	4.78131	4.82331	4.42626	4.87318	5.24817	4.72359
ARHGAP26	3.99994	4.42491	5.33246	4.49258	5.04694	5.14757	5.29926	3.93685	5.22893	5.39232	5.68124	5.29558	5.11019	5.45494	5.81378	4.60669	4.46675	4.92809	4.43483	4.61432	6.24671	5.98137	4.20837	5.52727	3.87872	4.80302	4.82045	4.8948	5.37749	4.55162	5.35621	2.98655	5.23249	3.64824	5.12123	2.24377	4.71425	1.84191	5.28253	4.68724	4.29642	5.2166	1.88691	2.0425	3.35154	4.89691	5.47806	5.17881	5.0366
ARHGAP27	1.14232	3.51767	3.51767	1.11146	2.72359	2.414	1.62593	2.81426	3.92634	2.31475	3.12867	1.05068	2.78529	3.815	2.81426	2.07622	2.81426	2.8098	2.90178	3.39073	3.10725	2.92151	3.0637	2.89776	3.02348	2.95901	2.32905	3.05081	1.44127	1.47471	1.49715	1.52463	2.74916	1.46661	1.42799	1.67024	1.42799	1.44333	1.4552	1.45834	1.44475	3.81994	4.73234	3.61227	1.45358	4.67807	3.98964	2.10363	3.28685
ARHGAP28	1.2333	0.813113	1.54813	2.01285	1.70262	0.270561	2.95613	1.37076	1.08782	2.21689	1.64493	1.57835	1.20171	0.186417	1.30169	0.555918	1.11388	0.758325	-0.150316	1.07885	1.09618	2.38967	3.47267	1.35236	3.06498	1.61079	3.20694	2.60171	1.16525	1.20009	1.22707	2.2987	1.85362	1.19504	2.92392	1.3811	3.88823	1.174	1.18862	1.19143	1.18558	1.18616	1.22504	1.30824	2.5415	1.29884	1.15639	1.14735	3.19206
ARHGAP29	7.01196	6.90935	6.84254	6.4649	6.84339	6.57535	6.62864	6.5632	7.087	6.84084	6.93997	6.41196	6.96205	6.82841	7.16049	6.70097	6.68736	6.91154	6.02689	6.89442	7.50854	6.93742	7.44348	6.67518	7.06457	6.91936	6.76962	6.76124	7.13157	7.09457	7.05068	6.95611	7.14517	7.1504	6.86239	6.96061	6.98883	7.3463	7.39557	7.11431	6.80325	6.41875	6.77413	6.54967	6.8236	6.96777	6.08818	6.6822	6.70375
ARHGAP30	4.30226	3.77385	4.07601	3.91993	3.57058	2.32905	4.60539	4.66802	3.35507	4.23711	3.93259	3.94478	3.28862	4.11544	3.29778	3.61653	6.28052	3.79234	3.85027	3.86526	3.84305	4.08319	3.66543	3.47833	3.89692	4.0961	4.12501	3.67485	3.51661	3.30247	2.52457	4.21446	4.26823	3.32521	3.68722	4.79109	4.30497	3.23531	4.53567	3.93208	3.92074	4.29136	4.4155	3.77897	4.6843	3.37538	4.07519	4.0883	4.14278
ARHGAP31	5.37905	5.8365	6.06292	5.993	5.87166	5.97236	5.82527	6.07913	5.75489	5.99866	6.29794	6.40998	5.75327	6.21183	5.70381	5.6044	6.42233	6.22273	6.04655	5.6032	6.12815	6.28536	5.92052	5.7152	6.00762	6.33716	6.08747	6.4289	6.13291	6.06657	6.05361	6.3042	6.40804	6.08396	6.24894	6.2297	5.91768	5.83539	6.50281	6.25149	6.19214	6.02283	6.00646	5.77694	6.09062	6.14386	6.36692	5.97558	6.08348
ARHGAP32	3.36434	1.93766	3.32901	3.22503	4.37113	1.62069	3.70148	1.87313	3.75697	2.51248	3.02348	3.69356	3.10474	3.1279	3.84691	3.60613	3.39368	3.4564	2.72621	3.21134	3.57167	4.21446	3.58712	3.10077	3.16512	3.79286	2.57944	2.83873	3.33554	2.29431	3.43676	2.69511	3.62265	3.2019	3.7829	3.39073	2.80889	2.87352	3.62985	3.90282	3.58257	3.48646	3.66793	2.97993	3.35853	3.33908	3.54072	3.87223	3.56033
ARHGAP33	3.4585	2.66493	2.16178	1.9202	1.53559	2.81945	1.41254	1.95687	3.15946	2.697	2.71177	2.85895	4.05415	2.97447	3.86185	1.85029	0.956027	1.42211	1.38004	3.21813	2.60975	2.60752	1.96141	2.34939	2.82614	1.61422	1.75646	2.51153	1.77743	1.81146	4.52525	1.8645	1.7419	2.62801	1.76435	2.12431	1.76632	2.19825	3.31291	1.78243	1.77743	4.20837	3.44365	1.94624	4.76008	3.85091	1.75861	1.75049	1.73429
ARHGAP35	6.54104	6.45372	6.67549	6.5632	6.41629	6.52479	6.83866	6.99941	6.73409	6.79365	6.79322	6.95477	7.15688	7.07267	6.69636	7.24531	6.48338	6.81445	6.93997	7.11087	6.56739	6.35363	6.45577	6.86699	6.39912	6.12967	6.82312	6.49601	6.87385	6.25223	6.73115	6.56243	7.06702	7.01803	6.74323	7.13764	6.46326	6.35522	6.71946	6.90709	6.38803	6.85453	6.58996	6.79841	6.61522	6.77047	6.12815	6.09331	6.44133
ARHGAP36	1.7081	0.912096	1.70085	1.75383	0.0959085	0.979523	0.805854	0.980098	1.00949	0.134567	0.912724	1.1897	0.230461	1.39243	0.805854	0.665298	1.046	-0.633246	0.806533	1.03624	0.392197	0.339036	0.29846	0.948024	0.626502	0.0385103	1.15142	1.13065	4.742	1.18818	1.21495	1.23846	1.13477	1.18558	1.14402	1.36885	1.15365	1.16415	1.17891	1.18152	1.17347	1.17294	1.21281	1.29505	1.18261	1.28822	1.14672	1.13805	1.14777
ARHGAP39	4.87592	4.55535	4.88218	3.89385	4.23528	4.56507	4.34181	4.42527	4.66972	4.30366	4.36319	3.76004	3.81746	3.92536	3.84305	4.20377	4.00919	4.28957	3.91286	4.7855	4.2118	4.20705	4.24032	4.03071	4.36007	4.10608	5.13131	4.13887	3.85559	4.7377	2.82867	4.17396	3.53263	5.4444	4.28536	4.2722	4.36092	4.64575	2.86834	4.61024	4.69759	3.74899	4.69026	5.28299	3.24786	4.42036	3.41222	3.47209	3.51079
ARHGAP4	1.16353	1.84439	3.58464	3.56033	1.6645	1.43559	3.26572	2.78253	0.129331	0.205022	1.08851	3.01426	3.29966	1.08903	1.39133	0.849549	4.10837	0.981365	2.02077	3.17532	1.16353	0.998173	1.09115	1.67444	1.37184	1.07554	1.74735	1.75646	1.76929	1.80066	1.81646	1.85509	1.73615	1.79521	1.75646	2.11126	1.75861	1.75861	1.77209	1.77478	4.1027	1.75861	1.80265	3.84205	1.7754	1.93489	1.75049	1.74313	1.72658
ARHGAP42	4.66408	4.33681	4.67565	4.84988	4.06676	3.81701	4.56152	4.63717	4.01348	4.30144	4.11241	1.65531	4.12413	5.32198	3.39139	4.68773	3.94478	4.12372	3.22374	4.09865	4.73652	4.7373	4.3219	3.11076	3.58823	3.94347	3.97337	4.73811	5.45013	4.40305	4.31745	4.46582	4.05277	3.81104	3.69686	3.454	4.71675	3.10859	4.64995	4.71885	3.18372	4.25377	2.58157	3.7605	3.72125	2.93642	3.27467	3.18372	3.90136
ARHGAP44	5.09517	5.23852	5.00342	4.97619	5.16697	5.4926	4.58742	5.06133	5.42079	4.63633	5.29069	5.37905	4.34931	4.83168	4.83926	5.35066	4.84139	4.99748	5.22588	4.82252	4.5109	4.72732	5.13281	5.03532	4.83848	5.09313	4.87444	5.1153	5.15624	5.23422	5.15144	4.81282	4.91731	5.17228	5.2641	5.97449	4.94099	4.65164	4.72359	5.22313	4.75123	4.66929	4.46042	4.59475	4.96477	5.4415	4.78628	4.92384	4.67439
ARHGAP5	6.27898	6.93265	6.448	6.94533	6.71031	7.08657	6.93173	6.93953	6.76606	7.237	6.72323	7.4708	6.67227	7.04241	6.38371	7.25723	6.70414	6.93437	6.75902	6.67674	6.56591	6.71946	7.24899	6.92801	6.9844	7.05117	7.0608	7.41072	7.22654	7.17844	7.73577	6.96824	7.02168	6.99518	7.37615	6.66636	7.20301	6.75071	7.35751	7.68166	6.86699	6.91981	6.12109	6.42233	6.59946	6.9129	6.77656	6.95201	6.90007
ARHGAP6	5.41485	5.41442	4.45436	4.94302	5.27112	5.05049	4.31574	5.16468	4.96256	5.288	4.52153	4.59257	5.18884	5.1559	3.89188	5.21946	5.42934	4.41591	4.77055	5.51257	4.91807	5.25136	4.98127	4.83969	4.64338	5.56908	4.59309	4.48376	5.00941	5.13612	4.27573	5.38836	4.96561	5.09828	4.81924	4.8884	4.66321	4.49637	5.04544	5.4777	5.18223	4.25964	3.92304	4.95495	4.45735	4.76368	4.34279	3.56438	4.99374
ARHGAP9	4.76452	4.65595	4.02444	4.12139	4.69396	2.25967	4.89359	5.95658	2.94837	4.5227	2.43923	3.96823	3.46165	4.48097	4.61826	4.05559	4.45386	4.68166	5.40168	4.27183	1.80917	4.00376	4.62453	4.35192	4.45221	4.76976	3.62166	3.75597	3.91326	2.38283	4.44545	4.91323	4.44112	3.42301	3.59608	6.27539	3.89085	4.79792	3.77622	3.58309	4.49637	3.76004	5.0406	5.48649	4.50839	4.91945	4.2863	3.88058	3.92074
ARHGDIA	4.87883	5.43892	4.84493	5.41485	4.24781	6.06585	4.49756	5.76096	4.35511	5.92269	4.04867	5.91377	4.81447	6.02141	5.91473	4.45865	5.42796	5.50527	5.99333	5.73676	4.9322	5.00784	4.12761	5.27884	4.67643	5.05012	5.12351	3.86741	4.99105	5.31704	3.57337	5.29443	4.27092	5.06979	5.94344	5.56279	5.4803	5.68369	5.07097	5.14446	5.29407	5.33811	5.42297	5.69077	5.59194	5.36941	5.4068	6.1179	6.38617
ARHGDIB	7.84302	7.25274	6.601	7.02465	7.56769	6.9999	7.75615	8.28309	6.63741	6.72615	7.00124	6.84045	7.46785	7.35751	6.6096	7.06992	8.69506	7.48876	6.87993	7.0576	7.19012	7.64895	7.66402	6.71946	7.41467	7.47744	7.14418	7.01532	6.61157	6.8829	6.95702	7.65282	7.63421	7.55104	7.06457	7.06759	7.41345	7.93391	7.37503	7.56461	7.72353	6.62351	7.54504	7.99064	7.48751	7.78065	7.30921	7.84797	7.82176
ARHGDIG	3.89188	2.97219	4.76168	5.12155	4.18636	4.42264	3.96294	4.42121	3.86479	4.49835	3.61325	4.72648	3.89085	5.1666	4.46132	1.75646	3.86429	4.06394	3.89938	3.56491	5.63955	2.44403	3.99008	1.38414	4.85023	5.39865	3.56222	5.6054	0.785465	3.47085	4.13976	4.51131	4.4366	5.16994	3.52986	4.22779	3.66793	5.3521	4.51621	5.1266	4.9359	3.81604	5.0919	5.04223	4.6179	3.76496	0.769385	0.750534	5.15101
ARHGEF1	6.1045	4.14839	5.41189	4.82683	5.34945	5.58688	4.47022	4.25258	5.45013	5.04816	5.31487	4.94063	5.07177	5.40499	5.68627	4.18113	5.14757	5.1666	4.99748	5.44789	6.13708	5.2106	4.22958	5.62004	5.17426	4.47368	4.17704	5.33602	4.80384	4.58489	5.18763	5.63275	4.32642	4.90296	3.79078	5.08683	5.08438	5.08333	5.09949	0.509331	5.9673	4.84139	4.65253	5.04265	5.09313	4.22736	5.16429	4.62453	5.16115
ARHGEF10	6.03707	5.41631	5.49165	4.86944	5.50979	5.31558	5.72013	5.18034	5.55378	5.0162	5.24891	4.96126	5.95029	5.1379	6.16929	5.19513	5.20017	5.24817	5.46203	5.45663	5.65925	5.92578	5.1841	5.92683	5.41153	5.6478	5.32517	4.95073	5.64641	5.52259	5.90677	5.42297	5.64343	5.77922	5.81548	5.42796	5.52402	5.25898	5.87962	5.00539	5.74665	5.62675	5.76162	5.4068	5.39023	5.37945	4.73301	5.5428	5.58078
ARHGEF10L	6.98924	6.95973	6.77223	6.72575	6.93353	6.65262	6.38414	6.58558	6.77413	6.83779	6.61702	6.28205	6.51235	6.42163	7.20536	6.48489	6.23088	6.70656	6.70613	6.81323	7.0031	6.29343	6.10565	6.71076	6.67674	6.24933	6.73827	6.83235	6.64799	6.54426	6.40028	6.53241	6.45772	6.21299	6.43634	6.52117	6.64717	6.20227	6.20036	6.36041	6.69413	6.68554	6.4305	6.37287	6.44879	6.21147	6.68078	6.54657	6.46668
ARHGEF11	5.17073	5.46916	5.7292	5.18106	5.68447	5.04732	5.48101	5.32015	5.44066	5.27846	5.5728	5.62004	5.66916	5.05243	6.30984	6.61865	6.56352	6.40657	6.42267	6.38767	6.30529	6.208	6.16404	6.39987	6.15617	6.26702	0.139764	0.134567	0.135641	0.133683	0.137795	0.136618	0.130235	0.132607	0.130235	0.173755	0.138676	0.140616	0.137795	0.130235	0.133683	0.140616	0.154631	0.15731	0.137795	0.162322	0.128661	0.132607	0.136618
ARHGEF12	6.06884	5.95559	6.18598	5.70086	5.78657	5.8107	6.15071	5.97168	6.14957	5.64845	5.89065	5.61077	6.54426	6.09838	5.94057	6.63077	5.59194	6.36371	6.14812	6.86064	5.59464	6.11927	6.73787	6.05671	5.80725	5.79892	5.9399	6.23929	6.56117	6.11609	6.45453	6.36575	6.59594	6.79277	6.64099	5.9376	6.35442	5.77264	6.0306	6.73494	5.63452	6.05264	5.25855	5.73809	5.64437	5.61013	5.84307	5.64709	6.1359
ARHGEF15	5.32015	5.44749	5.95071	4.17129	5.32958	5.1228	6.01928	5.77556	5.63526	5.55722	5.32742	5.52296	5.69172	6.10271	6.71378	5.34439	4.83168	5.24248	5.12744	5.49971	6.07617	5.8511	5.35694	5.32083	5.9383	5.33602	5.64231	5.1585	4.73885	5.49845	5.95593	6.0858	5.68124	5.48281	5.15661	5.69304	4.87476	5.29297	5.82908	6.18386	6.18772	5.5417	5.87726	5.70745	5.24361	4.7269	5.54103	5.41442	5.62875
ARHGEF16	3.57337	4.31798	5.16046	4.70352	4.46492	4.77469	4.79923	4.15388	4.58605	1.92207	4.78858	4.1646	2.78768	2.29306	4.23438	3.41901	2.70199	3.70311	4.6538	4.92384	5.15027	4.39485	3.80263	2.70102	3.92126	3.83905	0.424771	3.12006	4.5088	6.27797	3.47374	5.22467	4.71017	2.94601	4.0107	2.63382	3.71039	0.458605	3.84549	3.61378	4.86522	3.20496	6.26091	4.93707	4.37648	4.6355	4.61064	4.09299	3.51233
ARHGEF17	5.88344	6.31137	6.1157	5.97449	6.54501	6.37951	6.18245	6.01082	6.2435	6.37523	6.42374	5.44633	6.23576	6.00039	6.66148	6.22529	5.25736	6.35487	6.43204	6.05894	6.84919	5.86048	5.93319	6.17842	6.63379	5.91915	5.99065	5.20219	5.93251	4.60858	5.10322	6.54309	6.19488	5.39023	5.67766	6.27576	5.60614	5.64501	5.77264	5.96902	5.82635	5.79823	6.49601	6.62394	5.93146	5.74693	6.40919	5.47242	6.95477
ARHGEF18	6.15576	6.44978	6.5699	6.27539	6.04581	5.99901	6.24601	6.48338	6.22933	6.30633	5.99443	5.87828	6.04473	6.28909	6.36116	6.24534	6.26022	6.19291	6.79455	6.34878	6.42339	5.88695	5.99757	6.19885	7.07267	6.14019	6.1769	5.97523	5.9383	6.31051	6.14669	6.42515	6.40418	6.59174	5.65273	6.09703	6.1831	6.3405	6.29211	6.3135	6.55359	6.14128	6.70559	6.57412	6.34799	6.58329	6.38414	6.06365	6.83062
ARHGEF19	4.66725	1.69076	3.33364	2.98945	4.9322	4.81202	4.59526	3.64441	4.71258	3.86127	4.89566	2.89703	4.58567	2.98733	5.5145	3.85459	4.37695	4.36007	4.2844	4.15697	4.15741	4.20837	3.7269	3.56383	4.32563	4.46221	4.55494	4.47676	3.70851	4.65595	4.66485	2.75908	4.64824	2.83456	4.80723	3.68874	4.27613	3.68	5.08403	3.84789	4.88371	4.66761	4.73885	4.77915	4.67884	3.70311	3.7605	4.552	3.84305
ARHGEF2	5.57732	6.59946	5.14841	5.70745	5.45663	6.13477	5.8089	6.78708	5.55655	6.45926	5.21913	5.88892	6.15182	6.5036	6.36154	5.55144	5.63562	6.2613	6.37044	6.73666	5.89447	6.25112	5.73241	6.27797	6.18346	5.05088	5.93574	5.59162	5.62149	6.10271	5.52689	5.94454	5.80856	5.83366	5.88218	5.80027	6.06257	5.95264	5.97276	5.82413	5.77957	6.40103	6.0858	5.69577	6.29304	5.89372	6.35404	6.19926	6.38295
ARHGEF25	5.21465	5.77332	5.9496	4.78476	1.42167	4.23993	4.50046	5.27017	4.6735	6.14239	4.77186	5.14959	4.95539	5.31381	7.06901	4.99466	4.83734	4.87845	4.6376	4.88044	5.19984	5.06935	4.46718	4.73301	6.21806	6.47208	5.00022	5.27808	4.41259	5.31381	5.52366	5.21313	5.55556	5.44713	5.60286	-0.0437051	5.52153	5.69236	5.15027	5.36222	5.50755	5.95407	5.96286	4.64118	5.81727	4.98055	5.54437	5.80929	5.71179
ARHGEF26	5.45013	5.16273	4.31136	5.06741	4.29966	4.19737	3.95169	4.15506	4.36282	4.568	4.35902	4.62403	4.28873	4.19691	4.65674	4.4694	4.30184	4.20184	4.19781	3.92034	5.11123	4.63717	4.41342	3.98964	4.11291	4.58917	2.96992	3.618	4.46899	3.93538	4.0227	4.9422	4.76976	3.94301	4.47496	3.87272	4.16019	4.30497	4.29318	5.01506	3.31642	3.8924	3.89555	3.58309	4.63838	4.08699	4.17267	4.16102	4.51246
ARHGEF3	6.94533	6.67792	6.12694	6.61124	6.2884	6.55403	6.80917	7.19939	6.64493	6.78341	6.49187	6.49187	6.42301	6.74323	6.52321	6.8187	7.06564	6.41538	6.98625	7.06949	6.80024	5.86879	6.69965	6.50867	6.76922	6.53164	7.46341	6.81746	6.831	7.0207	6.78388	6.49311	7.07448	6.79365	6.9435	6.69494	6.68078	6.94488	6.79404	7.05232	6.32747	6.71908	6.27388	6.60502	6.5884	6.61238	6.31979	6.43634	6.3764
ARHGEF37	5.94644	5.56669	6.62089	5.64709	6.13556	5.5616	6.43533	6.04951	6.1769	5.8601	6.166	5.81868	6.58754	6.40998	5.96249	6.06292	6.08275	5.58145	6.32438	5.75327	5.92468	6.11151	5.76718	6.27898	6.43009	6.21806	6.1675	5.95372	6.02552	5.88218	6.14562	6.36227	6.47245	6.34878	5.69508	6.34372	5.67952	6.13748	6.05855	6.12292	6.22568	6.37562	6.57535	6.13633	6.26596	6.24116	6.42515	6.23235	6.02107
ARHGEF38	2.91991	0.434087	4.11057	4.14147	0.682639	4.66652	3.17388	2.01402	-0.426546	2.76983	1.52146	4.02363	2.73419	3.07737	1.55965	2.74916	1.67092	3.12712	2.01859	1.99514	1.50046	2.99919	2.59753	1.39395	1.29565	1.78166	0.757468	4.22423	2.05893	0.76776	4.99663	3.59858	3.83454	4.98472	0.731307	0.968427	2.51052	3.86796	5.07056	3.86381	3.3964	0.783136	4.78393	0.893035	4.23711	0.897003	0.741063	4.03124	3.65413
ARHGEF4	1.52918	4.33006	1.57041	1.08305	0.960564	2.68303	1.19958	1.0842	3.69253	1.00636	3.86479	1.56411	1.42799	1.61837	1.17006	1.35355	0.155715	0.524415	1.45358	1.45613	0.154631	1.53804	1.99033	1.03514	3.71977	0.929688	0.921301	0.910741	0.924566	0.94691	3.94612	2.1439	4.03349	4.03924	0.913521	1.14921	0.921301	0.943701	4.79963	3.54072	0.938563	0.94923	1.00636	1.06836	2.96992	1.05884	0.912096	2.83118	0.925199
ARHGEF40	5.39023	5.00826	5.00459	4.89609	5.07574	4.4677	4.84372	4.60669	4.99015	4.62663	4.96902	4.61432	5.11805	4.5512	5.22245	5.1127	5.09517	4.99057	4.84613	4.93371	4.96602	5.29667	5.09828	4.70453	5.00496	4.80464	4.60009	4.82765	4.92621	4.94396	4.5698	4.91481	5.06206	4.69607	4.55318	5.14804	4.86235	4.92264	4.96001	4.69316	4.84214	4.96172	4.71639	4.86324	4.76083	4.93338	5.06249	4.97402	5.58805
ARHGEF6	8.41437	8.1375	8.59102	8.33577	8.52164	7.91355	8.54676	8.16169	9.28604	8.68157	8.36115	7.83201	8.83463	8.34676	8.488	8.89166	8.22753	8.38544	8.44396	8.68576	8.60745	8.26798	9.5934	8.66724	8.30162	8.33675	8.66851	8.8842	8.63776	8.2457	9.00444	8.05841	8.45085	8.66062	8.4387	9.07833	8.4114	8.3503	8.30658	8.92685	8.01196	8.64812	8.65599	8.67359	7.96814	8.41687	8.298	7.96897	8.03781
ARHGEF7	6.38414	6.0306	6.29095	5.58957	5.93179	5.84757	5.80614	5.49971	6.12657	5.65377	6.01315	5.8037	5.49165	5.49298	6.55652	5.62575	5.2876	5.8724	5.66742	6.03962	6.00146	6.11118	5.91473	5.94818	5.80475	5.69649	5.32478	5.4194	5.73241	5.91816	6.01491	5.76936	5.91579	5.77332	5.98633	5.69473	5.43373	5.66673	6.15303	6.36006	6.04846	5.64679	5.73461	5.43996	6.13556	5.88218	6.12967	5.7267	5.71981
ARHGEF9	6.32594	7.01803	6.72239	6.85589	6.12928	6.5032	6.55908	6.43407	6.74368	7.33428	6.63507	7.26299	6.57887	6.87561	6.12001	7.16432	5.81482	6.87688	6.64257	6.45807	6.69714	6.31824	6.87645	6.5632	7.14754	6.6989	6.74457	6.84969	6.85589	6.45691	6.81087	6.79889	6.66884	6.35933	6.95161	6.7749	6.65986	6.1157	6.71537	6.87015	6.88467	6.9458	6.86449	7.08519	6.78966	7.06702	6.99384	6.80544	6.70341
ARID1A	5.78724	6.32704	5.5777	5.60215	5.98925	6.25552	6.03093	6.37044	6.48605	6.56117	5.82773	6.21842	6.04581	6.28698	6.54144	6.33943	5.42554	6.58448	6.59757	6.42267	5.68906	5.78936	5.62288	5.53141	6.25366	6.12775	5.88115	5.81001	6.04253	6.41712	6.62509	6.69759	6.20335	5.99789	6.14889	6.69759	5.24558	4.97541	5.6625	6.18529	6.19561	6.04221	6.38658	6.95072	5.8228	6.75441	5.95524	5.98101	6.36341
ARID1B	5.97353	5.45792	5.59464	4.88692	5.75558	5.53826	5.96021	5.59601	5.66742	5.64813	6.08167	6.00546	5.75102	5.68192	6.18114	5.6018	5.81868	5.4444	5.54437	5.51598	5.86508	6.19425	5.1559	6.31243	5.70413	5.33319	5.93906	5.82835	5.91158	5.7361	5.5903	5.30006	5.51188	5.80059	5.81962	5.47806	5.68664	5.74858	5.74085	5.64709	5.39164	5.7399	5.17881	4.71258	5.81996	4.71425	5.47598	5.55342	5.08556
ARID2	5.65958	5.09228	5.57058	5.25932	5.28844	5.22746	5.31748	5.36294	5.769	5.07688	5.79254	5.49338	5.0431	5.02013	5.55623	5.81768	5.33847	5.36872	5.29069	5.39164	5.02189	5.64565	5.65377	4.99663	5.20176	5.49845	5.3021	5.49773	5.42827	5.08333	5.85007	5.47841	5.50941	5.38987	5.41826	5.47701	5.70784	5.29222	5.41902	5.72852	5.24114	5.567	5.40168	5.30805	5.45353	5.04016	5.25556	5.32083	5.49602
ARID3A	4.69759	4.78214	4.75608	4.39572	4.57518	5.16115	4.74739	4.35283	4.58363	4.46978	4.72608	4.73234	5.32083	3.90996	5.01143	4.26782	4.64408	5.0788	5.04544	4.81241	4.97438	4.70149	4.70307	5.05088	4.9747	3.95963	4.83734	4.9665	5.24817	4.57233	4.12092	4.40347	4.18291	4.89691	4.88809	4.31694	4.45173	4.99938	4.62072	4.14982	4.30962	4.95743	4.72411	4.14603	4.0434	4.2779	4.6012	4.71593	5.0593
ARID3B	2.70945	1.18916	3.28862	0.603373	1.44632	3.0781	1.86281	2.91121	1.43609	1.02046	1.61185	1.33199	0.784648	0.940409	1.15587	1.03864	0.71469	0.644726	0.923292	0.960564	2.53588	1.993	0.026018	1.24713	0.466612	1.40857	1.6691	1.66965	1.68734	1.72158	1.73354	1.77282	1.66288	1.71344	1.67615	1.98386	1.67263	1.68307	1.69971	1.70145	1.69563	1.68307	1.72967	1.83518	1.69735	1.8368	1.67393	1.66965	1.65715
ARID4A	6.24318	5.52953	5.70381	6.21876	5.93107	5.55588	5.78197	5.40459	6.14562	6.03614	5.7659	5.63994	5.73642	5.44977	6.05297	5.50338	5.70017	5.1904	5.20876	5.46309	5.23894	6.19064	6.16675	6.1175	5.25481	5.76522	5.69871	5.91377	6.04806	5.96286	6.07696	5.43787	5.87863	5.83304	5.96092	5.48578	5.73096	5.34326	6.00485	6.23889	5.25704	5.73576	4.87516	5.19857	5.23315	5.43522	4.71935	5.08477	5.73096
ARID4B	6.81746	6.37987	6.45295	6.4389	6.67188	6.35487	6.69159	6.396	6.80097	6.57412	6.73633	6.53008	6.65688	6.36847	6.79751	6.6783	6.58484	6.70299	6.54025	5.88447	6.46586	6.85402	6.70414	6.46158	6.30529	6.38579	6.66407	6.5691	6.71422	6.70049	6.55818	6.26891	6.50206	6.51468	6.5244	6.76834	6.3764	6.51851	6.74757	6.44634	6.17407	6.42972	5.98061	6.17114	6.11215	6.44512	6.09838	6.09447	6.02839
ARID5A	5.84827	5.61474	5.40049	6.08238	3.15946	4.66613	4.54862	6.10377	2.79215	5.64501	4.81958	1.49509	5.6301	1.71235	8.47698	4.80185	3.74899	5.288	5.30479	5.57584	3.54848	4.43245	5.35256	4.28713	5.3087	4.11821	5.72446	5.70825	6.16174	4.51173	4.50386	4.42036	4.59383	5.28844	5.89132	4.87883	5.78449	5.06658	0.682639	5.6904	4.14147	6.66447	5.51732	4.82636	4.89987	5.39573	5.61327	5.36588	6.5699
ARID5B	6.62133	6.13906	6.02074	5.93419	6.11831	6.2122	6.27305	6.46915	6.09808	6.23576	6.19027	6.11297	6.35442	6.37951	6.55095	5.94528	6.67002	7.01477	6.57579	6.14086	5.43593	7.04327	6.03197	6.08396	6.09407	5.91377	5.54998	6.56352	7.1823	6.45577	6.98538	6.40064	6.13708	6.422	6.71335	6.22456	6.09208	6.83275	6.61238	7.12065	6.56466	6.40339	6.35487	5.48953	6.40028	6.52715	5.57908	5.70381	6.51701
ARIH1	6.88419	6.90381	6.98585	7.08784	6.98484	7.1277	7.36905	7.1823	7.08232	7.16335	7.00548	7.14896	7.03555	7.12468	7.22971	6.97597	6.75658	6.98302	7.03763	6.79751	7.07448	6.85348	7.36741	6.90763	7.18075	7.29765	6.77751	7.11276	7.27115	6.9427	7.03151	6.95161	6.87861	6.90976	7.15375	7.06992	6.87724	6.70951	7.0608	7.06307	6.82441	7.00497	7.1802	6.95929	6.73409	7.0405	6.91736	6.7608	6.91382
ARIH2	7.37941	7.76819	7.46963	7.5042	7.71318	7.71318	7.5461	7.37098	7.09943	7.4251	7.31589	7.44115	7.6053	7.61744	6.93914	7.81023	7.02168	7.59654	7.7973	7.66737	7.87029	7.54046	7.4893	7.38763	7.74515	7.61744	7.40862	7.60274	7.41975	7.96371	7.37883	7.30872	7.15093	7.59804	7.66402	7.55922	7.38165	7.32605	7.55398	7.10781	7.34415	7.43381	7.37941	7.80401	7.67251	7.33919	8.19029	7.60145	7.46621
ARL1	8.17995	8.40844	8.10607	8.42012	8.30162	8.2613	8.02407	8.12633	8.34186	8.37241	8.32596	8.13077	8.02993	8.15234	8.18356	8.11024	7.89294	8.21246	8.27172	8.16838	8.33675	8.05669	8.53129	8.14087	8.27428	8.3503	8.39593	8.35101	8.34676	8.29425	8.42529	8.29519	8.20353	8.24744	8.26326	8.24073	8.61677	8.30658	8.42754	8.30762	7.89668	8.08454	7.98891	8.19441	8.05933	8.05246	8.22023	8.17326	7.89072
ARL10	4.70064	4.99466	4.25332	4.40907	4.59875	4.22014	4.56842	3.95828	4.87914	4.37113	4.66096	4.26951	4.77683	4.15222	5.23284	4.63471	4.55076	4.21488	4.6769	4.40611	4.37603	4.66276	4.22871	4.48608	5.05659	4.37163	4.80143	4.9058	4.71425	4.79709	4.82045	4.09052	4.49835	4.34321	4.70149	4.3657	4.49042	4.03217	4.32973	4.60159	3.97378	4.62197	3.98594	4.55076	4.08965	4.17079	4.28957	4.2118	4.14509
ARL11	0.231117	2.21415	2.65984	1.75797	1.56693	-0.107016	1.43512	0.676375	3.01217	1.95962	3.50013	-0.124329	3.16841	-0.157248	0.254804	0.604746	2.93565	1.35091	1.17781	1.48791	1.26196	1.85949	0.749709	0.7462	2.22599	1.10272	2.16997	2.09249	1.10791	1.14059	1.16415	3.90673	2.06574	2.6687	3.32345	1.31953	1.10738	1.11601	1.12896	2.21922	1.12666	1.12557	1.17183	3.05592	2.06809	1.24108	3.65056	2.59306	2.84531
ARL13B	5.10397	4.80772	3.5376	5.21028	4.56325	3.86479	4.15788	4.96981	4.62835	4.43192	4.85684	4.76209	5.54071	3.82918	4.98199	4.50421	4.56152	4.27613	4.62154	4.60333	5.39093	5.61759	5.11965	3.94119	5.08175	4.55362	5.23135	5.25972	5.39463	4.61024	5.23605	4.85147	4.57682	3.95828	5.09867	4.2849	5.29185	4.40264	4.82765	5.37644	4.00328	5.10557	4.49426	4.55237	4.64739	5.09828	3.48381	3.46009	5.49736
ARL14	0.662158	0.834431	0.111714	0.907829	1.8461	0.464591	0.0892679	0.765346	0.108966	1.63042	0.182165	0.322491	0.927268	2.53936	1.1746	1.16858	1.03624	1.79177	0.742936	0.156444	0.600663	0.57298	1.26403	0.622775	0.254804	0.100772	0.829078	0.821214	0.831548	0.845759	2.62801	0.897003	0.829923	0.868692	0.813113	1.046	0.825851	0.848866	0.868692	2.34092	0.84206	0.863176	0.914783	4.07519	0.856502	0.970766	0.820283	0.804126	0.831548
ARL15	7.59021	7.42856	7.09746	6.63934	7.37883	7.19846	7.34141	7.50981	7.61019	7.37388	7.50914	7.15741	7.27215	7.00589	7.32503	6.92356	7.76212	6.73827	6.09838	7.10224	7.19454	7.33154	7.42691	6.71704	7.15428	6.82888	7.27674	7.27729	7.73244	7.30656	7.71456	6.8391	7.54168	7.55221	7.49914	7.22298	7.22348	6.85219	7.918	7.7029	7.36479	7.45695	7.11671	6.48838	6.75315	7.13764	7.02907	6.77083	7.05722
ARL17B	5.73096	5.06417	5.39501	4.8719	5.23315	4.85933	4.92935	4.26823	4.77225	4.70672	5.07139	4.64338	5.86913	5.53216	5.80167	4.88333	5.0158	4.95455	4.82124	5.96092	5.44633	5.63597	5.2796	5.04694	4.9414	4.86863	5.25704	4.62912	5.2293	5.10872	5.29371	5.23765	4.98812	5.15772	5.03402	4.78628	5.21535	4.35902	5.28844	5.11455	5.21244	5.24857	4.01263	3.2839	5.19578	4.33723	4.80338	4.52312	4.84048
ARL2BP	6.20874	6.54061	6.17617	6.24116	6.62509	6.76564	6.52117	6.57773	6.18702	6.53897	6.07913	6.37287	7.29323	7.09297	5.84968	6.69759	6.43361	7.00631	6.97966	6.37478	6.2435	6.50912	7.1935	6.22673	6.85497	6.56739	6.72929	6.69928	6.69798	6.67122	6.11335	7.0704	6.25583	6.29574	6.62394	6.26212	6.90305	6.91109	6.84421	6.58677	6.76877	6.971	7.45751	7.26792	6.76723	6.86888	6.89131	6.82613	7.16587
ARL3	7.48027	7.4112	7.48981	7.55922	7.38831	7.51532	7.3354	7.43941	7.62504	7.46172	7.76212	7.55977	7.44646	7.04701	7.76752	7.43381	7.51711	7.56769	7.73445	7.3549	7.63818	7.61931	7.48381	7.58555	7.1629	7.48751	7.65802	7.75891	7.39964	7.33428	7.63237	7.64126	7.36689	7.27366	7.54554	7.17115	7.70659	7.75615	7.68875	7.69723	7.78754	7.69063	7.59218	7.10504	8.08074	7.22138	7.73915	7.78617	7.59804
ARL4A	5.49377	5.09153	5.58957	5.08368	4.8719	4.93837	5.59464	6.3619	5.41228	4.8539	4.71017	2.9669	5.87552	5.49018	5.50227	6.54061	5.36621	5.8647	5.44536	5.09671	5.78724	4.729	5.7053	5.53573	5.81235	5.06093	6.96931	6.41712	6.169	6.19291	6.1045	6.05519	6.31474	5.87828	6.25074	5.8107	6.73863	6.0364	6.04806	6.72366	6.10377	6.49222	6.27187	4.64613	6.53699	5.24006	6.41793	6.40103	6.5513
ARL4C	4.33305	3.75697	3.8989	3.73209	3.81994	4.1859	4.55769	4.83048	3.2466	3.25805	3.92634	3.0936	4.02088	3.94301	4.00237	3.81202	5.66986	4.69759	5.57694	4.02131	4.21055	4.19288	4.29913	4.03217	3.94258	3.76302	3.99533	4.04722	4.31356	5.18373	4.03349	3.78935	4.55318	3.71977	4.0658	4.11776	2.33023	4.61756	4.56672	4.86324	4.98011	4.75041	3.01712	3.65951	4.38922	2.43305	4.37113	4.55494	4.20279
ARL4D	4.70846	4.61676	4.87154	4.48013	5.51767	4.73387	4.86604	4.79923	5.48764	5.23687	5.40384	4.3118	5.34548	5.20426	5.21244	5.17919	5.59374	5.06293	5.00703	4.93142	5.02508	4.97855	4.75642	5.08217	5.10062	5.23765	5.3895	4.62706	4.5607	5.03445	5.62535	4.54904	5.34404	5.25072	5.59501	5.35522	5.5332	5.83722	5.57663	5.64641	5.5957	5.01192	5.09904	5.26746	5.63177	5.34087	5.49703	5.26254	5.47165
ARL5B	6.04544	5.95844	5.68766	6.20335	5.97698	5.99931	6.06105	6.08747	6.0858	6.10122	5.65849	5.6984	5.85045	6.38255	6.21461	6.28873	5.75858	6.4146	6.08945	6.35086	5.30666	6.25259	6.62784	5.91654	6.20405	6.15576	6.01491	6.4649	6.71624	6.72705	6.59722	6.45732	6.23273	6.05927	6.45619	6.34134	6.47507	6.32784	6.71119	6.41298	6.18853	5.98856	5.64231	5.71454	6.16675	6.20188	5.73642	5.79517	5.99722
ARL5C	4.26185	4.66613	1.49836	4.4443	2.31876	1.44191	4.5628	4.29356	3.9273	1.76632	1.82704	4.2587	3.05763	3.10542	1.85509	3.38276	2.65742	3.07945	1.76371	2.18263	1.59963	3.33134	3.18133	3.51454	3.8415	2.94308	3.63472	3.88535	2.72359	0.38922	2.60564	0.410913	3.16652	2.73323	3.01926	2.70199	2.5783	0.442848	3.02865	0.392197	3.0698	2.13561	2.5143	0.533073	4.42079	3.65056	3.25572	4.76854	3.88109
ARL6	5.00941	5.17724	4.9322	5.13322	5.03279	5.50599	5.03697	5.17305	4.75333	5.39973	5.2228	4.56464	4.64408	4.16102	4.62154	4.91807	5.06577	5.24927	4.57233	4.36444	4.52823	5.42696	5.49971	5.03176	4.56425	4.93556	5.21347	5.49926	5.36621	5.37713	5.2095	4.61024	4.64904	4.79287	4.91773	4.39867	5.09867	4.5676	5.16429	5.21872	4.98939	4.4497	4.64065	3.92684	5.06577	4.87845	4.68985	4.50765	4.60239
ARL6IP1	8.443	8.47396	8.16593	8.07015	8.2791	8.36868	8.51427	8.69084	7.81457	8.36765	8.75973	8.26891	8.35917	8.35917	8.3887	7.5528	8.99933	8.55229	7.63876	8.46817	8.18356	9.07673	8.58266	8.41236	7.76884	8.50653	8.41796	8.4114	8.21429	8.1995	8.13396	8.23994	8.61935	8.48337	8.34186	8.23994	7.94055	8.62558	8.4211	8.54437	8.41437	7.38597	7.41306	7.2903	7.95722	7.42034	7.66138	7.61481	7.75947
ARL6IP4	7.39104	7.7364	7.34957	7.50085	7.61931	7.73776	7.09647	7.47974	7.67945	7.23306	7.88915	7.31589	7.23082	7.36417	8.21934	6.89791	6.96931	7.29872	7.53743	7.79256	7.90748	7.39158	6.92356	8.02052	7.57066	7.70221	7.82325	7.91742	7.29594	7.47856	6.83499	7.56835	7.11332	7.50981	7.89866	7.44933	7.77482	8.07015	7.08614	6.78831	7.90304	7.78546	8.02472	7.69254	7.95201	7.69969	7.61019	8.03879	7.76884
ARL6IP5	10.181	10.0284	9.7467	9.9672	10.0322	9.90005	10.4288	10.2342	10.3938	10.2522	10.4496	10.3776	10.2724	10.036	9.73816	10.3574	10.3722	10.1316	10.0284	10.1583	10.0246	10.0132	10.4126	9.78509	10.1413	10.1583	10.4442	10.3477	10.2964	10.419	10.7599	10.2483	10.3574	10.2073	10.2622	10.0922	10.3477	9.98747	10.471	10.585	10.4828	10.2205	9.98434	9.93294	10.4442	10.2672	10.0922	10.1361	10.1984
ARL6IP6	5.42696	5.75291	5.73676	5.71874	5.74764	5.57872	5.41706	5.75926	5.12507	6.4289	5.39274	5.42827	5.22098	5.95658	5.63669	5.96464	6.42629	5.55931	5.46055	5.45695	4.75775	5.594	5.60506	5.65884	5.33743	5.43002	5.39023	5.81691	5.71067	6.06365	6.0878	5.61474	5.86879	5.849	5.62039	5.41228	6.02416	5.95489	6.35122	6.00828	5.46799	5.067	5.22893	5.1266	5.64534	5.22425	5.07792	5.42731	5.58391
ARL8A	7.3745	7.8973	6.92022	8.07092	7.02865	8.44396	7.45397	7.90975	7.29872	7.89515	7.58962	8.06583	7.51953	8.209	7.81169	7.51592	7.43941	8.11999	8.19143	7.86087	7.66869	7.30705	7.18755	8.45297	7.68166	7.25723	7.82562	7.89294	7.90605	8.09196	8.44223	7.65214	8.07577	7.94598	7.59804	7.73034	7.65214	7.58269	8.25765	8.38119	7.63007	7.51953	7.09297	7.26739	7.12415	7.1697	7.58269	7.1818	6.93601
ARL8B	8.99933	9.1348	9.14108	9.31494	8.99551	9.02827	9.18449	9.20558	9.11892	9.20384	9.02454	8.8391	9.18449	8.99933	8.95344	8.96225	8.78542	9.33634	9.17573	9.10199	9.01636	9.2971	9.18214	9.22901	9.03545	8.89318	9.0028	9.01447	9.2971	9.18214	9.43155	9.07139	9.09478	8.90937	9.14495	9.00121	9.10755	8.85989	9.15271	9.35981	9.13919	8.84957	8.83611	8.7954	8.94288	9.01084	8.74423	8.8842	8.80113
ARL9	1.53804	1.5392	1.21029	1.99514	3.52492	1.2133	1.53367	1.67444	1.4201	0.68572	4.67807	3.15509	3.40998	1.19459	1.01697	1.43978	1.66863	1.6032	3.16776	2.81337	1.85427	1.20415	1.79521	1.75998	3.09875	2.55426	3.16776	3.0657	0.472843	0.455223	0.499338	3.22437	2.39716	3.71297	2.64584	3.42415	0.453029	3.44706	3.48325	0.458605	0.460739	3.15566	2.52671	2.73125	0.470572	3.15804	2.62617	3.4789	2.03117
ARMC1	7.71584	8.04761	7.54046	8.45667	7.67459	8.13913	7.78696	8.03072	7.8486	8.07092	7.71661	7.90748	7.8401	8.21246	7.72129	8.06677	7.51654	7.91128	8.04688	7.58667	7.43941	7.90748	8.2651	8.28776	7.58667	7.54046	7.86231	7.81317	8.02407	8.13913	8.43752	7.75276	7.78964	7.48876	7.81599	7.67178	8.07484	7.79602	8.3503	7.91998	7.727	7.90171	7.56893	7.62307	7.63493	7.57876	7.78617	7.70659	7.7755
ARMC10	6.57725	7.0915	6.85348	7.14214	6.73081	6.89307	6.4915	7.1629	6.86934	7.1935	6.5513	6.79365	7.05804	7.35807	6.81359	7.30135	7.29534	6.83456	6.93089	6.41674	6.63033	6.72323	6.93557	6.75702	6.93353	7.04096	6.71704	7.12415	6.84873	7.01803	6.36495	6.71335	7.06405	6.62958	7.05846	6.35326	7.2159	7.1504	7.10134	6.86281	6.76038	6.80785	6.48489	6.47089	6.81656	6.58595	6.61043	6.81618	6.72366
ARMC2	1.55096	0.656679	2.901	1.13748	3.38908	4.16914	2.41902	1.77411	2.56692	0.797129	1.26347	1.34129	3.818	3.4981	1.24214	4.19438	3.74947	2.27847	0.224419	1.35193	1.3591	2.21415	2.57944	1.90273	1.3077	2.01983	3.07124	3.35738	2.90248	0.983194	4.44462	1.02349	2.33269	3.08633	1.74735	1.1793	2.88386	1.58519	4.04682	3.39697	0.971437	0.983194	2.59535	2.55426	0.982009	4.01777	2.19825	1.72425	1.29451
ARMC3	0.57298	1.21982	1.38822	1.77209	0.570405	1.71284	0.184664	1.03981	0.492729	0.7342	1.04145	2.36013	1.16415	0.118619	0.183154	1.12405	0.23556	0.108966	1.14557	0.68572	0.438287	0.0759132	0.945583	0.877622	1.3235	0.199184	1.17891	1.15365	1.17842	1.2133	1.23954	1.26244	1.15851	1.20913	1.16577	1.39344	1.17347	1.18558	1.20171	1.20522	1.19678	1.19903	1.23734	1.32106	1.20522	1.31197	1.1691	1.16014	1.16858
ARMC4	3.1569	3.38108	2.84531	3.64824	4.28998	4.31136	3.82625	4.09518	3.50241	4.23627	3.70148	3.78432	3.81648	3.28685	2.14104	3.60495	3.49587	3.62546	3.84253	3.76446	4.42673	4.12501	3.53263	3.70744	3.30183	4.08505	3.50178	2.79784	4.729	4.72102	4.15604	3.77706	4.39362	3.64441	3.9649	3.84979	4.08178	3.50524	4.01777	3.18133	2.95826	3.57492	4.65827	4.10751	3.87872	4.00867	3.03423	4.14147	3.71682
ARMC5	4.72535	5.10557	5.25855	5.07337	5.11235	5.19001	4.7508	5.28095	4.7407	5.32665	4.97893	5.73282	5.0754	4.69802	5.76752	4.94994	4.73885	5.20176	5.79157	5.37248	5.97415	4.95584	4.71885	4.99182	5.09671	5.08762	5.00181	5.82908	5.1904	5.62734	5.16115	5.46567	4.66725	4.86484	5.20133	5.23894	4.76552	5.42115	4.88417	5.08798	5.41861	5.47919	5.05243	5.47565	4.69519	5.26985	5.51091	5.47496	5.41745
ARMC6	5.5332	4.02658	4.7597	5.1521	5.19578	5.5012	4.74117	4.49042	4.69195	4.814	5.48101	4.63884	5.61144	5.09153	4.95196	5.25326	4.58041	5.31783	5.24471	5.13008	5.07835	5.21733	5.1464	5.06539	6.01855	4.97438	4.93624	5.58078	4.59309	5.18646	3.19517	3.74595	5.03402	5.29709	4.83926	5.09579	5.54395	5.00266	4.61311	5.06658	5.20017	5.40961	4.54465	5.20636	5.58721	4.61515	5.6552	4.98434	5.51701
ARMC7	4.36362	4.96902	3.92405	5.42008	4.06046	5.66568	4.49211	4.94953	4.56939	5.25072	5.20876	5.51902	4.8156	5.42453	5.74028	5.11019	4.49462	4.57908	5.21168	5.30172	5.06331	4.86904	5.62083	4.92136	4.32728	5.04582	4.73811	4.50723	4.01348	3.22676	5.43996	3.9407	5.27922	5.12082	4.41216	6.08747	3.91708	4.43409	5.75214	5.5906	5.351	4.80814	5.66491	5.51188	5.00181	4.6368	5.39023	5.27051	4.96404
ARMC8	5.83911	5.80725	5.64565	6.03538	6.07066	6.11864	6.02689	6.01761	6.10907	6.1262	5.76202	5.91158	6.12853	5.88413	6.57081	5.91442	5.92431	5.69337	5.83989	5.89132	5.71833	6.34409	6.3002	6.1218	5.70154	5.95071	5.97835	6.17444	6.17261	6.12657	6.09663	6.05671	5.77618	6.00828	6.166	6.20874	5.71907	5.6447	5.93037	6.12506	6.03325	5.90065	5.60506	5.69304	5.88892	5.95885	5.77878	5.62383	5.72707
ARMC9	2.38036	1.45613	2.90799	3.19263	4.23088	3.34431	2.45453	0.972791	3.18068	1.61247	3.09489	2.5426	2.16874	1.63794	2.70622	3.37419	2.71177	1.7678	2.69315	3.11546	0.93602	1.69367	3.32768	2.55785	3.6563	1.48523	1.72044	1.15142	1.17513	2.46435	3.73426	1.26041	3.15368	1.20522	3.20818	1.39082	3.08956	3.59131	2.37296	2.16997	3.38157	1.43661	3.96678	4.12552	3.36853	3.63419	3.44533	1.15693	2.90323
ARMCX1	9.12396	9.01084	8.84079	9.13713	9.05186	9.35019	9.15084	8.94644	9.20775	9.27529	9.25088	9.00444	8.87494	8.92532	8.86595	8.57814	8.58375	8.4114	8.81262	8.76115	8.96414	8.66851	9.00444	9.06762	9.30827	8.84678	8.91402	8.99139	9.22032	9.42454	8.54325	9.05555	8.91254	9.09863	9.14689	9.26884	9.39988	9.07307	9.11278	8.85408	8.7763	8.72703	8.59341	8.94999	8.73384	8.81962	8.73508	8.78078	8.70856
ARMCX2	7.27061	7.53243	7.64343	7.53243	7.1823	7.17689	7.33213	7.5494	7.39677	7.64702	7.57757	7.56835	7.14158	7.60476	7.59218	7.20354	7.77404	7.49033	7.77482	7.67682	7.56101	7.04608	6.92956	7.34198	7.36966	7.02614	7.12968	7.32935	7.66869	7.47561	7.01384	7.38046	7.56893	7.38549	7.50786	7.28851	7.25333	7.05173	7.68609	7.18537	6.7275	6.98115	6.97275	6.95611	7.36833	7.46963	7.59156	7.20536	7.64126
ARMCX3	8.62189	8.1844	8.46817	8.2923	8.2362	8.11024	8.55001	8.21351	8.92062	8.4211	8.39393	8.06251	8.27612	8.19242	7.74326	8.41437	8.16436	8.17139	8.26715	7.8958	7.98251	8.3406	8.97086	7.85505	8.34579	8.44087	8.42986	8.30162	8.6494	8.19699	8.14533	8.2923	8.34927	8.20703	8.4114	8.38649	8.19525	8.07256	8.2457	8.60385	8.01509	8.26326	7.57331	7.66993	7.76752	7.51042	7.94676	7.57569	8.38334
ARMCX4	4.11198	3.81294	3.35632	3.38276	3.40047	3.0657	3.27467	3.78836	3.91752	3.93012	3.50578	3.57826	3.60661	2.33643	2.9765	4.10879	3.51613	3.73943	2.93064	3.12938	2.22456	4.58527	3.77942	3.85753	3.41676	3.16199	3.15436	3.68777	3.13882	3.40161	3.23274	3.98414	3.4789	2.79712	3.92973	3.21243	3.262	3.61487	2.9401	3.89751	3.77296	3.72481	4.22328	2.32418	2.96763	3.24723	2.95226	3.43789	3.75194
ARMCX6	8.30941	7.66062	8.52909	8.03697	8.16519	7.63818	8.17623	7.9496	8.2791	7.71246	7.97707	7.72353	8.32384	7.80478	8.56865	7.53402	7.99543	7.8068	8.12471	7.90527	7.35055	8.00771	8.42012	8.22753	7.99633	8.25862	8.21246	8.26235	8.39393	8.40121	8.2417	7.78892	8.28689	8.08518	7.5528	7.99134	8.39298	8.14438	8.25571	8.46088	7.77404	7.94284	8.19344	8.07092	8.07394	7.73776	7.60961	7.68814	8.09885
ARNT	5.43996	4.96522	5.40644	4.77427	5.16924	5.09949	4.77265	5.17228	5.50188	4.42527	5.0788	5.01661	5.41004	5.17598	4.74949	5.23894	5.62909	5.49703	4.32728	5.44401	4.94809	5.10356	5.10136	5.08403	4.89151	5.23284	5.29518	4.73234	5.32994	4.67272	5.29028	4.64995	5.43409	5.36909	5.12314	4.97024	4.82974	5.22467	5.29185	5.25219	4.79751	5.13685	4.39653	4.2623	4.65948	4.78046	5.04732	5.05012	4.989
ARNT2	4.36743	3.63361	5.57872	5.10513	5.39391	5.37537	5.0431	4.10144	5.17598	4.78131	5.15064	4.46008	4.50386	4.17179	4.66725	4.75333	4.10967	3.53434	5.63955	4.2632	4.05559	4.91362	3.92488	5.21946	4.3814	3.96109	2.36013	4.7625	4.84783	3.85753	4.3992	4.49084	4.72058	4.61756	4.91362	4.30144	4.45007	4.47842	4.74697	5.01313	4.12501	5.39501	4.88297	4.49297	4.2779	4.9728	4.46582	4.28998	4.46808
ARNTL	2.62519	2.90178	1.72967	1.40664	5.86406	5.89757	5.83015	5.83989	5.13246	5.41861	5.1904	5.20565	3.2796	3.82132	5.32236	5.24927	4.63932	5.82708	4.3862	5.60677	5.42731	6.06884	6.60366	4.67439	5.08255	5.97735	5.78128	5.48801	5.02657	3.72172	5.40571	3.38108	4.04593	4.25149	2.88121	3.59811	2.89859	6.76723	2.51248	2.93565	4.41041	5.10872	3.98232	5.24891	4.61478	4.96561	5.35881	4.84649	4.00094
ARNTL2	1.42314	1.33093	1.26347	1.73869	1.16116	1.21982	0.008606	0.708972	1.35575	1.5664	1.02293	2.80833	0.470572	1.93405	1.7419	1.13411	2.57407	0.757468	0.801703	0.22075	0.681525	0.663459	2.26802	0.959876	0.829923	0.939131	1.64849	1.65358	1.6691	1.70382	3.50524	1.75451	1.64677	1.69621	1.66008	1.95462	1.65358	1.66503	1.68307	1.68189	1.67834	1.66863	1.7118	1.81583	1.68124	1.8181	1.65658	1.65186	1.63949
ARPC1A	8.50087	8.55437	8.36968	8.75173	8.69084	8.7408	8.87494	8.93476	7.87029	8.41796	8.50884	8.75329	8.5	8.72426	9.13095	8.0166	7.69519	8.67359	8.61542	8.9237	9.17573	9.00578	7.76752	9.17765	8.66348	8.44223	8.72297	8.63266	8.60512	8.76545	8.44396	9.06304	8.41565	7.80903	9.0803	8.03879	8.50884	8.14268	8.7557	8.51126	8.78078	8.76273	7.93466	8.20023	8.5423	8.31801	9.06762	8.95344	9.06304
ARPC1B	7.39791	7.22447	6.86239	7.00356	7.12252	6.86787	7.69326	8.07092	6.92182	6.69759	6.2177	6.8777	6.92747	7.11482	6.85547	6.80024	9.33399	7.10593	7.49135	7.21995	6.87561	7.09297	7.28701	6.882	7.49085	7.50981	7.07085	6.72323	7.51654	6.54309	6.74949	7.86801	6.61082	6.67878	7.30309	7.00172	6.97143	7.64468	6.79111	7.72	7.52987	7.35807	8.26798	7.88769	7.49365	6.80193	7.26739	7.45046	7.4708
ARPC2	9.61515	9.48019	9.47764	9.30143	9.43865	9.09863	9.60985	9.53965	9.39715	9.23368	9.20558	9.26645	9.37373	9.1741	9.38268	9.2384	9.77867	9.20384	9.3389	9.27775	9.42906	9.21442	9.77292	9.15271	9.71209	9.53407	9.40258	9.62806	9.32998	9.35981	9.46779	9.68006	9.66381	9.52849	9.46779	9.32142	9.62555	9.49895	9.64975	9.78509	9.62555	9.44544	9.60684	9.63603	9.6525	9.61515	9.4339	9.66139	9.72754
ARPC3	7.97863	8.75841	7.52246	8.47801	7.32228	7.46057	7.71246	8.8111	7.62876	8.13486	7.64702	8.06756	7.50141	7.8068	8.36507	7.72631	8.89818	7.92319	8.07394	8.10607	7.68353	8.08684	8.30658	7.81099	7.39445	7.57449	8.63036	7.94439	7.72421	7.51105	7.69519	8.27612	8.01277	7.96434	8.06186	7.78485	8.5277	8.49024	7.91434	7.96897	7.60215	8.05508	8.00386	8.13396	7.87114	8.10607	8.20537	8.10794	8.00547
ARPC4-TTLL3	3.31759	3.84105	3.47031	4.33351	1.95062	3.26451	1.83962	3.50067	3.32226	3.74039	2.47443	4.49675	3.23917	4.61182	4.46305	3.67485	4.86646	3.18427	1.60562	2.47573	3.50476	3.9601	3.22863	3.0397	3.1614	3.61034	4.31006	4.69026	1.93489	3.19888	4.48051	2.02879	1.89125	1.96141	2.66189	2.31876	3.39368	4.40529	1.93489	1.94231	4.42626	2.48184	5.21132	3.00122	4.63717	3.94654	1.90526	3.22808	4.25964
ARPC5	7.78065	7.16335	7.27312	7.41586	7.32123	6.87114	7.07267	7.30602	7.10938	6.8996	7.14566	7.09892	7.27566	7.02951	8.10953	7.09405	8.23122	7.20144	7.21422	7.47974	7.48137	7.10456	7.14418	7.79661	7.70029	7.47974	7.59942	6.842	7.39158	7.06127	7.52366	7.2896	7.74798	7.57757	7.17065	7.64579	7.47187	7.87273	7.51953	7.56283	7.25723	7.27476	7.25175	7.30827	7.29975	6.99771	6.87336	7.08434	7.45232
ARPC5L	7.2618	7.29442	7.78754	7.56337	7.53796	7.59278	7.60476	7.30429	7.54775	7.33481	7.27414	7.1353	7.34415	7.14117	7.76612	7.36479	6.90807	7.57387	7.76289	7.4388	8.08914	7.46843	7.38478	7.90527	7.74581	7.45529	7.70917	7.50141	7.55735	7.30541	7.3174	7.73445	7.18333	7.45478	7.502	7.53519	7.55042	7.30921	7.14848	7.42631	7.64343	7.8543	7.5261	7.51953	7.50254	7.32996	7.4321	7.44517	7.28365
ARPP19	8.34676	8.42754	8.3406	8.28861	8.5423	8.60245	8.45182	8.5277	8.28504	8.73115	8.30073	8.64183	8.45297	8.99735	7.73705	8.4637	8.62189	8.50556	8.30162	8.5513	8.32496	8.57571	8.86432	8.64183	8.67638	8.64051	8.44633	8.84366	8.65599	8.87028	8.79677	8.73384	8.55001	8.32496	8.65599	8.23519	8.71511	8.53129	8.9237	8.84678	8.5861	8.08074	7.993	8.14533	8.50087	8.30762	8.56974	8.58864	8.53373
ARPP21	0.154631	0.568939	1.08556	2.97068	1.13253	1.63388	1.02349	1.82333	1.26513	0.627871	1.85509	0.743737	1.20225	1.62296	0.939747	1.35193	0.178692	0.580147	1.07091	1.42615	0.899145	0.963851	1.39082	0.899145	1.69367	1.02955	1.28614	0.82764	2.98496	2.13442	3.02642	0.902902	0.834431	2.27953	2.67249	2.71776	0.829078	0.851127	2.81945	0.857249	3.91238	0.866465	0.919431	2.76823	0.861606	2.73621	0.822852	0.809076	1.06719
ARR3	1.60261	3.65817	3.41732	3.98876	1.73293	4.16633	2.85115	3.50308	0.131673	0.833771	0.119611	4.65595	0.658849	1.06064	3.14254	2.27847	1.64113	3.04177	1.7678	1.79521	2.47906	1.56693	1.75797	3.76859	1.29774	3.47209	0.814882	3.80664	4.25149	4.6012	0.874871	5.01192	0.810735	5.0447	3.57167	1.02955	0.805854	4.75123	3.06775	2.51759	5.23422	0.842761	4.5563	3.59748	0.836841	4.4596	0.803272	3.87872	0.813113
ARRB1	5.85281	5.26985	5.9399	5.26523	5.89301	5.32045	5.76936	5.70121	5.94679	5.40607	5.75327	5.63782	6.19457	5.65234	5.65817	5.48649	6.6445	5.57584	5.86371	5.72376	6.02552	5.72633	5.64374	5.64501	6.21737	5.67807	5.88003	5.5836	5.64968	5.73388	5.43144	5.69077	6.21985	5.57127	5.57246	5.85489	5.30832	6.13362	5.89649	5.81338	5.79586	5.81302	6.1218	5.69941	5.64064	5.96435	5.65341	5.57344	5.49845
ARRB2	2.62617	2.86906	3.59338	3.00051	2.21922	3.10347	3.63812	4.15647	3.06109	-0.847811	1.61024	2.94308	3.16443	2.3873	3.2491	1.38549	6.77047	3.86034	4.27313	1.52463	0.804956	1.52964	2.39991	3.88874	1.86033	1.87468	2.44273	4.0813	2.08054	2.13719	2.14231	2.16765	2.0414	2.11486	3.97337	3.99242	2.08054	2.06809	5.63748	2.07733	2.57109	5.2228	2.11883	5.55623	2.07733	2.24925	2.05085	2.05784	5.38362
ARRDC1	4.98127	4.74239	5.2305	4.5773	5.09517	4.40864	4.84649	5.32778	5.34579	4.5369	4.23993	4.17936	5.11305	4.32064	5.88413	4.68043	4.81522	4.83407	4.8531	4.33681	4.70453	5.10097	4.58742	5.06741	5.23088	4.89647	4.34321	4.72411	3.94019	4.1859	4.6094	4.63511	4.85147	4.42527	4.52353	4.15506	5.05166	4.97024	4.55162	4.48334	5.47427	5.04016	5.6197	5.56064	4.9322	4.23669	5.17426	5.19819	5.02746
ARRDC2	6.62259	6.15337	6.14596	6.21087	6.15677	6.35892	6.20079	6.35817	6.50519	5.99624	6.45542	6.39912	6.12139	6.20621	4.70534	5.17305	5.87962	6.33116	5.42324	5.67358	6.22273	6.12001	5.26088	6.21538	5.52259	5.54546	4.61636	5.54616	4.79151	5.42796	5.68731	6.15372	5.36108	5.41406	5.53864	5.43522	4.65633	5.64023	5.35773	6.24459	6.41376	5.89372	6.45092	5.39792	8.12159	6.0672	5.92896	5.2106	6.26508
ARRDC3	7.79256	7.63305	7.65478	7.92319	7.90975	7.36256	7.55681	7.71584	7.75549	8.1375	7.4275	7.29534	7.31469	7.31643	7.20696	8.05322	8.12397	7.5031	7.17741	7.07943	6.82569	7.05173	7.36791	7.35349	7.1823	8.00003	7.61074	8.10051	7.79537	7.59218	7.82484	7.26406	7.92244	7.13157	7.60706	7.00631	7.74798	7.45046	7.67621	7.90023	7.16386	6.87561	6.25517	5.80095	7.30255	6.72412	7.04476	7.12557	7.40088
ARRDC4	6.92278	6.56158	7.52014	7.88552	6.69494	7.06029	6.34134	6.21183	7.51893	7.39849	5.87132	5.78096	6.96114	6.93396	6.90807	6.54903	8.30941	6.74628	6.9764	7.15879	6.63974	6.80146	7.02021	7.38647	6.35704	6.25583	6.3452	7.08784	6.32473	7.72353	7.00263	7.31966	6.17261	6.92919	6.64841	6.87561	6.24638	7.09943	7.49191	7.67044	5.64883	6.70613	5.98386	6.64841	6.39113	6.79841	6.86567	6.20151	6.1704
ARSA	2.97068	3.54692	2.71474	3.24843	3.12207	2.82189	3.45026	4.47368	2.99109	1.16294	4.31574	3.78735	1.24324	0.83516	3.06917	3.62104	3.67733	4.51953	3.32345	0.9678	2.2956	0.346098	1.8368	3.49355	3.94791	3.10542	5.1228	3.43156	1.46558	2.79631	3.00191	3.9864	1.43828	1.49327	3.10725	1.69621	1.45258	3.80664	1.48226	1.48427	4.48608	1.47528	3.48011	1.60852	3.05655	4.18371	4.92697	4.93523	4.08178
ARSB	4.39528	5.19578	4.53782	5.60677	4.28834	4.73059	4.65422	4.8105	4.42223	5.22098	5.41374	4.99335	4.51581	4.93792	4.26052	5.29857	4.74811	5.05727	5.15248	4.10508	4.2587	4.59048	5.10168	4.53652	5.09949	4.99663	4.63594	4.94437	5.64064	4.76976	5.0864	4.95196	5.00941	5.13322	5.32665	4.68685	4.92468	4.11057	5.02589	4.9728	4.85147	4.77391	5.06417	4.57819	4.9766	5.1346	4.77225	5.16994	4.63292
ARSD	4.48051	4.05415	3.62104	4.53247	2.96464	3.0397	4.34822	4.46582	4.30017	3.83265	4.24871	4.18505	4.4155	3.29526	3.91326	4.62499	4.51706	4.13934	3.82528	4.00822	3.46009	3.3373	3.86231	4.23129	3.66496	4.32362	4.44021	4.1019	4.71935	3.86231	2.14104	3.85848	4.29398	4.61392	4.35511	4.32529	4.43614	3.42679	3.3987	3.42737	3.9156	4.90453	4.87028	4.2492	3.04936	4.87998	3.91469	3.87089	4.713
ARSE	3.38658	3.75103	2.75617	4.2023	3.88932	1.6045	3.19568	1.92693	3.65514	0.643724	3.32226	4.23711	3.43735	2.54577	1.40018	3.02494	1.42314	3.36494	2.407	3.70358	1.98272	2.40564	3.14314	0.764351	2.00306	3.30318	3.62834	3.58823	2.85458	3.97653	1.05598	1.0636	0.977435	2.56486	4.44506	3.58773	3.92488	1.00697	1.01752	1.01649	1.93961	2.26384	2.08203	3.32634	4.16019	4.06921	3.50476	2.55657	3.29047
ARSF	1.05243	0.183896	1.70506	0.529779	3.97851	1.63674	0.597049	0.972104	4.85845	2.227	4.39133	0.99074	4.56891	0.533073	1.46116	2.89481	2.50465	2.65984	1.20105	3.54553	2.9231	2.5607	1.58691	2.06574	2.1905	1.06606	0.427274	2.9998	3.33852	3.88394	3.24786	2.95769	2.86906	3.85848	3.7207	0.6166	3.45911	2.57726	0.397313	0.415783	0.417745	4.16732	0.512809	0.560386	3.52146	0.555918	3.06851	3.9701	3.32103
ARSG	4.31886	3.65215	4.76635	3.84979	3.99846	4.04296	4.15971	4.64408	4.14603	4.61987	4.28713	4.50645	3.97337	3.82092	3.89133	4.12634	3.99533	3.80457	4.37241	3.69725	4.19781	4.74018	3.47833	3.5897	3.59131	4.85464	3.65413	3.76699	2.2956	3.83318	4.00196	4.15741	3.48816	4.08037	3.88492	4.1046	4.37201	3.47604	3.66947	3.69434	4.29731	4.64377	2.74181	4.41765	4.21313	3.96109	3.52926	3.5582	3.49587
ARSI	0.290941	4.7457	0.956027	0.237583	0.58873	0.878279	0.446691	0.290941	0.0470249	1.04092	0.884243	1.80199	1.34415	4.21701	0.770316	1.50313	1.49118	3.33301	1.51354	1.63388	1.11601	0.0350701	1.06975	0.164216	0.542348	-0.518168	0.905228	0.893035	0.910741	0.929688	0.969028	0.973468	0.901351	4.88576	3.04791	1.13307	0.903566	0.9259	0.936693	0.932288	3.37089	0.934659	5.89132	1.05476	0.939131	1.04544	0.892337	3.50241	3.44595
ARSJ	3.89645	3.04566	1.32669	4.44204	4.00568	3.10859	3.91891	3.96909	3.76446	4.02314	0.996326	2.11759	3.65321	1.7612	3.49522	3.99051	2.69511	1.37901	1.532	3.47768	3.13697	4.06	4.98089	1.49219	3.77942	3.63648	3.76802	2.32516	4.50219	3.15176	3.56079	2.22197	3.41793	1.86645	4.03071	0.929093	3.41288	3.30183	3.30797	3.39919	3.80873	4.5698	2.57407	4.22871	3.30318	2.79631	3.63039	2.18668	3.12867
ARSK	4.41178	4.39362	3.73787	2.76647	4.21446	4.57401	4.63838	3.52544	4.66454	3.66793	4.41041	3.78836	4.75928	4.12996	2.80228	4.09565	4.54255	4.13887	4.10508	3.55644	4.30272	4.35902	4.64338	4.20876	4.40305	4.23215	4.06442	4.29518	4.21055	4.50723	4.4366	4.56939	4.30962	4.57819	4.48552	0.42284	3.85411	4.04867	4.51131	3.74849	4.38276	4.14653	4.27092	4.36444	4.65422	3.9439	4.59752	4.21923	3.78836
ART1	3.78778	4.18769	4.03308	4.50046	3.90031	4.09339	3.12574	2.97781	4.16195	3.67235	4.03024	4.08789	3.79333	4.29731	4.05596	3.36853	3.52146	3.90233	3.3521	4.52949	4.25784	3.35331	3.86683	4.70402	3.40998	4.05596	4.01024	3.75905	3.60703	4.36362	2.65742	4.22557	4.14554	4.10363	3.59395	4.19237	3.82873	3.92591	2.93292	3.23603	3.60219	4.44841	4.06232	4.06	3.91326	3.63969	3.61951	3.99189	2.90555
ART3	8.14087	9.05756	9.36892	8.4191	9.80339	9.71494	8.47026	7.92078	8.03444	8.57208	9.00755	8.84366	8.52657	8.67789	9.18655	8.40121	9.36206	8.81962	8.82571	8.89024	9.44989	8.81262	7.13941	8.95176	8.74669	9.1429	9.17573	8.66851	8.7954	9.58078	9.19972	9.08741	9.30143	9.28604	9.22481	8.78362	8.71643	9.43865	9.49895	8.38026	9.10063	9.16246	8.79261	8.64183	8.46606	9.28414	9.34354	9.3879	7.32996
ART4	5.54616	5.402	4.60419	5.19344	5.67193	5.49773	5.2478	5.93037	4.5773	5.23214	5.60777	5.19407	5.5194	5.44066	3.9397	4.81119	6.75315	5.50263	4.75444	4.56029	4.17758	6.21461	4.94726	4.93747	4.59137	4.56235	4.1019	4.98691	5.0099	5.36472	6.05519	4.78897	6.0277	5.20755	4.99374	4.88297	5.58613	4.73348	5.59638	5.57803	4.71506	5.57344	3.92876	4.1859	5.33975	5.03279	4.8527	5.12778	5.74922
ART5	0.641457	1.56411	1.0005	1.42799	1.23734	1.429	1.77072	1.27274	1.14557	0.446691	1.48627	0.899891	0.550619	1.42462	1.22811	0.662158	0.248132	1.09406	0.740315	2.10995	0.769385	0.828316	0.621454	1.31306	1.07037	0.290941	1.48469	1.47272	1.49952	1.53559	1.55565	4.79792	1.47019	1.52607	1.48427	1.73229	1.48791	1.49836	1.51297	1.52044	1.50419	1.50263	1.54762	1.64057	1.51526	1.63447	1.49013	1.48427	1.47074
ARTN	0.693984	1.46503	1.43609	0.793956	1.50765	1.39597	0.83516	1.40612	0.718163	0.939747	0.770316	1.37471	0.763334	1.56589	0.953964	1.16694	0.83516	1.85509	0.866465	1.89378	0.957322	0.893035	-0.176382	0.371782	1.06417	0.966458	1.64291	1.64735	1.6623	1.69847	1.71284	1.74871	1.63891	1.69076	1.65416	1.94522	1.64677	1.66058	1.67661	1.67444	1.67157	1.6645	1.70561	1.80847	1.67556	1.8099	1.65142	1.64618	1.63329
ARV1	7.37503	7.18666	7.77482	7.22815	7.8388	7.33328	7.7776	7.25222	7.73509	6.83322	8.11529	7.5042	7.5528	7.58555	6.86747	7.78197	7.47799	7.49085	7.21264	7.2577	7.40913	7.28254	7.8973	7.32446	7.56337	7.993	7.44825	7.77013	7.31142	7.57066	7.43764	7.38165	7.61481	7.73915	7.43995	7.26567	7.79324	7.6901	7.45171	7.32347	7.47744	7.69914	7.90304	7.53573	7.74731	7.35538	7.31803	7.45584	7.08519
ARVCF	2.16399	1.89018	4.12501	1.55565	3.87958	2.21689	3.88492	1.08556	3.07448	1.53861	3.63702	0.845759	3.90996	0.708062	4.3244	2.2413	0.838873	2.70846	3.46116	3.27726	3.82625	2.96763	1.84191	4.55535	2.86228	1.09717	1.99864	1.97925	5.90882	2.07153	2.06435	2.10995	1.97239	3.30797	5.03445	2.38036	2.00523	2.00086	2.01859	2.00643	4.92591	1.98053	4.45007	2.1905	2.00086	4.61676	1.98705	3.59395	1.95569
ARX	1.10681	3.17199	1.53258	3.17891	1.74381	3.5897	1.59496	3.31836	0.688757	3.59962	1.5636	4.58363	1.15851	2.58654	1.36297	1.38881	1.80634	3.19263	3.12449	4.03071	2.97781	1.01461	2.2838	2.08842	2.00418	1.37373	1.70742	1.71284	3.4789	4.08373	1.77478	2.58654	1.69847	2.39843	1.71473	4.6509	4.29041	3.82038	4.21353	3.99765	2.31184	1.72231	5.067	2.71274	1.73554	1.88691	1.71284	3.86281	1.76191
ASAH1	10.4349	10.6754	10.5793	10.4239	10.6977	10.7133	10.3776	10.8088	10.2241	10.5485	10.145	10.2565	10.6754	10.8088	10.2031	10.5981	10.7599	10.2919	10.439	10.7703	10.3621	10.3938	10.6382	9.94617	10.6977	10.3524	10.4349	10.5371	10.6977	10.5062	10.7382	10.6894	10.6677	10.4659	10.5485	10.4602	10.5124	10.4997	10.7995	10.7465	10.5547	10.383	10.2964	10.4349	10.6977	10.3681	10.3524	10.383	10.419
ASAP1	7.31966	6.90048	6.8208	6.66884	6.52811	6.321	6.48922	6.37361	6.94809	6.71704	6.50054	6.13255	6.57847	6.41234	7.62942	6.20366	6.76305	5.95524	5.98893	6.5632	6.5135	6.79196	6.71157	6.58716	5.83989	6.19885	6.468	6.52157	6.47128	6.49801	6.83866	6.58558	6.92128	6.63192	6.29689	6.2278	6.52811	6.08644	6.40577	7.16826	6.51701	6.39113	6.57121	5.68558	6.13182	6.47971	6.01119	5.98496	6.92182
ASAP2	7.51475	6.87561	6.91601	6.71248	7.53349	6.67085	6.84695	6.94809	7.11129	6.81398	6.57997	6.38963	7.32723	6.59344	7.87427	6.98161	6.95662	6.57887	6.24459	6.99234	6.59757	6.74794	6.76343	6.53164	7.00945	6.87602	6.88371	6.3811	6.62993	6.42591	7.27414	6.9986	6.89215	6.94396	6.54104	6.82697	6.73787	7.36203	7.20394	7.6168	6.97328	6.58799	6.62472	6.65606	6.62656	6.75824	6.61947	6.84969	7.01435
ASAP3	5.30247	4.88648	5.23687	5.4687	5.56124	5.70192	5.82137	5.38648	5.5079	5.70961	5.55446	5.93645	5.31417	5.92234	6.2632	5.43707	5.5903	5.77071	6.38295	5.60059	6.20079	5.44029	5.34548	5.16084	5.6984	5.72087	5.84579	5.55185	5.59827	5.57246	4.61064	5.78491	5.48548	5.46386	5.55722	5.97804	5.3581	5.5417	5.29474	5.10136	5.37422	6.13144	5.94379	5.9673	5.94454	5.63669	6.31679	6.03231	5.96583
ASB1	5.53826	5.49602	6.10165	5.63711	5.87693	6.06365	5.43665	4.83689	5.89132	5.36255	5.84307	5.75291	5.88413	5.70671	5.87759	5.85617	5.35735	5.35881	5.05243	6.10565	5.24996	6.05671	5.60474	5.80725	5.96286	5.52011	5.03176	5.14087	5.4926	5.91412	5.18606	5.73096	5.43522	5.5903	5.72526	5.34698	4.8245	5.44567	5.17266	4.78897	5.23805	5.60709	5.35134	5.37612	5.41861	5.20565	6.06105	5.98999	5.31783
ASB10	1.15026	3.14254	2.68203	2.2772	2.97374	2.84772	1.98591	1.83518	1.71344	2.33643	3.27001	1.57486	2.40234	2.79126	2.40807	1.48896	0.197423	1.68898	0.221297	0.578668	3.62104	2.74181	0.420545	1.95687	2.39213	1.87223	2.06809	2.03919	2.06921	2.1231	2.12431	2.15922	2.02879	2.10363	2.04976	2.41515	2.06574	2.05552	2.07042	2.06316	2.07859	2.29431	2.11219	2.23727	2.06316	2.23843	2.0414	2.04039	5.81448
ASB11	4.94511	6.33528	5.24593	5.29558	4.713	4.94063	4.60746	4.17846	5.10322	5.79683	4.80012	5.71833	5.26553	5.86913	3.60441	5.69541	4.92384	5.22708	5.79823	3.45131	4.99709	5.21465	5.45353	4.96172	5.51701	6.01342	5.83574	5.61577	4.9422	5.993	5.57524	4.65129	4.58605	4.95241	7.29765	5.24471	5.81584	6.45501	6.38963	4.79021	4.71093	5.03491	4.02612	4.87952	4.91945	5.60028	5.52882	4.20926	5.23171
ASB12	1.44237	3.37703	4.30144	3.37888	4.43929	3.46396	4.52433	3.52804	3.74395	0.656679	2.23097	2.75908	4.11378	1.88691	0.0564759	4.23838	2.93711	3.61999	4.27524	3.72172	3.59904	3.58309	4.48239	3.3521	4.03603	3.9883	4.29356	5.05393	3.96591	0.413482	4.20279	0.43619	4.46264	4.39403	4.87396	5.96169	5.25072	0.455223	4.66929	4.22911	5.08065	4.3657	4.51246	5.24741	4.75444	0.549089	4.78816	3.75597	4.23045
ASB13	7.0162	6.94045	6.69671	6.9879	6.46538	7.20897	5.81164	6.19291	6.45965	6.98751	6.42267	6.56393	6.45255	7.1802	5.82872	6.52365	6.28698	6.46586	6.22708	7.2752	7.01971	6.60324	6.03925	6.44174	6.608	6.96205	6.44174	6.24567	5.58688	5.81134	6.06034	7.19746	6.88898	6.63379	6.28125	6.61157	5.84937	6.75858	6.65521	5.97735	5.22667	6.61347	6.59069	7.12161	6.74539	6.01565	7.00631	6.44095	6.31434
ASB14	3.20629	3.74595	3.96632	3.37765	4.51669	3.88681	4.72235	4.25476	4.83168	4.14653	3.97851	4.83536	4.25051	2.29045	3.78977	4.1859	3.28135	1.90832	3.69053	3.00122	5.51732	4.57951	4.13759	4.28873	5.69798	4.75733	3.80405	3.93783	5.70993	4.84951	4.63252	4.71182	4.33549	4.96172	3.53094	4.99015	1.88003	4.9097	3.60495	4.8217	5.03935	3.16652	3.15061	6.96024	4.43245	0.786285	4.25476	4.38959	3.55692
ASB15	5.88218	5.63275	5.72707	5.65481	5.65125	5.24996	5.2228	4.14509	3.49205	4.95913	6.02074	5.37824	5.08333	4.74018	4.26595	5.11346	3.98467	5.27225	4.83168	3.42846	5.9399	5.24857	4.84783	5.02919	5.00941	5.46758	5.49338	5.77521	5.76451	5.94644	5.25035	5.87021	4.64292	5.4788	6.34299	5.93948	5.05802	4.79709	4.36943	4.60009	5.90774	4.56891	3.26	5.17954	5.13426	5.76031	4.95455	4.84613	4.88879
ASB16	4.0434	4.39226	3.37538	4.09518	4.32362	4.97357	4.3083	4.37516	5.00104	3.88874	4.72102	5.87424	4.68985	1.45774	6.14128	3.78534	3.60341	4.30413	4.43974	2.96037	5.68836	1.54813	3.65715	3.79542	4.24966	3.11468	5.25776	1.2225	5.60398	5.93419	5.27767	1.33141	5.50979	5.60947	3.51508	3.69481	4.96691	4.50386	5.7152	5.03049	5.32083	1.26091	5.64968	5.74511	1.27792	5.53249	5.14363	1.23097	1.23469
ASB17	3.47656	1.0648	4.10699	1.12896	0.574466	4.11378	0.479233	3.34949	2.2008	3.86569	1.11328	0.825159	1.13748	1.6589	0.860199	1.30933	1.39395	1.0194	1.35147	0.894878	2.93429	1.51354	1.70208	3.02795	1.77282	1.65082	0.359418	2.73227	0.355709	1.25211	2.94974	2.50708	2.55866	0.349119	3.71135	0.543969	0.343142	3.18011	2.83202	0.355709	2.89315	3.22863	3.57222	0.504016	1.86719	0.489294	2.6369	3.0816	2.26254
ASB2	7.31093	7.8153	7.72555	7.52181	7.96052	7.92953	8.05841	7.91128	7.13719	7.09699	7.69461	7.65802	7.49033	7.60765	7.38891	7.2448	6.41948	7.09064	7.43317	6.93997	8.15391	7.588	7.22199	7.74939	7.7568	7.20247	7.8486	7.68002	7.54109	7.87114	6.64752	7.2982	7.17065	7.30309	7.55518	7.47509	7.70917	7.27061	7.40382	6.72452	8.03526	7.7009	7.80957	7.97707	7.88991	7.93737	7.77282	7.89364	8.17892
ASB4	3.16199	3.29778	4.33228	4.11594	4.62364	5.08255	5.00181	4.14839	4.71137	4.94726	4.14839	4.41382	3.53711	4.17609	4.40707	3.8514	3.74652	4.0658	4.17891	4.10314	4.03737	4.4792	3.71245	4.38959	3.89842	4.17891	3.80457	4.05647	4.76635	4.12897	3.56033	3.85411	4.29865	4.89151	4.61867	3.76004	4.16591	4.07645	4.30144	4.16958	3.6744	4.36186	4.48741	4.54992	3.45292	4.13421	4.20004	4.14234	2.90799
ASB5	5.57023	6.1591	5.922	6.36847	5.98137	6.36807	6.47659	6.56625	6.19392	6.47734	6.12109	6.34372	6.01606	6.2278	5.1904	6.50131	5.769	5.94312	5.4788	5.65664	5.52435	6.10794	6.30529	5.81513	6.93781	5.92683	5.59858	6.1769	6.06998	6.26253	6.55949	5.13008	6.39006	6.69671	6.06585	6.09447	6.40804	6.11714	6.35048	6.46055	5.65273	5.67495	5.9654	5.78128	5.85979	5.53423	6.04034	5.31597	4.97402
ASB6	4.89359	4.87114	4.18371	4.28751	4.07562	4.96902	4.75164	5.10513	4.81803	4.85189	4.61182	4.68342	4.59427	4.46899	4.42841	4.7855	4.94099	5.12241	4.731	3.89044	4.88135	4.21009	4.7597	4.96781	4.95624	5.12932	4.59787	4.70672	4.0961	3.8514	4.7485	4.36854	4.2109	4.7485	4.8853	4.6123	4.59664	4.82636	3.98745	3.74294	4.50386	4.94638	5.40782	4.7257	4.74949	4.74609	4.92468	4.75482	5.009
ASB7	5.29558	5.49773	5.47958	5.30984	5.05696	5.61184	5.41374	5.34285	5.42115	5.33139	5.55897	6.00515	5.58145	5.62734	5.01661	5.47565	5.34728	5.51482	5.41268	5.24996	5.7462	5.09517	5.68836	5.56202	5.08438	5.73072	5.5233	5.64231	5.47098	5.62535	5.77107	5.58957	5.69137	5.49804	5.57488	5.49635	5.849	5.43707	5.88661	5.83195	5.23214	5.26119	5.57803	5.17191	5.27449	5.24114	5.81797	5.55867	5.23765
ASB8	7.69914	7.95807	8.12979	8.14629	8.12312	8.20638	8.07318	8.09885	7.95555	7.68233	8.04369	8.36402	8.07256	8.03153	7.27476	7.97212	7.74265	7.69591	7.96126	7.76752	8.09885	7.72353	7.75349	7.63364	7.99543	8.14892	7.82768	8.40306	7.80339	8.19242	7.68746	7.98801	7.74063	7.69461	7.62685	7.50085	7.86866	7.69723	7.76212	7.68353	8.30471	8.16937	7.93232	8.26891	8.26593	8.11024	8.1995	8.03954	7.95028
ASB9	3.2796	4.77515	4.04994	4.99226	4.30453	3.54692	4.3445	5.15811	3.22616	4.3875	4.33766	5.24399	4.41719	4.76683	4.33591	4.20804	4.22192	4.37909	3.88535	5.7589	4.86723	3.67391	4.29688	4.21879	3.57004	4.4357	3.74197	3.78637	4.3576	4.48853	4.99709	5.04095	4.12634	4.5369	4.87636	4.83211	4.61826	5.46531	4.80814	4.16633	4.08789	3.85559	3.59654	3.50738	3.29846	3.97561	3.43	3.14314	4.09436
ASCC1	6.80325	6.80544	6.96388	7.17115	7.34681	7.29975	6.78616	7.03374	6.72969	6.94629	7.28254	7.1844	7.37338	7.13719	6.66514	6.97874	7.24018	7.34415	7.1731	7.00124	7.23507	6.89442	7.47856	6.61742	6.65688	6.90305	6.88738	7.23507	6.91154	6.90262	7.33328	7.35293	7.10781	7.09647	7.07128	6.35487	7.24531	6.93308	7.17172	6.90522	7.11129	7.06262	6.63507	7.17638	7.35807	7.05722	7.24167	6.9844	7.15143
ASCC2	5.84126	5.92755	5.7816	6.24601	6.21985	5.79759	5.91115	6.17303	6.10377	6.0999	5.33437	4.34772	6.73907	5.4949	5.57127	5.95407	6.62958	5.72446	6.57121	4.77755	5.62426	4.83969	5.9693	5.72152	6.04364	6.72705	6.1005	6.06292	5.29926	5.10168	4.71017	5.65989	5.47384	5.23088	6.16206	5.78376	5.64602	5.05049	4.50996	4.07483	5.04016	6.20554	6.04182	5.77986	6.21461	6.27934	6.61986	6.26891	6.4213
ASCC3	5.41189	5.77618	5.81868	6.01236	5.74335	4.96172	5.13898	5.33633	5.63562	5.69761	4.93624	5.18106	4.89074	5.13172	5.36686	5.8267	5.7462	5.19371	5.10557	5.22207	4.68122	5.15889	5.6235	5.16849	5.27188	5.27808	5.57584	5.69337	5.78096	4.91603	5.18067	5.50861	5.29443	5.72562	5.6911	5.97353	5.20176	4.81085	5.38502	5.5141	4.14374	5.35444	4.70186	5.2305	4.86277	5.25368	4.92136	4.83168	5.30832
ASCL1	0.825851	1.28772	1.92915	1.56485	1.19504	2.78253	2.64289	1.23427	2.58446	1.28317	2.26914	1.02716	0.958624	0.638994	0.438287	0.487355	1.02604	1.64618	1.82248	1.89669	0.563299	1.22132	0.718971	1.18461	1.33686	0.894165	1.29832	1.2805	1.30933	3.26763	1.36413	1.39188	1.28209	3.97426	1.98705	1.52964	3.36434	1.31197	1.32456	1.33199	1.31512	2.86082	1.36611	1.45358	1.33266	3.12338	1.29832	1.28976	1.29116
ASCL2	3.2256	0.823569	0.941631	0.594392	1.51297	0.622775	2.34092	0.148015	1.03384	0.171148	0.106732	0.0789757	2.26384	0.618956	0.169238	-0.469252	1.04145	1.07611	0.936693	1.65531	2.01636	1.40071	0.729501	0.728691	0.174475	0.230461	1.43559	1.4201	1.44686	1.47856	1.50208	1.52866	1.41765	1.47115	1.43277	1.67495	1.4323	1.44729	1.46172	1.46443	1.44784	1.45313	1.49772	1.58691	1.45884	1.57661	1.43609	1.42615	1.41765
ASCL3	3.50422	3.41388	4.131	4.83734	3.45789	1.25272	1.33631	4.46089	0.91738	1.1155	2.65246	0.713763	4.06232	1.02604	2.49981	2.00751	3.276	2.02645	3.02934	3.18133	2.38842	2.80228	3.66691	3.79078	2.42581	3.28135	4.52353	3.36434	2.52332	3.8536	4.22328	4.24826	3.48752	4.3436	3.44809	4.03689	3.9864	4.61262	0.273696	2.03802	3.38908	2.79215	3.21869	3.52986	3.5776	5.3021	3.27666	0.258088	0.458605
ASF1A	7.01924	7.09064	7.21264	7.35113	7.28701	7.32179	6.73747	7.03151	7.15143	7.39328	7.45344	7.35293	7.12065	7.06405	6.29095	7.26128	6.93781	7.40211	6.9706	6.87602	7.14053	7.09351	7.46728	7.21685	7.25969	7.47856	7.31643	7.51841	7.44467	7.63876	7.30483	7.44579	7.1802	7.16432	7.46453	6.8337	7.67535	7.21099	7.37666	7.30827	6.9129	6.88783	6.59594	7.07491	6.912	6.94309	7.33979	7.31034	6.94221
ASF1B	4.37814	4.39572	2.53131	4.25476	3.97337	1.82939	1.37848	1.78441	2.09466	4.22831	4.04904	4.24871	2.71055	3.26827	4.15873	3.54791	4.1046	3.69592	4.42304	2.93711	3.09817	2.38283	4.66485	2.52214	2.8211	3.7207	3.86127	2.82189	2.72436	3.40384	1.81734	2.53131	3.50124	4.48968	2.39991	3.10293	3.68823	2.42413	3.66302	2.91121	4.1735	3.977	3.37203	3.41222	3.11412	-0.066708	2.92544	3.46061	4.2823
ASGR1	1.41667	0.901351	1.32571	3.85459	1.00949	1.60852	1.64001	4.4366	1.19564	1.47216	1.19304	0.951068	1.85759	3.74849	1.48952	1.33042	0.810735	1.7612	2.10085	1.51138	1.52406	0.145741	1.05243	0.570405	2.32516	1.0678	2.87968	0.849549	3.77573	2.01636	0.923292	0.927268	0.859504	3.77842	1.56914	1.07934	1.98053	2.72715	3.31083	0.877622	3.78687	3.03423	4.89189	3.59608	0.88654	2.84289	1.67092	0.831548	2.65246
ASGR2	3.32768	1.45147	0.781656	1.77359	1.62714	0.518006	3.19456	2.83535	0.946232	1.71586	1.12278	1.21237	0.176375	0.0149782	0.969028	1.71785	1.50874	1.31197	1.49118	1.3678	0.243614	-0.0437051	1.78301	1.29076	0.568939	0.737765	2.94531	1.20105	1.22989	1.26293	1.28502	1.30933	1.20678	1.25564	1.2133	1.44191	1.21704	1.23386	1.24826	1.25367	1.24108	1.23898	1.28266	1.37471	1.25306	1.36242	1.2133	1.20581	1.20977
ASH1L	7.5467	6.75403	7.19266	6.53083	7.32605	7.04425	7.62126	6.72154	7.58143	6.98924	7.30027	6.92356	7.52014	6.70951	6.78051	7.52987	6.95248	6.9906	6.71908	7.25861	7.09699	7.07085	6.95248	6.55908	6.9981	7.0874	6.80544	6.92315	7.35908	6.96824	7.40862	7.22924	7.44988	7.12065	7.13764	7.49648	6.70506	6.59174	7.25175	7.24853	6.71873	7.54383	6.40418	6.38692	6.66447	6.53737	6.56424	6.31243	7.05232
ASH2L	7.24423	7.93877	8.17326	7.47856	8.08607	7.70721	7.90975	7.51233	7.82695	7.90446	8.17139	7.66604	7.92158	7.63876	7.61611	8.1255	7.64762	7.89294	7.45811	7.67251	7.91434	7.59278	8.05413	7.64126	8.02052	7.7364	7.80903	7.93099	7.86313	8.3439	8.15486	8.21429	8.09628	7.8375	8.16593	7.65802	7.91051	7.58667	8.20105	8.01441	7.95356	7.91051	7.2204	7.80832	7.87346	7.02123	7.86313	7.5431	7.72421
ASIP	2.23329	3.32033	4.27001	3.91238	5.22132	3.18372	2.88291	3.44706	3.46338	2.73323	5.22207	6.34727	4.4272	6.40958	3.56651	3.85706	4.22831	4.44292	5.84862	3.81843	5.18681	3.73943	4.31049	3.89794	4.67807	3.88343	4.65983	4.81202	4.98772	3.12867	4.76896	4.5187	5.01506	4.17445	4.33766	4.77225	4.85023	4.78668	2.61293	4.62232	4.00418	4.87845	4.87883	4.51706	4.20184	3.53206	2.61773	3.49461	4.00468
ASL	5.86244	6.13325	5.97168	6.68642	5.95803	5.84726	5.70784	5.72526	5.45761	5.16619	6.12217	6.47854	6.28984	6.19561	6.06068	6.21876	5.91412	6.42233	6.50912	6.08747	6.00976	5.52727	5.53826	6.37361	6.10907	6.08883	5.85281	6.06688	5.75062	5.73241	5.5145	5.95227	5.81931	5.79357	6.03165	5.83872	6.03359	6.14086	4.51368	5.4194	6.37402	6.07658	6.61742	6.52321	6.31824	6.53654	6.34331	6.54545	6.48838
ASMTL	7.04648	7.52737	7.54879	7.63818	6.92747	7.12904	7.282	7.5248	7.57943	7.97051	7.61611	7.85077	7.37503	7.64189	7.57757	7.0546	6.69242	7.20089	6.72154	7.24265	7.44348	7.20247	7.0123	8.33675	7.57144	7.13263	7.32283	7.41766	7.11584	6.7608	6.85093	7.21156	7.16685	7.4958	6.87055	7.06029	7.29534	7.56515	6.44978	6.59344	7.35847	7.20897	7.8849	8.01277	7.67459	7.5444	7.53459	7.63619	7.38698
ASMTL-AS1	1.61606	1.42954	1.99405	2.83873	2.30782	3.73625	0.526119	2.32137	1.75185	3.75301	3.27467	4.1019	1.55218	2.74086	4.31219	2.60661	1.93766	0.94747	1.32211	1.79238	2.26653	2.76568	0.477096	2.99248	4.20926	2.86228	2.59212	1.54304	1.5664	2.51355	1.61894	1.64907	1.5392	4.43796	1.55505	5.77731	3.20629	4.53385	3.96678	2.99248	4.40264	1.56532	6.15182	6.17407	4.8539	5.45315	3.39305	3.54288	1.57267
ASNA1	6.87906	7.23808	7.27476	7.29482	6.96931	6.57615	6.17477	6.80747	7.24586	6.9165	7.28537	7.41586	7.58857	7.26674	7.31966	6.71457	6.91775	6.50206	7.63421	7.23247	7.63364	6.99384	6.44912	7.48381	7.19746	6.9999	7.11718	7.64956	7.23507	7.56634	7.0883	7.61254	7.07788	7.35393	7.85077	7.16138	7.31589	7.09699	7.32446	7.20354	7.68609	6.95294	7.68233	7.7912	7.45344	7.74063	7.3463	7.60003	7.74665
ASNS	5.41301	4.99551	5.3843	5.63782	4.35149	4.48931	4.5512	4.18769	6.03231	6.35326	4.94302	4.89151	4.86681	4.70978	5.3746	5.31062	5.16808	4.79751	6.66839	4.51988	5.94603	5.9013	4.41002	4.92092	5.1105	4.74949	6.05197	4.7605	5.80167	4.2863	5.1751	4.21617	4.87914	3.74294	6.31792	5.63669	5.35176	4.34729	4.11417	4.52949	4.59007	4.36614	6.21264	5.37905	5.24517	5.69693	4.27356	5.14291	4.81718
ASNSD1	8.14174	8.3483	8.13396	8.4335	8.26979	8.73234	8.11353	8.2613	8.15234	8.36199	8.20638	8.52909	8.09885	8.07661	8.36199	8.44835	8.12075	8.51791	8.69506	8.38963	7.94676	8.3844	8.22851	8.00386	8.00003	8.47159	8.37164	8.44223	8.21083	8.48688	8.55333	8.38244	8.14533	7.96814	8.56173	8.0136	8.3483	8.20253	8.15756	8.25058	8.55568	8.44835	8.07256	7.76411	8.39814	8.36601	8.6115	8.51322	8.43218
ASPA	5.94679	5.12123	2.35867	2.43412	5.4926	4.78433	4.96126	4.37421	4.61182	3.22616	5.28253	4.70352	3.16776	3.67235	5.49523	4.48376	4.75642	4.78433	3.63702	5.1536	5.16347	4.54515	4.61714	4.506	4.26541	5.69137	4.30144	4.84909	3.39471	4.62072	2.69896	4.00038	4.71182	4.17665	3.43104	4.69924	5.09153	4.12322	5.55897	4.6538	4.18547	4.9835	4.52991	3.2293	4.82045	4.20549	5.73502	4.92468	4.43285
ASPDH	1.97446	-0.256025	2.54871	4.37516	1.20171	1.90206	4.39782	4.59526	3.44652	3.53149	2.23987	4.48741	3.78886	1.13748	3.96253	3.99899	2.13078	4.6355	3.32768	4.99709	3.08499	1.36989	2.10995	3.52099	2.87129	2.09249	4.07182	3.49754	2.42836	5.84937	5.44789	5.65165	2.45157	4.21313	5.01101	6.40846	4.89987	3.01049	4.68685	2.53481	3.5744	3.77429	4.49756	5.39391	3.24974	5.00941	1.01809	1.00433	1.02604
ASPG	1.09008	1.11388	3.14385	1.35236	1.84958	1.64552	1.66008	1.54304	0.260527	1.81285	0.710896	0.932288	1.76371	0.977435	1.41111	0.195824	1.18461	1.76435	2.58654	1.45572	3.10225	1.14498	0.0578381	0.792337	1.13999	1.30222	1.92125	1.9126	1.94323	1.99514	1.99171	2.03919	1.90029	1.97116	1.9126	2.32774	1.93766	1.93103	1.94323	1.94968	1.94624	1.9126	1.98386	2.1271	1.93674	2.1271	1.91454	1.91347	1.88787
ASPH	6.86146	6.96161	6.92315	7.22501	7.21208	7.39897	7.09838	7.0527	6.87385	7.3098	7.19791	7.26792	6.90177	6.86787	7.52677	6.89215	6.71908	7.09647	7.03245	7.29706	7.2276	7.33636	7.58962	7.18537	7.13317	7.35581	7.27115	7.3463	7.25917	7.45811	7.24076	6.89086	6.81746	7.17266	7.1594	6.99014	7.42631	7.11539	7.18582	7.17638	7.02951	6.96301	6.6637	6.6445	6.77083	6.85219	6.64571	6.97023	6.87015
ASPHD1	3.65817	0.965023	1.00567	0.988619	4.13507	1.10272	3.36494	3.41732	4.03924	3.82873	4.36795	0.247025	3.63648	1.17073	2.90718	1.97446	0.9956	1.34654	3.40998	3.5897	3.68722	1.35802	1.52709	3.53817	5.23975	2.87196	3.61325	4.84334	0.625505	0.615433	2.66396	0.669999	0.617817	0.643724	0.577138	3.07182	0.615433	3.95558	0.642616	0.642616	3.13295	4.23795	0.705151	0.748851	3.99533	4.09915	4.94099	2.84211	3.31347
ASPHD2	1.78301	3.15871	3.63145	3.3521	3.62546	3.41793	4.31532	2.43412	3.73258	3.99533	3.70544	2.88548	3.18894	3.25936	4.35511	2.14936	4.19003	2.22849	3.49587	4.72859	1.55439	1.79107	3.25805	1.99618	3.2491	3.30568	3.20873	2.82953	4.06963	3.45965	2.85458	2.69213	3.33673	1.79576	3.45965	5.04544	4.08738	2.69511	3.05763	3.69301	2.70846	3.00917	4.04162	3.25396	3.11138	2.85115	2.69022	0.325833	2.9765
ASPM	2.98288	3.26511	1.45774	1.90443	3.0397	2.68016	3.35684	2.60062	3.05217	1.27073	2.80745	3.92591	2.85358	2.55657	3.11945	2.78171	4.17846	1.75115	1.66559	1.70085	1.66807	2.87035	3.65995	1.74504	1.66807	2.68203	2.22849	1.14059	3.23477	2.42581	3.78778	4.09518	2.92833	3.21134	2.45905	4.24443	2.13314	2.66679	3.2466	2.88793	2.32418	2.8066	3.16009	4.19003	2.64699	3.31291	2.23592	2.50465	0.798876
ASPN	9.88286	9.1645	8.55229	9.16026	8.09366	7.0546	7.4612	8.77222	8.71377	8.78542	7.9971	8.88074	9.25974	8.91254	8.82853	8.96414	8.92685	8.19029	7.33213	9.35465	6.85758	8.54552	8.91254	8.30162	8.60095	6.50675	7.93963	7.86161	8.05322	7.29482	7.78485	9.01808	8.45667	7.72285	7.95278	7.92876	9.12396	9.32808	8.69084	9.45265	8.56777	7.88991	7.53991	8.92062	8.22654	8.70601	7.1823	7.61744	9.53106
ASPRV1	4.77427	4.87883	4.92222	4.63252	3.84789	4.95326	4.37776	5.03977	5.00496	5.21946	4.70402	5.41153	4.38585	5.33139	4.2783	4.69681	4.56029	5.08729	4.01824	5.17764	4.86235	4.76817	3.69434	4.78476	5.14718	4.38276	4.5256	4.62232	4.31745	3.75149	4.03169	5.05243	4.72102	3.87325	4.65983	4.41297	3.44101	4.37282	3.43614	4.14374	4.62995	4.80185	3.26572	3.62333	4.32766	3.30675	4.63802	4.23045	4.98305
ASPSCR1	2.70727	4.02706	4.22958	4.66652	3.66249	4.6769	3.70001	4.36399	1.13009	4.49172	3.50241	4.94809	3.25503	5.10136	3.65951	2.87352	2.43549	3.9052	3.86034	4.05277	5.25035	3.88109	2.89946	3.9052	3.55278	3.73163	5.26254	4.94994	1.67615	1.70985	1.72425	1.76191	1.65186	1.70208	5.34728	4.24032	3.5269	4.04251	1.69025	1.6879	3.70454	5.70961	5.28299	5.067	5.87424	4.0586	1.66288	5.25035	5.9693
ASRGL1	3.54232	3.49461	3.96733	3.31836	3.57004	2.7639	4.29398	2.0462	2.05434	3.40765	0.736804	3.3373	3.30073	2.38842	3.818	2.85276	4.67018	3.30318	4.44067	3.0397	4.38797	3.97792	2.78768	3.89287	3.98594	4.42841	2.93711	5.20988	5.25446	5.32958	4.28673	1.36413	3.80353	1.3162	1.27274	1.50046	5.29474	1.28614	4.43324	5.98959	5.71907	5.01348	4.31049	1.42954	3.86796	1.41495	6.08348	1.26513	5.03096
ASS1	7.55572	7.60145	7.29234	7.50981	7.3703	7.4251	6.54967	7.55104	6.83572	7.26299	7.07085	7.40499	8.20023	8.28309	7.25333	6.9129	8.5423	7.77218	7.69129	8.36115	7.37563	7.66138	7.02329	7.40738	7.26792	7.68079	7.821	8.03697	7.31193	7.86161	7.15332	7.64895	7.5261	7.61254	8.31302	7.61548	8.23994	7.89445	8.32691	7.59942	8.00966	7.89944	8.33471	8.40209	8.57332	8.07917	8.85554	8.45981	8.36009
ASTE1	5.63342	5.31309	5.5527	5.32517	5.36686	4.4076	5.56422	5.30006	5.18962	4.90296	5.41552	4.73059	5.56064	4.8559	5.63813	5.42297	5.07996	4.95952	5.2026	5.14329	5.5079	5.18106	5.06417	5.4194	4.7269	5.70121	5.27225	5.12615	5.30049	4.85464	5.33389	4.7605	5.11965	5.21697	5.47537	4.66142	5.00062	5.46457	5.5049	5.00302	5.09748	5.3735	5.84652	5.21387	5.06658	4.64065	5.2467	5.43443	5.10557
ASTN1	4.21662	4.06676	4.18166	0.1914	3.87473	2.35074	2.9669	2.95973	3.86569	3.77067	3.83121	3.98467	1.09174	1.57661	3.276	2.13442	1.77072	3.16962	1.08851	1.46063	3.92831	3.62166	1.74442	3.13645	2.44907	2.43704	0.986115	2.59642	4.77016	4.37695	3.55336	1.05413	3.13147	1.02115	4.3805	2.77168	3.2256	3.08567	1.94727	3.07866	3.60341	4.46305	1.06064	1.12666	1.01014	3.04791	1.53804	3.17532	4.61024
ASTN2	4.47878	4.41459	3.88535	3.41607	3.76253	4.3469	3.74197	4.15031	4.39742	4.57359	4.96172	5.34132	4.30541	4.82803	4.5563	4.0421	4.17609	4.35327	4.15222	3.99533	4.15873	4.76405	4.0344	3.87915	4.31006	4.26091	4.12322	4.39321	4.17533	4.5256	4.10054	4.03071	3.66884	4.29318	4.26541	3.71135	3.86381	3.78735	3.93633	3.60703	4.01569	4.17758	3.79794	3.90766	4.49637	4.33305	4.77265	4.568	3.87872
ASXL1	5.6044	5.34806	5.60647	5.05283	5.67556	5.1994	5.42231	5.39501	5.57732	5.48613	5.47242	5.42047	5.7053	5.00865	5.86406	5.45117	5.44256	5.45761	5.47461	5.59229	5.60677	5.72596	5.25283	5.38362	5.21206	5.46234	5.15248	5.33478	5.3746	5.36654	5.63142	5.39093	5.51123	5.48578	5.55623	5.2641	5.39826	5.40534	5.42353	5.39865	5.9133	5.72125	5.10644	5.43484	5.62224	5.33561	5.70053	5.41189	5.56593
ASXL2	5.62535	5.34364	5.78491	5.23933	5.70602	5.44633	6.04034	5.4068	5.62675	5.82071	5.67556	5.6766	5.84307	5.69577	5.45461	6.00349	5.64164	5.73461	5.69941	5.56064	5.73532	5.40459	5.4926	5.60882	5.42516	5.38468	5.58145	5.56452	5.95727	5.76385	6.02074	5.55112	5.62844	5.66673	5.42934	5.75795	5.43593	5.22098	5.58721	5.7462	5.18681	5.4788	5.73211	5.60099	4.97779	5.81235	5.4788	5.19193	5.2106
ASXL3	2.96615	2.40564	1.13531	1.56197	3.12078	3.17388	2.87968	3.04177	3.95828	3.76549	3.76957	3.28915	2.30621	1.57434	3.17664	3.32966	2.88386	4.46359	1.74504	3.17137	2.45157	4.1991	2.87035	1.83445	1.89018	3.82918	3.06229	2.98945	3.89751	1.1385	4.30328	5.40571	2.78842	2.9998	1.09618	4.54515	1.10396	3.53603	2.48033	3.57546	1.12344	4.27524	3.52492	1.24503	3.32226	3.14385	3.17721	3.59706	2.96907
ASZ1	0.211807	1.429	0.0149782	1.29565	0.178692	3.16776	0.339036	0.052835	0.168474	3.55401	0.815696	0.481487	2.96037	1.34361	0.907829	0.780154	0.831548	0.294409	0.780779	0.948671	3.04412	0.524415	0.814882	0.264489	1.04659	1.22757	3.12207	0.563299	1.31247	0.59327	2.49593	0.644726	0.594392	0.611275	2.62254	0.798021	2.0414	2.62881	2.82035	0.609989	0.603373	1.7401	0.68469	2.4732	0.612624	0.735912	0.581508	2.91036	0.594392
ATAD1	8.21429	8.84957	8.44949	8.56417	8.87338	8.92212	8.99139	8.63392	8.48337	8.91734	9.06105	9.11278	8.8452	8.85819	8.67359	8.70998	8.21351	8.74552	8.46487	9.17017	9.02314	9.22238	9.07833	8.92062	8.53129	8.94836	8.67359	9.32998	9.1348	9.10401	9.01636	9.3389	8.76815	8.70458	9.07307	8.7795	8.87627	8.4396	9.02454	8.95344	8.79381	8.38244	8.51672	8.72039	8.78217	8.90134	8.68157	8.85819	8.73384
ATAD2	6.18853	6.59722	5.98527	6.24283	6.36371	6.09735	6.05031	6.09298	5.86584	5.91158	6.78966	6.75858	6.02455	5.87927	6.36302	6.38457	5.52841	6.2591	5.13131	6.02489	5.81513	5.50451	6.30098	5.5233	6.01791	5.72125	5.94922	6.2449	6.22641	6.37248	6.376	6.22421	5.98208	6.1445	6.10981	5.50041	6.19599	5.83405	6.28801	6.46882	5.26985	5.9013	5.0042	5.25368	5.79517	5.74479	5.42297	5.52624	5.1755
ATAD2B	4.50723	3.69908	4.16914	3.34256	4.03689	4.47368	4.99504	3.40833	4.40305	4.12594	4.50765	3.36036	4.72411	3.91602	5.36472	4.93747	4.49211	3.8223	3.25089	3.79388	4.04682	5.02278	4.27573	4.39782	3.3085	4.31397	3.2796	4.02182	4.50046	3.97472	3.42468	2.87642	3.99617	4.0107	4.29913	0.982009	4.70149	3.09549	3.92634	3.96201	3.41107	4.36399	4.46305	3.03643	3.97291	3.13216	3.98232	2.29306	4.2645
ATAD3A	3.87717	5.54844	6.10835	5.62466	5.98061	6.35933	4.24443	6.1856	4.31798	6.4649	4.94476	6.05637	3.3731	5.75558	6.215	4.15303	4.36143	5.50827	5.51767	6.13441	6.17444	5.19902	4.17305	5.99931	5.36366	4.69026	5.68305	5.42626	5.10397	5.31636	4.79193	5.20565	5.48649	5.62909	5.62808	5.68594	5.78197	5.2091	4.82045	4.814	5.65377	5.16313	5.81727	5.64641	5.85744	5.80309	5.70192	6.04613	5.68594
ATAD3C	0.560386	0.245495	1.33631	1.61305	0.907829	1.52964	1.95358	2.89555	3.06441	0.756787	2.00418	1.13411	3.58049	2.28666	2.73125	1.81889	1.06127	1.93875	2.14936	1.20639	1.62652	1.93405	0.950423	2.3856	1.5306	1.20171	1.77743	1.78243	1.79652	1.82939	1.84532	1.88613	1.75523	1.82624	4.25745	2.15817	1.78582	1.78849	1.79789	1.80066	4.8873	4.1704	1.82859	1.97116	4.18718	1.9692	4.02229	1.77411	1.75262
ATAD5	4.09746	3.85803	3.4144	4.01723	3.41676	4.15168	3.4789	3.5376	4.65422	2.19433	4.46899	4.07846	4.12552	-0.0598817	3.11875	3.67187	4.43056	2.89638	1.6327	3.13645	2.97143	3.21007	3.36853	3.9929	2.16641	2.82035	3.8378	0.580147	4.77755	4.59752	3.85559	3.47267	3.50178	3.39016	2.97219	4.5698	4.21009	4.12224	4.14029	2.83031	3.49407	2.77919	2.14816	3.57167	2.75094	4.12322	0.598204	0.570405	0.60871
ATAT1	3.7269	4.57999	4.18413	3.80263	4.10652	4.35645	3.9531	3.89333	4.27356	3.78778	4.33591	4.44384	3.71492	4.23484	3.97949	3.93297	4.62706	4.66525	4.01615	3.68094	3.68549	4.32728	4.22692	3.43506	3.59447	4.14754	4.45912	3.19697	3.73426	3.00783	3.44918	4.17485	4.21662	3.45911	3.18751	3.64214	3.88109	3.98329	3.38725	4.07746	4.48142	4.15222	5.28454	5.10986	4.88297	4.19097	4.34181	4.11821	4.91521
ATCAY	1.69909	4.29318	2.24638	1.37526	0.468653	1.26144	0.44475	-0.31048	-0.0866163	2.87196	2.31876	3.59229	-0.197427	4.77134	3.1406	1.66058	1.49989	3.11212	1.28111	1.43464	1.47745	0.753374	2.18263	1.51417	1.49327	2.96263	1.27321	1.2577	1.2856	1.31409	1.3358	1.36152	1.25869	1.31355	1.27073	3.03572	1.27073	1.28459	1.2972	5.25776	1.29076	3.33852	1.33798	1.4271	6.60187	1.41303	4.9414	1.26347	1.26621
ATE1	5.93539	6.96205	6.90976	7.03717	6.70049	7.00086	6.58082	6.26169	6.68642	7.15428	7.05315	7.8849	6.69286	6.83535	6.22421	6.91017	6.03124	6.5036	6.23643	6.81141	6.57969	6.48373	7.44291	6.25667	6.97453	7.00999	6.86022	7.06759	7.1353	7.09699	7.65748	7.1844	6.65773	6.65688	7.15332	6.21623	7.01139	6.13633	7.52929	7.53349	6.57378	6.4289	5.80792	5.80694	6.0784	6.31679	6.87809	6.87336	6.83499
ATF1	6.63822	6.86198	6.19847	7.05232	6.47891	7.00589	6.36847	7.14614	6.16517	6.52117	6.44944	6.32704	6.31937	6.38891	6.54309	7.32179	6.40657	6.77751	6.80622	6.5394	6.43533	6.42088	7.03515	6.40735	6.831	7.00763	6.9981	7.24018	7.29765	7.2982	7.45232	6.68428	7.06564	6.75275	7.04327	6.6504	7.16685	6.82969	7.39849	6.971	6.81359	6.46668	5.98419	6.10765	6.47328	6.45807	6.16929	6.37679	6.60766
[truncated: 15,159 more rows]
[truncated: 34 more columns]
