# Supplementary material for: Multiple effect mechanisms of FLNC in dilated cardiomyopathy based on genetic variants, transcriptomics, and immune infiltration analysis
Source: Research Square preprint supplement (doi:10.21203/rs.3.rs-2795537/v1), 2023-04-12
Supplement: Supplementary file 7 [file f16489e9a09d8db70aaf94b7.xlsx]

## Sheet: Sheet1
GSE3586
geneNames	GSM82393	GSM82394	GSM82395	GSM82396	GSM82397	GSM82398	GSM82399	GSM82400	GSM82401	GSM82402	GSM82403	GSM82404	GSM82405	GSM82406	GSM82407	GSM82408	GSM82409	GSM82410	GSM82411	GSM82412	GSM82413	GSM82414	GSM82415	GSM82416	GSM82417	GSM82418	GSM82419	GSM82420
A1BG	-0.660192	-0.497986	-0.535907	-0.36253	-0.489822	-0.525549	-0.407178	-0.345268	-0.540515	-0.46853	-0.52422	-0.440595	-0.350994	-0.391201	-0.399495	-0.528953	-0.359529	-0.354157	-0.58339	-0.547995	-0.651004	-0.467725	-0.398676	-0.285615	-0.556592	-0.425528	-0.259524	-0.61479
A1CF	-1.2087	-0.98687	-0.747326	-1.19386	-1.2046	-1.24085	-1.12662	-1.27509	-1.16602	-0.577116	-0.818955	-0.798286	-0.536325	-0.948906	-0.778194	-0.801545	-0.871203	-0.874295	-0.846352	-0.870621	-0.904663	-0.852063	-0.692701	-0.81901	-1.00838	-0.331018	-0.520163	-0.769083
A2M	0.249068	0.248531	0.322076	0.362758	0.383967	0.442978	0.283085	0.482038	0.475088	0.474386	0.358308	0.358813	0.442018	0.671674	0.538015	0.291685	0.546193	0.23856	0.312005	0.199068	0.679278	0.208691	0.0748556	0.281634	0.21889	0.243377	0.0862965	0.459711
AAAS	0.170837	-0.344712	-0.15347	-0.175581	-0.395107	-0.175411	-0.496011	-0.114031	0.184376	0.222866	-0.0379373	0.0185122	0.107508	0.0459629	0.00381536	-0.0803806	0.215793	0.181275	0.117089	-0.0547199	0.126517	0.0744023	-0.278123	-0.146601	0.109789	0.145546	0.278257	0.283475
AACS	0.998617	0.901803	0.934949	1.21987	1.26533	1.22846	1.15377	1.09155	1.03185	0.82538	1.22021	1.16032	1.07973	1.3332	1.08651	1.1291	1.11896	0.927898	0.981146	1.10035	1.11634	1.11682	1.06166	1.40551	0.973857	1.00891	0.745025	0.702778
AADAC	-0.233688	-0.317686	-0.45212	-0.328494	-0.354581	-0.215572	-0.205793	-0.194838	-0.406087	-0.330208	-0.259225	-0.407702	-0.361141	-0.55769	-0.289101	-0.303116	-0.353236	-0.312291	-0.46376	-0.308118	-0.370091	-0.100006	-0.34413	-0.30927	-0.210263	-0.115539	0.0865164	-0.27945
AADACL2	0.54704	0.138392	0.509311	0.391936	0.215352	0.375657	0.178895	0.355059	0.465754	0.249134	0.268662	0.331005	0.267703	0.340501	0.161546	0.267414	0.499918	0.159135	0.0954384	0.185598	0.0601455	0.17339	0.346892	0.498398	0.182148	0.194074	0.207269	0.344472
AADACL4	0.229623	0.169661	0.306788	0.116081	0.369989	0.206307	0.244543	0.0847655	0.239691	0.132426	0.316477	0.165458	0.195517	0.0984452	0.109538	0.000320881	0.164464	0.126925	0.129759	0.172506	0.0522633	0.0496	0.129043	0.0860995	-0.0305675	0.0682163	0.034219	0.086588
AADAT	-0.133795	0.212801	0.060519	-0.0951425	0.141577	-0.0959781	0.0152326	0.132282	-0.539593	-0.301619	-0.101678	0.00340256	-0.231267	-0.193087	-0.186531	0.166265	0.00909623	-0.0814863	-0.0196429	0.0066205	-0.0311978	-0.0895282	-0.115447	-0.0638025	-0.108542	-0.0989308	-0.248641	-0.0220214
AAED1	-0.0370277	0.0440687	0.345724	0.185017	0.0799973	0.108318	0.118259	0.242062	-0.020519	0.0908098	0.0317714	-0.0245881	-0.0330489	0.0278667	0.0883813	0.0767729	0.119982	-0.16168	-0.0102829	-0.00225346	0.0459069	-0.031377	0.0134072	0.0445417	0.0443984	-0.0584987	-0.0935854	0.12565
AAGAB	-0.412162	-0.21969	-0.306648	-0.184511	-0.289198	-0.522824	-0.302841	-0.385684	-0.251494	-0.336445	-0.175642	-0.373411	-0.242624	-0.529969	-0.320469	-0.309885	-0.432787	-0.1258	-0.157419	-0.473108	-0.360012	-0.320003	-0.379408	-0.682485	-0.353821	-0.249496	-0.710008	-0.489829
AAK1	0.152491	0.276793	0.335681	0.327063	0.319933	0.24236	0.317927	0.221176	0.241526	0.25329	0.227402	0.203016	0.310134	0.275363	0.187253	0.157896	0.229122	0.104727	0.169019	0.22025	0.189918	0.172795	0.232886	0.145181	0.18181	0.0471354	0.0269613	0.0521597
AAMDC	0.735495	0.778174	0.785407	0.55203	0.643747	0.709532	0.628596	0.605726	0.873941	0.542137	0.922887	0.806678	0.717002	0.868884	0.590769	0.556859	0.578285	0.421261	0.470896	0.769788	0.589642	0.599074	0.559046	0.858231	0.457281	0.413323	0.648809	0.428997
AAMP	-0.399588	0.0555654	-0.0728493	-0.375967	-0.20584	-0.333391	-0.141747	-0.0471868	-0.200015	-0.0294414	-0.0757655	-0.025322	0.0241051	-0.264351	-0.18133	-0.208659	0.0270879	-0.316014	-0.0651491	-0.0804007	-0.106301	-0.0203399	-0.0729752	-0.0119755	-0.0476183	-0.0436657	0.0394833	0.232472
AANAT	0.252025	0.376156	0.274969	0.33444	0.372066	0.319207	0.237215	0.10619	0.376345	0.265607	0.163874	0.331035	0.353297	0.362751	0.296936	0.248192	0.244646	0.139187	0.212961	0.262104	0.305558	0.258505	0.336279	0.488515	0.13023	0.290622	0.324557	0.31559
AAR2	-0.422641	-0.529106	-0.625265	-0.530414	-0.251395	-0.219583	-0.479839	-0.40061	-0.390817	-0.492645	-0.540658	-0.430341	-0.561976	-0.374951	-0.187907	-0.365886	-0.268052	-0.10528	-0.338167	-0.258445	-0.218761	-0.0536484	-0.40071	-0.118003	-0.258648	-0.216898	-0.167257	-0.388817
AARD	0.330003	0.302074	0.0560419	0.118456	0.0635833	0.338494	0.338969	-0.00567621	0.208236	0.269801	0.318378	0.296434	0.158988	0.38875	0.295758	0.192529	0.172618	0.129255	0.0822527	0.0151496	0.21196	0.150632	0.426179	0.133731	-0.0188186	0.354317	0.179416	0.282166
AARS	-1.32339	-1.24402	-1.05437	-1.34313	-1.6554	-1.50931	-1.16296	-1.41271	-1.1676	-1.13422	-1.29852	-1.17695	-0.82912	-1.44959	-1.09979	-1.4056	-0.958212	-1.15967	-1.20554	-1.28982	-1.36906	-1.17727	-1.28753	-1.47662	-1.23359	-1.10701	-1.40006	-1.11601
AARS2	-0.42945	-0.461986	-0.283474	-0.40035	-0.386527	-0.400343	-0.376352	-0.332883	-0.25865	-0.394295	-0.500741	-0.509902	-0.408054	-0.186539	-0.280338	-0.37729	-0.483662	-0.511188	-0.379044	-0.339892	-0.498676	-0.39605	-0.344438	-0.367721	-0.330779	-0.388337	-0.365243	-0.538369
AASDH	-0.184577	-0.0995439	-0.0271157	-0.152324	-0.0859763	-0.355583	-0.188626	-0.0371784	-0.273448	-0.339618	-0.250482	-0.152652	-0.143081	-0.426902	-0.270635	-0.246268	-0.138918	-0.249886	-0.228665	-0.342823	-0.0752329	-0.25351	-0.241429	-0.203881	-0.0492776	-0.118054	-0.0367593	-0.137022
AASDHPPT	-0.472596	-0.220383	-0.190319	-0.325356	-0.391279	-0.391646	-0.139854	-0.180852	-0.388987	-0.346974	-0.288595	-0.267698	-0.403314	-0.434228	-0.237015	-0.604815	-0.413016	-0.265065	-0.205547	-0.259776	-0.244081	-0.375041	-0.17925	-0.397414	-0.231783	-0.312977	-0.26752	-0.156423
AASS	-1.09905	-0.997917	-0.937115	-0.945459	-0.967565	-1.04264	-0.816139	-0.732774	-0.993426	-0.826445	-1.01037	-0.811237	-0.878843	-0.719839	-0.767147	-1.05378	-0.912968	-1.06423	-1.09911	-1.09083	-1.02549	-0.833241	-0.975488	-1.19035	-0.845636	-1.00251	-0.987522	-0.897491
AATF	-0.528634	-0.333361	-0.350604	-0.407851	-0.40206	-0.417054	-0.222768	-0.540187	-0.495921	-0.380582	-0.385115	-0.497976	-0.229568	-0.379292	-0.264194	-0.237662	-0.305198	-0.294159	-0.158997	-0.377854	-0.273312	-0.329694	-0.215983	-0.264106	-0.128286	-0.244774	-0.217425	-0.204281
ABAT	-0.32899	-0.428554	-0.425642	-0.384312	-0.0999754	-0.0345581	-0.293648	-0.0579176	-0.151138	-0.579782	-0.313375	-0.16698	-0.238665	-0.0891295	-0.110208	-0.193889	0.0633429	0.155876	-0.0898563	0.0443672	-0.0729579	-0.0200502	-0.009369	0.337045	0.0257723	0.0441746	-0.204888	0.492312
ABCA1	0.467428	0.378463	0.358063	0.325927	0.069034	0.348698	0.389602	0.314388	0.310763	0.618281	0.383814	0.646883	0.435291	0.670095	0.569069	0.537513	0.438586	0.784385	0.716926	0.546439	0.561958	0.705484	0.503439	0.612766	0.591627	0.403756	0.661986	0.514941
ABCA10	-0.400615	-0.346706	-0.354706	-0.384096	-0.321632	-0.318975	-0.427726	-0.194117	-0.572903	-0.125479	-0.412857	-0.13792	-0.241304	-0.169129	-0.175942	-0.267071	-0.211266	-0.221083	-0.366717	-0.191281	-0.200547	-0.0755606	-0.339029	-0.154662	-0.183463	-0.120222	-0.145926	-0.0561739
ABCA12	-0.0944475	-0.183861	0.108941	0.136822	0.030441	-0.1989	-0.161576	-0.00468285	-0.257209	-0.120102	-0.16782	-0.142969	-0.081744	-0.191023	-0.30564	-0.242046	-0.351891	-0.323843	-0.319116	-0.265865	-0.276047	-0.256009	-0.414429	-0.358288	-0.206901	-0.409315	-0.319378	-0.214472
ABCA2	-0.241582	-0.0776953	-0.199055	-0.109511	-0.115092	-0.239664	-0.16536	-0.217856	-0.345343	-0.143872	-0.38971	-0.224608	-0.363698	-0.163731	-0.246081	-0.230773	-0.415412	-0.13706	-0.167797	-0.100868	-0.345762	-0.292668	-0.333369	-0.510644	-0.257331	-0.220708	-0.253798	-0.329804
ABCA3	0.287179	0.0143494	0.139724	0.119272	-0.178699	0.0653743	0.0163915	-0.0561907	0.0246986	0.108043	0.00970204	-0.0241115	0.056069	-0.00421468	0.132532	0.100187	0.188544	0.198141	0.131331	0.182361	0.0931878	0.160476	0.0178219	0.0729788	0.0960494	0.139041	0.159498	0.156568
ABCA4	-0.573523	0.205409	-0.0337243	0.176659	-0.591906	-0.996904	-0.303869	-0.779672	-0.358713	-0.374366	-0.691492	-0.529863	-0.0526395	-0.380862	-0.687457	-0.224229	-0.329785	-0.689358	-0.490573	-0.395994	-0.393642	-0.439755	-0.978723	-0.00687742	-0.522271	-0.158011	0.0502697	-0.0748924
ABCA5	-0.545227	-0.437777	-0.404724	-0.283427	-0.672111	-0.524136	-0.511815	-0.458619	-0.435318	-0.215354	-0.244683	-0.252037	-0.427484	-0.0252931	-0.246071	-0.13414	-0.357893	-0.0368662	0.165471	-0.235531	-0.239917	-0.107933	-0.130458	-0.259988	-0.271361	-0.130718	-0.0150821	-0.145597
ABCA6	0.402047	0.0882642	0.0802699	0.142817	0.210528	0.177434	0.31615	0.0925546	0.0989214	0.0646171	-0.183589	0.0506806	-0.0397403	0.098101	0.101651	0.0922057	0.00700094	0.0929486	0.19026	0.15057	0.113175	0.0925538	0.0812891	0.252335	0.0881942	0.113242	0.145664	0.245228
ABCA7	0.10641	-0.247331	-0.200478	-0.0483492	0.252856	-0.0225217	-0.0375722	-0.0418527	-0.024851	-0.079971	-0.17664	-0.130794	-0.218735	-0.353613	-0.0709475	-0.0349883	-0.244977	-0.202694	-0.202027	-0.0781928	-0.0630716	-0.0184767	-0.125493	-0.134171	-0.0584436	-0.0190596	-0.264161	-0.18458
ABCA8	0.497378	0.672064	0.534285	0.784826	0.508002	0.56641	0.435694	0.479038	0.742936	0.439022	0.521069	0.432203	0.330984	0.39751	-0.0631258	0.261386	0.125057	0.091403	0.249583	0.193787	0.336021	0.393197	0.333562	0.0539147	0.108036	0.254812	0.198977	0.420469
ABCA9	0.153407	0.054218	0.10838	0.076347	0.0789562	0.039617	0.0155564	0.0669672	0.0285224	0.021662	-0.0520738	0.0820844	0.0185188	-0.079628	0.0168059	0.0558456	0.0347202	0.0120348	-0.0463091	0.0211345	0.223255	0.0975001	0.0780933	0.250123	0.172731	0.0922093	0.129094	0.0383389
ABCB1	-0.303271	-0.098453	-0.164256	-0.179539	-0.103708	-0.361397	-0.177225	-0.0419442	-0.374024	-0.295427	-0.257	-0.327259	-0.261334	-0.287588	-0.0774737	-0.270062	-0.224063	-0.348012	-0.212437	-0.118627	-0.485972	-0.0583538	-0.352836	-0.346054	-0.225034	-0.0371157	-0.187227	-0.184707
ABCB10	0.0759939	0.160366	0.0312623	-0.0517784	0.0298105	-0.170115	0.157423	-0.0133677	-0.105206	-0.110974	0.00672892	-0.0552632	-0.0569801	-0.248909	0.0259072	-0.259537	-0.0440031	0.0674798	-0.094426	-0.23878	-0.067904	-0.0958575	-0.0876004	0.246146	-0.0574827	-0.089452	-0.0484789	-0.0435605
ABCB11	-0.752009	-0.729997	-0.378029	-0.619692	-0.532483	-0.561903	-0.41666	-0.342053	-0.819812	-0.656603	-0.696685	-0.685786	-0.563314	-0.386721	-0.204455	-0.484986	-0.606595	-0.646169	-0.63659	-0.90079	-0.473715	-0.461392	-0.516273	-0.711772	-0.564664	-0.553385	-0.47806	-0.547733
ABCB4	0.0813825	-0.0161283	-0.0914378	-0.215406	-0.0761767	-0.0132569	0.150291	0.0497537	0.0383775	-0.00360528	0.287595	0.0756594	0.174982	0.287092	0.366804	0.398492	0.0502079	0.114458	0.169513	0.178018	-0.00573662	0.177035	0.139224	0.292085	0.187849	0.0499134	0.116711	0.289015
ABCB6	-0.0619716	-0.164879	-0.191992	0.15568	-0.105136	-0.0775417	-0.19242	-0.140927	-0.0717357	-0.0784834	-0.220735	-0.25259	-0.0943564	-0.448882	-0.222589	-0.565799	-0.207337	-0.288531	-0.33383	-0.526386	-0.216271	-0.00948777	-0.0910672	-0.0418063	-0.18541	-0.0397781	-0.103069	0.0728964
ABCB7	0.161335	0.0966884	0.250678	0.0415836	0.21711	0.405265	0.270121	0.35544	0.170249	0.0501294	0.11138	0.0364248	0.104421	0.14052	-0.146681	0.189706	0.0545306	0.0577231	0.191857	0.0942109	0.153958	0.156388	0.168901	0.296778	-0.0805075	0.00821967	0.132131	0.230394
ABCB8	0.161227	0.317433	0.311421	0.0693834	0.202013	-0.0098054	0.692394	0.0696172	0.0846425	0.0840521	0.136742	0.187827	0.052983	0.144213	-0.0236969	0.113702	0.117959	0.105176	0.072867	0.113047	0.113959	0.195537	0.411953	0.0292627	0.281928	0.381517	0.2624	0.0913789
ABCB9	-0.383774	-0.217633	-0.0710038	-0.341518	-0.401885	-0.586627	-0.752838	-0.320222	-0.450592	-0.557773	-0.619802	-0.944365	-0.643805	-0.551115	-0.309727	-0.695212	-0.158409	-0.1648	-0.0430906	-0.52343	-0.63721	-0.424399	-0.192577	0.230223	0.0836319	-0.23626	-0.346946	-0.604237
ABCC1	-0.230558	-0.291075	-0.2637	-0.174632	-0.0195087	-0.331008	-0.280909	-0.126539	-0.449364	-0.200934	-0.576851	-0.343089	-0.42751	-0.214178	-0.568206	-0.499353	-0.492752	-0.606529	-0.48408	-0.5466	-0.39165	-0.327138	-0.329819	-0.570827	-0.359318	-0.561877	-0.42824	-0.420313
ABCC10	-0.687534	-0.708883	-0.664623	-1.14715	-0.397139	-0.656208	-0.783223	-0.626103	-0.780362	-0.483654	-0.516796	-0.663147	-0.679057	-0.610957	-0.559687	-0.278549	-1.1837	-0.590382	-0.26982	-0.501932	-0.994617	-0.798386	-0.466544	-0.715086	-0.325101	-0.387812	-0.195916	-0.252839
ABCC12	0.468162	0.499951	0.278733	0.344901	0.468056	0.365462	0.194265	0.130877	0.405305	0.374152	0.33368	0.354255	0.299424	0.282935	0.18545	0.185847	0.202891	0.113255	0.138776	-0.0458764	0.073982	0.0851275	0.072125	0.0516709	0.215638	0.114512	0.0705707	-0.105216
ABCC2	-0.262258	-0.246178	-0.466362	-0.498345	-0.312452	-0.374994	-0.321584	-0.543046	-0.42105	-0.34944	-0.411128	-0.410231	-0.35765	-0.368439	-0.267634	-0.354651	-0.555016	-0.374002	-0.412552	-0.165533	-0.606651	-0.45995	-0.557473	-0.386774	-0.454703	-0.474357	-0.147739	-0.494519
ABCC3	-0.248338	-0.470006	-0.288459	-0.200332	-0.366042	-0.363627	-0.0777822	-0.442879	-0.427254	-0.133219	-0.272927	-0.105226	-0.345616	-0.391992	-0.312527	-0.422398	-0.439665	-0.235203	-0.154249	-0.389915	-0.479891	-0.288012	-0.410193	-0.260068	-0.237899	-0.338094	0.0440008	-0.221399
ABCC4	-0.388556	-0.278962	-0.447941	-0.273661	-0.502697	-0.338314	-0.367849	-0.285489	-0.389397	-0.353401	-0.423755	-0.358078	-0.408167	-0.36137	-0.219225	-0.268146	-0.254418	-0.151184	-0.267531	-0.191367	-0.391997	-0.127723	-0.561174	-0.457394	-0.268064	-0.267628	-0.251247	-0.500888
ABCC5	-0.371481	-0.569396	-0.346108	-0.333828	-0.285643	-0.19619	-0.392307	-0.207735	-0.208682	-0.242339	-0.570681	-0.190317	-0.337246	-0.188633	-0.198615	-0.243723	-0.291481	-0.293045	-0.404941	-0.250818	-0.359783	-0.201546	-0.324929	-0.271479	-0.268082	-0.353614	-0.193725	-0.351589
ABCC6	-0.551525	-0.386311	-0.514845	-0.405488	-0.602376	-0.345358	-0.45	-0.377894	-0.309374	-0.287512	-0.344552	-0.374426	-0.245504	-0.31135	-0.40924	-0.387989	-0.325559	-0.314562	-0.35126	-0.431775	-0.577413	-0.312661	-0.516329	-0.642195	-0.458483	-0.441522	-0.791254	-0.35776
ABCC6P1	-0.679698	-0.598852	-0.736626	-0.504304	-0.716386	-0.531643	-0.458909	-0.521554	-0.780815	-0.758903	-0.819715	-0.575052	-0.558218	-0.7547	-0.482236	-0.865232	-0.654527	-0.611462	-0.598736	-0.452634	-0.756019	-0.407444	-0.478085	-0.549354	-0.644219	-0.550697	-0.483821	-0.533333
ABCC6P2	-0.0540335	0.0327173	0.00176045	0.05077	0.404498	-0.00580654	0.0335883	0.0594243	0.178102	-0.101589	-0.125339	-0.0284269	-0.00452824	-0.333628	-0.176771	0.00540233	-0.122205	0.032024	0.0703893	0.00223339	0.026128	-0.186756	0.181042	0.180993	0.0395911	-0.0172517	0.133758	-0.107268
ABCC8	0.439786	0.586997	0.643182	0.652449	0.692324	0.512298	0.562173	0.288458	0.542762	0.477579	0.474869	0.438905	0.567461	0.0942568	0.194053	0.228654	0.277301	0.289319	0.0335021	-0.105336	0.0649284	0.239648	0.323757	0.273838	-0.0156089	0.486714	0.422876	0.282298
ABCC9	-1.09446	-0.770478	-0.9318	-0.936013	-0.925681	-1.43832	-1.02476	-1.18337	-1.14905	-0.884346	-0.989737	-1.1096	-1.28513	-1.24267	-0.921705	-1.13482	-1.04918	-0.98454	-1.22763	-1.12904	-1.26457	-1.17421	-1.27875	-1.6235	-1.06999	-1.13605	-1.32656	-1.17481
ABCD1	-0.143593	-0.0512739	0.0524219	-0.0487916	-0.145924	-0.184443	-0.203804	-0.202519	-0.398455	-0.275996	-0.159075	-0.393113	-0.333417	-0.370985	-0.334952	-0.198182	-0.461055	-0.143638	-0.194417	-0.286982	-0.280973	-0.351691	-0.253213	-0.407081	-0.217389	-0.36229	-0.554842	-0.237665
ABCD3	-0.671315	-0.266631	-0.450147	-0.202387	-0.584111	-0.385478	-0.47285	-0.419759	-0.391918	-0.437589	-0.317822	-0.469337	-0.317598	-0.321888	-0.488452	-0.377259	-0.342932	-0.357151	-0.402183	-0.424976	-0.370613	-0.42529	-0.332187	-0.515632	-0.381607	-0.277556	-0.44623	-0.243565
ABCD4	-0.538042	-0.631264	-0.864797	-0.636148	-0.411779	-0.555745	-0.658673	-0.425047	-0.588068	-0.574135	-0.628794	-0.573847	-0.775359	-0.319594	-0.422511	-0.59605	-0.59817	-0.549551	-0.5026	-0.629821	-0.55332	-0.382873	-0.441909	-0.420412	-0.366353	-0.504163	-0.61921	-0.702432
ABCE1	0.051673	-0.0607759	-0.118348	-0.105246	0.0149248	0.149721	-0.146912	-0.227184	0.0537292	-0.0360413	-0.0187891	-0.0507217	-0.134589	-0.0160809	-0.131857	0.0102041	-0.10149	0.050719	0.0565176	0.0198376	-0.0886436	-0.0723371	-0.12549	0.177826	0.068299	0.0181759	-0.130458	-0.13503
ABCF1	-0.758281	-0.566304	-0.585774	-0.341972	-0.716457	-0.573491	-0.392304	-0.622285	-0.503302	-0.4206	-0.458641	-0.547584	-0.247065	-0.71033	-0.463598	-0.410159	-0.162851	-0.35554	-0.431622	-0.493271	-0.477088	-0.338106	-0.317971	-0.269543	-0.358703	-0.201814	-0.15454	-0.324631
ABCF2	-0.0357239	-0.260956	-0.061789	-0.0639438	-0.629852	-0.146987	0.0234932	-0.180874	-0.236613	0.232165	-0.0287463	0.0128405	0.0706526	0.17937	0.130499	0.277756	-0.00147799	0.183091	0.311617	0.163525	0.236564	0.178619	-0.0861374	-0.224397	0.480811	0.21263	0.230229	0.202159
ABCG1	0.216019	0.152454	0.117491	0.108398	-0.0538939	0.0721542	0.128774	0.046699	0.235525	0.176069	0.127332	0.111314	0.19349	0.196806	0.0904484	0.0549431	0.233873	0.084272	0.0160146	0.0463653	0.113992	0.163467	0.104108	-0.0033	0.0989657	0.100223	0.171617	0.19479
ABCG2	-0.297451	-0.210216	-0.587395	-0.822305	-0.382371	-0.648499	-0.530243	-0.628945	-0.476548	-0.436075	-0.364629	-0.145087	-0.825948	-0.34807	-0.219092	-0.229389	-0.345152	-0.398972	-0.239447	-0.428664	-0.307701	-0.250386	-0.383044	-0.122401	0.02621	0.0873772	-0.270961	-0.146698
ABCG4	-1.2334	-0.88155	-0.911699	-0.843667	-0.993292	-1.15208	-0.78834	-0.741206	-1.04753	-1.05331	-1.08532	-0.876828	-1.07547	-0.850349	-1.00427	-0.841992	-1.17239	-1.1647	-1.44221	-1.25377	-1.18201	-1.10981	-1.1691	-1.31839	-1.2073	-1.22604	-1.32334	-1.29342
ABCG5	0.248755	0.0669054	-0.124624	-0.0639294	0.332607	0.185125	0.0671036	0.0809881	0.318343	0.035075	0.315556	0.0759305	-0.359266	0.0151535	-0.04793	0.161368	0.0365014	0.153038	0.144573	0.073894	0.0127847	-0.0130484	-0.119619	-0.0273686	0.29846	0.152103	0.1139	0.0732303
ABCG8	-0.0878306	-0.0071809	0.0207825	0.0338366	-0.0147894	-0.205381	-0.0452427	0.151479	-0.0298586	0.0299545	-0.0123047	-0.0971632	-0.0216916	-0.166602	-0.0470438	-0.0340052	-0.05403	-0.163892	-0.0613995	-0.120871	0.0203046	-0.000560079	-0.107694	0.191967	-0.0453354	0.0376078	0.0191304	-0.096401
ABHD10	-0.682311	-0.536815	-0.749737	-0.842286	-0.664393	-0.756407	-0.735617	-0.759043	-0.77317	-0.590978	-0.739609	-0.549137	-0.591537	-0.686866	-0.698805	-0.632393	-0.743671	-0.507243	-0.676229	-0.37466	-0.536923	-0.545526	-0.561598	-0.667974	-0.62445	-0.556902	-0.666066	-0.262823
ABHD12	0.0259407	-0.0288683	-0.186716	-0.174197	-0.147595	0.134221	-0.248627	-0.215607	0.126422	0.251188	0.181197	0.0580007	-0.178538	0.133096	0.0764731	0.22168	-0.113566	-0.00990729	0.0934148	-0.183822	-0.215539	-0.0883471	-0.148681	-0.0918202	-0.0750174	-0.166842	-0.358663	-0.00656469
ABHD12B	-0.6484	-0.896631	-0.65162	-1.46599	-1.30967	-1.25056	-1.52624	-1.1259	-0.959566	-0.470675	-1.47954	-0.979825	-1.17041	-0.93449	-1.20947	-1.26072	-1.18589	-0.931943	-1.16768	-1.04905	-0.932175	-1.09506	-1.48678	-1.48228	-1.04664	-1.24186	-1.33389	-1.1619
ABHD13	-0.329587	-0.41056	-0.0825008	-0.25671	-0.288861	-0.562414	-0.282087	-0.588606	-0.550329	-0.34234	-0.483922	-0.459756	-0.152422	-0.636596	0.0250509	-0.213919	-0.250167	-0.222707	-0.0960443	-0.296131	-0.171918	-0.450435	-0.81311	-0.214679	-0.382229	0.0739644	-0.169764	-0.0851129
ABHD14B	0.164249	0.578263	0.733143	0.0407346	0.352111	0.685035	0.354256	0.1916	0.334282	0.626017	0.36627	0.657626	0.749868	0.741006	0.164739	0.774422	0.588026	0.594877	0.386466	0.752477	0.556894	0.50654	0.716318	0.57113	0.504063	0.524618	0.674692	-0.168778
ABHD16B	-1.20627	-0.547875	-0.522853	-0.52086	-0.640948	-0.980719	-0.609919	-0.53438	-0.677604	-0.663172	-0.393058	-0.766497	-0.64659	-0.896003	-0.759191	-0.741386	-0.99837	-0.771803	-0.918246	-0.818058	-0.924898	-0.944133	-1.04177	-0.921933	-0.896482	-0.778221	-1.01244	-0.710618
ABHD17A	0.109002	0.124502	0.0531849	0.0589744	0.0680972	0.116048	0.0684888	-0.00710049	0.200433	0.112312	0.274987	0.189381	0.116404	0.171716	0.145177	0.221167	0.171473	0.104467	0.172272	0.0541506	0.0875639	0.077374	0.0408962	0.211551	0.0108341	-0.101621	0.0639098	-0.0402033
ABHD17B	-0.147297	-0.228582	-0.138367	0.024575	0.0111174	-0.159851	-0.0419136	-0.00486567	-0.313572	0.0366784	-0.0797034	0.0296045	-0.102843	0.0537789	0.0313619	-0.162532	-0.278109	-0.123542	0.0662232	0.0464939	-0.316606	-0.36029	-0.2319	-0.393968	-0.0771055	-0.162569	-0.156988	-0.211824
ABHD17C	-0.741053	-0.602786	-0.400266	-0.851856	-1.08879	-0.762555	-0.678282	-0.608121	-0.549697	-0.301063	-0.406321	-0.658623	-0.347724	-0.949506	-0.422937	-0.529792	-0.225614	-0.15921	-0.214006	-0.424202	-0.126923	-0.38593	-0.596425	-0.906038	-0.0971887	-0.053394	-0.144532	-0.114051
ABHD18	-1.87998	-1.5599	-1.85734	-1.53202	-1.54143	-1.73195	-1.52014	-1.23381	-1.36453	-1.32951	-1.4585	-1.44965	-1.45688	-1.01009	-1.16366	-1.64034	-1.22408	-1.17765	-1.34766	-1.62706	-1.34477	-1.05861	-1.20306	-1.02816	-1.10434	-1.25758	-0.837789	-1.1865
ABHD2	0.544147	0.366772	0.354464	0.298943	0.471413	0.350565	0.329664	0.410404	0.191757	0.240152	0.292647	0.314752	0.32685	0.329489	0.249636	0.226121	0.195918	0.11634	0.254983	0.195126	0.315957	0.184711	0.332962	0.356859	0.244021	0.156135	0.173124	0.102208
ABHD3	-0.858503	-0.673288	-1.07695	-0.976353	-0.821646	-0.930718	-1.1139	-0.884238	-1.23556	-0.866719	-0.770057	-0.764564	-0.853039	-1.03153	-0.915775	-0.88596	-1.08441	-0.613625	-0.765851	-0.933601	-0.72075	-0.786804	-0.676236	-0.789136	-0.696946	-1.06711	-0.971573	-0.740072
ABHD4	-0.199604	-0.228115	-0.321719	-0.358345	-0.282104	-0.294268	-0.240353	-0.352748	-0.153319	-0.150156	-0.403857	-0.331478	-0.199143	-0.0131164	-0.157496	-0.24397	-0.134489	-0.273088	-0.206698	-0.262323	-0.307933	-0.207629	-0.230616	-0.281175	-0.154028	-0.231186	-0.370316	-0.214862
ABHD5	-0.762038	-0.638453	-0.811755	-0.583135	-0.689608	-0.871906	-0.0280085	-0.740478	-0.60965	-0.530914	-0.303245	-0.431712	-0.497948	-0.325138	-0.517053	-0.507221	-0.664899	-0.643905	-0.36451	-0.460678	-0.612484	-0.630119	-0.671851	-0.530157	-0.647595	-0.424606	-0.679678	-0.510366
ABHD8	0.202955	-0.0321908	-0.174683	0.115087	-0.289058	0.0975584	-0.0195607	0.0461457	-0.0704493	-0.012458	-0.196413	-0.180994	-0.0508632	-0.115343	-0.0141389	0.253166	0.135649	0.227018	0.20051	0.195991	-0.128651	-0.0445137	-0.158945	0.052559	0.0495399	0.148767	0.293103	0.190799
ABI1	-0.874548	-0.812519	-1.18327	-0.654762	-0.764395	-0.975375	-0.957951	-0.589735	-0.803786	-0.703716	-1.16973	-0.908877	-0.963824	-0.808082	-1.02657	-0.880514	-0.958768	-0.63702	-0.743127	-0.868563	-0.989583	-0.700958	-1.12718	-1.19157	-0.81705	-0.859183	-0.729401	-1.04228
ABI2	-0.143593	-0.516028	-0.483471	-0.460983	-0.651241	-0.46142	-0.590205	-0.407343	-0.500295	-0.41167	-0.206939	-0.520178	-0.37761	-0.199895	-0.152876	-0.102343	-0.163881	-0.159954	-0.104666	0.00573905	-0.174829	-0.0555312	-0.17899	-0.0243687	-0.0222591	-0.051732	0.14217	0.0663067
ABI3	-0.231672	-0.207357	-0.373341	-0.263511	-0.103815	-0.0597105	-0.0757361	0.137958	-0.445394	-0.451265	-0.531833	-0.368069	-0.371299	-0.0437455	-0.258763	-0.48822	-0.0912751	-0.339291	-0.163364	-0.0131167	-0.0959103	-0.111058	-0.0539279	-0.0381758	-0.037731	-0.0376177	-0.103603	-0.116007
ABI3BP	0.103167	0.0246845	-0.00226323	0.0615897	0.0491372	0.0743687	0.0614644	0.0998061	-0.11863	0.0737873	0.00102658	0.118559	-0.081479	-0.0724864	-0.0242082	-0.129368	0.0190581	0.0271719	-0.116593	-0.0750799	-0.037624	0.0355451	-0.0231806	-0.155727	-0.0912558	-0.0710705	0.107403	-0.0729308
ABL1	0.324961	0.316483	0.185281	0.0769525	0.488634	0.369322	0.38213	0.284842	0.414052	0.267641	0.304663	0.369915	0.442136	0.447712	0.351546	0.246999	0.167273	0.159725	0.0777821	0.309748	0.137362	0.234147	0.29504	0.366799	0.173195	0.210049	0.304159	0.150135
ABL2	-0.240266	-0.0608351	-0.0463232	-0.153776	-0.00451666	0.0241997	-0.165421	-0.115674	-0.177642	-0.011712	-0.418936	-0.102903	-0.0388877	0.085956	-0.101951	-0.0574	-0.33394	-0.0350526	-0.316254	-0.191156	0.193272	0.164364	0.133422	-0.461059	0.131925	0.0264539	0.0213596	-0.208056
ABLIM1	0.509967	0.378485	0.551581	0.612984	0.511226	0.58944	0.386674	0.523276	0.988588	0.617487	0.737707	0.826896	0.925262	1.09336	1.11644	0.935503	0.928524	0.963326	0.848518	0.996411	0.827802	0.897343	1.05455	1.01437	0.923185	0.759029	0.913385	0.930115
ABLIM2	0.24415	0.384739	0.319034	0.516762	0.00581339	0.259813	0.436438	0.0494903	0.424058	0.236512	0.360487	0.219093	0.437497	0.272866	0.442199	0.799075	0.969852	0.723293	0.666434	0.489505	0.260113	0.363122	0.499632	0.438007	0.486674	0.367267	0.215573	0.323018
ABLIM3	0.83909	0.396931	0.753414	1.01508	0.609426	0.719369	0.893993	1.53994	1.01119	0.256702	0.713038	0.785165	0.658821	0.894541	0.588205	0.815943	1.31275	0.929241	0.930201	0.753554	1.0911	1.10574	1.03746	1.03852	1.16983	0.870762	1.02919	1.18376
ABR	-0.062949	-0.141075	-0.116709	-0.061187	-0.0453769	-0.00999497	0.0235527	0.0324494	0.205939	0.0125649	0.0514917	0.12635	-0.00521452	0.0588571	-0.0851424	-0.0203242	0.015998	0.096082	0.0273152	-0.00445042	0.0421735	0.128678	-0.0152163	0.286722	-0.0748555	0.0533066	0.184979	0.173067
ABRACL	-1.01408	-0.803711	-0.75928	-0.768364	-0.699365	-0.859137	-0.4619	-0.938041	-1.12142	-0.674844	-0.953641	-0.785956	-0.746339	-1.03242	-0.939923	-0.800313	-1.31408	-0.990484	-0.847579	-0.874963	-0.988316	-1.0528	-1.31401	-1.56164	-0.928712	-0.844186	-1.23221	-1.04646
ABT1	-0.591459	-0.362921	-0.5177	-0.447399	-0.427428	-0.583883	-0.294347	-0.453229	-0.592973	-0.513981	-0.481041	-0.605185	-0.514073	-0.798946	-0.618739	-0.52009	-0.654425	-0.506808	-0.514146	-0.814728	-0.651358	-0.71932	-0.581533	-0.735531	-0.670327	-0.502057	-0.611611	-0.33559
ABTB1	0.570905	0.573188	0.449201	0.436542	0.350055	0.417748	0.695923	0.656552	0.724191	0.628546	0.6014	0.848231	0.784786	0.935385	0.657074	0.91638	0.880305	0.807179	0.612365	0.759495	0.766029	0.892767	0.803275	0.695335	0.80638	0.767507	0.603672	0.695404
ABTB2	0.451777	0.271965	0.270554	0.222964	0.25006	0.378353	0.16614	0.314478	0.309781	0.317562	0.28799	0.242712	0.269557	0.207818	0.331126	0.243108	0.325633	0.283576	0.18271	0.434225	0.274171	0.315215	0.380154	0.512073	0.277867	0.235988	0.455601	0.251446
ACAA1	0.382598	0.195899	0.415274	0.383638	0.375001	0.409005	0.181319	0.153138	0.397424	0.284975	0.408605	0.339606	0.224212	0.362195	0.386356	0.349637	0.398381	0.23151	0.31908	0.316528	0.477516	0.23655	0.496362	0.698694	0.327853	0.314624	0.363741	0.378117
ACAA2	-0.669776	-0.738022	-0.606849	-0.688978	-0.516515	-0.672993	-0.631144	-0.396845	-0.655877	-0.858194	-0.906833	-0.988943	-0.840243	-0.427842	-0.813596	-0.811158	-0.820932	-0.942446	-0.676372	-0.655673	-0.766439	-0.678041	-0.649185	-0.872844	-0.470885	-0.674315	-0.913703	-0.693839
ACACA	-0.0658128	-0.0609194	-0.0813984	-0.095343	-0.191387	-0.0810686	-0.110366	0.0791542	-0.097046	-0.0465262	-0.191061	-0.00634965	-0.101007	-0.205023	-0.120749	-0.00529842	-0.143652	-0.0703611	-0.079055	0.0453538	-0.0837115	0.0205368	-0.10304	-0.0951704	-0.0309676	0.0298904	0.108223	-0.0996387
ACACB	0.0921802	-0.277005	-0.320028	-0.0744319	0.0228052	-0.0664627	-0.366343	-0.0388209	0.157168	-0.136313	-0.12136	0.263064	0.0369809	0.348555	0.19655	-0.0480401	0.0820159	0.115617	0.132751	-0.0300737	0.0404642	0.20573	0.146884	-0.0508062	-0.03249	0.0896332	-0.360705	0.0505098
ACAD10	0.863051	0.753384	0.818855	0.671453	0.719275	0.814662	0.633611	0.595828	0.83978	0.655256	0.687614	0.842203	0.847125	0.772871	0.706164	0.58249	0.516054	0.293666	0.355511	0.37638	0.457379	0.519107	0.544324	0.467429	0.470628	0.383729	0.331024	0.374307
ACAD11	0.429094	-0.0400759	-0.363447	-0.227554	-0.0512142	-0.517478	-0.149733	-0.255648	0.263681	-0.051263	-0.173287	-0.0836244	0.206969	0.00640663	0.380144	0.0270351	0.0487044	0.1523	-0.218757	-0.0823918	-0.0901557	0.160191	0.0418115	-0.258673	0.348898	0.395421	0.161964	0.316987
ACAD8	-0.236712	-0.30768	-0.0403516	0.0354182	0.00817468	-0.19647	-0.0097301	0.104806	-0.139253	0.0165574	-0.0105179	0.0541767	0.0916067	-0.01499	0.109256	0.0356888	-0.040061	0.169434	0.125713	-0.0147712	-0.00575093	0.0164922	0.133484	0.315775	0.0597525	0.211009	0.0825024	0.113886
ACAD9	-0.331042	-0.0884751	-0.14806	-0.0697416	-0.177379	-0.168962	-0.209299	-0.109684	-0.125498	-0.194758	-0.129619	-0.194146	-0.123816	-0.266559	-0.264886	-0.194052	-0.14062	-0.0933147	-0.15135	-0.108938	-0.0432825	-0.0695814	-0.176808	-0.256474	-0.149097	-0.147412	-0.0722954	-0.0655787
ACADM	0.462503	0.498149	0.620843	0.721069	0.459966	0.550938	0.415385	0.423902	0.50111	0.507338	0.680503	0.547286	0.420888	0.755881	0.688968	0.843976	1.11595	0.771877	1.02444	0.910497	0.627307	1.00491	0.734947	1.37687	0.786507	0.837056	1.58691	0.899382
ACADS	-0.411362	-0.387675	-0.254461	-0.346629	-0.646732	-0.458647	-0.243982	-0.367572	-0.413597	-0.470841	-0.450967	-0.386461	-0.422856	-0.447494	-0.434049	-0.413689	-0.473993	-0.339605	-0.447232	-0.640701	-0.126579	-0.424572	-0.33588	-0.0356287	-0.259749	-0.453518	-0.177915	-0.294274
ACADSB	-0.660719	-0.331248	-0.484106	-0.166339	-0.234894	-0.474079	-0.393484	-0.198497	-0.443505	-0.38628	-0.257049	-0.179009	-0.309735	-0.238394	-0.225885	-0.276966	-0.349521	-0.43245	-0.399412	-0.314758	-0.52021	-0.306489	-0.242278	-0.0562393	-0.219323	-0.226421	-0.219384	-0.181208
ACADVL	-0.103874	-0.0898917	-0.215192	0.126453	-0.218139	-0.226594	0.0103566	-0.322497	-0.12893	-0.244242	-0.38721	-0.272126	-0.356109	-0.453599	0.102472	-0.0379884	0.0370259	0.109779	0.0626638	-0.277303	0.0120194	0.124256	-0.162199	-0.211312	-0.0610539	-0.0985206	-0.0775239	-0.00779998
ACAN	0.523891	0.266592	0.402253	0.114717	0.346716	0.451636	0.259698	0.43913	0.326969	0.137875	0.192984	0.194923	0.260734	0.320685	0.134431	0.180368	0.239101	0.0728837	0.262534	0.237369	0.431717	0.170684	0.113935	0.225581	0.237725	0.187896	0.186317	0.154463
ACAP1	0.442554	0.572961	0.597975	0.332422	0.721831	0.811343	0.557371	0.720973	0.696485	0.620955	0.561794	0.434968	0.43328	0.441924	0.274504	0.342652	0.229437	0.262804	0.397045	0.410085	0.572647	0.380907	0.393301	0.404384	0.260108	0.23199	0.355361	0.536125
ACAP2	0.000385552	-0.0546793	0.0148539	-0.0574476	-0.107825	-0.215249	-0.117479	-0.0731574	-0.15511	-0.0303834	-0.21514	-0.197384	-0.129513	-0.437145	0.200004	-0.099839	-0.201331	-0.234936	-0.109516	-0.234524	-0.169494	-0.0520077	-0.148146	-0.1426	-0.135222	-0.177986	-0.0445826	-0.263171
ACAP3	0.695903	0.456197	0.473694	0.558011	0.424716	0.793792	0.489726	0.510932	0.635468	0.452996	0.529633	0.692647	0.487743	0.540658	0.454879	0.626881	0.541898	0.549046	0.491682	0.616388	0.506299	0.495557	0.596965	0.639962	0.612644	0.407309	0.349071	0.17929
ACAT2	-2.42149	-2.35212	-2.31057	-1.98224	-2.2153	-2.37447	-2.08515	-1.95697	-2.17812	-2.05469	-1.65458	-1.92101	-1.26593	-2.0591	-1.30782	-1.72396	-1.77604	-1.95631	-1.90355	-1.58684	-1.83481	-2.08537	-2.15249	-2.38327	-1.99086	-2.02142	-1.81295	-1.78368
ACBD3	-0.298821	0.181419	0.173908	0.0190269	-0.0290783	0.0846282	-0.139663	0.0311869	-0.00561547	0.0426308	0.164396	0.129871	-0.0194854	-0.0489228	-0.093099	0.0941943	-0.104122	0.0341883	-0.126731	0.0463734	-0.0196438	0.00988732	0.0172006	0.0443277	0.102193	0.0184146	0.198515	-0.0371923
ACBD4	0.371559	0.564476	0.670549	0.514124	0.547287	0.440208	0.460747	0.609427	0.539067	0.344977	0.693857	0.508798	0.497027	0.548517	0.542636	0.361943	0.43457	0.31564	0.421195	0.452828	0.440608	0.39452	0.570223	0.641986	0.233293	0.240799	0.266342	0.648651
ACBD5	-0.741504	-0.57371	-0.927086	-0.66513	-0.680828	-0.525361	-0.781819	-0.753856	-0.5686	-0.741945	-0.584248	-0.618894	-0.539613	-0.393509	-0.642605	-0.636078	-0.412882	-0.375901	-0.715419	-0.565286	-0.724614	-0.574433	-0.576529	-0.577591	-0.483425	-0.570791	-0.583982	-0.458935
ACBD6	-1.70315	-1.40484	-1.43911	-1.24921	-1.33105	-1.41386	-1.32032	-0.984825	-1.31141	-1.22658	-1.37824	-1.24572	-1.46601	-1.06898	-1.20884	-1.61232	-1.28025	-1.46024	-1.63155	-1.58149	-1.52068	-1.25106	-1.43504	-1.64493	-1.44645	-1.60229	-1.63443	-1.44113
ACBD7	-0.496188	0.0954986	-0.268688	-0.298372	-0.116582	-0.385897	-0.263992	-0.309109	-0.407037	-0.217285	-0.170763	-0.12476	-0.457556	-0.13591	-0.317291	-0.446602	-0.144102	-0.244665	0.0823463	-0.195719	-0.118145	-0.0772529	-0.0942049	0.0979842	-0.513147	-0.387174	-0.225696	0.0542367
ACCS	0.225778	0.0914536	-0.136442	0.0978529	0.260165	-0.0832424	-0.312425	-0.192992	-0.110109	0.0135978	-0.0695472	0.071135	0.0748086	-0.117971	-0.201876	0.146134	-0.247753	-0.1289	-0.171214	0.0514883	-0.119184	-0.0206348	-0.0406699	-0.141715	-0.11862	-0.177127	-0.152192	-0.0352718
ACE2	0.372151	0.279293	0.229329	1.19513	0.197143	0.342921	0.239172	0.206297	0.280893	0.109024	0.501107	0.368568	0.42354	0.27703	0.208796	0.427722	0.149719	0.803712	0.471813	0.60552	1.01792	0.512867	0.641767	0.780547	0.146298	1.25981	1.34889	0.50316
ACER2	-0.590583	-0.511542	-0.266	-0.310804	-0.5043	-0.299613	-0.128376	-0.184424	0.342122	0.158331	-0.0609698	-0.0662428	0.258389	-0.309918	-0.100307	-0.189732	-0.202481	-0.0458918	-0.0764927	-0.218305	-0.190777	-0.0191457	-0.52324	0.074041	0.0149126	-0.0839963	-0.237974	-0.159661
ACER3	-0.615499	-0.418387	-0.533403	-0.552015	-0.498697	-0.72007	-0.659874	-0.622577	-0.711993	-0.789265	-0.665937	-0.524294	-0.648024	-0.626846	-0.359268	-0.618308	-0.574574	-0.391235	-0.641894	-0.584149	-0.176231	-0.302707	-0.476942	-0.370193	-0.354689	-0.365918	-0.510409	-0.514827
ACHE	-0.529725	-0.590418	-1.13117	-0.493751	-0.475228	-0.211179	-0.402278	-0.0761942	-0.390348	-0.553592	-0.570339	-0.634412	-0.376956	-0.29325	-0.273482	-0.827393	-0.288962	-0.31613	-0.731573	-0.319554	-0.622413	-0.367308	-0.576505	-0.153247	-0.61543	-0.444772	-0.420031	-0.696006
ACKR1	0.425391	0.443612	0.46735	0.271153	0.380239	0.587505	0.866734	0.409175	0.598197	0.668297	0.452622	0.429963	0.474364	0.414816	0.584611	0.311463	0.593141	0.242776	0.371566	0.301142	0.399745	0.377884	0.206437	0.428954	0.18106	0.371265	0.150709	0.220585
ACKR2	-0.632929	-0.417201	-0.406169	-0.425956	-0.396788	-0.659043	-0.679026	-0.489206	-0.820652	-0.443352	-0.533498	-0.509761	-0.707459	-0.546397	-0.393073	-0.685256	-0.432315	-0.390319	-0.613031	-0.651051	-0.640064	-0.629041	-0.593879	-0.610391	-0.509853	-0.442851	-0.428465	-0.544058
ACKR3	0.386698	0.167765	0.0837902	0.150283	0.195584	0.240603	0.25854	0.30091	0.281094	0.188786	0.307139	0.223749	0.114235	0.019016	0.211215	0.144353	0.0808218	0.152915	0.135646	0.180223	0.238359	0.229692	0.420107	0.386239	0.350523	0.219126	0.107439	0.268713
ACMSD	0.302882	0.257228	0.25041	0.251419	0.284097	0.223293	0.230322	0.257552	0.222456	0.157246	0.206784	0.12091	0.172668	0.1715	0.215891	0.142067	0.196936	0.119593	0.151179	0.163677	0.176045	0.141075	0.118683	0.191742	0.142524	0.105724	0.0730861	0.208548
ACO1	-0.16368	-0.372324	-0.406797	-0.254416	-0.314719	-0.322121	-0.369664	-0.322441	-0.311958	-0.222216	-0.35442	-0.208663	-0.136089	-0.223983	-0.208982	-0.294658	-0.177837	-0.125	-0.394665	-0.160339	-0.182507	-0.100055	-0.12686	0.0214079	-0.0844777	-0.126222	-0.173948	-0.273353
ACOT11	-0.348328	-0.104793	-0.212162	-0.196847	-0.0397159	-0.0411667	-0.0455683	-0.227763	0.0226408	-0.248581	-0.0928965	-0.166871	-0.0908408	0.0358076	-0.144786	-0.117578	-0.130955	-0.261895	-0.0679701	-0.209052	0.156131	0.0950785	0.146967	-0.189192	0.14194	-0.132676	-0.0652531	0.114545
ACOT12	-0.849221	-0.786453	-0.872645	-0.54244	-0.507591	-0.616484	-0.363752	-0.371553	-0.625642	-0.555027	-0.653568	-0.570532	-0.864569	-0.446802	-0.408961	-0.424004	-0.48741	-0.594129	-0.585402	-0.661772	-0.752818	-0.486579	-0.598587	-0.584719	-0.523175	-0.548382	-0.391393	-0.52147
ACOT13	0.269826	0.115705	0.151968	0.133509	0.383903	0.229056	0.146256	0.260575	0.15468	0.0589189	0.149111	0.00849387	0.0713591	-0.143676	-0.0632506	-0.104446	-0.127721	-0.116227	-0.138273	-0.309217	0.0224005	-0.0896884	-0.0241009	-0.17629	-0.117999	-0.0990381	-0.0237282	-0.00663297
ACOT4	-0.566819	-0.60542	-0.360559	-0.449836	-0.328894	-0.60236	-0.570138	-0.557238	-0.885733	-0.42731	-0.636082	-0.625366	-0.711695	-0.56403	-0.312794	-0.691801	-0.466895	-0.395568	-0.756319	-0.824348	-0.574974	-0.533277	-0.635046	-0.611279	-0.41772	-0.577911	-0.536921	-0.742066
ACOT6	0.234924	-0.0180029	0.25819	0.230388	0.297991	0.354459	0.106458	0.17309	0.524567	0.19415	0.242184	0.254991	0.332422	0.294406	0.252005	0.328523	0.233902	0.168544	0.11511	0.182154	0.169162	0.152088	-0.0811116	0.324819	0.198944	0.236363	0.167689	0.271529
ACOT7	0.276503	0.138116	0.240391	0.154711	0.276031	0.222526	-0.0358037	0.148981	0.0954177	-0.0945721	0.073164	0.00951964	-0.0463276	-0.00568578	-0.0218914	-0.00295387	0.0300884	0.00940149	0.127351	0.150554	0.111098	0.135751	0.154398	0.0322679	0.140513	-0.0498364	-0.0285231	-0.120437
ACOT8	-0.757931	-0.557734	-0.494251	-0.332327	-0.557684	-0.665726	-0.13586	-0.441389	-0.529769	-0.289525	-0.351309	-0.238407	-0.07682	-0.700688	-0.55769	-0.744699	-0.489623	-0.459308	-0.497909	-0.473341	-0.464367	-0.497752	-0.564416	-0.405648	-0.654074	-0.551948	-0.418288	-0.257817
ACOX1	-0.153555	-0.358574	-0.289762	-0.255421	-0.328515	-0.158466	-0.338958	-0.245718	0.191156	-0.244464	-0.31267	0.101535	0.138866	0.0680831	0.127842	0.129766	-0.0873567	-0.0528725	-0.0397773	0.0490836	-0.148357	-0.092521	-0.177473	0.0390454	-0.105535	-0.206493	-0.0318378	-0.0455887
ACOX2	-0.142579	-0.294426	-0.0103077	-0.200909	-0.0298433	-0.148013	-0.162852	-0.104978	0.018946	-0.173515	-0.0183894	-0.154381	-0.103627	0.0242938	0.00327701	-0.0459219	-0.0820653	0.0555604	-0.0302506	-0.114574	-0.303764	-0.132558	-0.224252	-0.101552	-0.177567	-0.135425	0.0586376	-0.0953099
ACOX3	-0.130881	-0.116531	0.145435	0.123259	-0.0489392	-0.0723215	0.119321	0.118762	-0.13001	-0.100411	0.000497939	-0.136882	-0.0813802	-0.0717545	0.00126467	0.032131	-0.0787272	-0.0191733	-0.104616	0.066868	-0.0608419	-0.116359	-0.12749	-0.169332	-0.141939	-0.180048	-0.197327	-0.0549385
ACP1	0.0488967	-0.0525663	-0.00665213	0.0530682	0.007087	-0.211904	-0.0482744	-0.146386	0.0538895	-0.0331644	-0.0978114	-0.0362704	-0.0855992	-0.0470204	-0.00276736	0.109513	-0.122039	-0.00323709	0.0359304	-0.0539724	-0.0070862	0.0401227	-0.013355	-0.0233051	-0.0213132	0.198409	0.0539576	0.0551737
ACP5	0.163717	0.186933	0.255127	0.314474	0.204123	0.235673	0.396526	0.0417515	0.28151	0.186574	0.263795	0.216514	0.0305505	0.189557	0.159153	0.139338	0.142464	0.0693872	0.120608	0.22406	0.194234	0.18557	0.147546	0.550942	0.0820128	0.260221	0.351846	0.478016
ACP6	0.299075	0.70349	0.506142	0.497501	0.371662	0.428295	0.31485	0.496775	0.211952	0.212947	0.362014	0.370426	0.423256	0.334379	0.335269	0.339386	0.210457	0.27024	0.37525	0.233182	0.307498	0.180071	0.0539408	0.3636	0.179967	0.154134	0.297368	0.461036
ACPP	-2.65037	-2.44559	-2.38852	-2.27894	-2.29307	-2.31224	-0.480588	-1.7816	-2.37626	-1.99296	-1.16521	-2.34667	-2.03075	-2.09331	-2.01416	-1.37528	-1.63173	-1.67671	-0.496236	-1.48954	-1.32743	-1.56883	-1.55207	-1.54144	-1.47949	-1.43393	-1.44118	-1.12713
ACPT	0.202883	0.303376	0.158451	0.270515	0.174791	0.158143	0.258771	0.116042	0.226445	0.228622	0.24169	0.171186	0.231893	0.152422	0.207184	0.213151	0.239188	0.118011	0.167467	0.20909	0.199965	0.120621	0.248444	0.315733	0.158189	0.151592	0.0562822	0.257766
ACRBP	0.101321	0.146236	0.157913	0.125555	0.156693	0.151512	0.214598	0.17819	0.0784434	0.208341	0.193762	0.0680598	0.216665	0.0409064	0.18702	-0.00562715	-0.0067033	0.0654235	0.0364232	0.0586713	0.0314308	0.0254775	0.0709203	0.170845	-0.0537591	0.046226	0.0323147	0.0445654
ACRC	0.193663	0.302641	-0.0235035	-0.353928	-0.03637	0.339068	-0.171482	0.162147	0.0899869	-0.0120765	0.323459	-0.0530814	-0.151788	0.0577863	0.326412	-0.138937	0.421975	-0.262534	0.0904294	0.16067	0.0211249	0.0105754	0.244935	0.0792052	0.131553	0.0549062	-0.0713289	0.0607015
ACSF2	-0.676061	-0.453621	-0.561989	-0.743926	-0.845274	-0.806419	-0.838238	-0.619189	-0.826095	-0.524505	-0.812717	-0.542922	-0.631598	-0.667043	-0.740731	-0.842444	-0.59719	-0.441883	-0.821101	-0.679802	-0.652823	-0.583344	-0.555363	-0.846093	-0.807718	-0.569423	-0.647163	-0.7441
ACSF3	-0.0147871	0.0892941	0.021603	0.198944	0.133093	0.0102819	0.103238	-0.033148	-0.0569022	0.0604576	0.220509	0.0621335	0.0346559	0.0756527	0.0160542	0.0896088	0.201466	0.119267	0.0523481	0.0134275	0.0242154	0.0753501	-0.0178794	0.0410624	0.0913929	-0.00668026	-0.0396875	-0.0398564
ACSL1	0.802794	0.682254	0.427625	1.14208	0.71177	0.733274	0.374793	-0.102363	1.49324	0.900581	0.780256	1.2935	1.15144	0.644853	1.36327	1.03954	1.0521	1.63909	1.45868	1.4283	1.17722	1.1298	1.49749	1.27266	1.0848	1.22938	1.47283	1.12939
ACSL3	-0.332686	-0.324825	-0.250232	-0.524539	-0.330449	-0.381525	-0.596407	-0.494973	-0.741456	-0.549467	-0.354071	-0.373891	-0.485601	-0.544071	-0.337836	-0.320198	-0.356944	-0.248023	-0.385973	-0.396977	-0.424479	-0.413896	-0.498538	-0.626751	-0.354381	-0.31676	-0.546342	-0.622647
ACSL4	-0.293399	-0.108495	-0.198529	-0.49067	-0.199915	-0.42953	-0.2376	-0.290559	-0.471882	-0.16443	-0.235107	-0.263433	-0.305897	-0.27342	-0.345603	-0.120202	-0.515123	-0.352252	-0.139469	-0.363273	-0.34918	-0.207487	-0.0993449	-0.410988	-0.260976	-0.317382	-0.30421	-0.27662
ACSL6	0.422746	0.293923	0.307301	0.288206	0.341335	0.429668	0.113422	0.319292	0.378911	0.14704	0.22622	0.278304	0.242162	0.271965	0.205672	0.244746	0.305782	0.262499	0.171536	0.282434	0.361989	0.145947	0.154127	0.118014	0.092078	0.190262	0.0356158	0.126155
ACSM1	-0.270442	0.00543861	-0.0249034	-0.0965192	-0.0338516	-0.159022	-0.242224	-0.256599	-0.267625	-0.107773	-0.225566	-0.0543629	-0.219796	-0.301992	-0.179249	-0.0797066	-0.173699	-0.341728	-0.192929	-0.173917	-0.29541	-0.0700085	-0.261279	-0.544259	-0.126664	-0.183891	-0.577802	-0.221344
ACSM2A	0.0403255	-0.216143	-0.0460598	0.221086	0.0870801	0.322338	-0.0718451	0.234172	0.0612786	0.209978	0.220108	0.305199	0.200011	-0.046421	0.00219639	0.09604	0.268173	0.0654804	0.158929	0.352171	0.220959	-0.0690764	0.0297018	0.141513	0.0126006	0.0160519	-0.0688111	-0.292461
ACSM2B	-0.276663	-0.284632	-0.1441	-0.207743	-0.256334	-0.268282	-0.177924	-0.209557	-0.088506	-0.196579	-0.165826	-0.0653832	-0.00778841	0.0226456	0.0410998	-0.00186466	-0.0173831	0.138181	-0.137176	-0.0343289	-0.076457	0.076895	0.0726135	0.28477	-0.141096	0.0357692	-0.00952367	-0.149424
ACSM3	0.316729	0.417754	0.273053	0.250885	0.45746	0.496579	0.349637	0.2137	0.0790933	-0.105553	-0.0080959	0.446259	0.127864	-0.0723633	0.146974	0.301453	0.243003	0.408244	0.312101	0.196418	0.143113	0.161501	0.583348	-0.099145	0.0538546	0.113922	0.180734	-0.00139791
ACSM5	0.0473723	-0.0170995	0.162012	-0.137627	0.216061	-0.0927399	-0.0471579	0.0315707	0.0844737	0.0410809	-0.0624345	-0.186067	0.140769	0.301019	0.0583663	0.0196763	0.418501	0.15945	0.293814	0.0516552	0.223325	0.159326	0.213207	0.15261	0.143988	0.241739	0.209155	0.129364
ACSM6	-1.19178	-0.957984	-1.2566	-0.925723	-0.996076	-1.05855	-1.22159	-0.734388	-0.916413	-0.803609	-1.11507	-1.21723	-0.931602	-0.680239	-0.855608	-1.08961	-1.05238	-0.927528	-1.31844	-1.21467	-0.756516	-0.617495	-0.673648	-1.035	-0.843538	-0.974934	-0.934692	-1.02257
ACSS1	-0.39691	-0.265671	-0.369395	-0.232499	-0.360805	-0.471714	-0.27888	-0.214478	-0.329361	-0.289194	-0.26209	-0.288423	-0.288393	-0.396208	-0.308527	-0.335797	-0.449705	-0.250043	-0.396015	-0.409821	-0.128712	-0.107729	-0.273099	-0.252859	-0.299763	-0.153178	-0.301508	-0.148377
ACSS2	0.166883	-0.0512468	0.0815826	0.197546	0.210662	0.211568	-0.170204	0.0528301	0.0389854	-0.0398722	0.261535	0.301019	0.0528087	0.337844	0.382992	0.0221028	0.147231	-0.0669685	0.0119491	0.144382	0.139764	0.0659336	0.111092	0.357266	0.094861	0.0642939	0.177263	0.189265
ACSS3	-0.549187	-0.458529	-0.42709	-0.432201	-0.497132	-0.463168	-0.36647	-0.492614	-0.560124	-0.45837	-0.376859	-0.511651	-0.390981	-0.541954	-0.397493	-0.465337	-0.498015	-0.353952	-0.493311	-0.396413	-0.501022	-0.457735	-0.45769	-0.643225	-0.486843	-0.321234	-0.479701	0.0944308
ACTA1	5.35903	5.28339	4.56203	6.06631	4.28373	4.60575	6.32862	3.78557	4.26082	5.21887	6.09291	3.83428	4.8845	5.58809	5.29301	5.88834	5.23818	5.45019	5.86571	5.55101	4.79581	5.35337	4.68769	6.08923	5.86374	5.83846	5.69405	4.88485
ACTA2	0.607856	0.404749	0.671805	0.642677	0.353906	0.375337	0.852933	0.423932	0.5531	0.483907	0.747282	0.506137	0.615034	0.57905	0.618977	0.605895	0.605394	0.558013	0.735424	0.532057	0.745489	0.815598	0.827284	0.794908	0.630725	0.811263	0.744249	0.7335
ACTB	-0.916413	-0.66699	-0.721567	-0.656242	-0.724655	-0.893039	-0.328287	-0.799795	-0.548691	-0.38322	-0.97405	-0.405088	-0.339703	-0.608805	-0.231872	-0.254205	-0.289352	-0.496427	-0.0394122	-0.501732	-0.570656	-0.303412	-0.408941	-0.362573	-0.331753	-0.371516	-0.248792	-0.504371
ACTC1	0.660975	0.579527	0.740898	0.501447	0.697577	0.662552	0.53974	0.204964	0.487852	0.624279	0.676693	0.641811	0.393493	0.629105	0.470056	0.426619	0.419172	0.358365	0.217993	0.490666	0.59248	0.503391	0.533741	0.846324	0.416881	0.570254	0.661356	0.496899
ACTG1	-1.305	-0.573554	-1.13122	-0.70728	-1.21281	-1.39415	-0.35491	-1.21932	-1.42164	-0.745429	-0.460321	-1.62844	-1.09426	-1.13041	-1.28122	-1.03927	-1.23083	-1.13136	-0.802871	-0.947711	-1.34569	-1.1605	-1.43711	-1.44247	-1.28555	-1.15124	-1.00133	-1.10966
ACTG1P17	-0.19344	0.0427647	-0.0151859	-0.264689	0.234801	-0.260454	-0.189809	-0.123012	-0.111658	-0.120657	-0.174121	-0.305842	-0.321884	-0.30356	-0.322508	-0.248181	-0.634767	-0.349306	-0.441974	-0.388353	-0.291027	-0.383726	-0.41655	-0.481654	-0.319864	-0.289754	-0.210642	-0.3042
ACTG2	3.38904	3.10256	3.20523	3.51219	3.13295	3.23589	3.91029	2.94931	2.98275	3.26934	3.66307	2.62232	2.84034	3.53995	3.46416	3.41983	3.20369	3.25889	3.49475	3.82137	2.67832	3.37175	2.70776	3.55777	3.15786	3.10816	3.2545	2.89972
ACTL6A	0.0460306	0.107757	-0.115255	-0.238487	-0.242368	-0.396012	-0.0262919	-0.227722	-0.276828	0.310631	0.360972	-0.300503	0.0135884	-0.139065	-0.0590459	-0.0491196	-0.681429	-0.287538	-0.195855	-0.377794	-0.243485	-0.157157	-0.368942	-0.307957	-0.823612	-0.191414	-0.295598	-0.319985
ACTL6B	0.342051	-0.0133858	0.104068	0.177292	-0.00162751	-0.0150938	0.548784	-0.113371	0.0418014	0.416621	0.400366	0.0749498	-0.000147422	0.471333	0.164009	0.3622	-0.0806746	0.0419972	0.244955	0.286742	-0.265977	0.519212	0.244831	0.46691	0.211776	0.146939	0.454153	0.216126
ACTL7A	1.12527	1.1009	1.15697	1.60692	0.999265	1.11484	1.65554	0.8768	1.12413	1.2661	1.65583	0.922711	0.98003	1.36252	1.06323	1.22005	1.03894	0.973379	0.954401	1.21347	1.03534	0.967467	1.0612	1.28401	0.89635	0.988496	1.32817	1.29182
ACTL9	0.242879	0.028083	0.322158	0.327243	0.165228	0.490393	0.116788	0.566116	0.112054	0.55542	0.261529	0.149944	0.15719	0.0353845	0.36091	0.130987	0.233397	0.138333	0.513899	0.122979	0.0394294	-0.148488	0.19594	0.283733	0.271896	0.318076	0.221815	0.237296
ACTN2	0.949515	1.8859	1.29561	1.93473	0.159046	0.791476	2.25941	0.682165	1.14172	1.18759	2.18899	0.717806	1.34766	1.57934	1.44248	2.06049	1.53062	1.51768	2.00564	1.70151	1.08462	1.53229	1.72996	2.0064	2.02505	2.3055	2.33101	2.23893
ACTN3	0.497558	0.343867	0.630392	0.508118	0.692887	0.432353	0.493117	0.200718	0.444838	0.25771	0.260089	0.237487	0.127138	0.21084	0.229504	0.345796	0.329277	0.197446	0.286817	0.322692	0.678884	0.254963	0.35832	0.380069	0.425701	0.235557	0.249872	0.491967
ACTN4	-0.62764	-0.623798	-0.712095	-0.579014	-0.651647	-0.707295	-0.644643	-0.554493	-0.812146	-0.697823	-0.732678	-0.537248	-0.657302	-0.575167	-0.510256	-0.703835	-0.494787	-0.422736	-0.632208	-0.695066	-0.669935	-0.588327	-0.523001	-0.58912	-0.526125	-0.514484	-0.461444	-0.608252
ACTR10	-0.198806	-0.305835	-0.0273273	0.0672332	-0.0963114	-0.213045	-0.0893933	0.0350385	-0.112233	-0.0595467	-0.0125189	-0.0753972	-0.0287839	-0.192671	-0.139437	-0.104808	0.0983174	-0.0663119	-0.0430352	-0.0887062	-0.0344239	-0.0918296	0.0822605	0.173725	-0.010747	-0.0387953	0.111741	0.247188
ACTR1B	-0.961393	-0.877489	-0.941043	-0.88898	-0.853164	-0.894255	-0.917427	-0.818132	-1.18701	-0.79387	-0.884488	-0.7703	-0.998145	-0.615187	-0.591568	-0.742817	-0.60256	-0.641996	-0.634227	-0.8278	-0.834844	-0.830319	-0.723428	-0.918038	-0.881193	-1.01848	-0.708903	-0.955575
ACTR2	-1.35117	-1.15307	-1.17459	-1.11538	-1.23723	-1.14931	-0.911442	-0.930442	-1.22951	-0.760727	-0.919595	-1.18054	-0.913896	-0.86451	-0.74992	-0.677376	-0.723899	-0.83333	-0.60182	-0.700481	-0.734541	-0.663055	-0.672531	-0.826817	-0.544872	-0.60372	-0.746724	-0.650913
ACTR3	-0.317847	-0.177535	-0.329053	-0.345465	-0.438082	-0.380971	-0.283269	-0.269068	-0.37127	-0.26638	-0.306362	-0.33693	-0.305634	-0.305418	-0.223762	-0.233046	-0.257871	-0.176009	-0.248725	-0.279947	-0.297794	-0.12518	-0.203497	-0.218917	-0.129572	-0.0614507	-0.251335	-0.182957
ACTR3B	0.295338	0.200424	0.00463012	0.161965	0.274845	0.252851	0.246398	0.196706	0.320961	0.162288	0.165468	0.290431	0.183906	0.316438	0.0978784	0.252847	0.190034	0.157637	0.16682	0.304348	0.117804	0.241461	0.0245415	0.074709	0.150552	0.0928777	0.0849568	-0.0508945
ACTR5	-0.247373	-0.0789147	-0.310663	-0.228417	-0.411529	-0.409038	-0.452481	-0.252012	-0.302844	-0.172187	-0.287509	-0.13191	0.0781137	-0.421972	-0.45779	-0.300162	-0.343793	-0.417805	-0.260697	-0.560409	-0.165921	-0.120237	-0.216912	-0.622588	-0.357405	-0.145607	-0.270467	-0.438767
ACTR6	-0.37293	-0.405072	-0.150688	-0.336191	-0.396979	-0.239545	-0.336876	-0.239334	-0.446842	-0.480467	-0.577964	-0.439331	-0.658543	-0.424987	-0.511306	-0.521195	-0.557641	-0.681099	-0.639616	-0.366163	-0.370937	-0.43877	-0.458642	-0.636724	-0.356519	-0.606711	-0.554126	-0.309675
ACTRT1	2.03523	1.73945	1.87079	2.73304	1.58319	1.47724	2.79615	1.20408	1.47685	1.72329	2.42851	1.05698	1.5308	1.89852	1.95453	2.12783	1.76021	1.57991	2.29695	1.91914	1.88654	1.66096	2.21693	2.51677	1.34724	1.92952	3.05697	1.88209
ACTRT3	-0.420715	-0.302345	-0.496103	-0.401884	-0.285652	-0.469429	0.191103	-0.277479	-0.187846	0.067218	-0.0143559	-0.200676	0.197234	0.124628	0.0223426	-0.169555	0.362893	0.151323	-0.15873	-0.27434	0.252964	-0.121433	0.0397002	0.120146	0.244957	0.0356039	0.153853	0.139235
ACVR1	-0.664782	-0.356543	-0.245837	-0.327816	-0.32874	-0.442735	-0.486757	-0.209962	-0.622595	-0.385626	-0.40669	-0.425506	-0.409852	-0.544366	-0.276999	-0.293176	-0.521037	-0.291466	-0.0706644	-0.411545	-0.317507	-0.224595	-0.209709	-0.337568	-0.239611	-0.178671	-0.288161	-0.146532
ACVR1B	0.104148	0.218535	0.205251	-0.0691153	0.10657	0.0218174	0.107987	-0.068585	0.209014	0.267661	0.155044	0.059939	0.101738	0.13282	0.214359	0.0456912	0.195746	0.195764	0.242901	0.111438	0.010741	0.182938	0.443772	0.593078	0.144374	0.110798	0.206237	0.0222214
ACVR2A	0.0960712	0.145024	0.190508	0.263944	0.0916202	0.118284	0.157346	0.247185	0.108813	0.0769768	0.154786	0.0847789	0.207148	0.322696	0.173028	0.156987	0.436299	0.177258	0.233912	0.205495	0.131762	-0.0298853	0.00671529	-0.0905743	0.0508467	0.15502	0.369394	-0.0596522
ACVR2B	-1.0843	-0.72571	-0.937606	-0.742033	-0.785949	-0.769379	-0.669082	-0.648775	-0.541511	-0.51942	-0.790752	-0.486283	-0.533456	-0.238038	-0.545531	-0.416956	-0.486817	-0.41024	-0.338515	-0.337318	-0.513704	-0.239556	-0.37221	-0.0567381	-0.248925	-0.192927	-0.352465	-0.249353
ACVRL1	-0.282551	-0.397834	-0.496934	-0.371907	-0.399611	-0.494202	-0.541171	-0.440974	-0.589181	-0.425674	-0.643033	-0.155814	-0.555345	-0.390728	-0.150591	-0.448143	-0.412948	-0.487997	-0.31575	-0.427686	-0.517495	-0.378513	-0.500382	-0.253131	-0.363361	-0.311402	-0.344411	-0.362998
ACY1	0.0321677	-0.395797	-0.40645	0.024067	-0.393957	-0.167277	-0.283418	-0.0313468	-0.025634	-0.0153745	-0.304302	-0.166545	-0.332869	-0.0899416	-0.393968	-0.00267094	-0.170839	-0.10682	0.112659	-0.324205	-0.409075	-0.187994	0.0292798	-0.432347	-0.121703	-0.132133	-0.339071	-0.208781
ACY3	0.728892	0.626992	0.852234	0.542311	0.657088	1.01256	0.806244	0.892605	1.4575	1.20926	1.0045	1.22294	1.28186	1.45257	0.827011	0.526121	0.912559	1.08928	0.694757	0.990593	0.996939	1.03643	0.923843	0.976704	0.7397	0.642047	0.638405	0.555996
ACYP1	-1.0914	-1.10699	-0.889516	-1.04576	-0.767995	-0.550935	-0.786109	-0.600064	-0.614899	-0.7091	-0.611837	-0.488523	-0.420253	-0.723529	-0.482593	-0.571706	-0.962551	-0.988361	-0.864972	-1.04688	-0.767155	-0.413581	-0.610425	-0.750062	-0.850867	-0.704064	-0.816224	-0.853249
ACYP2	1.31776	0.665623	0.894379	1.32041	0.650447	1.10133	0.868088	1.07319	1.12654	0.908296	0.995592	0.691569	0.872224	1.05296	0.505688	0.903425	1.27101	1.09408	1.05917	0.90215	0.816267	1.10512	0.954203	0.908524	0.973332	0.996967	0.659342	0.947048
ADA	-0.195386	0.0947955	0.329887	-0.0897302	0.46522	0.232214	-0.0078945	0.22042	-0.00554752	-0.208456	0.028305	-0.00074931	0.10716	-0.122968	-0.118156	0.145459	-0.0301327	-0.00629985	0.0557986	0.11311	-0.00298633	-0.0232242	0.189506	-0.0483349	0.183438	-0.110878	-0.0776918	-0.0864377
ADAL	-0.187751	-0.332081	-0.338792	-0.347699	-0.391753	-0.260624	-0.449151	-0.317342	-0.491553	-0.290646	-0.531865	-0.17088	-0.257591	-0.39445	-0.0175238	-0.12718	-0.233443	-0.196389	0.0065509	-0.282322	-0.22973	-0.211807	-0.338256	0.191154	-0.221598	-0.182048	-0.10688	-0.32106
ADAM10	0.51774	0.533044	0.480262	0.584694	-0.362878	-0.329703	0.473662	-0.170236	0.352184	0.305173	0.194696	0.238766	0.484316	0.443568	0.336152	0.275933	0.37944	0.307894	0.281671	-0.0123894	0.337349	0.338378	0.249249	-0.036748	0.346218	0.501911	0.126655	0.345933
ADAM11	0.660557	0.790932	0.828819	0.443527	0.478539	0.697383	0.681801	0.642693	0.758915	0.573432	0.685702	0.5155	0.367108	0.24833	0.480041	0.576945	0.188962	0.417379	0.46952	0.211088	0.469922	0.44166	0.548347	0.524919	0.417799	0.262305	0.36793	0.535738
ADAM12	-0.105493	-0.15679	-0.138101	-0.147142	-0.0680643	-0.153526	-0.170804	-0.248548	-0.264572	-0.262617	-0.251366	-0.307626	-0.279024	-0.228638	-0.178066	-0.223559	-0.206361	-0.165109	-0.168424	-0.223882	-0.185288	-0.202121	-0.368255	-0.342382	-0.213248	-0.194084	-0.213305	-0.202551
ADAM15	0.515244	0.564005	0.330404	0.277953	0.369878	0.588264	0.390318	0.347269	0.411849	0.39134	0.379395	0.3092	0.16331	0.398857	0.346595	0.272656	0.305746	0.319171	0.252312	0.263717	0.332407	0.316754	0.380636	0.382381	0.166684	0.296799	0.131365	0.243676
ADAM18	-0.027926	0.26147	0.192793	0.153496	0.136308	0.198048	0.126021	-0.0183289	0.184126	0.0693209	0.298204	0.118719	0.337369	-0.0428371	0.164918	0.154061	0.145016	0.282519	0.0561838	0.058303	-0.137685	0.0220506	-0.140808	0.15862	-0.269318	0.191515	0.369994	-0.0357108
ADAM19	0.0374397	0.630183	0.542285	0.352894	0.388689	0.558275	0.632541	0.58062	0.37084	0.528148	0.601763	0.521447	0.45727	0.40204	0.341316	0.458294	0.453389	0.422891	0.660624	0.433197	0.485951	0.312498	0.392084	0.538245	0.453552	0.515621	0.421301	0.305593
ADAM20	0.320905	0.113109	0.2475	0.33318	0.168791	0.262015	0.11579	0.306983	0.187632	0.0972905	0.112135	0.473386	0.248913	0.213823	0.226014	0.0711096	0.0782933	0.08869	0.109887	0.19306	0.165988	0.082314	0.317143	-0.0855117	-0.0737139	0.0926463	0.199774	0.202759
ADAM21	-0.445208	-0.302162	-0.204382	-0.596286	-0.384576	-0.531934	-0.510448	-0.561618	-0.442233	-0.594219	-0.577692	-0.453891	-0.490911	-0.506849	-0.405069	-0.315391	-0.492964	-0.51193	-0.203695	-0.511251	-0.316275	-0.249722	-0.323283	-0.637418	-0.314341	-0.463157	-0.29499	-0.463207
ADAM22	-0.0420874	-0.109303	-0.196284	-0.296528	-0.110821	0.041414	-0.111145	-0.100225	-0.181952	-0.00752249	-0.0345541	-0.0150052	-0.0786616	-0.0700609	-0.11677	-0.0124467	-0.31027	-0.174603	-0.181491	-0.145051	-0.0944192	-0.0536204	-0.0548378	-0.205575	-0.189839	-0.251685	-0.259624	-0.237493
ADAM23	0.279545	0.15432	0.21683	0.260438	0.303376	0.328186	0.0377716	0.330644	0.616093	0.396303	0.447788	0.360663	0.312697	0.464616	0.411578	0.236527	0.522714	0.467177	0.416789	0.573007	0.522828	0.760723	0.446301	0.784759	0.606462	0.231333	0.192785	0.537673
ADAM30	0.0941988	0.0505653	0.273588	0.276401	0.183493	0.14259	0.186934	0.28042	0.15015	0.147051	0.197312	-0.0153696	0.0449602	0.149132	0.100648	0.0144304	0.1184	0.0194047	0.0127205	0.166657	0.0916869	-0.00683469	0.117321	-0.0716763	-0.1326	-0.0249517	-0.0331019	-0.071236
ADAM33	-0.990477	-0.719176	-0.833465	-0.593304	-0.747416	-0.702815	-0.620806	-0.604344	-0.885309	-0.886626	-0.846729	-0.905524	-0.781874	-0.713648	-0.54049	-1.07713	-0.67012	-0.72728	-0.896758	-1.2721	-0.940321	-0.787683	-0.76324	-0.77313	-0.811609	-1.11007	-0.850602	-0.809284
ADAM3A	0.0549706	0.123045	0.128648	0.198745	0.227553	0.216134	0.0858003	0.0727142	0.363649	0.137079	0.149781	0.0775574	-0.152752	-0.15498	0.0866917	0.0731415	-0.20598	0.174875	0.00659512	-0.0609917	-0.0520983	-0.207447	0.0929964	0.22334	-0.0265929	-0.167258	0.164835	0.0766136
ADAM5	-0.0841006	0.0530541	-0.00276876	0.107995	0.225725	0.0695659	-0.0186151	0.097481	0.0955396	0.011128	0.0776702	-0.130525	-0.113132	-0.0475516	-0.0544058	-0.170732	-0.13726	-0.15823	-0.0706442	-0.138023	-0.109795	-0.024299	-0.169979	-0.197665	-0.0363108	-0.102765	0.0177542	-0.121308
ADAM6	-0.133061	-0.107044	0.0819062	-0.30393	-0.593718	-0.288197	-0.364326	-0.293165	-0.460523	-0.218977	-0.327903	-0.29461	-0.310681	-0.637624	-0.189682	-0.348517	-0.0608053	-0.452687	-0.416674	-0.634683	0.0756029	-0.0541273	-0.197052	-0.353919	-0.10071	-0.0945906	-0.104263	-0.0837729
ADAM7	0.117339	0.0797254	0.208892	-0.0867257	0.152472	-0.0194815	-0.0548508	0.0385088	-0.0961755	0.0738868	-0.00342736	-0.102007	-0.151587	0.0624319	-0.0138558	0.0346033	-0.0751838	-0.0713567	-0.0936686	-0.0315594	-0.0109526	0.125199	-0.0615957	-0.0694852	-0.031606	-0.108767	-0.0870391	-0.0608889
ADAM9	-0.193517	-0.383465	-0.113914	-0.0203489	-0.39004	0.0145553	-0.218891	-0.150173	-0.19229	0.113268	-0.288256	-0.130584	-0.0648939	-0.0417063	-0.177065	-0.16261	-0.041585	-0.150996	-0.226412	-0.2246	-0.132342	0.0493715	-0.0905616	-0.268356	-0.125709	-0.182642	-0.310458	-0.181173
ADAMDEC1	-0.123969	-0.0557526	0.066433	0.099082	-0.012174	-0.0486719	-0.0515459	-0.0858881	-0.135443	-0.10922	0.0324233	-0.133893	-0.0643837	-0.22665	-0.186223	-0.232215	-0.0394326	-0.112094	-0.172732	-0.0971094	-0.0608835	-0.185779	-0.168792	-0.165127	-0.221257	-0.136628	-0.239338	-0.00346552
ADAMTS1	-0.624768	-0.30307	-0.841839	-0.84434	-0.932867	-0.844441	-0.207564	0.130245	-0.0757902	-0.372626	-0.698524	-0.941221	-0.523093	-0.1196	0.00808125	-0.948323	-0.584268	-0.345437	-0.0763692	-0.5601	-0.409063	-0.238284	-0.739208	-0.596449	-0.778341	-0.131894	-0.0738212	-0.294153
ADAMTS10	0.623312	0.398324	0.472007	0.444003	0.388291	0.500749	0.564507	0.584369	0.525023	0.603897	0.605929	0.415335	0.444504	0.566228	0.44804	0.428956	0.42002	0.357038	0.366209	0.426141	0.499411	0.446809	0.51989	0.487727	0.472469	0.381221	0.402103	0.282649
ADAMTS12	-0.00895337	0.240527	0.208297	0.20565	0.053106	0.0291119	0.114014	0.0970844	0.148726	0.0400843	0.121111	0.233194	-0.0188926	0.139246	-0.04446	-0.0185251	0.276058	0.165655	0.0588919	0.157983	0.135046	0.0539132	0.116787	0.111917	0.0704318	0.0580752	-0.035827	0.0820849
ADAMTS13	-0.0906422	0.145354	0.185304	0.106288	0.206115	0.223566	0.234946	0.148916	0.608081	0.120393	0.189509	0.385175	0.380338	0.110167	0.233056	0.147983	0.261236	0.290842	0.265983	0.272925	0.171795	0.141519	0.28185	0.348086	-0.0841464	0.29014	0.321892	0.205222
ADAMTS14	-0.0664478	-0.0956849	0.0328258	0.209832	-0.214362	-0.198207	0.0509663	0.00423314	-0.0702435	0.0733703	-0.0296429	-0.0319453	-0.130567	0.00116891	-0.0564977	0.0777116	-0.199622	-0.115521	-0.00949638	0.00503993	-0.14242	-0.00256775	-0.0397293	-0.0999962	0.0637458	-0.0626091	-0.0753917	0.0815455
ADAMTS16	0.306032	0.191093	0.296708	0.0859305	0.444073	0.388535	0.213006	0.103752	0.198946	0.217669	0.161144	0.143014	0.170344	0.192358	0.185877	0.218208	0.135392	0.0966288	0.313654	0.240151	0.195913	0.179664	0.0587289	0.207819	0.100138	0.147595	0.193579	0.168008
ADAMTS17	-0.00725993	-0.0290773	-0.183054	0.0285504	-0.106787	-0.105237	0.0804028	-0.0233369	-0.0694111	-0.0289663	0.14446	-0.0585682	-0.0118943	-0.0620015	0.0257041	0.00200377	-0.00888218	0.0591485	-0.0840066	-0.00603251	0.0946266	0.00231837	0.0710136	-0.0188738	0.0493241	0.0379064	-0.0423074	-0.0381348
ADAMTS18	-0.37572	-0.294932	-0.354205	-0.281473	-0.211022	-0.340448	-0.286809	-0.32179	-0.188566	-0.23114	-0.216221	-0.310783	-0.295368	-0.229944	-0.362972	-0.437462	-0.373323	-0.3615	-0.28594	-0.348243	-0.250694	-0.356067	-0.305204	-0.421018	-0.297142	-0.381018	-0.353106	-0.298531
ADAMTS19	-0.295779	0.0392336	-0.0150908	-0.238085	-0.207693	0.0808124	-0.151202	-0.256785	-0.0170655	-0.0776249	-0.369544	-0.131257	-0.0648455	-0.0414172	-0.0497035	-0.302783	-0.053656	-0.153353	0.0114065	-0.186081	-0.167945	-0.0557187	-0.315451	-0.193266	-0.0807363	-0.100584	0.0413146	-0.160983
ADAMTS2	-0.345717	-0.093727	0.0901775	0.281788	0.201993	0.0593889	0.225816	0.207756	0.00464947	0.00697883	0.0959569	-0.0164961	-0.0389051	0.0322406	-0.0159762	-0.0419863	0.00140399	-0.0827065	0.0652648	0.0829686	0.0830452	-0.090412	-0.0532717	-0.102955	-0.0598657	-0.0835807	-0.0983369	0.0765073
ADAMTS3	0.0389983	0.108421	0.106199	0.155695	0.156171	0.130394	-0.0750261	0.130168	0.038341	-0.106192	-0.00919384	0.062927	0.0534358	-0.114514	0.11045	0.0171451	-0.261724	-0.11549	0.0477877	0.0881237	0.0369495	-0.135786	-0.0154851	-0.0405446	-0.142507	-0.13473	-0.104644	-0.154875
ADAMTS5	-0.42174	-0.228582	-0.0989446	-0.328318	-0.41529	-0.442075	-0.456728	-0.215883	-0.386172	-0.347522	-0.449788	-0.310696	-0.407241	-0.234098	-0.244449	-0.27692	-0.30956	-0.314375	-0.376886	-0.216166	-0.147451	-0.20901	-0.295868	-0.484942	-0.362373	-0.385756	-0.314965	-0.247849
ADAMTS6	-0.0764426	-0.0659844	0.00676565	0.126859	-0.216034	-0.0182698	0.0403806	-0.0169648	0.0750697	-0.165787	0.0901318	-0.089871	-0.0603635	-0.207889	-0.0856744	-0.124822	0.00462428	-0.208268	-0.0312437	-0.0779752	-0.0356711	-0.155808	-0.0475542	-0.142558	-0.0967611	-0.0267551	-0.128184	0.103276
ADAMTS8	0.0945551	0.0467234	0.0642672	0.0428077	0.00949769	0.112655	0.235843	0.270928	-0.0525487	0.0610847	0.169021	-0.107066	-0.0464193	-0.00154157	0.184691	0.241166	0.162076	0.0573406	0.236127	0.0948514	0.0480073	0.0182529	0.159154	0.147416	0.116243	0.0509079	0.136998	0.127203
ADAMTS9	0.501778	0.363797	0.178813	0.356777	0.231454	0.20247	0.467437	0.25081	0.19212	0.234453	0.244566	0.230922	0.272742	0.33216	0.308068	0.136753	0.194309	0.155694	0.120869	0.173607	0.0552205	0.0479341	0.0256802	0.128899	0.0231291	0.0917277	0.132127	-0.00552314
ADAMTS9-AS1	0.196123	0.39261	0.62769	0.663183	0.595509	0.512914	0.451677	0.43688	0.640015	0.237176	0.243956	0.490183	0.561788	0.534544	-0.269277	-0.000147854	0.134535	0.148326	0.0589177	-0.00755635	0.163483	0.254802	0.289874	0.179717	0.217147	0.097667	0.207526	0.224867
ADAMTSL1	0.193167	0.213819	0.137187	0.0714865	0.0936475	0.129857	0.160534	0.312082	-0.0381024	0.198897	0.119428	-0.124094	-0.0666514	-0.226469	0.245995	0.318994	0.250854	0.170958	0.110709	0.175284	0.323275	0.178298	0.099854	0.0937024	0.340148	0.209328	0.142596	0.0974204
ADAMTSL2	-0.958335	-0.729799	-0.723878	-0.849742	-0.8436	-0.911195	-0.781171	-0.756198	-0.738436	-0.637125	-0.624331	-0.791711	-0.51458	-0.487615	-0.540892	-0.867051	-0.417782	-0.707024	-0.713289	-0.66739	-0.646224	-0.526175	-0.673433	-0.578077	-0.653071	-0.542386	-0.616059	-0.450245
ADAMTSL3	0.319787	0.462833	0.60276	0.429126	0.285353	0.515573	0.572232	0.564863	0.678216	0.647978	0.518821	0.562709	0.519212	0.869583	0.545186	0.474873	0.70346	0.550755	0.73513	0.195054	0.173412	0.692702	0.170772	0.639425	0.517863	0.434278	0.103327	0.59053
ADAMTSL4	0.620941	0.674976	0.702057	0.639011	0.355378	0.445454	0.625959	0.56705	0.658017	0.605794	0.78407	0.876665	0.867683	0.549423	0.865272	0.78769	0.811223	0.836025	0.767511	0.774331	0.578496	0.641079	0.830686	1.08808	0.550775	0.764662	0.68274	0.519813
ADAMTSL5	-0.203075	-0.194219	-0.224316	0.117387	-0.184052	-0.22598	-0.160211	-0.0840117	-0.0468733	-0.0811378	0.0401908	-0.359062	-0.388464	-0.307252	-0.210837	-0.392517	0.0865087	-0.0634375	-0.0306785	-0.0471953	-0.0790835	-0.0543696	-0.117771	-0.0025347	0.0947762	0.0147369	0.0538747	0.157892
ADAP1	0.284706	0.16681	0.264871	0.161884	0.486469	0.370704	0.102572	0.259467	0.243647	-0.0377036	0.197317	0.116104	0.0561139	0.118533	0.128151	0.115382	-0.096606	-0.0391428	0.0276344	0.210888	0.165817	0.054464	-0.000566412	0.0812256	0.0629427	-0.0543893	-0.158706	0.0287058
ADAP2	0.777913	0.467429	0.361369	0.244704	0.454488	0.617077	0.617683	0.564686	0.549357	0.763984	0.502904	0.582923	0.303591	0.500728	0.358118	0.455026	0.372752	0.317794	0.352518	0.62265	0.504751	0.43088	0.438966	0.485232	0.266514	0.323533	0.677188	0.189651
ADARB1	0.53129	0.0252425	0.501021	-0.310903	0.186113	-0.0765371	-0.287471	-0.297913	-0.327844	0.0326008	0.227208	-0.0705697	0.00867625	0.00384936	-0.0983068	-0.573569	0.135053	-0.227146	0.113601	0.365307	0.0014798	0.244109	-0.480915	0.0345481	-0.099008	0.00753527	-0.0596255	0.194438
ADARB2	0.316348	0.265985	0.225534	0.245064	0.178977	0.303897	0.275672	0.140505	0.251994	0.189653	0.184542	0.237986	0.213798	0.210782	0.181664	0.20089	0.129399	0.116562	0.122564	0.0820089	0.148395	0.0805324	0.121471	0.0393378	0.0837077	0.0330736	0.0562047	0.0349115
ADAT2	-0.482731	-0.185894	-0.226874	-0.410441	-0.601239	-0.574768	-0.384765	-0.544658	-0.330679	-0.248046	-0.291439	-0.413582	-0.350974	-0.528146	-0.0793022	-0.523038	-0.127527	-0.328735	-0.276508	-0.425443	-0.232558	-0.309548	-0.512734	-0.769419	-0.236502	-0.100775	-0.0835864	-0.195296
ADAT3	-0.863201	-0.727589	-0.467203	-0.801189	-0.775635	-0.898449	-0.704188	-0.574845	-0.770251	-0.586425	-0.66115	-0.552485	-0.531559	-0.404008	-0.732261	-0.79603	-0.661029	-0.657309	-0.791378	-0.70636	-0.824114	-0.647829	-0.945969	-1.02773	-0.789923	-0.943383	-0.82653	-0.701618
ADCK1	0.207288	-0.0102385	0.173534	0.0320848	0.0408338	0.159738	0.0114913	0.204015	0.287347	0.00473626	0.306348	0.198426	0.288401	0.298508	0.274168	0.0687603	0.0991737	0.261961	0.271084	-0.0117869	0.191891	0.168439	0.00816274	-0.163724	0.117708	0.156554	0.108126	0.229859
ADCK2	-0.644205	-0.589635	-0.43597	-0.334199	-0.598231	-0.407867	-0.457785	-0.354687	-0.382374	-0.169639	-0.309317	-0.199878	-0.230211	-0.206136	-0.199525	-0.173879	-0.097381	-0.195719	-0.297558	-0.424963	-0.178423	-0.262862	-0.311456	-0.311292	-0.450456	-0.309638	-0.583449	-0.342786
ADCK5	-1.36178	-1.21264	-1.14171	-0.988282	-1.16889	-1.07216	-0.969542	-0.880733	-0.984545	-0.979114	-1.00495	-1.06851	-1.08421	-0.655128	-0.887886	-1.01269	-0.789145	-0.846451	-1.05259	-0.94834	-1.00325	-0.742813	-0.857055	-1.08545	-0.797012	-1.02356	-0.989534	-0.803147
ADCY1	-0.0683347	-0.231896	-0.00820373	-0.0612912	-0.306096	0.26062	-0.0721407	-0.00133816	0.546899	0.278594	0.13187	0.206648	0.315989	0.0607275	0.0725779	0.0101418	-0.169877	0.0117246	-0.0730536	-0.0393981	0.070102	0.0218972	-0.0132648	-0.254973	0.0712816	0.0402244	-0.0752753	-0.161119
ADCY10	0.392158	0.449965	0.27205	0.248749	0.300219	0.466548	0.389833	0.268265	0.772213	0.184571	0.313874	0.401804	0.271572	-0.106503	0.309058	0.240794	0.225885	0.0354044	0.257689	0.329853	0.183421	0.282499	0.440864	0.128117	0.0241431	0.208994	0.34754	0.413793
ADCY2	-0.247694	-0.169241	-0.168054	-0.183627	-0.14671	-0.144971	-0.0321809	0.0887206	-0.159907	-0.0377663	-0.0758102	-0.168499	-0.128113	0.00477284	-0.0532788	-0.217846	-0.0489553	-0.152726	-0.118319	-0.082494	-0.126783	-0.0871214	-0.0273071	-0.169199	-0.144928	-0.188296	-0.111372	-0.173294
ADCY3	-0.436462	-0.357344	-0.39541	-0.425382	-0.407806	-0.512636	-0.327583	-0.277823	-0.474039	-0.322836	-0.43092	-0.249038	-0.296396	-0.204658	-0.271094	-0.287381	-0.240748	-0.246568	-0.14128	-0.435468	-0.246502	-0.178081	-0.352198	-0.299169	-0.260949	-0.269982	-0.325792	-0.3027
ADCY4	-0.273241	-0.172136	-0.197891	0.0466315	-0.055496	0.0366276	0.213169	0.23719	-0.0828828	0.139753	0.0323259	0.245773	0.291033	0.302288	-0.0143076	0.0659286	0.17786	0.0878684	0.235628	0.329108	-0.0488481	-0.0101851	0.0311953	0.30949	0.0461474	0.0486098	-0.0111776	-0.0764313
ADCY5	-0.365361	-0.358546	-0.309619	-0.313578	-0.33113	-0.266556	-0.201449	-0.251177	-0.299858	-0.25611	-0.189088	-0.367151	-0.318389	-0.323076	-0.283771	-0.324749	-0.248506	-0.33241	-0.295521	-0.48034	-0.199542	-0.320721	-0.319477	-0.220197	-0.282767	-0.377325	-0.323729	-0.348748
ADCY6	0.531426	0.30676	0.547147	0.714674	0.12786	0.575192	0.355996	0.387747	0.758607	0.675859	0.599483	0.428796	0.668124	0.79735	0.504642	0.299828	1.01243	0.770964	0.704795	0.734505	0.717935	0.581097	0.916894	0.74061	0.48381	0.834178	0.621358	0.670596
ADCY7	0.126041	-0.0114084	-0.0682565	0.352456	0.356154	0.196179	0.156147	0.179065	0.195846	0.310819	0.281548	-0.124902	0.453132	0.44009	0.309306	0.244955	0.386641	0.27682	0.18904	0.330925	0.0373469	0.108926	0.0117258	0.000727113	0.229832	0.370544	0.175918	0.27124
ADCY9	-0.699432	-0.63724	-0.816037	-0.716677	-0.885197	-0.760249	-0.489691	-0.787711	-0.803733	-0.761859	-0.802761	-0.584874	-0.728792	-0.406099	-0.547722	-0.719283	-0.600969	-0.440377	-0.579724	-0.661489	-0.792215	-0.463516	-0.69111	-0.461033	-0.552512	-0.585793	-0.529626	-0.554609
ADCYAP1R1	-0.35131	-0.197442	-0.0201206	-0.279377	-0.14029	0.0744771	0.0908568	-0.268854	-0.134372	-0.286114	-0.207353	0.0312625	-0.155845	0.0653723	-0.251791	-0.148893	-0.23977	-0.324572	-0.285569	-0.216535	-0.182941	-0.1306	-0.347165	-0.618173	-0.225112	-0.144403	-0.414786	-0.300205
ADD2	-0.156268	-0.175874	-0.303199	-0.261822	-0.250995	-0.401566	-0.367193	-0.212945	-0.306498	-0.308882	-0.273733	-0.250872	-0.232716	-0.206674	-0.0860747	-0.309469	-0.223195	-0.173948	-0.251195	-0.201359	-0.20773	-0.19404	-0.189835	-0.317839	-0.259863	-0.225176	-0.227989	-0.318433
ADD3-AS1	-0.110782	-0.12374	0.0335354	-0.0838579	-0.0276354	0.183897	-0.467002	0.225635	-0.0465217	-0.0390282	0.0970512	0.105516	0.0177932	0.0264824	-0.0300333	0.111932	0.360126	0.251097	0.00304767	-0.00789194	-0.198754	0.153443	-0.0604268	0.124302	-0.178535	-0.182218	-0.0703768	-0.244737
ADGRA2	-0.0335875	0.0888985	0.101566	0.451332	0.109953	0.0764962	0.542343	0.254482	0.549261	0.257275	0.537058	0.176026	0.387571	0.591578	0.25561	0.449273	0.552711	0.392655	0.461135	0.476711	0.531035	0.578069	0.478817	0.579087	0.441598	0.664678	0.579954	0.725093
ADGRA3	-0.331293	-0.321431	-0.539711	-0.444956	-0.441289	-0.512543	-0.485977	-0.313715	-0.616082	-0.560039	-0.546756	-0.365691	-0.517427	-0.390068	-0.469237	-0.483729	-0.495093	-0.125457	-0.441827	-0.284985	-0.462337	-0.142856	-0.26124	-0.503229	-0.185247	-0.361771	-0.260124	-0.319646
ADGRB1	0.266867	0.109061	0.0444524	0.184916	0.239354	0.242999	0.14	0.376476	-0.0154936	0.0998875	0.11833	0.316808	-0.10068	0.156968	0.0671762	0.177953	0.0160509	0.0861297	0.104855	0.393431	0.131626	0.0255475	0.0433768	0.226099	0.0426698	0.000681758	-0.122311	-0.0339371
ADGRB3	-0.297012	-0.175021	-0.0934357	-0.0258092	-0.00798605	-0.101465	0.207492	-0.0906781	-0.168242	-0.209758	-0.220355	-0.119425	-0.258743	-0.236222	-0.103096	-0.134265	-0.0457411	-0.184417	-0.134758	-0.0683417	-0.13226	-0.15667	-0.15116	0.0797651	0.0462204	-0.117001	-0.148622	-0.194161
ADGRD1	-0.798231	-0.533358	-0.668483	-0.659525	-0.700176	-0.668726	-0.653673	-0.767753	-0.729222	-0.515762	-0.569733	-0.567733	-0.665975	-0.723213	-0.603047	-0.565151	-0.653761	-0.504544	-0.599276	-0.4487	-0.739404	-0.69242	-0.736484	-0.642221	-0.553701	-0.699669	-0.766834	-0.604559
ADGRE1	0.0249408	0.231811	-0.0167589	0.212541	-0.0768239	-0.0249394	0.0111926	-0.170453	-0.244453	0.0122807	-0.0292425	0.131876	-0.0585332	-0.0512656	-0.34027	0.00801133	0.039074	0.0220168	0.0447502	0.146198	0.258653	0.104208	0.0417997	-0.0943017	-0.0103565	0.209709	0.174246	-0.0403824
ADGRE3	-0.980907	-0.477724	-0.69468	-0.210385	-1.0137	-1.06558	-0.0400223	-0.84712	-0.725544	-0.479829	-0.28354	-0.727699	-0.438318	-0.314752	-0.402842	-0.439756	-0.305019	-0.357119	-0.138909	-0.415894	-0.35646	-0.329017	-0.440617	-0.126452	-0.43642	-0.377044	-0.156424	-0.0463467
ADGRF1	0.976248	1.00272	1.25248	0.642697	0.703675	0.849339	0.71495	0.710486	1.19095	0.935793	0.642492	1.09472	0.86786	0.950308	0.887191	0.768781	0.651751	0.779995	0.837751	0.899539	0.496135	0.437444	0.930953	0.649806	0.311191	0.6323	0.607427	0.375947
ADGRF3	0.151912	0.110603	0.233859	0.171653	0.174172	0.307531	0.159986	0.238125	0.370177	0.317004	0.198498	0.178028	0.225795	0.205648	0.128724	0.089788	-0.0420545	0.270585	0.0432176	0.107929	0.241175	0.30005	0.190046	0.220933	0.077322	0.192729	0.195023	0.245976
ADGRF4	-0.000692092	0.43327	0.423401	0.340689	0.11338	0.658006	0.248225	0.282492	0.557013	0.451315	0.517765	0.313577	0.379774	0.393561	0.33834	0.410333	0.294235	0.406505	0.420745	0.46085	0.311349	0.438152	0.359799	0.524854	0.301537	0.220834	0.180639	0.457224
ADGRG1	0.0335248	0.284001	-0.0938279	0.188208	-0.0689213	0.0156907	0.325239	-0.197709	0.279217	0.438839	0.240699	0.327411	0.292588	0.103677	0.167485	0.230169	0.42267	0.269693	0.0908074	0.258292	0.0459267	0.105519	0.0717801	0.120911	0.118747	-0.0482633	-0.034581	-0.0804679
ADGRG2	-0.000107103	-0.0146322	-0.0311144	-0.133406	-0.0190354	0.0277466	-0.113086	-0.0315255	-0.0972167	-0.0137097	-0.0448285	-0.00912635	-0.145264	-0.0333222	-0.0585675	-0.159108	-0.180934	-0.0956129	-0.144691	-0.225686	-0.0378918	-0.055614	-0.090654	-0.0919348	-0.0591745	-0.0564277	-0.0978647	-0.132657
ADGRG3	0.0737469	0.36043	0.0510304	0.633641	0.400426	0.259058	0.25272	0.314032	0.267357	0.162273	0.242999	0.398743	0.234904	0.490056	0.194565	0.395783	0.235923	0.327734	0.301642	0.353234	0.134616	0.293828	0.275718	0.304943	0.152679	0.277999	0.290252	0.152733
ADGRG5	0.560694	0.359395	0.31505	0.193924	0.073216	0.207133	0.329192	0.262649	0.382248	0.363484	0.236049	0.304614	0.49582	0.423977	0.363065	0.568728	0.341436	0.370842	0.498627	0.377366	0.547919	0.520945	0.484652	0.627829	0.341461	0.622505	0.333347	0.306254
ADGRG6	-0.43132	-0.425648	-0.457996	-0.392382	-0.451931	-0.382814	-0.347358	-0.332053	-0.439225	-0.526411	-0.535006	-0.416931	-0.482104	-0.37343	-0.19025	-0.494518	-0.400305	-0.562092	-0.64731	-0.394225	-0.794641	-0.480255	-0.459934	-0.603813	-0.336608	-0.426824	-0.236372	-0.48848
ADGRG7	-0.54284	-0.187793	-0.0711336	0.0589901	-0.172338	-0.390918	-0.220695	-0.237286	-0.368564	-0.274467	-0.284987	0.175649	-0.0906418	-0.208869	-0.196447	-0.422807	-0.126833	0.067491	0.161941	-0.0750846	-0.0100573	-0.315681	-0.1866	-0.124014	-0.412395	-0.239757	-0.151821	-0.196103
ADGRL1	0.311306	0.137636	0.257003	0.287073	0.299333	0.381247	0.27803	0.451408	0.578694	0.663906	0.263262	0.410959	0.406713	0.351332	0.529589	0.247943	0.467654	0.319643	0.398613	0.19918	0.419174	0.281715	0.0769399	0.250006	0.264046	0.326242	0.0829949	0.207995
ADGRL2	0.324743	0.0761123	0.222996	0.284227	0.17713	0.171581	0.376424	-0.000174747	0.336127	0.138134	0.218299	0.251226	0.0725177	0.104808	0.0869777	0.18526	0.198407	0.00288464	0.173976	-0.0174936	0.191384	0.207967	0.208405	0.109852	0.137912	0.220605	0.204771	0.0615195
ADGRL3	-0.104458	-0.108505	-0.0960625	-0.122655	-0.0862715	-0.101526	-0.118035	-0.193338	-0.168636	-0.293439	-0.0820923	-0.0596626	-0.0939042	-0.00442942	-0.0473697	-0.177016	0.00711784	-0.0547741	0.0803558	-0.0486662	-0.195652	-0.0606942	-0.0806791	-0.0203074	-0.147458	-0.0966655	0.13988	-0.0987548
ADGRL4	0.398873	0.507822	0.463819	0.292184	0.440731	0.576792	0.553614	0.368073	0.381895	0.322985	0.448741	0.273143	0.314313	0.36851	0.287321	0.206483	0.268341	0.234637	0.234055	0.281397	0.394185	0.330246	0.419432	0.602374	0.13494	0.163701	0.24402	0.222479
ADH1A	0.290266	0.060977	0.126255	0.314955	0.19761	0.0198927	0.311359	0.120619	0.0329462	0.000996048	0.177225	-0.124286	-0.0393609	-0.165559	0.00301813	-0.0191535	0.114127	0.0100173	-0.138067	0.00710318	0.0138078	0.0264629	0.00753274	0.0612376	-0.0466121	-0.0577809	0.0760827	-0.0107807
ADH1B	-0.128947	-0.211253	-0.143655	-0.232156	0.0561103	0.0846769	0.0482715	-0.0254825	-0.356988	0.0361566	-0.200849	0.00352871	-0.0426937	-0.0170423	-0.00903053	-0.179818	-0.0641181	-0.00458793	-0.145158	0.108556	-0.0236526	0.0336723	-0.0965559	-0.0126847	-0.089717	0.101681	0.244395	-0.0886007
ADH1C	0.302494	0.203362	0.61822	0.352155	0.54911	0.487544	0.304185	0.582364	0.469267	0.248883	0.16012	0.342376	0.204733	0.23975	0.496191	0.232322	0.370183	0.252768	0.200644	0.326294	0.439043	0.123132	0.204458	0.388042	0.246979	0.120594	0.0770854	0.345658
ADH4	0.167364	-0.150185	0.106938	-0.0888863	0.15344	0.0996402	0.0371771	0.171392	-0.0433178	-0.0701106	-0.164968	-0.0357671	-0.12873	0.0575658	-0.0323007	-0.0789781	-0.358216	-0.234612	-0.085663	0.00368488	0.0476191	-0.184762	0.0504766	-0.273693	-0.0942442	-0.295711	-0.0559241	-0.161024
ADH6	-0.898167	-0.769825	-0.708636	-0.618659	-0.463746	-0.645357	-0.628496	-0.506881	-0.764951	-0.546011	-0.644365	-0.691974	-0.51359	-0.444908	-0.254389	-0.484789	-0.515106	-0.578536	-0.457401	-0.56496	-0.183208	-0.235974	-0.430282	-0.595632	-0.193876	-0.487566	-0.311065	-0.557884
ADH7	-0.024553	0.213014	0.177253	0.346566	-0.0603671	0.177719	0.151288	0.0443359	0.460444	0.0909139	0.0245819	-0.133949	-0.116901	-0.0777219	0.125247	-0.130991	0.0136376	0.158067	-0.122459	-0.336049	-0.17926	-0.364759	-0.163788	0.113468	0.150644	0.231191	0.188475	0.0569708
ADHFE1	-0.459466	-0.379564	-0.332943	-0.3501	-0.263151	-0.358091	-0.508911	-0.273237	-0.277333	-0.253744	-0.340551	-0.209324	-0.238336	-0.021047	-0.205715	-0.094265	-0.17071	-0.0527426	-0.40594	-0.457341	-0.248396	-0.356143	-0.35346	-0.0574661	-0.209847	-0.296109	-0.495881	-0.377242
ADI1	-0.0502213	-0.0841736	-0.296436	0.25607	-0.155516	-0.0758129	0.266764	0.15285	-0.103821	-0.148822	-0.134769	-0.105869	0.0985463	-0.0739062	0.0170107	-0.105526	-0.1764	-0.126797	-0.116133	-0.0424273	0.0546976	0.0185316	-0.113988	-0.193865	-0.0268027	0.151491	0.201562	0.00500745
ADIPOR1	0.00895251	-0.0261162	0.0947353	0.212016	0.22514	0.0727247	0.12977	0.079857	0.0323653	-0.169638	0.290545	-0.0898772	-0.392627	-0.346021	-0.00260397	-0.162267	0.339257	0.145027	0.100731	-0.0402102	0.189022	0.00617699	0.0579039	-0.10023	-0.0275721	-0.0323007	0.0159194	0.117195
ADIPOR2	-0.50898	-0.411447	-0.444999	-0.370932	-0.385497	-0.371052	-0.62007	-0.380258	-0.766606	-0.522564	-0.45387	-0.506002	-0.384384	-0.565336	-0.209415	-0.346347	-0.555842	-0.387052	-0.462884	-0.384399	-0.404278	-0.346069	-0.262402	-0.524769	-0.319007	-0.285019	-0.463454	-0.528603
ADIRF	0.415828	0.309263	0.352837	0.255823	0.348819	0.325557	0.115444	0.694838	0.312056	0.34039	0.192151	0.37018	0.00999205	0.248709	0.0565476	0.0909699	0.247629	0.175019	0.0379315	0.065256	0.311089	0.358842	0.217602	0.585534	0.100848	0.157332	0.252589	0.347267
ADK	-0.610839	-0.437205	-0.329747	-0.389751	-0.483764	-0.384159	-0.399544	-0.364003	-0.46158	-0.416832	-0.481828	-0.402621	-0.335368	-0.493013	-0.354602	-0.38897	-0.347408	-0.461171	-0.452018	-0.427068	-0.488905	-0.363547	-0.401841	-0.39931	-0.42623	-0.362271	-0.392944	-0.355642
ADM	-0.19542	0.0505189	-0.201625	-0.37618	-0.337091	-0.270596	-0.23825	0.032247	0.0364337	-0.264649	-0.392964	-0.173329	-0.0330242	-0.249252	-0.251572	-0.0401409	-0.0532307	-0.044902	-0.250844	-0.0207496	0.200218	0.126066	0.326753	-0.0231968	0.0830515	0.164869	-0.0933385	-0.158815
ADNP	-0.30438	-0.176804	-0.239424	-0.105628	-0.145511	-0.176267	-0.224962	-0.147997	-0.191183	-0.138558	-0.166514	-0.229856	-0.0672114	-0.165038	-0.125299	-0.186337	-0.107058	-0.0424644	-0.0742941	-0.236609	-0.153998	-0.176714	-0.0549467	-0.221992	-0.0115858	-0.068012	-0.0257085	-0.0564013
ADNP-AS1	-0.299958	-0.376105	-0.27034	-0.487118	-0.507489	-0.439227	-0.364518	-0.457512	-0.595896	-0.527951	-0.322727	-0.23767	-0.256106	-0.397314	-0.0538533	-0.281946	-0.521033	-0.24534	-0.187962	-0.147614	-0.150814	-0.433176	-0.346114	-0.392105	-0.140862	-0.302937	-0.112099	-0.226818
ADNP2	0.143925	0.324904	0.245947	0.427238	0.18948	0.0154137	0.159831	0.0264536	0.282905	0.0624778	-0.0536991	-0.0888881	0.199955	-0.353437	-0.121562	-0.115065	0.0202885	-0.103267	-0.151524	-0.301151	-0.0502074	0.0621964	-0.0566591	-0.101059	-0.14567	0.000319243	0.0798069	0.0853084
ADO	-0.473588	-0.478613	-0.54458	-0.310325	-0.347626	-0.52911	-0.341398	-0.242697	-0.361173	-0.264957	-0.471625	-0.10471	-0.183609	-0.433423	-0.0574865	-0.169205	-0.15308	-0.285115	-0.395267	-0.285083	-0.36899	-0.0600231	-0.410338	-0.113744	-0.0992884	0.0642564	0.157255	-0.306763
ADORA1	0.112041	-0.0671174	-0.0316759	-0.220567	0.124042	-0.0631281	-0.0124394	-0.0134018	0.0551829	-0.0869121	0.0599993	0.172047	-0.132192	0.47967	-0.000960451	-0.0287806	-0.102281	0.113256	-0.0905808	-0.0344257	0.00211589	0.203065	0.276031	0.17669	-0.0689192	0.291144	0.210927	0.130382
ADORA2A	0.212336	0.178602	0.150157	0.0419201	0.119964	0.230746	0.0965334	-0.109566	0.362944	0.419761	0.167098	0.258245	0.196846	0.100657	0.346266	0.145743	0.316245	0.363622	0.210753	0.152968	-0.0197591	0.0434948	0.234776	0.146209	0.108809	0.0683906	-0.244918	0.0925607
ADORA2A-AS1	0.374904	0.257498	0.444052	0.414062	0.413161	0.414228	0.200891	0.353988	0.230445	0.301553	0.292727	0.273471	0.201001	0.218119	0.0683947	0.116648	0.0556213	0.149868	0.0322464	0.195608	0.165899	0.0967733	0.186567	0.0514551	0.0521069	0.00142877	-0.00160498	0.000939427
ADPGK	-0.144366	0.00323785	-0.0781736	-0.0442124	0.00561222	0.107527	-0.0288606	-0.0672168	0.0881124	0.0357529	0.167119	0.0118543	0.0540256	0.0577015	-0.0243247	-0.140262	-0.047846	-0.0219073	-0.0187568	0.0562504	-0.0844012	0.0275509	-0.107596	-0.0239955	0.0349585	-0.0910303	-0.0435391	-0.134111
ADPRH	0.129198	0.2438	0.304868	0.100669	0.309444	0.187568	0.168362	0.135363	0.318558	0.24701	0.253805	0.309301	0.268083	0.427572	0.174498	0.272738	0.293688	0.177496	0.158181	0.205174	0.358405	0.297625	0.420266	0.383398	0.440519	0.276548	0.334272	0.257539
ADPRHL1	0.0292375	-0.0694565	-0.166895	0.00519254	-0.155872	-0.0669206	-0.274471	-0.0887502	0.0588931	-0.22331	-0.25426	0.0414353	-0.0516569	0.0986853	0.103757	-0.0567396	0.0017611	-0.0100165	0.138585	0.106096	0.128972	0.245438	0.0114703	0.37705	0.107513	0.196182	0.223094	-0.000275637
ADPRHL2	-0.0655707	-0.0152769	-0.00756968	0.14026	0.0250778	0.0816089	0.0229902	-0.0664765	0.119516	0.0335241	-0.00469743	-0.00868226	0.0469846	-0.0734967	0.0790789	-0.0467965	0.0435392	-0.066844	-0.0471206	-0.141419	-0.0439396	-0.12682	-0.0612888	0.00276144	-0.150155	-0.107907	-0.196379	-0.155699
ADPRM	-0.0693215	-0.549859	-0.147191	-0.423574	-0.361298	-0.320544	-0.231573	-0.432052	-0.312626	-0.205097	-0.539203	-0.307843	-0.192554	-0.503681	-0.255152	-0.255767	-0.251472	-0.185725	-0.353417	-0.148454	-0.102465	-0.166755	-0.142634	0.0307731	-0.331897	-0.103442	-0.304295	-0.380142
ADRA1A	0.69268	0.19636	0.966153	0.856907	0.886083	0.935225	0.602102	-0.0103643	0.80332	0.297237	0.791653	0.981272	0.535108	0.879407	0.724226	0.463296	1.0422	0.404711	0.32996	0.670483	0.653531	0.57924	0.761126	1.40989	0.981652	0.640969	0.459318	1.65319
ADRA1B	0.674772	0.497406	0.422251	0.376365	0.388979	0.450349	0.455897	0.371185	0.690037	0.540485	0.451616	0.42081	0.647269	0.499066	0.410159	0.581538	0.551319	0.376499	0.556786	0.452781	0.562421	0.627828	0.53565	0.185165	0.585007	0.481993	0.321427	0.479438
ADRA1D	0.511802	0.183974	0.423518	0.0360347	0.518136	0.397205	0.279433	0.430865	0.546069	0.226985	0.142026	0.304764	0.277304	0.471077	0.592193	0.246863	0.394075	0.486222	0.247259	0.564334	0.553037	0.455399	0.330693	0.476921	0.425026	0.272552	0.30913	0.39061
ADRB1	1.36616	0.739429	1.17965	1.15644	1.18713	1.18415	0.912713	1.3353	1.04414	1.01024	1.05704	1.1778	1.02444	1.30006	1.26093	0.874231	1.30923	0.588981	0.74439	1.0268	0.748948	0.719313	0.833017	1.24787	0.668543	0.476066	0.52794	0.884424
ADRB2	0.356422	0.0752752	0.191703	0.32838	-0.00333849	0.145574	0.28185	0.225456	0.618922	-0.0799057	0.195623	0.0707806	0.224063	0.310549	0.396468	0.0725237	0.278045	0.340423	0.180458	0.242698	0.108553	0.0862707	-0.0991702	0.178423	0.274202	0.167079	0.0399888	0.0811571
ADRM1	-0.0520214	-0.0351804	0.0259196	0.11351	-0.467626	-0.0820237	0.267472	0.1186	0.176147	0.060266	0.167895	0.0544556	0.228883	0.0309711	0.22816	0.140963	0.106508	0.0677699	0.0130118	0.0850269	0.0898679	0.181851	0.226945	0.40229	0.0666507	0.194198	0.0048462	0.202979
ADSL	-0.852845	-0.642568	-0.656226	-0.861177	-0.613436	-0.843881	-0.541409	-1.03074	-0.834693	-0.75663	-0.634491	-0.713366	-0.617686	-1.08112	-0.583079	-0.502276	-0.710539	-0.624	-0.653067	-0.684452	-0.639522	-0.631574	-0.619945	-0.673914	-0.554556	-0.514299	-0.643414	-0.961348
ADSS	-0.322366	-0.462029	-0.269255	-0.0930545	-0.365582	-0.505014	-0.142721	-0.158315	-0.167695	-0.358948	-0.500573	-0.289556	-0.322095	-0.301864	-0.156506	-0.034546	-0.0706866	-0.382443	-0.0639578	-0.326727	-0.153285	-0.196908	-0.0519022	-0.104422	0.06352	-0.0259865	-0.175661	-0.213834
ADSSL1	0.103042	0.136779	0.103997	0.175824	0.246722	0.0351186	0.06985	0.0124355	0.23061	0.32123	0.179743	0.230132	0.000413618	0.0882993	0.0522803	0.171333	0.131539	-0.00690148	0.155574	0.247154	0.12172	0.152155	0.0801792	-0.0150141	0.0718109	0.0956407	0.256805	0.0470685
ADTRP	0.205002	0.23363	0.335413	0.306971	0.192596	0.271532	0.226241	0.170604	0.318507	0.0590048	0.259461	0.179858	0.204088	0.282565	0.154097	0.138994	0.0333357	0.0708325	0.200499	0.151332	0.192395	0.308571	0.127891	0.260207	0.115344	0.179128	0.283035	0.177015
AEBP1	-0.160258	-0.00269316	-0.0999675	0.429852	0.165024	0.103992	0.424708	0.447424	0.400468	0.196717	0.300472	0.181656	0.237323	0.214891	-0.0714593	0.287716	0.334296	0.324266	0.517833	0.0725752	0.51033	0.524168	0.258907	-0.0811526	0.202622	0.113218	0.252112	0.707619
AEBP2	-1.05362	-0.283848	-0.458764	-1.17613	-0.276187	-0.757381	-0.389705	-0.499415	-0.960966	-0.38823	-0.551635	-0.760672	-0.363566	-0.680698	-0.498279	-0.603483	-0.228638	-0.359948	-0.241717	-0.654942	-0.675631	-0.679372	-0.642296	-0.195832	-0.203591	-0.102058	-0.221114	-0.223649
AEN	-0.168618	0.0790295	-0.101134	0.0989044	-0.0823743	-0.110507	0.00992707	-0.292727	-0.00965362	-0.0179954	-0.0485875	-0.156525	0.078603	-0.390164	-0.302146	-0.193746	-0.198304	-0.0608591	-0.171063	-0.425302	-0.249762	-0.217936	-0.169198	-0.282048	-0.248099	-0.124504	-0.405956	-0.0963861
AFAP1	-0.603853	-0.0165894	-0.185354	-0.0544552	-0.409622	-0.276809	-0.330301	-0.309111	-0.168553	-0.0680505	-0.107762	-0.162786	-0.0597994	-0.0266128	-0.39219	-0.333141	-0.380948	-0.454998	-0.227953	-0.387433	-0.192217	-0.246322	-0.176066	-0.219456	-0.298414	-0.0745007	-0.314962	-0.339789
AFAP1L1	-0.296494	-0.214589	-0.0378326	0.13249	-0.0247953	0.121761	0.247511	-0.16149	-0.255849	0.183064	0.495677	0.0161773	-0.011375	0.522912	0.232609	0.217002	0.465816	0.370189	0.261806	0.360347	0.668123	0.588428	0.658863	0.814192	0.467211	0.982213	0.451222	0.756689
AFAP1L2	0.351107	0.0673301	0.160083	0.204232	0.321234	0.168419	0.379092	0.160243	0.133143	0.204236	0.514513	0.351782	0.194695	0.144947	0.511982	0.425731	0.374259	0.315399	0.262948	0.387896	0.305571	0.292714	0.5097	0.64922	0.18357	0.15282	0.283975	0.434876
AFDN	0.138129	0.457711	0.110123	0.152196	0.137147	0.0789719	0.3484	0.252193	0.21272	0.241459	0.237832	0.227216	0.308551	0.196199	0.467159	0.167594	0.403348	0.252691	0.31598	0.214401	0.281459	-0.0148174	0.34611	0.243147	0.135905	0.17695	0.216027	0.13509
AFF1	0.0449701	0.0201314	0.0119898	0.0421385	0.0180447	0.0276478	0.0161713	0.137529	0.00702597	0.00960454	-0.115525	0.0124144	-0.0569472	0.0876508	0.10871	-0.0231068	-0.11604	-0.150539	-0.0927094	-0.133108	-0.0367933	-0.0574953	0.0327122	0.0436193	0.0251452	-0.0989372	-0.0355355	-0.126608
AFF2	-0.151123	-0.221419	-0.14402	-0.195487	-0.0958797	-0.209373	-0.156522	-0.0812036	-0.215047	-0.289532	-0.175706	-0.207782	-0.272656	-0.315688	-0.376725	-0.211302	-0.180678	-0.267567	-0.231246	-0.100098	-0.0964654	-0.26791	-0.29391	-0.25179	-0.215565	-0.200626	-0.250882	-0.117909
AFF3	-0.050676	-0.036577	0.0186787	-0.00375336	0.0270191	-0.0366792	-0.050322	-0.00911668	-0.152061	-0.0678933	-0.0877944	-0.150067	-0.128741	-0.0635898	-0.0459111	-0.0802752	-0.150281	-0.148385	-0.103892	-0.0610551	-0.138053	-0.109945	-0.0973161	-0.024758	-0.145424	-0.161063	-0.0551652	-0.174529
AFF4	-0.257109	-0.273337	-0.551602	-0.262391	-0.391906	-0.361819	-0.413082	-0.299445	-0.3471	-0.309812	-0.421319	-0.118368	-0.291847	-0.237367	-0.253829	-0.210194	-0.315649	-0.307043	-0.308768	-0.241694	-0.513893	-0.0241209	-0.347174	-0.301672	-0.172352	-0.214516	-0.315322	-0.238908
AFG3L2	0.0496691	-0.1419	0.0731867	0.00228382	-0.172525	0.00361194	-0.271165	-0.152951	0.0875032	-0.12815	0.211134	0.178943	0.109733	0.296422	0.46036	0.26337	0.330591	0.165719	0.0953081	0.265252	0.219942	0.197484	0.434756	0.403365	0.217571	0.355776	0.246059	0.207122
AFM	0.0838111	0.0703556	0.091206	0.242018	0.167096	0.186599	0.05628	-0.0238158	-0.0317651	0.119431	0.175834	0.0817634	-0.0119342	-0.0271949	0.118388	0.13373	-0.00706319	0.0923321	-0.0371455	0.0555073	0.0274895	0.0166372	0.215211	0.111848	0.0340256	0.0443834	0.0757519	0.0726553
AFMID	0.0821266	-0.0550178	0.0979548	-0.110358	-0.0078916	0.49488	-0.294721	0.0671869	-0.164568	-0.147661	0.0296316	-0.178944	-0.02565	0.123129	-0.180845	-0.0972603	0.146365	0.0904535	-0.0410085	0.355039	0.0109044	-0.347896	0.103068	0.447901	0.00123892	-0.0645022	-0.077979	-0.0627973
AFTPH	-0.558875	-0.124388	-0.53372	-0.0406147	-0.673486	-0.749771	-0.225649	-0.627531	-0.178729	-0.387571	-0.616429	-0.24194	-0.280649	-0.472527	-0.442194	-0.524123	-0.235626	-0.0740555	-0.231424	-0.487525	-0.278499	-0.263785	-0.988822	-0.372897	-0.140397	-0.220968	-0.39075	-0.0313118
AGA	-0.644744	-0.580932	-0.76396	-0.838557	-0.801586	-0.938472	-0.783641	-0.591761	-1.03707	-0.844132	-0.738045	-0.559741	-0.743123	-0.92999	-0.559006	-0.573279	-0.67053	-0.513398	-0.495454	-0.657024	-0.914186	-0.723652	-1.07317	-0.873589	-0.780065	-0.877405	-0.786708	-0.760748
AGAP1	-0.118302	-0.1897	-0.113011	-0.161117	-0.130687	-0.169129	-0.134625	-0.128644	-0.141562	-0.211621	-0.183244	-0.178546	-0.156056	-0.075178	-0.208102	-0.161939	-0.0802512	-0.105014	-0.227693	-0.178742	-0.0954529	-0.0935187	-0.147426	-0.166257	-0.134373	-0.174219	-0.135753	-0.17193
AGAP2	0.718279	0.521768	0.608252	0.587678	0.588962	0.430207	0.887805	0.918798	0.478847	0.562032	0.560285	0.568345	0.534607	0.659912	0.48056	0.529227	0.368097	0.704405	0.532589	0.709505	0.648902	0.444094	0.389676	0.747875	0.579338	0.479144	0.478322	0.405983
AGAP3	-0.122329	-0.198401	-0.0322165	0.0852027	0.00479782	0.248283	0.163517	-0.151164	0.178523	0.208346	0.0638914	0.323136	0.284616	0.296475	0.257248	0.224569	0.29342	0.302385	0.186103	0.149376	0.254407	0.196397	0.0381207	0.136286	0.199891	0.304781	0.176099	0.157532
AGBL2	0.250852	0.177236	0.298606	0.203298	0.324709	0.320519	0.0506571	0.352305	0.247708	0.0581442	0.188651	0.256741	-0.00428162	-0.062398	0.128787	0.134005	0.0606047	0.0922301	0.20202	0.197997	0.0950744	0.0413844	-0.107554	0.0712074	0.00234782	-0.0691523	0.086531	-0.0179564
AGBL3	0.368791	0.287106	0.138793	0.373677	0.312227	0.38766	0.273903	0.309651	0.127654	0.151163	0.204118	0.257786	0.185758	0.258565	0.120909	0.172641	0.235679	0.157279	0.297698	0.183823	0.246845	0.206945	0.335383	0.496917	0.228868	0.166247	0.306235	0.157224
AGBL4	0.159349	0.2516	0.129287	0.306313	0.281492	0.220195	0.185014	0.189698	0.0676858	0.157904	0.24273	0.0325864	0.14392	-0.0594355	-0.115941	0.0480159	0.0201398	0.205007	0.0587127	0.161552	0.216762	0.0388822	-0.0197385	0.238407	0.0954101	0.153431	0.133452	0.0789649
AGBL5	-0.998514	-0.510545	-0.798701	-0.466839	-0.798716	-0.597136	-0.500991	-0.555088	-0.76995	-0.548526	-0.415666	-0.705621	-0.600471	-0.175398	-0.609809	-0.604484	-0.866865	-0.574268	-0.572379	-0.604126	-1.08333	-0.640233	-0.709943	-0.757792	-0.644617	-0.885923	-0.863766	-0.767968
AGBL5-AS1	0.176626	-0.161847	-0.0183358	0.159177	0.115422	0.437261	0.256738	0.229095	0.241381	0.300527	0.11765	0.252535	0.103797	0.0949843	0.320557	0.223652	0.244627	0.251735	0.06744	0.138885	0.159321	0.369407	0.359048	0.464599	0.249926	0.185215	0.23549	0.174162
AGER	-0.252712	-0.185908	-0.20511	-0.320876	-0.302184	-0.349989	-0.206898	-0.250859	-0.25093	-0.0646065	-0.169766	-0.202197	-0.318579	-0.239235	-0.153797	-0.275218	-0.283722	-0.30956	-0.167071	-0.384539	-0.43825	-0.173722	-0.374215	-0.302699	-0.304175	-0.27948	-0.58246	-0.327403
AGFG2	0.654082	0.593348	0.621354	0.622447	0.587626	0.70126	0.713047	0.41564	0.693528	0.600131	0.785306	0.533468	0.756912	0.472505	0.503143	0.643307	0.801588	0.590456	0.739594	0.403791	0.637128	0.522195	0.726657	0.850798	0.452228	0.551477	0.631534	0.719613
AGGF1	0.130037	0.0825878	0.068568	0.120389	0.176073	0.0680793	0.142375	-0.19439	-0.021402	-0.0317236	-0.0645587	-0.0372978	0.0041086	-0.0504596	-0.12828	-0.0160508	-0.208493	-0.133024	-0.114276	0.0850252	-0.0804346	-0.136815	-0.00390957	-0.146977	-0.0761394	-0.118887	0.018111	-0.00496048
AGK	-0.136799	-0.409642	-0.179944	-0.0940835	-0.331905	-0.229993	-0.588072	-0.39659	-0.120934	-0.115975	-0.0552285	0.0298506	-0.0809876	0.097122	0.0103303	0.0721298	0.0884467	0.246028	-0.0624541	0.273566	0.0372997	0.00147557	-0.158455	0.0769568	0.0453117	0.059028	0.22963	0.0637001
AGL	0.0940488	0.061693	0.270482	0.268397	0.276648	0.067138	-0.0296676	0.238173	0.195023	0.219975	0.359822	0.105425	0.172444	0.265789	0.19928	0.260809	0.129548	0.229394	0.413767	0.465259	0.222354	0.413925	0.398027	0.540404	0.143946	0.237908	0.314648	0.353959
AGMO	0.419029	0.467161	0.372102	0.378575	0.446348	0.531135	0.238488	0.362618	0.554547	0.484862	0.517744	0.539833	0.56882	0.599229	0.318856	0.400615	0.43055	0.363228	0.485348	0.342678	0.458836	0.332464	0.433213	0.174098	0.425533	0.261575	0.267626	0.149612
AGO1	-0.504677	-0.525216	-0.321255	-0.439563	-0.337945	-0.522527	-0.21849	-0.375588	-0.809281	-0.543295	-0.437843	-0.511566	-0.550598	-0.670891	-0.535744	-0.567049	-0.697379	-0.584555	-0.399245	-0.421213	-0.599082	-0.517136	-0.575743	-0.518105	-0.465777	-0.404316	-0.53789	-0.717772
AGO2	-0.27185	-0.128547	-0.299212	-0.232788	-0.41851	-0.27911	-0.232629	-0.35678	-0.262235	-0.251187	-0.214683	-0.242394	-0.216686	-0.195174	-0.125806	-0.244591	-0.187843	-0.142853	-0.189227	-0.178773	-0.203049	-0.215677	-0.122003	-0.13442	-0.252558	-0.318507	-0.284318	-0.22051
AGO3	-0.142287	-0.213947	-0.396402	-0.245019	-0.413621	-0.473793	-0.230763	-0.224074	-0.261188	-0.31846	-0.325742	-0.334764	-0.257396	-0.273549	-0.367859	-0.295571	-0.192356	-0.333841	-0.509369	-0.389931	-0.559019	-0.262726	-0.227494	-0.176536	-0.159793	-0.230249	-0.23938	-0.307213
AGO4	-0.783555	-0.682587	-0.689985	-0.780663	-0.763517	-0.647019	-0.581949	-0.536427	-0.411563	-0.512389	-0.592955	-0.521496	-0.540008	-0.428363	-0.445301	-0.724599	-0.417109	-0.56232	-0.640422	-0.765347	-0.597885	-0.479763	-0.383035	-0.495998	-0.695791	-0.55125	-0.454229	-0.513569
AGPAT3	-0.435649	-0.473526	-0.478998	-0.351046	-0.470513	-0.464353	-0.424633	-0.490382	-0.403959	-0.408325	-0.242579	-0.477968	-0.512226	-0.479701	-0.349523	-0.406453	-0.259255	-0.327943	-0.330464	-0.344229	-0.310579	-0.418439	-0.317937	-0.0313797	-0.412813	-0.381065	-0.259422	-0.094621
AGPAT4	0.250176	0.232182	0.19214	0.144637	0.125221	0.255688	0.273707	0.227626	0.127553	0.296914	0.152452	0.172102	0.156849	0.244236	0.146282	0.232449	0.209831	0.310242	0.144769	0.310839	0.245409	0.219665	0.215435	0.203448	0.283828	0.137843	0.145116	0.132739
AGPAT5	-0.473931	-0.259003	-0.382285	-0.582332	-0.444148	-0.548479	-0.626351	-0.406204	-0.398392	-0.452132	-0.477921	-0.324691	-0.333781	-0.414388	-0.31281	-0.477408	-0.572431	-0.327965	-0.587661	-0.477341	-0.79139	-0.349305	-0.681877	-0.798442	-0.583031	-0.482876	-0.722341	-0.596958
AGPS	-0.353955	-0.205187	-0.272328	-0.388375	-0.646863	-0.523997	-0.446249	-0.389933	-0.173944	-0.0853861	-0.157985	-0.256455	-0.224724	-0.237201	-0.183569	-0.185442	-0.265669	-0.117671	-0.210022	-0.282907	-0.271005	-0.280073	-0.49601	-0.15953	-0.366185	-0.278063	-0.0697854	-0.140019
AGR2	0.0647848	-0.0533408	-0.0320394	-0.0801999	0.176963	0.0497987	-0.111467	-0.0383422	-0.228851	-0.156291	-0.162694	-0.12023	-0.304832	-0.245151	-0.228715	-0.239425	-0.287987	-0.188175	-0.0405423	0.11904	-0.105994	-0.130334	-0.0138477	-0.235892	-0.16412	-0.109765	-0.374876	-0.423012
AGR3	0.0962888	0.212928	0.250269	0.273758	0.17662	0.0812899	0.148006	0.0965264	-0.0977133	0.0889824	0.0612324	-0.240863	0.18307	-0.196596	0.00376116	0.0491634	-0.0111102	-0.00814574	0.04892	-0.0895537	0.0733459	-0.031136	-0.060303	0.0585331	-0.0916721	0.157218	0.0946068	0.140709
AGRN	0.0765022	0.0900447	0.122307	0.133804	0.244736	0.150865	-0.0426932	-0.193569	0.229996	-0.00984502	-0.0459212	-0.234979	0.370339	0.318512	-0.169342	0.361715	0.40285	0.180303	0.231389	0.0290662	0.124889	0.102108	0.0136305	0.270994	0.189524	0.254135	0.259294	-0.0868724
AGT	0.240127	0.080903	0.761706	0.517288	0.514897	0.561351	0.418785	0.658158	0.456891	0.244416	0.275904	0.308511	0.398742	0.252447	0.307054	0.0689258	0.288973	0.164341	0.0402952	0.300144	0.298976	0.12936	0.524063	0.103091	0.383652	0.22773	0.289598	0.384144
AGTPBP1	-0.265731	0.00844255	-0.360519	-0.332449	-0.131416	-0.286281	-0.42655	-0.188508	-0.305066	-0.283639	-0.201619	-0.171955	-0.459305	-0.0752614	-0.202213	-0.329706	-0.114098	-0.180776	-0.125491	-0.340461	-0.410539	-0.293982	-0.33642	0.0495866	-0.14624	-0.453357	-0.164668	-0.238412
AGTR1	0.0432657	0.0388458	-0.0962646	0.0422628	-0.0536456	-0.163717	0.061732	0.249605	0.00142898	-0.0217972	0.0629043	0.148234	0.166061	-0.051898	-0.0729405	0.0809678	-0.0412414	0.0496411	0.0605353	0.156581	0.178556	-0.0438281	0.170782	-0.1345	0.0392189	0.0984449	-0.0176363	0.0520655
AGTRAP	-0.289691	-0.3298	-0.314195	-0.160258	-0.215173	-0.290955	-0.196139	-0.199312	-0.201622	-0.263321	-0.173502	-0.337525	-0.178393	-0.0181807	-0.109321	-0.24498	-0.133411	-0.0423636	-0.0563164	-0.275215	-0.0661014	-0.00374634	-0.0828284	-0.256848	-0.00706441	-0.0302764	-0.0306381	0.0196485
AGXT2	-0.103299	-0.278137	-0.0906474	-0.429224	-0.295104	-0.110045	-0.206292	-0.249588	-0.18275	-0.21332	-0.237019	-0.204701	-0.0683162	-0.0282298	-0.123417	-0.194099	-0.336932	-0.270986	-0.187206	-0.26884	-0.149968	-0.144802	-0.156718	-0.340651	-0.125604	-0.113423	-0.203886	-0.111149
AHCTF1	-0.444684	-0.563443	-0.471615	-0.635935	-0.456865	-0.583993	-0.477613	-0.601784	-0.663022	-0.469866	-0.70853	-0.439219	-0.278333	-0.535679	-0.280201	-0.561201	-0.458845	-0.505516	-0.441268	-0.491222	-0.509722	-0.454769	-0.391649	-0.689999	-0.39206	-0.368935	-0.421588	-0.696463
AHCYL1	-1.25489	-0.969151	-1.22164	-0.76516	-1.22915	-1.21981	-1.02364	-1.0396	-1.06645	-0.963057	-0.783284	-0.769959	-1.05681	-0.99677	-0.862119	-0.716732	-0.723883	-0.910525	-0.728207	-0.896612	-1.01035	-1.01983	-1.12766	-1.04753	-0.96621	-0.969767	-0.980272	-0.468896
AHCYL2	0.216514	0.0590427	0.183951	0.0836611	0.240896	0.160026	0.136856	0.0881154	0.145143	-0.0110148	0.21137	0.115911	0.109741	0.125346	0.104697	0.00662417	0.0101013	-0.0213868	0.0405191	0.0400677	0.0188515	0.0592891	0.115932	0.240074	0.124673	0.0871452	0.123728	0.0816015
AHDC1	0.460397	0.247122	0.312643	0.356877	0.532396	0.540987	0.312214	0.547037	0.505452	0.0336629	0.390279	0.183959	0.18249	-0.00552115	0.281814	0.476328	0.287839	0.0679031	0.372653	0.297529	0.423027	0.334238	0.302668	0.204663	0.34409	0.365476	0.180489	0.0887538
AHI1	-0.0185014	0.0305292	-0.0495298	-0.0952002	-0.0899164	-0.0898828	-0.121248	0.00270135	-0.0985951	-0.149694	-0.107676	-0.0283392	-0.222403	-0.0785003	-0.053964	-0.0455544	-0.205786	-0.187751	-0.210796	-0.137893	-0.0056009	-0.195043	-0.11476	-0.185222	-0.135208	-0.206657	-0.168612	-0.187596
AHNAK	-0.0700583	-0.0502205	-0.0784969	0.322757	-0.374106	-0.307085	0.28169	-0.267787	-0.148055	-0.159033	0.10964	0.0543081	-0.0282832	0.0951824	0.13903	-0.00445446	0.172816	0.0670055	0.0307213	-0.033885	-0.234221	-0.0783418	-0.262602	-0.265575	-0.0565172	0.158197	0.0755378	-0.0101941
AHNAK2	-0.82625	-0.775863	-0.707267	-0.307051	-0.580674	-0.656956	-0.5919	-0.763005	-0.584392	-0.367981	-0.557341	-0.542206	-0.477174	-0.503481	-0.833477	-0.449034	-0.359692	-0.482004	-0.549381	-0.499177	-0.451059	-0.528574	-0.997568	-0.890196	-0.388812	-0.516109	-0.662714	-0.46364
AHR	-0.524138	-0.228723	-0.264653	-0.201499	-0.286086	-0.218941	-0.125488	-0.324226	-0.380476	-0.154594	-0.117397	-0.35217	-0.00850107	-0.353671	-0.313813	-0.0508069	-0.442314	-0.115757	0.013426	-0.206718	-0.439781	-0.308623	-0.273885	0.04948	-0.0594317	-0.238768	0.0686903	-0.10153
AHRR	-0.0735233	-0.00511361	-0.117615	-0.0686151	-0.40386	-0.209404	-0.101384	-0.0712648	-0.0512968	-0.134421	-0.00669043	-0.220287	-0.0571447	-0.113111	-0.1567	-0.0502723	-0.219624	-0.0557128	0.0152765	-0.0725022	-0.0947919	-0.0144255	-0.0709537	-0.212522	-0.0664169	-0.0409672	-0.027982	-0.0973818
AHSA1	-0.263928	-0.0744699	-0.0143478	-0.307195	-0.235921	0.0835534	0.122704	-0.263975	0.203957	0.0564499	0.173429	0.115959	0.247116	0.0388974	0.0799679	0.0772126	0.242185	0.139452	0.462457	0.077139	0.142425	0.0815614	0.211563	-0.0760996	0.0873141	0.232322	0.200223	0.0950196
AHSG	-2.64068	-2.08515	-2.23542	-2.50064	-2.13666	-1.50964	-2.10118	-2.41702	-2.34272	-2.12885	-2.11355	-2.22787	-2.38667	-2.27148	-2.18791	-1.85281	-2.5577	-2.51748	-2.20821	-2.38534	-2.52376	-2.05759	-2.26299	-2.128	-1.97272	-2.09312	-2.12304	-2.33555
AHSP	-0.401135	-0.197594	-0.58983	-0.170134	-0.397539	-0.41462	-0.478689	-0.253622	-0.193003	-0.197046	-0.417779	0.0575759	-0.213937	-0.175967	-0.401552	-0.203778	-0.236427	-0.248284	-0.286843	-0.339235	-0.167473	-0.156952	-0.288299	-0.163948	-0.0287811	-0.366927	-0.443135	-0.328636
AIDA	0.559867	0.440003	0.445947	0.483015	0.446924	0.550093	0.37568	0.0488825	0.684194	0.331013	0.196175	0.520531	0.442014	0.636952	0.188584	0.439419	0.343154	0.38712	0.254339	0.352739	0.419107	0.410093	0.338277	0.407588	0.306889	0.192685	0.189262	0.254046
AIFM1	0.185356	-0.0905715	-0.0638676	-0.0184109	0.338936	0.543945	-0.325684	-0.0124611	0.193176	-0.0463477	0.268728	0.293111	0.409153	-0.107271	0.312371	0.468605	0.0362516	0.395587	0.565836	0.323595	0.373887	0.375054	0.512623	0.836715	0.300022	0.452032	0.278081	0.415126
AIFM3	0.349076	-0.00357228	0.0769573	0.199398	0.223522	0.1578	0.229522	0.212489	0.154507	0.0835099	0.214321	0.204836	0.125209	0.10911	0.342335	0.305603	-0.0503017	0.17759	0.21484	0.138302	0.192722	0.142998	0.115031	0.0924755	0.309078	0.169024	0.26738	0.17422
AIG1	0.300553	0.0473572	0.0219751	0.00891169	0.131637	0.101941	0.0216926	0.0324038	0.0496581	-0.017864	-0.00410805	0.161185	0.0929973	0.0891295	0.121364	0.0752802	0.127369	0.123509	0.0984098	0.11947	0.139454	0.0378297	0.134717	0.139738	0.150798	0.0918981	0.0813462	0.0337402
AIM1	0.127806	0.0494678	0.0580649	0.225622	0.152927	0.11768	0.136148	0.00611807	0.234003	0.263083	0.111141	-0.00109576	-0.0430232	0.143757	0.222614	0.222149	0.0247454	0.128361	0.27429	0.0665121	-0.165303	-0.0966808	-0.0276336	-0.0155401	-0.0836529	-0.12887	-0.0658017	-0.0178551
AIMP1	0.14627	-0.0239921	0.0519813	-0.00352647	0.234822	0.0948878	0.145439	0.0270021	0.0481865	0.20318	0.267106	0.230977	0.0811625	0.268673	-0.0186385	0.099043	0.322637	0.0551614	0.242491	0.179654	-0.042034	0.0838116	-0.112845	0.107605	0.0495086	-0.0677674	-0.0433581	-0.00467826
AIMP2	-0.455822	-0.210839	-0.113193	-0.0620826	-0.216308	-0.217457	-0.0755814	-0.0627931	-0.468131	-0.280713	-0.30917	-0.259233	-0.176393	-0.353813	-0.219528	-0.330794	-0.314709	-0.176914	-0.180781	-0.171153	-0.191097	-0.346715	-0.237966	-0.449955	-0.172713	-0.187011	-0.231715	0.0140435
AIPL1	-0.245737	-0.251523	0.0143783	-0.00466038	-0.0590313	-0.173956	-0.136228	-0.043575	-0.208775	-0.38508	-0.409302	-0.373578	-0.308662	-0.256526	-0.243966	-0.294705	-0.271069	-0.292231	-0.332001	-0.30117	-0.199975	-0.240612	-0.218881	-0.469302	-0.130914	-0.120028	-0.252444	-0.161362
AIRE	0.402834	0.222171	0.386927	0.475565	0.444094	0.335062	0.452342	0.119265	0.458868	0.87877	0.245649	0.283472	0.273578	0.462659	0.189811	0.338265	0.44894	0.168918	0.308694	0.220647	0.354151	0.420507	0.387843	0.930797	0.35083	0.158545	0.46277	0.425408
AJAP1	0.0651534	0.0449426	0.0305077	0.0700865	0.0155682	0.213569	0.029769	-0.0976036	-0.197688	0.0263588	-0.18747	0.0428073	-0.0245862	0.0064854	-0.0760659	0.00820416	-0.0539829	0.0403499	-0.019961	0.136121	0.0732661	-0.0358433	-0.062544	0.0780141	-0.0150904	-0.0587774	0.142961	0.0664438
AJUBA	-0.270708	-0.150327	0.0168108	0.0613621	-0.199345	-0.218374	0.0425261	-0.161869	-0.132532	-0.226697	0.0310172	-0.206295	-0.134842	-0.141358	-0.0342457	-0.153784	-0.0272361	0.0216625	0.135371	-0.0504107	-0.16184	-0.0355134	0.051734	0.124672	-0.0507446	-0.0444427	0.0980419	0.0207424
AK1	0.934203	0.822991	0.692406	0.864489	1.12782	1.11573	0.907847	1.1105	1.26471	1.0852	1.31663	1.1517	1.11458	1.23502	1.5419	1.67352	1.89119	1.29868	1.24363	1.8532	1.23489	1.38789	1.42009	1.66147	1.16684	1.41455	1.38865	1.22303
AK2	-0.163719	-0.144846	0.0938463	0.00351119	-0.0781003	-0.0556293	-0.0583882	-0.101238	-0.038152	0.0128117	-0.0811282	-0.05121	-0.0374715	-0.222876	-0.03854	-0.298089	-0.216517	-0.202367	-0.0982766	-0.169209	-0.104793	-0.122055	-0.0797864	-0.112193	-0.173905	-0.0104914	0.0355542	-0.0576612
AK3	0.153416	0.0492748	0.138251	0.104616	0.17735	0.239995	0.112462	0.0427427	0.183741	-0.106252	0.160246	0.179726	0.110695	0.0675356	0.160169	0.0837486	0.118001	0.200983	0.201212	0.214402	0.0336462	0.161221	0.162095	0.283083	0.127648	0.107243	0.277396	0.352981
AK4	-0.0901541	-0.27375	-0.167011	-0.0786007	0.102231	0.00716691	-0.40401	-0.232498	-0.0831223	-0.27976	0.0297126	-0.0371443	-0.0415524	0.21257	0.246727	0.0938744	0.318662	0.368742	0.209789	0.393468	0.419186	0.404157	0.366938	0.720105	0.403633	0.204011	0.439568	0.150356
AK6	-1.18707	-1.09537	-1.14475	-0.653812	-0.835266	-0.821383	-0.923409	-0.591973	-0.827582	-0.636546	-0.777755	-0.803961	-0.691005	-0.607211	-0.648011	-0.890798	-0.48629	-0.749918	-0.64342	-0.938485	-0.759419	-0.647148	-0.824711	-0.816354	-0.635204	-0.803625	-0.884498	-0.678234
AK7	-0.123809	-0.211703	0.0441134	-0.00405908	-0.0988709	0.0366468	0.0027404	-0.00448955	-0.00716995	-0.136286	-0.164238	-0.234721	-0.206824	-0.0950431	-0.171686	-0.0232364	-0.163924	-0.288613	-0.187873	-0.108286	-0.106346	-0.149548	-0.161191	-0.243799	-0.161886	-0.204127	-0.223826	-0.189073
AK8	-0.0577901	0.142055	-0.0771991	-0.13648	-0.121994	-0.0627606	0.0830419	0.216048	0.158423	-0.0357659	0.0268427	-0.0530297	0.0117055	-0.124409	0.0333773	0.119043	0.0235726	-0.143354	-0.0536318	0.0365402	0.0200188	-0.0214385	-0.0362726	0.0138656	0.0222849	-0.0187997	0.03353	0.062701
AK9	0.0906256	0.151011	0.138216	0.127894	0.0278083	0.131773	0.0341268	0.0993432	0.0701902	0.0148251	0.0386405	0.0490582	0.0567466	-0.0928543	0.11679	-0.086384	-0.00239644	0.0949366	-0.0643181	-0.00710759	0.0809907	0.176978	0.178394	-0.0740537	0.0832992	0.204831	0.125991	0.0427636
AKAP1	-0.0427574	-0.156885	0.0535443	-0.153883	-0.144992	-0.0613874	-0.0756556	0.0560494	-0.114843	-0.186159	-0.212674	-0.129961	-0.20253	-0.0756739	-0.0381133	-0.11316	-0.132997	-0.128502	-0.208256	-0.127883	-0.146617	-0.156541	-0.0436461	-0.132143	-0.0994967	-0.197269	-0.218076	-0.131703
AKAP10	-0.0269846	-0.163552	-0.203879	-0.211366	-0.224224	-0.212009	-0.293026	-0.0344894	-0.268193	-0.035362	-0.263119	-0.298118	-0.198563	-0.192104	-0.0627527	-0.269055	-0.287932	-0.229443	-0.239937	-0.267567	-0.233292	-0.14116	-0.244126	-0.371361	-0.271598	-0.306668	-0.308072	-0.239634
AKAP11	-0.106418	-0.0558693	-0.0838196	-0.0706228	0.0690048	0.014311	-0.0122194	-0.0662014	0.0357229	-0.0743202	-0.0646931	0.0649415	0.0308843	0.0863279	-0.186249	0.0050949	-0.244338	-0.000908508	-0.0706989	0.0567757	-0.114047	0.0980233	0.019428	0.0803271	-0.110737	-0.0310575	0.0568107	-0.12487
AKAP12	-0.676483	-0.494173	-0.517469	-0.6478	-0.507209	-0.49962	-0.433585	-0.276836	-0.432064	-0.503005	-0.571043	-0.437187	-0.409362	-0.431682	-0.210114	-0.285129	-0.311112	-0.356472	-0.38026	-0.383045	-0.324582	-0.384396	-0.435434	-0.529274	-0.208368	-0.203936	-0.370057	-0.380278
AKAP13	0.189445	0.256358	0.132166	0.0292352	0.0401958	0.125343	0.149877	0.185952	0.1515	0.247059	0.156216	0.134875	0.101774	0.260342	0.260346	0.3982	0.206099	0.257266	0.334713	0.187778	0.241047	0.273073	0.394121	0.42988	0.300076	0.379399	0.308913	0.163831
AKAP14	0.0671423	0.0173429	0.0765354	0.396943	0.230608	0.277846	0.0939054	0.16709	0.164925	0.0385848	-0.0489989	0.0676191	-0.0377259	0.00899025	0.11379	-0.0299808	-0.0300727	-0.124284	0.0222715	0.0877726	-0.0666866	-0.0760481	-0.0749309	-0.171388	-0.0880476	-0.0364868	-0.124838	-0.109866
AKAP17A	0.139163	0.0623406	0.126054	0.196722	0.156725	0.188058	0.0854965	0.156278	0.16234	0.095711	0.138992	0.233313	0.124727	0.232444	0.0837819	0.162212	0.13948	0.133068	0.19865	0.216774	0.152554	0.187903	0.226292	0.125249	0.132174	0.212857	0.136169	0.0969183
AKAP3	0.460317	0.40744	0.490193	0.385329	0.473502	0.536318	0.593568	0.699231	0.693745	0.383426	0.481324	0.339685	0.367215	0.615243	0.264652	0.403144	0.285458	0.284473	0.330946	0.381835	0.421816	0.326662	0.39668	0.375856	0.314943	0.201865	0.275516	0.19592
AKAP4	0.280623	0.281683	0.331178	0.0489829	0.155296	0.172736	-0.0127546	0.329063	0.220706	0.832428	0.101196	0.164481	0.220661	0.0329355	0.00773057	0.0624033	0.127156	0.0516667	-0.0645335	-0.0236791	-0.0481121	0.0947252	-0.111379	-0.0597337	-0.0144352	-0.019139	-0.180539	-0.152358
AKAP5	0.18349	0.0287937	0.158952	0.0509106	0.102927	0.160114	-0.0711993	0.0941715	0.181621	0.40273	0.293466	0.185603	0.412078	0.0276158	0.14941	0.249272	0.25589	0.235141	0.248744	0.137444	-0.0106788	0.0891168	-0.0794531	0.115515	0.0362029	0.172072	0.112924	0.138045
AKAP6	0.488672	0.538304	0.611534	0.508684	0.553788	0.518875	0.557692	0.597022	0.380717	0.382838	0.528149	0.305137	0.217111	0.606683	0.454088	0.768936	0.623882	0.336222	0.727338	0.720724	0.540207	0.528408	0.754268	0.969345	0.479972	0.374945	0.350794	0.702063
AKAP7	0.441893	0.288095	0.209374	0.0800988	-0.00671697	0.10568	0.0764994	-0.0657155	0.184352	0.377949	0.139282	0.0537332	-0.0383008	0.0987937	-0.0330396	0.0429771	-0.234449	-0.181255	-0.206149	-0.112306	-0.208008	-0.0454226	0.243859	0.151807	0.0236363	-0.0352974	0.100549	0.198174
AKAP8	-0.417772	-0.530848	-0.630436	-0.552772	-0.607767	-0.359004	-0.1223	-0.466598	-0.53704	-0.507002	-0.633996	-0.178372	-0.120595	-0.419885	-0.410164	-0.195098	-0.597365	-0.298504	-0.49189	-0.435493	-0.613948	-0.465063	-0.576366	-0.185592	-0.10129	-0.302595	-0.132934	-0.355019
AKAP8L	-0.930472	-0.648748	-0.593654	-0.760173	-0.84139	-0.743702	-0.512245	-0.569959	-0.520628	-0.706921	-0.712009	-0.660396	-0.396073	-0.558871	-0.380594	-0.818769	-0.386329	-0.608113	-0.615812	-0.571753	-0.533754	-0.402099	-0.592101	-0.626578	-0.343949	-0.39723	-0.435086	-0.388041
AKAP9	-0.0459342	0.0413936	0.0518169	0.0308689	0.108138	0.0836898	0.00564182	0.0763693	0.0463298	0.0657237	0.0552928	0.0334078	0.0391543	-0.0611625	0.0955996	-0.0753153	-0.025422	0.12849	-0.0392072	0.0938634	-0.038709	0.0335436	0.0607234	0.103075	-0.0493424	0.020457	0.0614843	0.0725568
AKIP1	-0.825482	-0.629023	-0.595044	-0.726941	-0.727739	-0.616232	-0.754793	-0.547292	-0.602073	-0.637232	-0.69103	-0.644157	-0.609794	-0.460257	-0.609548	-0.85004	-0.575911	-0.731558	-0.731745	-0.756551	-0.75046	-0.605379	-0.801616	-0.60727	-0.729257	-0.67993	-0.862348	-0.690698
AKIRIN2	0.0883752	0.22955	0.198653	0.149083	0.0654977	0.0351581	0.173862	0.0157954	0.160464	0.131183	0.0454661	0.0396013	0.0572762	0.0303307	0.0034888	0.0793777	0.0472008	0.00631006	0.325101	0.0864427	-0.00811882	0.0423708	0.141787	0.10527	0.0863357	0.196667	0.175959	0.0721116
AKNA	-0.249513	-0.171703	-0.644269	-0.28045	-0.48611	-0.17719	-0.344121	-0.275997	-0.503337	-0.256609	-0.122997	-0.288069	-0.335163	-0.204244	-0.474119	-0.259225	-0.200951	-0.339541	-0.281814	-0.393193	-0.388293	-0.272273	-0.465522	-0.605273	-0.36047	-0.334905	-0.50577	-0.36835
AKNAD1	0.365968	0.243938	0.36312	0.218511	0.239394	0.348605	0.223388	0.155627	0.490061	0.0665104	0.20788	0.0155767	0.193561	0.154755	0.17977	0.0908615	0.159578	0.127219	0.268326	0.0748747	0.029614	0.133529	0.0946358	0.158568	0.179343	0.165954	0.335639	0.0850711
AKR1B1	-0.807508	-0.665956	-0.305283	0.113436	-0.322593	-0.35951	-0.273549	-0.684476	-0.279289	-0.249161	0.401338	-0.21923	0.149761	-0.371587	-0.223654	0.267119	-0.0117075	0.038343	0.0604551	-0.148974	0.212439	0.202768	0.0736008	0.341421	-0.141261	0.0556519	-0.269907	-0.148085
AKR1B10	-0.641841	-0.419036	-0.466205	-0.532872	-0.743561	-0.646883	-0.430652	-0.544574	-0.312382	-0.0400242	-0.206047	-0.380882	-0.120022	-0.532253	-0.261297	-0.00932381	-0.0948416	-0.122181	-0.168337	-0.246866	-0.0134319	-0.00853535	-0.0988748	-0.0322464	-0.232328	0.0398568	-0.114885	-0.233111
AKR1C1	-0.786864	-0.571246	-0.555411	-0.614065	-0.496137	-0.722064	-0.549442	-0.38425	-0.505756	-0.542317	-0.816076	-0.603429	-0.450865	-0.794364	-0.518691	-0.498232	-0.579142	-0.475458	-0.491556	-0.437384	-0.595135	-0.613613	-0.445349	-0.78817	-0.575556	-0.426376	-0.607689	-0.604199
AKR1C3	-2.27205	-1.81867	-1.23555	-1.22161	-2.09288	-1.35445	-1.10219	-1.31784	-1.41554	-1.26357	-1.7722	-1.65744	-0.92358	-1.85395	-1.57428	-1.21836	-1.07089	-1.36733	-0.850446	-1.22303	-1.5679	-1.82244	-1.58426	-1.95525	-1.73397	-1.40195	-1.54656	-1.46944
AKR1C4	-0.169323	-0.0303756	-0.101493	0.114827	0.0600725	-0.333323	-0.269568	-0.194878	0.229179	0.113057	-0.366052	0.0526499	-0.208012	0.148516	0.324703	0.265444	0.088893	0.168703	0.0877314	-0.119193	-0.230043	0.143945	0.13237	0.0405681	0.0566001	-0.49449	0.147875	0.294131
AKT3	-0.136954	0.00600555	0.00681445	0.0711196	0.0174913	-0.128834	-0.0232967	0.00275574	-0.191686	-0.17628	-0.0781297	-0.196112	-0.115821	-0.147298	-0.202583	-0.151445	-0.135922	-0.111839	-0.124046	-0.0172534	-0.0422513	-0.151994	-0.191421	-0.00863391	-0.111192	-0.0199861	-0.142978	-0.0308338
AKTIP	0.20058	0.471283	0.536728	0.162603	0.133147	0.248832	0.26759	0.189938	0.083576	0.0312934	0.431819	0.375865	0.361279	0.245212	0.403331	0.407442	0.318976	0.315739	0.152611	0.436891	0.189046	0.292205	0.311592	0.542879	0.385833	0.430413	0.343938	0.398926
ALAD	0.077553	0.153066	0.240383	0.0675638	0.176215	0.104004	0.292382	0.442678	0.0655889	-0.0373104	0.150885	0.183864	0.0824291	0.048213	-0.148874	0.0735975	0.186863	-0.133595	0.0202795	-0.0199133	0.200859	0.144697	0.210027	0.321963	0.15095	0.304675	0.0368019	0.113903
ALAS1	0.759325	0.397394	0.332053	0.510503	0.717891	0.87959	0.428124	0.307725	0.612807	0.861039	1.12099	0.911505	0.800272	0.778118	0.985452	1.26236	0.849433	1.25422	1.27163	1.03702	1.04238	1.25907	1.4856	1.46403	1.21543	1.291	1.31418	1.37027
ALAS2	0.283677	0.162363	0.136711	0.0477741	0.15189	0.144804	0.161703	0.0527414	0.372779	0.262315	0.0626576	0.141841	0.278342	0.39522	0.109879	0.220838	0.0970875	0.292514	0.248226	0.195316	-0.0790777	0.131327	0.238167	0.198684	0.13914	0.164901	0.0914572	0.201545
ALB	-2.15636	-2.00719	-2.22977	-1.83721	-1.91471	-2.19929	-2.24141	-2.24202	-2.21376	-2.23577	-2.27667	-2.10909	-2.13192	-2.32409	-2.11955	-2.2968	-2.51246	-1.83794	-2.28578	-2.31991	-2.62825	-2.24536	-2.53985	-2.64323	-1.98308	-2.34768	-2.85866	-2.60526
ALCAM	0.312281	0.168305	0.109412	0.0289282	0.233406	0.364846	0.213514	0.251163	0.32619	0.20546	0.266731	0.108101	0.291786	0.450517	0.270761	0.155427	0.1354	0.206496	0.235167	0.14014	0.223956	0.215377	0.168852	0.453446	0.232749	0.250587	0.163574	0.22001
ALDH16A1	-0.117009	-0.044187	-0.041066	-0.0448305	0.128505	0.051886	-0.0392674	0.0958099	0.0874991	0.0864144	-0.093313	-0.0241497	-0.00214843	0.062396	0.0425532	-0.0872841	0.0927007	-0.0104371	0.103517	-0.0308436	0.0820883	0.050768	0.11772	0.0869473	0.0372295	0.0960283	0.0418414	0.105551
ALDH18A1	-2.8358	-2.34991	-1.95428	-1.97388	-2.61344	-2.83331	-1.92416	-1.87667	-2.25132	-1.45967	-2.06539	-2.3981	-1.91452	-1.99184	-1.8953	-1.91703	-1.60582	-1.2947	-1.38531	-2.16183	-1.40763	-1.85744	-1.84997	-1.99485	-1.6474	-1.87622	-1.68394	-1.50123
ALDH1A1	-0.433094	-0.33333	-0.400419	-0.617212	-0.349512	-0.385538	-0.455333	0.182321	-0.237179	-0.20834	-0.290581	-0.157158	-0.202352	-0.312218	-0.318612	-0.295517	-0.206195	-0.251872	-0.182924	-0.108098	-0.125501	-0.400841	-0.270921	-0.0448505	-0.530622	-0.319135	-0.239916	0.125034
ALDH1A2	-1.50878	-1.84873	-1.52582	-1.78596	-2.15956	-1.40402	-1.7686	-0.361439	-1.02763	-1.24013	-1.73563	-1.54972	-1.02888	-1.59455	-1.66241	-1.51327	-1.85241	-1.22563	-0.929969	-1.3544	-1.30951	-1.25354	-1.63575	-1.67996	-1.11582	-0.686426	-0.82862	-0.877227
ALDH1A3	0.135306	-0.0838995	0.0260207	-0.0693626	-0.0642929	0.0235035	0.0950697	-0.150088	0.0356182	0.116797	-0.134295	-0.0737579	-0.0308411	0.0967492	-0.157879	0.184581	0.0200162	-0.0131813	0.139154	-0.132888	-0.0456917	0.0035194	0.0735153	-0.204514	0.0089251	0.0545064	0.192862	0.0918243
ALDH1B1	0.231543	-0.0246149	0.038986	0.180788	-0.115124	-0.150936	0.237644	0.215939	-0.279031	-0.0851397	0.144441	0.135239	-0.0189274	-0.183959	0.136988	0.2312	0.0629686	-0.0464282	0.193555	0.112035	0.190074	0.125694	-0.0296799	-0.121988	0.191232	0.162054	0.225665	0.128902
ALDH1L1	0.351252	0.239351	0.187123	0.354505	0.321631	0.279325	0.139177	0.11149	0.500152	0.212489	0.302946	0.342576	0.313831	0.324025	0.270095	0.219083	0.482576	0.316188	0.262176	0.223594	0.318618	0.31574	0.493	0.501744	0.388523	0.289744	0.201908	0.289376
ALDH1L2	0.0123642	-0.0433831	0.244285	0.192127	-0.0858506	-0.13281	0.0731774	0.0870514	-0.125507	-0.0117289	-0.00611739	-0.0472716	0.000787443	0.0205861	-0.099748	-0.0292289	-0.128779	-0.123881	-0.073931	-0.0887788	-0.00253349	-0.0546202	-0.00339684	-0.113786	-0.0678863	-0.0672151	-0.0642301	-0.0696364
ALDH3A2	0.112696	0.139774	0.186209	0.25802	0.404288	0.164908	0.112498	0.201335	0.182877	-0.0941366	0.0734298	-0.0340527	0.00905361	0.0471116	0.0423294	0.0483115	-0.0906442	-0.0665613	0.00578101	0.0787931	0.0286259	0.0577726	0.168209	0.244594	-0.00611255	0.0788549	0.0282697	0.154754
ALDH3B2	-1.2314	-1.21021	-0.882506	-1.12425	-1.65765	-1.2291	-1.02805	-0.971228	-0.998163	-0.839827	-0.908722	-1.01662	-0.920005	-1.07026	-0.870263	-0.953396	-0.826053	-0.872796	-0.735745	-0.960252	-0.923702	-0.913244	-0.813468	-1.08323	-0.881848	-0.652447	-0.718745	-0.689269
ALDH4A1	0.303571	0.366125	0.180647	0.431751	0.132203	0.162825	0.666478	0.334936	0.362464	0.644869	0.408584	0.210222	0.535745	0.397417	0.500306	0.617212	0.532043	0.622964	0.766327	0.389165	0.643547	0.667017	0.483594	1.2244	0.498681	0.895316	0.578606	0.671502
ALDH5A1	0.27393	0.0481729	0.139826	0.249687	0.324489	0.266131	0.216179	0.232958	0.270586	0.187472	0.238263	0.122439	0.148896	0.148879	0.119994	0.193861	0.143057	0.153712	0.223242	0.133916	0.214774	0.257876	0.208625	0.384978	0.0997141	0.267254	0.232471	0.3218
ALDH7A1	-0.993141	-1.09739	-0.803531	-0.951015	-1.23297	-0.895265	-1.13321	-0.906659	-0.648357	-0.655708	-1.03759	-0.755218	-0.675503	-0.827158	-0.681276	-0.689453	-0.670327	-0.808608	-0.882351	-0.78143	-0.662262	-0.598933	-0.75273	-0.850238	-0.484992	-0.61208	-0.889371	-0.503871
ALDH9A1	-1.06916	-0.810339	-0.720694	-0.645558	-0.86161	-0.768967	-0.670037	-0.624459	-0.508511	-0.559642	-0.382083	-0.632084	-0.543436	-0.222434	-0.294651	-0.0473357	-0.0791327	-0.24929	-0.182359	-0.18127	-0.181796	-0.0767659	-0.0394584	-0.162263	0.0401291	0.0934712	-0.184845	0.0987552
ALDOB	0.36738	0.175088	0.405972	0.635666	0.397037	0.42788	0.332461	0.385838	0.348946	0.242483	0.410795	0.267307	0.344308	0.346894	0.333923	0.436558	0.63318	0.53699	0.481683	0.512718	0.603051	0.395656	0.512766	0.593941	0.550681	0.428008	0.390031	0.262802
ALDOC	0.504839	0.127458	0.386693	1.17713	0.345913	0.519608	-0.150775	0.474607	0.605609	0.449664	0.579141	0.649864	0.704191	0.313448	0.174871	0.694701	1.14468	0.531808	0.709284	0.723889	0.889493	0.929411	0.486416	1.41203	0.958344	0.796177	0.664053	0.78708
ALG10	0.58525	0.506338	0.401436	0.536089	0.503723	0.471739	0.341051	0.402824	0.579453	0.503566	0.607164	0.516668	0.457703	0.458017	0.544754	0.26369	0.298688	0.21757	0.336677	0.321304	0.24101	0.308059	0.562406	0.243562	0.0860919	0.187451	0.363387	0.402365
ALG10B	-0.871593	-0.354651	-0.0691498	-0.389168	-0.480686	-0.623332	-0.472024	-0.155843	-0.631035	-0.40559	-0.374844	-0.567512	-0.482321	-0.372897	-0.541511	-0.432997	-0.256752	-0.443643	-0.413954	-0.291463	-0.274828	-0.484382	-0.363332	-0.208126	-0.339746	-0.291714	-0.285337	-0.28323
ALG12	0.245023	0.199885	0.24544	0.325793	0.231595	0.191946	0.233037	0.0294477	0.155538	0.3454	0.155296	0.273002	0.0759927	0.283522	0.196988	0.271209	0.250192	0.139817	0.192601	0.214198	0.17907	0.208203	0.229357	0.213367	0.214613	0.12692	0.102893	0.199235
ALG13	0.145166	0.139044	-0.0409635	-0.0516488	-0.201537	-0.361694	-0.280224	-0.244038	-0.308866	-0.31229	-0.178264	-0.216733	-0.13402	-0.1813	0.0394335	-0.118586	-0.194718	-0.202244	-0.0793806	-0.0377814	-0.017904	-0.0557802	-0.26521	-0.350991	-0.0448138	-0.0401536	0.0705274	-0.0727913
ALG14	-0.200836	-0.183414	-0.104592	-0.129649	-0.210457	-0.067751	-0.198178	-0.125933	-0.325817	-0.16214	-0.238478	0.0246507	-0.261856	-0.190711	-0.136252	-0.150674	0.022314	-0.000700539	0.0526669	-0.0572014	0.0472939	-0.102395	-0.139723	0.190989	-0.292618	-0.025228	-0.225093	-0.134856
ALG3	0.0321265	0.298743	-0.176451	-0.268214	0.128297	-0.540847	0.121653	-0.415961	-0.0784873	-0.109333	0.0842262	-0.0879596	-0.0235345	-0.291589	0.0720512	-0.0167346	-0.167786	-0.171506	-0.137632	-0.257101	-0.140257	-0.458826	-0.267099	0.0308122	-0.353286	-0.00697851	-0.096198	0.0065312
ALG5	-1.19239	-0.647825	-1.01904	-1.32264	-1.27187	-1.46968	-0.764215	-1.1027	-1.41275	-0.7414	-1.01727	-1.06573	-0.770418	-1.36696	-0.860073	-1.23383	-1.00096	-0.792698	-1.07535	-1.26642	-1.2281	-1.32956	-1.48236	-1.78539	-1.06136	-1.26112	-1.24058	-0.966679
ALG9	-1.38891	-0.78549	-0.941885	-0.843244	-1.18089	-1.05559	-0.818348	-0.732506	-1.19347	-0.800408	-0.730301	-0.919759	-0.849422	-0.978659	-0.687091	-0.770786	-0.715428	-0.76927	-0.630806	-0.783718	-0.834966	-0.830289	-0.727225	-0.967491	-0.81563	-0.824953	-0.688748	-0.753105
ALK	0.0366147	0.0945732	0.112121	0.227041	0.117254	0.368403	0.193558	0.131509	0.00149305	0.292985	0.0146461	0.33747	0.0058497	0.162084	-0.0830483	0.162234	-0.0255008	0.0806351	0.208901	0.0408697	-0.0760693	-0.0797681	0.256559	-0.0720835	0.0970295	-0.0731565	-0.0354058	-0.023689
ALKBH1	-0.219906	0.0477157	-0.0212601	-0.166637	-0.157752	-0.186234	0.049168	-0.0110377	-0.143356	-0.162653	0.0643741	-0.00236218	-0.152032	0.0542534	-0.04069	0.0169496	-0.0956386	-0.0289164	0.156537	-0.0366093	0.037936	-0.0248641	0.0512965	-0.178707	0.0458635	0.0149026	0.125378	-0.0731427
ALKBH3	0.89261	0.764059	0.613238	0.414615	0.679476	0.760049	0.77291	0.641494	0.86157	0.655315	0.60335	0.875732	0.787401	0.942356	0.782569	0.793305	0.605351	0.682913	0.373342	0.753197	0.621272	0.590692	0.589099	0.729784	0.54863	0.542935	0.498964	0.423088
ALKBH3-AS1	0.499493	0.553155	0.54526	0.47152	0.676294	0.461328	0.387941	0.432045	0.407765	0.338678	0.542967	0.309238	0.520953	0.359977	0.230901	0.113538	0.0960832	0.161353	0.168012	0.191269	0.386642	0.17323	0.447116	0.263242	0.232457	0.203658	0.128995	0.270024
ALKBH5	-0.0413194	0.0591911	0.0487498	0.329568	0.155585	0.0852133	0.166537	0.115393	0.32768	0.184385	0.183781	0.0718142	0.492841	0.35635	0.412937	0.417507	0.478354	0.414101	0.395823	0.333016	0.421818	0.166143	0.332513	0.299258	0.331324	0.568299	0.511832	0.404481
ALKBH6	-1.25966	-1.05283	-1.72113	-1.18782	-1.01972	-1.18777	-1.1148	-0.902516	-1.3244	-1.15612	-1.35904	-1.20473	-1.22028	-0.793497	-0.962809	-1.43939	-1.00411	-0.899902	-0.955508	-1.0228	-1.14987	-0.613293	-1.0265	-1.08085	-1.14765	-1.11378	-1.21856	-0.981222
ALKBH8	-0.579901	-0.531287	-0.454353	-0.462538	-0.460714	-0.409407	-0.311717	-0.487723	-0.523296	-0.378421	-0.480954	-0.448528	-0.335857	-0.283993	-0.180721	-0.427434	-0.454985	-0.443763	-0.502749	-0.354784	-0.394102	-0.178762	-0.236268	-0.0252146	-0.20193	-0.159513	0.0637541	-0.313383
ALLC	0.181241	0.216492	0.225	0.29136	0.176357	0.210156	0.253481	0.180516	0.165156	0.162483	0.210975	0.113876	0.15548	0.0354108	0.128015	0.00944823	0.0208759	0.0189154	-0.17563	0.0244973	0.0594378	0.0137804	0.137943	0.0314134	-0.00209612	0.125676	0.0640969	0.0184356
ALMS1	-0.842378	-1.02183	-1.5125	-1.40161	-0.852416	-1.36494	-1.18907	-0.9607	-1.13546	-0.947728	-0.942432	-1.01919	-1.14768	-0.562938	-0.88429	-1.02515	-0.961334	-0.830614	-1.1374	-0.783834	-1.00755	-0.780318	-0.829927	-0.637805	-0.575913	-0.933497	-0.901094	-0.889386
ALOX12B	0.371945	0.546932	0.52982	0.35698	0.240268	0.215057	0.495533	0.183804	0.410124	0.465376	0.330632	0.448469	0.276509	0.167511	0.333751	0.353015	0.250533	0.161438	0.369342	0.203476	0.287691	0.129433	0.233083	0.104173	0.292866	-0.0668785	0.355878	0.179284
ALOX12P2	-0.227121	0.00723454	0.0247022	-0.275088	-0.168656	-0.388735	-0.0403829	-0.226775	-0.0911151	-0.263522	-0.183333	-0.214905	-0.125394	-0.254894	-0.0976596	-0.326098	-0.123776	0.100882	-0.187565	-0.00946007	-0.172671	-0.238929	-0.396559	-0.290695	-0.287369	-0.144215	-0.253425	0.0440921
ALOX5	0.166205	-0.0383588	-0.00129077	0.0194849	-0.129277	-0.0314041	0.0561665	0.0274671	-0.0123886	-0.0376567	0.0187208	0.0706565	-0.00903034	0.170636	-0.0564469	-0.113956	-0.071403	0.209015	0.329672	0.0170859	-0.157041	-0.0622204	0.00626879	0.167608	0.102135	0.185044	0.170237	-0.0293808
ALOX5AP	0.0528908	0.216536	0.32176	0.243154	0.563693	0.415086	0.512069	0.648175	0.387828	0.871455	0.0692649	0.349958	0.168927	0.0987852	0.139961	0.0947756	-0.0429365	-0.0273086	0.00883815	0.144277	0.22462	0.00610657	0.263346	0.268047	0.101246	-0.0708113	0.188851	0.270299
ALPK1	-0.00265386	-0.0833946	0.0271843	0.139732	0.387295	0.187587	0.211631	0.0795416	0.0670234	0.118349	0.0674667	0.0882728	-0.011368	0.218583	0.0102179	-0.0490366	0.442131	-0.0045988	-0.0479262	0.0989081	0.180485	-0.144241	0.0491313	0.187771	0.0199366	0.099387	0.033122	0.163853
ALPL	0.443481	0.130738	0.314269	0.456505	0.293118	0.412788	0.381366	0.460278	0.198547	0.257107	0.205262	0.027992	0.077523	0.166443	0.157391	0.257913	0.471623	0.0472469	0.0154609	0.191282	0.22142	0.23677	0.207754	0.512394	0.139618	0.11433	0.0220881	0.124561
ALPPL2	0.433404	0.269028	0.261737	0.242013	0.232509	0.308709	0.282546	0.206189	0.337471	0.238698	0.278198	0.315084	0.392096	0.576483	0.164794	0.294126	0.342517	0.298904	0.274597	0.225013	0.344136	0.231086	0.273734	0.246235	0.18141	0.201078	0.267841	0.265
ALS2	0.204964	-0.01237	0.264794	0.131055	0.152763	0.243115	0.058091	0.159744	-0.0355043	0.0130838	0.045806	0.108612	0.00379036	-0.0117848	0.102888	-0.0502656	-0.196186	-0.18576	-0.120026	-0.0369553	0.194071	0.0616276	-0.150209	0.0755409	0.147512	0.053028	-0.0931093	0.142595
ALS2CL	-0.266051	-0.388423	-0.232301	-0.244869	-0.159896	-0.336869	-0.505067	-0.341457	-0.506745	-0.413082	-0.625449	-0.416643	-0.535611	-0.389025	-0.568464	-0.57154	-0.869668	-0.837423	-0.606567	-0.57705	-0.499328	-0.364551	-0.582342	-0.584732	-0.450155	-0.606332	-0.59702	-0.407061
ALS2CR11	0.221257	0.135368	0.336842	0.204774	0.354403	0.363045	0.0562386	0.314356	0.288315	0.173147	0.183919	0.105043	0.189517	0.232502	0.10052	0.177948	0.0848817	0.0512872	0.068281	0.0537976	-0.0109426	0.0675752	0.159149	0.0439886	0.0680192	0.0720836	0.146832	0.130089
ALS2CR12	0.291656	0.399187	0.482612	0.155249	0.395958	0.256129	0.215906	0.164014	0.133158	0.169627	0.265901	0.249911	0.180504	-0.00193218	0.229323	0.171138	0.143376	-0.00214906	0.117371	0.215768	0.131894	0.182135	0.313423	0.34327	0.208352	0.066	0.190546	0.183492
ALX4	0.223772	0.0927033	-0.0143981	0.214291	0.295717	0.211257	0.182938	0.378003	0.183224	0.157086	0.175264	0.128383	0.00914001	0.29817	0.184257	0.13942	0.274123	0.2236	0.300896	0.24439	0.330684	0.244681	0.333599	0.0830897	0.326528	0.0941685	0.265684	0.22048
ALYREF	-0.115347	-0.481824	0.479272	-0.0309737	0.27148	0.236078	0.258505	0.14776	0.0951782	-0.064506	-0.158029	-0.000103602	-0.122145	-0.00627896	0.32744	0.0503868	-0.0768991	-0.204122	-0.128236	-0.145625	-0.108592	-0.0544222	0.232191	0.323535	0.0911987	-0.0125458	0.216809	0.0254073
AMACR	0.139659	0.122899	0.175554	0.244101	0.185646	0.140797	0.213571	0.253541	0.245895	0.154249	0.246307	0.114222	0.0267025	0.183686	-0.0352564	0.177816	-0.198761	0.0414008	0.0224879	0.188054	0.229182	0.0570123	0.0593273	0.111185	0.100983	0.0679821	0.196876	0.0632998
AMBP	-0.717138	-0.530113	-0.674748	-0.62806	-0.864913	-0.789095	-0.644448	-0.648476	-0.571525	-0.558193	-0.872639	-0.749614	-0.34871	-0.757723	-0.605373	-0.86219	-0.643113	-0.64903	-0.643684	-0.816501	-0.836674	-0.977456	-0.818357	-1.23697	-0.736676	-0.916154	-0.682864	-0.951857
AMBRA1	0.0982801	0.0121199	-0.0715949	-0.11563	0.0881883	-0.176535	-0.108527	0.0239909	-0.318299	-0.377928	-0.399984	-0.120554	-0.244669	-0.166872	-0.101477	-0.126427	-0.181039	-0.19222	-0.304484	0.0684773	0.0205026	0.0333987	-0.0557877	-0.196837	0.0388303	0.0221308	0.0202467	-0.143798
AMD1	0.16068	0.345726	0.0216002	0.223582	0.273273	0.436627	0.0814006	0.240302	0.626938	0.139135	-0.0407132	0.0112871	0.184381	0.242892	-0.0487813	0.179486	0.28185	0.153217	0.339917	0.298031	0.175457	0.0130946	0.30096	0.347056	0.0997891	0.00873485	0.0259033	0.204233
AMDHD1	0.159502	0.400548	0.285123	-0.0241824	0.0997926	0.139514	0.11391	-0.16174	0.10988	0.0997847	-0.0480434	0.205754	0.345507	-0.0646026	0.0137926	0.0257302	-0.0572989	0.176421	-0.0509721	-0.0611263	0.205551	0.271717	0.125738	-0.0314679	0.140194	-0.019752	-0.386061	-0.143139
AMDHD2	0.238134	-0.130298	0.0283722	-0.11687	-0.243486	0.129114	0.349879	-0.147598	0.195455	0.168315	-0.186741	0.193341	0.218182	0.292206	0.372334	0.416724	0.385883	0.332928	0.377022	0.225617	0.37506	0.478496	0.635901	0.552224	0.166671	0.460922	0.491967	-0.0931176
AMER2	-0.242108	0.141392	-0.0604625	0.0742451	-0.170785	0.0331147	0.0128543	-0.116529	-0.0712672	-0.0616484	-0.0749379	-0.171799	-0.0807566	-0.0443258	0.0293361	0.0719267	-0.207888	0.0197832	-0.0350523	0.0148385	0.0281848	0.0677832	0.262132	-0.101688	0.098489	0.0733145	-0.0518854	0.0172511
AMFR	-0.351169	-0.232568	-0.45369	-0.183805	-0.147466	-0.229515	-0.0452195	-0.225151	-0.267892	-0.0737677	-0.247724	-0.0621114	-0.145207	-0.151137	-0.17591	-0.0813481	-0.122381	-0.396572	-0.218999	-0.262365	-0.216855	0.0348661	-0.156475	-0.27514	-0.165634	-0.225043	-0.311514	-0.118844
AMH	0.265165	0.0378833	0.0905745	-0.0530014	0.245619	0.0677268	0.00179685	-0.0840837	0.268096	0.246816	0.087117	0.18379	0.322182	-0.361887	0.106216	0.180028	0.159197	0.399252	0.154336	-0.527298	0.218473	0.284452	0.16106	0.32026	0.0871129	-0.0418892	0.21337	0.0824948
AMHR2	0.179385	0.174247	0.292081	0.176636	0.0664455	0.26078	0.211226	0.0980024	0.00341162	0.251493	0.181301	0.248978	0.143061	0.208549	0.162073	0.224917	0.197976	0.280096	0.121263	0.162646	0.117079	0.147421	0.430544	0.321914	0.344559	0.145638	0.437868	0.141695
AMIGO1	0.395976	0.370864	0.337127	0.430477	0.479655	0.42315	0.337938	0.341913	0.673137	0.514659	0.423834	0.570129	0.425515	0.371638	0.354291	0.196677	0.311755	0.313355	0.325828	0.289817	0.278996	0.208908	0.295278	0.403309	0.223759	0.278902	0.330829	0.256189
AMIGO2	-0.790915	-0.487821	-0.73783	-0.656116	-0.441581	-0.5944	-0.567969	-0.615174	-0.764142	-0.589429	-0.442964	-0.529995	-0.523809	-0.606853	-0.337149	-0.422555	-0.532528	-0.450547	-0.461168	-0.487037	-0.544659	-0.447036	-0.444079	-0.22916	-0.449649	-0.294818	-0.575362	-0.553589
AMMECR1	0.115176	0.115522	0.21729	0.0657356	0.216909	0.153036	-0.0198306	0.112038	0.22018	0.109385	0.0932421	0.095836	0.0894421	0.0876088	0.0761656	-0.0318845	-0.000580234	0.183576	0.100885	0.0164184	0.126439	0.173067	0.195141	0.0112299	-0.00168057	0.158647	0.0815518	0.00641083
AMMECR1L	0.00448145	0.0140805	-0.17469	0.131987	-0.102618	-0.15145	-0.0382617	-0.287443	-0.341179	-0.0943913	-0.387377	-0.143085	-0.130436	-0.400027	-0.115985	-0.426916	-0.236246	-0.229256	-0.205765	-0.26411	-0.364058	-0.175186	-0.157547	0.0182058	-0.264529	-0.0672441	-0.137698	-0.126247
AMOT	-0.32673	-0.124022	-0.201118	-0.739969	-0.584517	-0.731611	-1.02814	-0.545833	-0.84378	-0.628914	-0.71245	-0.582819	-1.04598	-1.10977	-0.903463	-0.88812	-1.01049	-0.605506	-1.04556	-1.13139	-0.728981	-0.580045	-0.710788	-0.844124	-0.758477	-0.724849	-0.931513	-0.444653
AMOTL1	0.364179	0.0730374	0.0683864	0.119933	0.22833	0.098649	0.248867	0.398734	0.50102	0.374732	0.237546	0.368463	0.178479	0.339023	0.131233	0.313329	0.565584	0.509659	0.412236	0.348956	0.439813	0.338706	0.455417	0.310935	0.360819	0.162845	0.325893	0.191572
AMOTL2	-0.158992	0.159182	-0.373844	-0.60423	-0.29484	-0.517141	0.267001	-0.32853	-0.363751	-0.213191	0.199241	-0.045249	-0.707427	-0.117835	0.043443	0.203058	0.0684714	0.220949	0.578829	0.372232	0.723326	0.326786	0.341929	0.210705	0.00370008	0.376727	0.506689	0.0219845
AMPD1	-0.127385	0.274071	0.109955	0.0990909	0.0669782	-0.13012	-0.0353956	-0.034828	0.122787	0.0345514	0.0703431	-0.136871	-0.00248772	-0.116745	-0.0616858	-0.154438	-0.2516	-0.332896	-0.204972	-0.0977474	-0.119865	0.0329612	0.116894	0.0398468	0.0328249	-0.0745396	0.104153	0.114015
AMPD2	-0.190471	-0.228402	0.34674	-0.00620055	0.321678	-0.0662258	0.0399437	-0.0446192	-0.159986	0.0995395	0.0403882	-0.126679	-0.0158718	-0.309486	0.0639719	-0.185424	-0.171116	-0.0666632	-0.153306	-0.104072	-0.079999	-0.0428787	-0.156932	-0.184191	-0.00925516	0.0312338	-0.246255	0.0074687
AMPD3	-0.225827	-0.209179	0.0183217	-0.358955	0.0313535	-0.324625	0.0222956	-0.185236	-0.136864	-0.128611	-0.313599	-0.000542285	-0.205973	-0.36746	-0.117067	-0.195682	-0.301522	-0.257228	-0.587675	0.0359169	-0.202364	-0.220451	-0.214892	-0.241477	-0.261665	-0.0724023	0.114697	-0.235425
AMPH	0.0672503	0.0916208	0.153337	0.0225096	-0.044314	0.0175551	0.198264	0.0290301	-0.0984193	0.160965	-0.0222227	0.124574	0.144846	0.0106182	0.0950925	-0.0404131	0.0563327	0.0415021	0.0548812	0.0115577	0.0452579	0.227635	0.0144789	0.300089	0.299533	0.40349	0.327852	0.146292
AMT	0.548093	0.202986	0.178197	0.160225	0.177079	0.314033	0.243756	0.242464	0.200374	0.381523	0.185806	0.385129	0.130965	0.2574	0.172108	0.265668	0.291597	0.111874	0.187026	0.161231	0.229144	0.220791	0.365286	0.34862	0.291702	0.359399	0.363726	0.208905
AMY2B	0.133654	-0.0690595	0.0166365	-0.128533	0.151839	0.378291	-0.459687	0.0911975	-0.273244	0.0680363	-0.0479503	-0.0706957	-0.0896942	-0.225504	-0.427449	-0.114472	0.166888	-0.114208	-0.0135867	0.0969479	0.180406	0.164801	0.174407	0.137435	0.0146387	-0.0660392	-0.112191	0.177208
AMZ1	0.308049	0.271269	0.414992	-0.0606002	0.193637	0.467069	0.108433	0.0971415	0.70487	0.544278	0.571066	0.336857	0.474736	0.531833	0.465245	0.303004	0.514705	0.405413	0.300392	0.360378	0.676892	0.451671	0.429027	0.45805	0.450318	0.579945	0.666927	0.599949
AMZ2	-0.630928	-0.704155	-0.254779	-0.138175	-0.328785	-0.43913	-0.510292	-0.0901893	-0.238307	-0.509627	-0.383172	-0.483481	-0.371535	-0.306775	-0.421057	-0.151039	-0.0571179	-0.281629	-0.481599	-0.266457	-0.41274	-0.259155	-0.246867	-0.227399	-0.13164	-0.300836	0.00752594	-0.176442
ANAPC1	-1.12007	-1.11435	-0.920552	-0.961117	-1.24086	-1.06257	-0.849575	-0.682531	-1.30649	-0.893793	-1.11265	-1.03829	-0.916545	-0.99564	-0.871395	-0.928069	-0.699226	-0.676213	-0.930652	-0.977448	-0.804927	-0.779049	-1.06061	-0.925917	-0.701124	-0.781209	-0.891497	-0.80927
ANAPC10	0.320539	0.353298	0.611832	0.240948	0.508114	0.27818	0.477508	0.375061	0.551334	0.483918	0.318274	0.365496	0.360363	0.14957	0.554338	0.600017	0.405658	0.482078	0.372743	0.303191	0.398085	0.417135	0.407226	0.658881	0.357103	0.531188	0.512071	0.351244
ANAPC11	-0.00546365	-0.15474	-0.114756	0.0870449	-0.170862	0.0703814	-0.443875	-0.482074	-0.201104	-0.193658	-0.246529	0.170874	0.0332349	-0.274248	-0.0322056	-0.208656	-0.102924	-0.0513686	-0.0772465	-0.00678727	-0.307179	-0.227567	-0.0581475	0.132468	-0.0358937	-0.306761	-0.118591	-0.00340621
ANAPC13	-0.00898191	-0.117734	-0.0860743	-0.186492	-0.272126	-0.32693	-0.030074	-0.218025	-0.0772115	-0.335897	0.195449	-0.262774	0.0282143	0.0959911	0.264509	0.4923	0.363661	0.167018	0.32178	0.543107	0.259795	0.474727	0.434239	0.563292	0.296493	0.40301	0.628367	0.578378
ANAPC15	0.0822709	0.145543	0.120632	0.0922834	0.0535794	0.186047	0.030873	0.149884	0.110499	0.110327	0.149351	0.126642	0.268283	0.167223	-0.00204006	0.0681142	0.144076	0.117689	0.0519826	0.210007	0.140897	0.143127	0.142158	0.051371	-0.032113	0.126466	-0.0485118	-0.0285975
ANAPC16	0.468156	0.339184	0.4922	0.720363	0.709115	0.667529	0.446099	0.69267	0.622881	0.416222	0.477802	0.289493	0.393301	0.397856	0.369273	0.433346	0.72169	0.134728	0.407071	0.657132	0.484395	0.531214	0.554474	0.985372	0.607668	0.453172	0.432905	0.738051
ANAPC5	-0.637212	-0.596429	-0.5103	-0.693812	-0.501645	-0.736718	-0.579862	-0.631132	-0.673044	-0.472743	-0.659692	-0.448546	-0.717796	-0.546309	-0.611779	-0.481468	-0.501287	-0.606635	-0.50241	-0.489955	-0.793625	-0.559352	-0.528722	-0.688132	-0.472651	-0.651734	-0.703153	-0.703961
ANGEL1	-0.0947973	-0.205422	-0.0404932	-0.189844	0.0567765	0.06095	-0.069885	0.0466396	-0.0825189	-0.261028	-0.440429	-0.292367	-0.454278	-0.219223	-0.332054	-0.134245	-0.313403	-0.584789	-0.495547	-0.375526	-0.176785	-0.327982	-0.4076	-0.426036	-0.298241	-0.501637	-0.496509	-0.283179
ANGEL2	-0.514014	-0.591327	-0.457752	-0.59513	-0.484835	-0.577382	-0.486018	-0.397366	-0.424122	-0.385344	-0.672219	-0.558545	-0.52212	-0.308068	-0.597992	-0.622453	-0.542352	-0.679199	-0.644853	-0.584225	-0.525093	-0.51399	-0.548831	-0.497237	-0.443652	-0.513313	-0.641236	-0.55409
ANGPT2	0.26829	0.113192	0.309624	0.251882	0.196252	0.16069	0.146758	0.140636	0.12385	0.147145	0.0885464	0.18128	0.102682	0.195781	0.0312905	0.107919	0.0912159	0.0623608	0.112798	0.0748556	0.087676	0.142842	0.1296	0.0854167	0.103761	0.0895392	0.121768	0.0658051
ANGPTL1	-0.153917	0.105832	-0.0393732	-0.199649	-0.0230417	-0.085129	-0.251286	-0.180873	0.0328147	-0.0121025	-0.0904889	-0.144356	-0.128023	-0.0300807	-0.071118	-0.131583	-0.289378	-0.232203	-0.227697	-0.185349	-0.308749	-0.118439	-0.322611	-0.0505333	-0.083966	-0.0798312	-0.254622	-0.379138
ANGPTL2	-0.418002	0.0413911	0.0927246	0.396797	-0.0638455	0.0347145	0.310486	0.150524	0.0112851	0.18927	0.0658396	0.0673193	0.296416	0.242941	0.249064	0.170847	0.0889103	0.167821	0.0452677	0.0891942	0.204839	0.221343	0.108151	0.109172	-0.00928532	0.211329	0.0352244	0.618132
ANGPTL3	0.735319	0.537979	0.943757	0.26276	0.543429	0.840538	0.414049	0.509431	0.938919	1.42499	0.599798	0.948865	0.917731	0.742713	0.554452	0.398619	0.369232	0.167015	0.315743	0.270257	0.843245	0.560119	0.303667	0.273914	0.584703	0.835916	0.985618	0.541052
ANGPTL4	0.0377026	0.128138	-0.151018	0.1917	0.0216673	0.218776	0.148775	0.157162	0.0101138	0.305851	0.125074	0.268	0.207719	0.20973	0.193549	0.108624	0.360339	0.23524	0.0784685	0.179781	0.188117	0.1852	0.184081	0.252312	0.0650647	0.120818	0.514618	0.174301
ANGPTL7	0.0573367	0.175556	0.185074	0.2253	0.210002	0.198204	0.193831	0.139322	0.0965834	0.0417295	0.300998	0.135782	0.130292	0.26999	0.17133	0.129024	0.113654	0.108382	0.0550285	0.203959	0.100696	0.12985	-0.0729889	0.150478	0.0891383	0.142148	0.0441194	0.0201104
ANHX	0.0375176	0.0714742	-0.19152	-0.0842203	0.279799	-0.0860142	0.0551306	-0.0221884	0.0567497	0.0866187	0.0703459	-0.123708	-0.0904588	-0.0492055	-0.0466639	-0.0836644	-0.0629546	0.0794035	0.233048	-0.030788	-0.108844	0.112582	0.175527	0.455033	0.251721	0.335346	0.244426	-0.0221953
ANK1	0.648644	0.498198	0.690268	0.864561	0.770493	0.755889	0.721253	0.50013	0.792336	0.663243	0.731722	0.559357	0.646136	0.617789	0.342385	0.459969	0.381229	0.457115	0.455542	0.49251	0.630126	0.588485	0.566778	0.434556	0.51566	0.510263	0.631311	0.52849
ANK3	-0.221474	-0.262477	-0.264467	-0.255414	-0.15183	-0.163894	-0.23294	-0.0631255	-0.299779	-0.112544	-0.317748	-0.169468	-0.198997	-0.0863806	-0.131264	-0.339571	-0.158844	-0.140805	-0.312865	-0.216087	-0.343299	-0.217009	-0.271527	-0.106799	-0.251014	-0.23233	-0.269949	-0.17225
ANKDD1A	0.310569	0.518129	0.328373	0.156781	0.217816	0.19379	0.247865	0.286873	0.679822	0.481731	0.321552	0.45545	0.529958	0.523699	0.273408	0.257946	0.406148	0.275245	0.387304	0.219953	0.378452	0.623957	0.397739	0.209564	0.294919	0.462574	0.525978	0.281028
ANKDD1B	-0.0695061	0.00111128	-0.0110589	-0.126723	0.0218376	-0.126083	-0.00260951	0.0909525	-0.134912	-0.127245	0.112053	-0.17441	0.00123946	-0.134802	-0.176094	-0.151111	-0.023474	-0.136702	-0.140871	-0.135854	-0.00457709	-0.11283	-0.124375	0.045953	-0.211094	-0.0607161	0.0806463	-0.229348
ANKEF1	-0.831083	-0.876958	-0.662317	-0.595563	-0.882479	-0.90551	-0.845499	-0.589942	-0.609385	-0.633347	-0.792274	-0.490106	-0.269081	-0.564855	-0.877875	-0.854307	-0.471578	-0.564979	-0.815239	-0.782756	-0.527206	-0.534308	-0.563187	-0.773505	-0.84842	-0.711895	-0.678384	-0.772687
ANKFY1	0.0111283	0.00821968	0.172065	0.00293642	0.120958	0.023871	-0.0125942	0.230774	-0.0762751	-0.0301776	0.0344842	-0.0201326	-0.051221	0.00284828	0.0190094	-0.157972	0.0377221	-0.0460078	-0.0787956	-0.0222359	0.0183471	-0.0956375	0.00602978	-0.0923547	-0.0908454	-0.0214237	-0.104761	-0.139037
ANKH	-0.0946333	-0.0270707	-0.153621	-0.0530895	0.00188157	-0.0775348	-0.190183	0.0222351	0.103604	-0.138625	-0.0346086	0.097865	-0.0371708	-0.129542	-0.124428	0.0216179	-0.145775	-0.0486331	-0.0988704	-0.0499614	-0.160645	-0.123908	-0.189152	-0.00358397	-0.0780256	-0.0317332	-0.077631	-0.122769
ANKHD1-EIF4EBP3	-0.0997533	-0.0208491	0.120141	0.00246829	-0.13883	-0.0216127	0.00734602	0.0584877	-0.0467127	-0.0401199	-0.110493	-0.11328	-0.0948415	0.0735734	-0.0574227	-0.076721	-0.199067	-0.168288	-0.0719337	-0.0686995	-0.0205058	-0.0780899	-0.0320017	-0.0519337	0.0228991	-0.118833	-0.108094	0.0555342
ANKIB1	-0.540153	-0.350398	-0.253711	-0.585612	-0.312149	-0.443703	-0.676193	-0.597195	-0.667117	-0.708714	-0.522062	-0.413639	-0.506606	-0.583361	-0.704237	-0.493678	-0.61879	-0.34429	-0.315834	-0.00304456	-0.423452	-0.406345	-0.758804	-0.792103	-0.313437	-0.53939	-0.763188	-0.386586
ANKLE1	-0.144935	-0.217773	-0.321212	-0.493395	-0.150482	-0.343652	-0.496569	-0.505515	-0.561986	-0.496328	-0.554585	-0.467072	-0.369362	-0.635607	-0.752301	-0.303866	-0.597204	-0.752023	-0.595315	-0.310728	-0.262864	-0.553025	-0.25522	-0.348709	-0.242606	-0.300836	-0.520435	-0.376896
ANKMY1	-0.6083	-0.611942	-0.546215	-0.537802	-0.541345	-0.65704	-0.748972	-0.43878	-0.841763	-0.383498	-0.767777	-0.236359	-0.32415	-0.658946	-0.229471	-0.217418	-0.441324	-0.352931	-0.32973	-0.386981	-0.398316	-0.287985	-0.223215	-0.1849	-0.40299	-0.0400759	-0.212792	-0.386419
ANKMY2	-0.0632765	-0.219727	-0.0356421	-0.225799	-0.277378	-0.100937	-0.283121	0.00775506	-0.205254	-0.379435	-0.233879	-0.0814387	-0.241864	-0.161166	-0.102405	0.0903581	0.0932939	0.00328077	0.047164	0.057086	0.0449772	-0.0803978	0.00810824	0.096826	0.0600595	0.0268558	0.0774678	0.0811621
ANKRA2	-0.176436	-0.108635	-0.105723	-0.217188	-0.154328	-0.349358	-0.286153	-0.402535	-0.198986	-0.157744	-0.180483	-0.113238	-0.0843577	-0.337804	-0.224628	-0.123624	-0.182285	-0.0798265	-0.238226	-0.112024	-0.256182	-0.0579142	-0.193734	-0.315157	-0.149196	-0.0972332	-0.222908	-0.257365
ANKRD11	-0.0211456	0.0794708	0.192877	-0.029796	0.0967163	0.155509	0.122247	-0.0043647	0.320004	0.285209	0.157546	0.0625172	0.0366554	0.104777	-0.027391	0.220998	0.13601	0.012259	0.15238	0.20505	0.274581	0.0453422	0.0148096	0.142202	0.119575	-0.0110298	-0.050399	0.0245051
ANKRD12	-0.189926	-0.559542	-0.712929	-0.519699	-0.37486	-0.589771	-0.6442	-0.276978	-0.536514	-0.633378	-0.615122	-0.44395	-0.650074	-0.341062	-0.417794	-0.55468	-0.570008	-0.561288	-0.680303	-0.404004	-0.571364	-0.549667	-0.561997	-0.533437	-0.41831	-0.652659	-0.557168	-0.571901
ANKRD13A	-0.15175	-0.200856	0.0136917	-0.0106142	-0.00791885	0.0491724	-0.162018	0.104743	-0.25624	-0.0242406	-0.148907	-0.177479	-0.308535	-0.0495312	-0.0561214	-0.161839	-0.2438	-0.0391696	-0.242137	-0.00522505	0.176182	-0.00122819	0.0310429	-0.121558	0.0846944	-0.208316	-0.017319	-0.301448
ANKRD13C	-0.372835	0.16324	-0.43151	0.379656	-0.579761	-0.560434	0.59104	-0.569431	-0.271827	0.155484	0.483513	-0.364399	-0.0351876	-0.0931941	-0.382752	0.27132	-0.187768	0.0849346	0.354891	-0.0123899	-0.152976	-0.0622163	-0.54081	-0.0425628	-0.0937351	0.169987	0.4425	-0.144688
ANKRD13D	-0.41774	-0.0436494	-0.355635	-0.510984	-0.12442	-0.303019	-0.119847	-0.120386	-0.195449	-0.562821	0.151	0.0105596	-0.0855878	-0.29702	-0.201404	-0.302393	-0.2819	-0.221391	-0.168472	-0.0918801	-0.155259	-0.181524	-0.0138815	-0.388815	-0.335803	-0.150484	0.0498735	-0.196434
ANKRD17	-0.556622	-0.408229	-0.55737	-0.623853	-0.649189	-0.611123	-0.46083	-0.58383	-0.567324	-0.507323	-0.532053	-0.52632	-0.558294	-0.414073	-0.328395	-0.390518	-0.430642	-0.450412	-0.389245	-0.526429	-0.483975	-0.44077	-0.421924	-0.44588	-0.472964	-0.517877	-0.457298	-0.512443
ANKRD18A	-0.300905	0.208765	0.365874	0.597545	0.249249	0.0535862	0.453776	0.279593	0.416017	0.403816	0.473128	0.0663649	0.266462	0.0204174	0.325829	0.0480693	0.127268	0.150902	0.517157	0.0148902	0.113658	0.058567	0.20339	-0.145743	0.058975	0.0296691	0.0978379	0.238732
ANKRD2	1.95741	0.569888	0.385399	1.20733	0.880379	0.701907	4.25744	-0.192881	0.920229	0.961747	2.43406	0.580323	0.636816	1.32078	0.752041	2.07244	0.644824	1.87404	1.66449	2.03201	1.49355	1.49988	1.798	2.44727	0.56997	1.85658	1.92768	0.00366727
ANKRD20A5P	0.0180681	0.174599	0.124482	-0.0974781	0.0318139	-0.204844	0.0645507	0.00699282	0.0327722	0.0162752	0.0868564	-0.203657	0.00909986	-0.100735	-0.00619745	-0.166124	0.0633716	0.164851	-0.17092	-0.0317999	-0.127543	0.0311014	0.122177	0.0639579	-0.211304	-0.057428	0.0540832	0.00260084
ANKRD23	-0.499117	-1.11194	-0.692444	-0.179823	-0.448754	-0.607563	-1.35251	-0.637487	-0.15366	-0.563853	-0.6427	-0.276453	-0.33026	-0.457868	-0.319803	-0.380444	0.0190168	-0.0683457	-0.481781	-0.064055	0.0609501	-0.298752	-0.396185	-0.0904404	-0.140969	-0.170687	-0.766613	0.473829
ANKRD26	0.447388	0.256663	0.273761	0.098773	0.356768	0.21394	0.458385	0.144256	0.27346	0.0105792	0.187566	-0.0259908	0.198457	0.169626	0.1918	-0.0103624	-0.0200498	0.0503041	0.322253	0.128795	-0.0544228	-0.152989	0.212413	-0.0440498	0.33368	-0.0100043	0.16051	0.142445
ANKRD26P1	0.146669	0.134879	0.436371	0.21134	0.32047	0.194317	0.105445	0.247896	-0.00773565	0.208335	0.238078	0.220078	0.073948	0.289968	0.126068	0.0342665	-0.150032	0.0340444	0.283	0.185263	0.234165	-0.0657941	0.163201	0.053608	0.0229684	0.111574	0.13816	0.13438
ANKRD28	-0.1777	-0.210246	-0.0751123	-0.0940402	-0.216058	-0.155859	-0.428265	-0.349195	-0.298939	-0.130854	-0.339107	-0.241778	-0.0446834	-0.42759	-0.273098	-0.221651	-0.197836	-0.146143	-0.397935	-0.20717	-0.104835	-0.128744	-0.0087793	-0.316735	-0.06432	-0.0198609	-0.060714	-0.212873
ANKRD29	-0.259693	0.0009783	-0.0423519	0.0347993	-0.194405	-0.276775	-0.451305	-0.142229	0.0359909	-0.0895956	0.0509367	-0.0924538	0.0880717	-0.226894	-0.179292	-0.286029	0.0534109	0.0856525	-0.0846706	-0.110407	-0.0827968	0.00232493	-0.291405	-0.0972544	-0.0919787	-0.034093	-0.0859919	-0.0313952
ANKRD30A	-0.147884	-0.0109347	0.165359	-0.146064	0.0875606	0.0989906	-0.0208813	0.0388542	-0.150254	-0.308506	0.15038	0.129337	0.101086	-0.177861	-0.0695325	-0.0940517	-0.0589949	-0.169306	-0.184205	-0.122459	-0.0358117	0.09689	-0.0625496	-0.148084	0.11618	-0.049761	0.072692	0.0646763
ANKRD30BL	0.340496	0.617686	0.400203	0.446614	0.304444	0.461602	0.172852	0.236069	0.606891	0.403172	0.123475	0.251011	0.298043	0.376771	0.146751	0.0400401	0.093761	0.0869853	0.306158	0.0208467	0.435199	0.229629	0.172563	0.0560965	0.122789	0.241528	0.0728008	0.201722
ANKRD33B	-0.043942	-0.0247548	0.00431649	0.132642	-0.0720623	0.115477	0.0466512	0.0177555	-0.0647534	0.0890176	0.0861424	0.0921566	-0.0518181	-0.0629045	0.230573	0.0362225	0.15287	0.171383	0.148155	0.0479872	0.0897208	0.166673	-0.0298971	0.515213	0.0697772	0.0713254	0.452565	0.187932
ANKRD35	-0.156561	0.211135	-0.0879687	-0.108078	0.134136	-0.0378162	-0.0583163	-0.308315	0.00422704	0.0807371	-0.0775992	-0.000474335	-0.0157065	0.0267481	-0.305968	0.0592331	-0.0545829	-0.292106	-0.151782	-0.0443587	-0.208712	-0.10974	-0.370119	-0.242908	-0.134051	-0.25802	-0.160906	0.066951
ANKRD36B	0.306948	0.255991	0.490162	0.221969	0.223091	0.341316	0.212628	0.214103	0.208808	-0.00877029	0.224999	0.102443	0.105369	0.00228556	-0.0329213	-0.0273495	-0.11256	0.0753977	-0.105429	0.105244	0.0827129	0.109743	-0.0426365	-0.0878529	-0.0591149	1.31e-05	-0.152218	-0.215521
ANKRD36BP1	0.15332	0.24446	0.250168	0.0257292	0.108727	0.569649	0.0797024	0.439876	0.339353	0.40201	0.13091	0.443883	0.485918	0.268342	0.0935339	0.00533086	-0.122538	0.396069	0.17251	0.000807646	0.0751642	0.146256	0.388098	0.284714	0.189634	0.0462686	0.196238	0.288328
ANKRD37	-0.0374998	-0.232823	-0.0590017	-0.0359349	0.0409111	-0.079701	-0.140612	-0.103604	0.00927106	-0.0419309	0.0619525	-0.131427	-0.00330105	-0.124594	-0.000633178	-0.0143611	-0.00659398	-0.101883	-0.0296917	-0.120479	-0.0431182	-0.165825	0.0489747	0.0862659	-0.14709	-0.0626573	0.0916594	0.142253
ANKRD39	0.190287	0.24945	0.324092	0.407839	0.41139	0.18715	0.224232	0.219903	0.456495	0.270218	0.112692	0.396707	0.394861	0.481738	0.151699	0.411846	0.488832	0.395095	0.442098	0.11851	0.396287	0.286971	0.175138	0.481226	0.300399	0.196872	0.27817	0.252165
ANKRD40	-0.561019	-0.349423	-0.238291	-0.150181	-0.151707	-0.284387	-0.335554	-0.198095	-0.165851	-0.253565	-0.264219	-0.289384	-0.14715	-0.0814896	-0.306195	-0.280648	-0.267424	-0.246382	-0.280711	-0.407043	-0.0275804	-0.154638	-0.156214	-0.291325	-0.231811	-0.111207	-0.0607489	-0.0856739
ANKRD42	0.12731	0.223568	0.195429	0.21872	0.155128	0.328133	0.112331	0.221961	0.118252	0.271448	0.222319	0.280593	0.288091	0.169615	0.100465	0.200525	0.0877483	0.11969	0.153591	0.182476	0.0370683	0.239739	0.131438	0.0445123	0.12179	0.0919695	0.0793236	0.123216
ANKRD44	-0.236305	-0.27316	-0.187565	-0.192419	-0.315985	-0.202562	-0.21668	-0.285969	-0.342964	-0.200072	-0.152111	-0.129164	-0.193949	-0.0721585	-0.179211	-0.0368436	-0.266192	-0.122621	-0.173871	-0.0948612	-0.198287	-0.0905928	-0.15223	-0.275746	-0.0730673	-0.174201	-0.150792	-0.160677
ANKRD45	0.362143	0.253976	0.435678	0.280461	0.657336	0.359712	0.300322	0.150619	0.359991	0.134799	0.290794	0.168106	0.350649	-0.014344	0.0582874	0.221715	0.0914221	0.161623	0.201286	0.0920689	0.0111342	0.31292	0.134425	0.48667	0.0941081	0.109151	0.00036972	0.128496
ANKRD46	-1.0188	-0.865163	-0.835391	-0.951175	-1.01171	-1.03112	-0.842851	-0.62996	-0.993989	-0.962347	-0.914452	-0.949715	-0.968108	-1.04291	-0.717319	-0.648678	-0.383415	-0.648933	-0.738465	-0.743821	-0.533533	-0.56726	-0.661355	-0.653597	-0.51166	-0.491736	-0.600554	-0.510132
ANKRD49	0.0706782	0.181237	0.0876381	0.215732	0.289594	-0.20071	0.108738	-0.181191	0.273124	0.0822394	0.279211	0.31336	0.0986867	0.426232	0.0399511	0.055891	0.0311096	0.321823	0.218492	0.306928	-0.0909833	0.453569	-0.21661	0.260797	0.0201014	0.210828	-0.109752	0.410611
ANKRD50	-0.0409463	-0.0354762	-0.163534	-0.109116	0.00959307	-0.195419	-0.0263063	-0.070735	-0.400614	0.0268854	0.0690477	-0.333633	-0.345829	-0.138391	-0.12802	0.00785102	0.0357518	-0.116509	-0.0784332	-0.0351024	-0.042332	-0.238597	-0.207862	-0.149272	-0.0665441	-0.224763	0.199855	-0.075906
ANKRD55	-0.161975	-0.186199	0.0612276	-0.350633	0.0389754	-0.186058	-0.144435	-0.122977	0.0795973	-0.0193419	-0.0405776	-0.0797963	0.0309732	-0.0316213	-0.032798	-0.101492	-0.145806	-0.00442651	-0.00896891	-0.0148382	-0.0527119	-0.143157	0.101916	0.29919	0.0631653	0.151919	0.0376599	-0.0501587
ANKRD6	0.117775	0.248455	0.256988	0.170023	0.186476	0.0903735	-0.0412023	0.12489	0.10566	0.0583008	0.167259	0.0791174	0.0855536	-0.0243294	0.0727189	-0.0383826	-0.105729	-0.082915	-0.148679	-0.191372	-0.0250489	-0.0909405	0.0315523	0.109429	0.0102106	-0.12903	0.108037	0.00869143
ANKRD7	0.37701	0.187746	0.452543	0.235774	0.339588	0.491347	0.109822	0.326249	0.334298	0.357411	0.505101	0.540548	0.239229	0.457456	0.2027	0.368023	0.128615	0.318649	0.244794	0.536011	0.328894	0.103888	0.249333	0.358517	0.254615	0.415517	-0.00370865	0.425251
ANKS1A	0.463823	0.329366	0.407949	0.314363	0.27116	0.447226	0.310186	0.480604	0.563543	0.56998	0.349878	0.44594	0.473567	0.394304	0.376203	0.470051	0.433182	0.313854	0.333073	0.328656	0.470324	0.315521	0.418649	0.50716	0.289759	0.271176	0.305361	0.272651
ANKS1B	0.29527	0.2809	0.301824	0.280452	0.31489	0.252368	0.310725	0.311298	0.281033	0.189177	0.270944	0.256446	0.320464	0.376878	0.292323	0.341181	0.360542	0.370258	0.281878	0.333812	0.357234	0.365706	0.383072	0.18445	0.099141	0.139606	0.163731	0.23222
ANKS3	-0.00431303	0.195344	0.188654	0.0980444	0.257026	0.358228	0.388014	0.201044	0.230463	0.146595	0.252734	0.351696	0.262942	0.055724	0.0663005	0.254385	0.0572401	0.199082	0.0196232	0.179925	-0.0635298	0.134895	-0.0103128	0.497161	0.118952	0.172735	0.0996983	0.162366
ANKS4B	0.0911108	-0.160741	0.114033	0.0665665	0.0376369	0.105313	0.0755192	0.0317834	-0.00382869	-0.109752	-0.0245578	-0.00724281	-0.0433438	-0.253886	-0.196116	-0.100281	-0.0399295	-0.335569	-0.179489	-0.0976392	-0.153119	-0.292718	-0.205461	-0.21493	-0.204349	-0.265542	-0.254573	-0.207473
ANKS6	-0.799669	-0.243853	-0.042847	-0.464542	-0.530575	-0.166236	0.0275981	0.00831897	-0.353002	-0.292156	0.00638148	-0.221595	-0.20138	-0.26225	-0.127484	-0.0845433	-0.167164	-0.403781	-0.187265	-0.420966	-0.0377561	-0.358389	-0.138163	0.140904	-0.0211358	-0.116438	-0.337954	-0.256264
ANKZF1	-1.29176	-1.14167	-0.934073	-0.938137	-1.38762	-1.53565	-1.41259	-1.1935	-1.09424	-0.828206	-1.13368	-1.10572	-0.744142	-1.06029	-1.00125	-0.946871	-0.615375	-0.749518	-0.672027	-0.957239	-0.758732	-0.720945	-0.892623	-0.743571	-0.805075	-0.716761	-0.859136	-0.577374
ANLN	-0.539117	-0.224121	-0.391224	-0.227553	-0.475923	-0.453172	-0.80413	-0.812355	-0.646698	-0.624566	-0.608376	-0.608803	-0.282365	-0.944537	-0.592862	-0.685817	-0.893054	-0.56126	-0.448169	-0.703342	-0.720963	-0.565392	-0.943036	-1.46366	-0.65758	-0.653466	-0.811605	-0.87294
ANO1	0.249661	0.193669	0.269149	0.29693	0.412007	0.296874	0.357492	0.359771	0.18287	0.311937	0.254346	0.114295	0.0846962	0.160147	0.302262	0.12667	0.129004	0.142949	0.134063	0.141311	0.21927	0.109014	0.188627	-0.0594866	0.127932	0.12013	0.198139	0.101512
ANO10	-0.088058	-0.0395955	-0.27175	0.0750135	-0.169464	0.0968049	0.0238968	0.00622156	-0.0712251	-0.0842872	-0.0612598	-0.0587771	0.0440332	-0.0639106	0.0742163	0.351658	0.128899	0.263869	0.0636502	0.109125	0.223353	0.014164	-0.0942428	0.247584	-0.163788	0.00584918	0.123993	0.0853066
ANO3	0.194533	0.0641927	0.178579	0.00266929	0.111504	0.0531639	0.107993	-0.130682	0.190108	0.0529981	0.139064	0.123111	0.0638331	-0.170707	0.172051	-0.00923404	-0.0646957	0.131292	0.0708056	-0.0191603	-0.0254069	-0.0473066	0.129974	-0.0490108	-0.0333492	-0.166442	-0.207199	-0.0124836
ANO4	0.00300667	-0.0583985	-0.0224853	0.0785198	0.0488965	0.0676217	0.182322	-0.128044	0.0782133	0.0683573	-0.0345053	0.0417452	0.110415	0.0938109	0.0925994	-0.183705	-0.117938	0.0340404	0.0409763	-0.189444	-0.0870931	0.0144064	-0.201193	0.0719372	-0.0205657	0.116866	0.0694729	-0.214985
ANO5	0.375853	0.220872	0.210375	0.0142931	0.133268	0.20907	-0.0834895	0.348138	0.438648	0.153105	0.351334	0.31096	0.145659	0.443908	0.454332	0.274827	0.47911	0.319186	0.321974	0.425117	0.412463	0.120607	0.412743	0.616921	0.303536	0.222273	0.330582	0.554005
ANO6	-0.808106	-0.515668	-0.627377	-0.612928	-0.935142	-0.777763	-0.518531	-0.600532	-0.694161	-0.545744	-0.744191	-0.497886	-0.602267	-0.615678	-0.5956	-0.694986	-0.616313	-0.32907	-0.69999	-0.762873	-0.535542	-0.473691	-0.588552	-0.542391	-0.473914	-0.309496	-0.457992	-0.437166
ANO7	0.362332	0.279476	0.359681	0.419128	0.261108	0.349216	0.29641	0.226413	0.422081	0.367729	0.359448	0.166844	0.330313	0.275929	0.107129	0.221984	0.204284	0.19899	0.291868	0.21505	0.298803	0.204476	0.352333	0.361468	0.239791	0.284286	0.285763	0.272076
ANO9	0.802996	0.407721	0.622435	0.459268	0.651173	0.563025	0.60646	0.559941	0.783883	0.389559	0.54889	0.642175	0.432928	0.163888	0.472797	0.458019	0.256974	0.245651	0.410495	0.457289	0.42313	0.599729	0.697953	0.819766	0.599999	0.626432	0.695904	0.850384
ANP32A	-0.0120647	-0.0510332	-0.131514	-0.0870991	-0.0277356	-0.0354088	-0.0823207	-0.105409	-0.162967	-0.0564563	-0.133993	-0.0314711	-0.150346	-0.204937	-0.0812119	-0.141318	-0.0607732	-0.0976182	-0.0822138	-0.0926578	0.0515952	-0.108094	-0.0632019	0.0203869	-0.0846291	-0.0235523	0.0333819	-0.142177
ANP32B	-0.0639493	-0.121414	-0.0411522	-0.032852	-0.0139027	0.0991172	-0.210604	-0.000466118	-0.10984	-0.196771	-0.0206706	-0.13504	-0.187778	-0.00696025	0.0412245	-0.0846756	-0.177254	0.00171989	0.0462651	-0.0919314	-0.187422	-0.024428	-0.0262027	0.0369536	0.0496192	-0.0367895	-0.142012	-0.0470941
ANP32E	-0.628424	-0.499219	-0.510532	-0.562743	-0.755137	-0.669877	-0.372117	-0.550893	-0.552526	-0.513699	-0.589263	-0.557718	-0.387119	-0.391363	-0.255498	-0.497988	-0.345025	-0.31048	-0.413071	-0.375556	-0.309469	-0.308147	-0.390276	-0.6515	-0.319491	-0.337206	-0.386696	-0.310754
ANPEP	0.340595	0.302355	0.456904	0.198133	0.594604	0.521242	0.421243	0.39954	0.220816	0.498142	0.666208	0.638715	0.542091	0.601181	0.676103	0.601928	0.652024	0.602831	0.585212	0.448652	0.486293	0.433913	0.630953	0.840864	0.414361	0.578199	0.372885	0.479192
ANTXR1	0.0276421	-0.156674	-0.0670949	0.00596958	-0.0458345	-0.0921046	0.177636	-0.0398643	0.0936264	0.193317	0.061745	0.00201949	-0.0198859	0.0323979	0.0808299	0.196984	0.115255	0.15227	0.0396148	0.207004	0.283544	0.133734	0.0409839	0.239734	0.221295	0.226458	0.154817	0.0618481
ANTXR2	-0.681615	-0.397218	-0.576819	-0.422188	-0.459781	-0.461828	-0.531499	-0.327443	-0.52619	-0.402985	-0.499983	-0.417163	-0.446999	-0.338095	-0.293238	-0.353354	-0.371819	-0.361959	-0.471195	-0.273718	-0.368894	-0.228586	-0.291083	-0.305445	-0.172925	-0.271583	-0.275617	-0.27851
ANTXRLP1	-1.60149	-1.36961	-1.4551	-1.29131	-1.88603	-1.81376	-1.20146	-1.57194	-1.40421	-1.29731	-1.24303	-1.48395	-1.2855	-1.43016	-1.54086	-1.34022	-1.09515	-1.3168	-1.49415	-1.37092	-1.21256	-1.33256	-1.29079	-1.42918	-1.27038	-1.35479	-1.56095	-1.32084
ANXA10	-0.38632	-0.220541	-0.182055	-0.0711526	0.0584457	-0.290842	-0.158948	-0.257422	-0.32641	-0.127537	0.215261	-0.0578172	-0.239265	-0.166187	-0.0892494	0.0653726	-0.0609693	-0.0414262	0.0485483	0.201673	-0.0160111	-0.0701028	-0.225055	-0.0478071	-0.246483	-0.117054	-0.139537	-0.23825
ANXA11	0.939198	1.05549	0.899964	1.31446	0.539149	0.748242	1.07027	1.05958	0.897516	1.16325	1.54528	0.987044	0.966491	0.806539	1.22865	1.1791	1.3566	1.114	1.03921	1.28562	1.22092	0.245303	1.01448	1.13864	0.886151	1.30313	1.07201	1.23031
ANXA13	0.331394	0.544025	0.409388	0.0896739	0.308613	0.439787	0.273954	0.105427	0.444615	0.346023	0.223889	0.291298	0.343591	0.291553	0.0656489	0.0412537	0.182002	0.398932	0.147966	0.311643	0.164625	0.147533	0.271309	0.156439	0.224818	0.228992	0.263459	0.138895
ANXA2	-1.60525	-1.23853	-1.24414	-1.18311	-1.49477	-1.52707	-1.03862	-1.17453	-1.20192	-1.12534	-0.974098	-1.15338	-0.948313	-1.16433	-1.04073	-1.29963	-0.894953	-1.162	-1.1615	-1.20608	-1.07768	-1.24033	-1.14141	-0.886825	-1.16472	-1.14218	-1.26157	-0.971133
ANXA2R	-0.0797783	-0.224389	-0.111158	-0.335449	-0.304775	-0.0169855	0.0297514	-0.155359	-0.130866	0.0266634	-0.191565	-0.203685	0.0364929	0.00370732	-0.0208345	-0.178687	0.0153936	-0.103648	-0.127251	-0.206931	-0.093088	0.0306655	-0.242538	0.0263287	-0.121979	0.350734	0.0402649	-0.137533
ANXA3	-0.678153	-0.150716	-0.0921595	-0.516896	-0.195527	-0.124071	0.00211066	-0.442076	-0.10854	-0.0742403	-0.286935	-0.303875	-0.311221	-0.129922	-0.0494934	-0.237543	-0.450974	-0.266253	-0.330554	-0.404086	-0.546016	-0.3036	-0.365827	0.0495807	-0.232555	-0.0874015	-0.119756	-0.00183984
ANXA5	-2.19321	-1.41917	-1.45328	-0.807169	-2.11117	-1.93594	-0.514447	-1.67585	-1.91507	-0.81048	-0.790375	-1.69776	-1.49352	-1.57083	-1.44553	-1.39438	-1.01974	-1.429	-0.891247	-1.40007	-1.27429	-1.71722	-1.28934	-1.55333	-1.57938	-0.996148	-1.22379	-0.564942
ANXA6	-0.385921	-0.429051	0.00458163	0.251628	-0.0600539	0.194657	-0.09933	0.0218578	-0.188213	0.318512	0.31126	0.139753	-0.0429248	0.296631	0.137391	-0.359146	0.36943	0.170109	-0.170171	0.195541	-0.165966	0.184365	0.170662	-0.0218162	-0.246307	0.0990096	0.193473	0.113092
ANXA7	-0.0585501	0.0639748	0.0695294	-0.043465	-0.052276	0.162866	0.0537401	0.200675	0.038586	0.0374419	-0.0281438	0.0872639	0.0491515	0.138521	0.109331	0.269188	0.293696	0.20436	0.0174099	0.0744175	0.136262	0.309578	0.16944	0.316592	0.181191	0.165432	0.121046	0.325639
ANXA9	0.201896	-0.0151553	0.110393	0.0728232	-0.043659	-0.00518594	-0.00270418	-0.0857026	0.312275	0.416526	0.287358	0.168746	0.316518	0.223584	0.518634	0.236509	0.213088	0.162299	0.228665	0.231914	0.0353955	0.247467	0.31285	-0.0144818	0.117833	0.236008	0.186636	0.334728
AOAH	-0.262333	-0.159366	0.0749771	-0.252594	-0.11233	0.0593896	-0.0174254	0.0582676	-0.100034	-0.234594	-0.150338	-0.0666677	0.0377507	-0.0699229	0.0176531	-0.0482588	-0.168491	-0.0117455	-0.18857	-0.0334859	-0.0670456	-0.0726209	-0.182374	-0.0513925	-0.12264	-0.0649209	-0.136279	-0.199493
AOC1	0.566909	0.949401	0.627501	0.366406	0.713411	0.649662	0.420093	0.521068	0.834359	0.812717	0.607885	0.720847	0.658674	0.901622	0.429219	0.370898	0.511938	0.504337	0.54308	0.265617	0.825967	0.370357	0.499009	0.453534	0.18008	0.388534	0.370041	0.272347
AOC2	0.168346	-0.0187629	0.303978	0.092184	-0.0712401	0.123134	0.156086	-0.139278	0.0123636	-0.0773054	0.257771	0.274925	0.0715775	0.210914	-0.0415254	-0.0545953	0.0223996	0.0363511	0.166617	0.197243	-0.00169716	-0.00746792	0.0496495	0.0453644	0.0122653	-0.173616	-0.198371	0.0119293
AOX3P-AOX2P	0.0956651	0.108734	0.0818654	0.315451	0.266457	0.0190853	0.146565	0.233098	-0.0452807	0.0653404	0.0918542	-0.0783043	0.134777	0.0274005	-0.00797045	0.189723	0.0272491	-0.0291867	-0.0318391	0.0853589	0.0850397	-0.0998097	0.0586487	0.254031	0.0033435	0.148506	-0.0345062	-0.073453
AP1AR	0.235448	0.212752	0.278017	0.185838	0.321442	0.326131	0.302291	0.30494	0.230572	0.157445	0.226091	0.0950045	-0.00618951	-0.0238067	0.0138904	-0.131284	-0.00251192	0.0362658	-0.0199361	-0.00610765	0.132844	-0.114092	0.0924251	-0.0840211	0.00876119	0.000737016	-0.0752528	-0.124232
AP1G1	-0.364328	-0.575076	-0.504647	-0.563076	-0.536185	-0.479758	-0.513007	-0.352408	-0.808767	-0.546703	-0.39212	-0.557834	-0.563804	-0.590374	-0.450402	-0.121197	-0.47916	-0.293222	-0.0760863	-0.381618	-0.318154	-0.411501	-0.468175	-0.505227	-0.26611	-0.125847	-0.3288	-0.685498
AP1M1	0.0938207	-0.162	0.113573	0.0539653	0.0114648	0.17585	0.230294	-0.069501	0.0551337	0.162052	-0.00940553	0.0189631	0.226818	0.0647154	0.0388843	0.0712184	0.220993	0.188989	0.184888	0.172429	0.15388	0.190383	0.0370744	0.0203696	0.0556549	0.27515	-0.130682	0.0809867
AP1M2	0.566209	0.637033	0.540064	0.514161	0.641831	0.859642	0.519217	0.511102	0.681233	0.72721	0.55989	0.70333	0.57658	0.695237	0.577919	0.416899	0.519062	0.40437	0.516319	0.334709	0.228988	0.226431	0.292119	0.525516	0.381088	0.27583	0.134163	0.16623
AP1S1	0.211578	0.387284	0.306286	0.33956	0.471502	0.345803	0.216339	0.38815	0.255782	0.300142	0.199755	0.335439	0.328982	0.345141	0.0927889	0.302511	0.278627	0.257321	0.386193	0.300482	0.305606	0.257372	0.194656	0.0780043	0.277335	0.0758088	0.0753149	0.167722
AP1S2	0.178509	0.403736	0.360472	0.357774	0.286821	0.337009	0.482946	0.195114	0.330166	0.467183	0.336115	0.411922	0.418448	0.329687	0.371523	0.241651	0.304001	0.324001	0.388181	0.306395	0.313429	0.279404	0.00144817	0.64615	0.216875	0.349858	0.412294	0.320361
AP2B1	0.881076	0.876418	0.963274	0.321349	0.754872	0.79825	0.837286	0.499318	0.329859	0.409065	0.65421	0.800219	0.861697	0.463465	0.836918	0.33984	0.386422	0.795806	0.545233	0.389832	0.607447	0.425305	0.468422	0.211756	0.312958	0.457905	0.454335	0.395652
AP3B1	-0.812469	-0.939391	-0.871007	-0.926905	-0.881188	-0.832575	-0.651644	-0.692907	-1.04866	-0.590264	-0.460788	-0.634213	-0.698324	-0.550205	-0.664476	-0.625163	-0.529167	-0.587786	-0.599826	-0.770554	-0.765415	-0.547332	-0.539275	-0.480337	-0.813389	-0.808594	-0.663385	-0.495006
AP3B2	0.193537	0.105798	0.151662	0.19433	0.192818	0.15551	0.216172	0.197695	0.347441	-0.0209136	0.173986	0.179266	0.144075	-0.0257414	-0.0106212	0.321431	0.253355	0.200577	0.196117	0.108515	0.236729	0.240804	0.239772	0.364422	0.110874	0.273131	0.153352	0.03029
AP3D1	-0.58018	-0.592395	-0.633219	-0.315978	-0.911963	-0.576077	-0.360303	-0.385163	-0.413476	-0.262578	-0.29409	-0.47145	-0.184019	-0.482257	-0.153142	-0.168594	-0.0501923	-0.11092	0.0409295	-0.236061	-0.127666	-0.149954	0.00246008	-0.310445	-0.163188	-0.123417	-0.0975353	-0.131926
AP3M1	-0.756727	-0.927469	-0.711479	-0.425785	-0.837379	-0.810228	-0.547043	-0.943124	-0.77822	-0.818763	-0.528502	-0.770399	-0.646207	-0.612458	-0.641758	-0.656473	-0.587046	-0.540727	-0.567324	-0.482775	-0.50098	-0.503664	-0.654521	-0.617095	-0.500098	-0.555786	-0.49747	-0.45055
AP3M2	-0.918212	-0.870397	-0.558755	-0.832699	-0.756965	-0.696208	-0.861843	-0.588432	-0.80772	-0.712429	-0.554914	-0.511509	-0.571231	-0.669402	-0.603815	-0.375715	-0.305322	-0.255348	-0.512863	-0.368392	-0.306493	-0.300429	-0.475837	-0.355517	-0.296412	-0.0545238	-0.43055	-0.433177
AP3S1	-0.79691	-0.50202	-1.0419	-0.306715	-0.893251	-0.931337	-0.514274	-0.580235	-0.886708	-0.622501	-0.682469	-0.559788	-0.450411	-0.762406	-0.174805	-0.463821	-0.501726	-0.309697	-0.295861	-0.357722	-0.688863	-0.633645	-0.253429	-0.222192	-0.467184	-0.284374	-0.578029	-0.192351
AP3S2	-0.680506	-0.406421	-0.484867	-0.718149	-0.587493	-0.959678	-0.773721	-1.02239	-1.03183	-0.627925	-0.74135	-0.559603	-0.875653	-1.24028	-0.61186	-0.512861	-0.688183	-0.635112	-0.791451	-0.870588	-0.829518	-0.904279	-0.982487	-0.915161	-1.07857	-0.937515	-1.13665	-1.04068
AP4E1	-0.12408	-0.298957	-0.337255	-0.180601	-0.343247	-0.171451	-0.251307	-0.295933	-0.282605	-0.274126	-0.267152	-0.280883	-0.311981	-0.271886	-0.232568	-0.151054	-0.128262	-0.20563	-0.142221	-0.156742	-0.189231	-0.204344	-0.117915	-0.120019	-0.196395	-0.270131	-0.239687	-0.136524
AP4S1	-0.0881887	-0.220153	-0.0414436	0.0791222	0.230729	0.217191	0.0895802	-0.333909	-0.0880497	-0.0088192	-0.0458516	-0.168001	0.116974	0.0899633	-0.469656	-0.28942	0.125862	0.297782	0.0311005	0.021341	0.244469	-0.191785	0.255916	0.119119	0.054194	-0.187381	0.272536	-0.016409
AP5B1	0.269924	0.201107	0.0458045	0.171677	-0.0608683	0.327752	0.315674	0.222484	0.400742	0.375034	0.505504	0.217426	0.229746	0.544612	0.445603	0.485201	0.542897	0.406347	0.603112	0.590477	0.564933	0.413202	0.804359	0.770594	0.139195	0.449486	0.485362	0.390616
AP5M1	-0.0758196	-0.00340943	-0.172847	-0.135595	-0.0575307	-0.234268	-0.12467	-0.135416	-0.139623	-0.242459	-0.163371	-0.127069	-0.180999	-0.147004	-0.0168228	0.0965657	-0.128292	-0.0716871	-0.0909997	0.0200244	-0.208582	-0.100721	-0.167551	-0.144984	-0.171128	-0.154916	-0.0579871	-0.251617
AP5S1	-0.728074	-0.264482	-0.561267	-0.336403	-0.511181	-0.609581	-0.561665	-0.349788	-0.389492	-0.372373	-0.336939	-0.285885	-0.484413	-0.270359	-0.537672	-0.628513	-0.60527	-0.713712	-0.73087	-0.690153	-0.900752	-0.662895	-0.956879	-0.984765	-0.842864	-0.973889	-0.84938	-0.917787
AP5Z1	0.0863776	0.11957	0.28538	0.205611	0.309614	0.125421	0.16874	0.110109	0.112712	0.189536	0.154061	0.000617859	0.111094	0.10753	-0.0772364	-0.0348656	-0.0145762	0.197905	-0.0194708	0.0650416	-0.105735	-0.0452278	-0.0100096	0.159035	0.00155054	0.110784	-0.0243302	0.243774
APAF1	0.409917	0.096132	0.351059	0.098768	0.330651	0.0521962	0.231374	-0.0899902	0.247374	-0.373285	-0.0121064	-0.323011	-0.113969	-0.0926089	-0.0360093	0.0605534	0.30577	0.362291	0.142515	-0.404632	0.176202	-0.266722	-0.0887621	0.0960115	0.133912	-0.0414763	0.250481	0.138296
APBA1	-0.828	-0.666999	-0.555415	-0.436819	-0.47038	-0.694108	-0.609618	-0.361584	-0.590656	-0.464939	-0.583537	-0.572253	-0.518806	-0.511206	-0.469738	-0.746855	-0.507211	-0.408288	-0.848147	-0.940832	-0.756029	-0.545426	-0.601346	-0.421422	-0.638758	-0.382165	-0.387498	-0.462883
APBA2	0.0127967	0.0192416	-0.0217264	-0.0499166	0.128069	-0.00805512	-0.186849	0.0379121	-0.165074	-0.0524193	-0.0989693	-0.189089	-0.0772734	-0.00594929	-0.0075941	8.3675e-05	-0.0832241	-0.0145035	-0.0431557	0.0618	0.0327922	0.00890539	0.0524246	-0.0356206	0.0217581	-0.0345684	-0.110957	-0.059009
APBA3	0.188331	-0.00616462	-0.10528	-0.118573	0.0967965	-0.075064	-0.174839	-0.155529	-0.0578361	-0.129904	-0.246006	-0.172733	0.0157864	-0.083521	0.130135	-0.11387	0.03339	-0.162552	0.0592012	0.0164056	0.129099	0.0486085	0.106615	0.287838	0.0926212	0.172126	0.283155	-0.137179
APBB1	0.17545	0.346597	0.405959	0.401926	0.334292	0.219605	0.479709	0.234817	0.44581	0.325052	0.563419	0.633162	0.594332	0.313021	0.815603	0.729057	0.694786	0.653812	0.597875	0.681982	0.62063	0.275129	0.523528	0.469951	0.449276	0.600999	0.541884	0.419316
APBB1IP	-1.1847	-1.09411	-1.05264	-0.702717	-0.883394	-0.83559	-1.03899	-1.05864	-0.87952	-1.11186	-1.04426	-0.648587	-0.787241	-0.576824	-0.329132	-0.852004	-0.71611	-0.558703	-1.0452	-0.794959	-1.39014	-0.941856	-0.843975	-0.56918	-0.548265	-0.675258	-0.680424	-0.805625
APC	-0.353678	-0.315613	-0.324321	-0.258575	-0.19336	-0.380527	-0.366811	-0.107881	-0.435138	-0.346105	-0.436017	-0.346933	-0.437764	-0.353561	-0.1378	-0.312235	-0.448962	-0.182224	-0.253749	-0.197994	-0.508674	-0.490108	-0.526157	-0.483451	-0.360253	-0.434569	-0.414433	-0.441814
APC2	0.155193	0.108349	0.26573	0.313536	0.43023	0.523819	0.142716	0.197926	-0.0195313	0.182641	-0.108767	-0.0379737	0.17807	0.33021	0.219346	0.296163	0.0292857	0.12949	0.286317	0.272033	0.134818	0.296953	0.335564	0.196272	0.172567	-0.0119821	-0.0171881	0.0446286
APCDD1	0.605344	0.669801	0.658389	0.589353	0.982326	0.743899	0.391956	0.55476	0.950705	0.58072	0.807838	0.595315	0.708374	0.476222	0.561527	0.389977	0.728048	0.384347	0.387505	0.611273	0.57296	0.555695	0.897345	1.16302	0.547351	0.639278	0.767832	1.05931
APCS	0.077046	0.103972	0.237572	0.247943	0.427796	0.156566	0.00326948	0.164887	0.0693652	0.384187	0.315812	0.363705	0.0948785	0.0792624	0.228137	0.0485297	0.131583	-0.0016628	-0.076817	0.0412529	0.11688	0.00354103	0.237193	0.309461	0.0289281	0.159783	0.364664	0.269883
APEH	0.0467864	0.133155	0.146505	0.270922	0.192144	-0.0111284	0.12086	0.200954	0.00921358	-0.0133301	0.0170592	-0.0618611	-0.0533762	0.00827175	-0.0252868	0.0662909	-0.101747	-0.125188	-0.12382	0.169469	0.136164	-0.0867981	0.0962015	0.180643	-0.0135354	-0.0192543	0.0170781	0.0126242
APELA	-0.596904	-0.483727	-0.616194	-0.564156	-0.678074	-0.823489	-0.636377	-0.46346	-0.552349	-0.588987	-0.479986	-0.409823	-0.549697	-0.354774	-0.390854	-0.520451	-0.686056	-0.399015	-0.411063	-0.477679	-0.610257	-0.422055	-0.691677	-0.842741	-0.596482	-0.718701	-1.04118	-0.669107
APEX1	-2.39741	-1.55705	-1.62483	-1.70871	-1.88469	-1.73884	-0.963629	-1.50811	-1.54086	-1.23635	-1.72226	-1.80009	-1.16098	-1.58638	-1.11358	-1.55455	-1.32898	-1.53849	-1.73865	-1.76929	-1.15616	-1.40914	-1.81616	-1.37424	-1.32717	-1.06386	-1.30895	-1.46612
APEX2	0.0130811	0.185496	-0.0356414	-0.122697	0.115621	-0.148362	-0.270278	-0.350452	-0.0751337	-0.462941	-0.465034	-0.361445	-0.498433	0.150674	-0.306236	-0.499181	-0.370558	-0.26188	-0.404895	-0.184104	-0.176735	0.0245353	-0.524973	-0.454021	-0.199796	-0.236111	-0.18244	-0.391618
APH1A	0.0466341	-0.146552	0.0666083	-0.221859	0.102927	0.278384	-0.271204	0.238455	-0.0198175	0.0391157	0.052709	0.214853	0.138226	0.322881	0.329804	0.316422	0.359084	0.354301	0.301665	0.340904	0.253899	0.358957	0.413112	0.552021	0.247221	0.273135	0.0234604	0.527401
APH1B	0.194115	0.310118	0.295256	0.260353	0.38553	0.23455	0.314073	0.329703	0.0513259	0.0955784	0.0781789	0.0928086	0.196702	-0.146761	0.0614938	0.0201933	0.324835	0.239623	0.144817	0.0567667	0.00994905	0.145204	0.128826	0.289759	0.121899	0.331689	0.203531	0.489797
API5	0.193872	0.184341	0.280353	0.228799	0.333752	0.375178	0.147762	0.0150942	0.147005	-0.129221	-0.0280354	0.271731	0.096774	-0.0564277	-0.113732	0.0230544	0.0356855	-0.0738746	0.0564065	0.22295	0.229843	-0.121694	-0.190504	-0.323946	0.02954	-0.0467237	0.0887236	-0.0762875
APIP	0.0301379	-0.0690885	0.1334	0.0855722	-0.0202916	-0.169902	-0.127977	-0.047779	-0.236336	-0.12148	-0.154562	-0.137203	-0.114295	-0.369865	-0.0531595	-0.0987302	-0.324383	-0.182517	0.0158372	-0.117482	-0.159804	-0.297552	-0.176894	-0.171926	-0.00108426	-0.157466	-0.258699	-0.00809895
APITD1	-1.18005	-0.68177	-0.670792	-0.65939	-0.801381	-0.965569	-0.857691	-0.683496	-0.750981	-0.744989	-0.875763	-0.689234	-0.615332	-0.709386	-0.565869	-0.737226	-0.4538	-0.459503	-0.458022	-0.440736	-0.774175	-0.655442	-0.95281	-0.733284	-0.508532	-0.914498	-0.711443	-0.548332
APLF	0.0616199	0.0755153	0.120964	-0.00697971	0.144232	0.16258	0.128878	0.166787	0.108255	0.0939435	0.0752074	0.136434	0.0996272	0.149301	0.124367	0.0704624	0.0181294	0.108141	0.119673	0.10023	0.198081	0.121043	0.0690277	0.00163939	0.0565801	0.0881666	-0.0519079	0.0430422
APLN	0.461077	0.648918	0.567671	0.344455	0.292927	0.502736	0.396318	0.455288	0.401607	0.240322	0.37547	0.449329	0.574733	0.394016	0.269128	0.312036	0.209731	0.19241	0.408154	0.433553	0.358872	0.132598	0.485618	0.304639	0.315047	0.391149	0.524484	0.171593
APLP1	0.42265	0.387057	0.353034	0.321134	0.398626	0.389249	0.499867	0.402673	0.405476	0.378793	0.483682	0.476375	0.445566	0.569828	0.375299	0.536148	0.553811	0.588041	0.415722	0.516511	0.430404	0.421779	0.575895	0.610368	0.507898	0.491246	0.328763	0.400534
APLP2	0.428727	0.34676	0.234565	0.339666	0.200645	0.368402	0.41793	0.362051	0.502222	0.427285	0.401228	0.435388	0.437112	0.533232	0.454242	0.335973	0.730663	0.629895	0.381316	0.596396	0.518245	0.689434	0.56856	0.60957	0.378499	0.467577	0.610744	0.552971
APOA1	-0.271834	-0.518819	-0.478301	-0.699812	-0.403146	-0.261509	-0.536163	-0.348413	-0.466875	-0.193688	-0.773012	-0.441023	-0.646985	-0.309507	-0.370512	-0.302441	-0.328392	-0.306131	-0.438505	-0.468707	-0.139037	-0.290373	-0.0169841	-0.129724	0.111398	-0.306558	0.0211262	-0.200514
APOA2	-3.72483	-3.94751	-3.90502	-4.40316	-3.94214	-3.60264	-4.29988	-3.77856	-3.57712	-3.99108	-3.93909	-3.44687	-3.3823	-4.00285	-3.64309	-3.61879	-4.12091	-3.25221	-3.40689	-4.30135	-3.91977	-3.90932	-4.17511	-4.68474	-3.40601	-4.05035	-4.97255	-4.13549
APOB	-0.864947	-0.426281	-0.576686	-0.976265	-0.560687	-0.576307	-0.713672	-0.699029	-0.840492	-0.692385	-0.748915	-0.381914	-0.612247	-0.599473	-0.389719	-0.447894	-0.36179	-0.354467	-0.419681	-0.392092	-0.307815	-0.322874	-0.566991	-0.493305	-0.163673	-0.389265	-0.407605	-0.403222
APOBEC1	0.344928	0.0318776	0.0167241	0.150192	0.151528	0.0898582	0.0496372	0.0062227	-0.138526	-0.0150442	0.106375	0.031316	-0.0103123	-0.0072016	0.0322113	-0.061181	-0.0714661	0.0450882	-0.140405	0.00366435	-0.165418	-0.0132209	-0.0726924	-0.203047	-0.0535972	0.0504223	0.0086741	0.192711
APOBEC3C	-0.467715	-0.438611	-0.424418	-0.529537	-0.715863	-0.653475	-0.566313	-0.464026	-0.233458	-0.326013	-0.525219	-0.306643	-0.326583	-0.306479	-0.386279	-0.336334	-0.146003	-0.386093	-0.416193	-0.590017	-0.565197	-0.33497	-0.540651	-0.529918	-0.438123	-0.302996	-0.672594	-0.65901
APOBEC3D	-0.36768	-0.0741172	-0.485518	-0.0853233	-0.29846	-0.579429	-0.480927	-0.268686	-0.158423	-0.392787	-0.124478	-0.383182	-0.510342	-0.543132	-0.45741	0.0422669	-0.606755	-0.302769	-0.496201	-0.579595	-0.66853	-0.189184	-0.294719	-0.438586	-0.468447	-0.130944	-0.171554	-0.178683
APOBEC3F	0.473467	0.29812	0.431812	0.505284	0.5059	0.397758	0.407087	0.411168	0.444899	0.246537	0.357955	0.331931	0.373328	0.263135	0.367214	0.243272	0.263995	0.0955531	0.00887824	0.244335	0.300245	0.221606	0.286286	0.6724	0.0812628	0.136105	0.234851	0.323432
APOBEC3H	-0.882304	-0.66872	-0.700855	-0.703012	-1.0177	-0.99368	-0.869374	-0.955864	-0.906958	-0.634983	-0.982284	-0.769633	-0.82032	-0.756183	-0.864524	-1.11707	-0.96653	-0.555235	-1.12687	-1.65984	-0.993672	-0.8388	-1.09364	-1.26327	-1.02245	-1.05143	-1.20291	-0.820149
APOBEC4	0.0996802	-0.0660876	0.0957533	0.00934622	0.155003	0.119794	-0.090997	0.030031	-0.134194	0.122691	-0.0801984	0.0112101	0.0524832	0.182617	-0.127707	0.129639	0.02473	-0.0900775	-0.252697	-0.233648	0.212507	0.0929212	0.042966	0.0742877	0.112981	-0.000362098	-0.0754272	-0.00950109
APOC1	-1.32687	-1.29936	-1.31688	-1.67814	-1.46111	-1.51581	-1.39196	-1.40478	-1.44492	-1.32145	-1.39924	-1.35922	-1.32261	-1.39036	-1.02982	-1.15728	-1.51528	-1.24459	-1.30338	-1.48864	-1.1049	-1.02371	-1.08694	-1.21998	-1.1761	-1.15247	-1.88629	-0.952753
APOC2	-0.172138	-0.484879	-0.499731	-0.387888	-0.535207	-0.824495	-0.368442	-0.736726	-0.893422	-0.56392	-0.661297	-0.779616	-0.546869	-1.02743	-0.599979	-0.653254	-0.556418	-0.627319	-0.490983	-0.824974	-0.732524	-0.870498	-0.620325	-0.740005	-0.484562	-0.754129	-0.777394	-0.501554
APOD	2.93364	3.12079	2.55214	1.63316	4.17973	2.95227	4.19359	2.03684	2.84305	1.7796	1.45289	2.90168	2.43214	2.57832	2.61094	2.33082	2.43299	2.24541	2.11563	3.87644	3.35947	2.28581	2.49841	4.40249	3.29336	2.69253	1.67474	1.33967
APOE	0.108144	0.0043122	-0.131081	-0.0294314	0.0465717	-0.150064	-0.130669	-0.154101	-0.00943353	-0.188388	-0.106813	0.3639	0.122268	-0.034003	0.165465	-0.139402	-0.0441251	-0.00879393	-0.0357993	0.0366926	-0.0849305	-0.232905	-0.0612473	-0.180811	0.103441	0.0171961	0.053783	0.0631587
APOH	-3.38945	-2.68486	-3.4484	-3.14362	-3.21949	-3.40173	-3.81784	-3.51447	-3.06806	-3.18208	-3.16277	-2.73635	-2.406	-3.02966	-3.45323	-3.19818	-3.27278	-2.66246	-2.38385	-3.064	-3.59849	-2.85582	-4.06042	-4.4934	-2.97827	-3.32208	-3.94693	-3.66605
APOL3	0.227482	0.291069	0.657562	0.451355	0.301116	0.461351	0.512662	0.467513	0.51773	0.779522	0.366467	0.671704	0.481177	0.566045	0.696716	0.414643	0.402944	0.315	0.272887	0.58786	0.611935	0.523617	0.404471	0.5171	0.424271	0.314873	0.36762	0.452936
APOL4	-1.90355	-1.83471	-1.62854	-1.96718	-1.17257	-1.43018	-1.81509	-2.07611	-1.71778	-1.81876	-1.89852	-1.99927	-1.94945	-2.03002	-2.57575	-1.94776	-2.26739	-1.90605	-2.25557	-1.71756	-1.89224	-1.95665	-2.34984	-2.07583	-1.71906	-1.56345	-2.07009	-1.21206
APOL5	0.251359	0.0888743	0.178173	0.186115	0.0583185	0.0885754	0.239218	0.000851332	0.27611	0.197162	0.135101	0.141411	0.058676	0.0852444	-0.215538	0.0381412	-0.0403629	0.336469	-0.173856	-0.226191	0.0748982	0.12592	0.0325385	0.106813	0.0283503	0.0971727	0.0672343	0.104528
APOL6	-0.0204222	-0.134199	-0.137993	-0.36127	-0.205378	-0.0169911	-0.128293	-0.19999	-0.184308	-0.172684	-0.162417	-0.0434451	-0.150961	-0.128732	-0.130596	-0.168682	-0.257762	-0.123895	-0.39486	-0.0166065	-0.198303	-0.342245	-0.302977	0.0255272	-0.185493	0.0890805	-0.17299	-0.262074
APOLD1	0.00747177	0.750334	0.179317	0.25665	0.471099	-0.20062	0.939358	-0.139027	0.699357	-0.130265	-0.201059	-0.281671	0.116979	0.831699	0.509877	0.144848	-0.144246	0.129264	0.648366	-0.201194	0.261666	0.364768	0.674917	0.475507	0.233153	-0.0071177	0.0880984	0.931685
APOM	-0.362881	-0.636935	-0.379815	-0.596826	-0.580904	-0.267729	-0.431827	-0.414969	-0.329358	-0.373532	-0.622417	-0.54302	-0.232513	-0.574676	-0.294198	-0.619006	-0.373985	-0.376627	-0.355064	-0.370039	-0.46185	-0.40671	-0.446569	-0.685053	-0.530258	-0.346362	-0.304065	-0.219396
APOO	0.44901	0.40157	0.429952	0.421376	0.535205	0.488394	0.227546	0.464247	0.426303	0.379062	0.420681	0.369263	0.424972	0.240457	0.328429	0.411949	0.233911	0.315563	0.359911	0.347544	0.402231	0.298006	0.624469	0.857471	0.117642	0.651018	0.17254	0.284474
APOOL	-0.449451	-0.349698	-0.382142	-0.343967	-0.391994	-0.245813	-0.316442	-0.186671	-0.343979	-0.191107	-0.332717	-0.240175	-0.349075	-0.234786	-0.161976	-0.326135	-0.334737	-0.377331	-0.369065	-0.382402	-0.349989	-0.200043	-0.292142	-0.212895	-0.299572	-0.40083	-0.157621	-0.225772
APOPT1	-0.000406291	0.19906	0.227092	0.254637	0.709222	0.36895	0.250668	0.246609	0.507666	0.200062	0.361699	0.547205	0.194661	0.406766	-0.00862249	0.297193	0.344972	0.331243	0.193825	0.122429	0.474654	0.58361	0.45297	0.54267	0.362498	0.154352	0.652301	0.364021
APP	-0.0742567	0.0257911	0.0220997	0.115342	0.0266775	0.115922	-0.00934052	0.188479	0.233522	-0.0104621	0.129221	-0.0316085	0.111067	0.24846	0.208473	0.217754	0.34386	0.262936	0.288722	0.326101	0.262224	0.250745	0.193151	0.31099	0.270078	0.277347	0.249823	0.0888308
APPBP2	0.0260438	0.0593261	0.0307035	0.157545	0.121569	0.192156	0.0464096	-0.0585089	-0.00762356	0.0111952	-0.0222491	0.130834	0.0868169	-0.110715	-0.0357089	-0.111118	-0.0835916	0.0275703	-0.16199	-0.0827771	-0.0959129	-0.119817	-0.211192	-0.275512	-0.059681	-0.0979797	-0.340335	-0.246962
APPL1	0.0760054	0.242435	0.0911708	0.234375	0.228339	0.165393	-0.0698076	-0.0124004	0.107315	0.086545	0.0265846	-0.0289596	0.0949002	-0.160453	-0.104978	-0.0929829	0.109794	-0.00924561	-0.131243	-0.165009	0.0986754	0.151631	0.00379903	-0.0365394	0.0583555	0.00962006	0.199007	0.0463735
APPL2	-0.731881	-0.420305	-0.435028	-0.806211	-0.434021	-0.903068	-0.413565	-0.670379	-0.694602	-0.549518	-0.767185	-0.550923	-0.696924	-0.592324	-0.30621	-0.632076	-0.683526	-0.449853	-0.462825	-0.623167	-0.360631	-0.529935	-0.496709	-0.359543	-0.398736	-0.528943	-0.446143	-0.479834
APRT	-0.433265	-0.585843	-0.298193	-0.274883	-0.271313	-0.294719	-0.180847	-0.361822	-0.295338	-0.215252	-0.45323	-0.261272	-0.434768	-0.368012	-0.212685	-0.365829	-0.446256	-0.400397	-0.285553	-0.301152	-0.211662	-0.223523	-0.216861	-0.16182	-0.276693	-0.246592	-0.197947	-0.311476
APTX	-0.362574	-0.205374	-0.5359	-0.279728	-0.499393	-0.394179	-0.208456	-0.287869	-0.305449	-0.280012	-0.209574	-0.230583	-0.288751	-0.376602	-0.235078	-0.269419	-0.0171344	-0.368047	-0.107253	0.0144455	-0.393153	-0.119851	-0.348779	-0.512602	-0.166211	0.0110707	-0.0741703	-0.0815879
AQP1	0.479637	0.393037	0.856928	0.967439	0.846117	0.876585	0.917216	1.03575	1.08016	0.349001	0.529588	0.326254	0.436186	0.737478	0.875915	0.7237	0.777264	0.149498	0.572348	0.852974	0.726818	0.863838	0.381638	1.21558	0.670706	0.574345	0.168124	0.691515
AQP11	-0.054584	-0.103838	-0.195336	-0.169222	-0.0806521	-0.107609	-0.152149	-0.151846	-0.286703	0.0509091	0.0458003	-0.148616	-0.146669	-0.0965354	0.0960101	-0.0654324	-0.00506063	-0.0600447	0.0618598	0.00243967	-0.0796378	-0.0636665	0.0318682	0.0351182	-0.0698413	-0.131971	0.150838	-0.0278069
AQP2	-0.074588	0.0949022	0.0276656	-0.0116137	0.204352	0.176069	0.226181	0.116091	0.0520642	0.165429	0.235033	0.0739652	0.0799749	-0.161176	-0.34277	0.221278	-0.144088	0.0522468	-0.0665885	0.00436822	-0.10731	0.197354	0.0828338	0.253139	-9.08e-05	-0.0191885	0.0945786	0.382838
AQP3	-0.68761	-0.166323	-0.382228	-0.403265	-0.607441	-0.470238	-0.383688	-0.233546	-0.410026	-0.194073	-0.406077	-0.258457	-0.262335	-0.0822889	-0.308078	-0.429962	-0.195942	-0.293051	-0.305418	-0.331966	-0.285326	-0.139141	-0.479923	-0.290758	-0.399311	-0.608519	-0.588322	-0.411814
AQP4	-0.0420465	0.042123	-0.0391194	0.160664	-0.0178187	0.292081	0.132484	0.0389677	0.175911	0.107999	0.0052693	-0.00403155	0.222134	0.540005	0.0593181	0.144616	0.0944586	0.290811	0.372412	0.121022	0.404039	0.351967	0.220101	0.250258	0.0801589	0.427416	0.225055	0.0579244
AQP5	0.0221862	-0.0800692	0.152266	0.226798	0.289822	0.174439	0.0602728	0.188213	0.637356	0.0377605	0.16106	0.00430191	0.180203	0.0891806	0.045044	0.0754546	0.000274507	-0.091764	0.26265	0.0349071	0.0275219	0.256441	0.129501	0.374802	0.0365933	0.103217	-0.0589011	0.239891
AQP7	0.803922	0.455419	0.491096	0.566818	0.88195	0.886116	0.599296	0.867327	1.07558	0.593918	0.663822	0.957072	0.717593	0.923201	0.904635	0.641332	1.03735	0.861717	0.886566	0.88989	0.832981	0.7711	1.01403	1.00281	0.895684	0.72241	0.726387	0.683287
AQP9	-0.493028	-0.215157	-0.262322	-0.17275	-0.0414074	-0.208592	-0.128102	-0.229991	-0.181509	-0.0440648	-0.421447	-0.340684	-0.0577042	-0.354849	-0.251818	-0.302722	-0.384332	-0.00970859	-0.00355402	-0.0130484	-0.276622	-0.498951	-0.227715	0.408929	-0.346676	-0.384722	-0.312785	-0.155255
AQR	-1.02401	-0.823159	-0.665962	-0.907464	-0.732487	-0.709706	-0.678694	-0.755549	-0.774305	-0.673533	-0.794345	-0.820247	-0.71842	-0.788702	-0.578124	-0.622244	-0.830016	-0.807333	-0.631596	-0.845976	-0.627763	-0.67525	-0.837053	-0.796907	-0.710609	-0.698079	-0.587855	-0.74013
AR	0.67844	0.462941	0.473951	0.381794	0.335044	0.187043	0.0924226	0.414834	0.289604	0.209592	0.663216	0.25675	0.315581	0.396179	0.5726	0.769299	0.925259	0.901211	0.890813	0.87675	1.15294	0.481733	0.808714	0.859357	0.585955	0.406195	0.51693	0.627762
ARAF	0.762168	0.211304	0.185408	0.23841	0.326438	0.519219	0.834832	0.36639	0.402619	0.621906	0.682774	0.688531	0.499809	0.513024	0.496729	0.633983	0.560415	0.745616	0.285574	0.57308	0.566131	0.522318	0.427644	0.438213	0.477774	0.283594	0.445758	0.334192
ARAP1	-0.326032	0.132505	-0.439556	0.0706541	-0.0012588	-0.00257422	0.0301536	-0.0371406	0.0981503	0.0589036	0.248121	-0.105927	-0.0838319	0.0125389	0.1417	0.14562	-0.0527514	0.150704	0.211863	0.156821	0.109452	0.0162545	0.39744	0.114972	0.00334117	0.0675117	0.0791933	0.310586
ARAP2	0.281424	0.192276	0.219298	0.214872	-0.046052	0.270051	0.150591	0.0089783	0.562047	0.169374	0.168026	0.069573	0.419751	0.218551	0.096553	-0.0445907	0.123566	0.293483	0.217459	0.155477	0.17563	0.18982	0.084581	-0.0131491	0.10453	0.00711036	0.283784	0.111572
ARAP3	-0.0540238	-0.089787	-0.0430459	-0.0138805	-0.274729	0.0615752	0.0992095	0.483003	-0.309729	-0.295887	-0.440482	0.308109	-0.348484	-0.113031	-0.0780677	0.0702864	0.0848635	0.00868211	-0.238817	-0.0573437	0.200331	0.053987	0.307131	0.185417	0.169682	0.479805	0.132565	0.204623
ARCN1	-1.63649	-1.18861	-1.07353	-1.02372	-1.9943	-1.733	-0.987544	-1.28402	-1.52902	-0.872645	-1.1856	-1.31651	-0.893974	-1.30898	-0.983592	-0.902549	-0.555858	-0.935834	-0.744542	-0.908328	-0.781961	-0.853822	-0.740305	-0.712944	-0.974226	-0.832606	-0.693852	-0.761715
AREG	-1.86891	-1.70303	-1.8657	-1.95287	-2.30363	-1.95462	-0.854302	-1.33557	-1.35475	-1.50574	-2.14557	-1.91408	-1.57655	-2.37806	-0.676885	-1.94785	-2.27346	-1.89025	-1.86298	-2.7128	-1.81003	-1.62754	-1.68769	-2.26775	-1.65964	-1.5636	-1.16591	-1.4697
ARF1	0.234303	0.470547	0.4534	0.424512	0.699004	0.475982	0.241016	0.135834	0.0618816	0.519788	0.491933	0.492692	0.320936	0.355898	0.0441274	0.241338	0.208448	0.350837	0.267157	0.153197	0.336859	0.249254	0.20294	0.604106	-0.0394758	0.0225685	0.345983	0.153148
ARF3	-1.30249	-0.933083	-1.02175	-0.76968	-1.18559	-1.20276	-0.883586	-1.25489	-1.30808	-1.01726	-1.11531	-1.20095	-1.18656	-1.46548	-1.35256	-1.22524	-1.38597	-1.1431	-1.27548	-1.26082	-1.33454	-1.47387	-1.42846	-1.45086	-1.26193	-1.32865	-1.30782	0.0276816
ARF4	-0.593727	-0.415763	-0.4528	-0.197075	-0.679116	-0.519019	-0.291427	-0.54275	-0.49418	-0.284684	-0.500578	-0.578441	-0.295233	-0.560913	-0.349488	-0.251358	-0.144328	-0.257054	-0.215135	-0.312729	-0.356883	-0.359712	-0.318267	-0.406629	-0.349678	-0.232191	-0.294501	-0.224309
ARFGAP1	-0.122306	-0.308369	-0.382304	-0.248726	-0.382753	0.0135005	-0.268185	-0.138872	-0.0473386	0.00764229	-0.526092	-0.0460809	0.185588	-0.210261	0.452886	-0.08742	0.171522	0.0962625	0.0275942	-0.0170109	-0.168108	0.134491	-0.106208	-0.633115	0.0904292	-0.425224	0.272634	-0.478135
ARFGAP2	0.145713	0.324032	0.293733	0.245463	0.371751	0.316869	0.23691	0.221043	0.207715	0.144426	0.289083	0.192687	0.135904	0.124097	0.22129	0.113589	0.174775	0.232265	0.169153	0.00839233	0.124934	0.0857332	0.0348405	-0.1769	-0.0382267	0.117175	0.0332289	0.0222879
ARFGAP3	-0.535928	-0.477502	-0.419227	-0.494294	-0.993837	-0.839773	-0.204423	-0.489953	-0.430001	-0.219671	-0.300494	-0.727104	-0.435388	-0.56342	-0.244534	-0.605588	-0.236151	-0.321286	-0.228184	-0.44457	-0.384429	-0.353481	-0.431965	-0.713173	-0.319627	-0.374808	-0.263192	-0.115427
ARFGEF1	0.371085	-0.0506889	0.0450437	-0.301015	-0.21951	-0.129883	0.144048	0.0233443	0.26573	0.409933	0.0847779	0.209845	0.112932	-0.130419	0.276864	0.51502	0.492252	0.261172	0.106929	0.180915	0.061674	0.373485	0.0910046	-0.0312893	0.297813	0.253497	0.163493	0.135666
ARFGEF2	-0.371138	-0.121693	-0.058275	-0.0875169	-0.100115	-0.312491	-0.198674	-0.031951	-0.134125	-0.229398	-0.181015	-0.334636	-0.112614	-0.207877	-0.0302717	-0.334277	-0.176728	-0.187312	-0.26216	-0.185418	-0.217394	-0.364192	-0.42248	-0.594165	-0.197402	-0.249366	-0.285043	-0.0825454
ARFGEF3	-0.648446	-0.585683	-0.317518	-0.676695	-0.581107	-0.643641	-0.529268	-0.525156	-0.376543	-0.315326	-0.562935	-0.29361	-0.209086	-0.394244	-0.282052	-0.541812	-0.243782	-0.477848	-0.464852	-0.730247	-0.57196	-0.354577	-0.539262	-0.524314	-0.255738	-0.233253	-0.414931	-0.420776
ARFIP1	-0.760102	-0.277628	-0.137474	-0.170462	-0.723591	-0.39822	0.205415	0.0521747	-0.377469	0.254533	-0.453486	-0.286936	-0.137892	-0.289776	-0.00226616	-0.523032	-0.232989	-0.653316	-0.335162	-0.486016	-0.32828	-0.557314	-0.307696	-0.286057	-0.415942	-0.549016	-0.370056	-0.403916
ARFIP2	0.164989	0.305036	0.271274	0.262027	0.108295	0.464342	0.345883	0.387506	0.512057	0.590212	0.178206	0.232131	0.404124	0.346677	0.233885	0.124376	0.00834304	0.140952	0.335668	0.166651	0.520481	0.479545	0.239995	0.482878	0.412103	0.302932	0.345797	0.0727391
ARFRP1	-0.318139	-0.073932	-0.123413	-0.21681	-0.28939	-0.550343	-0.301836	-0.145962	-0.317493	-0.33302	-0.333375	-0.458899	-0.229832	-0.281469	-0.453879	-0.101452	-0.503231	-0.198078	-0.452177	-0.393922	-0.132948	-0.201275	-0.183996	-0.354348	-0.21699	-0.24275	-0.116087	-0.179335
ARG1	0.140539	0.208656	0.158053	0.203083	0.355228	0.0168097	-0.0397027	0.137128	-0.0502889	0.073405	0.265438	0.205551	0.197281	-0.0538071	0.360938	0.15314	0.141604	0.0539874	0.21931	0.212178	-0.0438017	0.242807	0.105155	-0.151994	0.0435362	-0.0321102	0.238884	0.392614
ARG2	-1.28431	-1.19364	-1.0958	-0.615463	-1.41187	-1.54562	-1.01082	-1.49693	-1.31114	-1.03477	-1.32645	-1.27219	-1.05	-1.1915	-1.29461	-1.1415	-1.49309	-1.13615	-1.24914	-1.429	-0.891148	-1.20749	-0.775732	-1.73653	-1.05643	-0.982593	-1.15155	-1.09504
ARGFX	-0.049642	-0.352578	-0.157449	-0.312708	-0.599311	-0.463909	-0.419312	-0.586236	-0.0534178	-0.183601	-0.192429	-0.399536	-0.154336	-0.0502797	-0.0670372	-0.197003	2.18e-05	-0.237179	0.00358377	-0.237622	-0.168428	-0.211891	-0.218528	-0.212567	-0.0325893	-0.00779137	-0.160264	-0.144325
ARGLU1	-0.589642	-0.421647	-0.359861	-0.531259	-0.100075	-0.293387	-0.307357	-0.218664	-0.294991	-0.320568	-0.40768	-0.232636	-0.286956	-0.412034	-0.408423	-0.355798	-0.398626	-0.294303	-0.399542	-0.495103	-0.524979	-0.432267	-0.460071	-0.655917	-0.42815	-0.354958	-0.40967	-0.511367
ARHGAP10	0.158788	0.137124	0.0724717	0.220245	0.160273	0.0569714	0.0516172	0.208616	0.00326508	0.271859	0.127826	0.017848	0.108291	0.128687	0.16486	0.150474	0.165365	0.113914	0.0849497	0.0715702	-0.00343466	0.0642793	0.271109	0.0635806	0.0735662	0.0840444	0.111899	0.026696
ARHGAP12	-0.486672	-0.32639	-0.290611	-0.368522	-0.430225	-0.353767	-0.406681	-0.218248	-0.342178	-0.329006	-0.259582	-0.204005	-0.252595	-0.155435	-0.14198	-0.155025	-0.104601	-0.190201	-0.123407	-0.168576	-0.239681	-0.1164	-0.178103	-0.127124	-0.250497	-0.207834	-0.139969	-0.16422
ARHGAP15	-0.352996	-0.287331	-0.109813	0.0220012	-0.134486	-0.116368	-0.0114139	-0.182465	-0.274782	-0.283748	-0.165672	-0.225506	-0.0808701	-0.266799	-0.0876526	-0.371994	-0.230405	-0.129458	-0.325207	-0.000832001	-0.329886	-0.227305	-0.195953	-0.0519064	-0.299863	-0.301813	-0.120495	-0.0937386
ARHGAP17	0.144865	0.0446838	-0.101788	-0.131868	0.00912138	-0.0914873	-0.111713	-0.135602	0.30026	0.0631273	0.00438362	0.139941	0.0731349	0.15934	0.000715949	0.156644	0.0800361	0.195594	0.197174	-0.059915	-0.0596216	-0.0247355	0.21734	-0.0137848	0.244103	-0.00509784	0.205278	0.19589
ARHGAP19	0.0918827	0.0286965	-0.00533529	-0.153792	-0.121006	-0.0933825	-0.0227257	-0.216066	0.193545	0.133057	-0.0171911	-0.0117985	-0.0271204	0.0217922	0.0393921	0.0843999	0.144781	0.0833977	-0.0344286	0.0213825	0.0486317	0.0598286	-0.204679	-0.300027	0.0149378	-0.0412174	-0.0402083	-0.0870695
ARHGAP20	-0.0651363	-0.00871311	-0.100691	0.082984	-0.0911619	-0.0888762	0.120897	0.0993287	-0.161935	-0.0883872	-0.0587909	-0.0790907	-0.151882	-0.148366	-0.13022	0.0512487	-0.0343175	-0.102433	0.0334113	0.000583045	-0.0538378	-0.0907401	0.00953548	-0.0709022	0.00250889	-0.0233112	-0.0180678	-0.00356905
ARHGAP21	-0.255663	-0.185936	-0.243448	-0.20621	-0.505125	-0.287099	-0.313187	-0.254976	-0.289656	-0.391357	-0.40628	-0.362048	-0.321406	-0.349286	-0.286193	-0.390297	-0.383183	-0.371438	-0.485459	-0.415135	-0.386976	-0.0947897	-0.373548	-0.295442	-0.17449	-0.316379	-0.31015	-0.297151
ARHGAP22	-0.517743	-0.582485	-0.538287	-0.589183	-0.398152	-0.504691	-0.589295	-0.525131	-0.66296	-0.669078	-0.605618	-0.698511	-0.593058	-0.723237	-0.643512	-0.63038	-0.801197	-0.744368	-0.764114	-0.716756	-0.6849	-0.677795	-0.6887	-0.808172	-0.62442	-0.450095	-0.505262	-0.483952
ARHGAP24	-0.0845063	0.203664	0.0383225	-0.0291905	-0.137573	-0.0745328	-0.0761336	-0.0229372	-0.119513	-0.108725	0.0513498	-0.0105352	-0.256208	-0.0409521	-0.226391	0.0426913	-0.131818	-0.101096	0.0594859	-0.0966065	-0.162418	-0.00709079	0.0990393	-0.0277982	0.0449624	-0.252144	0.0116224	-0.0764627
ARHGAP25	-0.555667	-0.225214	-0.271234	-0.481082	-0.638044	-0.46341	-0.315775	-0.0587383	-0.391837	-0.0712432	-0.461251	-0.1777	-0.0873425	-0.345878	0.0804412	-0.291201	-0.193732	-0.115706	-0.198794	-0.350192	-0.179535	-0.280291	-0.467433	-0.314944	-0.306975	-0.209235	-0.227013	-0.219216
ARHGAP26	-0.0119635	-0.0985241	-0.00402971	-0.140707	-0.04826	0.0192923	-0.0877853	-0.0203417	-0.0469371	-0.158714	-0.0382797	0.0240723	-0.0675902	0.0403898	0.106856	0.0543176	-0.0215891	-0.0517709	-0.104215	0.0747828	-0.0410327	0.130849	-0.00949858	-0.00956959	0.0561424	-0.133129	-0.0571006	-0.0246243
ARHGAP26-AS1	0.205893	0.488599	0.27448	0.265066	0.229913	0.377964	0.307508	0.30146	0.423376	0.32038	0.551855	0.391516	0.497329	0.163744	0.309496	0.232581	0.16156	0.265974	0.164495	0.378067	0.0972464	0.247376	0.377069	0.663257	0.0395838	0.250267	0.325912	0.101566
ARHGAP27	0.0485475	-0.163905	0.0327425	0.0151935	0.0108698	-0.0164122	0.000155099	0.00811098	0.0317058	-0.00195086	-0.03762	0.0275603	-0.141205	-0.118948	0.047065	0.100857	0.258474	0.0499439	-0.0195687	0.109699	0.0379616	0.0897704	-0.0817235	-0.0214603	0.0764666	0.0405128	-0.0624561	-0.114933
ARHGAP28	0.0680821	0.279721	0.333584	0.198212	0.466505	0.369834	0.359158	0.529443	0.0318837	0.235801	0.464252	0.526747	0.245111	-0.0731537	0.188987	0.0268669	0.185514	0.32679	0.242266	0.234319	0.146654	0.257177	0.36454	0.46898	-0.0243921	0.166737	0.215083	0.154223
ARHGAP29	0.417282	0.347827	0.254961	0.216018	0.161856	0.278878	0.113722	0.219734	0.579574	0.278239	-0.0669355	0.36593	0.275959	0.383304	0.233406	0.20539	0.26089	0.209272	0.216139	0.17205	0.15849	0.262099	0.109154	0.124971	0.32652	0.275214	0.234164	0.297059
ARHGAP31	-0.893137	-0.572694	-0.86187	-0.885394	-0.828212	-0.78047	-0.637433	-0.611129	-0.843631	-0.524408	-0.658894	-0.417959	-0.481114	-0.131164	-0.377559	-0.433099	-0.546407	-0.404652	-0.659071	-0.426148	-0.348978	-0.238323	-0.235262	-0.353871	-0.213672	-0.396528	-0.240552	-0.344738
ARHGAP32	-0.364627	-0.330987	-0.460531	-0.501723	-0.391639	-0.169592	-0.521467	-0.41374	-0.435541	-0.45921	-0.358047	-0.23125	-0.330251	-0.190043	-0.397646	-0.317193	-0.3514	-0.293767	-0.291589	-0.22049	-0.474624	-0.34308	-0.45352	-0.786379	-0.327347	-0.363447	-0.605299	-0.448454
ARHGAP35	-0.821652	-0.849373	-0.622722	-0.789187	-0.826847	-0.8634	-0.487864	-0.659955	-1.03586	-0.775761	-0.935907	-0.952892	-0.93866	-1.01667	-0.821377	-0.688641	-0.686579	-0.699784	-0.790699	-0.707818	-0.464363	-0.67644	-0.629398	-0.569787	-0.57972	-0.568697	-0.60994	-0.583141
ARHGAP36	0.0160114	-0.00716281	0.0197883	0.0761296	0.140814	0.120537	0.209527	0.174613	-0.10858	0.055389	-0.0196133	0.0226692	0.0238836	-0.207776	-0.0251825	0.124565	-0.0870947	-0.111357	0.137246	0.160529	0.0734942	-0.0632145	0.0587345	0.053843	-0.0422727	0.0243615	-0.0710802	0.130152
ARHGAP39	0.123332	0.0625719	0.0474701	0.198423	-0.0133038	0.169361	0.0676877	0.117138	-0.00169545	0.00244274	-0.00437987	-0.0029529	-0.070567	-0.00927419	0.0331524	0.0572228	-0.0351206	0.0789201	-0.0175065	0.116847	0.0820611	-0.00658001	0.0502063	0.117154	-0.0925175	0.110063	0.0452761	0.0873755
ARHGAP4	0.37854	0.386666	0.287061	0.291788	0.35389	0.358232	0.167047	0.306484	0.434961	0.310279	0.324129	0.292941	0.313197	0.4489	0.129697	0.257487	0.142717	0.280341	0.152447	0.0721754	0.0411923	0.0826891	0.195551	0.00267629	0.190606	0.228679	0.167776	0.166578
ARHGAP5	0.00346715	0.0383089	0.350842	0.280605	0.0886004	0.381959	0.153831	0.0525671	0.0238509	-0.0193758	-0.214981	0.148128	0.209834	0.0986186	0.361746	0.119615	0.114975	0.387944	0.324172	0.130419	0.236954	-0.0493869	-0.0298221	-0.500715	0.106481	0.428826	0.422508	-0.0101902
ARHGAP5-AS1	-0.501433	-0.198412	-0.374619	-0.316696	-0.715261	-0.460536	-0.323892	-0.529813	-0.175581	-0.0988441	-0.225516	-0.423386	-0.0497858	-0.74202	-0.673961	-0.80052	-0.284265	-0.227827	-0.264435	-0.68185	-0.25414	-0.0496532	-0.171299	-0.427152	-0.27928	-0.00964198	0.241639	-0.0955737
ARHGAP6	-0.222048	-0.316307	-0.274941	-0.29303	-0.493324	-0.486677	-0.0870608	-0.455597	-0.312431	-0.244257	-0.368389	-0.239116	-0.702708	-0.37391	-0.190436	-0.284437	-0.332664	-0.298792	-0.484873	-0.384814	-0.397736	-0.422014	-0.308103	-0.433815	-0.277366	-0.566838	-0.287874	-0.555928
ARHGAP9	0.664045	0.388648	0.711763	0.3821	0.58485	0.718031	0.338354	0.636599	0.96876	0.677988	0.364841	0.689995	0.587067	0.762646	0.613068	0.489692	0.962211	1.03876	0.572669	0.830932	0.705378	0.521777	0.634394	0.822072	0.618331	0.46136	0.458159	0.548954
ARHGDIA	0.283585	0.262211	0.181417	0.066083	0.248725	0.0235146	0.16786	0.0955927	0.116937	0.355167	0.277701	0.151657	0.246332	0.0894507	0.180309	0.149908	0.0193722	0.00251046	0.129373	0.239965	0.14124	0.25777	0.0751494	-0.0414405	0.150025	-0.0719599	0.0769559	0.132133
ARHGDIB	-1.15205	-1.09139	-0.841075	-0.732354	-1.30896	-1.30891	-0.345562	-0.748846	-0.77375	0.190077	-0.667457	-0.825929	-0.486635	-0.738916	-0.813501	-0.876218	-0.598001	-0.679852	-0.602991	-0.816062	-0.292225	-0.77307	-0.76317	-0.749132	-0.728281	-0.517293	-0.460008	-0.196599
ARHGDIG	-0.34237	-0.398905	-0.279072	-0.520586	-0.126011	-0.285345	-0.241387	-0.223116	-0.626498	-0.102508	-0.454985	-0.228057	-0.338702	-0.201334	-0.385684	-0.129623	0.0223752	-0.207322	-0.157411	0.00276157	-0.334443	-0.0862928	-0.0407269	-0.186582	-0.0593582	0.004856	-0.0579669	0.00550093
ARHGEF1	0.126878	0.175567	0.175837	0.215471	0.159542	0.23315	0.0881561	-0.201373	0.198472	0.239787	0.35236	0.353981	0.307611	0.092735	0.335082	0.218706	0.405446	0.324763	0.0923784	0.408354	0.236566	0.171855	0.281338	0.298742	0.128906	0.158773	-0.204801	0.228505
ARHGEF10	-0.656882	-0.813068	-0.585108	-0.724719	-0.347888	-0.771306	-0.434034	-0.405421	-0.660473	-0.722331	-0.570265	-0.726379	-0.977671	-0.486365	-0.148335	-0.449504	-0.44578	-0.382712	-0.477646	-0.494553	-0.664916	-0.385777	-0.452216	-0.225717	-0.367411	-0.30396	-0.289421	-0.346911
ARHGEF10L	0.395822	0.270221	0.26686	0.30358	0.205013	0.366916	0.406262	0.298823	0.398056	0.419725	0.482319	0.456924	0.411657	0.446683	0.481767	0.523643	0.657975	0.498532	0.541703	0.546914	0.38758	0.578464	0.502036	0.5905	0.415864	0.516909	0.426431	0.702638
ARHGEF11	-0.261479	-0.292756	-0.130916	0.0447168	-0.0751537	-0.00360448	0.0029466	0.0387239	-0.195309	-0.147465	-0.168396	-0.216743	-0.304105	-0.0695219	0.0978546	-0.224384	0.0471752	-0.0863513	-0.105809	-0.144923	-0.304853	0.0121625	-0.103471	-0.0927391	-0.0195627	0.0381252	0.0953601	0.0147852
ARHGEF12	-0.031934	0.39555	-0.0108434	0.314009	-0.193783	0.0541696	0.432815	0.140337	0.00820615	0.156488	0.185722	-0.0506072	0.065427	0.166685	0.134846	0.450106	0.208878	0.269814	0.535888	0.43347	0.224762	0.319216	0.394417	0.560246	0.284251	0.274207	0.300842	0.302709
ARHGEF15	-0.111916	0.0713179	-0.100335	0.0761722	0.224244	0.112947	0.0542193	0.157911	0.0292187	-0.137315	-0.112457	0.0223006	-0.10532	0.117138	0.321739	0.128655	0.391618	0.295785	0.179371	0.242081	0.392541	0.202457	0.234252	0.595829	0.00646784	0.323105	0.278917	0.44498
ARHGEF16	0.236202	0.17117	0.523954	0.494878	0.497149	0.36708	0.654104	0.43175	0.685182	0.660596	0.447825	0.348553	0.486811	0.350743	0.386658	0.245738	0.261135	0.312204	0.150289	0.193631	0.601385	0.561572	0.411399	0.45688	0.276799	0.424546	0.353931	0.385495
ARHGEF17	0.184959	0.424792	0.449449	0.482452	0.302765	0.460074	0.570056	0.438829	0.458974	0.618728	0.571128	0.596835	0.666536	0.608619	0.47394	0.588284	0.529944	0.738187	0.520832	0.669413	0.58204	0.845154	0.589564	0.920444	0.521959	0.86854	0.718344	0.577853
ARHGEF18	0.121463	0.204885	0.0022721	-0.154593	0.062919	-0.110327	0.134051	0.302019	-0.255727	-0.162533	-0.0255426	-0.311053	-0.278087	-0.161872	-0.05247	-0.0767774	-0.144481	-0.282619	-0.0330301	-0.00422743	-0.0856525	-0.127097	-0.121454	0.114039	-0.091159	-0.239782	-0.142233	-0.204152
ARHGEF19	0.435899	0.422583	0.583629	0.311672	0.243913	0.500073	0.701667	0.295588	0.388963	0.537208	0.549454	0.592619	0.676899	0.451437	0.53613	0.464819	0.458273	0.406083	0.554448	0.289721	0.377822	0.517463	0.511476	0.190203	0.546341	0.654352	0.375095	0.228639
ARHGEF2	-1.04336	-0.84638	-0.930477	-0.614476	-0.759885	-0.85911	-0.648374	-0.642062	-0.991164	-0.742114	-0.814043	-0.729797	-0.768194	-0.842575	-0.734288	-0.635224	-0.843144	-0.462095	-0.678946	-0.604669	-0.77264	-0.60905	-1.1127	-0.986463	-0.627608	-0.719971	-0.777813	-0.981609
ARHGEF25	-0.172342	-0.0803281	-0.0819687	0.0165371	0.0253243	0.0670338	-0.113997	-0.0894171	-0.0144882	-0.0781327	-0.0812722	0.041776	-0.0244227	-0.0309044	0.0381356	0.0966873	-0.239658	-0.0399279	-0.0737552	-0.0718206	0.106063	0.00602253	0.127066	0.257138	-0.0700045	0.106868	0.132119	0.042572
ARHGEF26-AS1	0.299325	0.255135	0.297893	0.196463	0.489919	0.316387	0.236809	-0.0158467	0.335211	0.219659	0.155613	0.275758	0.0581495	-0.0253294	0.0802412	0.111681	0.0717481	0.0193116	0.192857	0.00611579	0.0046483	0.103744	0.0271887	0.141803	0.0647741	0.0954864	0.183121	0.163759
ARHGEF28	-2.19207e-05	-0.110892	0.002977	0.00538595	-0.0255728	0.0809983	0.0378609	-0.0823227	-0.193061	-0.0460475	-0.258276	-0.156646	-0.182468	-0.206149	-0.133038	-0.205609	-0.207235	-0.229213	-0.201636	-0.137443	-0.214739	-0.177666	-0.189527	0.0239952	-0.211869	-0.165421	-0.227287	-0.172453
ARHGEF3	-0.130969	-0.202602	-0.100258	-0.262704	-0.188062	-0.261233	-0.180639	-0.143606	-0.0531103	-0.169516	-0.20598	-0.105833	-0.234795	-0.120886	-0.00324017	-0.0220316	-0.0275354	-0.134339	-0.0684338	0.00202635	-0.0342715	-0.0322296	0.0196347	0.00262306	-0.0438976	0.0625388	-0.107215	0.150146
ARHGEF3-AS1	0.782014	0.432424	0.489434	0.538306	0.537947	0.669341	0.568685	0.461831	0.366854	0.418024	0.259731	0.367824	0.354438	0.289007	0.26735	0.406384	0.361777	0.359309	0.265513	0.479099	0.272742	0.287175	0.415011	0.395489	0.295157	0.286484	0.159601	0.249648
ARHGEF35	1.40482	1.08061	1.10501	1.6388	1.24637	1.33132	1.27345	0.988714	1.40256	1.09728	1.46668	1.38254	1.16282	1.49952	1.40859	1.30879	1.60274	1.12471	1.28077	1.23827	1.53402	1.48639	1.88752	1.97171	1.37427	1.39379	1.52558	1.66457
ARHGEF37	-0.0663281	-0.0760099	-0.207384	-0.0691194	-0.22716	-0.274463	0.165281	-0.0142835	0.0966522	0.25768	0.0830549	0.00703235	0.1468	0.26483	0.143688	0.259845	0.276725	0.201886	0.31436	0.281542	0.0772548	0.217276	0.00119385	0.123496	0.219425	0.250511	0.213271	0.147862
ARHGEF38	-0.116743	-0.165342	-0.0307196	-0.0709066	-0.156082	-0.111011	-0.247079	-0.121476	-0.178522	-0.204047	-0.245082	-0.221664	-0.257954	-0.125176	-0.160643	-0.169313	-0.14889	-0.224346	-0.118242	-0.216403	-0.151946	-0.189157	-0.243699	-0.423602	-0.0554518	-0.177649	-0.206658	-0.208145
ARHGEF4	-0.321738	-0.0163286	-0.0462792	-0.242694	-0.317359	-0.0348529	-0.138407	-0.106161	-0.503686	-0.115804	-0.0898856	-0.0322256	-0.148636	-0.132551	-0.0916245	0.324474	0.0216206	-0.0595773	0.110918	0.0834282	0.184126	0.042791	0.00477396	-0.296969	-0.0852177	-0.0576197	0.0392529	0.182152
ARHGEF40	-0.658515	-0.254475	-0.296518	-0.172332	-0.268237	-0.27036	-0.204927	-0.194331	-0.594555	-0.262915	-0.522525	-0.404075	-0.244392	-0.256691	-0.403742	-0.38216	-0.444512	-0.535281	-0.595335	-0.470157	-0.183406	-0.0983862	-0.447868	-0.192248	-0.115696	-0.0910292	-0.162154	-0.117334
ARHGEF5	0.142385	0.0852517	0.157326	0.0667858	0.286522	0.301064	0.0935727	0.21213	0.102526	0.0698932	0.0967612	0.0892086	0.0432505	-0.0993019	-0.0535833	-0.175118	-0.171067	-0.0925776	-0.0382717	0.0163406	0.0853269	0.0232224	0.128303	0.106672	0.184495	-0.00807763	-0.0756401	-0.0708217
ARHGEF6	0.359842	0.0593205	0.148312	0.251431	0.263354	0.089947	0.0542064	0.0335809	0.116238	0.156226	0.270716	0.262213	0.025002	0.166177	0.00566786	0.285941	0.119086	0.354843	0.198557	0.298856	0.289465	0.458613	0.439048	0.494901	0.3226	0.438262	0.464721	0.316391
ARHGEF7	0.147188	0.168932	0.145009	0.0749444	0.236338	0.111836	0.154372	0.148423	0.16293	0.186915	0.202352	0.0793921	0.087159	0.214312	0.139284	0.23794	0.161619	0.125939	0.218729	0.168602	0.173379	0.221272	0.181335	0.219524	0.171342	0.079564	0.198675	0.160125
ARHGEF9	0.489146	0.325668	0.247748	0.402436	0.303797	0.507157	0.488061	0.348023	0.57567	0.598835	0.385085	0.59029	0.557025	0.663066	0.348107	0.325399	0.387282	0.512738	0.517164	0.520785	0.480043	0.528673	0.633827	0.600029	0.531541	0.411116	0.511213	0.341036
ARID1A	0.0432227	0.158696	0.135007	0.0609729	-0.196222	-0.0036462	0.0721288	0.00816953	0.0585216	0.143743	-0.111341	-0.0296377	0.0608835	-0.106797	-0.32061	-0.0616979	0.00222544	0.00455689	-0.102565	-0.210215	0.0390749	0.0827599	0.00845805	-0.268284	-0.140285	-0.0463624	-0.00300656	-0.408314
ARID1B	-0.16066	-0.105506	-0.156483	-0.300825	-0.135636	-0.200121	-0.0421057	-0.0538379	-0.194798	-0.241481	-0.332322	-0.188994	-0.0430718	-0.278354	0.000191608	-0.00737801	-0.0310557	-0.0686957	-0.0896222	0.112162	-0.0852588	0.0260591	0.0282055	0.0952637	0.121561	-0.0398754	-0.00463216	-0.0118521
ARID2	-0.772762	-0.730657	-0.644626	-0.862046	-0.90505	-0.896832	-0.771159	-0.787466	-0.91004	-0.797426	-0.411107	-0.740725	-0.623432	-0.727484	-0.449971	-0.619695	-0.592396	-0.41478	-0.433622	-0.726783	-0.639811	-0.52856	-0.652604	-0.731577	-0.453351	-0.298948	-0.56459	-0.591627
ARID3A	-0.0202755	0.164337	-0.168699	-0.339653	-0.0492403	-0.113891	-0.172449	-0.205776	-0.228082	-0.219601	-0.199183	-0.210032	-0.210727	-0.147476	-0.0774865	-0.0243349	-0.0346797	-0.0164505	-0.0648787	-0.0615619	-0.0140786	0.0533947	0.0868595	0.0974652	-0.149896	-0.0580704	-0.0128616	-0.106139
ARID3B	0.168671	0.116989	0.18254	0.381892	0.19407	0.248352	0.114257	0.164412	0.300736	0.0962572	0.30011	0.267143	0.0641929	0.188502	0.249429	0.272081	0.0717485	0.046835	0.104002	0.122596	-0.057819	0.0831833	0.141764	0.0140549	-0.0542717	0.04522	0.146095	0.0606946
ARID4A	0.0484505	0.273015	0.0981959	0.0535665	0.20228	0.25814	-0.126317	0.0722025	0.0256214	0.129755	-0.0887161	0.0461406	0.0144661	0.0160155	-0.023095	-0.0189974	-0.0580011	0.0787745	0.0982311	0.162605	0.104235	-0.0804237	0.0888745	-0.00400924	0.0527878	-0.018495	-0.0155254	-0.0498646
ARID4B	0.136775	0.012741	0.176794	0.0421628	0.190526	0.29418	0.0781246	0.288946	0.370602	-0.0306298	0.101136	0.145409	0.265684	0.201617	0.165406	0.127394	0.0992815	0.105015	0.0813744	0.208381	-0.0137089	0.174082	0.0736208	0.00439899	0.0548285	0.12073	0.0706452	0.0739191
ARID5A	0.582074	0.340801	0.018057	0.232709	0.265177	0.41043	0.568584	0.299871	0.435833	0.592832	0.488651	0.274335	0.213024	0.226898	0.294764	0.663099	0.251011	0.223773	0.511851	0.451635	0.45658	0.433233	0.740615	0.92529	0.375645	0.447694	0.506237	0.525378
ARID5B	-0.0941628	-0.0668055	-0.101653	-0.0912135	-0.171704	-0.174303	0.0169915	0.189923	0.188426	0.11885	-0.0822321	-0.171975	0.00687367	0.258516	0.385269	0.115062	0.235203	0.0416401	0.325875	0.0407123	0.23611	0.16099	0.236429	0.178869	0.105177	0.136039	0.242272	0.309558
ARIH1	-0.0667984	-0.251357	-0.317941	-0.323606	-0.20677	-0.126715	-0.343677	-0.160115	-0.0119077	-0.231964	-0.147516	-0.225356	-0.217799	-0.209045	-0.249992	-0.251329	-0.224806	-0.256471	-0.195578	-0.13933	-0.273143	-0.185888	-0.341281	-0.397464	-0.214224	-0.31054	-0.253829	-0.320504
ARIH2	-0.144475	-0.330731	-0.347616	-0.246303	-0.213869	-0.128349	-0.231996	-0.118812	-0.243595	-0.231242	-0.299105	-0.256371	-0.205166	0.000153676	-0.031716	-0.056719	-0.124656	-0.00439413	-0.0858301	-0.0775534	-0.155816	-0.0146869	0.0676758	0.00073768	-0.0672545	0.046773	0.0943048	0.0428021
ARL1	-0.481514	-0.50272	-0.528052	-0.621646	-0.555869	-0.695364	-0.795586	-0.751438	-0.45503	-0.392802	-0.424729	-0.523346	-0.293671	-0.725609	-0.25016	-0.335569	-0.307632	-0.347073	-0.116646	-0.480537	-0.313592	-0.355158	-0.590927	-0.580617	-0.178743	-0.270273	-0.0642106	-0.0132962
ARL10	-0.0420441	0.0970553	0.0883985	-0.0554251	0.0789374	0.279458	0.163172	-0.254967	0.250451	0.0125895	0.247814	-0.164511	0.0559291	0.000818201	0.0329914	0.137056	-0.0335956	0.268546	0.0138979	0.137177	-0.138261	0.313934	0.1242	0.0222987	0.0838369	0.262476	0.150949	0.189279
ARL11	-0.0633589	-0.258568	0.131958	-0.0893053	0.172068	0.0207172	-0.124854	0.0218201	-0.12937	-0.204183	-0.210166	-0.246543	-0.291719	-0.186157	-0.182663	-0.139912	-0.376101	-0.393931	-0.334654	-0.218581	-0.268329	-0.41259	-0.361495	-0.56754	-0.225096	-0.415037	-0.664482	-0.440845
ARL13A	0.477493	0.507118	0.62789	0.456889	0.717282	0.653497	0.556222	0.548285	0.93411	0.908721	0.665073	0.947623	0.6516	0.925864	0.170387	0.302729	0.55859	0.523532	0.448602	0.488897	0.307514	0.355523	0.393629	0.573996	0.157147	0.412286	0.0849325	0.241185
ARL13B	-0.149491	-0.436176	-0.128781	-0.567074	-0.399059	-0.11957	-0.176146	-0.331381	-0.421141	-0.262514	-0.300457	-0.142726	-0.292024	-0.376918	-0.411705	-0.296425	-0.42993	-0.193662	-0.167488	-0.30825	-0.0559073	-0.217124	-0.499439	-0.541303	-0.0592512	-0.235203	-0.0152474	-0.353652
ARL15	0.0633972	0.21456	-0.0703163	0.316282	0.240732	0.280493	0.44601	0.0803521	0.314116	0.200211	0.258386	0.201663	0.197911	-0.0190994	0.203487	0.203915	0.0534727	-0.19582	0.0264533	0.0690421	0.0324622	0.224493	0.165672	0.550196	0.0748148	0.161561	0.278604	0.250525
ARL17B	0.230136	0.193001	0.245769	0.269969	0.323215	0.226368	0.184855	-0.115873	0.245078	0.503352	0.162912	0.109442	0.232081	0.634622	0.159948	0.156384	0.33045	-0.108741	0.240691	0.255484	0.0463465	0.0407175	-0.0883193	-0.0254377	-0.125462	0.279949	-0.214403	-0.0398868
ARL2BP	-0.213017	0.213725	-0.0411394	-0.066557	-0.288487	-0.292901	0.120349	-0.360137	-0.175681	-0.132244	-0.064725	-0.120907	-0.11152	0.0284932	0.17385	-0.016992	0.239137	0.0855915	-0.084043	0.0745949	-0.00407498	0.0901047	0.0068322	-0.0829565	0.055054	-0.00946486	0.0845623	0.187424
ARL3	-0.151098	-0.0211767	0.0937372	-0.179565	-0.111245	-0.150238	-0.502977	0.128286	-0.09177	-0.0251708	0.154877	0.0906566	-0.134319	-0.128678	0.0720153	0.18577	0.345943	0.158589	0.159358	0.178698	-0.230423	-0.0672163	0.13323	0.059745	0.0838334	-0.0941097	-0.215351	-0.107754
ARL4A	-0.562394	-0.266044	-0.284816	-0.426638	-0.228574	-0.523727	-0.504242	-0.376445	-0.80221	-0.505917	-0.58068	-0.450744	-0.483925	-0.542486	-0.538969	-0.351749	-0.664489	-0.470064	-0.587993	-0.668227	-0.684486	-0.68292	-0.877733	-1.07817	-0.594888	-0.795344	-0.66183	-0.354772
ARL4C	0.388593	0.554507	0.366671	0.571539	0.730673	0.503423	0.137516	0.303289	0.447439	1.22509	0.317809	0.385273	0.347552	0.0791733	0.209785	0.0117759	0.1278	0.186805	0.0545019	0.0178244	-0.0333359	0.130771	0.0951911	0.203121	0.0222589	0.139459	0.144754	0.330039
ARL4D	-0.0765754	0.0532299	0.0688408	-0.263013	-0.104831	-0.164793	-0.063853	-0.116282	-0.01156	0.180511	-0.177106	-0.0418723	0.144268	0.20687	-0.109634	0.12509	0.251268	0.185488	0.125687	0.0719625	0.187699	0.189282	0.0634156	-0.199959	0.267054	0.153608	0.117384	0.214701
ARL5A	-0.179822	-0.281883	-0.195579	0.0451118	-0.0928614	-0.182624	0.0479879	0.202798	0.119933	-0.0105932	0.032916	-0.0254739	0.068536	-0.00648095	-0.125233	0.0249679	0.263242	0.0612244	0.0425278	0.0375973	0.115338	0.024314	0.130082	0.113668	0.200377	0.0311378	0.197805	0.374192
ARL5B	-0.382471	-0.275116	-0.331826	-0.212355	-0.0840727	-0.022068	-0.415211	-0.0561627	-0.315	-0.304653	-0.276866	-0.110143	-0.255315	-0.273036	-0.0393233	-0.205359	-0.304281	-0.110979	-0.192329	-0.276772	-0.156861	-0.117968	-0.293475	0.0693614	-0.195684	-0.0908104	-0.310898	-0.291632
ARL6	-0.0594601	0.212133	0.233049	-0.14942	0.10071	-0.127922	-0.0928366	0.168871	-0.0517521	-0.0829894	0.0386479	-0.146198	-0.0603205	-0.0562157	-0.0711444	0.0839221	-0.0919275	0.0951963	0.103584	-0.172389	-0.144412	-0.131843	-0.232871	-0.176844	-0.175991	-0.0669103	-0.0883281	-0.150886
ARL6IP1	-1.21535	-0.840449	-0.774338	-0.951703	-0.959909	-1.4153	-1.28419	-1.1191	-1.37619	-1.10426	-1.34744	-1.14353	-1.26972	-1.39733	-1.1807	-0.901663	-1.07515	-0.832836	-0.997377	-0.943381	-1.04756	-1.09835	-1.33708	-1.49761	-0.80478	-1.0673	-0.735103	-0.851198
ARL6IP5	0.444601	0.216702	0.0300328	0.458266	0.203363	0.340331	0.497636	0.19343	0.287006	0.481174	0.374856	0.478631	0.326924	0.30309	0.272122	0.341784	0.782986	0.408548	0.327974	0.331244	0.329057	0.431027	0.251263	0.708672	0.286276	0.390632	0.421791	0.537529
ARL6IP6	-0.583616	-0.576364	-0.605065	-0.546763	-0.669167	-0.744314	-0.400926	-0.511299	-0.611664	-0.546662	-0.79705	-0.459594	-0.412272	-0.391845	-0.480064	-0.572429	-0.467682	-0.433979	-0.52999	-0.433998	-0.566425	-0.349306	-0.527181	-0.61422	-0.449832	-0.386039	-0.371242	-0.471068
ARL8A	-0.186701	-0.191983	-0.283159	-0.124341	-0.109121	-0.145648	-0.13711	-0.139708	-0.221085	-0.21102	-0.0691854	0.0827875	-0.318147	-0.102173	-0.118996	-0.129283	-0.212212	-0.0247647	-0.149394	-0.0801065	-0.256613	-0.0287229	-0.203527	0.0254702	0.0515256	-0.0517862	-0.0635822	-0.0296519
ARL8B	-0.218641	0.068653	-0.0327488	-0.171921	-0.228423	-0.130363	0.399956	-0.283214	-0.355052	-0.032752	0.0205033	-0.175261	-0.146779	-0.0254398	0.242667	0.378704	0.249668	0.157579	0.496019	0.384743	0.15828	0.140527	0.331656	0.0384754	0.121188	0.419312	0.149871	0.223613
ARL9	0.105357	0.220709	0.211135	0.247277	0.346002	0.250156	0.39224	0.20155	-0.121156	0.100662	0.0787789	-0.00300815	-0.0130605	0.197872	0.192104	-0.0982208	-0.106725	0.0880208	-0.00837111	-0.141158	-0.00577908	0.194691	0.0567391	-0.0646412	0.137486	0.031382	0.0847737	0.00423008
ARMC1	-0.55284	-0.405561	-0.451572	-0.543415	-0.24431	-0.444147	-0.465677	-0.304071	-0.617615	-0.490824	-0.243678	-0.349518	-0.384723	-0.440377	-0.168608	0.0104457	-0.113199	-0.0860944	-0.341788	-0.182797	-0.442511	-0.243608	-0.315438	-0.146019	-0.335914	-0.0906246	-0.202185	-0.282039
ARMC10	0.35833	0.169166	0.417784	0.0365482	0.379185	-0.0662104	-0.167119	0.0212652	-0.0755608	0.23614	-0.209898	-0.137162	-0.15918	-0.400981	-0.0564018	-0.212247	-0.076967	-0.253636	0.102475	-0.382498	0.0214679	0.0165477	0.0700427	-0.0305598	0.0792007	0.0538018	-0.192049	0.146096
ARMC2	0.201299	0.119888	0.343913	0.393571	0.223337	0.164028	0.0632612	0.109742	0.155987	0.170631	0.17159	0.158391	0.276805	0.183066	0.209254	0.156799	0.252373	0.252927	0.169492	0.131991	0.142115	0.156026	0.205331	0.215861	0.143285	0.213436	0.0753433	0.212705
ARMC3	0.47322	0.37615	0.290035	0.236229	0.221112	0.245604	0.153743	0.355748	0.886242	0.400985	0.237353	0.371453	0.309478	0.48759	0.193631	0.205001	0.158102	0.197258	0.167574	0.130626	0.186897	0.293689	0.177003	0.411611	0.150738	0.300456	0.227992	0.0873068
ARMC4	0.0476466	-0.0259611	-0.0243265	0.0609227	-0.0237819	0.0214335	-0.0366951	0.0915339	-0.010879	0.0335811	-0.151302	0.050625	0.0297616	-0.0286514	-0.060146	-0.036901	0.0100355	0.0358842	-0.101363	-0.106142	0.00527248	0.0429707	-0.0482	-0.163837	0.00423013	0.0122323	0.135964	-0.0660112
ARMC6	0.169289	0.0409222	-0.104144	0.0338069	-0.0296345	-0.0300187	0.109239	0.0608743	0.260028	0.356588	0.190169	0.164596	0.273772	0.106957	0.273334	0.105888	0.127409	0.102422	0.356074	0.131438	0.0986258	0.169945	0.126071	0.0764402	0.0467247	0.189219	0.145951	0.223114
ARMC7	0.272693	0.356424	0.352185	0.376977	0.135172	0.307065	0.259971	-0.0936962	0.122021	0.105798	0.357664	0.161875	0.366035	0.215906	0.0620876	0.0919087	0.152087	0.138908	0.192503	0.366736	0.170698	0.0625404	0.0641323	-0.237142	0.152627	0.195022	0.371194	0.161781
ARMC8	0.169448	0.244272	0.0909718	0.159778	0.0726555	0.107597	0.208694	0.0866432	0.00359278	0.287564	0.133266	0.090392	0.000755838	0.0522668	0.0611514	0.236487	0.181371	-0.0270763	0.108523	-0.0919655	0.135265	0.125444	0.000433674	0.195481	0.0373628	0.0221246	0.117455	0.137893
ARMC9	-0.212121	-0.230739	-0.253806	-0.310089	-0.289928	-0.22262	-0.12318	-0.240402	-0.366031	-0.240351	-0.332399	-0.208495	-0.317138	-0.188933	-0.0954604	-0.207263	-0.168418	-0.186483	-0.27974	-0.209012	-0.335646	-0.160428	-0.34279	-0.468099	-0.139088	-0.167932	-0.164268	-0.296738
ARMCX1	0.414323	-0.363239	0.0933785	-0.263896	-0.198715	0.043264	-0.200246	0.481154	0.0292592	-0.549224	0.0582667	0.295103	-0.126045	-0.272237	0.168581	0.108186	0.792663	-0.13628	0.363988	0.261223	0.104689	0.415737	0.194686	0.667552	0.640945	0.348375	0.571623	0.463941
ARMCX2	-0.52737	-0.650733	-0.463793	-0.281437	-0.500148	-0.297741	-0.385726	0.105209	-0.30796	-0.233417	-0.0859276	-0.0842919	-0.204418	-0.257639	-0.238897	-0.0519124	0.542672	0.246214	-0.155517	0.11963	0.100807	-0.0109089	-0.121359	0.0344603	-0.0825262	-0.0168862	0.0425589	0.0862647
ARMCX3	0.221981	0.0997784	0.240673	0.0339232	0.299339	0.277842	0.0830722	0.470265	0.231303	0.130635	0.172361	0.356769	0.0286469	0.203979	0.063907	0.164323	0.085242	-0.0145593	-0.0423721	0.199885	0.310912	0.216219	0.288895	0.428749	0.393868	0.0916501	-0.0290041	0.0823481
ARMCX5	0.266794	0.17696	0.300624	0.365966	0.178539	0.121134	0.138283	0.222507	0.133146	0.155382	0.258235	0.196492	0.236985	0.0232105	0.204636	0.148608	0.05478	0.0418245	0.0866523	0.0111946	-0.00514553	-0.00920058	0.0295681	0.0729401	-0.0476421	0.186313	0.0816992	0.0685615
ARMCX6	-0.461696	-0.511046	-0.415992	-0.067695	-0.463227	-0.218437	-0.394184	-0.326819	-0.278984	-0.195699	-0.269271	-0.0791567	-0.383187	-0.218574	-0.301107	-0.0389921	-0.127739	-0.036731	-0.359842	-0.161864	-0.13774	-0.390681	-0.183818	-0.258699	-0.175982	0.0315519	-0.00286033	-0.0754614
ARMT1	-0.501031	-0.0585743	7.37e-05	-0.148132	-0.277206	-0.119033	-0.176049	-0.0487731	-0.296026	-0.199952	-0.235743	-0.107448	-0.143764	-0.200037	-0.0412807	-0.277914	-0.368576	-0.177756	-0.490407	0.116591	-0.232931	-0.195109	-0.150277	0.0245173	-0.420725	-0.301812	-0.312102	-0.310147
ARNT	0.0768747	0.275769	0.261256	0.0740433	0.145894	0.27524	0.0484276	0.0157317	0.206006	0.196319	0.169051	0.381233	0.128615	0.283377	-0.0106453	0.0890037	0.156753	0.181044	0.0189123	0.0935763	0.177427	0.0841059	0.00245983	-0.0337015	0.0805377	-0.0156782	0.088884	-0.0260371
ARNT2	0.0253547	0.00152078	-0.0260128	-0.320242	-0.0611829	-0.437663	-0.360011	-0.106663	0.277833	0.0507375	-0.18296	-0.466095	-0.113123	-0.111908	0.0869782	-0.114943	0.0713153	0.0610995	0.0721604	0.0418044	0.10337	0.222186	0.0339767	0.15651	0.154484	0.202573	-0.067898	0.224108
ARNTL	-0.201878	0.164739	0.275242	0.0745626	0.0506856	-0.0723356	-0.0124693	0.173749	0.065633	0.0727052	0.262697	0.138323	0.0703998	-0.114517	0.0422496	0.0577437	-0.00991913	-0.450597	0.134801	-0.0384688	-0.109921	-0.202704	-0.162653	-0.24569	-0.101023	-0.124789	-0.161056	-0.0558472
ARNTL2	-1.08342	-0.46616	-1.19399	-0.851465	-1.03513	-1.195	-0.869624	-0.985461	-1.02847	-0.847114	-1.11588	-1.00417	-1.16149	-0.760766	-1.12887	-1.0372	-0.911731	-0.508013	-0.811856	-0.950962	-0.806933	-0.622016	-0.900313	-0.926001	-0.614172	-0.55221	-0.617771	-0.554507
ARPC1A	-1.02657	-0.751176	-0.963187	-0.574438	-0.714708	-0.774023	-0.687822	-0.57753	-0.593943	-0.583497	-0.706834	-0.521667	-0.631011	-0.435917	-0.701671	-1.11695	-0.839192	-0.967152	-0.850775	-1.01226	-0.810286	-0.516336	-0.557778	-0.547033	-0.75087	-0.786348	-0.803751	-0.75329
ARPC1B	-0.0328116	-0.157518	-0.137958	-0.040984	0.103877	-0.246665	0.026504	-0.124526	-0.0631517	-0.0798432	-0.221912	-0.124751	-0.138251	-0.0869259	-0.0465797	0.0988124	-0.0202668	-0.115042	0.00111091	0.0292878	-0.316618	-0.0975005	-0.00114243	-0.0747482	-0.0736037	-0.0760427	0.0470781	-0.304612
ARPC2	-1.57841	-1.05119	-1.51239	-1.34388	-1.37127	-1.56339	-1.44	-1.15969	-1.28643	-1.28859	-1.55176	-0.921609	-1.27798	-0.894269	-1.28928	-1.29308	-1.25476	-1.25284	-1.3098	-1.36822	-1.50273	-1.0983	-1.19489	-1.38593	-1.31478	-1.44972	-1.52013	-1.29968
ARPC3	-2.58763	-1.92167	-2.06523	-1.41683	-2.49319	-2.20961	-1.16392	-1.84921	-1.89319	-0.79419	-1.40902	-1.7545	-1.4285	-1.85927	-1.78992	-1.87845	-1.76308	-2.00491	-1.74418	-1.94029	-1.58346	-1.81592	-1.66236	-1.49433	-1.86079	-1.70679	-1.63906	-1.35667
ARPC4	-0.114833	0.373578	0.259296	0.374716	-0.0147869	0.253217	0.793157	0.375806	0.21595	0.491523	0.457978	0.326015	0.62435	0.370059	0.217009	0.183407	0.528019	0.341116	0.330128	0.311758	0.359584	0.433302	0.150891	0.0413137	0.157125	0.243212	0.0275798	0.219135
ARPC5L	0.0628685	-0.0544832	0.140464	0.0947102	0.108261	-0.0148535	-0.089995	0.101435	-0.0758478	-0.20751	-0.202683	-0.127459	-0.232045	-0.119313	-0.147866	-0.104722	0.00170563	-0.167151	-0.105823	-0.0671943	-0.205679	0.0800086	-0.080996	0.123139	-0.0365673	-0.0885843	0.105408	0.0588239
ARPIN	0.107576	0.0283635	-0.119143	-0.212316	0.11633	-0.25314	-0.240624	-0.134348	-0.422611	-0.123024	-0.356346	-0.0695057	-0.116324	0.027395	-0.0992727	-0.0700586	-0.115877	-0.0554486	-0.115987	-0.134742	0.0191476	0.0372639	0.131339	-0.281997	0.147143	0.244799	0.0706866	-0.0491427
ARPP19	-0.596226	-0.391219	-0.432316	-0.431105	-0.492046	-0.56364	-0.253327	-0.399118	-0.584362	-0.508204	-0.350514	-0.442561	-0.315469	-0.663409	-0.484703	-0.509651	-0.496765	-0.503868	-0.469369	-0.727825	-0.471915	-0.465546	-0.582241	-0.834197	-0.523939	-0.538858	-0.711572	-0.483752
ARPP21	-0.138834	0.0720818	0.172936	-0.0426583	0.0664191	0.122977	0.0943465	0.201141	-0.120054	-0.0289236	-0.0569705	-0.0646436	-0.0476747	0.0713361	-0.0633494	-0.0310164	-0.0348658	-0.0363237	0.0644387	0.0784627	-0.0346859	0.0414263	-0.0788279	-0.152993	-0.00234548	-0.0535713	-0.0983921	-0.0551194
ARR3	-0.0302483	0.123821	-0.12335	0.141582	-0.0457571	-0.0917744	0.30796	0.0702602	-0.0365603	-0.0711525	0.0741714	0.0437293	-0.063634	0.0435914	0.0562502	-0.0310634	0.254174	0.107521	0.22878	0.137732	0.130374	0.0091926	0.118144	0.122538	0.13861	0.132608	0.0867135	0.0189518
ARRB1	0.254254	0.207747	0.154677	0.126495	0.26806	0.248727	0.191741	0.224635	0.248538	0.315684	0.0776789	0.283458	0.195193	0.210401	0.117511	0.152279	0.160562	0.0460466	0.119188	0.0936762	0.270589	0.217624	0.249237	0.206569	0.155212	0.18799	0.0235558	0.116367
ARRB2	0.826068	0.353158	0.397116	0.799403	0.826302	1.24309	0.644165	0.696543	0.618057	1.12692	0.789709	0.9039	0.516782	0.783551	0.717397	0.871109	0.649989	0.685278	0.653893	0.797759	0.650906	0.615702	0.542088	0.757633	0.356556	0.463364	0.34343	0.45968
ARRDC1	0.052737	0.0315826	0.148884	0.338343	0.1914	0.0543887	0.217172	0.14794	0.154484	0.112212	0.111427	0.0640475	0.166485	0.0908962	0.258316	0.190182	0.243194	0.0476683	0.159918	0.116756	0.169571	0.137	0.171997	0.403824	0.173459	0.134522	0.206276	0.287316
ARRDC2	-0.217489	-0.161985	-0.283676	-0.11379	-0.111228	0.023119	-0.08619	-0.159817	-0.41205	-0.206408	-0.187097	-0.060467	-0.162834	-0.729572	-0.138232	-0.276018	-0.128186	-0.277196	0.196192	-0.312659	-0.148792	-0.10534	-0.0020182	0.216677	-0.243846	-0.138674	-0.0687167	0.0538568
ARSA	0.0275504	-0.278809	-0.294647	-0.122607	-0.140656	-0.118125	-0.278697	0.0800874	-0.420736	-0.517728	-0.273715	-0.297402	-0.322986	-0.261983	-0.0244133	-0.0195716	-0.152347	-0.0986029	-0.249615	-0.0764888	-0.156469	0.0317499	-0.0194332	0.0647596	-0.0242805	-0.00932619	-0.174068	-0.110592
ARSB	-0.0666956	-0.0298222	-0.162402	0.120212	0.0362837	0.0191906	-0.24492	-0.23112	-0.00619441	0.140603	-0.0126294	0.0811942	0.122141	0.0525398	-0.0910956	-0.106727	-0.0649168	0.0222522	-0.124275	-0.157197	-0.0787232	-0.0189237	-0.0442651	-0.00543185	-0.0998646	-0.023671	-0.0554257	-0.00486826
ARSD	0.0276441	0.154525	0.0751766	0.141589	0.0548093	0.107812	0.0645337	0.0839109	0.0224531	0.102323	-0.052385	0.0659301	0.111598	0.202585	0.0690147	0.0068711	0.139605	0.149521	0.107932	0.07489	0.261194	0.115583	0.0713437	0.190631	0.241723	0.0649646	0.0266378	0.147232
ARSE	-0.706548	-0.621231	-0.446665	-0.528301	-0.848229	-0.610529	-0.721132	-0.818228	-0.49467	-0.331315	-0.496445	-0.468661	-0.107327	-0.407987	-0.426552	-0.142026	-0.398345	-0.350937	-0.319714	-0.495839	-0.353366	-0.331906	-0.340493	-0.540666	-0.387846	-0.0654844	-0.444025	-0.31059
ARSF	0.189628	0.366695	0.466379	0.279583	0.468829	0.341385	0.198495	0.032301	0.334255	0.168153	0.249806	0.206843	0.168124	0.331373	0.0978806	0.0608179	0.25481	0.191316	0.188999	0.325743	0.380642	0.296744	0.291992	0.0666903	0.469501	0.248931	0.366527	0.260967
ARSG	-0.340306	-0.105487	-0.357083	-0.307358	-0.342808	-0.456662	-0.268466	-0.211527	-0.452468	-0.329044	-0.306642	-0.277797	-0.24155	-0.189729	-0.269265	-0.252595	-0.223221	-0.137818	-0.251697	-0.283633	-0.152556	-0.108688	-0.286567	-0.374867	-0.238885	-0.161734	-0.230808	-0.179335
ARSK	-0.502413	-0.296929	-0.341997	-0.267425	-0.225819	-0.337784	-0.345177	-0.206766	-0.386996	-0.254431	-0.274341	-0.275639	-0.200267	-0.328364	-0.150824	-0.175046	-0.225403	-0.175936	-0.155808	-0.204537	-0.154937	-0.192897	-0.196748	-0.329298	-0.0956151	-0.247984	-0.35258	-0.293611
ART3	0.945963	0.837	0.965715	1.00151	0.950397	0.927162	0.555869	0.805128	1.42425	0.910597	0.948143	1.08295	1.04233	1.09179	0.939731	0.814966	0.789304	0.563613	0.723515	0.574804	1.03297	0.825111	1.06498	1.34003	0.922561	0.725987	0.885266	1.14123
ART4	0.284974	0.0742097	0.166121	-0.024165	0.149186	0.102681	0.000155786	0.072494	0.0264878	0.139939	0.135725	-0.0637594	0.0353364	-0.189526	0.0739867	0.0297107	0.0648127	0.0639742	0.112207	0.120434	0.0606454	-0.0575478	0.107373	-0.137125	-0.0137012	0.00385375	0.0548118	0.0471114
ARVCF	0.0791497	0.17975	0.187137	0.240543	0.356445	0.276664	0.165369	0.224974	0.0503826	0.0946161	0.424274	-0.0181242	0.0964599	0.163881	0.251066	0.24551	0.190078	0.0755557	0.0981567	0.139577	0.250214	0.330934	0.297574	0.225471	0.164679	0.203657	0.21702	0.224674
ARX	-0.10402	-0.0508675	-0.371741	-0.0141211	0.0995678	0.00838665	-0.380947	-0.15584	-0.290847	-0.0520316	-0.0541017	0.135824	-0.0857447	-0.0815546	0.00754611	0.0243691	-0.100542	-0.238004	-0.1052	0.0726217	-0.156933	-0.202758	-0.13502	0.110309	-0.057954	-0.0552924	0.105081	-0.00163386
AS3MT	0.307857	0.20779	0.448844	0.360284	0.416717	0.138471	0.318931	0.355444	0.526593	0.113855	0.319005	0.203249	0.231092	0.175465	0.189734	0.0853966	0.213689	0.144154	0.142463	0.100832	0.272283	0.15459	0.19281	-0.0211454	0.16787	0.0529042	0.100271	0.034763
ASAH1	2.03056	1.20564	1.60441	2.24676	1.50726	1.76462	1.51736	1.92161	2.08318	1.65947	2.01575	1.98695	1.88747	2.05912	2.42847	2.85081	3.29605	2.63847	2.57881	2.95033	2.60083	2.7919	2.39732	2.75135	2.55706	2.98459	2.59835	2.9165
ASAP1	-0.465111	-0.35508	-0.506683	-0.683257	-0.565791	-0.601363	-0.57016	-0.589644	-0.737274	-0.523507	-0.834644	-0.701125	-0.687398	-0.591539	-0.676635	-0.618661	-0.707567	-0.740331	-0.744729	-0.709814	-0.682081	-0.66614	-0.868196	-0.671567	-0.577916	-0.657387	-0.738805	-0.576718
ASAP2	-0.37197	-0.24634	-0.404941	-0.593549	-0.287676	-0.326906	-0.67606	-0.339227	-0.521399	-0.849939	-0.413174	-0.144279	-0.581605	-0.445007	-0.54208	-0.393648	-0.70443	-0.535224	-0.470581	-0.454583	-0.669812	-0.485865	-0.280538	-0.729793	-0.586733	-0.485666	-0.327592	-0.423641
ASAP3	-0.0741499	0.0686356	0.104352	0.386651	0.233887	0.432932	0.256459	0.163612	0.17766	0.184627	0.214891	0.303995	0.176873	0.218835	0.207627	0.157704	0.40203	0.339637	0.368263	0.179267	0.32328	0.194335	0.253917	0.0796399	0.0869446	0.157517	0.125695	0.314591
ASB12	-0.038824	-0.157735	-0.195246	-0.213713	-0.0512625	0.0180004	0.0975406	-0.18119	0.115453	-0.00327584	0.0297861	-0.0599197	-0.105967	-0.0684852	0.0876616	-0.167011	-0.240117	-0.057474	-0.0772007	0.0166242	-0.103173	0.0316201	-0.0174037	0.0636979	-0.102595	-0.0800108	-0.0949782	-0.14923
ASB14	-0.39602	-0.191607	-0.185953	-0.324691	-0.247388	-0.256263	-0.359936	-0.25064	-0.0658931	-0.145619	-0.240822	-0.248776	-0.144987	-0.175346	-0.168062	-0.437412	-0.359713	-0.201992	-0.384073	-0.330911	-0.347673	-0.167573	-0.286916	-0.402956	-0.22703	-0.29463	-0.317395	-0.204456
ASB3	-1.32266	-1.12503	-1.4065	-1.20511	-0.803345	-1.02245	-0.908606	-1.07911	-1.0513	-1.2794	-0.897563	-0.87678	-1.02532	-0.813268	-0.889417	-0.764988	-0.589014	-0.35445	-0.810049	-0.406783	-0.75812	-0.688865	-0.90508	-0.883758	-0.32459	-0.565638	-0.575891	-0.694892
ASB4	-0.221824	-0.0358096	-0.0531017	0.0776413	0.0516298	-0.00431229	-0.0874555	0.0877612	-0.0842524	-0.176233	-0.091	-0.0877511	-0.249384	-0.143688	-0.194992	0.0362152	0.0754741	-0.101851	-0.0738786	-0.062522	-0.00469986	-0.154116	-0.17245	-0.0519203	-0.15952	-0.122883	-0.172312	-0.137885
ASB5	0.243172	0.570136	0.429691	0.531329	0.180063	0.396831	0.232028	-0.389649	0.263171	0.15861	0.4639	0.421462	0.814758	0.244104	0.148863	-0.127599	0.192235	0.148846	0.0347163	0.40481	0.272378	0.24676	0.531077	0.271414	0.174143	0.067278	0.140234	0.0349756
ASB6	0.408999	0.294411	0.478117	0.402776	0.47741	0.531061	0.519295	0.422874	0.282276	0.355622	0.456377	0.350792	0.131138	0.336023	0.183423	0.187919	0.0225454	0.16653	0.109024	0.166564	0.134375	0.0434221	0.00135723	0.140462	0.128284	0.131205	0.0552131	0.178246
ASB7	0.0811989	0.100749	0.256108	0.196048	0.184625	0.211723	0.0336394	0.244559	0.245045	0.197594	0.0216208	0.0644442	0.20168	-0.0233515	0.094648	0.0635558	0.0812439	0.141052	0.140547	-0.0606559	-0.0618289	0.106554	0.136331	-0.37733	0.0377236	-0.0109044	-0.11432	0.182641
ASB8	0.356294	0.257672	0.328167	0.271851	0.23479	0.256471	0.168663	0.267914	0.299179	0.273472	0.520679	0.353859	0.331765	0.301374	0.439888	0.382303	0.492065	0.576383	0.420526	0.251572	0.30607	0.29167	0.367197	0.411379	0.131956	0.29325	0.358456	0.336211
ASB9	-1.12012	-0.588989	-0.730559	-1.09676	-1.05618	-0.930808	-1.13793	-0.505	-1.10985	-0.831206	-1.13166	-0.485374	-0.861391	-0.786211	-0.604338	-0.677462	-0.709466	-0.891594	-0.952001	-1.06911	-0.664769	-0.667334	-0.91016	-0.77908	-0.550611	-0.778699	-0.637933	-0.824362
ASCC2	-0.139118	0.0439154	-0.111577	-0.121683	0.0527114	-0.257497	0.00704691	-0.1574	-0.218955	-0.188005	-0.113422	0.0624569	-0.196125	-0.0472485	-0.334885	-0.166622	-0.121299	-0.158476	-0.177188	-0.168867	-0.0670151	0.0821173	-0.00559709	-0.0496387	-0.145279	-0.0601782	-0.113185	-0.277127
ASCC3	0.0400509	0.0563261	0.081927	-0.250624	0.0329259	0.0122188	-0.13894	-0.00959779	-0.183473	-0.0667808	-0.0253612	0.0688918	-0.241446	0.0321607	-0.0986896	0.135755	-0.152046	-0.134439	0.0670922	-0.0465325	-0.0904822	-0.0165881	-0.197781	-0.151567	-0.0555616	-0.094868	-0.269606	-0.240588
ASCL1	-0.299979	-0.146994	-0.293463	-0.127912	-0.029624	-0.132242	-0.0294997	-0.152825	-0.176141	-0.138275	0.0370052	0.0776827	-0.0288412	-0.116007	-0.0151643	-0.167446	-0.13313	-0.0135349	-0.150799	0.0284953	-0.189715	-0.132428	-0.05931	-0.30465	-0.0957282	-0.170876	-0.294774	-0.0899568
ASCL2	0.301224	0.182729	0.342778	0.369344	0.342781	0.354355	0.380524	0.172145	0.317035	0.0374758	0.286054	0.256939	0.173696	0.360825	0.036175	0.287538	0.118068	0.227179	0.32705	0.179386	0.143779	0.0143316	0.0898545	0.107093	0.249839	-0.105405	0.2705	0.139855
ASCL4	0.396651	0.306644	0.132618	-0.01273	0.296256	0.438612	0.2803	0.610658	0.0709311	-0.0199735	0.50354	-0.0699392	0.180139	0.108531	0.214127	0.393771	0.283671	0.221415	0.20361	0.350194	0.566387	0.440703	0.387739	0.487198	0.43673	0.308942	0.163546	0.0460312
ASCL5	0.340745	0.454723	0.136218	0.110344	0.409815	-0.418637	0.0233398	0.32263	-0.276432	-0.501515	-0.112991	0.0573437	-0.181831	-0.173374	-0.135438	-0.0486934	-0.104748	-0.163335	-0.298792	0.153321	-0.331521	-0.106394	0.0192876	-0.115031	0.0119142	-0.301872	-0.315106	0.101495
ASF1A	-0.75948	-1.0243	-0.86311	-0.394537	-1.05523	-0.561995	-0.951541	-0.840616	-0.782904	-0.864124	-0.587633	-0.904094	-0.592199	-0.900121	-0.765452	-0.5974	-0.619156	-0.664471	-0.939707	-0.864463	-0.439022	-0.82809	-0.487901	-0.592953	-0.512898	-0.514497	-0.565044	-0.625602
ASF1B	-0.299665	-0.23718	-0.40861	-0.247304	-0.364193	-0.533289	-0.356357	-0.435685	-0.434597	-0.232883	-0.607835	-0.144948	-0.195581	-0.216446	-0.483013	-0.242214	-0.386548	-0.0403635	-0.25156	-0.173776	-0.67086	-0.132912	-0.466402	-0.381419	-0.386181	-0.292755	-0.558082	-0.676672
ASGR1	-0.144279	0.221291	0.113819	-0.154236	0.382722	0.176891	0.27748	0.375329	0.17686	0.086539	0.389331	0.0104203	0.112458	0.0991507	0.242077	0.48017	0.105616	0.103661	0.240843	0.0443805	-0.0773308	-0.101237	0.0517052	0.378513	0.122569	0.281941	0.035653	0.594691
ASGR2	-0.327441	-0.0335317	-0.540818	-0.398087	-0.558357	-0.191061	-0.418316	-0.490393	0.0123998	-0.0466986	-0.38433	-0.354965	0.0640391	-0.457931	-0.437394	-0.677239	-0.346011	-0.184023	-0.483718	-0.699785	-0.334435	-0.197766	-0.237406	-0.608788	-0.264146	-0.0570089	-0.316194	-0.124316
ASH1L	-0.212498	-0.212257	-0.266721	-0.146066	-0.202717	-0.192029	-0.284816	-0.178633	-0.0863925	-0.188809	-0.2852	-0.280662	-0.216435	-0.0168501	-0.245747	-0.311503	-0.262639	-0.216452	-0.294021	-0.347404	-0.276545	-0.138783	-0.278833	-0.214478	-0.240119	-0.260735	-0.257082	-0.142173
ASH2L	-0.877379	-1.05208	-0.827905	-1.00187	-0.990048	-1.06843	-1.53267	-1.05872	-1.27759	-1.09821	-0.845281	-1.13061	-0.990598	-0.960022	-0.941559	-0.692718	-0.752716	-0.637859	-0.856249	-0.831956	-0.882385	-0.784438	-0.868188	-0.824864	-0.806367	-0.687296	-0.790152	-0.586039
ASIC1	0.39727	0.246016	0.620216	0.496051	0.506738	0.450646	0.382505	0.386473	0.391022	0.357858	0.432861	0.280482	0.252505	0.365098	0.270338	0.385548	0.439114	0.084298	0.279128	0.323702	0.234675	0.268316	0.384392	0.388771	0.388989	0.308768	0.413943	0.400516
ASIC2	0.383847	0.0777748	0.266169	0.322061	0.383778	0.400618	-0.0977282	0.14499	0.268873	0.156395	0.302657	0.247984	0.257958	0.321011	-0.089615	0.147527	0.30729	0.074975	0.0967872	0.175869	0.131486	0.0839743	0.203091	0.390438	0.0905723	-0.126438	-0.0274567	0.0811364
ASIC3	0.549002	0.68893	0.451225	0.568726	0.575162	0.800503	0.50839	0.428324	0.81496	0.531093	0.788233	0.528894	0.449147	0.609965	0.755018	0.624395	0.71695	0.674896	0.789855	0.637887	0.780579	0.622768	0.687329	1.17867	0.639341	0.490516	0.574482	0.772842
ASIP	-0.362547	-0.180902	-0.223384	-0.20028	-0.276149	-0.378392	-0.225859	-0.330128	-0.230788	-0.403977	-0.32211	-0.282019	-0.134598	-0.0972953	-0.23076	-0.309797	-0.203945	-0.300159	-0.331851	-0.205163	0.0374027	0.0527581	0.0287992	-0.30908	-0.105086	-0.242905	-0.0606376	-0.0894387
ASL	-0.50842	-0.318015	-0.351254	-0.325395	-0.419879	-0.313286	-0.496216	-0.376834	-0.486343	-0.27105	-0.386245	-0.329331	-0.275224	-0.37719	-0.173622	-0.430757	-0.263918	-0.374711	-0.262184	-0.176037	-0.212495	-0.317957	-0.138952	-0.288297	-0.151923	-0.242595	-0.0942248	-0.251741
ASMTL	-0.411755	-0.375081	-0.540513	-0.358776	-0.504424	-0.336757	-0.177406	-0.200656	-0.269727	-0.188058	-0.241011	-0.231072	-0.286645	0.0686344	-0.103439	-0.20058	-0.111542	-0.0475963	-0.260593	-0.201622	-0.372819	-0.24987	-0.23181	-0.0797778	-0.17868	-0.495546	-0.282697	-0.46515
ASNS	-1.73106	-1.30794	-1.12906	-1.63894	-1.93166	-1.90608	-1.12278	-1.5923	-1.69474	-0.524016	-1.5977	-1.63447	-1.28028	-1.83936	-1.26687	-1.8655	-1.23512	-1.21732	-1.41389	-1.55212	-1.21375	-1.72218	-1.47869	-2.14806	-0.977748	-1.21074	-1.35928	-1.39255
ASNSD1	-0.734427	-0.472041	-0.420759	-0.602334	-0.615987	-0.387555	-0.474871	-0.499047	-0.467711	-0.317068	-0.527829	-0.415372	-0.408861	-0.188479	-0.352994	-0.276237	-0.359728	-0.282995	-0.349534	-0.236015	-0.652886	-0.346648	-0.366631	-0.307765	-0.323556	-0.417966	-0.497495	-0.490965
ASPA	0.183484	0.0101488	0.0682996	0.127974	0.458429	0.434198	0.181193	0.245988	0.259242	0.0150167	0.190616	0.153282	0.157416	0.276844	0.046895	0.115401	-0.0371032	0.057094	0.176275	0.114369	0.229245	0.152051	0.216114	-0.190496	0.18428	0.143696	-0.101329	0.0356164
ASPG	0.271839	0.155651	0.263925	0.288284	0.209396	0.370542	0.222545	0.370802	0.410241	0.240922	0.194537	0.264057	0.215674	0.277902	0.195734	0.279784	0.150369	0.182657	0.252113	0.282243	0.283764	0.224899	0.29686	0.334926	0.167205	0.0690708	0.168252	0.0989311
ASPH	-0.00189128	0.040787	0.0193325	0.0703468	0.0676137	0.0157756	-0.0548618	0.0334665	0.00162245	0.088102	-0.108641	-0.021051	-0.0824987	-0.105166	-0.101723	-0.0626027	-0.131049	-0.134391	-0.186221	-0.145906	-0.0749957	-0.104116	-0.107389	0.0556837	-0.0116701	-0.0418862	-0.0412331	-0.0785654
ASPM	-0.91289	-1.09818	-1.05616	-1.13184	-1.08133	-1.01058	-0.961118	-0.779044	-0.975754	-0.805681	-1.02132	-1.01782	-0.734024	-0.92355	-0.816214	-0.923076	-1.094	-0.923892	-0.953863	-0.917725	-0.843373	-0.840668	-1.14789	-1.26199	-0.737334	-0.894735	-0.911388	-1.10083
ASPN	0.423424	0.38529	0.658504	1.29385	0.748097	0.835698	0.708258	0.88087	0.884068	0.58036	0.933635	0.797984	0.723702	0.815487	0.672349	1.00019	0.975301	0.751711	0.789369	0.896464	1.25676	1.29508	1.19429	1.45368	1.0426	1.18267	1.18479	1.46174
ASPRV1	-0.653396	-0.387514	-0.362195	-0.611213	-0.376295	-0.451729	-0.379399	-0.298129	-0.34808	-0.257119	-0.115338	-0.323941	-0.308787	-0.315692	-0.10461	-0.281384	-0.328261	-0.225782	-0.372988	-0.105967	-0.41064	-0.0014124	-0.466167	-0.252172	-0.241386	-0.400941	-0.296862	-0.392327
ASRGL1	0.186852	0.159451	0.120786	-0.0825266	-0.124445	-0.00253911	0.256841	-0.0318903	0.182285	0.0820056	0.0793364	0.0465381	0.019841	-0.0408038	-0.044744	-0.0397064	-0.0496088	-0.278749	-0.201776	-0.222378	0.0372401	-0.00676512	-0.0155745	0.187964	-0.122711	-0.0573026	-0.0196501	0.108762
ASS1	-1.0329	-0.792924	-0.997944	-1.27557	-1.56726	-1.37197	-0.798205	-0.734588	-0.4936	-0.629614	-1.11161	-0.717585	-0.459221	-0.533085	-0.676785	-0.794867	-0.740796	-0.513836	-0.865435	-0.870069	-0.566833	-0.753809	-0.621541	-0.754767	-0.738429	-0.961283	-1.18971	-0.966094
ASTE1	-0.10214	-0.140784	0.0221948	0.0583737	-0.0663477	-0.238513	-0.0864037	-0.0420004	0.0347193	-0.109272	0.1418	-0.363765	-0.173339	-0.19365	-0.00171501	-0.111941	-0.202903	-0.0607851	-0.032251	0.112593	0.0136181	-0.0782726	-0.176847	-0.0215408	-0.0297477	0.02559	-0.206493	0.0484135
ASTN1	0.248115	0.120936	0.107873	0.163512	0.0439244	0.159627	0.389375	-0.0471263	0.174843	0.168065	0.16313	0.0577949	0.171051	0.204352	0.22169	0.300065	0.207478	0.0944027	0.2294	0.039408	0.208868	0.142276	0.168506	0.305673	0.132436	0.240849	0.200558	0.116968
ASTN2	0.114143	0.133582	0.109718	0.131779	0.0473456	0.119877	0.117095	0.00367308	0.0153996	0.0653589	0.102639	0.106161	0.0368966	-0.013982	-0.0209734	-0.0467403	0.0561882	-0.00407226	0.101687	-0.00242799	-0.0499002	0.0962315	0.00635295	0.085842	0.0331528	0.062049	0.00513477	0.0814571
ASUN	-0.2484	-0.242998	-0.211489	-0.447899	-0.30322	-0.567306	-0.990176	-0.364107	-0.723819	-0.39924	-0.420142	-0.327959	-0.421687	-0.382903	-0.268702	-0.328266	-0.372526	-0.241977	-0.38174	-0.0277647	-0.666532	-0.467903	-0.533898	-0.765252	-0.343309	-0.530932	-0.63989	-0.698118
ASXL1	-0.524335	-0.440732	-0.505344	-0.611283	-0.423263	-0.493327	-0.479389	-0.362265	-0.685981	-0.503024	-0.644519	-0.567834	-0.573392	-0.515028	-0.351675	-0.483494	-0.560499	-0.485359	-0.498483	-0.519282	-0.589427	-0.422948	-0.600796	-0.562619	-0.460772	-0.433051	-0.402561	-0.531525
ASXL2	0.361322	0.36746	0.300462	0.212552	0.346314	0.294387	0.266557	0.37306	0.14085	0.308953	0.258951	0.180773	0.250086	0.313061	0.268057	0.245251	0.285629	0.186752	0.259284	0.200203	0.295603	0.239024	0.265566	0.204036	0.203189	0.252062	0.152483	0.211596
ASXL3	-0.00618426	0.096012	0.0378059	-0.213236	0.169925	-0.0323732	0.0854337	-0.06545	0.011395	0.0565406	-0.0215644	0.0725136	-0.00508302	-0.066171	0.0978865	0.0445695	-0.0160919	0.0540959	0.022186	0.0554307	0.115475	0.128838	0.0150783	0.0195302	0.13028	0.138512	0.0940943	0.0711193
ASZ1	-0.877094	-0.63446	-0.793003	-0.795984	-0.509955	-0.645453	-0.210263	-0.413974	-0.841742	-0.182837	-0.553678	-0.411395	-0.403455	-0.581975	-0.437407	-0.230869	-0.451574	-0.305381	-0.408166	-0.13524	-0.0261772	-0.145521	-0.336895	-0.117455	-0.160823	0.026113	-0.110456	-0.126916
ATAD1	0.119034	0.389315	0.156403	0.185633	0.369642	0.240103	0.312782	0.0454893	0.508041	0.136223	0.371006	0.433056	0.0435371	0.0195549	0.180091	0.16533	-0.0241458	0.191337	0.365816	0.133156	0.0886331	0.115185	0.345334	0.144394	-0.0410017	0.126328	0.286513	0.305746
ATAD2	0.0868516	0.125586	0.0691227	0.0545214	0.0555296	0.000248443	0.0764962	0.0801257	0.111987	0.0987349	0.117449	0.0279153	0.0840936	0.0699822	0.0629417	0.0630326	0.038066	0.109682	0.168332	-0.00205033	0.130559	0.0276385	-0.0599889	0.0872773	0.0604406	-0.00149962	-0.0591237	0.0076535
ATAD3A	0.452361	0.188117	0.0621714	0.0212144	0.26257	0.331087	0.0704208	0.183023	0.398543	0.448154	0.386116	0.102595	0.38999	-0.217159	0.203357	0.100397	0.212625	0.0809384	0.0973051	0.111203	0.134198	0.206144	0.0271848	0.175764	0.160118	-0.0555689	0.11992	0.0482998
ATAD3B	0.188443	0.0810624	-0.0875739	-0.0095742	0.188986	0.132115	0.049191	-0.031172	0.083923	0.0744025	0.1482	0.0591841	0.0102448	0.186875	0.186	0.0958092	0.0254413	0.0484178	0.144558	0.0733004	0.302377	0.13425	0.257052	0.126956	-0.10726	0.203938	0.0428598	-0.0444463
ATAD5	0.660869	1.24899	0.552921	1.36344	-0.0139523	0.165554	2.78844	-0.383706	0.415935	1.28076	2.077	0.635	0.886528	1.18656	0.729035	2.00577	0.442075	1.83886	2.14466	1.86741	1.33734	1.46957	1.51714	2.15125	1.57032	2.15752	2.15757	0.646589
ATAT1	0.350499	0.217988	0.359461	0.467093	0.481081	0.50547	0.306744	0.305349	0.322943	0.254722	0.450502	0.294437	0.279157	0.163214	0.383478	0.171889	0.0915	0.267979	0.195531	0.404519	0.215779	0.0964897	0.385426	0.169586	0.185879	0.264326	0.142395	0.262488
ATCAY	-0.0254503	0.113364	-0.0923126	-0.178065	-0.0108909	-0.239151	-0.340277	-0.0516919	-0.234642	0.12905	-0.182425	-0.475819	-0.193749	-0.438701	-0.0236084	-0.156356	-0.475464	-0.769079	-0.244696	-0.113743	-0.00291128	0.0360116	-0.0041751	0.0832021	0.0270686	0.0436711	0.132451	-0.0229043
ATE1	0.341847	0.156107	0.344784	0.304466	0.173371	0.345145	0.336186	0.310086	0.460567	0.398321	0.353759	0.306472	0.467131	0.48343	0.215391	0.354047	0.432314	0.203122	0.145955	0.293544	0.163812	0.430158	0.31311	0.271929	0.40629	0.320724	0.37004	0.277684
ATF1	-0.219825	-0.220214	-0.38128	-0.266496	0.0188131	-0.299245	-0.462305	-0.364257	-0.519916	-0.339607	-0.568943	-0.265532	-0.357511	-0.375582	-0.0759109	-0.100047	-0.0987525	-0.0256308	0.00445922	-0.0773362	-0.306735	-0.188732	-0.184452	-0.354764	-0.186574	-0.146856	-0.268604	-0.135757
ATF2	0.239523	0.133501	0.13052	0.233543	0.183251	0.329245	0.0492292	0.0384461	0.392741	0.356295	0.35766	0.188559	0.186771	0.133362	0.20167	0.0561284	0.221562	0.0502184	0.13768	0.150034	0.215313	0.0829225	0.253939	0.212179	0.101189	0.215865	0.231964	0.211154
ATF4	-1.53494	-0.896943	-1.25925	-1.30567	-1.78715	-1.55575	-0.218921	-1.38262	-1.54541	-1.4657	-0.883193	-1.30652	-1.15203	-1.43915	-0.941243	-1.57723	-1.38459	-1.47584	-1.21927	-1.60696	-1.20615	-1.36659	-1.40089	-1.53182	-1.37393	-1.15775	-1.49432	-1.13116
ATF5	0.692874	0.633366	0.691	0.402793	0.939771	1.28684	0.700814	0.718078	0.949882	0.874796	0.672784	0.958762	0.955582	1.07701	0.538282	0.848539	0.668261	0.613819	0.77496	0.70665	0.846638	0.415687	0.843212	0.457577	0.383532	0.561118	0.197673	0.187877
ATF6	0.0316822	-0.208418	-0.352433	-0.13577	-0.00965863	-0.137913	-0.12736	-0.0620158	-0.0745633	-0.131871	-0.125165	-0.158765	-0.0561023	-0.112896	-0.0495788	-0.1781	-0.164094	-0.0431807	-0.220046	-0.180709	-0.19868	-0.123575	-0.226	-0.285823	-0.201583	-0.135954	-0.150935	-0.143274
ATF7	-0.0740709	-0.0497708	0.00270315	-0.0638886	0.0634248	-0.0224228	-0.0671972	-0.0264595	-0.0692953	-0.188957	-0.233483	-0.0933701	-0.079334	-0.110225	-0.0464414	-0.159696	-0.211437	-0.180682	-0.204115	-0.0631779	-0.0107586	-0.144513	-0.0626417	0.100189	-0.0911771	-0.14395	-0.00258177	-0.0371597
ATF7IP	-0.302502	-0.165472	-0.101382	-0.00921347	-0.201888	-0.034987	-0.108846	-0.232247	-0.145864	-0.0199986	-0.188478	-0.112103	0.0224414	-0.0810622	-0.0757116	-0.0350383	-0.175236	-0.201219	-0.269303	-0.272779	0.0905474	-0.075595	0.0375917	0.00933708	0.0242759	-0.0832995	-0.0148798	-0.0382864
ATF7IP2	-0.825398	-0.186112	-0.579227	-0.178354	-0.474664	-0.759623	-0.294869	-0.462566	-0.208644	-0.38781	-0.435428	-0.254276	-0.396261	-0.531277	-0.480755	-0.515512	-0.399326	-0.388147	-0.517558	-0.781386	-0.42618	-0.242271	-0.366814	-0.131536	-0.230217	-0.183101	-0.115251	-0.346926
ATG10	-0.261784	-0.254731	-0.305199	-0.219955	0.00516114	-0.200144	-0.232924	-0.360667	-0.114243	-0.0859303	-0.215401	-0.220781	-0.453833	0.00364645	-0.139322	-0.197038	-0.282489	-0.155818	-0.0342588	-0.043064	-0.232889	-0.06393	-0.181385	0.0128524	-0.219967	-0.287945	-0.0835903	-0.214538
ATG101	-0.172731	-0.0635424	-0.178995	-0.0840609	-0.243229	-0.0723502	-0.00750692	-0.194153	0.0068067	0.0717332	-0.110841	-0.227418	0.0867582	0.00768783	-0.0565169	-0.130002	-0.0226855	-0.018547	-0.0603043	-0.277265	-0.026313	-0.042123	-0.00594922	-0.107563	-0.0321152	0.0444424	-0.0605025	-0.116261
ATG12	-0.501062	-0.458321	-0.359774	-0.511156	-0.330881	-0.51114	-0.575425	-0.316638	-0.602135	-0.465657	-0.643543	-0.323832	-0.485915	-0.291445	-0.362601	-0.505103	-0.581426	-0.351664	-0.431999	-0.461882	-0.491791	-0.37261	-0.461369	-0.46182	-0.246016	-0.473743	-0.50824	-0.605905
ATG13	0.421646	0.230962	0.277864	0.249986	0.247961	0.239462	0.402324	0.321783	0.19052	0.224225	0.422878	0.262779	0.307101	0.375936	0.404485	0.490683	0.569796	0.407857	0.688868	0.66691	0.430598	0.361243	0.781618	0.777188	0.445824	0.443429	0.280554	0.336817
ATG14	-0.0789269	-0.211526	-0.0638696	0.0506037	-0.0505827	-0.0442895	0.160846	-0.251338	-0.0361829	0.0317152	0.250618	0.0502785	0.0276353	0.0862087	0.0970783	0.0998511	0.189128	0.0335536	0.053438	0.0950767	0.061942	0.0065326	0.141395	0.257905	0.192527	0.218425	0.051091	0.164589
ATG16L1	-0.0074719	-0.0999848	-0.146648	-0.292836	-0.177108	-0.0749668	-0.205218	-0.258535	-0.0391254	-0.0331601	-0.0269616	-0.0590302	-0.203839	0.192971	0.0297798	-0.104214	0.126674	0.16587	0.171312	0.0652746	-0.029429	0.0401895	-0.153555	-0.147813	0.0886868	0.147725	-0.00946519	-0.108005
ATG16L2	-0.0168914	-0.194477	-0.161846	-0.199819	0.0393938	-0.0818507	-0.145226	-0.242505	-0.114476	0.00558241	-0.027972	0.0208782	-0.089663	0.145968	-0.0425141	0.0595086	0.0897037	0.0856468	0.121287	0.064674	-0.0112186	0.0476227	0.0139218	0.0863602	0.0713181	0.0601524	-0.143649	-0.0734359
ATG2A	-0.51336	-0.45372	-0.441993	-0.391862	-0.473367	-0.571765	-0.332619	-0.388923	-0.440567	-0.412863	-0.244053	-0.487725	-0.437988	-0.603244	-0.553505	-0.709597	-0.437547	-0.606025	-0.473539	-0.529589	-0.573863	-0.840274	-0.544995	-0.355597	-0.816978	-0.493598	-0.65286	0.209854
ATG2B	-0.129697	-0.117291	-0.0180338	-0.0598849	-0.080031	0.0750449	-0.00311428	0.0764826	0.0424981	-0.0489028	-0.0577773	-0.113358	0.0173062	-0.0489663	0.0664431	-0.153021	-0.0355231	-0.045929	0.0533614	-0.0649726	0.06795	-0.0766589	-0.0811785	-0.091395	0.0620934	-0.0115641	0.0571777	0.0180344
ATG3	-1.29861	-1.09896	-1.06358	-0.938346	-1.57482	-1.35599	-0.803668	-1.44349	-0.902236	-0.795241	-0.814967	-0.759713	-1.05138	-1.06075	-1.21429	-0.935757	-1.29817	-0.903052	-1.18972	-1.12197	-1.17599	-1.49796	-1.27278	-0.984424	-1.18604	-1.25897	-1.18335	-0.961822
ATG4A	0.516035	0.328187	0.694182	0.54173	0.607356	0.632822	0.499373	0.594077	0.385024	0.349914	0.395326	0.290932	0.247975	0.452477	0.174035	0.460132	0.347927	0.169053	0.355958	0.558789	0.505848	0.248044	0.250096	0.277391	0.349195	0.347879	0.163045	0.296837
ATG4B	0.157238	0.209869	0.302154	0.30154	0.305912	0.227517	0.318275	0.176191	0.362799	0.310476	0.446181	0.267168	0.211334	-0.0781594	0.110556	0.00600334	0.0840286	0.0917975	0.0395154	-0.0153298	0.0996791	0.208051	0.225579	0.0541103	0.0806901	0.190515	0.146693	0.209562
ATG4C	0.100165	-0.322255	-0.397969	-0.570554	-0.236701	-0.270797	-0.348564	-0.239737	-0.447492	-0.366625	-0.412856	-0.291688	-0.112776	-0.588407	-0.150124	-0.0350784	-0.0608955	-0.161762	-0.291217	0.198156	-0.387228	0.0713761	-0.0783608	-0.363877	0.122736	-0.131305	-0.057319	0.175894
ATG4D	0.0805433	-0.16162	0.285491	0.127488	0.45791	0.29635	0.130382	-0.0123809	0.340858	0.132431	0.163584	0.0498753	0.0623855	0.0302484	-0.0525964	-0.0345371	0.0719996	-0.108786	0.0574128	0.227582	-0.117236	0.00864065	0.140992	0.0254253	-0.10906	-0.208441	0.112243	0.078491
ATG5	-0.962635	-0.826042	-0.737472	-0.776242	-0.840298	-0.808136	-0.769927	-0.662169	-0.848776	-0.848655	-1.04607	-0.9447	-0.862855	-0.755698	-0.890214	-1.01706	-0.954321	-1.04306	-1.15402	-0.958633	-0.838498	-0.885545	-0.828472	-0.925948	-0.88158	-0.950091	-1.02433	-0.901952
ATG9A	-0.18695	0.0525992	0.175737	0.63014	0.329306	0.454998	0.0787481	0.208155	0.318682	0.291678	0.264269	-0.167871	0.370065	0.0866186	-0.0123405	-0.0340959	0.123176	-0.0759657	0.343918	-0.0141538	-0.0773638	0.0493005	0.255348	0.320015	0.295438	0.0469399	0.0945987	0.173692
ATIC	-2.10684	-1.06754	-1.07019	-1.31272	-1.42986	-1.17509	-0.961039	-1.60184	-1.19081	-1.26145	-1.254	-1.08853	-1.08044	-1.49972	-1.27663	-1.07151	-1.66131	-1.24264	-1.40075	-1.28493	-0.830701	-0.932932	-1.11706	-1.55419	-0.896429	-0.892604	-0.860995	-0.970202
ATL1	-0.874366	-0.510527	-0.527999	-0.799079	-0.798706	-1.76746	-0.621459	-0.460506	-0.767758	-0.610637	-0.915716	-1.01434	-0.798442	-0.767253	-0.65377	-0.351479	-0.0983789	-0.126188	-0.332557	-0.767678	-0.353913	-0.176881	-0.580435	-0.816038	-0.26064	-0.316408	-0.600512	-0.338539
ATL2	-0.584323	-0.429015	-0.594161	-0.655065	-0.472272	-0.53325	-0.629169	-0.633813	-0.831841	-0.461144	-0.454602	-0.645694	-0.611275	-0.632892	-0.438872	-0.324495	-0.765728	-0.51307	-0.440484	-0.429661	-0.650882	-0.57749	-0.253279	-0.542474	-0.456775	-0.149461	-0.139112	-0.150595
ATL3	-1.17564	-0.798181	-0.774835	-1.00214	-1.07302	-1.33916	-0.785731	-1.01277	-1.23928	-0.753038	-0.959754	-0.924144	-0.918062	-1.13477	-1.02288	-0.950215	-1.19121	-1.12343	-0.785799	-0.967138	-0.839267	-1.03217	-1.08106	-1.28261	-0.945149	-1.0668	-0.939617	-0.706856
ATM	-1.23578	-1.10369	-1.33419	-1.40611	-1.4302	-1.49144	-1.33107	-1.10598	-1.06879	-1.00033	-1.29208	-1.09874	-1.00675	-0.803768	-0.902153	-1.3796	-1.11641	-0.863754	-1.01162	-1.27242	-1.22042	-0.811043	-1.10956	-1.26192	-0.798799	-0.892316	-0.977833	-1.00541
ATMIN	-1.03788	-0.718483	-0.691908	-0.936283	-0.991294	-0.911619	-0.798728	-0.692327	-0.803189	-0.896055	-0.536099	-0.739697	-0.546623	-0.485786	-0.264896	-0.675789	-0.576258	-0.54769	-0.634247	-0.624649	-0.606587	-0.419279	-0.621813	-0.189944	-0.535446	-0.382162	-0.551461	-0.361261
ATOH7	-0.361262	-0.413626	-0.429498	-0.306769	-0.203629	-0.216306	-0.25959	-0.267024	-0.467235	-0.189797	-0.433571	-0.212598	-0.458325	-0.325284	-0.0551106	-0.214643	0.0317985	-0.173307	-0.358259	-0.154996	-0.125344	-0.285831	-0.0224051	-0.238665	-0.154581	-0.0248132	-0.024488	-0.105176
ATOH8	0.247104	0.0925287	0.311092	0.186596	0.255761	0.104838	0.0736386	0.197989	0.136023	-0.20375	0.153084	0.0220912	0.164671	0.00840161	0.134401	0.547301	0.246209	0.232323	0.0328146	0.185958	-0.169802	-0.0192889	-0.0873701	-0.0444005	-0.176938	-0.0037344	-0.0140609	0.0425903
ATOX1	-0.20429	-0.287113	-0.231865	-0.119463	0.0623651	-0.422554	-0.272847	-0.269054	-0.225748	-0.387646	-0.444533	-0.292529	-0.271205	-0.365403	-0.212949	-0.0643162	-0.116816	-0.279655	-0.0567158	-0.208145	-0.22674	-0.222286	-0.42205	-0.0703798	-0.26128	-0.366676	-0.510951	-0.00445103
ATP10A	0.101388	0.260608	0.180969	0.132556	0.125648	0.164717	0.104973	0.0570887	0.247829	0.1938	0.268194	0.229927	0.176102	0.145342	0.152696	0.0510523	0.00659286	-0.0281483	0.0546464	-0.0894794	0.0925207	0.222249	0.0981812	0.320217	-0.00888053	-0.0154716	0.218761	0.108737
ATP10D	0.423114	0.176644	0.0323098	0.160482	0.260387	0.225772	0.483415	0.507683	0.516167	-0.196272	0.118434	0.0318641	0.0346742	0.32324	0.139916	0.162985	0.246624	0.282966	0.216526	0.106705	0.153305	0.0851839	0.172616	-0.0381774	0.0455171	-0.125481	0.0398109	0.178246
ATP11A	-0.740442	-0.201062	-0.429312	-0.509821	-0.79916	-0.692698	-0.520439	-0.628856	-0.530409	-0.368005	-0.641293	-0.413262	-0.0537721	-0.760775	-0.673235	-0.456485	-0.393851	-0.406187	-0.385761	-0.646244	-0.476986	-0.35209	-0.520214	-0.891495	-0.281588	-0.301786	-0.259687	-0.169016
ATP11A-AS1	-0.544705	-0.597679	-0.513288	-0.510593	-0.516771	-0.471435	-0.586373	-0.3212	-0.284647	-0.230925	-0.536102	-0.623547	-0.453024	-0.374143	-0.328313	-0.276264	-0.171394	-0.463233	-0.489889	-0.486284	-0.56251	-0.414485	-0.496135	-0.260667	-0.456461	-0.255293	-0.430371	-0.37555
ATP11AUN	-1.0753	-1.08482	-1.30227	-1.15802	-1.28724	-1.03718	-1.18276	-0.897784	-0.969968	-0.832563	-0.98681	-0.957417	-0.861215	-0.599649	-0.774055	-0.993531	-0.740104	-0.561557	-0.890536	-0.944081	-1.05922	-0.764536	-1.09286	-1.37504	-0.940178	-1.11616	-1.36254	-1.12959
ATP11B	-0.44858	-0.43197	-0.479015	-0.480288	-0.521513	-0.43388	-0.331553	-0.389072	-0.493856	-0.437978	-0.519956	-0.478016	-0.459018	-0.356247	-0.327916	-0.342225	-0.303716	-0.286479	-0.27802	-0.313877	-0.366868	-0.336589	-0.268134	-0.266523	-0.197958	-0.323645	-0.283932	-0.209867
ATP12A	0.405581	0.341674	0.465543	0.408949	0.238351	0.260093	0.415575	0.0887257	0.563019	0.497351	0.504669	0.216637	0.309164	-0.234839	0.417597	0.221511	0.329747	0.241871	0.308839	-0.166289	0.327372	0.536781	-0.0620729	0.298567	0.317273	0.222445	0.32542	0.263981
ATP13A1	-0.33186	-0.0378518	-0.0102962	-0.103925	-0.309258	0.096816	0.261292	-0.245592	-0.123643	-0.0899938	-0.123123	-0.0884902	-0.160141	-0.0345138	0.0455751	0.138228	0.147296	0.000123734	-0.0209103	-0.289659	0.0740241	-0.0219124	0.107597	0.0636923	-0.0617384	-0.136049	-0.14012	-0.320821
ATP13A2	0.44437	0.0467003	0.418705	0.148626	0.234077	0.358307	-0.0132757	-0.0120341	0.403754	-0.0636466	0.304613	0.114044	0.170489	0.258584	0.00448435	0.0736135	0.108927	-0.0723977	0.135309	0.0971392	0.394309	0.00756341	0.186372	0.198448	0.112539	0.0800505	0.235802	0.13947
ATP13A3	-1.23328	0.49874	-0.720148	-0.231906	-1.10417	-0.768964	0.836783	-0.423856	-1.0411	0.157441	0.395718	-0.75838	-0.650976	-0.493988	-0.331332	-0.209091	-0.658922	-0.275375	0.591975	-0.457555	-0.0367424	0.412871	1.16737	-0.270507	-0.0846601	-0.147281	0.145775	0.423461
ATP13A4	0.0880016	0.0801063	0.138825	0.0272506	0.133857	0.134292	0.18058	0.186442	0.176273	0.151075	0.249471	0.159883	0.119687	0.0631918	-0.010405	0.0546102	0.142597	0.124226	0.116375	0.134541	0.0130932	0.0197483	0.0722254	8.786e-06	-0.0473232	-0.0957049	0.0832161	0.0343422
ATP1A1	0.0735153	-0.169246	0.000978398	0.0545297	0.0288252	-0.249709	-0.214684	-0.128807	0.00503064	-0.311684	0.0278178	-0.175615	-0.131068	-0.0360049	0.0734011	-0.16253	0.102774	-0.0472497	-0.119093	-0.303343	-0.000234186	-0.105104	-0.0615897	-0.289207	-0.0588284	0.125507	0.0427306	0.104094
ATP1A2	0.670441	0.689925	0.711222	0.525334	0.597258	0.58911	0.628989	0.52354	0.665508	0.550459	0.752318	0.680046	0.542141	0.511928	0.48298	0.471112	0.411895	0.382523	0.482329	0.382842	0.486167	0.456706	0.714607	0.578275	0.405249	0.432428	0.43721	0.510803
ATP1A3	-0.151632	-0.0239269	-0.041714	-0.0775027	-0.0299213	-0.220991	-0.134063	0.00831451	-0.244288	-0.274896	-0.241137	-0.476186	-0.54796	-0.132041	-0.41773	-0.439705	-0.364931	-0.588553	-0.309468	-0.240869	-0.181222	-0.44827	-0.0641691	-0.179239	-0.0966736	-0.316512	-0.340604	-0.16613
ATP1A4	0.427107	0.093159	0.397639	0.315732	0.232948	0.368366	0.410476	0.335292	0.446888	0.405162	0.342005	0.474482	0.365009	0.545439	0.3525	0.239224	0.272895	0.387258	0.444066	0.325056	0.255077	0.327172	0.47237	0.329479	0.263865	0.391308	0.617244	0.26614
ATP1B1	-0.00468612	0.0552157	0.089698	0.0611097	0.155996	0.121906	0.103771	0.0612759	0.161688	0.0698114	0.192403	0.164833	0.0805957	0.194636	0.18244	0.131526	0.335294	0.131325	0.228235	0.0852061	0.329978	0.13916	0.297143	0.11778	0.152086	0.064197	0.189334	0.39336
ATP1B2	-1.39978	-1.44429	-1.39023	-1.38086	-1.51711	-1.39838	-1.42806	-1.08473	-1.10786	-1.07736	-1.25929	-1.15329	-1.11797	-0.787371	-1.01592	-1.46558	-1.04343	-1.17515	-1.40974	-1.54544	-1.3313	-0.955014	-1.23077	-1.46299	-1.10154	-1.29194	-1.2437	-0.986948
ATP1B3	-2.12215	-0.782913	-1.60803	-1.51532	-1.89653	-2.06241	-1.30409	-1.63138	-2.14778	-1.45424	-1.8505	-1.85117	-1.51184	-1.67082	-1.67919	-1.84254	-1.86985	-1.7659	-1.68552	-1.95982	-1.81191	-1.81584	-1.96661	-2.29917	-1.77972	-1.85212	-1.87044	-1.67307
ATP1B4	0.319059	0.229951	0.238325	0.234762	0.403052	0.277193	0.0965123	0.343902	0.143985	0.0835205	0.178467	0.251041	0.174096	0.0788298	0.196548	0.126457	-0.182037	0.0667899	0.0793707	-0.104791	0.0406863	0.0800904	-0.0880085	-0.162453	0.254161	0.203783	0.00413238	0.0444057
ATP23	-0.320634	-0.391541	-0.336802	-0.414051	-0.376746	-0.312024	-0.407841	-0.235114	-0.257737	-0.24795	-0.403182	-0.20637	-0.355978	-0.239823	-0.293858	-0.496541	-0.521146	-0.45754	-0.403926	-0.472478	-0.618631	-0.385557	-0.558216	-0.549513	-0.507703	-0.599154	-0.560817	-0.631185
ATP2A1	0.291582	0.0524836	0.321298	0.210219	0.383819	0.317902	0.212392	0.145054	0.183433	0.0508039	-0.0370509	-0.0974309	-0.0294374	0.0792499	-0.107273	-0.0498202	0.0327866	-0.0511601	0.198044	0.0889431	0.0936653	0.0873751	0.163006	-0.0452426	0.00791012	-0.0136359	0.0838004	0.168136
ATP2A2	3.28137	4.24704	4.18837	3.13136	3.50782	3.58077	2.91803	4.12095	3.74589	3.59183	3.64331	3.73383	3.88532	3.94206	4.6585	3.84176	4.30098	3.47943	3.79502	4.03959	3.93735	3.88988	4.35869	4.07404	3.8077	2.56257	2.84418	3.84191
ATP2A3	0.872488	1.0415	0.918216	0.79985	0.705253	1.15446	1.00486	0.871873	0.802509	1.29676	0.749203	1.16118	0.917145	1.06474	1.11326	1.21245	1.08848	1.09607	0.92736	0.961814	1.09503	1.04181	1.16746	0.924723	0.96111	0.89799	0.670498	0.701634
ATP2B1	-0.0480139	0.0324185	0.0984447	-0.103197	0.120514	-0.134964	-0.0177072	-0.0609254	0.125368	-0.122218	0.00270996	0.127268	-0.0189223	-0.130593	0.0448668	-0.125816	0.00973425	0.00362695	0.152528	0.0133324	0.00676796	-0.0254508	0.0812595	0.0500577	-0.224388	0.115091	-0.00930269	-0.00266594
ATP2B2	-0.481905	-0.347419	-0.291299	-0.412089	-0.284849	-0.265956	-0.420258	-0.417876	-0.690287	-0.389214	-0.493092	-0.32301	-0.538428	-0.233448	-0.171364	-0.508928	-0.297888	-0.375082	-0.254126	-0.253791	-0.498787	-0.251535	-0.436711	-0.476067	-0.388769	-0.464409	-0.437271	-0.430025
ATP2B3	0.31709	0.321827	0.24459	0.264563	0.192419	0.336595	0.346432	0.359115	0.31665	0.2858	0.202367	0.347267	0.340236	0.221301	0.298824	0.314293	0.2656	0.230001	0.206734	0.159351	0.218577	0.248623	0.222674	0.420906	0.107829	0.253175	0.201383	0.183403
ATP2C2	-0.0608628	0.0739018	-0.0171506	-0.128229	-0.0710128	0.0312308	0.172214	0.0255287	0.253467	0.0515593	0.0852445	0.0453021	0.18654	0.0844361	0.250485	0.0543746	0.327515	0.136489	0.292007	0.131814	0.0711171	0.0158309	-0.116486	-0.225048	0.264287	0.281526	0.235235	0.0481725
ATP4B	-0.0649742	0.0634815	0.0498889	0.0880462	0.0578916	-0.0215744	-0.130692	-0.0638754	-0.0439088	-0.327753	0.104268	-0.0795072	-0.220003	-0.0640528	0.0265285	-0.100417	-0.0915166	-0.0343749	0.0356257	-0.0296056	-0.14905	-0.0474678	0.00605534	0.253173	-0.10402	-0.118834	0.0889228	-0.374587
ATP5A1	0.907152	0.258856	0.652682	0.55824	0.312233	0.900868	0.241736	0.569079	1.22087	0.664808	1.18122	1.03968	1.42011	1.28237	1.6876	1.97206	1.70651	1.89321	1.93455	1.96246	1.37625	1.40496	1.83834	2.30665	1.47069	1.52362	1.54651	1.26609
ATP5C1	-0.141228	-0.126405	-0.245146	0.0132524	-0.149891	-0.213717	-0.0811617	-0.207863	-0.122382	-0.303389	0.0504916	-0.143356	-0.117115	-0.30129	-0.109334	0.112193	-0.000925499	0.00377775	-0.205726	-0.0717648	-0.26808	-0.0836151	-0.012237	0.0789435	-0.0174465	0.0851476	0.0841027	-0.167101
ATP5F1	-0.0995468	-0.117075	0.132769	0.135301	-0.119958	-0.0108687	-0.232348	-0.285095	0.0573335	-0.0823742	0.208056	0.0200436	0.147687	-0.187847	-0.0106056	0.449229	0.260786	0.318236	0.373535	0.416517	0.143278	0.117069	0.259132	0.640451	0.0582318	0.257841	0.218753	0.160147
ATP5G3	-0.229095	-0.372876	-0.0788145	-0.295139	-0.262563	-0.15799	-0.384954	-0.102668	-0.261594	-0.244494	0.006198	-0.297873	-0.175431	-0.12586	-0.0950147	0.0548479	-0.0934478	-0.0716348	-0.177301	-0.00995783	-0.0765806	-0.0910343	0.0481478	-0.140621	-0.00840492	-0.167441	-0.177482	-0.0581924
ATP5J	0.91902	0.750156	0.913522	0.892883	0.758243	0.902969	0.450991	0.705479	0.946238	0.76742	1.06022	0.859548	1.18131	0.677982	0.990069	1.22321	1.32627	1.07181	1.13283	1.30367	0.886744	1.00672	1.13781	1.47056	1.018	1.09333	0.963963	0.888804
ATP5L	-0.0607374	0.169886	0.168556	-0.0438394	-0.134056	0.0595324	-0.0848113	0.118853	0.401512	0.146659	0.318564	0.231331	0.254811	-0.0833584	0.25932	0.370513	0.420241	0.406179	0.390749	0.370498	0.297156	0.241346	0.509961	0.850541	0.0957073	0.369388	0.378683	0.602597
ATP5S	0.210023	0.279249	0.330957	0.311248	0.354238	0.00802718	0.0576218	-0.111419	0.411848	0.176993	0.0883638	0.0892936	-0.052674	0.119097	0.0715135	0.035277	0.101996	0.325421	0.20669	0.184065	0.0340599	0.0952644	0.236035	0.352988	-0.0846835	0.0630569	0.108368	0.0523745
ATP5SL	0.989528	0.596884	0.622229	0.908987	0.622617	0.951721	0.488066	0.267215	0.868142	0.85452	1.00165	0.574624	0.716405	0.214477	0.622514	0.796129	1.03979	0.785252	0.772652	0.641444	1.11748	0.795785	1.06739	1.21113	0.919587	0.986654	1.10373	0.682849
ATP6AP1L	-0.0635061	0.0657042	0.0517866	-0.149484	0.140571	0.0645328	-0.0377786	0.176266	0.0431262	-0.105734	-0.0023129	-0.0543358	0.030953	-0.14967	0.135616	-0.0338305	0.089146	0.0452226	0.109088	0.0899833	0.109205	-0.0989417	0.0339507	0.00820173	0.047399	0.169414	0.0556187	-0.0959209
ATP6AP2	-0.561118	-0.714163	-1.00783	-0.531624	-1.07954	-0.92725	-0.725972	-0.705263	-0.973816	-0.738952	-0.999281	-0.756304	-0.555248	-0.770129	-0.79045	-0.442554	-0.15934	-0.209788	-0.319277	-0.536916	-0.450435	-0.572886	-0.207721	-0.354738	-0.534876	-0.48078	-0.210724	-0.318082
ATP6V0A1	-0.679598	-0.301503	-0.127098	0.212254	-0.0855069	-0.370565	-0.0416312	0.00285414	-0.323176	-0.538131	0.0715206	-0.438638	-0.425472	-0.558614	-0.41617	-0.264971	-0.118214	-0.211129	-0.0237834	-0.150439	-0.277261	-0.328083	-0.508192	-0.180043	-0.342214	-0.169266	-0.0546479	-0.222493
ATP6V0A2	-0.271387	0.232386	-0.0410056	0.0728838	0.333361	0.109175	-0.0784621	-0.0166001	-0.111907	-0.0304517	-0.0109028	-0.0329974	0.0551278	-0.330649	-0.335917	-0.302736	0.0496741	0.326632	-0.0348872	-0.198054	-0.134474	-0.0872161	-0.0779719	-0.167076	-0.123432	0.044631	0.0412113	0.0660557
ATP6V0A4	-0.0362768	0.133666	0.0248613	0.362663	0.261752	-0.0808033	0.0630091	0.0206167	0.0253352	0.142053	0.0775847	-0.0814882	0.134185	-0.378062	0.324307	0.325056	-0.0965163	0.260049	0.130084	-0.154707	0.153549	-0.0697316	0.0862233	0.0280613	-0.175754	0.294576	-0.0251619	0.0644327
ATP6V0C	-0.175089	0.137952	-0.181159	0.245608	-0.234184	0.201678	0.366841	0.0421297	0.0408173	0.0533891	0.584786	0.121286	0.136264	-0.145141	-0.0256633	0.194242	-0.172453	-0.0424572	-0.166837	0.101561	-0.39296	0.128259	0.0357532	-0.0283271	0.0408089	0.0217354	0.130999	-0.187857
ATP6V0D2	-0.758013	-0.923699	-0.884947	-1.20991	-1.16214	-1.00004	-1.17641	-1.0319	-0.965167	-0.973053	-1.40566	-0.961037	-1.0848	-0.844091	-1.13089	-1.06404	-1.14248	-1.20643	-1.19962	-1.37053	-0.995061	-0.938256	-1.08144	-0.945538	-0.89085	-0.989515	-1.0652	-1.10312
ATP6V0E1	-0.161696	-0.0213301	-0.0922716	0.0503999	-0.0022205	-0.0155319	0.120065	-0.0204395	-0.119903	0.137554	0.0301629	-0.142475	0.0971842	-0.183754	0.0110717	-0.095325	0.123643	0.00557704	0.066637	-0.108687	0.0748294	0.0211944	0.180097	0.0500987	0.0103693	-0.0294311	0.0192934	0.235795
ATP6V1A	0.124858	0.12769	0.126376	0.175339	0.0567511	0.374812	0.378393	0.133472	0.160943	0.144255	-0.112504	0.244891	0.198082	0.370984	0.0918834	0.124131	0.284054	0.118584	0.216182	-0.0449732	0.206992	0.103854	0.114788	0.0973534	0.153329	0.213806	0.1283	0.13175
ATP6V1B1	-0.223613	0.0111933	0.137552	0.0738105	0.23634	0.242786	0.205429	0.255335	-0.0373052	0.189164	0.315744	0.164281	0.107922	0.303321	0.282088	0.312758	0.227045	0.236122	0.15705	0.279353	0.361234	0.490068	0.388521	0.423265	0.211959	0.496667	0.10234	0.198565
ATP6V1B2	-1.04307	-0.513045	-0.353352	-0.35332	-0.91849	-0.665131	-0.238919	-0.433596	-0.870841	-0.029493	-0.818934	-0.71022	-0.656046	-0.613673	-0.437061	-0.0287212	-0.33857	-0.0986709	0.139269	-0.284476	-0.314871	-0.270603	-0.116843	-0.124633	-0.16953	-0.0659433	0.190211	-0.173555
ATP6V1D	0.188963	-0.0839929	-0.214487	0.294371	-0.408181	-0.042998	-0.00990396	-0.0727175	0.136038	-0.0180548	0.455288	0.247571	0.419454	0.288924	0.426267	0.70043	0.874385	0.868642	0.730383	0.779247	0.798072	0.682294	0.9549	0.922797	0.725536	0.796032	0.577492	1.04449
ATP6V1E1	0.18714	-0.0851781	0.0387002	0.315769	-0.147309	0.182842	0.372971	0.378192	0.419654	0.219521	0.451896	0.214605	0.470939	0.418963	0.573933	0.836659	0.483735	0.597308	0.688712	0.587141	0.889793	0.854378	1.02629	1.31255	0.963236	1.06405	0.728286	0.619448
ATP6V1F	-0.227576	0.0907671	0.0311756	0.042233	-0.178181	0.195483	0.709785	-0.0900463	0.129742	0.0866204	0.137575	-0.250918	-0.039014	-0.0333762	0.0153852	0.244797	-0.0362608	0.0958008	0.234892	0.0294966	-0.140993	-0.192496	0.020114	0.075171	-0.0533539	-0.15863	0.00842028	-0.0178159
ATP6V1G1	-0.246087	-0.0635939	-0.079639	-0.145467	-0.205428	-0.122564	-0.30804	-0.388486	-0.185799	-0.209671	-0.237955	-0.25048	-0.0421108	-0.342773	-0.276887	-0.160446	-0.147717	-0.326368	-0.392103	-0.688207	-0.137164	-0.306708	-0.104195	-0.342435	-0.0915452	-0.208122	-0.12533	-0.2787
ATP6V1G3	0.231702	0.094881	0.298795	0.278638	0.424845	0.316509	0.120409	0.246381	0.0517841	-0.0358426	0.171037	0.151951	0.0558401	0.150248	0.142373	0.191547	-0.162748	-0.0103256	0.146895	0.0466511	0.0294998	0.039951	0.00297293	0.325395	-0.0601361	-0.00204939	0.244952	-0.172082
ATP6V1H	-0.451619	-0.699768	-0.637229	-0.299382	-0.680293	-0.533794	-0.706857	-0.426205	-0.324478	-0.404925	-0.331434	-0.32699	-0.10377	-0.367426	-0.353853	-0.00129137	0.0836837	-0.0813916	-0.0958574	-0.0370201	-0.0525031	-0.161188	-0.0675479	0.044683	0.0116157	-0.177995	-0.309749	0.240881
ATP7A	-0.447985	-0.367943	-0.401749	-0.606308	-0.318163	-0.466127	-0.429822	-0.341383	-0.436395	-0.361701	-0.462074	-0.288675	-0.289805	-0.406437	-0.313377	-0.483295	-0.435301	-0.289193	-0.382795	-0.430389	-0.159716	-0.179144	-0.196404	-0.420358	-0.189562	-0.23826	-0.0941701	-0.147299
ATP7B	0.381778	0.12258	0.223782	-0.00124125	0.300538	0.302985	0.427417	0.251668	0.209558	0.195873	0.327016	0.150141	0.193805	0.260434	0.150104	0.199691	0.116734	0.298921	0.137811	0.00185707	0.0895818	0.172497	0.150466	0.312183	0.141865	0.128801	0.142279	0.118882
ATP8A1	-0.103262	0.0386044	-0.0505404	-0.0979788	0.0212603	0.00257693	-0.112809	-0.0574184	-0.262079	-0.00173821	-0.0835748	0.0340866	-0.134151	-0.0364772	-0.100284	-0.0931564	-0.115079	0.00358015	-0.18966	-0.0760891	-0.0942202	-0.022026	-0.146447	-0.0967755	0.0653359	0.0110803	-0.102403	-0.143666
ATP8A2	-0.0939492	-0.0625991	0.0293746	-0.235843	-0.0444721	-0.0211187	-0.0612305	-0.0585613	-0.0817933	-0.0516334	0.0168645	-0.00379042	-0.100718	0.0249068	-0.0767056	-0.0312928	-0.0759944	-0.097042	-0.258138	-0.00397447	0.0014032	0.0793369	-0.189706	-0.161648	0.0362026	-0.035981	-0.0844121	-0.0275243
ATP8B1	-0.832565	-0.645079	-0.588234	-0.646534	-0.799995	-0.823585	-0.554053	-0.737323	-0.874007	-0.407959	-0.874471	-0.710507	-0.596187	-0.724174	-0.46772	-0.546805	-0.506212	-0.410234	-0.621818	-0.741941	-0.677615	-0.544026	-0.524609	-0.65326	-0.623999	-0.386252	-0.388358	-0.482989
ATP8B2	-0.0865261	0.0614476	-0.252933	-0.180247	-0.243285	-0.248534	-0.272037	-0.0941217	-0.275063	-0.171123	-0.521012	-0.472836	-0.317002	-0.217746	-0.0154573	-0.117175	-0.0362623	-0.116392	-0.0333424	-0.405188	-0.1296	0.186813	0.332866	0.160369	-0.151659	-0.16736	0.222805	0.121072
ATP8B3	0.087463	-0.0113401	0.087233	-0.0180276	0.344459	-0.00940594	0.202349	0.0482338	0.105161	0.0186624	0.0226811	-0.159641	-0.115015	-0.289936	0.144126	0.0700955	-0.000546402	0.0713303	0.256871	-0.0140825	0.0352388	0.0843472	0.16595	0.116327	0.0119269	-0.0751978	0.298468	-0.0231992
ATP8B4	0.161724	0.101688	0.180062	0.00270454	0.062628	0.109535	0.0551471	0.225458	0.213105	-0.162719	0.163272	0.0293761	-0.0293249	-0.0768535	0.0593882	-0.0983019	0.0959626	-0.0124202	-0.100156	0.000461755	-0.00569825	0.025705	0.101152	-0.000524761	0.0128555	-0.0429239	-0.0547883	0.0142849
ATP9A	0.282611	0.152829	0.392839	0.370386	0.249099	0.443328	0.157031	0.354765	0.0492035	0.175932	0.126182	0.171841	0.0818822	0.072494	0.0234999	0.17973	0.165368	0.203162	-0.00962019	0.0875399	0.18672	0.11326	0.285847	-0.0191758	0.186808	-0.0500976	-0.0196561	0.112743
ATP9B	0.248055	0.213767	0.194036	0.359636	0.208284	0.248072	0.29036	0.299666	0.201274	0.212617	0.186173	0.277746	0.234594	0.284985	0.254198	0.221828	0.0790221	0.17997	0.211262	0.230766	0.225355	0.241985	0.347252	0.15138	0.236422	0.32853	0.29605	0.26272
ATPIF1	-0.206236	-0.504186	-0.602464	-0.187806	-0.319302	-0.477689	-0.46515	-0.450968	-0.288456	-0.272616	-0.137241	0.0248466	-0.23498	-0.132524	-0.191841	-0.184979	-0.108539	-0.227214	-0.219732	0.030842	-0.0820706	-0.22244	-0.200696	0.0302866	-0.0925605	-0.0787996	0.014881	0.105137
ATR	-0.517135	-0.486209	-0.388492	-0.43208	-0.403201	-0.47267	-0.452864	-0.267952	-0.319674	-0.326404	-0.399751	-0.320815	-0.382601	-0.335723	-0.322542	-0.50526	-0.494342	-0.335132	-0.502303	-0.418579	-0.443195	-0.408957	-0.422272	-0.588995	-0.408404	-0.527912	-0.586552	-0.433685
ATRAID	-0.224412	-0.371598	-0.263406	-0.300249	-0.239569	-0.207737	-0.266459	0.0438931	-0.414419	-0.00381845	-0.264809	-0.273054	-0.335915	-0.308153	-0.264255	-0.160263	-0.0026301	-0.198628	-0.0983886	-0.121746	-0.390292	-0.0964568	-0.335445	-0.306193	-0.286267	-0.274515	-0.111185	-0.278827
ATRIP	0.285488	0.455742	0.38194	0.68778	0.433854	0.574217	0.302809	0.489085	0.300052	0.359396	0.419721	0.309553	0.218007	0.155642	0.105966	0.134989	0.227903	0.337243	0.206452	0.034744	0.105467	0.167015	0.186079	0.350364	0.0938532	0.136536	0.33236	0.21178
ATRN	-0.301583	-0.271026	-0.195504	-0.385558	-0.509973	-0.180184	-0.424397	-0.658341	-0.534339	-0.153902	-0.238748	-0.384265	-0.127352	-0.166205	-0.175098	-0.223523	-0.252477	-0.0876298	0.0329174	-0.134239	-0.408012	-0.183554	-0.28813	-0.305621	-0.368168	-0.417258	-0.476445	-0.0837634
ATRNL1	-0.11449	-0.0284729	-0.143421	-0.0575684	0.120262	-0.180395	-0.293937	-0.0976167	-0.0919962	-0.00420735	-0.0775051	-0.0293327	0.265162	-0.0910098	-0.169817	-0.0618508	0.0278279	-0.0435449	-0.209367	-0.0375817	-0.209974	-0.00103544	-0.0963336	-0.0315952	0.00768664	0.037078	-0.0233713	-0.192558
ATRX	-0.676341	-0.41311	-0.509139	-0.527839	-0.608934	-0.156042	-0.474588	-0.588815	-0.194239	-0.477446	-0.53613	-0.38217	-0.261714	-0.323432	-0.336454	-0.11381	-0.261643	-0.209825	-0.47297	-0.273391	-0.417926	-0.248385	-0.552641	-0.21024	-0.329113	-0.279614	-0.425892	-0.6026
ATXN1	-0.450658	-0.286592	-0.198302	-0.24395	-0.35958	-0.403476	-0.227811	-0.339799	-0.328838	-0.22388	-0.297912	-0.309162	-0.254026	-0.204683	-0.145011	-0.235241	-0.237031	-0.188595	-0.262265	-0.325809	-0.378845	-0.276229	-0.170903	-0.110601	-0.180364	-0.258634	-0.0599406	-0.0201775
ATXN10	-0.253948	-0.279294	-0.301484	-0.176718	-0.450334	-0.293724	-0.0619399	-0.254505	-0.155966	-0.21576	-0.000505968	0.0515861	-0.00901504	0.0277081	-0.0840447	-0.00338884	-0.104161	-0.0553239	-0.0325036	-0.0419735	-0.148104	0.0757939	-0.0518431	0.0510099	-0.0478989	0.00559247	0.14821	-0.0729042
ATXN2	-0.274534	-0.337489	-0.40606	-0.344673	-0.401086	-0.475386	-0.349875	-0.301551	-0.40617	-0.361829	-0.380399	-0.341127	-0.432727	-0.233419	-0.302973	-0.392534	-0.297436	-0.339375	-0.499821	-0.464314	-0.191868	-0.207937	-0.308702	-0.50155	-0.400655	-0.280397	-0.323571	-0.300909
ATXN2L	0.207151	0.137757	0.103402	0.176194	0.291228	0.215038	-0.0476821	-0.0682481	0.0828623	-0.0780208	-0.207797	-0.0137918	0.0955076	0.0440462	0.291122	0.0920926	0.0285914	0.11869	0.132455	0.0971394	-0.205291	-0.000595112	-0.0896508	0.0809491	0.0643237	0.120227	-0.0194209	0.0642342
ATXN3	-1.53078	-1.04717	-1.20876	-0.910817	-1.047	-1.30136	-1.2349	-0.934692	-0.89118	-1.07952	-1.52114	-1.10978	-1.14155	-0.840113	-0.704488	-1.23015	-1.01059	-0.998643	-1.01819	-1.24578	-1.30271	-0.6878	-1.00947	-1.06638	-0.926166	-0.940887	-0.919831	-1.09865
ATXN3L	-0.359417	-0.251538	-0.178658	-0.118105	0.0185973	-0.00863111	-0.0208136	0.0463227	-0.0269673	-0.0598252	-0.095448	-0.0368071	-0.0569641	-0.0498995	0.0209264	-0.231567	0.0824607	-0.0174499	0.0141982	-0.157739	-0.0413877	-0.00453027	-0.00348142	-0.345161	-0.0416749	-0.0571358	0.107284	0.00856408
ATXN7	-0.269948	-0.185635	-0.359693	-0.216297	-0.162394	-0.260865	-0.130296	-0.31729	-0.283733	0.000157595	-0.18998	-0.319066	-0.270644	-0.111623	-0.169799	-0.132337	-0.0972087	-0.0673471	-0.196566	-0.235931	-0.111674	-0.178001	-0.28072	-0.169935	-0.100136	-0.29377	-0.0311618	-0.154391
ATXN7L1	0.284234	0.305671	0.216305	0.299495	0.240608	0.245194	0.266866	0.29033	0.369948	0.172342	0.328898	0.32831	0.34903	0.219468	0.202805	0.181876	0.0695191	0.123467	0.151603	0.218682	0.181967	0.150331	0.245532	0.27251	0.240632	0.179039	0.0972158	0.268983
ATXN7L2	0.0303646	-0.0954597	-0.00182775	0.0460908	0.120199	-0.157543	-0.111214	-0.124699	0.0694003	0.00454031	-0.028765	0.204959	0.136612	-0.0345867	0.0173327	-0.117276	-0.00391111	-0.0831386	0.0319902	-0.00861979	-0.00318622	0.138414	0.0835122	0.217216	-0.00497144	-0.0263209	0.0248036	0.0391377
AUH	-0.361474	-0.346094	-0.275823	-0.316521	-0.320519	-0.206481	-0.304058	-0.221442	-0.17081	-0.244593	-0.279826	-0.197952	-0.118074	-0.0589148	-0.310855	-0.180214	-0.241372	-0.260651	-0.225545	-0.266791	-0.320792	-0.210336	-0.323177	-0.394405	-0.31886	-0.269078	-0.344157	-0.257382
AUNIP	-1.2821	-1.1181	-1.26309	-1.06387	-1.19856	-1.0633	-1.16617	-0.953227	-1.29236	-1.02369	-1.24813	-1.06717	-1.13912	-0.874922	-1.02053	-1.23077	-1.0651	-1.12639	-1.31036	-1.19459	-1.31815	-1.183	-1.34561	-1.47929	-1.14719	-1.25751	-1.55862	-1.18844
AURKAIP1	-0.186927	-0.269729	-0.164974	-0.109441	0.0380124	0.00884238	-0.166527	-0.0833639	-0.26036	-0.222247	-0.0371273	0.00142598	0.00258957	-0.142498	-0.16096	-0.0881265	-0.138356	-0.121835	-0.104043	-0.0490794	0.0782407	-0.0465092	-0.00420257	0.433332	-0.130126	-0.0239338	-0.186361	0.011405
AURKB	-0.0889899	-0.203809	0.224147	-0.00957339	0.143705	-0.0995655	-0.245748	-0.157073	-0.366817	-0.348228	-0.411431	-0.479493	-0.460119	-0.446379	-0.170396	-0.325479	-0.373667	-0.364691	-0.12111	-0.289589	-0.186873	-0.371997	-0.562609	-0.379425	-0.231902	-0.354478	-0.573362	-0.396776
AURKC	0.0857171	0.0669859	0.100623	0.0847617	-0.0145882	-0.0341098	-0.018793	0.0899692	0.0490201	0.108886	0.0317288	0.210673	-0.0684696	-0.179855	-0.00732871	-0.0234474	0.0599869	0.0629241	-0.0443684	0.128978	0.0440162	0.0214837	-0.16314	0.102193	0.0907502	0.114658	0.0301049	0.00819844
AUTS2	0.0493144	-0.044854	-0.0398994	0.0833642	0.0681027	0.00714655	-0.0356479	0.0424641	0.0106541	-0.0752399	-0.0469913	-0.0378469	-0.0602242	-0.0809089	0.018362	0.0214533	0.0318351	0.0948422	0.0991484	0.0498554	0.0890476	0.0798331	0.155944	0.125888	0.0302609	0.0689274	0.166758	0.0714296
AVEN	-0.167707	-0.424813	-0.204501	0.0205324	-0.50612	-0.392522	0.0645176	-0.316663	-0.293327	-0.307497	0.246965	-0.138055	-0.000554545	-0.303901	-0.107541	-0.0947646	-0.0582277	-0.247342	0.0214515	0.0414675	0.000888314	-0.0294056	0.0998234	-0.106506	-0.19075	-0.00930663	-0.154264	-0.211919
AVIL	0.624789	0.0335111	0.485927	0.126657	0.445732	0.444665	0.0589076	0.353147	0.437601	0.317042	0.438741	0.366417	0.345606	0.132614	0.296689	0.0595498	0.319025	0.34547	0.456826	0.396564	0.358274	0.124367	0.465082	0.703575	0.297427	0.239749	0.578456	0.427138
AVL9	-0.383532	-0.312594	-0.267435	-0.346366	-0.492274	-0.258123	-0.428982	-0.185789	-0.341371	-0.476071	-0.377993	-0.236646	-0.378543	-0.35834	-0.360549	-0.374584	-0.360681	-0.378448	-0.484363	-0.462557	-0.339933	-0.207796	-0.454306	-0.440469	-0.289478	-0.326903	-0.403123	-0.33362
AVPI1	0.197086	0.0203523	0.142527	-0.131111	0.107338	0.113913	0.211603	0.0914897	-0.208362	0.0963916	0.0827058	0.0368309	-0.0773558	-0.0383649	0.0568646	0.059754	-0.198204	0.0619373	-0.0351869	-0.167997	0.109209	0.0369759	0.0319236	0.0100339	0.0326934	0.0573145	-0.332542	-0.280834
AVPR1A	-0.0240351	-0.0107824	-0.0557294	-0.164347	-0.122584	-0.128317	-0.0285594	-0.058349	-0.341186	0.0152135	-0.169701	-0.0174601	-0.0120203	-0.0891525	0.0337282	-0.0180143	-0.0115812	-0.009927	0.083162	-0.131722	0.128713	0.161065	-0.0338663	0.26518	0.059169	0.0281778	0.116739	0.0570522
AVPR2	0.256796	0.329652	0.254307	0.345303	0.19024	0.269209	0.35347	0.122984	0.228231	-0.0152365	0.374531	0.190509	0.180379	0.0803193	0.228687	0.340783	0.422718	0.454307	0.135752	0.28616	0.254646	0.279053	0.308941	0.338047	0.0412356	0.377447	0.398825	0.460177
AWAT2	-0.274381	0.0306863	0.107714	0.0165977	0.0530028	-0.0568073	-0.0693379	-0.135816	-0.168781	-0.205151	-0.389655	-0.310721	-0.112854	-0.221402	-0.223446	-0.233921	-0.168474	-0.230511	-0.383021	-0.319308	-0.153337	-0.245438	-0.438135	-0.331465	-0.167544	-0.304864	-0.323536	-0.391742
AXDND1	0.398076	-0.0911676	0.298139	0.508947	0.213508	0.202893	0.256854	-0.00377187	0.351999	0.187284	0.34357	0.218631	0.0287359	0.219831	0.0532496	0.518245	0.365134	0.276346	0.338043	0.413721	0.119566	0.371378	-0.183389	0.387322	0.118098	0.285037	0.182959	0.104043
AXIN1	-0.320275	-0.255917	-0.272151	-0.262268	-0.249581	-0.159673	-0.157431	-0.293732	-0.39704	-0.355497	-0.25592	-0.247126	-0.254654	-0.343458	-0.275585	-0.191537	-0.296205	-0.160631	-0.278264	-0.294154	-0.303456	-0.263937	-0.392921	-0.233812	-0.263904	-0.231592	-0.410247	-0.359009
AXIN2	0.124584	0.0413084	0.119997	0.077929	0.0686042	0.0632134	0.0726027	0.0361991	0.0325274	-0.0306386	-0.132844	0.0506097	-0.151135	0.00450432	-0.158365	0.0398737	-0.210585	-0.34203	0.0314175	-0.0871646	-0.0329148	-0.11603	0.0177893	0.158511	-0.0463183	-0.0522628	0.0208781	-0.18465
AZI2	0.155715	0.0389237	-0.0122546	-0.0498707	0.0946066	-0.00203493	0.0341641	0.00252883	0.0290727	0.0993995	0.0592764	0.111024	-0.0344915	0.00612779	-0.0674869	0.102768	-0.0402974	-0.014124	-0.108369	0.0426221	-0.0745049	0.102798	-0.1286	0.320012	0.00656568	-0.0472234	0.0962381	-0.0715545
AZIN1	-0.096278	0.00778772	-0.22831	-0.173948	0.0656441	-0.355989	-0.103261	-0.190919	-0.30104	-0.192609	-0.382302	0.0950909	-0.163458	0.101851	-0.0921545	-0.0354431	-0.176922	0.0187072	-0.135686	-0.343469	-0.195649	-0.0537106	-0.0817022	0.094262	-0.148938	-0.103728	-0.0166324	-0.141946
AZIN2	0.262016	0.00280131	0.144219	0.409544	0.0856001	0.300893	0.25867	0.303236	0.214843	0.239877	0.32846	0.312345	0.223391	0.184231	0.168869	0.238002	0.573914	0.384059	0.266285	0.188762	0.366638	0.231095	0.345293	0.436112	0.173844	0.247219	0.153563	0.296623
B3GALNT1	0.0202839	-0.0216915	-0.0100138	-0.0309586	-0.168002	-0.045572	-0.0611009	0.302864	-0.00748327	-0.00894884	0.193254	0.0517395	0.0570465	0.32041	0.307927	0.169408	0.496801	0.423818	0.181027	0.138902	0.391345	0.263356	0.620096	0.220103	-0.0588751	0.160033	0.476022	0.282562
B3GALNT2	0.276505	0.472276	0.477379	0.280217	0.506983	0.230019	0.291575	0.257398	0.369498	0.129969	0.232897	0.185883	0.141125	0.152774	0.0576685	0.337185	0.0493765	0.238295	0.236923	0.277907	0.0915611	0.120746	-0.0108551	-0.0987424	0.0165321	0.282844	0.119285	0.158701
B3GALT1	-0.565093	0.096369	-0.282964	-0.126274	-0.452417	-0.37075	-0.0447467	-0.193031	-0.590747	-0.179991	-0.0190372	-0.278732	0.0454296	-0.288085	-0.29608	-0.271208	-0.165392	-0.0033835	-0.109854	-0.304424	-0.198337	0.0700661	-0.214788	-0.266383	-0.174343	-0.0841354	-0.073871	-0.0534751
B3GALT2	-0.118862	0.0681537	0.0488004	0.131673	-0.00508619	-0.209251	0.179811	0.0140303	0.061067	0.0473599	-0.0385989	0.0741343	-0.0857949	-0.127059	0.166724	-0.0520547	0.258091	0.174921	0.0286548	0.00750501	-0.142425	-0.0105225	-0.0666438	0.318187	0.00665591	-0.0864395	-0.0577723	0.158067
B3GALT5	-0.0564767	-0.120612	-0.177407	0.0370879	0.128246	-0.0661288	0.237372	0.172246	0.0489173	-0.241098	0.135017	-0.04185	-0.101909	-0.149962	0.118675	0.175855	0.170439	0.0327113	0.109593	0.135056	0.100552	-0.0648921	0.119782	0.0251161	-0.0716983	0.152874	0.367759	0.361455
B3GAT3	0.166393	0.115732	0.0432716	0.308237	0.0570879	0.209709	0.412415	-0.114903	0.109925	0.352312	0.266523	0.324478	0.224487	-0.029412	0.303231	0.206834	0.355098	0.131022	0.142458	0.187502	0.148494	0.135841	0.199059	0.429021	0.0341214	0.177536	-0.0216182	0.208278
B3GLCT	0.942948	0.739697	0.578975	0.355746	0.505596	0.824839	0.233653	0.189532	0.5149	0.541889	0.744887	0.729968	0.847988	0.404645	0.347901	0.408379	0.267495	0.394496	0.522411	0.439917	0.552056	0.322854	0.181192	0.567235	0.298362	0.402511	0.414465	0.226228
B3GNT2	-0.103573	0.145364	0.0286254	0.097472	-0.0327467	-0.103754	0.00730397	-0.0641444	0.107413	0.390094	0.327879	0.259543	0.110304	0.264197	0.285498	-0.0523284	0.0331474	-0.0299092	0.120897	-0.0967503	-0.0880284	-0.0535405	0.0245089	0.0511394	0.0580669	0.214592	0.253426	0.209967
B3GNT4	0.121309	0.019716	-0.0358697	0.122491	0.0699211	-0.072951	0.066325	0.149969	0.138195	-0.140911	-0.0199543	0.113732	-0.0787382	-0.179361	0.0840863	0.0592775	-0.0201815	0.0391024	0.102648	0.0217208	0.153256	-0.0468757	0.0466299	0.0674912	-0.029323	0.0224688	-0.0283958	-0.0797783
B3GNT5	-0.254535	-0.255154	-0.36218	-0.27777	-0.157549	-0.310372	-0.432678	-0.240498	-0.338614	-0.167291	-0.222721	-0.115987	-0.263151	-0.211557	-0.246762	-0.289756	-0.244507	-0.369983	-0.303314	-0.175025	-0.25057	-0.161583	-0.199414	-0.146067	-0.182382	-0.26126	-0.219421	-0.329636
B3GNT9	-0.686158	-0.660998	-0.74561	-0.531312	-0.635727	-0.59656	-0.627991	-0.486852	-0.470844	-0.590638	-0.704159	-0.696333	-0.604357	-0.355922	-0.407574	-0.633982	-0.587182	-0.631964	-0.822113	-0.852591	-0.705476	-0.413586	-0.420309	-0.343231	-0.435867	-0.404884	-0.399846	-0.396545
B3GNTL1	-0.0800272	-0.0375286	-0.255154	-0.306729	-0.271382	-0.23724	-0.292768	-0.148711	-0.278477	-0.288215	-0.443377	-0.163179	-0.0996002	-0.257118	-0.119203	-0.0511053	-0.225484	-0.179053	-0.11095	-0.0347357	-0.251949	-0.0915096	-0.164245	-0.236375	-0.175596	-0.146842	-0.236199	-0.286352
B4GALNT2	0.605047	0.37715	0.623091	0.631696	0.567406	0.65027	0.422459	0.402736	0.619547	0.362565	0.367026	0.275628	0.17938	0.312929	0.200988	0.217034	0.131508	0.0889896	0.27352	0.287203	0.300753	0.234516	0.260269	0.493963	0.239089	0.193122	0.285499	0.371344
B4GALNT3	0.226078	0.128764	0.165001	0.365833	0.162039	0.196097	0.405107	0.28183	0.313344	0.20485	0.240172	0.212189	0.218908	0.424995	0.296929	0.243877	0.262567	0.271921	0.120849	0.421536	0.552609	0.31442	0.30149	0.478293	0.313172	0.335874	0.500077	0.228464
B4GALNT4	-0.0587687	-0.070443	0.0130498	0.0385652	0.180345	0.0730452	0.0914346	0.0517198	0.0197135	0.0548206	-0.0472101	0.070714	-0.0527512	-0.00573716	0.192324	-0.0674622	-0.0125648	0.000311693	0.132332	-0.0381923	0.0638644	0.0451023	0.252664	0.080547	-0.123397	0.128089	0.203775	0.0425215
B4GALT1	-0.795868	-0.664252	-0.909956	-0.735561	-0.533062	-0.597346	-0.61369	-0.559334	-0.593005	-0.822425	-0.673872	-0.486776	-0.719861	-0.500937	-0.536555	-0.751489	-0.625057	-0.722214	-0.811659	-0.704657	-0.597073	-0.573898	-0.560268	-0.573507	-0.670849	-0.49521	-0.529703	-0.606166
B4GALT2	1.01528	0.784077	0.763974	0.608879	0.436929	0.234268	0.947926	1.6481	0.190531	0.912093	0.715121	0.197494	0.705841	0.73715	0.502855	0.731364	0.493743	0.589244	0.666005	0.879436	0.292707	0.376576	0.214567	0.572551	0.431393	0.492903	0.650665	0.105894
B4GALT3	-0.123311	-0.189428	0.371322	0.319412	0.475276	0.153219	0.361768	0.364765	0.116789	0.0145043	0.0438133	-0.0142666	0.0298078	-0.0540675	-0.0846999	0.305377	0.0710644	-0.189671	0.209972	0.283172	0.131622	-0.0240108	-0.0179024	0.0443269	0.103006	-0.0150578	-0.12979	0.148138
B4GALT4	-0.0600089	0.179759	0.0589228	-0.0863536	0.14243	-0.1127	-0.079572	-0.0666015	0.0608942	0.0027206	-0.0260759	0.223092	0.0386353	-0.137472	-0.121761	0.155678	-0.161864	-0.189677	0.0530407	-0.12725	-0.0660095	-0.0847682	-0.0317289	-0.471005	-0.00169041	0.117564	-0.00459219	0.0658219
B4GALT5	-0.681757	-0.378317	-0.280922	-0.452559	-0.732307	-0.481368	-0.257012	-0.278966	-0.505057	-0.253765	-0.656279	-0.597541	-0.388033	-0.347675	-0.456322	-0.602082	-0.402407	-0.61013	-0.493953	-0.485858	-0.461595	-0.476369	-0.580595	-0.580765	-0.356249	-0.490411	-0.563807	-0.286277
B4GALT6	0.0484439	-0.104267	0.0362377	-0.041859	0.136076	0.0399235	-0.0457559	-0.0435346	-0.120819	0.10922	0.00734767	0.0167662	-0.055595	-0.0167196	-0.0569998	0.174153	0.0909445	0.0280513	0.0807618	-0.0703876	-0.0373	0.049961	0.103122	0.0576175	0.0835446	0.0485082	-0.106736	-0.048275
B4GALT7	0.0294165	0.188	0.174645	0.249528	0.104954	0.00452353	0.2837	0.218661	0.110702	0.12816	0.209438	0.0998524	0.19166	-0.000972608	0.143948	-0.0977703	0.15114	0.112212	0.0765186	0.0185215	-0.0315868	-0.152975	0.0824492	0.185658	-0.0426139	-0.0430022	0.0354254	0.103225
B4GAT1	-0.477726	-0.374346	-0.247345	-0.420936	-0.582551	-0.202878	-0.118162	-0.31735	-0.26034	-0.144792	0.181846	-0.117263	-0.00593614	-0.335402	-0.0761103	0.209392	0.298778	0.126433	0.131922	0.117351	0.0214546	0.134491	0.0463216	0.194598	0.224923	0.268929	0.0469317	-0.00360032
B9D2	0.454431	0.299981	0.214649	0.13221	0.257521	0.472238	0.250555	0.146788	0.264996	0.212891	0.340718	0.372439	0.288252	0.242194	0.133693	0.285779	0.255362	0.28177	0.327934	0.135326	0.187817	0.264717	0.0745319	0.290438	0.132787	0.18046	0.0597656	0.202505
BAAT	-0.70025	-0.227816	-0.422268	-0.323157	-0.290933	-0.542344	-0.622508	-0.489539	-0.672901	-0.537887	-0.511272	-0.435377	-0.471312	-0.476363	-0.214817	-0.483483	-0.474404	-0.488789	-0.665852	-0.421837	-0.636771	-0.507157	-0.572623	-0.86539	-0.548777	-0.354478	-0.772942	-0.851405
BABAM1	1.68724	1.16618	1.43759	1.02195	1.12311	1.48549	1.28093	1.16098	1.70359	1.30413	1.40652	1.15044	1.50188	1.65691	1.52501	1.23652	1.34802	1.17538	0.947395	1.12548	1.04	0.744095	1.0791	1.03125	0.944051	1.16082	0.72675	0.853014
BACE1	-0.157603	-0.270416	-0.325055	-0.157984	-0.167886	-0.105781	-0.188714	0.0481287	-0.213458	-0.242334	-0.212572	-0.124746	-0.22436	-0.222424	-0.191253	-0.233041	-0.265811	-0.231231	-0.252139	-0.233207	-0.23489	-0.0994599	-0.354073	-0.296459	-0.187221	-0.215688	-0.195977	-0.167632
BACE2	0.0065533	0.154494	0.148379	0.252001	0.171001	0.175443	0.0872146	0.109576	0.201417	0.208181	0.0689395	0.0863351	0.0206013	0.0240471	-0.00860479	0.0294522	-0.0206811	0.0561758	0.0777385	-0.0478614	0.114992	-0.0511623	0.0754948	0.139106	0.0262887	0.0283268	0.0589183	-0.049199
BACH1	-0.774661	-1.10815	-1.56441	-1.02829	-0.941462	-1.23399	-1.06125	-0.804156	-1.09899	-0.950791	-1.34283	-1.01924	-1.3391	-0.644665	-0.73336	-1.2411	-1.04586	-0.732081	-0.939171	-0.84446	-1.088	-0.731693	-0.883984	-0.791359	-0.868612	-0.977007	-0.97323	-1.10285
BACH1-IT3	-0.0201466	0.012154	-0.157819	0.192343	0.24209	-0.0467553	-0.140828	-0.0471077	-0.307001	-0.124891	-0.168467	-0.13128	-0.0496647	-0.0676865	0.00710749	-0.0263054	-0.154736	-0.182716	-0.282354	-0.288831	-0.34866	-0.231893	-0.530749	-0.132052	-0.095904	-0.0182304	-0.227746	-0.278953
BACH2	0.277675	0.341514	0.325969	0.254725	0.331273	0.296265	0.250157	0.211384	0.30885	0.237989	0.252851	0.204365	0.200248	0.207595	0.188444	0.121377	0.120983	0.0302414	0.0435662	0.190789	0.171256	0.167791	0.296322	0.232881	0.115717	0.221188	0.25314	0.0967063
BAG1	0.0703983	0.0433404	0.0590078	0.036502	0.0375081	0.00916987	0.118353	-0.0563319	-0.0590715	0.191674	0.0755593	0.071286	0.101524	0.189721	-0.0981194	0.0561693	0.288815	0.161314	0.00550129	0.00227471	0.119241	0.0239333	0.169642	0.121225	-0.088278	-0.0226985	0.242251	0.0664521
BAG2	0.424416	0.328841	0.215018	0.145209	0.309237	0.295827	0.198418	0.143206	0.0978276	0.241826	0.272102	0.402236	0.241068	0.210722	0.0609643	0.290756	0.0716367	0.159616	0.233494	0.300748	0.32769	0.131526	0.119602	-0.299159	0.153377	0.127653	-0.186699	-0.123456
BAG4	-0.549267	-0.439115	-0.369268	-0.625422	-0.635721	-0.649121	-0.435704	-0.50212	-0.516477	-0.497456	-0.577647	-0.565154	-0.620336	-0.589258	-0.484947	-0.420675	-0.611767	-0.552004	-0.459306	-0.488658	-0.506687	-0.520249	-0.371208	-0.432547	-0.355089	-0.498391	-0.365018	-0.549025
BAG6	0.799377	0.605277	0.570915	0.638371	0.5594	0.686052	0.669932	0.436123	0.780379	0.750751	0.742241	0.550564	0.823086	0.737531	0.610923	0.430219	0.537249	0.680325	0.447859	0.447908	0.666372	0.576141	0.590418	0.296174	0.537277	0.755912	0.476801	0.499062
BAGE2	0.95129	0.957377	0.763432	0.965032	1.19991	0.839577	0.937793	0.779169	0.924286	0.713494	0.853699	0.625313	0.789292	0.428238	0.404318	0.124788	0.362426	0.455775	0.27107	0.0150701	0.254752	0.401265	0.429758	0.4293	0.159033	0.373254	0.465625	0.519862
BAGE4	-0.32146	-0.293417	-0.565263	-0.453284	-0.373357	-0.480695	-0.3839	-0.191495	-0.483751	-0.40358	-0.591671	-0.428374	-0.532428	-0.29522	-0.230871	-0.443776	-0.327543	-0.235437	-0.389787	-0.34244	-0.416997	-0.186947	-0.260451	-0.36219	-0.178824	-0.31744	-0.116037	-0.333277
BAHD1	0.278744	0.39079	0.227523	0.510474	0.500227	0.443363	0.279179	0.260943	0.435017	0.680246	0.395736	0.718972	0.578529	0.617141	0.481046	0.604515	0.604444	0.577495	0.469497	0.705167	0.516247	0.400356	0.480159	0.57282	0.533484	0.530658	0.543583	0.334035
BAIAP2	0.0865142	0.203577	0.0946089	-0.0940375	0.0312111	0.145565	0.00381496	0.0268384	0.142052	0.191923	0.306854	0.0878406	0.268772	0.190307	0.321753	0.0554831	0.226299	0.2608	0.215403	0.101778	0.329049	0.170774	0.289434	0.176117	0.379111	0.541232	0.247074	0.347113
BAIAP2L1	0.180841	-0.118851	-0.01383	-0.106664	0.307003	0.0327465	0.135223	0.0277249	0.00098305	-0.161425	-0.126711	0.168023	-0.315861	0.0436242	0.150638	-0.0336113	-0.00142488	0.135368	0.19208	0.0573585	0.331347	0.13857	-0.031345	0.20608	0.159465	0.0529048	0.0289612	0.20948
BAIAP2L2	-0.133373	-0.196351	-0.369135	-0.00981028	0.00232791	-0.251358	-0.317838	-0.239921	-0.312131	-0.152186	-0.256171	-0.0606109	-0.313294	-0.250504	-0.314962	-0.385225	-0.289432	-0.362711	-0.301028	-0.436171	-0.317714	-0.137952	-0.248121	-0.0870869	-0.204457	-0.284859	-0.189662	-0.246656
BAIAP3	0.263211	0.559503	0.407384	0.504031	0.448048	0.653255	0.653764	0.450229	0.426735	0.473033	0.69418	0.457099	0.399125	0.406806	0.383673	0.335108	0.350629	0.365738	0.520843	0.560521	0.390472	0.435014	0.392215	0.550796	0.2383	0.388369	0.383953	0.526234
BAK1	0.52845	0.50063	0.427123	0.385118	0.463345	0.883518	0.516728	0.17653	0.319812	0.447623	0.261569	0.664772	0.357816	0.501595	0.178428	0.371704	0.21166	0.2401	0.302551	0.163307	0.608675	0.672048	0.750381	0.44251	0.458149	0.483329	0.638413	0.432714
BAMBI	-1.17598	-1.08461	-1.07756	-0.717859	-1.36999	-1.18479	-1.03367	-0.810123	-0.732286	-0.720892	-0.820305	-1.16171	-0.553763	-1.02658	-0.659118	-0.655483	-0.789475	-0.64487	-0.637757	-0.538681	-0.535127	-0.58815	-0.747981	-0.963239	-0.620497	-0.48439	-0.584224	-0.664588
BANCR	0.0965886	0.400427	0.201285	0.643877	0.296591	0.25042	0.179084	-0.194063	0.210934	-0.072866	0.234395	0.153178	0.178605	-0.00241403	0.340018	0.437524	0.241236	0.406702	0.237285	0.376295	0.444891	0.350583	0.0773829	0.705428	0.225684	0.190262	0.532729	0.403471
BANK1	0.520208	0.502777	0.397967	0.368475	0.407472	0.482831	0.50833	0.355088	0.403875	0.406628	0.457346	0.584627	0.534717	0.440522	0.435817	0.485875	0.459577	0.322894	0.500274	0.367707	0.426798	0.418884	0.513767	0.631251	0.471455	0.361171	0.322464	0.31946
BAP1	0.501507	0.326537	0.372374	0.175228	0.408278	0.317947	0.486654	0.315553	0.334266	0.27967	0.360453	0.404546	0.145999	0.344425	0.503758	0.500785	0.5481	0.330701	0.39047	0.446011	0.369592	0.328915	0.409354	0.303512	0.239487	0.290841	0.284146	0.331927
BARD1	-0.248071	-0.257876	-0.320953	-0.191106	-0.343855	-0.464773	-0.329628	-0.519968	-0.227042	-0.158658	-0.44673	-0.316625	-0.288421	-0.429919	-0.254985	-0.236115	-0.395328	-0.186043	-0.362462	-0.295298	-0.234572	-0.477268	-0.301144	-0.430968	-0.30406	-0.404181	-0.323548	-0.290861
BARHL1	0.101226	-0.0429943	-0.0555727	-0.0387047	0.248134	0.0874686	-0.12235	0.100768	-0.0471739	0.0218485	0.0701197	-0.0193817	0.0495881	-0.0109437	-0.0435476	0.28979	-0.0636126	0.283627	-0.396181	0.165864	0.187174	-0.172484	-0.0900626	-0.295885	0.0889535	-0.179903	0.00164559	0.0400184
BARX1	-0.0682101	-0.630867	-0.125904	-0.337626	0.0958306	0.185438	-0.0772145	-0.23293	-0.834784	-0.17542	-0.0713281	-0.216148	-0.241093	-0.240412	0.289001	0.0110446	-0.270839	-0.550131	0.155004	-0.359359	-0.329225	-0.175504	0.120514	-0.327495	0.134432	0.0942773	0.0878663	0.128298
BARX2	0.118794	0.337301	0.0789337	0.192077	0.367579	0.283852	0.243564	0.407118	0.209404	0.669571	0.241971	0.334309	0.323594	0.340661	0.354106	0.15509	0.108481	0.0713856	0.238399	0.208541	0.171376	0.215521	0.324362	0.205043	0.0712595	0.212792	0.108065	0.0678003
BATF	-1.21187	-0.879294	-0.967513	-0.814941	-1.23768	-1.17681	-0.902772	-0.927845	-0.89845	-0.703578	-1.02034	-0.942356	-0.589485	-1.18484	-1.00106	-1.06943	-0.840057	-0.858284	-0.844587	-1.00804	-0.918648	-1.01759	-0.970805	-0.830815	-1.05237	-0.81454	-0.870033	-0.771116
BATF2	0.181457	0.122861	0.228055	0.368708	0.157748	0.114321	0.214217	0.346052	0.293055	0.185389	0.33811	0.140198	0.38382	0.235245	0.092405	0.0802378	-0.0048826	-0.191842	0.222898	-0.0159382	-0.16066	0.119644	0.191133	0.266209	-0.125068	0.0646347	0.199675	-0.176664
BATF3	-0.0524955	0.0704752	0.0943994	0.0889486	-0.00114733	-0.0600195	0.126401	0.0322476	0.194224	0.01763	0.0660495	0.0750624	0.145168	0.0179031	0.163514	0.0279407	0.267804	0.0445801	0.0655739	0.123881	-0.0222418	0.117632	0.0450955	0.284991	0.16968	0.0689923	0.0866623	0.117729
BAZ1A	-0.0916567	-0.0972096	0.0754172	-0.162704	0.131743	-0.0201982	-0.396437	-0.320282	0.126311	-0.0829985	-0.084586	-0.198203	-0.248939	-0.19065	-0.161735	-0.344683	-0.181733	-0.104705	-0.0204717	-0.157635	-0.0283812	-0.25751	0.249517	-0.172486	0.0746216	-0.219475	-0.124275	-0.170625
BAZ1B	-0.586858	-0.431604	-0.442787	-0.545733	-0.697583	-0.28199	-0.305467	-0.402002	-0.241845	-0.371315	-0.289598	-0.134662	-0.188542	-0.238696	-0.357135	-0.229255	-0.453845	-0.0313966	-0.318277	-0.294264	-0.0628731	-0.05674	-0.202928	-0.368991	-0.151049	-0.0558253	-0.250026	-0.0643254
BAZ2A	0.120946	0.0734075	0.152644	0.116933	0.167342	0.140879	0.02894	-0.0391923	0.0799505	0.133064	0.266062	-0.0215174	0.202052	0.0332617	0.190573	0.0799106	0.134531	0.225413	0.276564	0.0986517	0.183689	0.176147	0.278419	0.279929	0.0826628	0.0410152	0.0560798	0.175935
BAZ2B	-1.04986	-0.815813	-1.08406	-0.826994	-0.801404	-0.729073	-0.743967	-0.462692	-0.781877	-0.787437	-0.80017	-0.805865	-0.88958	-0.513051	-0.542481	-1.09425	-0.928338	-0.747356	-0.787646	-1.02005	-0.90488	-0.772276	-0.726947	-0.843805	-0.921867	-0.788782	-0.788143	-0.863972
BBOF1	-0.760243	-0.423303	-0.55204	-0.643762	-0.475447	-0.527425	-0.673011	-0.375413	-0.510896	-0.311327	-0.680382	-0.426562	-0.351646	-0.372435	-0.464172	-0.554729	-0.410176	-0.32372	-0.908198	-0.409479	-0.435346	-0.293646	-0.449119	-0.67783	-0.531715	-0.524511	-0.634537	-0.611945
BBOX1-AS1	0.137305	0.0374203	-0.115517	-0.108402	-0.0979983	0.0969261	0.0230972	-0.0621765	-0.139562	-0.0171213	-0.220058	0.00598322	-0.187465	-0.0881536	-0.130108	0.00785414	-0.317421	-0.00795189	-0.0599122	-0.0981018	-0.126176	-0.129621	-0.11151	-0.222854	-0.0409151	-0.0920971	-0.155054	-0.102565
BBS1	0.116197	-0.0344967	-0.0270039	-0.165674	-0.0243252	-0.144456	-0.002508	-0.0391169	0.115543	0.0451234	-0.0620007	0.091618	0.0912954	0.134275	0.07952	-0.0664965	0.0542804	0.0472828	0.0320614	-0.0701042	-0.00673404	-0.104341	-0.380161	-0.0943652	-0.223036	0.0171386	-0.303912	-0.334751
BBS12	-0.416351	-0.172037	-0.276745	-0.254275	-0.153813	-0.243417	0.012629	-0.257852	-0.108527	-0.201503	-0.0655127	-0.279484	-0.281989	-0.174493	-0.193735	0.0293871	-0.20917	-0.0324807	-0.090543	-0.145034	-0.0580173	-0.196782	0.165659	-0.217386	-0.135254	-0.295472	-0.190985	-0.0796873
BBS2	-0.377281	-0.0514757	-0.293063	-0.116532	0.0196805	-0.188773	-0.782368	-0.11663	0.0812641	0.0220129	-0.213223	0.0153921	0.313356	-0.00142532	-0.0960196	0.175836	0.33884	-0.00147248	-0.0856415	0.124712	0.296549	0.0202558	0.147083	0.138275	0.094242	0.0310734	-0.0280786	0.343173
BBS4	-0.316611	-0.268976	0.013378	-0.0859421	-0.00896263	-0.00442865	-0.19345	-0.148605	-0.135261	0.0117216	0.0291068	0.00936469	0.0570772	0.0469543	0.116092	-0.16782	0.0261069	0.0341323	0.0399908	0.0161256	-0.00691822	-0.0246468	-0.0312544	-0.160105	0.10213	0.170748	-0.0172434	0.0971341
BBS5	-0.00695356	-0.179137	-0.163041	-0.0981109	-0.0168882	-0.295283	-0.249465	-0.167859	0.0411851	-0.239278	0.0832343	0.109794	-0.240014	-0.0426331	0.0350744	-0.210887	-0.0722791	-0.0712215	-0.16657	-0.249598	-0.143397	0.0202265	-0.217385	0.106384	0.225092	0.0198956	0.228764	-0.0589947
BBS7	-0.541444	-0.2049	-0.0822203	-0.443248	-0.10622	-0.477268	-0.324847	-0.243309	-0.473895	-0.202919	-0.436682	-0.335783	-0.254003	-0.429677	-0.280776	-0.426073	-0.116629	-0.334637	-0.218044	-0.185863	-0.386334	-0.38437	-0.500973	-0.46437	-0.179688	-0.374578	-0.548774	-0.0503602
BBS9	-0.815874	-0.368461	-0.405454	-0.50388	-0.48929	-0.51528	-0.724859	-0.438378	-0.627917	-0.343152	-0.449409	-0.488738	-0.514657	-0.683952	-0.455172	-0.33395	-0.282764	-0.338172	-0.25651	-0.383544	-0.187903	-0.21364	-0.170487	-0.364312	-0.0592347	-0.27009	-0.209476	-0.0469483
BBX	-0.0747932	-0.147562	0.0416858	-0.286757	-0.18681	-0.114737	-0.130536	-0.121764	-0.0684996	0.00533979	-0.152579	-0.0353441	-0.12128	-0.16509	0.017488	-0.114332	-0.0632754	-0.025118	-0.0810222	-0.000961694	0.0677069	0.0695541	-0.117823	-0.0734202	0.0222824	0.113896	0.162729	-0.12061
BCAM	0.146702	0.00231329	0.0619528	0.00793215	0.0221383	0.159108	0.333691	0.0605	0.718327	0.288321	0.533642	0.30741	0.250526	0.422179	0.233688	0.316851	0.482339	0.257055	0.253061	0.160422	0.240753	0.317546	0.41275	0.092335	0.211308	0.284266	0.259572	0.360363
BCAN	-0.184225	0.0123912	0.101802	-0.00467692	-0.00987405	-0.129019	0.118556	0.0372	-0.0330176	0.191643	-0.166102	0.246842	0.0759254	0.155445	-0.0273949	0.0196269	0.124525	0.0995751	0.0830182	0.203031	0.0463464	0.0228111	-0.163681	0.272767	0.136548	0.0410949	0.140052	0.271902
BCAP29	-0.449827	-0.278858	-0.174819	-0.255547	-0.359075	-0.404041	-0.0587058	-0.296508	-0.475117	-0.183174	-0.00766888	-0.158376	-0.198279	-0.0943123	0.124267	0.0848211	-0.128486	-0.0246929	0.179286	0.163712	-0.221868	-0.00585999	-0.0398671	-0.0406713	0.0107453	0.0490251	-0.184552	-0.0229932
BCAP31	-1.00861	-0.804762	-0.688243	-0.519601	-0.652962	-0.411519	-0.487514	-0.373497	-0.752224	-0.441612	-0.598055	-0.477713	-0.491128	-0.485505	-0.547598	-0.408618	-0.31906	-0.311347	-0.157695	-0.334821	-0.474968	-0.622887	-0.475591	-0.451064	-0.58354	-0.494623	-0.789508	-0.391073
BCAR1	0.12281	-0.0615011	0.114865	0.0499217	-0.0918787	0.217459	0.0274155	0.208369	0.295824	0.16932	0.302705	0.236258	0.34102	0.325432	0.610775	0.685055	0.611562	0.67867	0.751221	0.666468	0.540344	0.452668	0.648407	0.799818	0.466354	0.613379	0.466404	0.366809
BCAR3	-0.270081	-0.182994	-0.187943	-0.0374668	-0.134382	-0.142044	-0.141911	-0.174751	-0.186949	-0.0598545	-0.0322848	-0.164475	-0.130481	-0.175091	-0.275511	-0.099296	-0.117203	-0.187038	-0.146985	-0.242476	-0.312449	-0.206176	-0.244803	-0.208118	-0.200712	-0.267399	-0.119434	-0.250568
BCAS2	-0.655909	-0.497249	-0.745052	-0.672266	-0.645378	-0.670631	-0.73809	-0.703257	-0.954229	-0.710421	-0.600086	-0.686561	-0.490841	-1.05352	-0.667673	-0.480772	-0.733091	-0.571939	-0.338241	-0.454401	-0.654371	-0.655484	-0.694163	-0.592343	-0.440892	-0.621929	-0.977523	-0.623781
BCAS3	-0.525961	-0.412265	-0.54059	-0.586907	-0.576538	-0.558758	-0.498093	-0.495898	-0.532336	-0.418313	-0.42517	-0.519453	-0.38432	-0.487004	-0.433934	-0.431074	-0.436504	-0.604025	-0.561133	-0.519255	-0.424802	-0.325232	-0.488917	-0.495431	-0.32482	-0.25073	-0.38214	-0.332613
BCAS4	-0.547611	-0.446557	-0.5879	-0.512588	-0.597112	-0.538306	-0.605917	-0.605448	-0.656804	-0.301789	-0.643921	-0.50817	-0.504988	-0.516342	-0.647012	-0.548201	-0.642804	-0.60661	-0.80502	-0.481982	-0.516277	-0.482257	-0.607882	-0.872389	-0.428947	-0.487633	-0.648187	-0.573161
BCAT1	-0.314396	-0.388324	-0.351655	-0.476978	-0.642211	-0.498087	-0.325889	-0.296348	-0.614313	-0.399151	-0.649826	-0.5923	-0.398192	-0.635969	-0.161446	-0.518409	-0.289987	-0.295821	-0.440905	-0.394726	-0.638707	-0.583417	-0.935379	-1.0689	-0.523879	-0.658203	-0.526202	-0.68838
BCAT2	-0.134154	-0.106788	-0.416667	-0.136611	-0.0524399	-0.188512	-0.50973	-0.075561	-0.342046	-0.189308	-0.255772	-0.150329	-0.338023	-0.0834211	-0.145633	-0.336875	-0.0556117	-0.340891	-0.383944	-0.133963	-0.222697	-0.177078	-0.136045	-0.438873	-0.0495953	-0.145287	-0.304824	-0.25066
BCCIP	-0.504169	-0.465541	-0.548238	-0.294384	-0.256174	-0.233224	-0.23346	-0.511348	-0.830077	-0.357922	-0.220476	-0.386432	-0.230909	-0.362969	-0.259679	-0.456185	-0.336626	-0.214411	-0.335141	-0.279384	-0.171069	-0.228244	-0.484311	-0.0635229	0.00364394	-0.104404	0.015577	-0.22479
BCDIN3D	0.214339	0.173147	-0.206478	0.0571413	0.185094	0.147447	0.146371	0.129506	-0.0696499	0.135706	0.106825	0.00834422	-0.00723093	0.377789	0.181894	0.190815	0.154903	0.335477	0.168685	0.217601	0.193179	0.127905	0.166344	0.122366	0.185712	0.161673	0.153317	0.0382353
BCHE	-0.504608	0.0303103	-0.19234	0.00757326	-0.220106	-0.0969831	-0.230517	0.0124851	-0.318951	-0.131598	-0.140166	-0.1161	-0.0260667	0.0132663	0.149607	0.0963824	-0.102126	0.0427929	0.132575	-0.18958	-0.220675	-0.0552464	-0.0778383	0.20586	0.148985	0.317426	-0.104416	0.0131596
BCKDHA	-0.0656621	-0.063076	-0.0417141	0.0399535	0.0641279	-0.0371295	0.0424442	0.0147925	-0.0482971	-0.0884792	-0.14025	0.0285857	-0.0979226	0.0522854	-0.0219177	0.243589	0.0838542	0.0677801	0.192969	0.16698	0.206981	0.181285	0.122549	0.16956	0.567777	0.026192	-0.108654	0.0244631
BCKDHB	-0.000336534	-0.11204	-0.156801	-0.12824	0.0172078	-0.0873404	-0.113994	-0.0316339	-0.0944582	-0.196684	-0.082374	0.1528	-0.174963	-0.0814083	-0.0422537	0.101289	0.0130051	-0.00476369	0.0344051	0.0868292	-0.0714428	-0.018359	0.109462	-0.00519023	0.00806497	0.0435531	-0.0466446	0.0887558
BCKDK	0.461049	0.415442	0.262359	0.374813	0.281154	0.262035	0.15011	0.233526	0.339928	0.205232	0.272185	0.385624	0.445279	0.173092	0.305124	0.274532	0.249187	0.106789	0.195807	0.160116	0.139125	0.113738	0.288289	0.434291	0.173569	0.129682	0.163314	0.1856
BCL10	0.246698	0.0677456	0.0879594	0.202483	0.250524	0.603757	0.156573	0.254602	0.0383387	0.239351	0.286656	0.224718	0.101374	0.544728	0.280426	0.347111	0.398253	0.218071	0.351076	0.155006	0.353168	0.351882	0.286771	0.545504	0.469847	0.431132	0.0434751	0.213023
BCL11A	0.119272	0.0657383	0.0874203	0.118047	0.0539019	0.29298	0.0285201	0.228342	0.235521	0.0546042	0.0848333	0.0722292	0.0653253	0.0597923	-0.0701769	-0.00105924	0.064846	0.0153466	-0.061834	-0.0206688	0.0929643	0.0452385	0.0927265	-0.0906791	0.0600899	0.00917816	0.0410546	-0.0861567
BCL11B	-0.0679522	-0.206601	-0.173406	-0.194748	-0.158401	-0.311804	-0.1239	-0.0655511	-0.215577	-0.327353	-0.41906	-0.206764	-0.194917	-0.266246	-0.224313	-0.193903	-0.306018	-0.20662	-0.191722	-0.0056169	-0.133331	-0.188017	-0.185985	-0.176296	-0.154589	-0.0702355	-0.279199	-0.226746
BCL2	0.0819812	0.0741817	0.121231	0.0670978	0.179154	0.0689385	-0.00860022	0.132531	0.0567058	-0.0302246	-0.0384498	0.00336417	0.0326993	0.0149908	0.0485914	0.0150452	-0.134753	-0.0839193	-0.0621377	-0.0130781	0.0674422	0.0406192	0.0482681	0.0893928	0.0235404	0.0826539	-0.105384	-0.022371
BCL2A1	-1.57599	-1.44296	-1.46348	-1.15383	-1.37759	-1.20013	-1.03253	-1.38878	-1.29363	0.225295	-1.29335	-1.26076	-0.766739	-1.42629	-1.67832	-1.1797	-1.41907	-0.996445	-1.59764	-2.01244	-0.786886	-1.0815	-1.14755	-1.42618	-0.984749	-1.04968	-0.973055	-0.945751
BCL2L1	0.166636	0.24335	0.334916	0.179735	0.278326	0.269733	0.357715	0.263597	0.262099	0.138779	0.176323	0.0944295	0.139918	0.105642	0.104503	0.0532798	-0.145344	-0.0178909	-0.0174235	0.0521551	0.0169505	-0.0114143	0.0772738	0.0536631	-0.021325	0.152615	0.0439436	0.142863
BCL2L11	-0.270123	-0.155787	-0.15645	-0.0430115	-0.0773936	0.0374721	-0.264209	0.0841951	-0.271261	-0.303595	-0.328793	-0.31358	-0.136165	0.0941943	-0.0291622	-0.341503	-0.26631	-0.0404785	-0.555935	-0.207816	-0.178684	-0.103534	-0.111522	0.306705	-0.0286774	-0.527675	-0.201095	-0.172019
BCL2L12	0.215577	0.00156811	-0.00250562	-0.161218	0.270535	0.232225	-0.0954153	0.0438239	-0.132381	-0.138147	-0.00675989	-0.385818	-0.0994302	-0.0685747	-0.155807	0.0903868	0.0112312	-0.163166	-0.192195	0.179848	-0.0103436	-0.131413	-0.10969	-0.0212362	-0.0171806	-0.092645	0.114526	-0.091473
BCL2L13	-0.0798856	-0.0668905	-0.145399	0.192324	0.0110255	0.0731808	-0.0710197	-0.168132	-0.074927	-0.01547	0.104849	0.0535898	0.0525979	0.0413751	0.230009	0.0632487	0.114365	0.125162	0.075655	0.172817	0.1673	0.273943	0.284129	0.0808925	0.238044	0.219836	0.10081	0.263247
BCL2L14	0.297391	0.202221	0.328846	0.212302	0.357891	0.269832	0.0882649	0.290496	0.200858	0.236775	0.168835	0.190917	-0.0230357	0.0341356	0.128223	0.0828938	0.0684863	0.118253	0.0913074	0.136124	0.130925	0.0296193	0.140801	0.0800208	0.0680045	0.116706	0.0579151	0.110855
BCL2L15	0.301457	0.002018	0.168762	0.0423819	0.283124	0.0940794	-0.0127427	0.275671	0.080662	0.033379	0.176729	0.0767943	0.0987892	0.0849138	-0.0461114	0.087057	0.0369062	-0.00555041	0.0851589	0.00183084	0.0847264	-0.117059	0.0466097	-0.129033	0.0174127	0.0599573	0.036677	0.0547078
BCL2L2	-0.0663447	0.0613194	-0.0774877	-0.324347	-0.0576355	-0.0917652	0.0401868	-0.235925	-0.275093	0.036976	-0.0064244	-0.109258	-0.0368144	-0.193907	-0.122378	-0.00417916	-0.260704	-0.10377	0.00804009	0.0416048	-0.0563394	-0.142851	-0.0225594	-0.138698	-0.0838706	-0.101671	-0.140623	-0.202474
BCL3	-1.08975	-0.890859	-1.1192	-1.02832	-1.01046	-1.22225	-1.03487	-1.20785	-1.20305	-0.884023	-0.975192	-0.972174	-0.811974	-1.11589	-1.21469	-1.11518	-1.26278	-1.03289	-1.30311	-1.20302	-1.23337	-1.31934	-1.23209	-1.3259	-1.31417	-1.17814	-1.26623	-0.741837
BCL6	0.0344685	0.145055	0.0975875	-0.115271	0.00747954	0.132762	-0.0547076	0.0621368	-0.018259	0.138108	0.0676036	0.0637131	-0.0469295	0.0837924	0.140086	0.257198	0.0929128	0.131799	0.0752367	0.0321462	-0.0212001	-0.00982782	-0.0837663	0.101139	0.0648478	0.123572	0.0649933	-0.158632
BCL6B	-0.944342	-0.515064	-0.64321	-0.711704	-1.11273	-0.84042	-0.563165	-0.852862	-0.59862	-0.714882	-0.701338	-0.329062	-0.592389	-0.535989	-0.731411	-0.486171	-0.505858	-0.28651	-0.508638	-0.302496	-0.516089	-0.880339	-0.46481	-0.572594	-0.774395	-0.376661	-0.937048	-0.808759
BCL7A	0.0473595	-0.211507	-0.228736	-0.200333	0.057492	-0.18024	-0.0376114	-0.14913	0.0240971	-0.089213	-0.107084	0.000171774	-0.0548705	-0.282118	0.036828	-0.150194	0.112727	0.063631	0.290123	0.0280993	0.208696	0.208104	-0.249245	-0.182941	-0.15217	0.227379	0.177773	0.265087
BCL7B	-0.329183	-0.0249529	-0.127434	0.0166176	-0.13322	0.239644	0.248555	-0.17243	0.138784	0.249968	0.152605	0.363405	0.297738	0.286449	0.506952	0.444201	0.463739	0.330863	0.43872	0.418159	0.292939	0.244282	0.283999	0.347289	0.263237	0.280639	0.136794	0.112114
BCL7C	-0.0900629	-0.0967662	-0.0462105	0.03668	-0.189905	0.163465	-0.198462	-0.0133375	0.0439837	-0.00270862	-0.133807	0.0497279	-0.0460859	0.214968	0.129061	0.0230194	0.185603	0.0375663	0.0276719	0.221351	-0.15978	-0.095214	0.0153523	0.476	0.279388	0.140034	0.192884	0.403234
BCL9L	0.571569	0.464903	0.31112	0.442058	0.461401	0.47466	0.465705	0.458362	0.411257	0.373482	0.468649	0.567188	0.396215	0.566499	0.460944	0.537161	0.497938	0.538568	0.544243	0.352838	0.477598	0.51208	0.449466	0.288064	0.45903	0.550192	0.325258	0.190881
BCLAF1	-1.45406	-1.04183	-1.16535	-1.37201	-1.61218	-1.4553	-0.712747	-0.917503	-1.29016	-0.926844	-0.900808	-0.954794	-0.918148	-0.889503	-0.893875	-0.842152	-0.615812	-0.842208	-0.837464	-0.993015	-0.925161	-0.852923	-0.865351	-0.745672	-0.809135	-0.696628	-0.843301	-0.729892
BCO1	0.0953465	0.0146071	-0.0138047	-0.0478956	0.163137	0.101496	0.037609	0.0243246	-0.122848	-0.0515165	-0.0599386	-0.125435	-0.413233	0.00498458	-0.0294165	0.0126088	0.00188731	-0.0744292	-0.113371	-0.241783	-0.0635625	-0.0801595	-0.0350107	-0.0912062	0.00265717	-0.155063	-0.0825226	0.1307
BCOR	0.361122	0.23102	0.271621	0.363668	0.272912	0.333134	0.533091	0.280518	0.391356	0.31357	0.264071	0.316355	0.332494	0.320989	0.284085	0.291348	0.302053	0.170724	0.249125	0.309131	0.248925	0.27604	0.202264	0.416582	0.250705	0.25461	0.32004	0.18446
BCORL1	-0.0577903	-0.152497	-0.0606179	-0.114109	0.0998535	-0.0841775	0.0374012	-0.0755595	-0.192339	-0.20402	-0.15749	-0.151832	-0.135819	-0.139029	-0.105271	0.0270339	-0.157019	-0.129503	-0.0716047	-0.0631335	0.0504875	-0.0608748	-0.128516	-0.108606	-0.0540969	-0.0330041	-0.126814	-0.0386486
BCR	-0.314444	-0.099984	-0.18921	-0.39347	-0.317293	-0.243485	-0.250689	-0.310328	-0.378522	-0.305609	-0.240257	-0.149195	-0.430897	-0.0643164	-0.207244	-0.31246	-0.255577	-0.339974	-0.455284	-0.496512	-0.42602	-0.331851	-0.356169	-0.428818	-0.352306	-0.362476	-0.349113	-0.436329
BCS1L	0.462416	0.605755	0.60698	0.429679	0.4748	0.46612	0.494386	0.39911	0.566204	0.517007	0.506061	0.544578	0.556421	0.332517	0.364501	0.336811	0.342523	0.291289	0.332464	0.41596	0.474138	0.32892	0.433768	0.31286	0.37489	0.299713	0.304774	0.407143
BDH1	0.860759	-0.0865291	0.851322	0.453707	0.685341	0.860293	0.524651	0.7972	1.31055	0.459449	0.798279	0.743826	0.874292	0.975139	0.693408	0.78467	0.80438	0.694042	0.724433	0.995289	0.895344	1.03919	0.977619	1.30981	0.784203	1.1265	0.479391	0.831618
BDKRB1	-0.255907	-0.363692	-0.315905	-0.646805	-0.165629	-0.388414	-0.518234	-0.307851	-0.568572	-0.288439	-0.569059	-0.245458	-0.538816	-0.293548	-0.258399	-0.418032	-0.620119	-0.497363	-0.758353	-0.830656	-0.556494	-0.492249	-0.555182	-0.886332	-0.315149	-0.512024	-0.703785	-0.811962
BDKRB2	-0.03907	-0.0610512	0.041728	-0.255189	-0.355352	-0.151306	-0.0636575	-0.0791143	0.120743	-0.120452	-0.403089	0.0898487	0.170344	0.123069	-0.0609506	0.0580584	0.193748	-0.0559474	0.0768033	0.0779293	0.0936227	0.24153	0.0394513	0.0144938	-0.0219896	0.09472	-0.0224266	-0.251843
BDP1	-0.873925	-0.839143	-0.740075	-0.78487	-0.590101	-0.866833	-0.70401	-0.689618	-1.09512	-0.931052	-0.716837	-0.710908	-0.721822	-0.872638	-0.57972	-0.842564	-0.506211	-0.545822	-0.518052	-0.627097	-0.724428	-0.672257	-0.887153	-1.02881	-0.802332	-0.734096	-0.931936	-0.941945
BECN1	-0.597705	-0.361728	-0.640561	-0.287503	0.0548414	-0.254698	0.0465488	-0.555182	-0.26655	-0.502697	-0.318761	-0.460038	-0.410107	-0.205989	-0.21089	-0.142678	0.039377	0.14625	0.264994	-0.209232	-0.316863	0.143557	0.104352	0.309654	0.140759	0.174038	0.240703	0.317284
BEND3	-0.213645	0.0977814	0.0572086	-0.297911	-0.0796413	-0.13711	-0.0688892	0.180585	-0.308599	-0.162863	-0.29852	-0.129029	-0.103895	-0.204842	-0.07686	-0.00661067	-0.0880206	-0.0197484	-0.151801	-0.171358	0.023475	-0.131957	-0.20415	-0.245834	-0.182021	-0.137357	-0.457961	-0.264092
BEND4	-0.546174	-0.246268	-0.438565	-0.23518	-0.34493	-0.306893	-0.427544	-0.0239107	-0.431829	-0.455367	-0.473674	-0.126952	-0.357988	-0.319107	-0.253696	-0.114116	-0.26503	-0.290832	-0.510716	-0.0848634	-0.252287	-0.226799	-0.276268	-0.245913	-0.258101	-0.13363	-0.262473	-0.380901
BEND6	-0.231827	0.02829	0.0155259	0.0730306	0.0940172	-0.11451	-0.156663	-0.00453062	-0.253173	-0.136971	-0.267637	-0.23802	-0.0428666	-0.385111	-0.123085	-0.0757297	-0.206306	-0.0747132	-0.223372	-0.152341	-0.237936	-0.136183	-0.103271	-0.107782	-0.0862362	0.0992233	-0.0235975	-0.0122981
BEND7	-0.0644419	-0.123557	-0.00497089	-0.307048	0.0440601	-0.244368	0.0495361	-0.0587816	-0.341877	-0.141629	-0.0217708	-0.208864	-0.365267	0.115768	-0.161023	0.0563345	-0.167288	0.0832068	-0.163862	0.0222294	-0.171546	0.0313108	-0.226178	0.113739	-0.105651	-0.161527	-0.0491813	-0.0968148
BEST1	0.392849	0.453269	0.183715	0.109546	0.226636	0.419781	0.188323	0.187581	0.356209	0.418144	0.211833	0.320206	0.231082	0.301456	0.262637	0.00431459	0.242343	0.313361	0.209628	0.224883	0.18921	0.186287	0.146529	0.0679648	0.129836	0.0755992	0.155868	0.272672
BEST3	-0.0398196	-0.0876426	-0.0399033	-0.132974	-0.0446641	-0.0434003	-0.0610627	-0.184607	-0.307486	-0.172929	-0.126018	-0.0976432	-0.137884	-0.188837	0.147472	-0.152423	-0.115178	-0.0908529	-0.191997	-0.123697	-0.146474	-0.0775199	-0.2169	-0.20265	-0.0625878	0.0735206	-0.112616	-0.0163141
BET1L	0.13537	-0.130901	-0.218468	0.33602	-0.0311815	0.0924638	0.24158	-0.273066	0.0450435	0.0694507	0.217742	0.110078	0.0847662	0.130488	0.0664478	0.327118	0.201871	0.348113	-0.0510961	0.207666	0.0138672	0.16958	0.22882	-0.130198	-0.0927378	0.0907437	-0.29979	0.0320156
BEX2	-0.866963	-0.377334	-0.600914	-0.442601	-0.855215	-0.716576	-0.731907	-0.436323	-0.367641	-0.478676	-0.44953	-0.413679	-0.230644	-0.629382	-0.727959	-0.513782	-0.39303	-0.280116	-0.520522	-0.497594	-0.490968	-0.331874	-0.405361	-0.55382	-0.288139	-0.342244	-0.370043	-0.373656
BEX3	-0.465803	-0.740525	-0.697147	-0.793411	-0.703345	-0.635461	-1.26224	-0.152199	-0.729956	-0.730888	-0.652215	-0.694776	-0.64221	-0.416432	-0.504418	-0.477857	-0.0971243	-0.344876	-0.488387	-0.201242	-0.649435	-0.667166	-0.485337	-0.294575	-0.447298	-0.619834	-0.762834	-0.742621
BEX5	0.130878	0.034219	0.0870836	0.188558	0.204619	0.120156	0.0435747	0.0669293	0.251836	0.0918482	0.170101	0.429583	0.115935	0.0827688	0.0812071	0.0693655	0.0668783	0.150622	0.241501	0.13028	0.150635	0.0505362	0.431588	0.143213	0.237456	0.154164	-0.0749769	0.177716
BFAR	0.323195	0.157759	0.342577	0.315214	0.428983	0.300649	0.271966	0.22649	0.258473	0.238203	0.121383	-0.148619	0.142497	-0.101479	0.165232	0.173282	0.103409	0.187814	0.146703	0.287238	0.0979957	-0.0321265	0.192779	-0.0576648	0.176378	0.00243698	-0.0515175	0.206484
BFSP2	-0.0463227	0.170111	0.120944	0.129851	0.254413	0.199987	0.059492	0.238192	0.111732	0.103642	0.0105381	-0.0148321	-0.00321195	-0.0157373	0.0177676	0.0246126	0.141434	0.00309971	-0.0775887	-0.0210266	0.125011	-0.0603895	-0.0602655	0.15257	-0.0587642	0.0630329	0.0188129	0.0512309
BGLAP	-0.997838	-1.07888	-0.868431	-1.23439	-1.0197	-1.08907	-0.983956	-0.873179	-0.972668	-0.83678	-0.985911	-0.741734	-0.889204	-0.553109	-0.537352	-0.678419	-0.89458	-0.823609	-0.906228	-0.7757	-0.978207	-0.487771	-0.718165	-0.70762	-0.534195	-0.642977	-0.827051	-0.811603
BGN	-0.388605	-0.0793423	-0.00793286	1.15107	-0.17168	0.191669	0.538667	0.578725	0.257731	0.238994	0.455609	-0.122644	0.284249	0.337663	0.234008	0.404586	0.561747	0.273845	0.386164	0.229685	0.631783	0.688501	0.436467	0.620695	0.0211778	0.236887	0.588678	0.991261
BHLHB9	-0.229188	-0.18194	-0.149757	-0.206047	-0.18181	-0.222728	-0.16235	-0.04295	-0.166141	-0.083211	-0.206605	-0.120335	-0.152533	-0.187232	-0.201731	-0.178647	-0.0327349	-0.137733	-0.132141	-0.0510137	-0.175597	-0.0188925	-0.14076	-0.0505352	-0.0324835	-0.0637675	-0.0713261	-0.00443951
BHLHE22	0.086284	0.0974387	0.0911745	0.128481	0.176176	0.376983	0.16327	0.0408219	0.445009	0.0112467	-0.0538681	-0.150759	0.0124492	0.180317	-0.133424	0.145419	-0.0667057	0.0719579	-0.100503	0.155704	0.196501	-0.121624	-0.198422	-0.239095	-0.0427903	-0.102682	-0.321508	-0.122981
BHLHE40-AS1	0.173482	0.148496	-0.0134568	0.268821	0.200286	0.0165691	-0.0502197	0.0621372	0.435073	0.228849	0.288632	-0.0113392	0.0205616	-0.231196	0.195014	-0.125804	0.0361847	0.0140757	-0.160206	-0.0320818	0.032785	0.0643036	-0.0141541	-0.0173003	-0.0376646	0.0454615	0.0864539	0.22374
BHLHE41	-0.278241	-0.115566	-0.199565	0.137212	-0.255462	-0.231676	0.43221	-0.114163	-0.64457	-0.0937121	-0.0334761	-0.254476	-0.325422	-0.113057	-0.081598	0.18891	0.194125	0.0729237	0.148361	0.0384229	0.00804843	-0.203382	-0.0248861	0.0836725	0.0958666	0.411385	0.344133	0.447487
BHMT	0.122034	0.0423412	-0.00223315	0.0708585	0.115258	0.162508	0.108325	-0.197916	-0.06318	0.0703143	-0.122452	-0.111703	-0.232922	-0.123476	-0.155522	-0.0417204	-0.128927	-0.0214905	-0.0376603	-0.0983268	-0.237973	-0.0470848	-0.0199493	0.00487537	-0.148814	-0.06775	-0.436795	-0.201783
BHMT2	0.585335	0.934254	0.869759	0.598679	0.828944	0.873272	0.542461	0.472635	0.730843	0.951114	0.858257	0.714613	0.925681	1.30916	0.926252	1.11053	1.14173	1.22012	0.976422	1.26811	1.33668	0.962406	1.08903	1.36783	1.11441	0.969932	0.726805	0.555784
BICC1	0.133956	0.122248	0.0805772	0.119339	0.0425152	0.187243	0.129773	0.170278	0.0722142	0.0928107	-0.258713	-0.205965	0.119334	0.0688198	0.128212	0.0793606	0.160664	0.086549	-0.0396332	0.0991258	-0.106958	-0.209864	-0.0971696	-0.0276093	-0.0450394	-0.0723049	-0.0994945	0.064565
BICD1	-0.107052	0.00304966	-0.0487456	-0.155858	-0.159147	-0.0242203	-0.116032	-0.126841	0.00771421	0.0273643	-0.149101	-0.0339338	-0.128939	-0.151455	-0.075337	0.0696824	-0.0113588	-0.0992871	-0.148534	-0.0133776	-0.133406	0.000774146	-0.0637312	0.151022	0.00994646	0.0592307	0.0254508	0.0553041
BICD2	-0.894189	-0.436358	-0.363538	-0.72733	-0.872052	-0.543905	-0.121973	-0.354158	-0.598994	-0.369268	-0.273558	-0.564664	-0.406913	-0.182713	-0.339148	-0.00685298	-0.230499	-0.0990227	0.00806385	-0.281294	0.0432358	-0.250184	0.00142973	-0.203926	-0.117221	-0.119508	-0.20373	-0.159127
BICDL1	0.101226	0.0483743	0.0717263	-0.100524	0.182372	0.00716901	0.0797615	0.107544	0.0126495	-0.0483794	-0.0233758	-0.127828	-0.139853	-0.13207	-0.0308167	-0.0750576	-0.162155	-0.160107	-0.045084	0.0141742	-0.0259714	-0.0370341	0.0745241	0.00101502	0.0599655	0.161026	-0.067949	-0.00735122
BICDL2	0.591005	0.318935	0.545984	0.905129	0.608824	0.370607	0.377675	0.440613	0.508488	0.521248	0.5278	0.613928	0.449697	0.59032	0.389827	0.417171	0.694809	0.544001	0.455939	0.39405	0.507567	0.398929	0.453441	0.726072	0.249698	0.418079	0.672199	0.487318
BID	-0.415008	-0.624166	-0.412176	-0.214351	-0.461228	-0.488481	-0.177454	-0.262484	-0.260666	-0.508413	-0.426546	-0.11884	-0.0228918	-0.274616	-0.329852	-0.436813	-0.211364	-0.190557	-0.38991	-0.388826	-0.195138	-0.108084	-0.166124	-0.15906	-0.154163	0.0582259	-0.120794	-0.369814
BIK	-0.0455829	0.113482	0.0765789	0.0786573	0.22016	-0.0119482	0.143027	0.0560139	0.15474	-0.0782991	0.0124475	-0.00857046	0.031524	-0.169702	-0.0417938	-0.00641108	-0.0956923	-0.0662552	-0.0286	-0.112344	-0.0561983	-0.0467833	-0.165487	0.134265	-0.0483451	-0.0770924	0.114138	0.0454858
BIN2	0.60963	0.201926	0.324778	0.637388	0.57166	0.717825	0.599878	0.694661	0.502763	0.609986	0.825391	0.539966	0.49319	0.883786	0.881493	0.949303	0.917198	0.813778	0.628907	0.757164	0.652562	0.730079	0.683039	1.07004	0.628064	0.539496	0.840735	0.572968
BIN3	-0.153934	-0.0979616	-0.0775127	-0.180032	-0.20613	-0.190536	-0.0941197	-0.171147	-0.191929	-0.0434113	-0.0717015	-0.0783008	-0.0359345	-0.0260418	0.0911075	0.0057593	0.00157857	-0.0919761	-0.0107191	-0.0914929	-0.170775	-0.142137	-0.0843611	-0.224527	0.0431083	-0.06947	-0.110807	-0.106985
BIRC3	-0.49364	-0.19982	-0.168694	-0.378934	-0.282595	-0.297681	-0.389384	-0.270639	-0.309345	-0.466689	-0.491788	-0.214912	-0.233638	-0.375888	-0.440998	-0.446076	-0.533632	-0.470053	-0.551653	-0.5034	-0.398727	-0.363728	-0.378711	-0.621143	-0.395913	-0.41535	-0.582802	-0.312963
BIRC5	-0.787962	-0.375159	-0.646363	-0.839829	-0.598861	-0.353626	-0.678907	-0.755527	-0.389375	-0.533583	-0.633876	-0.38248	-0.380157	-0.490861	-0.478368	-0.570177	-0.582144	-0.247933	-0.338505	-0.493771	-0.651363	-0.770561	-0.900028	-0.948561	-0.742263	-0.469907	-0.798738	-0.784651
BIRC6	-0.719975	-0.623928	-0.628666	-0.651982	-0.679441	-0.791208	-0.694105	-0.535827	-0.686277	-0.507313	-0.690756	-0.568581	-0.635816	-0.563537	-0.562922	-0.66887	-0.632011	-0.561637	-0.662387	-0.772146	-0.727413	-0.568235	-0.57517	-0.793024	-0.594025	-0.621976	-0.532852	-0.598892
BIRC7	0.326445	0.635393	0.589586	0.586388	0.633291	0.606364	0.305595	0.202418	0.465612	0.399763	0.283413	0.317874	0.242737	0.198973	-0.0957309	-0.027675	0.055377	0.125964	-0.0233299	0.0393985	0.0690337	0.196399	0.244942	0.0431187	0.00551388	-0.0480007	0.193328	0.197867
BIVM	0.595731	0.478411	0.616773	0.438645	0.540737	0.395113	0.266853	0.114151	0.851635	0.519822	0.581274	0.616257	0.422531	0.695835	0.173019	0.386122	0.288702	0.43655	0.215047	0.313287	0.361808	0.40579	0.296186	0.228094	0.131146	0.336374	0.363516	0.319503
BLCAP	-0.28973	-0.275096	-0.311206	-0.206646	-0.388378	-0.540324	-0.239635	-0.271123	-0.403919	-0.11816	-0.221616	-0.257061	-0.357163	0.0579381	-0.219069	-0.421447	-0.162702	-0.542723	-0.227904	-0.152751	-0.024314	0.0387117	-0.118196	0.0423297	0.0417824	0.184349	0.0253107	-0.0563401
BLK	0.0440158	-0.101826	-0.103092	-0.214558	0.0918955	-0.250631	-0.01165	-0.287858	-0.0242521	-0.0338669	-0.181112	0.0459084	-0.1678	-0.214952	0.0983374	0.0858396	0.132551	-0.0018524	-0.080764	0.00324127	-0.155684	-0.0909528	-0.0624242	0.0867484	-0.0164143	0.0568265	-0.132503	-0.0150439
BLM	0.0897342	0.133142	-0.111442	-0.230923	0.023103	-0.00891362	-0.393378	-0.3125	-0.088268	-0.079018	-0.201015	-0.18731	-0.126416	-0.242837	-0.319885	-0.228004	-0.356319	-0.127183	-0.330285	-0.376419	-0.185979	-0.150039	-0.213892	-0.225975	-0.18548	-0.222576	-0.188895	-0.289478
BLNK	0.396376	0.451963	0.388797	0.428555	0.583411	0.505928	0.286543	0.267948	0.422227	0.159039	0.353876	0.291151	0.371287	0.0510143	0.20329	0.148344	0.0627143	0.0943492	0.228593	0.11125	0.235919	0.125156	0.127776	-0.133628	0.166493	0.15896	0.0604448	-0.0391854
BLOC1S1	-0.0501705	-0.111087	0.103802	-0.121248	0.030003	-0.261314	-0.22411	0.10167	-0.232221	-0.381096	-0.384921	-0.505193	-0.445622	-0.350698	-0.282661	-0.224409	-0.370296	-0.346878	-0.34644	-0.141225	0.0276697	-0.229553	-0.207162	-0.392536	-0.0980669	-0.34922	-0.288755	-0.274478
BLOC1S2	-0.575446	-0.146466	-0.505262	-0.188698	-0.407756	-0.432072	-0.329478	-0.681238	-0.740894	-0.41542	-0.255726	-0.263939	-0.426909	-0.604365	-0.334189	-0.269093	-0.0820579	-0.310162	-0.0607282	-0.194206	-0.251685	-0.443546	-0.491949	-0.469368	-0.24092	-0.17936	-0.202995	-0.217687
BLOC1S3	-0.664829	-0.106686	-0.412815	-0.559158	-0.301081	-0.630469	-0.509316	-0.38099	-0.776483	-0.247365	-0.258675	-0.356891	-0.255985	-0.235018	-0.0758151	-0.00924098	-0.0515476	-0.135066	-0.135807	-0.176951	0.0825187	0.21604	-0.352881	-0.0945715	0.00593508	-0.454672	-0.276774	-0.0967843
BLOC1S6	-0.795708	-0.573497	-1.32639	-0.881097	-1.10084	-1.03259	-0.503449	-0.544353	-1.25725	-0.887178	-0.986144	-0.616427	-0.937271	-0.397716	-0.912405	-0.79396	-0.598116	-0.458225	-0.325331	-0.445013	-0.805413	-0.756504	-0.653566	-0.761734	-0.587018	-0.664862	-0.78113	-0.797887
BLVRA	-0.165918	-0.187097	0.099894	-0.246941	-0.0155134	0.0316382	-0.0170268	0.0502259	0.279277	-0.0627483	-0.386343	0.21751	0.183296	0.137942	-0.0543308	0.0553299	0.0410886	0.088796	-0.072627	0.0789702	0.359315	0.130381	-0.0905776	0.0926697	0.368685	0.0581746	-0.110853	-0.0723174
BLVRB	-0.47421	-0.592417	-0.497977	-0.566215	-0.619603	-0.371348	-0.488484	-0.386612	-0.493675	-0.428027	-0.51098	-0.439492	-0.540778	-0.279344	-0.275394	-0.311149	-0.294307	-0.342588	-0.325918	-0.32356	-0.476267	-0.286595	-0.501813	-0.537435	-0.466595	-0.535079	-0.554346	-0.665151
BLZF1	0.123084	0.16493	0.257558	0.0380532	0.174206	0.191317	0.126789	0.0181605	0.166915	0.0918424	0.174321	0.196892	0.186429	-0.0118838	0.00845842	0.0747847	0.106043	0.126679	0.0601663	0.00807338	0.0523732	0.20338	-0.0157437	0.158209	0.0561887	0.168708	0.114785	0.221177
BMF	-3.44054	-3.32406	-3.44892	-3.48132	-3.03312	-3.33892	-3.70022	-3.19008	-3.46567	-3.37255	-3.50377	-3.24692	-3.67673	-3.35291	-3.21592	-3.32717	-3.34263	-3.06854	-3.23897	-3.39473	-4.2844	-4.16181	-4.19459	-3.89394	-3.55157	-3.95846	-4.21053	-1.69851
BMI1	-0.440665	-0.306475	-0.228889	-0.469305	-0.351226	-0.328716	-0.375515	-0.112985	-0.412553	-0.351837	-0.233867	-0.34571	-0.418668	-0.294419	-0.2419	-0.21554	-0.0436155	-0.169892	-0.265442	-0.294531	-0.185743	-0.354796	-0.277218	-0.30242	-0.177483	-0.222324	-0.239948	-0.163782
BMP1	0.196239	0.229638	-0.0375882	0.290021	0.0598851	0.170682	0.145747	0.0686688	0.341225	0.228537	0.0577321	0.286002	0.44886	0.362553	0.199612	0.303564	0.313535	0.17951	0.0419467	-0.0823671	0.298207	0.140314	0.139967	0.28299	0.36624	0.193146	0.13276	-0.152403
BMP2	0.296822	-0.0746047	-0.0912408	-0.293738	-0.355711	-0.563514	0.0134083	-0.668347	0.0174476	-0.058731	-0.56871	-0.109424	-0.402661	-0.158093	0.221702	-0.553768	0.0559209	0.0180767	-0.019494	-0.685532	-0.300411	-0.451187	-0.380012	-0.113441	-0.0947457	-0.421511	-0.173106	-0.514613
BMP2K	0.0695778	-0.0579108	0.0624132	0.0394133	-0.00964551	0.0210526	-0.0267562	0.15136	0.0442891	-0.0827197	-0.0561495	-0.079164	0.0416705	-0.0213609	-0.00781039	-0.0163954	0.0114455	0.0401714	-0.0487396	-0.112816	-0.0029122	-0.057689	-0.0324262	-0.217921	0.0154099	-0.00805175	0.0535944	0.042756
BMP4	0.179278	0.0508298	0.0618218	0.0751298	0.177407	0.537838	0.0961228	0.264076	0.279979	0.294993	0.428983	0.389185	0.312726	0.281924	0.0575166	0.227361	0.14107	0.163282	0.26116	0.25758	0.0896634	0.314398	0.237828	0.468961	0.104997	0.226315	0.328107	0.217551
BMP6	-0.440244	-0.41219	-0.503259	-0.404696	-0.305718	-0.364131	-0.536916	-0.205742	-0.470887	-0.286806	-0.475594	-0.396849	-0.206035	-0.366666	-0.458024	-0.241493	-0.225916	-0.122841	-0.403241	-0.304199	-0.0604682	-0.214614	-0.289002	-0.194345	-0.246469	-0.236924	-0.35823	-0.283623
BMP7-AS1	0.217227	0.338204	0.353168	-0.0501154	0.505272	0.317224	0.0937303	0.0502357	-0.130572	0.235561	0.339262	0.245147	0.0737862	0.282539	-0.0583855	0.173794	0.290126	0.103945	0.110652	-0.0280817	0.217134	0.168042	0.190292	0.29011	0.14751	0.0333789	0.359754	0.314374
BMP8A	-0.321682	-0.442491	-0.414286	-0.386088	-0.408462	-0.255423	-0.406793	-0.292913	-0.178425	-0.277021	-0.311286	-0.23484	-0.327216	-0.161691	-0.208262	-0.456976	-0.218526	-0.266347	-0.419088	-0.453205	-0.5231	-0.428218	-0.472492	-0.339042	-0.247572	-0.53983	-0.657997	-0.393528
BMPER	-0.259517	0.245394	0.192392	0.275344	0.111698	0.462777	0.207821	-0.0681482	0.0462924	0.00526173	-0.114701	-0.127648	0.108498	0.00447642	0.302924	0.197374	-0.113298	0.0482364	0.385637	0.0379841	0.036692	0.149786	0.423135	-0.0210245	0.0951505	0.0898317	0.259344	0.227808
BMPR1A	0.153434	0.207772	0.291705	0.212467	0.093352	-0.0087757	0.160176	0.0316785	0.0902284	0.181431	0.380058	0.0979311	0.154409	-0.0559621	0.0367034	0.11918	0.0448642	-0.0527394	0.0144672	0.0708734	-0.080128	-0.0810863	-0.0393055	0.123342	-0.193044	0.0229241	-0.0815475	0.0362436
BMPR1B	-1.06674	-0.685275	-0.58526	-0.732511	-0.72074	-0.762336	-0.695431	-0.473737	-0.705479	-0.518007	-0.708311	-0.477354	-0.86965	-0.32047	-0.764507	-0.896267	-0.647611	-0.57971	-0.714581	-0.903414	-0.693512	-0.603872	-0.582344	-0.756321	-0.478099	-0.691069	-0.59042	-0.563668
BMPR2	-0.925114	-0.900117	-1.01437	-0.801993	-0.888675	-0.811318	-0.837313	-0.569112	-0.87253	-0.709181	-0.841281	-0.809327	-0.736155	-0.381242	-0.492702	-0.961769	-0.693688	-0.757618	-0.82484	-0.810195	-0.675689	-0.550952	-0.546391	-0.572145	-0.504821	-0.609277	-0.595999	-0.54566
BMS1	-0.691549	-0.461453	-0.659105	-0.663554	-1.00717	-0.796809	-0.582081	-0.607322	-0.693432	-0.434921	-0.469258	-0.527062	-0.590678	-0.5616	-0.514436	-0.395194	-0.436663	-0.510261	-0.45777	-0.47298	-0.405484	-0.337332	-0.363898	-0.280754	-0.395563	-0.294317	-0.243461	-0.411969
BMS1P21	0.0660215	0.00707976	0.333607	0.116049	0.255797	0.405703	0.0666697	0.00409261	0.12682	-0.127208	0.204615	-0.0639448	0.0350909	-0.0620784	0.198018	0.248376	0.0651825	-0.0232734	0.0449085	0.124584	-0.0887933	-0.259615	0.0155909	0.5983	0.200808	0.0319132	0.106829	0.173895
BMT2	-0.0924172	0.0552693	-0.115812	0.0180585	0.2113	-0.173178	-0.0382994	-0.101817	-0.279387	-0.171329	-0.116723	-0.0471008	-0.175074	-0.261509	-0.0381133	-0.120057	-0.104885	-0.0570655	-0.125698	0.125887	-0.179661	-0.241632	-0.138132	-0.474857	-0.0283924	-0.095034	-0.253546	-0.384549
BMX	-0.0941339	-0.305406	-0.0410413	-0.0264945	-0.334922	-0.434359	-0.0470968	0.0561219	-0.165824	-0.185714	-0.344725	-0.0588547	0.0177096	-0.210571	-0.0340705	0.115667	-0.0615631	-0.188545	0.337357	-0.283126	-0.0912664	-0.139679	0.118204	0.0294775	-0.104808	0.114129	0.179565	-0.228626
BNC2	-0.408924	-0.445634	-0.449528	-0.469884	-0.424336	-0.34097	-0.420396	-0.351136	-0.39692	-0.327843	-0.393995	-0.351455	-0.432498	-0.369416	-0.325176	-0.382392	-0.374264	-0.391492	-0.377178	-0.291717	-0.292719	-0.277107	-0.451034	-0.488306	-0.248273	-0.290559	-0.40606	-0.382677
BNIP1	0.101881	-0.0365988	0.138979	0.196353	-0.0109761	0.18394	0.10223	0.172752	0.112506	0.0590982	0.093374	0.0244758	-0.159634	0.115393	0.121866	0.131081	0.0702259	0.0980365	0.132563	-0.00939504	0.0996522	-0.0100126	0.193075	-0.0312907	0.0891963	-0.092264	0.263075	0.0735452
BNIP2	-0.665801	-0.274983	-0.589135	-0.770902	-0.581967	-0.804786	-0.23084	-0.376906	-0.787961	-0.427007	-0.48945	-0.413385	-0.356374	-0.182041	-0.22707	-0.343707	-0.201198	-0.512113	-0.308216	-0.290656	-0.294989	-0.282993	-0.296194	-0.0715366	-0.074411	-0.0944979	-0.0941352	0.00829157
BNIP3	-0.737981	-1.24713	-0.954291	-0.510516	-0.604219	-0.884391	-1.54524	-1.44066	-0.73168	-1.0133	-0.746355	-0.525626	-0.703672	-0.914004	-0.64909	-0.626567	-0.0638996	-0.0644822	-0.516603	-0.437191	-0.116079	-0.57337	0.215746	-0.502417	-0.325296	-0.807803	-0.402372	-0.152008
BNIP3L	-0.59144	-0.438349	-0.379525	-0.41486	-0.461519	-0.252482	-0.570783	-0.185956	-0.588142	-0.197683	-0.444354	-0.197855	-0.532743	-0.348346	-0.372199	-0.24209	-0.324709	-0.369517	-0.341479	-0.203844	-0.353578	-0.466281	-0.286972	-0.45436	-0.563118	-0.377156	-0.519893	-0.464843
BNIPL	-0.617247	-0.47415	-0.462472	-0.406041	-0.413083	-0.383951	-0.370177	-0.278136	-0.333089	-0.336855	-0.380039	-0.483866	-0.438241	-0.383436	-0.370907	-0.585809	-0.384653	-0.513702	-0.616862	-0.58601	-0.411536	-0.324766	-0.415947	-0.433888	-0.436984	-0.513574	-0.608698	-0.377709
BOC	-0.304597	-0.386558	-0.435837	-0.28997	-0.296225	-0.293809	-0.31578	-0.161452	-0.222494	-0.231492	-0.243864	-0.217694	-0.168517	0.0115957	-0.166479	0.0198678	-0.121409	-0.25792	-0.164511	-0.177879	-0.00938161	0.0441695	-0.0524397	-0.110829	0.0147317	0.0292708	0.0371528	-0.0655542
BOD1	-0.569203	-0.657014	-0.418577	-0.495531	-0.804387	-0.57896	-0.333067	-0.567232	-0.528633	-0.360489	-0.314873	-0.37101	-0.189028	-0.503861	-0.379274	-0.36938	-0.256188	-0.324007	-0.296999	-0.42255	-0.27161	-0.441654	-0.320127	0.126639	-0.268008	-0.166731	-0.122169	-0.179388
BOLA2-SMG1P6	-1.69897	-0.93365	-1.36376	-1.09906	-1.45577	-1.56734	-1.29633	-1.25828	-1.67131	-1.35148	-1.64847	-1.4356	-1.1692	-1.27408	-0.946339	-1.00917	-0.662106	-1.37022	-1.08906	-1.21605	-1.43337	-0.976054	-1.27875	-0.90702	-1.08067	-1.16774	-1.0212	-1.14405
BOLA3	-0.475375	-0.701839	-0.610016	-0.424854	-0.65103	-0.789666	-1.01759	-0.547909	-0.801665	-0.59135	-0.573014	-0.665757	-0.74535	-0.622411	-0.491142	-0.712365	-0.449024	-0.558361	-0.526682	-0.555466	-0.882367	-0.648502	-0.824301	-0.453938	-0.883737	-0.914789	-0.717622	-0.594164
BOLL	0.370855	0.255455	0.141346	0.162191	0.156124	0.221911	0.197317	0.270327	0.285847	0.233446	0.0716746	0.10229	0.165542	-0.128344	0.0535374	0.0667135	0.207323	-0.103328	0.0812994	0.133764	0.115501	-0.107851	0.369291	0.00638585	-0.0353913	-0.0245651	0.223413	0.173594
BOP1	0.251076	0.222866	0.142307	-0.086265	0.0900485	0.102935	-0.215547	0.17065	-0.0112304	-0.185872	-0.00587079	-0.528827	0.0135525	-0.374374	-0.0151776	-0.263626	-0.220245	-0.164312	0.0454269	0.233734	0.10022	-0.0355364	0.320338	0.0376745	-0.0188582	0.152771	0.168629	0.224063
BORA	-0.125302	-0.250735	0.101704	-0.0505788	-0.0294896	0.0100232	-0.184509	-0.0454124	-0.0505174	-0.243522	-0.126837	-0.153043	-0.221844	-0.206109	-0.139832	-0.117937	-0.166777	-0.217401	-0.232258	0.0435722	-0.063419	-0.166965	-0.248003	-0.20114	-0.125113	-0.0586297	-0.181016	-0.200272
BORCS6	-0.228294	-0.223629	-0.246288	-0.307354	-0.29005	-0.27211	-0.220411	-0.206876	-0.224876	-0.38746	-0.0740312	-0.14051	-0.280258	-1.9064e-05	-0.143164	-0.198782	-0.116421	-0.18888	-0.253166	-0.0397009	-0.0639078	-0.249319	-0.269892	-0.149791	-0.16741	-0.304097	-0.294313	-0.156928
BORCS7	-0.811079	-0.707062	-0.829791	-0.888586	-1.06924	-1.38653	-1.12095	-0.697343	-1.03184	-0.796274	-1.13658	-0.892743	-0.974823	-0.950155	-0.850231	-0.994133	-0.890431	-0.673072	-0.9715	-1.1376	-1.14626	-0.894032	-1.08899	-1.2805	-1.08281	-0.972156	-0.524046	-0.969254
BORCS8-MEF2B	-2.88304	-2.44648	-2.39061	-2.15605	-2.78638	-2.64785	-1.69088	-2.46209	-2.35899	-2.26121	-1.95552	-2.50537	-2.21463	-2.67311	-2.19411	-2.35873	-1.62783	-2.17578	-2.19877	-2.1796	-2.12763	-2.60839	-2.22468	-2.09982	-2.20573	-1.98018	-2.2345	-1.43286
BPESC1	0.264318	0.16804	0.395194	0.131557	0.142523	0.405811	0.550222	0.115661	0.30532	0.195569	0.345586	0.426847	0.375717	0.321044	0.0805312	0.311817	0.299432	0.222379	0.27827	0.18945	0.0877004	0.229722	0.101828	0.2336	0.123882	0.177911	-0.0315682	0.333797
BPGM	-0.122713	-0.132838	-0.114455	-0.168789	-0.121262	-0.0929664	-0.0454071	0.040003	-0.118957	-0.18429	-0.234758	-0.174352	-0.0874265	-0.156973	-0.072209	-0.205381	-0.188555	-0.0454831	-0.269788	0.0527853	-0.0429659	-0.208766	-0.0126376	-0.158126	-0.210495	-0.119945	-0.144033	0.0484125
BPHL	0.398102	0.306421	0.0910301	0.529333	0.411431	0.588121	0.566031	0.281607	0.568874	0.243814	0.565274	0.183702	0.316303	0.566128	0.272644	0.521589	0.542143	0.417246	0.466657	0.28022	0.451098	0.375784	0.331899	0.189233	0.142818	0.303174	0.216535	0.45754
BPI	-0.334154	-0.0861686	0.00474322	-0.0783844	-0.0917939	-0.0531152	-0.0259174	0.200863	-0.260834	-0.169407	-0.0820537	-0.0954858	-0.201953	-0.128136	-0.269945	-0.059122	-0.155769	-0.159298	0.093203	0.17366	-0.0144828	-0.233403	-0.217328	-0.103236	-0.0750227	-0.0387282	-0.0714907	0.0644024
BPIFA1	0.0253031	0.105395	0.275189	0.0257926	0.0474024	0.0789668	-0.0385156	0.0138163	-0.107367	-0.0263256	-0.0759196	0.0314877	-0.137965	-0.0904575	-0.069253	-0.151409	-0.227565	-0.0689303	0.236365	-0.226978	-0.0101016	-0.145699	-0.10806	-0.217962	-0.14795	-0.146894	-0.160585	-0.25372
BPIFA3	0.416057	0.347759	0.478493	0.459253	0.291908	0.230591	0.696425	0.0306746	0.381364	0.376342	0.174427	0.43386	0.502374	0.247169	0.205395	0.336751	0.159301	-0.00292415	0.310295	0.234294	0.283852	0.22496	0.324511	0.631542	-0.0459875	0.357016	0.303571	0.328122
BPIFB1	0.32903	0.188737	0.339945	0.328189	0.194541	0.19581	0.31554	0.402934	0.029421	0.165414	0.088391	0.0486936	0.178285	-0.0757259	0.0967171	0.0906744	0.0318831	-0.0891779	-0.0644169	0.178438	0.143325	-0.397602	0.156904	-0.0127802	-0.0378919	-0.102179	0.0523568	0.0460843
BPIFB2	-0.0344766	-0.184099	-0.319358	-0.371724	-0.0976457	-0.325769	-0.504228	-0.387929	-0.473933	-0.410587	-0.218654	-0.32356	-0.258237	-0.236037	-0.384163	-0.220141	-0.374066	-0.179134	-0.382303	-0.310462	-0.25019	-0.246865	-0.0406713	-0.150334	-0.0506626	0.0192133	-0.309012	-0.341471
BPNT1	-0.745809	-0.626785	-0.593889	-0.683279	-0.324528	-0.666893	-0.322348	-0.844936	-0.468231	-0.327359	-0.195934	-0.299905	-0.268274	-0.383729	-0.533608	-0.75828	-0.534052	-0.473307	-0.583768	-0.67495	-0.754787	-0.696134	-0.665838	-0.897456	-0.487935	-0.795372	-0.86279	-0.717485
BPTF	-0.100962	0.0161691	0.0192261	-0.129504	0.104574	0.0186478	-0.0192919	-0.191623	0.0331142	0.080481	-0.018821	0.0388572	0.0499842	-0.0854445	0.101076	0.0625679	0.0791287	0.0559991	0.126769	0.0207852	0.0716074	0.100702	-0.105105	0.0758202	0.064412	0.048463	-0.0072321	-0.0191307
BRAF	-0.880338	-0.377906	-0.455213	-0.433341	-0.500822	-0.568026	-0.542551	-0.20936	-0.502295	-0.406298	-0.486046	-0.286448	-0.340905	-0.48336	-0.336044	-0.503176	-0.411584	-0.422888	-0.426945	-0.512593	-0.324794	-0.225518	-0.242756	-0.358154	-0.239641	-0.234727	-0.169661	-0.320072
BRAP	-0.903063	-0.647586	-0.662849	0.149489	-0.646184	-1.09363	-0.395541	-0.69624	-0.474006	-0.826734	-0.85277	-0.677753	-0.317459	-0.531946	-0.415692	-0.723033	-0.16481	-0.406241	-0.359221	-0.612979	-0.451204	-0.213002	-0.774883	-0.260382	-0.377666	-0.47702	-0.27531	-0.358021
BRAT1	-0.263574	-0.145896	-0.100387	0.0466036	-0.0739686	-0.07203	-0.0388339	-0.0921819	-0.158389	-0.119222	-0.0442924	0.0372373	-0.104958	-0.145384	0.0453833	-0.0579737	-0.254564	0.0743464	-0.0459849	-0.0739366	-0.186452	-0.162049	-0.170895	0.0292694	0.0913588	0.043927	-0.0228366	0.02163
BRCA2	-0.873897	-0.822875	-1.06822	-0.965705	-0.860135	-1.09731	-0.971076	-0.955482	-1.00616	-1.07896	-1.00364	-0.8155	-0.799965	-0.746616	-0.556116	-0.723143	-0.820965	-0.700685	-0.859164	-0.633494	-0.736141	-0.628266	-0.768912	-0.56641	-0.600927	-0.467571	-0.808631	-0.819284
BRCC3	-0.485456	-0.234552	-0.692753	-0.672458	-0.581302	-0.85789	-0.00197028	-0.786919	-0.621447	-0.479103	-0.269003	-0.704447	-0.225026	-0.560124	-0.454702	-0.618563	-0.690886	-0.469302	-0.428009	-0.882162	-0.473995	-0.294175	-0.468153	-0.556102	-0.557676	-0.424311	-0.435294	-0.622401
BRD2	0.730113	0.437637	0.522387	0.612175	0.585711	0.65713	0.733318	0.588833	0.714318	0.51155	0.685185	0.695518	0.619605	0.549455	0.503583	0.409954	0.398502	0.330808	0.359723	0.391683	0.333858	0.353124	0.546175	0.979815	0.564322	0.651574	0.474595	0.419825
BRD3	-0.395852	-0.489126	-0.595223	-0.39432	-0.427039	-0.283889	-0.39729	-0.30886	-0.421435	-0.402202	-0.346668	-0.34853	-0.257417	-0.24798	-0.160663	-0.24028	-0.173443	-0.152449	-0.117041	-0.132134	-0.187566	-0.218102	0.0309006	-0.17028	-0.135513	-0.241434	-0.206459	-0.0538538
BRD4	0.0180381	0.126635	-0.0618467	0.221986	0.011959	0.113526	0.07188	0.251972	0.349495	0.274456	0.29255	0.317779	0.189159	0.407827	0.249666	0.20217	0.390248	0.379917	0.449346	0.189068	0.351595	0.0587941	0.263226	0.164007	0.414807	0.572393	0.0122657	0.32793
BRD7	-0.695485	-0.846332	-0.82546	-0.696717	-1.21053	-0.990876	-0.721202	-0.55797	-0.776835	-0.667401	-0.594127	-0.650748	-0.6527	-0.793296	-0.50288	-0.28421	-0.541302	-0.212415	-0.460911	-0.34723	-0.485793	-0.568468	-0.506292	-0.484948	-0.231232	-0.327201	-0.369065	-0.374162
BRD8	-0.579307	-0.526766	-0.451551	-0.483741	-0.380373	-0.421417	-0.483284	-0.424812	-0.54882	-0.57865	-0.490076	-0.422627	-0.518366	-0.489596	-0.417817	-0.513518	-0.481277	-0.484107	-0.532085	-0.653848	-0.634031	-0.516367	-0.654004	-0.653454	-0.574856	-0.554322	-0.717274	-0.565776
BRDT	0.00414074	0.0693874	0.0946899	-0.0111479	0.0561052	0.200339	-0.0130148	-0.0532073	-0.0481136	-0.150272	0.0296234	-0.0431086	-0.023733	0.0560011	0.0155267	-0.108507	-0.105444	-0.0850985	-0.0581111	0.0114201	-0.256746	0.0756677	-0.00157809	-0.0170147	-0.0209893	0.0186346	-0.0899621	-0.0343761
BRE	-0.148507	-0.105534	-0.050249	-0.0530489	0.00831444	-0.0166354	0.0139222	-0.036223	-0.0113785	-0.0940313	-0.082177	-0.0844499	-0.103638	-0.0292579	0.0223137	-0.0190394	0.0106864	-0.0676452	-0.0229541	-0.0113938	-0.0259504	-0.0110238	-0.0587606	-0.0311969	-0.108137	-0.056558	0.0309353	-0.0404979
BRI3	0.117555	0.052118	0.516879	0.218981	0.206128	0.192552	0.274838	0.100279	0.390168	0.187433	0.343767	0.130778	0.125835	0.351067	-0.0216835	0.146205	0.182551	0.00266596	0.116024	0.0363285	0.224433	0.286469	0.030502	0.269855	0.149011	0.300369	0.0572049	0.15173
BRINP1	-0.33231	0.240275	0.116716	0.0688535	0.0716388	0.160628	-0.22356	-0.0637123	0.253064	0.121358	0.244066	0.0804702	0.0115387	0.00900006	0.0193377	0.0620599	0.00852494	-0.0753779	0.103931	0.185204	-0.122698	0.0646972	0.134437	-0.0902145	-0.0811219	0.175377	-0.028874	0.135701
BRINP2	-0.16075	-0.264531	-0.545829	-0.139232	-0.2689	-0.321129	-0.277423	-0.323793	-0.369647	-0.28692	-0.10136	-0.385726	-0.22583	-0.0562578	-0.114501	-0.083775	-0.211595	-0.153399	-0.0874669	-0.168261	-0.0509546	-0.0492228	0.0297259	0.0107343	0.017338	-0.123644	0.119919	-0.0150799
BRINP3	-0.00294579	-0.00453291	-0.0312558	-0.0123377	-0.135071	-0.123435	-0.151963	0.234602	-0.110499	-0.134007	-0.271216	-0.109509	-0.0599231	-0.134928	-0.111187	-0.0419872	-0.241703	-0.158534	-0.143891	0.0377711	0.092454	0.0541824	-0.0699187	-0.177997	-0.0438278	0.0852107	-0.0406881	-0.0944881
BRIP1	-1.33262	0.203708	0.163466	0.335376	-0.630237	-1.26611	-0.945453	-1.31443	-1.34146	-0.870077	-1.53978	-1.25852	-1.14959	-0.147304	-1.19759	-1.58395	-1.34172	-1.48198	-1.30051	-1.69555	-1.2013	-1.24728	-1.53017	-1.64752	-1.07312	-1.1509	-1.09843	-1.22924
BRK1	0.108851	0.123699	0.308063	0.315567	0.393203	0.195885	0.0296718	0.10024	0.0118893	0.0818973	-0.00153111	0.058241	0.0110995	-0.192936	-0.163952	-0.154531	-0.0390379	-0.101736	-0.247955	-0.225226	-0.0306398	-0.032012	-0.0653941	0.029136	-0.0856784	0.037225	-0.112569	-0.0741573
BRMS1	0.201426	-0.057942	0.108941	0.067806	0.027466	0.0484112	0.137931	0.142797	-0.0118499	0.298938	0.224664	0.151904	0.253608	0.210225	0.237113	0.0623106	0.117043	0.0606521	0.195792	0.159457	0.0964861	0.133587	0.0865912	-0.0208798	0.169427	0.224332	0.545893	0.271602
BRMS1L	0.306034	0.248722	0.170671	0.1753	0.107236	0.0844717	0.166214	0.280433	0.210413	0.0775085	0.253662	0.181379	0.141642	0.0735144	0.0137315	0.0181934	0.0642266	0.174485	0.137933	-0.104112	0.111945	-0.0192256	0.0132211	0.000662663	0.0213669	0.128551	0.22974	0.231644
BROX	-0.600313	-0.565643	-0.613486	-0.535463	-1.15139	-0.820669	-0.559048	-0.690309	-0.511699	-0.337879	-0.590606	-0.602608	-0.367506	-0.283009	-0.378011	-0.47937	-0.275809	-0.353045	-0.319684	-0.183559	-0.199986	-0.459904	-0.346821	-0.104609	-0.398187	-0.33998	-0.355141	-0.19471
BRPF1	-0.394874	-0.19218	-0.0444494	-0.0225806	-0.333792	-0.265692	-0.178796	-0.185516	-0.0573815	0.0197866	0.0496782	-0.0836472	-0.0947846	-0.17425	-0.105872	-0.155205	-0.236689	-0.0320865	-0.171699	-0.157605	-0.0832574	-0.0569368	-0.0199145	-0.198912	-0.17708	-0.022419	-0.0530297	0.096882
BRPF3	0.0353251	0.0894183	-0.050427	0.107895	0.000689136	-0.0834298	0.00464782	-0.149964	0.0472338	0.00814071	0.0670729	0.0285902	-0.0485665	0.0269949	-0.150436	0.081106	-0.0684474	-0.0438079	0.109779	0.218654	0.0192338	0.0326798	0.00774993	-0.0732803	0.0379672	0.0240305	0.0364646	-0.0192034
BRS3	0.0185093	-0.0876505	0.264905	0.179957	0.139719	0.125543	-0.0336443	0.175879	-0.0175702	0.0129261	0.314059	0.191244	-0.0764821	0.0618177	-0.0072164	0.0440112	0.0103752	0.0338854	0.080169	0.292203	0.131671	0.0973046	0.0985044	0.312734	0.028727	-0.0669882	0.0885083	-0.129636
BRSK1	0.0333482	-0.150984	-0.231325	-0.150842	-0.166148	0.0135404	0.170451	0.00150216	-0.0425997	-0.157811	-0.0831513	-0.147098	0.135348	0.294359	-0.163926	0.0571684	0.155375	-0.247845	-0.130925	0.257009	0.106471	0.108786	0.153194	0.0559663	0.0858134	-0.0679574	0.108328	-0.206214
BRWD1	-0.0734191	0.00327863	0.0527419	-0.0225369	-0.0226071	-0.104037	-0.0755943	0.0413165	-0.0804001	-0.048372	0.014412	-0.151274	-0.100694	-0.11558	0.0682431	-0.0660389	-0.112285	-0.0946964	-0.0508454	-0.0870706	-0.11025	-0.101715	-0.175364	-0.0953849	-0.156348	-0.143709	0.00568219	-0.147785
BRWD1-IT2	-0.783331	-0.657897	-1.01524	-0.801178	-0.372975	-0.767991	-0.777425	-0.529645	-0.953854	-0.771241	-0.926008	-0.654793	-0.605126	-0.189922	-0.463205	-0.53642	-0.763323	-0.706104	-0.987634	-0.543597	-1.09849	-0.487335	-0.808871	-0.831178	-0.489105	-0.577859	-0.593079	-0.734966
BRWD3	-0.0466483	-0.0170127	-0.0205623	-0.00810873	0.0205221	0.177331	0.0436514	0.127281	0.0723682	0.0193631	-0.00899576	-0.0378435	-0.0513714	0.130549	0.0225017	0.172724	-0.0854064	0.0304723	0.0119941	0.0364127	0.0691925	-0.0850089	0.0484787	0.0642098	0.0199508	-0.168016	0.0248229	-0.0297848
BSCL2	-0.217582	-0.218185	-0.307895	-0.239027	-0.463843	-0.61438	-0.210159	-0.36966	-0.556718	-0.316158	-0.469247	-0.59456	-0.200636	-0.845998	-0.635536	-0.521409	-0.378804	-0.632961	-0.587682	-0.373093	-0.441762	-0.290542	-0.874758	-0.405282	-0.147746	-0.237095	-0.184697	-0.336016
BSG	0.255112	0.132369	-0.0476837	0.14829	0.178339	0.125275	0.264119	0.13235	-0.00204041	0.206497	0.0873657	0.174573	-0.0150239	0.0919202	0.0684725	0.09758	0.0468037	-0.00597828	0.059776	0.0712251	0.171793	0.117747	0.114033	0.266261	0.00636027	0.0889471	0.0426623	0.113277
BSND	0.309021	0.331133	0.370023	0.207646	0.364873	0.221949	0.241808	-0.073656	0.372693	-0.0664343	0.379992	0.145892	0.247127	-0.156552	-0.103047	0.309436	0.144048	-0.137365	0.441559	0.236902	0.324536	0.111339	0.19579	0.194239	0.0967348	0.30437	0.0996403	0.331801
BSPRY	0.197713	0.32489	0.351409	0.375078	0.549653	0.478331	0.342834	0.169113	0.319029	0.301793	0.207314	0.221851	0.159353	0.189685	0.220615	0.142332	0.092923	0.138321	0.290142	0.259704	0.237936	0.150428	0.217578	0.170888	0.152619	0.181647	0.219545	0.0847549
BST1	0.258541	0.306233	0.181492	0.147964	0.0374618	0.19394	0.0836163	0.26896	0.474313	0.295345	0.262475	0.317593	0.402645	0.243132	0.264465	0.144735	0.242612	0.000682167	0.134959	0.0623743	0.193874	0.375825	0.143821	0.420761	0.2354	0.167676	0.256267	0.379534
BST2	0.297507	0.18192	0.37167	0.159168	0.21697	0.582139	0.404616	0.388705	0.422974	0.381905	0.272956	0.602308	0.195253	0.520156	0.112674	0.304613	0.244999	0.174922	0.261876	0.422245	0.0686679	0.0645419	0.223842	0.301334	0.0518111	0.204625	0.191663	0.0761909
BTBD1	-0.656413	-0.435792	-0.67316	-0.453614	-0.249719	-0.881186	-0.741059	-0.345638	-1.05328	-0.351007	-1.08787	-0.372254	-0.453343	-0.48217	-0.668678	-0.914231	-0.550266	-0.41035	-0.367034	-0.53376	-0.799699	-0.53582	-0.744026	-0.131601	-0.685264	-0.64414	-0.146146	-0.0794673
BTBD2	-0.157361	-0.177901	-0.178529	-0.146968	-0.251795	-0.258328	0.622341	0.0598228	-0.244582	-0.320861	-0.00485073	-0.365975	-0.00396208	-0.0524637	-0.249311	-0.31169	-0.0414589	-0.0628711	0.188791	-0.0768532	-0.0934826	-0.124823	-0.0822077	-0.252218	-0.145548	-0.0238406	0.0712559	-0.0387066
BTBD3	-0.145947	0.17657	0.0316366	-0.17626	-0.0830293	-0.0128899	0.233121	0.0742668	0.197301	0.109084	0.050609	0.0823254	0.0671512	-0.0181109	0.105124	0.101208	-0.155268	-0.017238	0.00794858	0.148827	-0.0205354	0.128714	-0.34543	0.0114003	0.10102	0.00509755	0.0405509	0.110985
BTBD6	0.128509	0.0495167	0.08437	0.132838	-0.108629	0.330934	-0.0584534	0.109053	0.0945753	0.113743	0.0843407	0.299566	0.191627	0.356099	0.202789	0.176362	0.215676	0.175744	0.0852371	0.223044	0.270484	0.123388	-0.0314852	-0.0137921	0.118487	0.192333	0.0208822	0.0883688
BTBD7	0.540082	0.489474	0.364348	0.0530326	0.378114	0.0561931	0.554671	0.213581	0.540614	0.596656	0.487082	0.464898	0.482144	0.536404	0.171802	0.357415	0.404766	0.534704	0.3419	0.399289	0.565643	0.559542	0.52376	0.44902	0.44832	0.668998	0.505587	0.46733
BTBD9	0.121819	0.167776	0.192228	0.150818	0.142335	0.139616	0.153482	0.178267	0.171014	0.190486	0.0898105	0.203782	0.118875	0.136242	0.267131	0.117114	0.12844	0.0929081	0.19576	0.148521	0.154621	0.16373	0.173478	0.326535	0.139976	0.0290604	0.0719346	0.0935741
BTC	-0.249524	-0.285224	-0.418376	-0.0376157	-0.411402	-0.512431	-0.415288	-0.430366	-0.582026	-0.480283	-0.300706	-0.242134	-0.332935	-0.367713	-0.287537	-0.484922	-0.248523	-0.295975	0.016706	0.0792582	-0.332383	-0.00424781	-0.427244	-0.450027	-0.257783	-0.31185	-0.256763	-0.351213
BTD	-0.612069	-0.159383	-0.132056	-0.379238	-0.248005	-0.716403	-0.358334	-0.338153	-0.751669	-0.491475	-0.196844	-0.602544	-0.527082	-0.545269	-0.115745	-0.352003	-0.119671	0.0261147	-0.0665622	-0.560255	-0.542346	-0.371292	-0.558876	-0.490749	-0.0363547	0.0844244	-0.153271	-0.233386
BTF3	-0.245157	-0.100187	-0.139571	-0.254581	-0.182539	-0.068086	-0.176393	-0.198006	-0.0737495	0.0588467	-0.0867926	0.131642	-0.109874	-0.182738	-0.267922	-0.0585544	-0.186561	0.113457	-0.0337877	-0.0462054	0.0771895	0.033073	-0.0958666	0.110188	-0.194254	0.340147	0.129964	0.128048
BTF3L4	-0.473705	-0.505048	-0.592952	-0.452122	-0.706064	-0.578335	-0.387095	-0.569084	-0.56725	-0.455202	-0.459391	-0.415928	-0.457546	-0.659363	-0.375874	-0.652134	-0.409034	-0.385235	-0.252946	-0.316802	-0.436421	-0.476928	-0.438464	-0.397702	-0.643399	-0.3107	-0.350801	-0.521607
BTG1	-0.570046	0.09641	-0.0534045	-0.309219	-0.350929	-0.504856	-0.149497	0.175392	-0.324412	0.188898	-0.225913	-0.15602	-0.102296	-0.251617	0.0839352	-0.15456	-0.0569228	-0.00142472	0.296525	-0.203377	0.134436	0.133655	0.109408	0.0254965	-0.0387849	-0.234563	-0.462781	0.232781
BTG2	1.00096	1.10098	0.621018	0.653071	1.27552	0.228245	3.53153	2.44839	1.29364	1.88313	-0.0158405	0.0694392	0.916041	0.874425	2.08352	0.0330167	0.978427	0.595058	1.12484	0.667689	0.648154	0.41022	0.557729	0.0465366	0.744989	0.646565	0.242321	0.924672
BTG3	-0.841149	-0.675674	-0.701292	-0.872009	-0.808164	-0.858405	-0.407732	-0.440574	-0.715999	-0.837299	-0.814029	-0.870068	-0.460231	-0.827163	-0.775341	-0.772947	-0.772614	-0.711861	-0.593216	-0.541183	-0.750448	-0.859038	-0.661505	-0.833336	-0.524387	-0.646084	-0.660028	-0.449904
BTG4	0.2879	0.117078	0.191632	0.185298	0.291958	0.124974	0.174934	0.286697	0.112805	0.24182	0.254409	0.224922	0.0747388	0.173624	0.221649	0.160697	0.091847	-0.11762	0.0996731	0.0522008	0.0887374	0.101453	0.0239046	0.0344696	0.0436653	0.00182319	0.118959	0.140138
BTK	0.177522	0.261405	0.265168	0.176308	0.167913	0.161695	0.0724893	0.0379507	0.308063	0.259023	0.0209064	0.400509	0.207108	0.062481	0.335684	-0.027446	-0.0832207	-0.150433	-0.319677	-0.157376	0.199686	0.428295	0.16509	0.0259796	0.15581	0.318647	0.159599	0.161329
BTLA	0.260125	0.164039	0.290823	0.113444	0.0875468	0.13151	0.0981526	0.231314	0.166764	-0.107745	0.227536	0.103632	0.12537	0.12771	0.023981	0.0102437	0.256942	0.15526	0.000689391	-0.0981796	-0.00734362	0.0117833	-0.0534747	-0.200238	0.186719	0.0963122	0.114375	0.141395
BTN1A1	0.598084	0.248235	0.532347	0.392665	0.418275	0.775642	0.497719	0.45913	0.436109	0.512678	0.407066	0.376128	0.24378	0.486159	0.364909	0.441416	0.26963	0.22256	0.398898	0.36911	0.476917	0.387271	0.470709	0.558081	0.585166	0.335797	0.473726	0.253447
BTN2A1	0.0285964	0.231439	0.120178	0.0941619	0.176858	0.0483643	0.0398097	0.146402	0.169239	0.201094	0.0714341	0.159343	0.131414	0.0551665	-0.00208091	0.0201663	0.00537998	-0.0813327	0.0395753	-0.0143101	0.123506	0.0209546	0.119915	0.096048	0.192484	0.0335645	0.0199349	-0.139608
BTN3A1	-0.069335	0.0302257	-0.0153284	-0.101688	0.182119	-0.112929	-0.262129	-0.0814421	-0.170336	-0.256173	-0.152474	-0.153472	-0.0864926	0.054024	-0.162179	-0.212128	-0.025271	-0.254261	-0.297758	-0.259164	-0.00287323	0.0262926	-0.263267	-0.127196	0.0987314	-0.242375	-0.0295122	0.00634052
BTNL8	-0.101396	0.249472	0.0269933	0.176653	0.0872818	0.126449	0.269744	0.111238	0.0272935	0.206709	0.324884	0.192886	0.122808	0.245381	0.0555984	0.178381	-0.073566	-0.115248	0.0907326	-0.281082	0.0885855	0.0145962	0.243976	-0.093191	-0.214429	0.199888	0.121531	0.300754
BTNL9	-0.0304934	-0.039521	-0.238775	-0.0531114	-0.24033	-0.224948	-0.390065	-0.235481	-0.0890306	0.0107607	-0.261492	-0.160998	-0.166262	-0.0844062	-0.228301	-0.0308298	-0.0291784	-0.0502421	-0.154325	-0.184286	-0.00341389	-0.00228581	0.0321104	0.0320556	-0.0255742	0.0493776	0.0913049	-0.0993038
BTRC	-0.00606872	-0.041771	0.0360723	0.102427	0.0111933	0.109098	0.0793775	-0.0375795	0.153429	0.00348607	0.1683	0.309966	0.0828436	0.147862	0.179067	0.289798	0.282641	0.138088	0.229449	0.416797	0.365462	0.337287	0.129539	0.395837	0.235597	0.340607	0.343048	0.152515
BUB1	-0.647968	-0.546552	-0.74097	-0.855997	-0.695557	-0.931681	-1.86503	-0.879503	-1.17827	-1.06114	-1.54042	-1.01758	-0.742531	-1.55352	-0.787115	-0.833669	-1.55571	-1.04598	-1.29458	-1.49719	-1.38988	-1.20608	-1.24328	-1.71411	-1.51416	-1.43266	-1.1804	-1.8429
BUB1B	-3.4544	-3.31321	-3.31424	-3.00483	-3.35618	-3.41956	-3.50456	-3.29483	-3.10227	-2.98527	-3.85952	-3.08744	-2.78953	-3.40894	-3.24961	-3.45235	-3.28504	-2.85731	-3.3721	-1.76857	-3.14076	-3.55467	-2.76216	-3.63546	-2.61429	-3.13678	-2.9898	-3.66514
BUB3	-0.973946	-1.08804	-1.39502	-0.375905	-0.314552	-0.680623	-0.620905	-0.937639	-0.889126	-0.857365	-0.879281	-0.737337	-0.646445	-0.485119	-0.875664	-0.936707	-0.968809	-0.795436	-0.753592	-0.947855	-1.34863	-0.535732	-0.982765	-0.534934	-0.554502	-0.708366	-0.68002	-1.02552
BUD13	-1.10866	-0.800704	-0.857816	-1.09376	-1.11122	-0.988661	-0.888668	-0.866826	-0.721597	-0.531594	-0.909303	-0.781357	-0.710997	-0.526855	-0.693525	-0.890514	-0.601518	-0.492692	-0.597283	-0.816412	-0.581296	-0.516812	-0.637509	-0.999368	-0.476563	-0.300948	-0.377631	-0.306207
BVES	-0.30818	-0.178039	-0.0692924	-0.187408	-0.247252	-0.118967	-0.232251	-0.307245	-0.258756	-0.13926	-0.201008	-0.365276	-0.130785	-0.15082	-0.515137	-0.288065	-0.33064	-0.273037	-0.307097	-0.309096	-0.0960656	-0.185554	-0.0233688	-0.448312	-0.198039	-0.36486	-0.446534	-0.245236
BVES-AS1	-0.0787616	0.199218	0.229441	0.237589	0.406433	0.0867619	-0.0623116	0.231816	0.291122	0.14304	0.0934481	0.0491848	0.201998	-0.0115503	0.1908	0.0365664	0.0892587	0.0164298	0.251764	0.0621007	0.0506152	-0.0807933	-0.045757	0.435076	0.137852	0.203198	0.0424484	0.00505759
BYSL	-1.10996	-0.899552	-1.18073	-0.974492	-0.870751	-1.07066	-0.994347	-0.688937	-1.01293	-0.680292	-0.748862	-0.771071	-0.731883	-0.569536	-0.451745	-0.534623	-0.625052	-0.311622	-0.436783	-0.520999	-0.52114	-0.396355	-0.450137	-0.499235	-0.212609	-0.640554	-0.393421	-0.344841
BZW1	-3.10035	-2.19321	-2.46236	-2.49605	-2.76487	-2.61973	-1.50474	-2.3951	-2.88768	-2.11073	-2.15108	-2.47557	-2.17865	-2.60626	-2.02199	-2.05956	-2.2631	-2.11789	-1.4294	-2.18963	-2.27004	-2.30682	-2.26156	-2.22411	-2.13413	-2.13071	-2.40964	-2.13183
BZW2	0.156868	0.0654004	-0.130321	-0.106335	0.066213	0.026106	0.248957	-0.163129	0.342112	0.0966109	0.314365	0.204229	0.0990772	0.422647	0.240601	0.336245	0.255416	0.215007	0.457682	0.253129	0.118129	0.129375	0.233078	0.504272	0.207513	0.385536	0.375474	0.189844
C10orf10	0.216968	0.271728	0.580001	0.324686	0.333545	0.34557	0.665008	0.781838	0.616981	0.358082	0.433547	0.501509	0.519367	0.612201	0.613136	0.374417	0.768763	0.341598	0.453317	0.49466	0.740367	0.494057	0.797933	0.498208	0.63128	0.318403	-0.02351	0.504609
C10orf107	-0.957082	-0.487852	-0.740232	-0.78276	-0.867574	-0.706569	-0.76757	-0.788796	-0.789279	-0.478508	-0.653242	-0.551408	-0.449227	-1.14172	-0.650171	-0.561989	-0.558286	-0.214572	-0.551623	-0.685608	-0.666435	-0.506673	-0.6606	-1.01167	-0.544038	-0.346403	-0.719525	-0.471519
C10orf11	0.117383	0.0841247	0.16575	0.184148	0.245632	0.187669	0.147917	0.394272	0.0970719	0.310875	0.129526	0.234544	0.110057	0.292262	0.0668766	0.0915165	0.120083	0.203134	0.16726	-0.00428216	0.198144	0.216441	0.239845	0.315517	0.13108	0.155001	0.255549	0.157847
C10orf113	-0.00428622	-0.0526777	-0.0943144	-0.071028	-0.065863	-0.081398	-0.149418	0.0241922	-0.178457	-0.16804	0.0871537	-0.0942513	-0.0297859	0.0658609	0.053332	-0.0977028	0.104571	-0.0886227	-0.0858706	0.0711014	0.215464	0.10843	0.144149	0.157704	-0.000792383	-0.0111791	0.0994066	0.121881
C10orf12	1.20101	1.03985	1.10159	0.97205	0.928453	1.25192	1.23742	0.789903	1.26841	1.35777	1.10686	1.08984	0.988405	1.28779	0.720712	0.937739	1.14028	0.924235	0.983034	0.997261	0.770342	0.781779	0.86224	1.02722	0.744778	0.907147	0.509841	0.775494
C10orf25	0.061752	-0.100119	-0.0942227	0.0333862	0.143484	0.0878773	0.0224697	0.280789	0.0813861	-0.0533354	-0.0655315	-0.162892	-0.0668184	-0.07839	-0.0448764	0.00647779	0.12589	-0.136249	0.0514913	-0.00334914	-0.0723449	-0.0703855	0.153671	-0.133438	-0.0799407	-0.0514411	0.222412	0.111214
C10orf35	-0.128012	0.0382229	0.0654695	-2.2e-05	2.35e-05	-0.136073	-0.453676	-0.0795473	-0.0837616	0.057105	0.265924	0.144925	0.0235847	-0.245795	0.0571942	-0.0837244	-0.110217	-0.0206814	-0.0870403	0.105812	-0.158252	-0.277734	0.10858	-0.0271669	-0.185514	-0.308895	-0.264002	-0.0917408
C10orf53	0.086454	0.160693	-0.0388467	-0.00817762	0.0937285	0.0676669	-0.167229	0.101606	-0.0532127	-0.0124337	-0.0299567	-0.0539148	0.00525969	0.013058	0.214793	0.172328	-0.0846563	0.0212831	-0.193295	0.0431947	-0.0199265	-0.0154926	0.0285327	0.196223	-0.0753542	-0.0392191	0.0310518	0.105539
C10orf54	0.704989	0.453226	0.404483	0.767419	0.78335	0.62581	0.728594	0.3368	0.556557	0.777834	0.709413	0.646846	0.78041	0.861597	0.854065	0.705085	0.826337	0.580488	0.541981	0.681995	0.765611	0.697546	1.01809	0.940493	0.673639	0.774878	0.657273	0.661987
C10orf55	0.298885	0.0791903	0.122073	0.17091	-0.0148524	0.427477	0.323016	0.107347	0.0719472	0.237285	0.107138	0.101639	0.018374	0.136521	0.16845	0.141735	0.0850857	0.0386909	0.103795	0.047353	0.0115935	-0.0125748	0.149059	0.0943132	0.138592	0.0457657	0.104797	0.0769756
C10orf62	-0.712276	-0.627624	-0.356893	-0.500671	-0.559933	-0.675665	-0.569809	-0.449573	-0.747723	-0.566385	-0.417145	-0.591633	-0.422147	-0.537288	-0.499814	-0.452631	-0.381726	-0.367565	-0.402414	-0.392141	-0.394364	-0.470007	-0.35176	-0.398739	-0.557622	-0.40555	-0.56461	-0.405488
C10orf76	0.0784989	-0.119472	-0.286407	-0.183652	-0.0737208	0.0912342	-0.264165	-0.265944	-0.0512035	-0.169102	-0.129652	-0.128465	0.000307504	0.0561193	-0.11672	-0.161888	-0.129629	0.12027	-0.0339622	-0.108797	0.0501231	0.232494	-0.00125728	-0.0654546	0.118984	0.0689163	-0.048299	0.0283949
C10orf82	0.382133	0.364818	0.221293	0.397302	0.302883	0.476528	0.318995	0.501835	-0.278412	0.409621	0.286792	0.304885	0.228441	0.398977	0.0535006	-0.136822	0.230194	0.0816992	-0.0758524	0.321797	0.161453	0.292987	0.243332	0.558429	0.219523	0.260998	0.327172	0.0149241
C10orf90	0.0728362	0.194513	0.16781	0.185824	0.164278	0.211295	0.122081	0.169753	0.299625	0.155536	0.122423	0.182752	0.12265	0.130412	-0.130749	0.0547806	-0.0209621	0.015995	0.0725107	-0.00690047	0.0756754	0.0167913	0.0752542	0.0574172	0.117571	0.0645465	-0.000421756	0.0754028
C10orf95	0.249928	0.354117	0.479619	0.145958	0.10457	0.179313	0.467359	0.164017	0.470238	0.220343	0.391846	0.023787	0.214454	0.345254	0.0444211	0.111774	0.215401	0.151455	0.305917	0.0876151	0.166516	0.0716528	0.148206	0.45466	0.149244	0.0591061	0.292727	0.23564
C10orf99	-0.0210543	-0.181013	-0.0946095	-0.124633	0.150847	0.101806	-0.110625	-0.0441976	-0.0613655	0.0950761	0.000351026	0.0107018	-0.0595021	-0.159217	-0.197854	0.0661064	-0.215587	-0.129366	-0.155243	-0.0767919	-0.128141	-0.0577605	-0.249335	-0.124046	-0.00186735	0.0312706	0.0292172	-0.108082
C11orf1	-0.834521	-0.816374	-0.874337	-0.751474	-0.680739	-0.666694	-0.872726	-0.513416	-0.654795	-0.440362	-0.785486	-0.525101	-0.677047	-0.526404	-0.432724	-0.695007	-0.41281	-0.311556	-0.60125	-0.669239	-1.00497	-0.499486	-0.694252	-0.640319	-0.641595	-0.481724	-0.517513	-0.533762
C11orf16	0.195612	0.174265	0.425932	0.249965	0.306783	0.375889	0.253025	0.274928	0.346308	0.0735857	0.381312	0.126634	0.0678349	0.21538	0.163364	0.214344	0.0288404	0.1185	0.102392	0.138522	-0.0349984	0.0674001	0.192753	0.132266	0.128895	0.188385	0.140538	0.0997998
C11orf21	0.550121	0.102619	0.279456	0.49304	0.558656	0.719201	0.000495589	0.334808	0.219052	-0.229319	0.42313	0.590782	0.0725039	0.538029	0.347953	0.289127	0.286407	0.318669	0.232649	0.909595	0.62444	0.757263	0.810645	0.422716	0.42532	0.69435	0.397593	0.677117
C11orf24	0.235491	0.311682	0.271292	0.169601	0.132968	0.411146	0.622315	0.308274	0.289995	0.28259	0.305895	0.298232	0.303099	0.384832	0.355392	0.404659	0.187879	0.219918	0.223347	0.304896	0.397473	0.427659	0.5433	0.326742	0.404606	0.403596	0.380074	0.319924
C11orf31	0.22776	-0.0402901	0.0735414	0.187394	0.328684	0.0942168	0.00455833	-0.142783	0.130171	0.137467	0.160028	0.00788397	0.216615	0.180512	0.0602274	-0.0331492	-0.0490884	0.0319974	0.121627	0.383376	0.241549	0.0212715	0.157583	-0.036413	-0.0413078	-0.187285	0.27687	0.251631
C11orf49	0.418071	0.328093	0.279267	0.361588	0.551572	0.318237	0.258825	0.162945	0.304101	0.235955	0.281219	0.288711	0.319266	0.221869	-0.00496774	0.0754611	-0.0109217	0.179253	0.0521094	0.103066	0.0528639	0.103547	0.20171	0.168799	0.0239497	0.0129513	0.174628	0.183144
C11orf53	0.328099	0.208956	0.271127	0.289795	0.24093	0.402423	0.195372	0.208608	0.222804	0.210109	0.429243	0.167998	0.16591	0.235169	0.237479	0.0459568	0.281188	0.24629	0.238032	0.139449	0.19124	0.20089	0.0577881	0.303232	0.235848	0.0905961	0.195756	0.200567
C11orf57	-0.422678	-0.235185	-0.125833	-0.189981	-0.384089	-0.27419	-0.124136	-0.292553	-0.259907	-0.192052	-0.220973	-0.121148	-0.0479009	-0.0210784	0.00402212	-0.024263	0.11119	0.012457	-0.121856	0.0200445	0.0162963	-0.130125	-0.178585	-0.0629035	-0.122944	-0.0606606	-0.124829	-0.123988
C11orf58	-1.09025	-0.616222	-0.654173	-1.02445	-1.12916	-1.02118	-0.440712	-0.607721	-0.809378	-0.473105	-0.64282	-0.44209	-0.370217	-0.569502	-0.133738	-0.311171	-0.174356	-0.250213	-0.136783	-0.275923	-0.575994	-0.744733	-0.14644	-0.151759	-0.373504	-0.29932	-0.279693	-0.198902
C11orf63	-0.199485	-0.0810556	0.369444	-0.18486	-0.219983	0.175959	0.185673	0.0115099	0.0378307	0.0876138	-0.0925261	0.0460743	0.125267	0.269415	-0.131569	0.206748	-0.0939186	-0.099076	-0.0348659	0.114394	0.0164644	0.209963	-0.129569	0.302756	0.00753995	0.148009	-0.116646	-0.0923686
C11orf65	0.300383	0.179969	0.277139	0.223151	0.144944	0.084543	-0.0836248	0.191296	0.0693046	0.0583374	-0.033296	0.109972	-0.092859	-0.109271	0.0415197	0.00144773	-0.0453251	-0.100759	0.0280791	0.0705208	0.00408649	0.0264047	0.183663	0.283668	0.0675094	0.053027	0.199851	-0.0330378
C11orf68	0.297181	0.242301	0.283543	0.229339	0.372423	0.392468	0.365194	0.526607	0.497088	0.457462	0.474447	0.577298	0.645466	0.849662	0.581883	0.657273	0.727356	0.546022	0.608677	0.638243	0.456292	0.571086	0.375508	0.403428	0.408097	0.369305	0.236907	0.462743
C11orf70	-0.00101517	-0.0272212	0.161824	-0.187333	0.168063	0.0586064	0.0460344	0.171054	-0.123046	-0.0344312	-0.0454778	-0.0288189	0.016149	-0.0892008	-0.154587	0.0156674	-0.236212	-0.21877	-0.140646	-0.103919	-0.0870398	-0.157153	-0.228816	-0.330254	-0.184807	-0.0630126	-0.352739	-0.175037
C11orf71	-0.288733	-0.450916	-0.242818	-0.33422	-0.113165	-0.27811	-0.0306353	-0.178389	-0.116885	-5.33e-05	-0.0383702	-0.0117995	0.0242938	-0.279044	0.0900425	-0.104895	0.303186	0.0505962	0.139423	0.013358	-0.35808	-0.166697	-0.0724459	0.197926	-0.0452357	-0.0690299	-0.00566721	-0.238375
C11orf80	-0.5957	-0.635185	-0.762822	-0.729335	-0.474157	-0.562614	-0.66057	-0.578957	-0.629001	-0.54271	-0.563915	-0.489567	-0.590334	-0.336817	-0.335362	-0.629771	-0.702933	-0.366819	-0.553775	-0.402573	-0.671944	-0.478505	-0.467177	-0.613238	-0.467663	-0.623351	-0.603546	-0.705948
C11orf88	0.167241	0.163415	0.202068	0.123258	-0.161615	0.221741	0.0133747	0.0397402	-0.0106726	-0.109805	0.0505745	0.123445	0.0754003	-0.00911377	-0.0103032	0.145593	0.140855	0.0313278	0.0674097	0.140154	0.175361	0.0635243	0.160756	-0.0465835	0.0104334	-0.018073	-0.0602918	0.169381
C11orf96	-0.181634	-0.164708	-0.424433	-0.204438	-0.250907	-0.273352	-0.202934	-0.233229	-0.185252	-0.210647	-0.183778	-0.190581	-0.212502	-0.129954	-0.0282231	-0.140872	-0.158043	-0.126826	-0.196229	-0.161183	-0.0481273	-0.0977607	-0.195647	-0.036347	-0.216713	-0.158008	-0.126113	-0.117779
C12orf29	0.0311524	-0.0254859	-0.184688	0.00548607	0.0279305	0.0922253	0.0455669	0.0199963	0.193783	0.165321	0.0450638	0.0396834	0.0834479	-0.0382946	0.240307	0.115051	0.0491934	0.220116	0.161618	-0.0805598	-0.0647726	0.19204	0.112776	0.133899	0.0829056	0.118322	0.177323	0.103499
C12orf4	-0.244489	0.0142968	-0.563063	-0.378693	-0.172291	-0.218317	-0.5828	-0.119548	-0.372976	-0.336491	-0.188925	-0.553715	-0.384464	-0.536813	-0.284699	-0.0256034	-0.384424	-0.160253	-0.18868	-0.224338	-0.425673	-0.233375	-0.122035	-0.463243	-0.299772	-0.451127	-0.0749581	-0.128221
C12orf43	-0.416375	-0.442608	-0.256288	-0.278842	-0.250186	-0.316994	-0.179844	-0.189844	-0.430985	-0.43209	-0.396009	-0.519029	-0.405284	-0.37239	-0.442028	-0.243323	-0.286729	-0.430853	-0.440485	-0.308795	-0.175535	-0.303846	-0.384776	-0.274996	-0.271786	-0.224024	-0.403653	-0.339248
C12orf49	-0.145784	-0.275081	-0.264339	-0.147832	-0.294339	-0.19683	-0.0962266	-0.190549	-0.180621	0.0460501	-0.118921	-0.31774	-0.0165281	-0.134363	-0.134996	-0.242934	-0.310667	-0.0368353	-0.229518	-0.174287	-0.183077	-0.164638	-0.0521607	0.0563597	-0.0943816	-0.195841	-0.109657	-0.257258
C12orf56	-0.501879	-0.291278	-0.418026	-0.333896	-0.368565	-0.582607	-0.391277	-0.384112	-0.566124	-0.366318	-0.239382	-0.386041	-0.354868	-0.394731	-0.282612	-0.331825	-0.242281	-0.620033	-0.595234	-0.321617	-0.465986	-0.450244	-0.35428	-0.430915	-0.500488	-0.391603	-0.44468	-0.383672
C12orf57	-0.124596	-0.104756	-0.0631656	-0.141759	-0.153443	-0.134872	0.0572733	-0.0407028	-0.00579372	-0.0590036	-0.143054	-0.0705289	0.0201625	-0.0188653	-0.0136022	0.000437157	0.119347	-0.0023228	0.0432109	0.0910117	-0.0126875	-0.129595	0.120544	0.285709	-0.119045	0.098606	0.039345	0.0541692
C12orf60	0.277987	0.228209	0.0573963	0.244377	0.294879	-0.0218925	0.271592	0.178491	0.398774	0.0907852	0.0234222	0.295305	0.161393	0.484365	0.305282	0.30572	0.151323	-0.0337403	0.450803	0.336705	0.0396623	0.251036	0.345071	0.0188379	0.0238823	0.155806	0.0628194	0.24697
C12orf65	0.482453	0.336984	0.0324187	0.372001	0.291042	0.148287	0.289896	0.0623817	0.608068	-0.0507356	0.243349	0.18825	0.242648	0.226545	0.200729	0.15839	0.226967	0.0352184	0.163292	0.389645	0.158831	-0.100077	0.195547	0.316455	0.121409	0.189007	0.156151	0.275916
C12orf66	-0.421486	-0.213243	-0.333723	-0.250956	-0.0314394	-0.265958	-0.311442	0.185267	0.146547	-0.285245	-0.297995	-0.106763	-0.102231	-0.366458	-0.173036	-0.256417	-0.402267	-0.346994	-0.28143	-0.141234	-0.496136	-0.0213775	-0.477341	-0.406804	-0.196201	-0.0932259	-0.0597228	-0.163464
C12orf76	0.129702	0.245835	0.374163	0.144684	0.379704	0.40411	0.0253462	0.285529	0.0822082	0.149604	0.209293	0.202012	0.124836	0.0685502	0.0765845	0.0837998	0.0490144	-0.048145	-0.0129865	0.227263	0.0555709	-0.00632805	0.0691407	-0.135624	0.0342089	0.116612	0.0102153	-0.0347511
C14orf105	0.280446	0.159099	0.413549	0.0179845	0.326463	0.193091	0.325398	0.160832	0.181938	0.118569	0.089279	0.0786944	0.462475	0.0113986	0.106298	0.316678	0.0244217	0.352358	-0.294122	0.147074	0.245165	0.142503	0.267276	0.0874307	-0.00879986	-0.0532209	0.246288	0.0420395
C14orf119	-1.3434	-1.08629	-1.03147	-1.0078	-1.27368	-1.2546	-0.97107	-1.02964	-1.27416	-0.925173	-1.1438	-0.856825	-0.857484	-0.983779	-0.926447	-1.25437	-0.980742	-0.943511	-1.05366	-1.03147	-1.15916	-1.05796	-1.13633	-1.02147	-1.01082	-1.01827	-1.16077	-1.00832
C14orf159	1.04236	1.05417	0.931834	1.04878	0.882276	1.22169	0.587515	0.74002	1.31064	0.795977	1.1265	1.30623	1.17362	0.967403	1.24635	1.40007	1.52972	0.932616	1.70054	1.11538	1.47851	1.3301	1.26996	1.68811	1.32004	1.53007	1.10828	1.78993
C14orf166	0.228994	0.129569	0.170912	0.0932172	-0.136317	0.254757	0.217873	0.101587	0.264706	0.169671	-0.00289422	0.232414	0.234766	0.263829	-0.0304859	0.286582	0.226607	0.0820419	0.0176564	0.23985	0.0945536	0.0623843	0.0552619	0.131856	0.268774	0.130074	-0.0051731	0.0591865
C14orf180	0.158379	0.319999	0.174035	0.400235	0.460251	0.573503	0.370351	0.676568	0.400915	0.122823	0.370281	0.411337	0.373098	0.518636	0.686622	0.292319	0.52762	0.210696	0.266863	0.582898	0.579687	0.621366	0.676143	0.693497	0.248824	0.457671	0.220448	0.515939
C14orf2	0.0345984	0.135569	0.395339	-0.0137259	0.243557	0.264696	0.217673	0.088107	0.391072	0.281029	0.330971	0.165888	0.262772	0.352424	-0.00916073	0.0787532	0.190452	0.0106061	-0.0804387	0.0389794	0.103402	-0.0579606	0.0492403	0.366645	-0.00803412	0.0905804	0.0928676	-0.0252424
C14orf28	0.139326	0.107474	0.496092	0.349578	0.112026	0.185908	0.202549	0.229249	0.364091	0.355879	0.315076	0.141256	0.204349	0.37649	0.155942	0.219658	0.313516	0.0129716	0.262273	-0.0335132	0.221134	0.26177	0.395205	0.107913	0.21479	0.129366	0.00426984	0.184564
C14orf37	0.275841	0.269592	0.168867	0.231527	0.203516	0.128384	0.249039	0.0541548	0.133131	0.0397696	0.213539	0.0386955	0.0959704	-0.0420089	0.116748	-0.00658463	0.00154339	0.0801076	0.17853	-0.034471	-0.00515455	0.154785	0.0673735	0.150528	0.118381	0.0875678	0.126775	0.129701
C14orf79	0.471871	0.178012	0.282622	0.155298	0.299075	0.352392	0.270566	0.36109	0.223857	0.291823	0.312727	0.312953	0.110684	0.180633	0.22847	0.254115	0.402551	0.168282	0.241454	0.157686	0.0483013	0.26513	-0.0167772	0.172473	0.320674	0.265371	0.296562	0.179155
C14orf93	0.0258805	-0.0367206	-0.132112	0.0111722	-0.0242387	0.000539799	-0.0818553	-0.102079	-0.117215	0.0245389	0.0126634	-0.0863384	-0.135208	0.0469942	-0.0239141	0.104041	0.0601695	-0.0178747	0.117393	0.0101117	0.131812	0.106859	0.134602	0.0321453	0.0468797	0.00248133	0.146685	0.084202
C14orf99	-0.459964	-0.45477	-0.517704	-0.537118	-0.488815	-0.483213	-0.312139	-0.463609	-0.761272	-0.423348	-0.846085	-0.226343	-0.62639	-0.32344	-0.365016	-0.184904	-0.691184	-0.496292	-0.429366	-0.528581	-0.272338	-0.235606	-0.490824	0.0971733	-0.273248	-0.222096	-0.206567	-0.120719
C15orf39	-0.109021	-0.0155902	-0.242233	-0.177243	-0.167187	-0.154064	0.192218	-0.250584	-0.269666	0.163614	0.0814545	-0.1189	-0.125719	-0.257046	0.0469514	0.063324	0.0968988	-0.00504912	-0.138385	-0.213427	-0.124637	-0.0783163	0.128204	0.0615405	0.15718	0.0852198	-0.00929147	-0.0536771
C15orf41	0.260894	0.707122	0.537332	0.415452	0.241469	0.634233	0.106724	-0.00838201	0.408263	0.229616	0.537404	0.55917	0.356276	0.681947	0.527236	0.536356	0.832407	0.637536	0.829966	0.851816	0.496613	0.515789	0.669596	0.686918	0.491946	0.502912	0.369461	0.611263
C15orf48	-0.0649757	0.0651635	0.0639772	0.0197816	0.288992	0.0834742	0.103924	0.128695	-0.296737	-0.331299	0.143587	0.0539627	-0.240878	0.160898	-0.166162	-0.209754	-0.00582475	-0.0417156	-0.0803796	-0.152095	0.0961179	-0.0833023	0.0240409	0.223924	0.102641	0.00242718	0.00102888	0.0873277
C15orf52	-0.510906	-0.487191	-0.395879	-0.014057	-0.376529	-0.292883	-0.183793	0.0120153	0.0782861	0.242733	-0.00436313	0.0410629	0.260929	0.203239	0.0475781	0.0704697	0.255531	0.142996	-0.00826765	0.313194	0.349793	0.24241	0.140084	0.3888	0.245601	0.169309	0.157377	-0.028599
C15orf57	-0.332554	-0.153606	-0.0947549	-0.0395054	-0.0182078	-0.164144	-0.127017	0.166307	-0.171372	-0.264663	-0.248859	-0.0688004	-0.109721	-0.200416	-0.181686	-0.0986989	-0.234578	-0.152653	-0.197223	-0.0837765	-0.15134	-0.220768	-0.320345	-0.310005	-0.17309	-0.321748	-0.264742	-0.321477
C15orf59	-1.93253	-1.99445	-1.81962	-1.64267	-1.64375	-1.46572	-1.84524	-1.11011	-1.68264	-1.05764	-1.75386	-1.34398	-1.32265	-1.20998	-1.19632	-2.03156	-1.32271	-1.56379	-1.54388	-1.89202	-1.48426	-1.42338	-1.48656	-1.42885	-1.49137	-1.46094	-1.52483	-1.43151
C15orf61	-0.431571	-0.394118	-0.371442	-0.337996	-0.145089	-0.272121	-0.244178	-0.348958	-0.258577	-0.294711	-0.18784	-0.0482224	-0.166146	-0.231979	-0.313353	-0.148543	-0.272346	-0.189336	-0.146956	-0.114024	-0.358204	-0.14919	-0.236375	-0.354386	-0.294395	-0.105833	-0.366445	-0.12156
C16orf45	0.177813	0.0919549	0.27449	0.236434	0.185943	0.41621	0.14388	0.269768	0.110371	0.213236	0.25915	0.254166	0.155257	0.382898	0.325951	0.403546	0.347869	0.246885	0.401271	0.478853	0.47564	0.319557	0.410808	0.553793	0.352029	0.426879	0.284606	0.353187
C16orf46	-0.659807	-0.150727	-0.492209	-0.654039	-0.486916	-1.09655	-0.577618	-0.374411	-0.571742	-0.689127	-0.739424	-0.705494	-0.411949	-0.704947	-0.714604	-0.736916	-0.456469	-0.36424	-0.442142	-0.551283	-0.515645	-0.40369	-0.71441	-0.186179	-0.386516	-0.240127	-0.235757	-0.242774
C16orf58	0.712811	0.628691	0.666332	0.610515	0.716891	0.799786	0.686357	0.551389	0.727446	0.595016	0.518583	0.655481	0.490517	0.481902	0.354548	0.481994	0.387696	0.341954	0.366163	0.342758	0.470192	0.490101	0.440467	0.320313	0.381744	0.278619	0.389931	0.268113
C16orf62	-0.276521	-0.330416	-0.206857	-0.281774	-0.176696	-0.208853	-0.348915	-0.188916	-0.364828	-0.263328	-0.320233	-0.278117	-0.248136	-0.29055	-0.191837	-0.147561	-0.219974	-0.165701	-0.152596	-0.236044	-0.236757	-0.222463	-0.294179	-0.153772	-0.211192	-0.240861	-0.267687	-0.242963
C16orf72	0.238554	0.335828	0.292612	0.12703	0.331492	0.151487	0.228893	0.252462	0.233595	0.0613135	0.225966	0.241979	0.143429	0.105423	0.205063	0.118848	0.142494	0.136059	0.115577	0.116813	0.269929	0.0802604	0.23662	0.181292	0.107798	0.15476	0.335509	0.0120502
C16orf74	-0.519544	-0.587313	-0.687746	-0.641657	-0.447627	-0.685196	-0.744016	-0.439672	-0.710088	-0.516414	-0.829561	-0.524153	-0.584634	-0.468759	-0.474011	-0.44502	-0.58679	-0.646889	-0.752363	-0.609216	-0.589261	-0.427858	-0.521243	-0.612499	-0.592616	-0.404637	-0.38793	-0.576436
C16orf86	-0.188724	-0.112808	-0.362739	0.0639237	-0.00949867	0.0899356	0.23327	-0.0271138	-0.14053	-0.236265	-0.0565747	-0.204	-0.117322	0.0468517	-0.00304995	0.150959	0.127402	0.0604186	0.195016	0.0364406	0.0890503	0.192678	0.214848	0.201819	0.0198897	0.0932171	-0.214915	0.165624
C16orf89	-0.799236	-0.445232	-0.727886	-0.543287	-0.757242	-0.768661	-0.732402	-0.5928	-0.463853	-0.591807	-0.427198	-0.498644	-0.7107	-0.168936	-0.625983	-0.563239	-0.423611	-0.333979	-0.390756	-0.369609	-0.424599	-0.259031	-0.428462	-0.647189	-0.440685	-0.505774	-0.543443	-0.525865
C16orf95	0.253198	-0.164584	-0.215921	0.139231	-0.250311	0.0271554	-0.00403153	-0.0877313	0.00453556	0.0241027	-0.134711	0.162087	0.0856246	0.185155	0.0221203	0.0944576	0.0264691	0.183001	0.115784	0.090535	0.370341	0.174805	0.210389	-0.0288221	0.274131	0.126596	0.0121979	-0.0956055
C17orf105	0.059559	0.226961	0.146537	0.0136649	0.449664	0.442921	-0.0100097	-0.157849	0.272779	0.171092	0.321452	0.0360401	0.109013	0.265358	-0.104839	-0.0122789	0.409086	-0.0480715	0.332146	-0.180518	0.194173	0.348419	0.354651	0.147111	0.214902	0.44767	0.276353	0.291657
C17orf49	-0.395777	-0.449151	-0.104693	-0.327622	-0.164727	-0.450522	-0.0645627	-0.233626	-0.2089	-0.0195012	0.0263766	-0.233931	-0.00832873	-0.201969	-0.00393815	-0.189283	-0.13487	-0.307231	-0.175453	-0.234044	-0.397586	-0.299971	-0.274108	-0.443361	-0.348106	-0.190612	-0.294472	-0.0471053
C17orf50	0.414659	0.277777	0.3008	0.433818	0.320701	0.562367	0.518922	0.426518	0.34724	0.405852	0.371993	0.367277	0.269028	0.442741	0.220418	0.244898	0.304229	0.206963	0.212746	0.128081	0.270953	0.280638	0.226847	0.333594	0.148946	0.124489	0.0245711	-0.000658017
C17orf51	0.159293	0.319058	-0.0763508	-0.0967878	0.0179831	0.0694707	0.0316584	0.173847	0.121116	0.173946	0.068977	0.339061	0.223888	0.276979	0.402486	0.30675	0.179599	0.334207	0.246674	0.281801	0.207781	0.0253648	0.3092	0.372201	0.334656	0.218421	0.335847	-0.0145317
C17orf53	-0.232429	-0.111596	-0.146799	-0.138516	-0.304586	-0.060707	-0.332293	-0.2951	-0.0482886	-0.230723	-0.0695174	-0.246597	-0.151328	-0.192574	-0.303266	-0.312098	-0.281853	-0.225972	-0.387436	-0.362641	-0.0893162	-0.0449257	-0.130962	-0.241414	-0.119826	-0.00361511	-0.0427767	-0.0250352
C17orf58	-1.60805	-1.53383	-1.13931	-2.30095	-1.8452	-2.43072	-1.84348	-1.62229	-2.32822	-1.06618	-2.03808	-1.88588	-1.76411	-1.62709	-1.86767	-1.83028	-1.50612	-2.10579	-1.75838	-1.90199	-1.47775	-1.49906	-2.17902	-2.16226	-1.31029	-2.12744	-1.48494	-1.79843
C17orf67	-0.0998382	-0.0909939	-0.0255253	-0.0307163	-0.0248153	-0.0842752	-0.109584	0.0728889	-0.251526	-0.185366	-0.148492	-0.185181	-0.153148	-0.0306736	-0.0124497	-0.109773	-0.0597531	-0.0729728	-0.11272	-0.0865551	-0.0717059	-0.139852	-0.00875658	-0.0681528	-0.0636284	-0.110343	-0.188694	-0.170762
C17orf74	0.177055	0.104138	-0.135845	-0.0672604	-0.192431	0.213522	0.321683	0.26664	-0.00624845	0.0217398	0.0379899	0.253249	0.0799544	-0.0867263	0.00226854	0.277574	0.315493	0.0702906	0.0123919	-0.00705778	0.136146	0.0870075	0.177036	0.390712	-0.0137965	0.288161	0.0842571	-0.13383
C17orf75	-0.500995	-0.296711	-0.290138	-0.515081	-0.43041	-0.470596	-0.68425	-0.311144	-0.692923	-0.499718	-0.338783	-0.302055	-0.378601	-0.414732	-0.186899	-0.221147	-0.34582	-0.185426	-0.339358	-0.317707	-0.32544	-0.320789	-0.310437	-0.217193	-0.156778	-0.411566	-0.327467	-0.496974
C17orf80	0.0680697	0.0803783	0.328363	0.161546	-0.0667465	0.316441	-0.0340273	0.104705	0.339381	0.258517	0.286281	0.198232	0.124906	0.195716	0.262094	0.182497	0.0698401	-0.0435967	-0.0231836	0.147638	-0.0950427	0.0823502	0.0247996	0.422722	0.00198597	-0.029929	0.185678	0.114635
C17orf96	-0.0686037	-0.0224456	-0.36631	-0.274693	0.138572	-0.173047	-0.352045	-0.169597	-0.18595	-0.319578	-0.488365	-0.244758	-0.36411	-0.366757	-0.194141	-0.222828	-0.285946	-0.157984	-0.355995	-0.162995	-0.342072	-0.29	-0.196192	-0.285694	-0.413097	-0.346933	-0.362671	-0.441604
C17orf97	0.730792	0.154529	0.154615	0.119785	0.32755	-0.00411674	0.126548	0.234185	0.276692	0.135377	0.367151	0.397875	0.227374	0.367432	0.0134492	0.365095	0.108823	0.247898	0.209346	0.305661	0.396451	0.168785	0.49534	0.573083	0.394144	0.0631893	0.120539	0.249812
C17orf99	0.423775	0.395908	0.378026	0.492434	0.449728	0.489137	0.403072	0.231514	0.436507	0.552076	0.45669	0.240437	0.295524	0.45737	0.362486	0.250454	0.281714	0.21166	0.363388	0.21177	0.17241	0.287461	0.427394	0.469825	0.207351	0.326791	0.400703	0.301018
C18orf21	-0.978339	-0.839954	-1.05265	-0.942414	-1.02697	-1.07692	-0.99867	-0.896095	-0.958847	-0.782777	-1.08576	-0.956353	-0.696405	-0.808293	-0.76487	-1.065	-0.922721	-0.878328	-1.06992	-1.25646	-1.06847	-0.729228	-0.753184	-0.635435	-0.837428	-0.770931	-0.818873	-0.796733
C18orf25	-0.482536	-0.456473	-0.522839	-0.520198	-0.474901	-0.497831	-0.5912	-0.225763	-0.533368	-0.326152	-0.499493	-0.490925	-0.408933	-0.200528	-0.270266	-0.386036	-0.453179	-0.254764	-0.422971	-0.48423	-0.361223	-0.374296	-0.317587	-0.368828	-0.495928	-0.280856	-0.296245	-0.57477
C18orf54	0.0868155	0.0385392	0.0187518	0.122591	0.055666	0.0611822	0.205949	0.156351	-0.084855	0.0983154	-0.05405	0.188126	0.0113117	-0.0510295	0.0841555	-0.0103793	0.0548059	0.087231	-0.0149735	0.041252	0.0394216	-0.0488353	-0.0783366	-0.0481553	-0.0254318	-0.0608551	0.10989	-0.0541549
C18orf61	0.0961303	0.294459	-0.0541248	0.239406	0.0898172	0.151379	-0.152037	0.0788719	-0.0707488	0.0400928	-0.11413	-0.110997	-0.250739	-0.0626483	-0.152583	0.0855083	-0.0182644	-0.0969456	-0.0379378	0.010144	0.0287109	-0.140076	-0.113827	0.0964243	-0.122437	0.00248184	-0.179416	-0.0666604
C18orf63	-0.0140925	0.175777	-0.0902476	-0.107436	-0.18554	0.103501	0.230709	0.22344	0.11209	0.0643853	-0.0439567	-0.0282216	0.0865761	0.115538	-0.195615	-0.0520042	0.0774384	0.26671	-0.127305	0.117151	-0.0756474	0.0811723	0.0788808	0.173012	-0.156917	0.209989	0.0921434	-0.0705613
C18orf8	-0.150309	-0.34055	-0.390306	-0.399306	-0.172008	-0.213386	-0.285656	-0.241909	-0.373729	-0.240712	-0.463119	-0.247679	-0.424499	-0.193395	-0.344974	-0.368484	-0.311364	-0.336502	-0.408206	-0.364956	-0.329731	-0.34247	-0.369995	-0.389583	-0.389653	-0.620681	-0.583192	-0.237513
C19orf12	0.408377	0.367016	0.337831	0.399607	0.276231	0.367478	0.620125	0.302846	0.344572	0.508563	0.608307	0.186717	0.239948	0.425652	0.447808	0.16503	0.40519	0.316777	0.518407	0.45023	0.326784	0.262894	0.238539	0.603236	0.214542	0.256179	0.236913	0.382696
C19orf18	0.0928779	-0.193342	-0.192572	-0.04523	-0.144996	0.203605	0.0476446	-0.411096	-0.348246	0.069899	-0.25832	0.126012	0.11458	0.274419	-0.156671	-0.0800699	0.232482	0.185734	-0.0345178	-0.065619	-0.156918	-0.146462	0.13324	0.0670956	0.199804	-0.138224	0.448514	-0.180542
C19orf24	0.253092	0.215235	0.388281	0.31363	0.102945	0.283526	0.404694	0.229953	0.224735	0.132485	0.371936	0.20382	0.124533	0.266273	0.0996498	0.262204	0.0960729	-0.00823153	0.189809	0.243871	0.316762	0.0304863	0.216177	0.349802	0.114093	0.0889964	0.107817	0.22594
C19orf25	0.211948	0.0800977	0.117597	0.213446	-0.210684	0.0151612	0.261668	0.134794	0.180229	0.294104	0.341988	0.161337	0.209931	0.276439	0.189105	0.160428	0.278252	0.152255	0.223569	0.106523	0.233545	0.221788	0.265703	0.305892	0.244931	0.250879	0.236193	0.184205
C19orf43	-0.104065	-0.171012	-0.378785	-0.251176	-0.289275	-0.184504	-0.283541	-0.327987	-0.410551	-0.0500473	-0.263365	-0.106736	-0.0976291	-0.255884	-0.145653	-0.166192	-0.180677	-0.385785	-0.408961	-0.198051	-0.0868686	-0.217379	-0.268421	-0.200991	-0.316807	-0.203361	-0.114196	-0.288802
C19orf48	-0.884558	-0.563596	-0.703419	-0.614388	-0.688174	-1.03749	-0.638172	-1.01525	-0.631367	-0.840006	-0.783462	-0.97205	-0.687173	-0.777895	-0.920603	-0.648148	-0.656815	-0.733703	-0.75007	-0.888558	-0.719931	-0.814191	-0.587749	-0.668325	-0.471214	-0.879991	-0.522111	-0.669297
C19orf52	-0.251449	0.0095584	-0.243174	-0.0930075	-0.0785165	-0.233657	-0.178538	-0.379826	-0.275916	-0.268315	-0.217268	-0.162485	-0.26495	-0.196682	-0.164306	-0.0998389	-0.350892	-0.223335	-0.345717	-0.209047	-0.259089	-0.245087	-0.0706296	-0.138988	-0.391113	-0.195248	0.00967596	-0.238919
C19orf53	-0.604642	-0.74158	-0.635211	-0.344283	-0.805922	-0.606949	-0.560186	-0.595256	-0.435991	-0.383878	-0.216946	-0.45131	-0.286863	-0.519161	-0.330573	-0.199798	-0.223489	-0.513826	-0.230507	-0.222509	-0.40126	-0.383225	-0.309725	-0.109722	-0.37964	-0.238737	-0.447189	-0.339518
C19orf54	0.134141	-0.133337	0.0983235	-0.00501805	0.0079455	0.139657	0.00307926	0.0626308	-0.0985003	-0.0671991	-0.0391918	-0.136121	-0.0851562	-0.000212878	-0.13191	-0.0494788	0.00824209	-0.0978366	-0.0592834	-0.14419	-0.197197	-0.110105	-0.079115	0.083887	-0.142963	-0.25179	-0.406053	-0.127805
C19orf57	0.0898581	0.144934	0.0985022	0.0924934	-0.0430806	-0.0242047	-0.136788	-0.116233	0.0521413	0.0722273	0.0781801	0.226911	0.255196	0.261888	-0.0765251	0.159009	0.299928	0.108105	0.107656	0.138584	0.262271	0.322188	0.167937	0.542811	0.206678	0.136091	0.141892	-0.0090348
C19orf68	-0.947205	-0.489736	-0.721972	-0.517842	-0.704183	-0.777053	-0.479866	-0.596512	-0.442667	-0.485357	-0.315899	-0.606058	-0.434707	-0.619343	-0.524913	-0.722347	-0.485993	-0.565009	-0.511219	-0.527207	-0.434044	-0.625978	-0.590236	-0.672239	-0.726999	-0.378263	-0.490679	-0.381896
C19orf70	0.353112	0.234707	0.256597	0.41073	0.324044	0.22044	0.668434	0.387236	0.275384	0.158466	0.571551	0.302415	0.135915	0.311846	0.389678	0.50021	0.438768	0.229361	0.457502	0.439379	0.362875	0.197883	0.424487	0.618713	0.158443	0.383996	0.249231	0.439755
C19orf73	0.42411	0.541583	0.414119	0.350167	0.349959	0.417587	0.31315	0.182492	0.431576	0.311365	0.129728	0.469606	0.455388	0.347495	0.111411	0.35565	0.257083	0.277139	0.183372	0.183124	0.26786	0.240499	0.250172	0.417329	-0.166029	0.205612	0.660393	0.299943
C19orf81	-0.175227	0.22646	-0.0252509	-0.0521967	-0.0991556	-0.130841	-0.0445188	0.0292989	-0.279316	0.0145154	0.0259323	-0.124981	0.0291874	-0.111895	0.0289405	-0.180567	-0.173622	-0.0503838	-0.0197376	0.0600284	-0.0577502	0.0182449	0.0803895	-0.0858945	-0.150142	-0.063264	-0.241817	-0.0718665
C1D	-0.173986	-0.186196	-0.0568028	0.204017	-0.278184	-0.271018	-0.274197	-0.0713956	-0.276451	-0.333399	-0.407933	-0.209176	-0.160732	-0.249555	-0.319143	-0.115448	-0.148844	-0.0182048	-0.346078	-0.117252	-0.162349	-0.375868	0.0859429	0.692696	-0.025113	-0.194328	-0.138999	-0.0826551
C1GALT1	-0.200745	-0.1232	-0.435781	-0.328222	-0.367817	-0.0355038	-0.0542454	-0.216292	0.0901945	0.145343	0.0985678	0.0595128	0.189785	0.233339	0.123609	0.0910953	0.00508709	0.18519	0.397602	0.268745	0.076696	0.338839	0.198303	0.0653782	0.252191	0.235157	0.39464	0.237931
C1QB	0.96053	0.959227	1.01217	2.16657	1.77788	1.214	1.12124	1.50451	1.69114	1.53596	1.06078	1.44872	1.15293	0.88725	0.868765	0.686726	1.59404	0.751316	0.95173	0.722475	1.28722	0.744676	0.998318	1.44804	0.881707	0.814357	0.597812	1.69892
C1QC	0.741977	0.720297	0.547512	0.908506	0.469368	0.714766	0.346273	0.601895	0.893606	0.869694	0.518925	0.921974	0.77573	0.947425	0.523078	0.460214	0.766817	0.418562	0.200655	0.405495	0.693234	0.400406	0.581644	0.704446	0.457767	0.486763	0.295992	0.871524
C1QL2	0.192511	-0.0355549	-0.179408	-0.236627	0.156967	0.0700138	-0.292011	-0.0756061	-0.161607	-0.194816	-0.243204	-0.202605	-0.212996	-0.177266	-0.120583	0.171512	-0.213302	-0.316532	-0.102864	0.066884	-0.0135292	0.0187333	-0.0478275	-0.254508	-0.141581	-0.21461	-0.0379211	-0.107483
C1QTNF1	0.307233	0.326766	0.291397	0.389734	0.154135	0.229931	0.2375	-0.0152836	0.259053	0.21858	0.249416	0.389767	0.318384	0.262182	0.161985	0.355568	0.337125	0.202615	0.118892	0.279475	0.264308	0.264323	0.278377	0.354003	0.169761	0.307806	0.217542	0.492437
C1QTNF1-AS1	-0.161987	-0.436617	0.0443604	0.139718	0.214831	0.440702	-0.0693501	0.460218	-0.0315768	0.0767951	-0.359811	0.0363729	-0.094765	-0.133719	-0.0557866	0.159779	-0.141252	-0.0419157	-0.196943	-0.165318	-0.0407168	-0.0700734	0.103285	0.101212	-0.0560935	-0.237214	-0.0414755	0.159803
C1QTNF3	0.0254626	-0.142596	-0.0593025	-0.235017	-0.218566	-0.227121	-0.11218	-0.0750626	-0.0841369	-0.179569	-0.200588	-0.142992	-0.152527	0.166135	-0.265677	-0.195538	0.00471669	-0.0594808	-0.206903	-0.219775	0.0829249	0.0693957	-0.24754	-0.445742	0.0342998	-0.229311	0.0121503	0.0562824
C1QTNF5	-0.187262	-0.290458	-0.285439	-0.322563	-0.447244	-0.521782	-0.310738	-0.443688	-0.413338	-0.215996	-0.204731	-0.365174	-0.367438	-0.498379	-0.237219	-0.335283	-0.418669	-0.237422	-0.322296	-0.326563	-0.1203	-0.135851	-0.179949	-0.26394	-0.251741	-0.173943	-0.144001	-0.211258
C1QTNF7	-0.784994	-0.837739	-0.800927	-0.506808	-0.903623	-0.907673	-0.882994	-0.60138	-0.768714	-0.924424	-0.944012	-0.703964	-0.67986	-0.651324	-0.640993	-0.712558	-0.459597	-0.406577	-0.821295	-0.690089	-0.550887	-0.646348	-0.497324	-0.919391	-0.573805	-0.546523	-0.657381	-0.402967
C1QTNF9B	0.477856	0.509689	0.520358	0.430338	0.317829	0.387657	0.2159	0.40395	0.632231	0.291828	0.344386	0.383347	0.437431	0.316288	0.215372	0.28193	0.268398	0.255624	0.562895	0.455656	0.237283	0.340555	-0.0010774	0.224459	0.213413	0.443029	0.181336	0.217172
C1R	0.0576367	0.173047	0.680356	0.558418	0.514324	0.48689	0.629476	1.4476	1.03635	1.24434	0.436157	0.721114	0.984676	0.799162	1.0054	0.0252394	0.938447	0.179406	0.229654	0.277313	0.681974	0.085787	0.664297	0.484368	0.166662	0.0826854	-0.0683049	0.739265
C1S	-0.280221	-0.214629	0.0755235	0.13936	-0.00457589	-0.0128756	-0.0298871	0.0181209	-0.175434	0.0380733	-0.0628832	0.112816	-0.107872	0.0214566	0.0902591	-0.032278	-0.023005	0.146604	0.0451429	0.0960337	-0.141566	-0.015503	-0.169549	-0.00307887	-0.0261136	-0.0702324	0.0819192	0.0451574
C1orf100	0.133197	0.285615	0.242535	0.0582731	0.18505	0.0698488	0.286244	0.0783848	0.259969	0.115432	0.136746	0.222108	0.131381	-0.0440106	0.104407	0.0148557	0.0645379	-0.0137765	0.00488293	-0.104183	-0.182471	-0.0547225	0.0449809	0.0923647	-0.0387563	0.419752	0.0778057	0.0392869
C1orf105	0.0982955	0.0502851	0.240135	0.0659204	0.0847435	0.048173	0.278808	0.204567	0.0833298	0.0116115	0.1455	-0.00364797	-0.0101347	0.0655324	0.146414	0.0319309	0.0263895	-0.000241722	0.101017	0.0094815	0.0102939	-0.0360396	-0.00321527	-0.00398485	-0.00966716	-0.0334445	0.137027	0.0418225
C1orf111	0.431558	0.19408	0.576146	0.48563	0.376052	0.482219	0.292355	0.309917	0.264944	0.00442086	0.291824	0.0831073	0.206861	0.182238	0.241114	0.122757	0.190724	0.230453	0.153115	0.187376	0.236529	0.121006	0.193347	0.309225	0.21457	0.0313381	0.270717	0.200962
C1orf115	0.591521	0.699198	0.583189	0.726407	0.596648	0.884168	0.799053	0.412922	0.954064	0.773912	0.931321	0.349108	0.618765	0.877154	0.747024	0.51261	0.643455	0.438668	0.748116	0.708437	0.550581	0.433552	0.842969	0.976329	0.57181	0.477338	0.628793	0.677149
C1orf116	-0.182664	-0.171413	-0.109958	-0.136687	-0.12904	-0.0741785	-0.228286	0.188501	-0.12193	0.00252297	-0.105717	-0.0415483	-0.141714	0.146858	-0.023527	-0.121998	-0.144973	-0.0709725	-0.135852	-0.387065	-0.145123	0.0283877	-0.130034	-0.0682308	-0.0769274	-0.0278805	-0.0539006	-0.190915
C1orf123	-1.25266	-1.15098	-1.09184	-0.953863	-0.908162	-0.861534	-0.990229	-0.59208	-1.00609	-0.952996	-1.12882	-1.00508	-1.06254	-0.802026	-1.00197	-1.12579	-1.06482	-1.03398	-1.24648	-1.14123	-1.13424	-1.02166	-1.12637	-1.26162	-0.964242	-1.24513	-1.23788	-1.04873
C1orf131	0.445973	0.554959	0.546424	0.455274	0.452553	0.540556	0.343363	0.551086	0.663024	0.497267	0.363383	0.509478	0.250226	0.448485	0.225662	0.189069	0.200218	0.328658	0.245711	0.395525	0.342076	0.322531	0.232785	0.267187	0.257817	0.15429	0.259737	0.338445
C1orf132	0.472929	0.449831	0.265648	0.243174	0.373503	0.245579	0.327751	0.284208	0.231531	0.539977	0.403521	0.545476	0.490929	0.461006	0.229406	0.253986	0.227251	0.45059	0.239984	0.186554	0.361163	0.393655	0.546272	0.150333	0.327737	0.369295	0.279003	0.270525
C1orf146	0.0336909	-0.178474	-0.107617	-0.1725	-0.0586714	-0.147683	-0.274032	-0.220873	-0.133657	-0.18716	-0.192698	-0.11534	-0.164424	-0.0552829	-0.0317307	-0.142594	-0.0119277	-0.0304594	0.0743512	0.0474957	-0.11429	0.0636093	-0.227648	-0.147712	-0.116352	-0.078624	-0.126798	-0.323702
C1orf158	0.692934	0.46302	0.806215	0.574729	0.768052	0.735466	0.498302	0.573237	0.715768	0.472517	0.288519	0.667053	0.482769	0.486455	0.33366	0.41412	0.628586	0.416655	0.345355	0.521203	0.477143	0.399482	0.2958	0.267109	0.424086	0.309568	0.117234	0.289948
C1orf159	-0.131949	0.211985	0.310279	-0.139139	0.0810162	0.256953	0.0965532	-0.253677	0.106807	0.25485	0.454297	-0.03428	-0.093576	0.306246	-0.0106801	0.386218	-0.331741	0.0583006	-0.0410769	0.0539897	-0.00631049	-0.250408	0.214206	-0.077409	-0.244908	0.0614791	-0.000755476	0.291518
C1orf168	-0.231097	-0.00499176	0.0434476	-0.171206	-0.0558818	-0.0506549	-0.134344	-0.00935039	0.00621067	-0.16523	-0.29449	-0.103001	-0.024078	0.106384	0.0895838	-0.0978807	-0.253945	-0.227452	-0.0848122	-0.0789616	0.0277243	-0.158743	-0.197407	-0.101058	8.62485e-05	-0.115058	-0.247833	-0.0654172
C1orf186	-1.34163	-1.15085	-1.19212	-0.715098	-0.918589	-0.585801	-0.62947	-0.866836	-0.832243	-0.688434	-0.604337	-0.56932	-0.803721	-0.479424	-0.622963	-0.860154	-0.782492	-1.00105	-0.926145	-0.894924	-0.916403	-0.824651	-0.657575	-0.628726	-0.802136	-0.889807	-0.562948	-0.979242
C1orf189	0.501778	0.458054	0.359393	0.398128	0.447253	0.507876	0.425857	0.466864	0.459669	0.435353	0.441768	0.419105	0.468014	0.532764	0.173212	0.305411	0.224184	0.133591	0.258418	0.235815	0.312204	0.366981	0.29824	0.223386	0.243535	0.239415	0.150808	0.227065
C1orf198	0.537076	0.389929	0.520213	0.463088	0.150526	0.50898	1.15472	0.637528	0.577756	0.752343	0.68826	0.752213	0.73947	0.770848	1.01744	0.934606	0.66544	0.841909	0.692271	0.795362	1.02902	0.63066	0.762072	1.19752	1.02335	1.04462	1.34198	1.05734
C1orf21	0.287726	0.57881	0.542058	0.335294	0.279528	0.490691	0.679087	0.272202	0.677518	1.23134	0.612242	0.385375	0.43974	0.592475	0.361585	0.368859	0.400095	0.312769	0.412895	0.291308	0.516351	0.502944	0.295229	0.482964	0.255109	0.422049	0.400149	0.515319
C1orf210	0.285787	0.251386	0.18538	0.17418	0.178879	0.397687	0.437843	0.340528	0.625501	0.615974	0.591879	0.360931	0.489985	0.377832	0.347675	0.393218	0.534686	0.508551	0.402509	0.169474	0.397876	0.422749	0.513328	0.487261	0.373231	0.364865	0.272655	0.338364
C1orf27	0.43208	0.0994994	0.204775	0.274358	-0.0600193	0.42907	0.124233	0.0681814	0.309918	0.252915	0.400211	0.399854	-0.0241787	0.1722	0.170283	0.0653665	0.0407702	0.0610366	0.0687024	-0.0876861	0.247532	0.321439	-0.26151	-0.0403419	0.00428075	-0.129815	0.31164	0.358961
C1orf35	0.616571	0.624052	0.253359	0.420027	0.481231	0.764491	0.220594	0.325811	0.461395	0.456929	0.351084	0.524004	0.484022	0.685097	0.40365	0.460386	0.640611	0.30974	0.417349	0.242957	0.465851	0.48045	0.384395	0.460842	0.423942	0.384182	0.349605	0.127406
C1orf43	-1.13243	-1.13006	-1.0105	-0.826085	-1.19369	-1.03039	-0.790225	-1.01255	-0.917557	-0.865836	-0.686691	-0.629745	-0.495737	-0.66243	-0.461571	-0.480833	-0.361476	-0.60432	-0.710497	-0.403071	-0.650328	-0.799974	-0.638666	-0.277728	-0.600511	-0.3418	-0.481841	-0.309469
C1orf50	-0.0803556	-0.12059	-0.256356	-0.103279	-0.142322	-0.16495	-0.314219	-0.168038	-0.323459	-0.0729892	-0.372911	-0.185902	-0.0376395	-0.315686	-0.202081	-0.455698	-0.358473	-0.107072	-0.400897	-0.458911	-0.212161	-0.0107806	-0.285301	-0.369909	-0.306271	-0.0591208	0.0289541	-0.063168
C1orf52	-0.404654	-0.315446	-0.435528	-0.661743	-0.337804	-0.29452	-0.544415	-0.394162	-0.585087	-0.431383	-0.445663	-0.319383	-0.250044	-0.757187	-0.48796	-0.380505	-0.702662	-0.414936	-0.164703	-0.353258	-0.392094	-0.584392	-0.626173	-0.418763	-0.249744	-0.380594	-0.470445	-0.423191
C1orf53	-0.284444	-0.18008	-0.191645	-0.301671	-0.0982561	-0.169809	-0.184875	-0.0972637	-0.302644	-0.0967134	-0.128593	-0.125643	-0.190423	-0.0615555	-0.115051	-0.058259	0.0287958	-0.0609769	-0.220104	-0.12143	-0.188632	-0.0351097	0.0159093	-0.0998186	-0.0306884	-0.0565368	-0.266946	-0.00712419
C1orf54	-0.115299	0.229843	0.215579	0.347986	0.3199	0.352467	0.611802	0.378674	0.335284	0.354669	0.576509	0.324406	0.415147	0.333765	0.356948	0.0858916	0.486835	0.163721	0.38002	0.421176	0.369773	0.37976	0.498031	0.578073	0.264651	0.177933	0.027792	0.311585
C1orf56	-0.0851915	0.20974	0.289522	0.274706	0.246665	0.106082	0.116427	0.319268	0.161693	0.0140016	0.370505	0.15896	0.277215	0.176734	0.00842577	0.188379	0.186172	0.0883546	0.0692126	0.0443398	0.173304	0.229567	0.186219	-0.0204969	0.27687	0.179752	0.0819616	0.186036
C1orf61	0.760638	0.572478	0.600339	0.0515438	0.292179	0.589269	0.432567	0.284425	0.312773	0.0231729	0.493016	0.328956	0.11733	0.0737369	0.266863	0.318862	0.111018	0.0479774	0.133048	0.557527	0.385799	0.177571	0.30322	0.533068	0.310965	0.375456	0.0486097	0.3214
C1orf64	0.495963	0.404391	0.0433305	0.273718	0.341132	0.453957	0.462549	0.395157	0.226005	0.385803	0.331932	0.241197	0.291767	0.557897	0.545018	0.315462	0.361685	0.432734	0.297157	0.259411	0.44045	0.363283	0.187323	0.304111	0.257678	0.183845	0.425058	0.0252317
C1orf74	-0.0467396	-0.105388	-0.0820084	0.147721	0.126902	-0.0418414	-0.175998	-0.0866922	-0.100534	-0.234746	0.11347	-0.139395	-0.107089	-0.141663	-0.0204441	0.00623931	-0.0298477	-0.195593	-0.160483	-0.42864	0.0120006	-0.0252713	-0.0607174	0.0825119	-0.123754	-0.0719924	0.0268248	-0.0762748
C1orf94	0.444099	0.412887	0.30656	0.212347	0.459338	0.693029	0.550708	0.252416	0.416454	0.0899393	0.253008	0.573847	0.30203	0.174034	0.401363	0.335257	0.328371	0.202002	0.482521	0.24025	0.323621	0.284062	0.427774	0.445648	0.234426	0.226523	0.32204	0.263625
C2	-0.356673	-0.0592566	-0.286855	-0.0712542	-0.266074	-0.387051	-0.301123	-0.289143	0.00248284	-0.260666	-0.0983029	-0.212161	-0.0939613	-0.26642	-0.372787	-0.109971	0.0128557	-0.413679	0.00142271	-0.228787	-0.200609	-0.226344	-0.27875	-0.301914	0.00118889	-0.26666	0.0177062	0.0626935
C20orf141	0.297261	0.0923822	0.273515	0.21571	0.356215	0.452911	0.417023	0.303943	0.280166	0.114703	0.132579	0.346062	0.105803	0.138844	0.0729107	0.198729	0.0303047	0.0502358	0.137327	0.225316	0.171286	0.118693	0.189229	0.130597	0.0815346	0.0153369	-0.117042	0.175904
C20orf144	-0.970441	-0.937115	-1.03177	-1.14851	-1.14948	-1.43285	-1.13664	-1.26323	-1.1422	-1.1164	-1.18778	-1.30118	-1.11721	-1.39086	-1.10879	-1.08774	-0.941146	-0.878894	-1.02272	-1.13675	-1.42194	-1.07926	-1.56941	-1.56715	-1.36505	-1.16816	-1.7306	-1.64864
C20orf187	0.251494	0.290703	0.36622	0.104587	0.250821	0.281852	0.119527	0.368056	0.330888	0.179878	0.175362	0.31076	0.202702	0.30716	0.1354	0.0886183	0.330835	0.303235	0.132111	0.196525	0.209084	0.0478901	0.220003	0.0611532	0.123891	0.268354	0.0292764	0.279484
C20orf196	-0.761894	-0.734481	-0.594693	-0.9088	-0.88179	-0.870795	-0.78961	-0.81814	-0.664762	-0.566505	-0.747415	-0.800928	-0.53772	-0.672419	-0.510811	-0.690091	-0.474937	-0.35939	-0.359248	-0.596194	-0.450952	-0.590803	-0.687889	-0.865197	-0.41303	-0.410524	-0.650931	-0.358348
C20orf203	-0.240934	-0.493057	-0.385718	-0.371962	-0.211629	-0.462714	-0.755432	-0.310255	0.242006	-0.172834	-0.191485	-0.0101564	-0.0816551	0.0650051	0.0346442	-0.426637	-0.212955	-0.0714942	-0.0937993	-0.462331	-0.274879	-0.145821	-0.708651	-0.24292	-0.209306	-0.309824	-0.0625733	-0.106926
C20orf78	0.133096	0.162646	0.154781	0.198938	0.0759314	0.022914	0.0442724	0.192	0.230302	0.0804914	0.0515195	0.14541	0.0846875	0.0131201	-0.000615798	-0.0413754	-0.10736	0.182023	0.0540507	0.0227299	0.0796129	0.0560082	0.107172	0.239986	-0.0431815	0.0320295	0.053795	0.0389081
C21orf2	-0.414008	-0.533654	-0.774442	-0.263857	-0.416383	-0.785336	-0.37924	-0.472321	-0.377416	-0.402211	-0.364468	-0.579118	-0.267499	-0.2719	-0.445532	-0.0332993	-0.12816	-0.245516	0.114646	-0.335565	-0.0905475	-0.0669478	-0.452252	-0.449032	0.206359	-0.532886	-0.213098	0.336809
C21orf33	0.0390275	0.00228579	0.253482	0.146863	-0.0585339	0.251608	-0.341005	-0.205937	0.0515204	0.123723	0.0548113	0.305359	0.359688	0.486516	0.590826	0.608251	0.847774	0.864427	0.582693	0.320923	0.575741	0.554895	0.705234	0.831598	0.579255	0.672973	0.567256	0.534838
C21orf58	-1.67007	-1.01836	-0.991127	-0.896332	-1.30308	-1.41754	-0.993218	-1.11601	-1.20045	-1.01495	-1.13488	-1.28618	-1.20784	-1.48786	-1.42717	-1.31833	-1.37437	-1.3414	-1.31944	-1.24789	-1.26932	-1.5218	-1.48944	-1.3518	-1.34895	-1.36636	-1.58289	0.454158
C21orf59	-0.101258	-0.0125505	-0.111718	-0.177931	-0.185223	-0.100544	-0.0253364	-0.142577	-0.390126	-0.308393	-0.207161	-0.00709329	-0.145174	-0.254144	-0.101552	-0.107969	-0.132208	-0.146883	-0.164267	-0.216347	-0.122769	-0.0870262	-0.0653125	-0.0409532	-0.175953	-0.0841993	-0.016232	-0.0977945
C21orf91	0.124717	0.195264	0.203449	0.240385	0.140513	0.229945	0.185234	0.120872	-0.0783076	-0.159722	0.0158177	-0.182843	-0.159774	-0.0287152	-0.22539	-0.146358	-0.158052	0.0366539	-0.0836912	-0.150376	0.162243	0.0539545	0.117519	-0.00066765	0.0131579	0.0370137	0.0700596	0.0230851
C21orf91-OT1	-0.332598	-0.102582	-0.0130242	-0.154093	-0.237852	-0.302368	-0.11214	-0.104867	-0.284957	-0.151454	-0.179991	-0.428107	-0.246363	-0.431136	-0.276908	-0.383452	-0.33864	-0.237282	-0.265955	-0.226303	-0.326253	-0.435621	-0.422234	-0.348602	-0.413	-0.442633	-0.434383	-0.232707
C22orf15	-0.161653	-0.213247	-0.212049	-0.031406	-0.0522072	-0.204501	-0.183715	-0.159344	-0.472626	-0.406724	-0.142019	-0.33605	-0.00975429	-0.321471	-0.172432	-0.141216	-0.329847	-0.184346	0.143076	0.156244	-0.0930739	-0.0688084	0.138704	-0.192394	-0.263991	-0.0784104	0.20133	-0.212218
[truncated: 12,535 more rows]
